# Supplementary material for: Neuronal temperature perception induces specific defenses that enable C. elegans to cope with the enhanced reactivity of hydrogen peroxide at high temperature
Source: eLife. 2022 Oct 13;11:e78941. doi: 10.7554/eLife.78941 (PMC9635881; doi:10.7554/eLife.78941)
Supplement: Figure 1—source data 1. [file elife-78941-fig1-data1.xlsx]

## Sheet: Figure 1
Figure 1
enthalpy of activation [ΔH‡] (kJ/mol)	reaction rate at 25°C / reaction rate at 20°C
0.1	1.01776
0.2	1.01846
0.3	1.01916
0.4	1.01986
0.5	1.02056
0.6	1.02126
0.7	1.02197
0.8	1.02267
0.9	1.02337
1	1.02408
1.1	1.02478
1.2	1.02549
1.3	1.02619
1.4	1.0269
1.5	1.02761
1.6	1.02831
1.7	1.02902
1.8	1.02973
1.9	1.03044
2	1.03115
2.1	1.03186
2.2	1.03257
2.3	1.03328
2.4	1.03399
2.5	1.0347
2.6	1.03541
2.7	1.03613
2.8	1.03684
2.9	1.03755
3	1.03827
3.1	1.03898
3.2	1.0397
3.3	1.04041
3.4	1.04113
3.5	1.04185
3.6	1.04256
3.7	1.04328
3.8	1.044
3.9	1.04472
4	1.04544
4.1	1.04616
4.2	1.04688
4.3	1.0476
4.4	1.04832
4.5	1.04904
4.6	1.04976
4.7	1.05048
4.8	1.05121
4.9	1.05193
5	1.05266
5.1	1.05338
5.2	1.05411
5.3	1.05483
5.4	1.05556
5.5	1.05628
5.6	1.05701
5.7	1.05774
5.8	1.05847
5.9	1.05919
6	1.05992
6.1	1.06065
6.2	1.06138
6.3	1.06211
6.4	1.06284
6.5	1.06358
6.6	1.06431
6.7	1.06504
6.8	1.06577
6.9	1.06651
7	1.06724
7.1	1.06798
7.2	1.06871
7.3	1.06945
7.4	1.07018
7.5	1.07092
7.6	1.07166
7.7	1.07239
7.8	1.07313
7.9	1.07387
8	1.07461
8.1	1.07535
8.2	1.07609
8.3	1.07683
8.4	1.07757
8.5	1.07831
8.6	1.07906
8.7	1.0798
8.8	1.08054
8.9	1.08129
9	1.08203
9.1	1.08277
9.2	1.08352
9.3	1.08427
9.4	1.08501
9.5	1.08576
9.6	1.08651
9.7	1.08725
9.8	1.088
9.9	1.08875
10	1.0895
10.1	1.09025
10.2	1.091
10.3	1.09175
10.4	1.0925
10.5	1.09326
10.6	1.09401
10.7	1.09476
10.8	1.09551
10.9	1.09627
11	1.09702
11.1	1.09778
11.2	1.09853
11.3	1.09929
11.4	1.10005
11.5	1.1008
11.6	1.10156
11.7	1.10232
11.8	1.10308
11.9	1.10384
12	1.1046
12.1	1.10536
12.2	1.10612
12.3	1.10688
12.4	1.10764
12.5	1.1084
12.6	1.10917
12.7	1.10993
12.8	1.11069
12.9	1.11146
13	1.11222
13.1	1.11299
13.2	1.11376
13.3	1.11452
13.4	1.11529
13.5	1.11606
13.6	1.11683
13.7	1.11759
13.8	1.11836
13.9	1.11913
14	1.1199
14.1	1.12067
14.2	1.12145
14.3	1.12222
14.4	1.12299
14.5	1.12376
14.6	1.12454
14.7	1.12531
14.8	1.12609
14.9	1.12686
15	1.12764
15.1	1.12841
15.2	1.12919
15.3	1.12997
15.4	1.13074
15.5	1.13152
15.6	1.1323
15.7	1.13308
15.8	1.13386
15.9	1.13464
16	1.13542
16.1	1.1362
16.2	1.13699
16.3	1.13777
16.4	1.13855
16.5	1.13933
16.6	1.14012
16.7	1.1409
16.8	1.14169
16.9	1.14247
17	1.14326
17.1	1.14405
17.2	1.14484
17.3	1.14562
17.4	1.14641
17.5	1.1472
17.6	1.14799
17.7	1.14878
17.8	1.14957
17.9	1.15036
18	1.15115
18.1	1.15195
18.2	1.15274
18.3	1.15353
18.4	1.15433
18.5	1.15512
18.6	1.15592
18.7	1.15671
18.8	1.15751
18.9	1.15831
19	1.1591
19.1	1.1599
19.2	1.1607
19.3	1.1615
19.4	1.1623
19.5	1.1631
19.6	1.1639
19.7	1.1647
19.8	1.1655
19.9	1.1663
20	1.16711
20.1	1.16791
20.2	1.16871
20.3	1.16952
20.4	1.17032
20.5	1.17113
20.6	1.17193
20.7	1.17274
20.8	1.17355
20.9	1.17436
21	1.17516
21.1	1.17597
21.2	1.17678
21.3	1.17759
21.4	1.1784
21.5	1.17921
21.6	1.18003
21.7	1.18084
21.8	1.18165
21.9	1.18246
22	1.18328
22.1	1.18409
22.2	1.18491
22.3	1.18572
22.4	1.18654
22.5	1.18736
22.6	1.18817
22.7	1.18899
22.8	1.18981
22.9	1.19063
23	1.19145
23.1	1.19227
23.2	1.19309
23.3	1.19391
23.4	1.19473
23.5	1.19555
23.6	1.19638
23.7	1.1972
23.8	1.19802
23.9	1.19885
24	1.19967
24.1	1.2005
24.2	1.20133
24.3	1.20215
24.4	1.20298
24.5	1.20381
24.6	1.20464
24.7	1.20547
24.8	1.2063
24.9	1.20713
25	1.20796
25.1	1.20879
25.2	1.20962
25.3	1.21045
25.4	1.21129
25.5	1.21212
25.6	1.21295
25.7	1.21379
25.8	1.21463
25.9	1.21546
26	1.2163
26.1	1.21713
26.2	1.21797
26.3	1.21881
26.4	1.21965
26.5	1.22049
26.6	1.22133
26.7	1.22217
26.8	1.22301
26.9	1.22385
27	1.2247
27.1	1.22554
27.2	1.22638
27.3	1.22723
27.4	1.22807
27.5	1.22892
27.6	1.22976
27.7	1.23061
27.8	1.23146
27.9	1.2323
28	1.23315
28.1	1.234
28.2	1.23485
28.3	1.2357
28.4	1.23655
28.5	1.2374
28.6	1.23825
28.7	1.23911
28.8	1.23996
28.9	1.24081
29	1.24167
29.1	1.24252
29.2	1.24338
29.3	1.24423
29.4	1.24509
29.5	1.24594
29.6	1.2468
29.7	1.24766
29.8	1.24852
29.9	1.24938
30	1.25024
30.1	1.2511
30.2	1.25196
30.3	1.25282
30.4	1.25368
30.5	1.25455
30.6	1.25541
30.7	1.25628
30.8	1.25714
30.9	1.25801
31	1.25887
31.1	1.25974
31.2	1.2606
31.3	1.26147
31.4	1.26234
31.5	1.26321
31.6	1.26408
31.7	1.26495
31.8	1.26582
31.9	1.26669
32	1.26756
32.1	1.26844
32.2	1.26931
32.3	1.27018
32.4	1.27106
32.5	1.27193
32.6	1.27281
32.7	1.27368
32.8	1.27456
32.9	1.27544
33	1.27631
33.1	1.27719
33.2	1.27807
33.3	1.27895
33.4	1.27983
33.5	1.28071
33.6	1.28159
33.7	1.28248
33.8	1.28336
33.9	1.28424
34	1.28513
34.1	1.28601
34.2	1.2869
34.3	1.28778
34.4	1.28867
34.5	1.28956
34.6	1.29044
34.7	1.29133
34.8	1.29222
34.9	1.29311
35	1.294
35.1	1.29489
35.2	1.29578
35.3	1.29667
35.4	1.29757
35.5	1.29846
35.6	1.29935
35.7	1.30025
35.8	1.30114
35.9	1.30204
36	1.30293
36.1	1.30383
36.2	1.30473
36.3	1.30563
36.4	1.30653
36.5	1.30742
36.6	1.30832
36.7	1.30923
36.8	1.31013
36.9	1.31103
37	1.31193
37.1	1.31283
37.2	1.31374
37.3	1.31464
37.4	1.31555
37.5	1.31645
37.6	1.31736
37.7	1.31826
37.8	1.31917
37.9	1.32008
38	1.32099
38.1	1.3219
38.2	1.32281
38.3	1.32372
38.4	1.32463
38.5	1.32554
38.6	1.32645
38.7	1.32737
38.8	1.32828
38.9	1.32919
39	1.33011
39.1	1.33102
39.2	1.33194
39.3	1.33286
39.4	1.33378
39.5	1.33469
39.6	1.33561
39.7	1.33653
39.8	1.33745
39.9	1.33837
40	1.33929
40.1	1.34021
40.2	1.34114
40.3	1.34206
40.4	1.34298
40.5	1.34391
40.6	1.34483
40.7	1.34576
40.8	1.34669
40.9	1.34761
41	1.34854
41.1	1.34947
41.2	1.3504
41.3	1.35133
41.4	1.35226
41.5	1.35319
41.6	1.35412
41.7	1.35505
41.8	1.35598
41.9	1.35692
42	1.35785
42.1	1.35879
42.2	1.35972
42.3	1.36066
42.4	1.36159
42.5	1.36253
42.6	1.36347
42.7	1.36441
42.8	1.36535
42.9	1.36629
43	1.36723
43.1	1.36817
43.2	1.36911
43.3	1.37005
43.4	1.37099
43.5	1.37194
43.6	1.37288
43.7	1.37383
43.8	1.37477
43.9	1.37572
44	1.37667
44.1	1.37761
44.2	1.37856
44.3	1.37951
44.4	1.38046
44.5	1.38141
44.6	1.38236
44.7	1.38331
44.8	1.38427
44.9	1.38522
45	1.38617
45.1	1.38713
45.2	1.38808
45.3	1.38904
45.4	1.38999
45.5	1.39095
45.6	1.39191
45.7	1.39286
45.8	1.39382
45.9	1.39478
46	1.39574
46.1	1.3967
46.2	1.39766
46.3	1.39863
46.4	1.39959
46.5	1.40055
46.6	1.40152
46.7	1.40248
46.8	1.40345
46.9	1.40441
47	1.40538
47.1	1.40635
47.2	1.40731
47.3	1.40828
47.4	1.40925
47.5	1.41022
47.6	1.41119
47.7	1.41216
47.8	1.41314
47.9	1.41411
48	1.41508
48.1	1.41606
48.2	1.41703
48.3	1.41801
48.4	1.41898
48.5	1.41996
48.6	1.42094
48.7	1.42191
48.8	1.42289
48.9	1.42387
49	1.42485
49.1	1.42583
49.2	1.42682
49.3	1.4278
49.4	1.42878
49.5	1.42976
49.6	1.43075
49.7	1.43173
49.8	1.43272
49.9	1.4337
50	1.43469
50.1	1.43568
50.2	1.43667
50.3	1.43766
50.4	1.43864
50.5	1.43964
50.6	1.44063
50.7	1.44162
50.8	1.44261
50.9	1.4436
51	1.4446
51.1	1.44559
51.2	1.44659
51.3	1.44758
51.4	1.44858
51.5	1.44958
51.6	1.45057
51.7	1.45157
51.8	1.45257
51.9	1.45357
52	1.45457
52.1	1.45557
52.2	1.45657
52.3	1.45758
52.4	1.45858
52.5	1.45958
52.6	1.46059
52.7	1.46159
52.8	1.4626
52.9	1.46361
53	1.46461
53.1	1.46562
53.2	1.46663
53.3	1.46764
53.4	1.46865
53.5	1.46966
53.6	1.47067
53.7	1.47169
53.8	1.4727
53.9	1.47371
54	1.47473
54.1	1.47574
54.2	1.47676
54.3	1.47777
54.4	1.47879
54.5	1.47981
54.6	1.48083
54.7	1.48185
54.8	1.48287
54.9	1.48389
55	1.48491
55.1	1.48593
55.2	1.48695
55.3	1.48798
55.4	1.489
55.5	1.49003
55.6	1.49105
55.7	1.49208
55.8	1.4931
55.9	1.49413
56	1.49516
56.1	1.49619
56.2	1.49722
56.3	1.49825
56.4	1.49928
56.5	1.50031
56.6	1.50135
56.7	1.50238
56.8	1.50341
56.9	1.50445
57	1.50548
57.1	1.50652
57.2	1.50756
57.3	1.5086
57.4	1.50963
57.5	1.51067
57.6	1.51171
57.7	1.51275
57.8	1.51379
57.9	1.51484
58	1.51588
58.1	1.51692
58.2	1.51797
58.3	1.51901
58.4	1.52006
58.5	1.5211
58.6	1.52215
58.7	1.5232
58.8	1.52425
58.9	1.5253
59	1.52635
59.1	1.5274
59.2	1.52845
59.3	1.5295
59.4	1.53055
59.5	1.53161
59.6	1.53266
59.7	1.53371
59.8	1.53477
59.9	1.53583
60	1.53688
60.1	1.53794
60.2	1.539
60.3	1.54006
60.4	1.54112
60.5	1.54218
60.6	1.54324
60.7	1.5443
60.8	1.54537
60.9	1.54643
61	1.5475
61.1	1.54856
61.2	1.54963
61.3	1.55069
61.4	1.55176
61.5	1.55283
61.6	1.5539
61.7	1.55497
61.8	1.55604
61.9	1.55711
62	1.55818
62.1	1.55925
62.2	1.56033
62.3	1.5614
62.4	1.56247
62.5	1.56355
62.6	1.56463
62.7	1.5657
62.8	1.56678
62.9	1.56786
63	1.56894
63.1	1.57002
63.2	1.5711
63.3	1.57218
63.4	1.57326
63.5	1.57435
63.6	1.57543
63.7	1.57651
63.8	1.5776
63.9	1.57868
64	1.57977
64.1	1.58086
64.2	1.58195
64.3	1.58304
64.4	1.58412
64.5	1.58522
64.6	1.58631
64.7	1.5874
64.8	1.58849
64.9	1.58958
65	1.59068
65.1	1.59177
65.2	1.59287
65.3	1.59397
65.4	1.59506
65.5	1.59616
65.6	1.59726
65.7	1.59836
65.8	1.59946
65.9	1.60056
66	1.60166
66.1	1.60276
66.2	1.60387
66.3	1.60497
66.4	1.60608
66.5	1.60718
66.6	1.60829
66.7	1.60939
66.8	1.6105
66.9	1.61161
67	1.61272
67.1	1.61383
67.2	1.61494
67.3	1.61605
67.4	1.61716
67.5	1.61828
67.6	1.61939
67.7	1.62051
67.8	1.62162
67.9	1.62274
68	1.62385
68.1	1.62497
68.2	1.62609
68.3	1.62721
68.4	1.62833
68.5	1.62945
68.6	1.63057
68.7	1.63169
68.8	1.63282
68.9	1.63394
69	1.63507
69.1	1.63619
69.2	1.63732
69.3	1.63845
69.4	1.63957
69.5	1.6407
69.6	1.64183
69.7	1.64296
69.8	1.64409
69.9	1.64522
70	1.64636
70.1	1.64749
70.2	1.64862
70.3	1.64976
70.4	1.65089
70.5	1.65203
70.6	1.65317
70.7	1.6543
70.8	1.65544
70.9	1.65658
71	1.65772
71.1	1.65886
71.2	1.66001
71.3	1.66115
71.4	1.66229
71.5	1.66344
71.6	1.66458
71.7	1.66573
71.8	1.66687
71.9	1.66802
72	1.66917
72.1	1.67032
72.2	1.67147
72.3	1.67262
72.4	1.67377
72.5	1.67492
72.6	1.67607
72.7	1.67723
72.8	1.67838
72.9	1.67954
73	1.68069
73.1	1.68185
73.2	1.68301
73.3	1.68417
73.4	1.68533
73.5	1.68649
73.6	1.68765
73.7	1.68881
73.8	1.68997
73.9	1.69113
74	1.6923
74.1	1.69346
74.2	1.69463
74.3	1.69579
74.4	1.69696
74.5	1.69813
74.6	1.6993
74.7	1.70047
74.8	1.70164
74.9	1.70281
75	1.70398
75.1	1.70515
75.2	1.70633
75.3	1.7075
75.4	1.70868
75.5	1.70985
75.6	1.71103
75.7	1.71221
75.8	1.71339
75.9	1.71457
76	1.71575
76.1	1.71693
76.2	1.71811
76.3	1.71929
76.4	1.72048
76.5	1.72166
76.6	1.72285
76.7	1.72403
76.8	1.72522
76.9	1.72641
77	1.72759
77.1	1.72878
77.2	1.72997
77.3	1.73116
77.4	1.73235
77.5	1.73355
77.6	1.73474
77.7	1.73593
77.8	1.73713
77.9	1.73833
78	1.73952
78.1	1.74072
78.2	1.74192
78.3	1.74312
78.4	1.74432
78.5	1.74552
78.6	1.74672
78.7	1.74792
78.8	1.74912
78.9	1.75033
79	1.75153
79.1	1.75274
79.2	1.75394
79.3	1.75515
79.4	1.75636
79.5	1.75757
79.6	1.75878
79.7	1.75999
79.8	1.7612
79.9	1.76241
80	1.76363
80.1	1.76484
80.2	1.76605
80.3	1.76727
80.4	1.76849
80.5	1.7697
80.6	1.77092
80.7	1.77214
80.8	1.77336
80.9	1.77458
81	1.7758
81.1	1.77702
81.2	1.77825
81.3	1.77947
81.4	1.7807
81.5	1.78192
81.6	1.78315
81.7	1.78438
81.8	1.7856
81.9	1.78683
82	1.78806
82.1	1.78929
82.2	1.79053
82.3	1.79176
82.4	1.79299
82.5	1.79423
82.6	1.79546
82.7	1.7967
82.8	1.79793
82.9	1.79917
83	1.80041
83.1	1.80165
83.2	1.80289
83.3	1.80413
83.4	1.80537
83.5	1.80661
83.6	1.80786
83.7	1.8091
83.8	1.81035
83.9	1.81159
84	1.81284
84.1	1.81409
84.2	1.81534
84.3	1.81659
84.4	1.81784
84.5	1.81909
84.6	1.82034
84.7	1.82159
84.8	1.82285
84.9	1.8241
85	1.82536
85.1	1.82661
85.2	1.82787
85.3	1.82913
85.4	1.83039
85.5	1.83165
85.6	1.83291
85.7	1.83417
85.8	1.83543
85.9	1.8367
86	1.83796
86.1	1.83922
86.2	1.84049
86.3	1.84176
86.4	1.84303
86.5	1.84429
86.6	1.84556
86.7	1.84683
86.8	1.8481
86.9	1.84938
87	1.85065
87.1	1.85192
87.2	1.8532
87.3	1.85447
87.4	1.85575
87.5	1.85703
87.6	1.85831
87.7	1.85959
87.8	1.86087
87.9	1.86215
88	1.86343
88.1	1.86471
88.2	1.86599
88.3	1.86728
88.4	1.86856
88.5	1.86985
88.6	1.87114
88.7	1.87242
88.8	1.87371
88.9	1.875
89	1.87629
89.1	1.87759
89.2	1.87888
89.3	1.88017
89.4	1.88146
89.5	1.88276
89.6	1.88406
89.7	1.88535
89.8	1.88665
89.9	1.88795
90	1.88925
90.1	1.89055
90.2	1.89185
90.3	1.89315
90.4	1.89446
90.5	1.89576
90.6	1.89706
90.7	1.89837
90.8	1.89968
90.9	1.90098
91	1.90229
91.1	1.9036
91.2	1.90491
91.3	1.90622
91.4	1.90754
91.5	1.90885
91.6	1.91016
91.7	1.91148
91.8	1.91279
91.9	1.91411
92	1.91543
92.1	1.91675
92.2	1.91806
92.3	1.91938
92.4	1.92071
92.5	1.92203
92.6	1.92335
92.7	1.92467
92.8	1.926
92.9	1.92733
93	1.92865
93.1	1.92998
93.2	1.93131
93.3	1.93264
93.4	1.93397
93.5	1.9353
93.6	1.93663
93.7	1.93796
93.8	1.9393
93.9	1.94063
94	1.94197
94.1	1.9433
94.2	1.94464
94.3	1.94598
94.4	1.94732
94.5	1.94866
94.6	1.95
94.7	1.95134
94.8	1.95269
94.9	1.95403
95	1.95538
95.1	1.95672
95.2	1.95807
95.3	1.95942
95.4	1.96077
95.5	1.96212
95.6	1.96347
95.7	1.96482
95.8	1.96617
95.9	1.96752
96	1.96888
96.1	1.97023
96.2	1.97159
96.3	1.97295
96.4	1.9743
96.5	1.97566
96.6	1.97702
96.7	1.97838
96.8	1.97975
96.9	1.98111
97	1.98247
97.1	1.98384
97.2	1.9852
97.3	1.98657
97.4	1.98794
97.5	1.9893
97.6	1.99067
97.7	1.99204
97.8	1.99341
97.9	1.99479
98	1.99616
98.1	1.99753
98.2	1.99891
98.3	2.00028
98.4	2.00166
98.5	2.00304
98.6	2.00442
98.7	2.0058
98.8	2.00718
98.9	2.00856
99	2.00994
99.1	2.01133
99.2	2.01271
99.3	2.0141
99.4	2.01548
99.5	2.01687
99.6	2.01826
99.7	2.01965
99.8	2.02104
99.9	2.02243
100	2.02382
100.1	2.02521
100.2	2.02661
100.3	2.028
100.4	2.0294
100.5	2.03079
100.6	2.03219
100.7	2.03359
100.8	2.03499
100.9	2.03639
101	2.03779
101.1	2.0392
101.2	2.0406
101.3	2.042
101.4	2.04341
101.5	2.04482
101.6	2.04622
101.7	2.04763
101.8	2.04904
101.9	2.05045
102	2.05186
102.1	2.05327
102.2	2.05469
102.3	2.0561
102.4	2.05752
102.5	2.05893
102.6	2.06035
102.7	2.06177
102.8	2.06319
102.9	2.06461
103	2.06603
103.1	2.06745
103.2	2.06887
103.3	2.0703
103.4	2.07172
103.5	2.07315
103.6	2.07458
103.7	2.076
103.8	2.07743
103.9	2.07886
104	2.08029
104.1	2.08173
104.2	2.08316
104.3	2.08459
104.4	2.08603
104.5	2.08746
104.6	2.0889
104.7	2.09034
104.8	2.09178
104.9	2.09322
105	2.09466
105.1	2.0961
105.2	2.09754
105.3	2.09899
105.4	2.10043
105.5	2.10188
105.6	2.10332
105.7	2.10477
105.8	2.10622
105.9	2.10767
106	2.10912
106.1	2.11057
106.2	2.11202
106.3	2.11348
106.4	2.11493
106.5	2.11639
106.6	2.11785
106.7	2.1193
106.8	2.12076
106.9	2.12222
107	2.12368
107.1	2.12514
107.2	2.12661
107.3	2.12807
107.4	2.12954
107.5	2.131
107.6	2.13247
107.7	2.13394
107.8	2.1354
107.9	2.13687
108	2.13835
108.1	2.13982
108.2	2.14129
108.3	2.14276
108.4	2.14424
108.5	2.14571
108.6	2.14719
108.7	2.14867
108.8	2.15015
108.9	2.15163
109	2.15311
109.1	2.15459
109.2	2.15607
109.3	2.15756
109.4	2.15904
109.5	2.16053
109.6	2.16202
109.7	2.16351
109.8	2.16499
109.9	2.16648
110	2.16798
110.1	2.16947
110.2	2.17096
110.3	2.17246
110.4	2.17395
110.5	2.17545
110.6	2.17694
110.7	2.17844
110.8	2.17994
110.9	2.18144
111	2.18294
111.1	2.18445
111.2	2.18595
111.3	2.18746
111.4	2.18896
111.5	2.19047
111.6	2.19198
111.7	2.19348
111.8	2.19499
111.9	2.1965
112	2.19802
112.1	2.19953
112.2	2.20104
112.3	2.20256
112.4	2.20407
112.5	2.20559
112.6	2.20711
112.7	2.20863
112.8	2.21015
112.9	2.21167
113	2.21319
113.1	2.21472
113.2	2.21624
113.3	2.21777
113.4	2.21929
113.5	2.22082
113.6	2.22235
113.7	2.22388
113.8	2.22541
113.9	2.22694
114	2.22847
114.1	2.23001
114.2	2.23154
114.3	2.23308
114.4	2.23462
114.5	2.23615
114.6	2.23769
114.7	2.23923
114.8	2.24077
114.9	2.24232
115	2.24386
115.1	2.2454
115.2	2.24695
115.3	2.2485
115.4	2.25004
115.5	2.25159
115.6	2.25314
115.7	2.25469
115.8	2.25625
115.9	2.2578
116	2.25935
116.1	2.26091
116.2	2.26246
116.3	2.26402
116.4	2.26558
116.5	2.26714
116.6	2.2687
116.7	2.27026
116.8	2.27182
116.9	2.27339
117	2.27495
117.1	2.27652
117.2	2.27809
117.3	2.27965
117.4	2.28122
117.5	2.28279
117.6	2.28436
117.7	2.28594
117.8	2.28751
117.9	2.28908
118	2.29066
118.1	2.29224
118.2	2.29381
118.3	2.29539
118.4	2.29697
118.5	2.29855
118.6	2.30014
118.7	2.30172
118.8	2.3033
118.9	2.30489
119	2.30648
119.1	2.30806
119.2	2.30965
119.3	2.31124
119.4	2.31283
119.5	2.31442
119.6	2.31602
119.7	2.31761
119.8	2.31921
119.9	2.3208
120	2.3224
120.1	2.324
120.2	2.3256
120.3	2.3272
120.4	2.3288
120.5	2.3304
120.6	2.33201
120.7	2.33361
120.8	2.33522
120.9	2.33683
121	2.33844
121.1	2.34004
121.2	2.34166
121.3	2.34327
121.4	2.34488
121.5	2.34649
121.6	2.34811
121.7	2.34973
121.8	2.35134
121.9	2.35296
122	2.35458
122.1	2.3562
122.2	2.35782
122.3	2.35945
122.4	2.36107
122.5	2.3627
122.6	2.36432
122.7	2.36595
122.8	2.36758
122.9	2.36921
123	2.37084
123.1	2.37247
123.2	2.3741
123.3	2.37574
123.4	2.37737
123.5	2.37901
123.6	2.38065
123.7	2.38228
123.8	2.38392
123.9	2.38557
124	2.38721
124.1	2.38885
124.2	2.39049
124.3	2.39214
124.4	2.39379
124.5	2.39543
124.6	2.39708
124.7	2.39873
124.8	2.40038
124.9	2.40204
125	2.40369
125.1	2.40534
125.2	2.407
125.3	2.40866
125.4	2.41031
125.5	2.41197
125.6	2.41363
125.7	2.4153
125.8	2.41696
125.9	2.41862
126	2.42029
126.1	2.42195
126.2	2.42362
126.3	2.42529
126.4	2.42696
126.5	2.42863
126.6	2.4303
126.7	2.43197
126.8	2.43365
126.9	2.43532
127	2.437
127.1	2.43867
127.2	2.44035
127.3	2.44203
127.4	2.44371
127.5	2.4454
127.6	2.44708
127.7	2.44876
127.8	2.45045
127.9	2.45214
128	2.45382
128.1	2.45551
128.2	2.4572
128.3	2.45889
128.4	2.46059
128.5	2.46228
128.6	2.46397
128.7	2.46567
128.8	2.46737
128.9	2.46907
129	2.47077
129.1	2.47247
129.2	2.47417
129.3	2.47587
129.4	2.47758
129.5	2.47928
129.6	2.48099
129.7	2.48269
129.8	2.4844
129.9	2.48611
130	2.48782
130.1	2.48954
130.2	2.49125
130.3	2.49297
130.4	2.49468
130.5	2.4964
130.6	2.49812
130.7	2.49984
130.8	2.50156
130.9	2.50328
131	2.505
131.1	2.50673
131.2	2.50845
131.3	2.51018
131.4	2.51191
131.5	2.51363
131.6	2.51537
131.7	2.5171
131.8	2.51883
131.9	2.52056
132	2.5223
132.1	2.52403
132.2	2.52577
132.3	2.52751
132.4	2.52925
132.5	2.53099
132.6	2.53273
132.7	2.53448
132.8	2.53622
132.9	2.53797
133	2.53971
133.1	2.54146
133.2	2.54321
133.3	2.54496
133.4	2.54671
133.5	2.54847
133.6	2.55022
133.7	2.55197
133.8	2.55373
133.9	2.55549
134	2.55725
134.1	2.55901
134.2	2.56077
134.3	2.56253
134.4	2.5643
134.5	2.56606
134.6	2.56783
134.7	2.56959
134.8	2.57136
134.9	2.57313
135	2.5749
135.1	2.57668
135.2	2.57845
135.3	2.58023
135.4	2.582
135.5	2.58378
135.6	2.58556
135.7	2.58734
135.8	2.58912
135.9	2.5909
136	2.59268
136.1	2.59447
136.2	2.59625
136.3	2.59804
136.4	2.59983
136.5	2.60162
136.6	2.60341
136.7	2.6052
136.8	2.60699
136.9	2.60879
137	2.61058
137.1	2.61238
137.2	2.61418
137.3	2.61598
137.4	2.61778
137.5	2.61958
137.6	2.62138
137.7	2.62319
137.8	2.62499
137.9	2.6268
138	2.62861
138.1	2.63042
138.2	2.63223
138.3	2.63404
138.4	2.63585
138.5	2.63767
138.6	2.63948
138.7	2.6413
138.8	2.64312
138.9	2.64494
139	2.64676
139.1	2.64858
139.2	2.6504
139.3	2.65223
139.4	2.65405
139.5	2.65588
139.6	2.65771
139.7	2.65954
139.8	2.66137
139.9	2.6632
140	2.66503
140.1	2.66687
140.2	2.6687
140.3	2.67054
140.4	2.67238
140.5	2.67422
140.6	2.67606
140.7	2.6779
140.8	2.67974
140.9	2.68159
141	2.68343
141.1	2.68528
141.2	2.68713
141.3	2.68898
141.4	2.69083
141.5	2.69268
141.6	2.69453
141.7	2.69639
141.8	2.69824
141.9	2.7001
142	2.70196
142.1	2.70382
142.2	2.70568
142.3	2.70754
142.4	2.70941
142.5	2.71127
142.6	2.71314
142.7	2.71501
142.8	2.71687
142.9	2.71874
143	2.72062
143.1	2.72249
143.2	2.72436
143.3	2.72624
143.4	2.72811
143.5	2.72999
143.6	2.73187
143.7	2.73375
143.8	2.73563
143.9	2.73752
144	2.7394
144.1	2.74129
144.2	2.74317
144.3	2.74506
144.4	2.74695
144.5	2.74884
144.6	2.75073
144.7	2.75263
144.8	2.75452
144.9	2.75642
145	2.75831
145.1	2.76021
145.2	2.76211
145.3	2.76401
145.4	2.76592
145.5	2.76782
145.6	2.76973
145.7	2.77163
145.8	2.77354
145.9	2.77545
146	2.77736
146.1	2.77927
146.2	2.78118
146.3	2.7831
146.4	2.78501
146.5	2.78693
146.6	2.78885
146.7	2.79077
146.8	2.79269
146.9	2.79461
147	2.79654
147.1	2.79846
147.2	2.80039
147.3	2.80231
147.4	2.80424
147.5	2.80617
147.6	2.8081
147.7	2.81004
147.8	2.81197
147.9	2.81391
148	2.81584
148.1	2.81778
148.2	2.81972
148.3	2.82166
148.4	2.8236
148.5	2.82555
148.6	2.82749
148.7	2.82944
148.8	2.83139
148.9	2.83334
149	2.83529
149.1	2.83724
149.2	2.83919
149.3	2.84114
149.4	2.8431
149.5	2.84506
149.6	2.84702
149.7	2.84898
149.8	2.85094
149.9	2.8529
150	2.85486
150.1	2.85683
150.2	2.85879
150.3	2.86076
150.4	2.86273
150.5	2.8647
150.6	2.86667
150.7	2.86865
150.8	2.87062
150.9	2.8726
151	2.87457
151.1	2.87655
151.2	2.87853
151.3	2.88051
151.4	2.8825
151.5	2.88448
151.6	2.88647
151.7	2.88845
151.8	2.89044
151.9	2.89243
152	2.89442
152.1	2.89641
152.2	2.89841
152.3	2.9004
152.4	2.9024
152.5	2.9044
152.6	2.9064
152.7	2.9084
152.8	2.9104
152.9	2.9124
153	2.91441
153.1	2.91641
153.2	2.91842
153.3	2.92043
153.4	2.92244
153.5	2.92445
153.6	2.92646
153.7	2.92848
153.8	2.93049
153.9	2.93251
154	2.93453
154.1	2.93655
154.2	2.93857
154.3	2.94059
154.4	2.94262
154.5	2.94464
154.6	2.94667
154.7	2.9487
154.8	2.95073
154.9	2.95276
155	2.95479
155.1	2.95682
155.2	2.95886
155.3	2.96089
155.4	2.96293
155.5	2.96497
155.6	2.96701
155.7	2.96906
155.8	2.9711
155.9	2.97314
156	2.97519
156.1	2.97724
156.2	2.97929
156.3	2.98134
156.4	2.98339
156.5	2.98544
156.6	2.9875
156.7	2.98956
156.8	2.99161
156.9	2.99367
157	2.99573
157.1	2.99779
157.2	2.99986
157.3	3.00192
157.4	3.00399
157.5	3.00606
157.6	3.00813
157.7	3.0102
157.8	3.01227
157.9	3.01434
158	3.01642
158.1	3.01849
158.2	3.02057
158.3	3.02265
158.4	3.02473
158.5	3.02681
158.6	3.0289
158.7	3.03098
158.8	3.03307
158.9	3.03515
159	3.03724
159.1	3.03933
159.2	3.04143
159.3	3.04352
159.4	3.04561
159.5	3.04771
159.6	3.04981
159.7	3.05191
159.8	3.05401
159.9	3.05611
160	3.05821
160.1	3.06032
160.2	3.06243
160.3	3.06453
160.4	3.06664
160.5	3.06875
160.6	3.07087
160.7	3.07298
160.8	3.07509
160.9	3.07721
161	3.07933
161.1	3.08145
161.2	3.08357
161.3	3.08569
161.4	3.08782
161.5	3.08994
161.6	3.09207
161.7	3.0942
161.8	3.09633
161.9	3.09846
162	3.10059
162.1	3.10272
162.2	3.10486
162.3	3.107
162.4	3.10914
162.5	3.11128
162.6	3.11342
162.7	3.11556
162.8	3.1177
162.9	3.11985
163	3.122
163.1	3.12415
163.2	3.1263
163.3	3.12845
163.4	3.1306
163.5	3.13276
163.6	3.13491
163.7	3.13707
163.8	3.13923
163.9	3.14139
164	3.14355
164.1	3.14572
164.2	3.14788
164.3	3.15005
164.4	3.15222
164.5	3.15439
164.6	3.15656
164.7	3.15873
164.8	3.16091
164.9	3.16308
165	3.16526
165.1	3.16744
165.2	3.16962
165.3	3.1718
165.4	3.17398
165.5	3.17617
165.6	3.17835
165.7	3.18054
165.8	3.18273
165.9	3.18492
166	3.18711
166.1	3.18931
166.2	3.1915
166.3	3.1937
166.4	3.1959
166.5	3.1981
166.6	3.2003
166.7	3.2025
166.8	3.20471
166.9	3.20691
167	3.20912
167.1	3.21133
167.2	3.21354
167.3	3.21575
167.4	3.21796
167.5	3.22018
167.6	3.22239
167.7	3.22461
167.8	3.22683
167.9	3.22905
168	3.23128
168.1	3.2335
168.2	3.23573
168.3	3.23795
168.4	3.24018
168.5	3.24241
168.6	3.24464
168.7	3.24688
168.8	3.24911
168.9	3.25135
169	3.25359
169.1	3.25583
169.2	3.25807
169.3	3.26031
169.4	3.26255
169.5	3.2648
169.6	3.26705
169.7	3.26929
169.8	3.27154
169.9	3.2738
170	3.27605
170.1	3.2783
170.2	3.28056
170.3	3.28282
170.4	3.28508
170.5	3.28734
170.6	3.2896
170.7	3.29187
170.8	3.29413
170.9	3.2964
171	3.29867
171.1	3.30094
171.2	3.30321
171.3	3.30549
171.4	3.30776
171.5	3.31004
171.6	3.31232
171.7	3.3146
171.8	3.31688
171.9	3.31916
172	3.32144
172.1	3.32373
172.2	3.32602
172.3	3.32831
172.4	3.3306
172.5	3.33289
172.6	3.33519
172.7	3.33748
172.8	3.33978
172.9	3.34208
173	3.34438
173.1	3.34668
173.2	3.34898
173.3	3.35129
173.4	3.3536
173.5	3.3559
173.6	3.35821
173.7	3.36052
173.8	3.36284
173.9	3.36515
174	3.36747
174.1	3.36979
174.2	3.37211
174.3	3.37443
174.4	3.37675
174.5	3.37907
174.6	3.3814
174.7	3.38373
174.8	3.38606
174.9	3.38839
175	3.39072
175.1	3.39305
175.2	3.39539
175.3	3.39773
175.4	3.40006
175.5	3.4024
175.6	3.40475
175.7	3.40709
175.8	3.40944
175.9	3.41178
176	3.41413
176.1	3.41648
176.2	3.41883
176.3	3.42119
176.4	3.42354
176.5	3.4259
176.6	3.42825
176.7	3.43061
176.8	3.43298
176.9	3.43534
177	3.4377
177.1	3.44007
177.2	3.44244
177.3	3.44481
177.4	3.44718
177.5	3.44955
177.6	3.45193
177.7	3.4543
177.8	3.45668
177.9	3.45906
178	3.46144
178.1	3.46382
178.2	3.46621
178.3	3.46859
178.4	3.47098
178.5	3.47337
178.6	3.47576
178.7	3.47815
178.8	3.48055
178.9	3.48294
179	3.48534
179.1	3.48774
179.2	3.49014
179.3	3.49254
179.4	3.49494
179.5	3.49735
179.6	3.49976
179.7	3.50217
179.8	3.50458
179.9	3.50699
180	3.5094
180.1	3.51182
180.2	3.51424
180.3	3.51665
180.4	3.51907
180.5	3.5215
180.6	3.52392
180.7	3.52635
180.8	3.52877
180.9	3.5312
181	3.53363
181.1	3.53607
181.2	3.5385
181.3	3.54093
181.4	3.54337
181.5	3.54581
181.6	3.54825
181.7	3.55069
181.8	3.55314
181.9	3.55558
182	3.55803
182.1	3.56048
182.2	3.56293
182.3	3.56538
182.4	3.56784
182.5	3.57029
182.6	3.57275
182.7	3.57521
182.8	3.57767
182.9	3.58013
183	3.5826
183.1	3.58506
183.2	3.58753
183.3	3.59
183.4	3.59247
183.5	3.59494
183.6	3.59742
183.7	3.59989
183.8	3.60237
183.9	3.60485
184	3.60733
184.1	3.60982
184.2	3.6123
184.3	3.61479
184.4	3.61728
184.5	3.61977
184.6	3.62226
184.7	3.62475
184.8	3.62725
184.9	3.62974
185	3.63224
185.1	3.63474
185.2	3.63724
185.3	3.63975
185.4	3.64225
185.5	3.64476
185.6	3.64727
185.7	3.64978
185.8	3.65229
185.9	3.6548
186	3.65732
186.1	3.65984
186.2	3.66236
186.3	3.66488
186.4	3.6674
186.5	3.66992
186.6	3.67245
186.7	3.67498
186.8	3.67751
186.9	3.68004
187	3.68257
187.1	3.68511
187.2	3.68764
187.3	3.69018
187.4	3.69272
187.5	3.69526
187.6	3.69781
187.7	3.70035
187.8	3.7029
187.9	3.70545
188	3.708
188.1	3.71055
188.2	3.7131
188.3	3.71566
188.4	3.71822
188.5	3.72078
188.6	3.72334
188.7	3.7259
188.8	3.72846
188.9	3.73103
189	3.7336
189.1	3.73617
189.2	3.73874
189.3	3.74131
189.4	3.74389
189.5	3.74647
189.6	3.74904
189.7	3.75162
189.8	3.75421
189.9	3.75679
190	3.75938
190.1	3.76196
190.2	3.76455
190.3	3.76715
190.4	3.76974
190.5	3.77233
190.6	3.77493
190.7	3.77753
190.8	3.78013
190.9	3.78273
191	3.78533
191.1	3.78794
191.2	3.79055
191.3	3.79316
191.4	3.79577
191.5	3.79838
191.6	3.80099
191.7	3.80361
191.8	3.80623
191.9	3.80885
192	3.81147
192.1	3.81409
192.2	3.81672
192.3	3.81935
192.4	3.82197
192.5	3.8246
192.6	3.82724
192.7	3.82987
192.8	3.83251
192.9	3.83515
193	3.83779
193.1	3.84043
193.2	3.84307
193.3	3.84572
193.4	3.84836
193.5	3.85101
193.6	3.85366
193.7	3.85631
193.8	3.85897
193.9	3.86163
194	3.86428
194.1	3.86694
194.2	3.8696
194.3	3.87227
194.4	3.87493
194.5	3.8776
194.6	3.88027
194.7	3.88294
194.8	3.88561
194.9	3.88829
195	3.89096
195.1	3.89364
195.2	3.89632
195.3	3.899
195.4	3.90169
195.5	3.90437
195.6	3.90706
195.7	3.90975
195.8	3.91244
195.9	3.91513
196	3.91783
196.1	3.92053
196.2	3.92322
196.3	3.92592
196.4	3.92863
196.5	3.93133
196.6	3.93404
196.7	3.93674
196.8	3.93945
196.9	3.94217
197	3.94488
197.1	3.9476
197.2	3.95031
197.3	3.95303
197.4	3.95575
197.5	3.95847
197.6	3.9612
197.7	3.96393
197.8	3.96665
197.9	3.96938
198	3.97212
198.1	3.97485
198.2	3.97759
198.3	3.98032
198.4	3.98306
198.5	3.98581
198.6	3.98855
198.7	3.99129
198.8	3.99404
198.9	3.99679
199	3.99954
199.1	4.0023
199.2	4.00505
199.3	4.00781
199.4	4.01057
199.5	4.01333
199.6	4.01609
199.7	4.01885
199.8	4.02162
[truncated: 2 more rows]
