# Supplementary material for: Neuronal temperature perception induces specific defenses that enable C. elegans to cope with the enhanced reactivity of hydrogen peroxide at high temperature
Source: eLife. 2022 Oct 13;11:e78941. doi: 10.7554/eLife.78941 (PMC9635881; doi:10.7554/eLife.78941)
Supplement: Figure 2—figure supplement 1—source data 1. [file elife-78941-fig2-figsupp1-data1.xlsx]

## Sheet: Figure 2S1A
Figure 2S1A
wild type 25°C								wild type 20°C → 25°C on day 1								wild type 20°C → 25°C on day 2								wild type 20°C → 25°C on day 0
Age at Death (d)	Survival	Failure	SurvStdErr	Number failed	Number censored	At Risk		Age at Death (d)	Survival	Failure	SurvStdErr	Number failed	Number censored	At Risk		Age at Death (d)	Survival	Failure	SurvStdErr	Number failed	Number censored	At Risk		Age at Death (d)	Survival	Failure	SurvStdErr	Number failed	Number censored	At Risk
0	1	0	0	0	0	78		0	1	0	0	0	0	127		0	1	0	0	0	0	127		0	1	0	0	0	0	133
0.64421	0.9872	0.0128	0.0127	1	0	78		0.26921	0.9921	0.0079	0.0078	1	0	127		0.15463	0.9921	0.0079	0.0078	1	0	127		0.59213	0.9925	0.0075	0.0075	1	0	133
0.65463	0.9615	0.0385	0.0218	2	0	77		0.3213	0.9843	0.0157	0.011	1	0	126		0.41505	0.9764	0.0236	0.0135	2	0	126		0.61296	0.985	0.015	0.0106	1	0	132
0.67546	0.9487	0.0513	0.025	1	0	75		0.35255	0.9685	0.0315	0.0155	2	0	125		0.42546	0.9685	0.0315	0.0155	1	0	124		0.62338	0.9624	0.0376	0.0165	3	0	131
0.71713	0.9231	0.0769	0.0302	2	0	74		0.36296	0.9606	0.0394	0.0173	1	0	123		0.45671	0.9291	0.0709	0.0228	5	0	123		0.64421	0.9474	0.0526	0.0194	2	0	128
0.72755	0.8974	0.1026	0.0344	2	0	72		0.37338	0.9528	0.0472	0.0188	1	0	122		0.46713	0.9055	0.0945	0.026	3	0	118		0.65463	0.9398	0.0602	0.0206	1	0	126
0.73796	0.8846	0.1154	0.0362	1	0	70		0.39421	0.8976	0.1024	0.0269	7	0	121		0.49838	0.8898	0.1102	0.0278	2	0	115		0.66505	0.9173	0.0827	0.0239	3	0	125
0.7588	0.8462	0.1538	0.0409	3	0	69		0.40463	0.8819	0.1181	0.0286	2	0	114		0.5088	0.8425	0.1575	0.0323	6	0	113		0.67546	0.8797	0.1203	0.0282	5	0	122
0.76921	0.8205	0.1795	0.0435	2	0	66		0.43588	0.8583	0.1417	0.0309	3	0	112		0.52963	0.8346	0.1654	0.033	1	0	107		0.68588	0.8421	0.1579	0.0316	5	0	117
0.80046	0.8077	0.1923	0.0446	1	0	64		0.4463	0.8504	0.1496	0.0317	1	0	109		0.54005	0.7874	0.2126	0.0363	6	0	106		0.6963	0.8346	0.1654	0.0322	1	0	112
0.81088	0.7949	0.2051	0.0457	1	0	63		0.46713	0.8425	0.1575	0.0323	1	0	108		0.55046	0.748	0.252	0.0385	5	0	100		0.71713	0.812	0.188	0.0339	3	0	111
0.84213	0.7821	0.2179	0.0467	1	0	62		0.47755	0.7874	0.2126	0.0363	7	0	107		0.5713	0.7165	0.2835	0.04	4	0	95		0.72755	0.797	0.203	0.0349	2	0	108
0.86296	0.7564	0.2436	0.0486	2	0	61		0.48796	0.748	0.252	0.0385	5	0	100		0.58171	0.6378	0.3622	0.0426	10	0	91		0.73796	0.7895	0.2105	0.0354	1	0	106
0.87338	0.7179	0.2821	0.051	3	0	59		0.49838	0.7402	0.2598	0.0389	1	0	95		0.59213	0.5512	0.4488	0.0441	11	0	81		0.74838	0.7744	0.2256	0.0362	2	0	105
0.8838	0.6795	0.3205	0.0528	3	0	56		0.51921	0.7087	0.2913	0.0403	4	0	94		0.61296	0.4803	0.5197	0.0443	9	0	70		0.79005	0.7519	0.2481	0.0375	3	0	103
0.89421	0.6538	0.3462	0.0539	2	0	53		0.52963	0.6693	0.3307	0.0417	5	0	90		0.62338	0.4488	0.5512	0.0441	4	0	61		0.81088	0.7218	0.2782	0.0389	4	0	100
0.90463	0.641	0.359	0.0543	1	0	51		0.54005	0.6614	0.3386	0.042	1	0	85		0.6338	0.4409	0.5591	0.0441	1	0	57		0.8213	0.7068	0.2932	0.0395	2	0	96
0.91505	0.6154	0.3846	0.0551	2	0	50		0.55046	0.6457	0.3543	0.0424	2	0	84		0.64421	0.4173	0.5827	0.0438	3	0	56		0.83171	0.6992	0.3008	0.0398	1	0	94
0.92546	0.5769	0.4231	0.0559	3	0	48		0.56088	0.6299	0.3701	0.0428	2	0	82		0.65463	0.3937	0.6063	0.0434	3	0	53		0.84213	0.6917	0.3083	0.04	1	0	93
0.93588	0.5513	0.4487	0.0563	2	0	45		0.5713	0.6063	0.3937	0.0434	3	0	80		0.66505	0.378	0.622	0.043	2	0	50		0.85255	0.6767	0.3233	0.0406	2	0	92
0.97755	0.5128	0.4872	0.0566	3	0	43		0.58171	0.5984	0.4016	0.0435	1	0	77		0.67546	0.3543	0.6457	0.0424	3	0	48		0.86296	0.6541	0.3459	0.0412	3	0	90
0.98796	0.5	0.5	0.0566	1	0	40		0.60255	0.5748	0.4252	0.0439	3	0	76		0.68588	0.3071	0.6929	0.0409	6	0	45		0.87338	0.6316	0.3684	0.0418	3	0	87
0.99838	0.4744	0.5256	0.0565	2	0	39		0.61296	0.5512	0.4488	0.0441	3	0	73		0.6963	0.2835	0.7165	0.04	3	0	39		0.8838	0.609	0.391	0.0423	3	0	84
1.0088	0.4615	0.5385	0.0564	1	0	37		0.62338	0.5118	0.4882	0.0444	5	0	70		0.70671	0.2756	0.7244	0.0396	1	0	36		0.89421	0.5865	0.4135	0.0427	3	0	81
1.02963	0.4487	0.5513	0.0563	1	0	36		0.6338	0.4882	0.5118	0.0444	3	0	65		0.71713	0.2598	0.7402	0.0389	2	0	35		0.90463	0.5714	0.4286	0.0429	2	0	78
1.04005	0.4231	0.5769	0.0559	2	0	35		0.65463	0.4567	0.5433	0.0442	4	0	62		0.72755	0.2047	0.7953	0.0358	7	0	33		0.91505	0.5263	0.4737	0.0433	6	0	76
1.05046	0.4103	0.5897	0.0557	1	0	33		0.66505	0.4094	0.5906	0.0436	6	0	58		0.73796	0.1732	0.8268	0.0336	4	0	26		0.92546	0.4887	0.5113	0.0433	5	0	70
1.06088	0.3974	0.6026	0.0554	1	0	32		0.67546	0.3858	0.6142	0.0432	3	0	52		0.76921	0.126	0.874	0.0294	6	0	22		0.93588	0.4812	0.5188	0.0433	1	0	65
1.0713	0.3718	0.6282	0.0547	2	0	31		0.70671	0.3465	0.6535	0.0422	5	0	49		0.77963	0.1181	0.8819	0.0286	1	0	16		0.9463	0.4511	0.5489	0.0431	4	0	64
1.08171	0.359	0.641	0.0543	1	0	29		0.71713	0.3307	0.6693	0.0417	2	0	44		0.81088	0.0866	0.9134	0.025	4	0	15		0.95671	0.4211	0.5789	0.0428	4	0	60
1.09213	0.3462	0.6538	0.0539	1	0	28		0.73796	0.315	0.685	0.0412	2	0	42		0.8213	0.0787	0.9213	0.0239	1	0	11		0.96713	0.4135	0.5865	0.0427	1	0	56
1.11296	0.3333	0.6667	0.0534	1	0	27		0.74838	0.2677	0.7323	0.0393	6	0	40		0.85255	0.0394	0.9606	0.0173	5	0	10		0.97755	0.3835	0.6165	0.0422	4	0	55
1.1338	0.3205	0.6795	0.0528	1	0	26		0.7588	0.2362	0.7638	0.0377	4	0	34		0.86296	0.0315	0.9685	0.0155	1	0	5		0.98796	0.3609	0.6391	0.0416	3	0	51
1.14421	0.3077	0.6923	0.0523	1	0	25		0.79005	0.2126	0.7874	0.0363	3	0	30		0.93588	0.0157	0.9843	0.011	2	0	4		0.99838	0.3459	0.6541	0.0412	2	0	48
1.15463	0.2949	0.7051	0.0516	1	0	24		0.80046	0.1732	0.8268	0.0336	5	0	27		0.97755	0.0079	0.9921	0.0078	1	0	2		1.0088	0.3233	0.6767	0.0406	3	0	46
1.16505	0.2692	0.7308	0.0502	2	0	23		0.81088	0.1654	0.8346	0.033	1	0	22		1.14421	0	1	0	1	0	1		1.01921	0.3083	0.6917	0.04	2	0	43
1.17546	0.2436	0.7564	0.0486	2	0	21		0.83171	0.1575	0.8425	0.0323	1	0	21										1.02963	0.3008	0.6992	0.0398	1	0	41
1.1963	0.2308	0.7692	0.0477	1	0	19		0.84213	0.1102	0.8898	0.0278	6	0	20										1.04005	0.2782	0.7218	0.0389	3	0	40
1.20671	0.2051	0.7949	0.0457	2	0	18		0.87338	0.0945	0.9055	0.026	2	0	14										1.05046	0.2556	0.7444	0.0378	3	0	37
1.22755	0.1923	0.8077	0.0446	1	0	16		0.91505	0.0866	0.9134	0.025	1	0	12										1.06088	0.2256	0.7744	0.0362	4	0	34
1.24838	0.1667	0.8333	0.0422	2	0	15		0.92546	0.0472	0.9528	0.0188	5	0	11										1.0713	0.203	0.797	0.0349	3	0	30
1.26921	0.141	0.859	0.0394	2	0	13		0.96713	0.0394	0.9606	0.0173	1	0	6										1.09213	0.1955	0.8045	0.0344	1	0	27
1.27963	0.1282	0.8718	0.0379	1	0	11		1.0088	0.0236	0.9764	0.0135	2	0	5										1.10255	0.1729	0.8271	0.0328	3	0	26
1.30046	0.1154	0.8846	0.0362	1	0	10		1.04005	0.0157	0.9843	0.011	1	0	3										1.11296	0.1579	0.8421	0.0316	2	0	23
1.3213	0.1026	0.8974	0.0344	1	0	9		1.05046	0.0079	0.9921	0.0078	1	0	2										1.12338	0.1278	0.8722	0.029	4	0	21
1.33171	0.0897	0.9103	0.0324	1	0	8		1.09213	0	1	0	1	0	1										1.1338	0.1128	0.8872	0.0274	2	0	17
1.40463	0.0769	0.9231	0.0302	1	0	7																		1.14421	0.0902	0.9098	0.0248	3	0	15
1.42546	0.0641	0.9359	0.0277	1	0	6																		1.15463	0.0752	0.9248	0.0229	2	0	12
1.49838	0.0385	0.9615	0.0218	2	0	5																		1.17546	0.0677	0.9323	0.0218	1	0	10
1.61296	0.0256	0.9744	0.0179	1	0	3																		1.1963	0.0602	0.9398	0.0206	1	0	9
1.6338	0.0128	0.9872	0.0127	1	0	2																		1.23796	0.0451	0.9549	0.018	2	0	8
2.0088	0	1	0	1	0	1																		1.24838	0.0376	0.9624	0.0165	1	0	6
																								1.34213	0.0301	0.9699	0.0148	1	0	5
																								1.41505	0.0226	0.9774	0.0129	1	0	4
																								1.45671	0.015	0.985	0.0106	1	0	3
																								1.51921	0.0075	0.9925	0.0075	1	0	2
																								1.7588	0	1	0	1	0	1

## Sheet: Figure 2S1B
Figure 2S1B
wild type 20°C								wild type 25°C → 20°C on day 1								wild type 25°C → 20°C on day 2								wild type 25°C → 20°C on day 0
Age at Death (d)	Survival	Failure	SurvStdErr	Number failed	Number censored	At Risk		Age at Death (d)	Survival	Failure	SurvStdErr	Number failed	Number censored	At Risk		Age at Death (d)	Survival	Failure	SurvStdErr	Number failed	Number censored	At Risk		Age at Death (d)	Survival	Failure	SurvStdErr	Number failed	Number censored	At Risk
0	1	0	0	0	0	155		0	1	0	0	0	0	157		0	1	0	0	0	0	152		0	1	0	0	0	0	129
0.25684	1	0	0	0	4	155		0.19504	1	0	0	0	2	157		0.24504	0.9934	0.0066	0.0066	1	0	152		0.12629	1	0	0	0	1	129
0.29851	1	0	0	0	1	151		0.40337	1	0	0	0	1	155		0.66309	0.9934	0.0066	0.0066	0	1	151		0.17976	1	0	0	0	1	128
1.10128	0.9933	0.0067	0.0066	1	0	150		1.01726	0.9935	0.0065	0.0065	1	0	154		1.24642	0.9934	0.0066	0.0066	0	1	150		0.25129	1	0	0	0	1	127
1.19087	0.9867	0.0133	0.0094	1	0	149		1.1117	0.987	0.013	0.0091	1	0	153		1.41309	0.9934	0.0066	0.0066	0	2	149		0.42976	1	0	0	0	1	126
1.2742	0.98	0.02	0.0114	1	0	148		1.47559	0.9805	0.0195	0.0111	1	0	152		1.50615	0.9867	0.0133	0.0094	1	0	147		1.05476	1	0	0	0	1	125
1.35128	0.98	0.02	0.0114	0	1	147		1.4867	0.974	0.026	0.0128	1	0	151		1.61031	0.9799	0.0201	0.0115	1	0	146		1.6874	0.9919	0.0081	0.008	1	0	124
1.36587	0.9733	0.0267	0.0132	1	0	146		1.51726	0.9675	0.0325	0.0143	1	0	150		1.6617	0.9731	0.0269	0.0132	1	0	145		1.72906	0.9839	0.0161	0.0113	1	0	123
1.40753	0.9666	0.0334	0.0147	1	0	145		1.60059	0.961	0.039	0.0156	1	0	149		1.67281	0.9596	0.0404	0.0161	2	0	144		1.74017	0.9758	0.0242	0.0138	1	0	122
1.42351	0.9599	0.0401	0.0161	1	0	144		1.60198	0.9545	0.0455	0.0168	1	0	148		1.67976	0.9529	0.0471	0.0174	1	0	142		1.79156	0.9677	0.0323	0.0159	1	0	121
1.45545	0.9532	0.0468	0.0173	1	0	143		1.64226	0.9481	0.0519	0.0179	1	0	147		1.70337	0.9461	0.0539	0.0185	1	0	141		1.79295	0.9597	0.0403	0.0177	1	0	120
1.46517	0.9464	0.0536	0.0184	1	0	142		1.65337	0.9416	0.0584	0.0189	1	0	146		1.74503	0.9394	0.0606	0.0196	1	0	140		1.83462	0.9516	0.0484	0.0193	1	0	119
1.47628	0.9397	0.0603	0.0195	1	0	141		1.71795	0.9351	0.0649	0.0199	1	0	145		1.75615	0.9326	0.0674	0.0206	1	0	139		1.85406	0.9435	0.0565	0.0207	1	0	118
1.48253	0.9397	0.0603	0.0195	0	1	140		1.75962	0.9286	0.0714	0.0208	1	0	144		1.80476	0.9258	0.0742	0.0215	1	0	138		1.86726	0.9355	0.0645	0.0221	1	0	117
1.49087	0.9397	0.0603	0.0195	0	4	139		1.76726	0.9221	0.0779	0.0216	1	0	143		1.82976	0.9258	0.0742	0.0215	0	1	137		1.88809	0.9194	0.0806	0.0245	2	0	116
1.5117	0.9328	0.0672	0.0205	1	0	135		1.78948	0.9156	0.0844	0.0224	1	0	142		1.88809	0.919	0.081	0.0224	1	0	136		1.89573	0.9113	0.0887	0.0255	1	0	114
1.5242	0.9258	0.0742	0.0215	1	0	134		1.80892	0.9091	0.0909	0.0232	1	0	141		1.94365	0.9122	0.0878	0.0233	1	0	135		1.90684	0.9032	0.0968	0.0266	1	0	113
1.53253	0.9119	0.0881	0.0234	2	0	133		1.82003	0.9026	0.0974	0.0239	1	1	140		1.9742	0.9054	0.0946	0.0241	1	0	134		1.91795	0.8871	0.1129	0.0284	2	0	112
1.55962	0.891	0.109	0.0257	3	0	131		1.84295	0.8961	0.1039	0.0246	1	0	138		1.99503	0.8918	0.1082	0.0255	2	0	133		1.9374	0.871	0.129	0.0301	2	0	110
1.5742	0.8632	0.1368	0.0285	4	0	128		1.88462	0.8895	0.1105	0.0253	1	0	137		2.00615	0.885	0.115	0.0262	1	0	131		1.97142	0.8629	0.1371	0.0309	1	0	108
1.59017	0.8562	0.1438	0.0291	1	0	124		1.89226	0.883	0.117	0.0259	1	0	136		2.01309	0.8782	0.1218	0.0269	1	0	130		2.00128	0.8548	0.1452	0.0316	1	0	107
1.60128	0.8492	0.1508	0.0296	1	0	123		1.92628	0.8764	0.1236	0.0265	1	0	135		2.03392	0.8714	0.1286	0.0276	1	0	129		2.04156	0.8468	0.1532	0.0323	1	0	106
1.6492	0.8423	0.1577	0.0302	1	0	122		1.96795	0.8634	0.1366	0.0277	2	0	134		2.0367	0.8646	0.1354	0.0282	1	0	128		2.05476	0.8387	0.1613	0.033	1	0	105
1.65753	0.8353	0.1647	0.0308	1	0	121		1.9867	0.8503	0.1497	0.0288	2	0	132		2.07976	0.8646	0.1354	0.0282	0	1	127		2.0624	0.8306	0.1694	0.0337	1	0	104
1.67351	0.8284	0.1716	0.0313	1	0	120		2.03948	0.8437	0.1563	0.0293	1	0	130		2.17281	0.8371	0.1629	0.0304	4	0	126		2.07351	0.8226	0.1774	0.0343	1	0	103
1.6992	0.8144	0.1856	0.0323	2	0	119		2.05128	0.8372	0.1628	0.0298	1	0	129		2.20476	0.8303	0.1697	0.0309	1	0	122		2.08462	0.8145	0.1855	0.0349	1	0	102
1.72628	0.8075	0.1925	0.0327	1	0	117		2.07003	0.8307	0.1693	0.0303	1	0	128		2.25615	0.8234	0.1766	0.0314	1	0	121		2.10406	0.8065	0.1935	0.0355	1	0	101
1.73253	0.8005	0.1995	0.0332	1	0	116		2.09295	0.8241	0.1759	0.0307	1	0	127		2.30476	0.8165	0.1835	0.0319	1	0	120		2.11517	0.7984	0.2016	0.036	1	0	100
1.7742	0.7935	0.2065	0.0336	1	0	115		2.15337	0.8176	0.1824	0.0312	1	0	126		2.32837	0.8097	0.1903	0.0324	1	0	119		2.11726	0.7903	0.2097	0.0366	1	0	99
1.79851	0.7935	0.2065	0.0336	0	5	114		2.17628	0.8045	0.1955	0.032	2	0	125		2.33948	0.8028	0.1972	0.0328	1	0	118		2.12628	0.7823	0.2177	0.0371	1	0	98
1.80962	0.7863	0.2137	0.0341	1	0	109		2.22559	0.7979	0.2021	0.0324	1	0	123		2.37142	0.796	0.204	0.0333	1	0	117		2.16795	0.7742	0.2258	0.0375	1	0	97
1.8242	0.7644	0.2356	0.0354	3	0	108		2.27837	0.7849	0.2151	0.0332	2	0	122		2.38115	0.7891	0.2109	0.0337	1	0	116		2.17976	0.7661	0.2339	0.038	1	0	96
1.8367	0.7571	0.2429	0.0358	1	0	105		2.28948	0.7783	0.2217	0.0335	1	0	120		2.38809	0.7822	0.2178	0.0341	1	0	115		2.1874	0.7581	0.2419	0.0385	1	0	95
1.84017	0.7499	0.2501	0.0362	1	0	104		2.32003	0.7718	0.2282	0.0339	1	0	119		2.41309	0.7754	0.2246	0.0345	1	0	114		2.25128	0.7419	0.2581	0.0393	2	0	94
1.85128	0.7207	0.2793	0.0376	4	0	103		2.33115	0.7652	0.2348	0.0342	1	0	118		2.42281	0.7616	0.2384	0.0352	2	0	113		2.27073	0.7339	0.2661	0.0397	1	0	92
1.85753	0.7062	0.2938	0.0382	2	0	99		2.35059	0.7587	0.2413	0.0346	1	0	117		2.42976	0.7548	0.2452	0.0355	1	0	111		2.29156	0.7258	0.2742	0.0401	1	0	91
1.88184	0.6989	0.3011	0.0385	1	0	97		2.3617	0.7391	0.2609	0.0355	3	0	116		2.45337	0.7479	0.2521	0.0359	1	0	110		2.33462	0.7097	0.2903	0.0408	2	0	90
1.89295	0.6916	0.3084	0.0388	1	0	96		2.37281	0.7325	0.2675	0.0358	1	0	113		2.45476	0.7411	0.2589	0.0362	1	0	109		2.34642	0.6935	0.3065	0.0414	2	0	88
1.8992	0.6843	0.3157	0.0391	1	0	95		2.40337	0.7325	0.2675	0.0358	0	2	112		2.46448	0.7411	0.2589	0.0362	0	2	108		2.35406	0.6855	0.3145	0.0417	1	0	86
1.92351	0.6698	0.3302	0.0396	2	0	94		2.42628	0.7259	0.2741	0.036	1	0	110		2.49642	0.7341	0.2659	0.0365	1	0	106		2.38809	0.6694	0.3306	0.0422	2	0	85
1.94087	0.6479	0.3521	0.0402	3	0	92		2.46795	0.7192	0.2808	0.0363	1	0	109		2.50615	0.7271	0.2729	0.0368	1	0	105		2.39573	0.6613	0.3387	0.0425	1	0	83
1.97628	0.6334	0.3666	0.0406	2	2	89		2.47559	0.7126	0.2874	0.0366	1	0	108		2.54781	0.7201	0.2799	0.0371	1	0	104		2.40684	0.6452	0.3548	0.043	2	0	82
1.98253	0.6259	0.3741	0.0408	1	0	85		2.4867	0.7059	0.2941	0.0369	1	0	107		2.57559	0.7131	0.2869	0.0374	1	0	103		2.42976	0.6371	0.3629	0.0432	1	0	80
1.99087	0.6185	0.3815	0.041	1	0	84		2.49781	0.6992	0.3008	0.0371	1	0	106		2.58948	0.7061	0.2939	0.0377	1	0	102		2.45962	0.629	0.371	0.0434	1	0	79
2.00684	0.5961	0.4039	0.0415	3	0	83		2.52837	0.6926	0.3074	0.0373	1	0	105		2.62142	0.6991	0.3009	0.038	1	0	101		2.49017	0.621	0.379	0.0436	1	0	78
2.01795	0.5812	0.4188	0.0418	2	0	80		2.55128	0.6859	0.3141	0.0376	1	0	104		2.64226	0.6921	0.3079	0.0382	1	0	100		2.54295	0.6048	0.3952	0.0439	2	0	77
2.03253	0.5738	0.4262	0.0419	1	0	78		2.56031	0.6793	0.3207	0.0378	1	0	103		2.70059	0.6851	0.3149	0.0385	1	0	99		2.57351	0.5968	0.4032	0.0441	1	0	75
2.04851	0.5589	0.4411	0.0421	2	0	77		2.59295	0.6726	0.3274	0.038	1	0	102		2.70337	0.6781	0.3219	0.0387	1	0	98		2.58462	0.5806	0.4194	0.0443	2	0	74
2.05962	0.5365	0.4635	0.0424	3	1	75		2.63462	0.6659	0.3341	0.0382	1	0	101		2.70476	0.6712	0.3288	0.0389	1	0	97		2.63809	0.5726	0.4274	0.0444	1	0	72
2.06587	0.529	0.471	0.0424	1	0	71		2.68392	0.6593	0.3407	0.0384	1	0	100		2.7867	0.6642	0.3358	0.0392	1	0	96		2.65684	0.5726	0.4274	0.0444	0	2	71
2.0742	0.5214	0.4786	0.0425	1	0	70		2.70615	0.6526	0.3474	0.0386	1	0	99		2.82837	0.6572	0.3428	0.0394	1	0	95		2.66795	0.5643	0.4357	0.0446	1	0	69
2.0867	0.5138	0.4862	0.0426	1	0	69		2.7367	0.646	0.354	0.0388	1	0	98		2.83948	0.6502	0.3498	0.0396	1	0	94		2.67976	0.556	0.444	0.0447	1	0	68
2.10128	0.4761	0.5239	0.0427	5	0	68		2.80128	0.6393	0.3607	0.0389	1	0	97		2.84642	0.6362	0.3638	0.0399	2	0	93		2.6874	0.5394	0.4606	0.0448	2	0	67
2.11587	0.4609	0.5391	0.0426	2	0	63		2.84295	0.6327	0.3673	0.0391	1	0	96		2.9117	0.6292	0.3708	0.0401	1	0	91		2.69851	0.5145	0.4855	0.045	3	0	65
2.14295	0.4534	0.5466	0.0426	1	0	61		2.89226	0.626	0.374	0.0392	1	0	95		2.97142	0.6152	0.3848	0.0404	2	0	90		2.70962	0.5062	0.4938	0.0451	1	0	62
2.1492	0.4458	0.5542	0.0425	1	0	60		2.93531	0.6193	0.3807	0.0394	1	0	94		2.98531	0.6012	0.3988	0.0407	2	0	88		2.72142	0.4979	0.5021	0.0451	1	0	61
2.15753	0.4307	0.5693	0.0424	2	0	59		2.97559	0.6127	0.3873	0.0395	1	0	93		2.99503	0.5942	0.4058	0.0408	1	0	86		2.76309	0.4896	0.5104	0.0451	1	0	60
2.17351	0.4081	0.5919	0.0422	3	0	57		2.9867	0.5927	0.4073	0.0399	3	0	92		2.99642	0.5733	0.4267	0.0411	3	0	85		2.79295	0.4813	0.5187	0.0451	1	0	59
2.18462	0.4005	0.5995	0.042	1	0	54		2.98878	0.586	0.414	0.04	1	0	89		3.02698	0.5663	0.4337	0.0412	1	0	82		2.80267	0.473	0.527	0.045	1	0	58
2.19087	0.3854	0.6146	0.0418	2	0	53		2.99781	0.5727	0.4273	0.0402	2	0	88		3.05476	0.5593	0.4407	0.0413	1	0	81		2.82351	0.4647	0.5353	0.045	1	0	57
2.21517	0.3778	0.6222	0.0417	1	0	51		3.05128	0.5661	0.4339	0.0403	1	0	86		3.07559	0.5523	0.4477	0.0414	1	0	80		2.83462	0.4564	0.5436	0.045	1	0	56
2.22628	0.3703	0.6297	0.0415	1	1	50		3.08115	0.5594	0.4406	0.0403	1	0	85		3.08948	0.5453	0.4547	0.0414	1	0	79		2.88809	0.4481	0.5519	0.0449	1	0	55
2.23253	0.3626	0.6374	0.0413	1	0	48		3.10059	0.5527	0.4473	0.0404	1	0	84		3.09642	0.5383	0.4617	0.0415	1	0	78		2.90684	0.4398	0.5602	0.0448	1	0	54
2.25684	0.3471	0.6529	0.041	2	0	47		3.1117	0.5394	0.4606	0.0405	2	0	83		3.12003	0.5313	0.4687	0.0415	1	0	77		2.97906	0.3983	0.6017	0.0443	5	0	53
2.26795	0.3317	0.6683	0.0406	2	0	45		3.14226	0.5328	0.4672	0.0405	1	0	81		3.13115	0.5243	0.4757	0.0416	1	0	76		2.99017	0.39	0.61	0.0441	1	0	48
2.2742	0.3008	0.6992	0.0396	4	0	43		3.16448	0.5261	0.4739	0.0406	1	0	80		3.1617	0.5173	0.4827	0.0416	1	0	75		2.99226	0.3734	0.6266	0.0438	2	0	47
2.29851	0.2931	0.7069	0.0394	1	0	39		3.20615	0.5194	0.4806	0.0406	1	0	79		3.16309	0.4964	0.5036	0.0416	3	0	74		3.00128	0.3651	0.6349	0.0436	1	0	45
2.31587	0.2777	0.7223	0.0388	2	0	38		3.21795	0.5061	0.4939	0.0406	2	0	78		3.17281	0.4894	0.5106	0.0416	1	0	71		3.05267	0.3568	0.6432	0.0434	1	0	44
2.3242	0.2777	0.7223	0.0388	0	3	36		3.2367	0.4995	0.5005	0.0407	1	0	76		3.17976	0.4824	0.5176	0.0416	1	0	70		3.05476	0.3485	0.6515	0.0432	1	0	43
2.36587	0.2693	0.7307	0.0385	1	0	33		3.30892	0.4928	0.5072	0.0407	1	0	75		3.20337	0.4754	0.5246	0.0416	1	0	69		3.07351	0.3319	0.6681	0.0427	2	0	42
2.3867	0.2609	0.7391	0.0382	1	0	32		3.41448	0.4861	0.5139	0.0406	1	0	74		3.21448	0.4614	0.5386	0.0415	2	0	68		3.09642	0.3153	0.6847	0.0421	2	0	40
2.39295	0.2525	0.7475	0.0379	1	0	31		3.43392	0.4728	0.5272	0.0406	2	0	73		3.22142	0.4544	0.5456	0.0415	1	0	66		3.10406	0.307	0.693	0.0418	1	0	38
2.3992	0.244	0.756	0.0376	1	0	30		3.45615	0.4662	0.5338	0.0406	1	0	71		3.25615	0.4544	0.5456	0.0415	0	1	65		3.11517	0.2987	0.7013	0.0415	1	0	37
2.42003	0.2356	0.7644	0.0372	1	0	29		3.49781	0.4595	0.5405	0.0405	1	0	70		3.27698	0.4473	0.5527	0.0414	1	0	64		3.14573	0.2904	0.7096	0.0412	1	0	36
2.4492	0.2272	0.7728	0.0368	1	0	28		3.52837	0.4595	0.5405	0.0405	0	2	69		3.30476	0.4402	0.5598	0.0414	1	0	63		3.15684	0.2904	0.7096	0.0412	0	1	35
2.48253	0.2188	0.7812	0.0364	1	0	27		3.53948	0.4595	0.5405	0.0405	0	1	67		3.32837	0.4402	0.5598	0.0414	0	1	62		3.19851	0.2819	0.7181	0.0408	1	0	34
2.51795	0.2104	0.7896	0.036	1	0	26		3.55892	0.4525	0.5475	0.0405	1	0	66		3.37003	0.4258	0.5742	0.0413	2	0	61		3.24017	0.2563	0.7437	0.0397	3	0	33
2.53253	0.202	0.798	0.0355	1	0	25		3.59295	0.4386	0.5614	0.0405	2	0	65		3.38809	0.4186	0.5814	0.0412	1	0	59		3.26309	0.2477	0.7523	0.0393	1	0	30
2.54851	0.1851	0.8149	0.0345	2	0	24		3.6117	0.4386	0.5614	0.0405	0	2	63		3.4117	0.4114	0.5886	0.0411	1	0	58		3.29295	0.2306	0.7694	0.0384	2	0	29
2.5742	0.1767	0.8233	0.0339	1	0	22		3.63462	0.4314	0.5686	0.0404	1	0	61		3.46448	0.4041	0.5959	0.041	1	0	57		3.30476	0.2221	0.7779	0.0379	1	0	27
2.59017	0.1683	0.8317	0.0333	1	0	21		3.66448	0.417	0.583	0.0403	2	0	60		3.49503	0.4041	0.5959	0.041	0	1	56		3.32351	0.2136	0.7864	0.0374	1	0	26
2.60128	0.1599	0.8401	0.0327	1	0	20		3.68392	0.4099	0.5901	0.0403	1	0	58		3.50615	0.3968	0.6032	0.0409	1	0	55		3.38809	0.205	0.795	0.0369	1	0	25
2.60753	0.1515	0.8485	0.032	1	0	19		3.70615	0.4099	0.5901	0.0403	0	1	57		3.51309	0.3894	0.6106	0.0408	1	0	54		3.39573	0.1965	0.8035	0.0363	1	0	24
2.61587	0.1346	0.8654	0.0306	2	0	18		3.71795	0.3952	0.6048	0.0401	2	1	56		3.53809	0.3821	0.6179	0.0407	1	0	53		3.40684	0.1794	0.8206	0.0351	2	0	23
2.65753	0.1262	0.8738	0.0298	1	0	16		3.72559	0.3878	0.6122	0.0401	1	0	53		3.55476	0.3821	0.6179	0.0407	0	1	52		3.4374	0.1708	0.8292	0.0345	1	0	21
2.6992	0.1262	0.8738	0.0298	0	1	15		3.7367	0.3803	0.6197	0.04	1	0	52		3.57976	0.3671	0.6329	0.0405	2	0	51		3.44851	0.1623	0.8377	0.0338	1	0	20
2.73253	0.1262	0.8738	0.0298	0	1	14		3.74781	0.3728	0.6272	0.0399	1	0	51		3.59642	0.3521	0.6479	0.0402	2	0	49		3.54295	0.1623	0.8377	0.0338	0	1	19
2.74087	0.1165	0.8835	0.0291	1	0	13		3.82003	0.3654	0.6346	0.0398	1	0	50		3.62003	0.3446	0.6554	0.04	1	2	47		3.65684	0.1533	0.8467	0.0331	1	0	18
2.75684	0.1068	0.8932	0.0282	1	0	12		3.83115	0.3505	0.6495	0.0395	2	0	49		3.63115	0.329	0.671	0.0397	2	0	44		3.70962	0.1443	0.8557	0.0323	1	0	17
2.7742	0.0874	0.9126	0.0262	2	0	11		3.85059	0.3281	0.6719	0.0391	3	0	47		3.66309	0.3211	0.6789	0.0395	1	0	42		3.75128	0.1353	0.8647	0.0316	1	0	16
2.81587	0.0777	0.9223	0.025	1	0	9		3.8617	0.3206	0.6794	0.0389	1	0	44		3.76309	0.3055	0.6945	0.0391	2	0	41		3.78184	0.1262	0.8738	0.0307	1	0	15
2.85753	0.068	0.932	0.0237	1	0	8		3.88462	0.3057	0.6943	0.0385	2	0	43		3.7867	0.2976	0.7024	0.0389	1	0	39		3.82351	0.1082	0.8918	0.0289	2	0	14
2.86587	0.0583	0.9417	0.0222	1	0	7		3.89226	0.3057	0.6943	0.0385	0	1	41		3.80476	0.282	0.718	0.0384	2	1	38		3.85406	0.0992	0.9008	0.0278	1	0	12
2.89295	0.0485	0.9515	0.0205	1	0	6		3.90337	0.2981	0.7019	0.0383	1	0	40		3.82837	0.2739	0.7261	0.0381	1	0	35		3.90684	0.0902	0.9098	0.0267	1	0	11
3.00684	0.0388	0.9612	0.0186	1	0	5		3.95615	0.2828	0.7172	0.0378	2	0	39		3.84642	0.2659	0.7341	0.0378	1	0	34		3.9374	0.0721	0.9279	0.0242	2	0	10
3.11101	0.0291	0.9709	0.0163	1	0	4		3.96795	0.2752	0.7248	0.0375	1	0	37		3.88809	0.2578	0.7422	0.0375	1	0	33		3.97906	0.0721	0.9279	0.0242	0	1	8
3.23253	0.0194	0.9806	0.0134	1	0	3		3.97559	0.2675	0.7325	0.0373	1	0	36		3.91309	0.2497	0.7503	0.0372	1	0	32		4.0624	0.0618	0.9382	0.0228	1	0	7
3.3242	0.0097	0.9903	0.0096	1	0	2		3.99781	0.2599	0.7401	0.037	1	0	35		3.92281	0.2417	0.7583	0.0369	1	0	31		4.12628	0.0515	0.9485	0.0212	1	0	6
3.3367	0	1	0	1	0	1		4.01726	0.2522	0.7478	0.0367	1	0	34		3.99642	0.2336	0.7664	0.0365	1	0	30		4.19851	0.0412	0.9588	0.0193	1	0	5
								4.02837	0.2446	0.7554	0.0364	1	0	33		4.00615	0.2256	0.7744	0.0361	1	0	29		4.28184	0.0309	0.9691	0.017	1	0	4
								4.08115	0.2369	0.7631	0.036	1	0	32		4.09642	0.2175	0.7825	0.0357	1	0	28		4.38809	0.0206	0.9794	0.0141	1	0	3
								4.09295	0.2293	0.7707	0.0357	1	0	31		4.12142	0.2095	0.7905	0.0353	1	0	27		4.49017	0.0103	0.9897	0.0101	1	0	2
								4.1117	0.2217	0.7783	0.0353	1	0	30		4.13115	0.2014	0.7986	0.0349	1	0	26		4.67976	0	1	0	1	0	1
								4.13462	0.214	0.786	0.0349	1	0	29		4.13809	0.2014	0.7986	0.0349	0	1	25
								4.14226	0.2064	0.7936	0.0345	1	0	28		4.16309	0.193	0.807	0.0344	1	0	24
								4.18392	0.1987	0.8013	0.034	1	0	27		4.20337	0.1846	0.8154	0.0339	1	2	23
								4.21795	0.1987	0.8013	0.034	0	1	26		4.20476	0.1754	0.8246	0.0335	1	0	20
								4.24781	0.1987	0.8013	0.034	0	1	25		4.21448	0.1662	0.8338	0.0329	1	0	19
								4.30892	0.1904	0.8096	0.0336	1	0	24		4.24503	0.1569	0.8431	0.0324	1	0	18
								4.33115	0.1822	0.8178	0.0331	1	0	23		4.30476	0.1477	0.8523	0.0318	1	0	17
								4.35059	0.1822	0.8178	0.0331	0	1	22		4.32837	0.1385	0.8615	0.0311	1	0	16
								4.40337	0.1735	0.8265	0.0327	1	0	21		4.4117	0.1292	0.8708	0.0304	1	0	15
								4.45615	0.1475	0.8525	0.031	3	0	20		4.45476	0.12	0.88	0.0296	1	0	14
								4.51726	0.1388	0.8612	0.0304	1	0	17		4.49642	0.1108	0.8892	0.0287	1	0	13
								4.55892	0.1301	0.8699	0.0297	1	0	16		4.5367	0.1015	0.8985	0.0277	1	0	12
								4.58115	0.1214	0.8786	0.029	1	0	15		4.53809	0.0923	0.9077	0.0267	1	0	11
								4.60059	0.1128	0.8872	0.0282	1	0	14		4.57976	0.0831	0.9169	0.0256	1	0	10
								4.62281	0.1041	0.8959	0.0273	1	0	13		4.59642	0.0739	0.9261	0.0244	1	0	9
								4.63462	0.0954	0.9046	0.0264	1	0	12		4.63809	0.0646	0.9354	0.023	1	0	8
								4.64226	0.0867	0.9133	0.0254	1	0	11		4.6617	0.0554	0.9446	0.0215	1	0	7
								4.74781	0.0781	0.9219	0.0243	1	0	10		4.88809	0.0462	0.9538	0.0198	1	0	6
								4.91448	0.0694	0.9306	0.0231	1	0	9		5.30476	0.0369	0.9631	0.0179	1	0	5
								5.07003	0.0607	0.9393	0.0218	1	0	8		5.70337	0.0277	0.9723	0.0156	1	0	4
								5.09295	0.052	0.948	0.0203	1	0	7		5.7867	0.0185	0.9815	0.0128	1	0	3
								5.14226	0.0434	0.9566	0.0187	1	0	6		5.95476	0.0092	0.9908	0.0092	1	0	2
								5.16448	0.0347	0.9653	0.0168	1	0	5		6.37142	0	1	0	1	0	1
								5.30892	0.026	0.974	0.0147	1	0	4
								5.35059	0.0173	0.9827	0.0121	1	0	3
								5.64226	0.0087	0.9913	0.0086	1	0	2
								6.18392	0	1	0	1	0	1
