# Supplementary material for: Neuronal temperature perception induces specific defenses that enable C. elegans to cope with the enhanced reactivity of hydrogen peroxide at high temperature
Source: eLife. 2022 Oct 13;11:e78941. doi: 10.7554/eLife.78941 (PMC9635881; doi:10.7554/eLife.78941)
Supplement: Figure 2—source data 1. [file elife-78941-fig2-data1.xlsx]

## Sheet: Figure 2A
Figure 2A
wild type 20°C → 20°C								wild type 25°C → 25°C
Age at Death (d)	Survival	Failure	SurvStdErr	Number failed	Number censored	At Risk		Age at Death (d)	Survival	Failure	SurvStdErr	Number failed	Number censored	At Risk
0	1	0	0	0	0	145		0	1	0	0	0	0	86
1.05608	0.9931	0.0069	0.0069	1	0	145		0.5221	0.9884	0.0116	0.0116	1	0	86
1.09774	0.9862	0.0138	0.0097	1	0	144		0.65751	0.9767	0.0233	0.0163	1	0	85
1.11858	0.9793	0.0207	0.0118	1	0	143		0.73043	0.9651	0.0349	0.0198	1	0	84
1.13941	0.9724	0.0276	0.0136	1	0	142		0.74085	0.9535	0.0465	0.0227	1	0	83
1.14983	0.9517	0.0483	0.0178	3	0	141		0.7721	0.9419	0.0581	0.0252	1	0	82
1.17066	0.9448	0.0552	0.019	1	0	138		0.82418	0.9302	0.0698	0.0275	1	0	81
1.20191	0.931	0.069	0.021	2	0	137		0.8346	0.9186	0.0814	0.0295	1	0	80
1.22274	0.9241	0.0759	0.022	1	0	135		0.85543	0.8953	0.1047	0.033	2	0	79
1.26441	0.9103	0.0897	0.0237	2	0	134		0.87626	0.8837	0.1163	0.0346	1	0	77
1.27483	0.8966	0.1034	0.0253	2	0	132		0.88668	0.8721	0.1279	0.036	1	0	76
1.29566	0.8828	0.1172	0.0267	2	0	130		0.8971	0.8488	0.1512	0.0386	2	0	75
1.31649	0.8552	0.1448	0.0292	4	0	128		0.90751	0.8256	0.1744	0.0409	2	0	73
1.33733	0.8414	0.1586	0.0303	2	0	124		0.92835	0.814	0.186	0.042	1	0	71
1.34774	0.7931	0.2069	0.0336	7	0	122		0.93876	0.8023	0.1977	0.0429	1	0	70
1.35816	0.7724	0.2276	0.0348	3	14	115		0.9596	0.7907	0.2093	0.0439	1	0	69
1.36858	0.7567	0.2433	0.0358	2	0	98		0.97001	0.7791	0.2209	0.0447	1	0	68
1.37899	0.7488	0.2512	0.0363	1	0	96		0.98043	0.7442	0.2558	0.047	3	0	67
1.38941	0.7409	0.2591	0.0368	1	0	95		0.99085	0.7326	0.2674	0.0477	1	0	64
1.39983	0.7251	0.2749	0.0377	2	0	94		1.00126	0.686	0.314	0.05	4	0	63
1.43108	0.7015	0.2985	0.0388	3	0	92		1.03251	0.6744	0.3256	0.0505	1	0	59
1.44149	0.6936	0.3064	0.0392	1	0	89		1.04293	0.6628	0.3372	0.051	1	0	58
1.45191	0.6857	0.3143	0.0395	1	0	88		1.05334	0.6395	0.3605	0.0518	2	0	57
1.46233	0.67	0.33	0.0402	2	0	87		1.06376	0.6279	0.3721	0.0521	1	0	55
1.47274	0.6384	0.3616	0.0412	4	0	85		1.07418	0.593	0.407	0.053	3	0	54
1.48316	0.6305	0.3695	0.0415	1	0	81		1.08459	0.5814	0.4186	0.0532	1	0	51
1.49358	0.6148	0.3852	0.0419	2	0	80		1.10543	0.5465	0.4535	0.0537	3	0	50
1.50399	0.5911	0.4089	0.0425	3	0	78		1.11584	0.5349	0.4651	0.0538	1	0	47
1.51441	0.5833	0.4167	0.0426	1	0	75		1.12626	0.5233	0.4767	0.0539	1	0	46
1.52483	0.5754	0.4246	0.0428	1	0	74		1.13668	0.5116	0.4884	0.0539	1	0	45
1.53524	0.5517	0.4483	0.0431	3	0	73		1.14709	0.4651	0.5349	0.0538	4	0	44
1.54566	0.536	0.464	0.0433	2	0	70		1.15751	0.4419	0.5581	0.0536	2	0	40
1.55608	0.5281	0.4719	0.0434	1	0	68		1.16793	0.4302	0.5698	0.0534	1	0	38
1.56649	0.5044	0.4956	0.0435	3	0	67		1.17834	0.3837	0.6163	0.0524	4	0	37
1.57691	0.4808	0.5192	0.0436	3	0	64		1.18876	0.3605	0.6395	0.0518	2	0	33
1.58733	0.465	0.535	0.0436	2	0	61		1.19918	0.3256	0.6744	0.0505	3	0	31
1.59774	0.4414	0.5586	0.0434	3	0	59		1.20959	0.3023	0.6977	0.0495	2	0	28
1.61858	0.4256	0.5744	0.0433	2	0	56		1.22001	0.2907	0.7093	0.049	1	0	26
1.62899	0.4177	0.5823	0.0432	1	0	54		1.23043	0.2791	0.7209	0.0484	1	0	25
1.63941	0.3862	0.6138	0.0427	4	0	53		1.24084	0.2674	0.7326	0.0477	1	0	24
1.64983	0.3704	0.6296	0.0424	2	0	49		1.26168	0.2558	0.7442	0.047	1	0	23
1.66024	0.3626	0.6374	0.0422	1	0	47		1.27209	0.2326	0.7674	0.0456	2	0	22
1.67066	0.3389	0.6611	0.0416	3	0	46		1.28251	0.2093	0.7907	0.0439	2	0	20
1.68108	0.3232	0.6768	0.0412	2	0	43		1.29293	0.186	0.814	0.042	2	0	18
1.69149	0.3153	0.6847	0.0409	1	0	41		1.31376	0.1628	0.8372	0.0398	2	0	16
1.70191	0.2995	0.7005	0.0403	2	0	40		1.33459	0.1512	0.8488	0.0386	1	0	14
1.71233	0.2916	0.7084	0.04	1	0	38		1.34501	0.1279	0.8721	0.036	2	0	13
1.73316	0.2837	0.7163	0.0397	1	0	37		1.35543	0.1163	0.8837	0.0346	1	0	11
1.74358	0.268	0.732	0.0391	2	0	36		1.37626	0.093	0.907	0.0313	2	0	10
1.75399	0.2601	0.7399	0.0387	1	0	34		1.39709	0.0814	0.9186	0.0295	1	0	8
1.77483	0.2522	0.7478	0.0383	1	0	33		1.40751	0.0698	0.9302	0.0275	1	0	7
1.79566	0.2365	0.7635	0.0375	2	0	32		1.47001	0.0581	0.9419	0.0252	1	0	6
1.80608	0.2128	0.7872	0.0362	3	0	30		1.48043	0.0349	0.9651	0.0198	2	0	5
1.81649	0.1892	0.8108	0.0346	3	0	27		1.50126	0.0116	0.9884	0.0116	2	0	3
1.82691	0.1813	0.8187	0.0341	1	0	24		1.61584	0	1	0	1	0	1
1.84774	0.1576	0.8424	0.0322	3	0	23
1.86858	0.1419	0.8581	0.0309	2	0	20
1.88941	0.134	0.866	0.0302	1	0	18
1.91024	0.1261	0.8739	0.0294	1	0	17
1.94149	0.1103	0.8897	0.0278	2	0	16
1.95191	0.1025	0.8975	0.0269	1	0	14
1.97274	0.0946	0.9054	0.0259	1	0	13
2.00399	0.0867	0.9133	0.0249	1	0	12
2.01441	0.0788	0.9212	0.0239	1	0	11
2.02483	0.0709	0.9291	0.0228	1	0	10
2.08733	0.0631	0.9369	0.0216	1	0	9
2.12899	0.0552	0.9448	0.0202	1	0	8
2.14983	0.0473	0.9527	0.0188	1	0	7
2.16024	0.0394	0.9606	0.0173	1	0	6
2.17066	0.0315	0.9685	0.0155	1	0	5
2.26441	0.0236	0.9764	0.0135	1	0	4
2.27483	0.0158	0.9842	0.0111	1	0	3
2.28524	0.0079	0.9921	0.0078	1	0	2
2.30608	0	1	0	1	0	1

## Sheet: Figure 2C
Figure 2C
wild type 20°C → 25°C								wild type 25°C → 25°C
Age at Death (d)	Survival	Failure	SurvStdErr	Number failed	Number censored	At Risk		Age at Death (d)	Survival	Failure	SurvStdErr	Number failed	Number censored	At Risk
0	1	0	0	0	0	140		0	1	0	0	0	0	65
0.37798	0.9929	0.0071	0.0071	1	0	140		0.56895	0.9692	0.0308	0.0214	2	0	65
0.38909	0.9857	0.0143	0.01	1	0	139		0.69395	0.9538	0.0462	0.026	1	0	63
0.40089	0.9786	0.0214	0.0122	1	0	138		0.7127	0.9231	0.0769	0.0331	2	0	62
0.41964	0.9714	0.0286	0.0141	1	0	137		0.75436	0.9077	0.0923	0.0359	1	0	60
0.46131	0.9643	0.0357	0.0157	1	0	136		0.76617	0.8923	0.1077	0.0384	1	0	59
0.47242	0.9214	0.0786	0.0227	6	0	135		0.79603	0.8769	0.1231	0.0407	1	0	58
0.51409	0.9071	0.0929	0.0245	2	0	129		0.8495	0.8615	0.1385	0.0428	1	0	57
0.54464	0.9	0.1	0.0254	1	0	127		0.86061	0.8462	0.1538	0.0448	1	0	56
0.55575	0.8643	0.1357	0.0289	5	0	126		0.87936	0.8154	0.1846	0.0481	2	0	55
0.56756	0.8429	0.1571	0.0308	3	0	121		0.90228	0.7846	0.2154	0.051	2	0	53
0.5745	0.8286	0.1714	0.0319	2	0	118		0.92103	0.7231	0.2769	0.0555	4	0	51
0.58631	0.7929	0.2071	0.0343	5	0	116		0.93284	0.6769	0.3231	0.058	3	0	47
0.59742	0.7571	0.2429	0.0362	5	0	111		0.9627	0.6615	0.3385	0.0587	1	0	44
0.60923	0.7214	0.2786	0.0379	5	0	106		0.9745	0.6462	0.3538	0.0593	1	0	43
0.61617	0.7071	0.2929	0.0385	2	0	101		0.98561	0.6	0.4	0.0608	3	0	42
0.62798	0.6786	0.3214	0.0395	4	0	99		1.00436	0.5846	0.4154	0.0611	1	0	39
0.63909	0.65	0.35	0.0403	4	0	95		1.01617	0.5231	0.4769	0.062	4	0	38
0.65089	0.5786	0.4214	0.0417	10	0	91		1.02728	0.5077	0.4923	0.062	1	0	34
0.65784	0.5714	0.4286	0.0418	1	0	81		1.04603	0.4615	0.5385	0.0618	3	0	33
0.66964	0.5357	0.4643	0.0421	5	0	80		1.05784	0.4462	0.5538	0.0617	1	0	30
0.68075	0.5214	0.4786	0.0422	2	0	75		1.0995	0.4308	0.5692	0.0614	1	0	29
0.69256	0.4714	0.5286	0.0422	7	0	73		1.11061	0.3692	0.6308	0.0599	4	0	28
0.6995	0.4143	0.5857	0.0416	8	0	66		1.12936	0.3385	0.6615	0.0587	2	0	24
0.71131	0.3429	0.6571	0.0401	10	0	58		1.14117	0.2923	0.7077	0.0564	3	0	22
0.72242	0.3214	0.6786	0.0395	3	0	48		1.15228	0.2154	0.7846	0.051	5	0	19
0.73423	0.2857	0.7143	0.0382	5	0	45		1.17103	0.1846	0.8154	0.0481	2	0	14
0.74117	0.2429	0.7571	0.0362	6	0	40		1.18284	0.1538	0.8462	0.0448	2	0	12
0.75298	0.2071	0.7929	0.0343	5	0	34		1.2127	0.1385	0.8615	0.0428	1	0	10
0.76409	0.1929	0.8071	0.0333	2	0	29		1.29603	0.1231	0.8769	0.0407	1	0	9
0.77589	0.1714	0.8286	0.0319	3	0	27		1.31895	0.1077	0.8923	0.0384	1	0	8
0.78284	0.1357	0.8643	0.0289	5	0	24		1.3377	0.0923	0.9077	0.0359	1	0	7
0.79464	0.1214	0.8786	0.0276	2	0	19		1.3495	0.0769	0.9231	0.0331	1	0	6
0.80575	0.1143	0.8857	0.0269	1	0	17		1.37936	0.0615	0.9385	0.0298	1	0	5
0.81756	0.1071	0.8929	0.0261	1	0	16		1.39117	0.0462	0.9538	0.026	1	0	4
0.8245	0.05	0.95	0.0184	8	0	15		1.4745	0.0154	0.9846	0.0153	2	0	3
0.87798	0.0429	0.9571	0.0171	1	0	7		1.61061	0	1	0	1	0	1
0.90784	0.0286	0.9714	0.0141	2	0	6
0.9495	0.0143	0.9857	0.01	2	0	4
1.02589	0.0071	0.9929	0.0071	1	0	2
1.03284	0	1	0	1	0	1

## Sheet: Figure 2D
Figure 2D
wild type 20°C → 20°C								wild type 25°C → 20°C
Age at Death (d)	Survival	Failure	SurvStdErr	Number failed	Number censored	At Risk		Age at Death (d)	Survival	Failure	SurvStdErr	Number failed	Number censored	At Risk
0	1	0	0	0	0	146		0	1	0	0	0	0	131
0.9692	0.9863	0.0137	0.0096	2	0	146		0.93795	0.9924	0.0076	0.0076	1	0	131
1.05253	0.9795	0.0205	0.0117	1	0	144		1.01087	0.9847	0.0153	0.0107	1	0	130
1.0942	0.9726	0.0274	0.0135	1	0	143		1.05253	0.9771	0.0229	0.0131	1	0	129
1.10462	0.9658	0.0342	0.0151	1	0	142		1.16712	0.9695	0.0305	0.015	1	0	128
1.12545	0.9589	0.0411	0.0164	1	0	141		1.17753	0.9618	0.0382	0.0167	1	0	127
1.13587	0.9521	0.0479	0.0177	1	0	140		1.22962	0.9542	0.0458	0.0183	1	0	126
1.14628	0.9452	0.0548	0.0188	1	0	139		1.25045	0.9466	0.0534	0.0196	1	0	125
1.17753	0.9384	0.0616	0.0199	1	0	138		1.26087	0.9389	0.0611	0.0209	1	0	124
1.18795	0.9247	0.0753	0.0218	2	0	137		1.31295	0.9313	0.0687	0.0221	1	0	123
1.19837	0.911	0.089	0.0236	2	0	135		1.37545	0.9237	0.0763	0.0232	1	0	122
1.2192	0.8973	0.1027	0.0251	2	0	133		1.4067	0.916	0.084	0.0242	1	0	121
1.22962	0.8836	0.1164	0.0265	2	0	131		1.44837	0.9084	0.0916	0.0252	1	0	120
1.24003	0.8767	0.1233	0.0272	1	0	129		1.4692	0.9008	0.0992	0.0261	1	0	119
1.25045	0.8699	0.1301	0.0278	1	0	128		1.49003	0.8931	0.1069	0.027	1	0	118
1.26087	0.8562	0.1438	0.029	2	0	127		1.5317	0.8855	0.1145	0.0278	1	0	117
1.27128	0.8493	0.1507	0.0296	1	0	125		1.55253	0.8779	0.1221	0.0286	1	0	116
1.2817	0.8151	0.1849	0.0321	5	0	124		1.58378	0.8702	0.1298	0.0294	1	0	115
1.29212	0.8014	0.1986	0.033	2	0	119		1.5942	0.8626	0.1374	0.0301	1	0	114
1.30253	0.774	0.226	0.0346	4	0	117		1.61503	0.8473	0.1527	0.0314	2	0	113
1.31295	0.7534	0.2466	0.0357	3	0	113		1.62545	0.8397	0.1603	0.0321	1	0	111
1.32337	0.7329	0.2671	0.0366	3	0	110		1.63587	0.8321	0.1679	0.0327	1	0	110
1.33378	0.726	0.274	0.0369	1	0	107		1.6567	0.8244	0.1756	0.0332	1	0	109
1.3442	0.7055	0.2945	0.0377	3	0	106		1.66712	0.8168	0.1832	0.0338	1	0	108
1.35462	0.6986	0.3014	0.038	1	0	103		1.67753	0.7939	0.2061	0.0353	3	0	107
1.36503	0.6918	0.3082	0.0382	1	0	102		1.68795	0.7863	0.2137	0.0358	1	0	104
1.37545	0.6781	0.3219	0.0387	2	0	101		1.70878	0.771	0.229	0.0367	2	0	103
1.38587	0.6575	0.3425	0.0393	3	0	99		1.72962	0.7481	0.2519	0.0379	3	0	101
1.39628	0.6027	0.3973	0.0405	8	0	96		1.74003	0.7405	0.2595	0.0383	1	0	98
1.4067	0.5959	0.4041	0.0406	1	0	88		1.75045	0.7328	0.2672	0.0387	1	0	97
1.41712	0.589	0.411	0.0407	1	0	87		1.7817	0.7176	0.2824	0.0393	2	0	96
1.42753	0.5822	0.4178	0.0408	1	0	86		1.81295	0.7023	0.2977	0.04	2	0	94
1.43795	0.5753	0.4247	0.0409	1	0	85		1.83378	0.6947	0.3053	0.0402	1	0	92
1.44837	0.5685	0.4315	0.041	1	0	84		1.87545	0.687	0.313	0.0405	1	0	91
1.4692	0.5616	0.4384	0.0411	1	0	83		1.89628	0.6794	0.3206	0.0408	1	0	90
1.47962	0.5411	0.4589	0.0412	3	0	82		1.9067	0.6718	0.3282	0.041	1	0	89
1.49003	0.5342	0.4658	0.0413	1	0	79		1.92753	0.6641	0.3359	0.0413	1	0	88
1.50045	0.5205	0.4795	0.0413	2	0	78		1.95878	0.6565	0.3435	0.0415	1	0	87
1.51087	0.5068	0.4932	0.0414	2	0	76		1.99003	0.6489	0.3511	0.0417	1	0	86
1.52128	0.4932	0.5068	0.0414	2	0	74		2.00045	0.6412	0.3588	0.0419	1	0	85
1.5317	0.4863	0.5137	0.0414	1	0	72		2.0317	0.6336	0.3664	0.0421	1	0	84
1.54212	0.4795	0.5205	0.0413	1	0	71		2.07337	0.626	0.374	0.0423	1	0	83
1.55253	0.4726	0.5274	0.0413	1	0	70		2.08378	0.6183	0.3817	0.0424	1	0	82
1.56295	0.4658	0.5342	0.0413	1	0	69		2.10462	0.6107	0.3893	0.0426	1	0	81
1.57337	0.4521	0.5479	0.0412	2	0	68		2.11503	0.6031	0.3969	0.0427	1	0	80
1.58378	0.4384	0.5616	0.0411	2	0	66		2.12545	0.5878	0.4122	0.043	2	0	79
1.5942	0.4247	0.5753	0.0409	2	0	64		2.13587	0.5725	0.4275	0.0432	2	0	77
1.61503	0.411	0.589	0.0407	2	0	62		2.14628	0.5573	0.4427	0.0434	2	0	75
1.62545	0.3973	0.6027	0.0405	2	0	60		2.1567	0.5496	0.4504	0.0435	1	0	73
1.63587	0.3836	0.6164	0.0402	2	0	58		2.16712	0.542	0.458	0.0435	1	0	72
1.6567	0.3699	0.6301	0.04	2	0	56		2.18795	0.5344	0.4656	0.0436	1	0	71
1.66712	0.3425	0.6575	0.0393	4	0	54		2.20878	0.5267	0.4733	0.0436	1	0	70
1.67753	0.3356	0.6644	0.0391	1	0	50		2.2192	0.5115	0.4885	0.0437	2	0	69
1.68795	0.3219	0.6781	0.0387	2	0	49		2.22962	0.5038	0.4962	0.0437	1	0	67
1.70878	0.2877	0.7123	0.0375	5	0	47		2.25045	0.4962	0.5038	0.0437	1	0	66
1.7192	0.274	0.726	0.0369	2	0	42		2.27128	0.4885	0.5115	0.0437	1	0	65
1.74003	0.2603	0.7397	0.0363	2	0	40		2.29212	0.4809	0.5191	0.0437	1	0	64
1.75045	0.2534	0.7466	0.036	1	0	38		2.32337	0.458	0.542	0.0435	3	0	63
1.76087	0.2466	0.7534	0.0357	1	0	37		2.3442	0.4504	0.5496	0.0435	1	0	60
1.77128	0.2397	0.7603	0.0353	1	0	36		2.36503	0.4427	0.5573	0.0434	1	0	59
1.7817	0.226	0.774	0.0346	2	0	35		2.41712	0.4351	0.5649	0.0433	1	0	58
1.79212	0.2123	0.7877	0.0338	2	0	33		2.43795	0.4275	0.5725	0.0432	1	0	57
1.82337	0.2055	0.7945	0.0334	1	0	31		2.4692	0.4122	0.5878	0.043	2	0	56
1.83378	0.1986	0.8014	0.033	1	0	30		2.50045	0.4046	0.5954	0.0429	1	0	54
1.8442	0.1849	0.8151	0.0321	2	0	29		2.5317	0.3969	0.6031	0.0427	1	0	53
1.85462	0.1507	0.8493	0.0296	5	0	27		2.56295	0.3893	0.6107	0.0426	1	0	52
1.86503	0.137	0.863	0.0285	2	0	22		2.63587	0.3664	0.6336	0.0421	3	0	51
1.87545	0.1164	0.8836	0.0265	3	0	20		2.64628	0.3588	0.6412	0.0419	1	0	48
1.9067	0.1027	0.8973	0.0251	2	0	17		2.67753	0.3511	0.6489	0.0417	1	0	47
1.91712	0.0959	0.9041	0.0244	1	0	15		2.69837	0.3435	0.6565	0.0415	1	0	46
1.94837	0.089	0.911	0.0236	1	0	14		2.72962	0.3359	0.6641	0.0413	1	0	45
2.02128	0.0822	0.9178	0.0227	1	0	13		2.75045	0.3282	0.6718	0.041	1	0	44
2.0317	0.0753	0.9247	0.0218	1	0	12		2.81295	0.3206	0.6794	0.0408	1	0	43
2.04212	0.0685	0.9315	0.0209	1	0	11		2.87545	0.313	0.687	0.0405	1	0	42
2.08378	0.0548	0.9452	0.0188	2	0	10		2.92753	0.3053	0.6947	0.0402	1	0	41
2.0942	0.0479	0.9521	0.0177	1	0	8		2.93795	0.2977	0.7023	0.04	1	0	40
2.1567	0.0411	0.9589	0.0164	1	0	7		2.94837	0.2901	0.7099	0.0396	1	0	39
2.17753	0.0342	0.9658	0.0151	1	0	6		2.95878	0.2824	0.7176	0.0393	1	0	38
2.22962	0.0274	0.9726	0.0135	1	0	5		2.9692	0.2748	0.7252	0.039	1	0	37
2.36503	0.0205	0.9795	0.0117	1	0	4		3.00045	0.2672	0.7328	0.0387	1	0	36
2.58378	0.0137	0.9863	0.0096	1	0	3		3.05253	0.2595	0.7405	0.0383	1	0	35
3.01087	0.0068	0.9932	0.0068	1	0	2		3.07337	0.2519	0.7481	0.0379	1	0	34
3.74003	0	1	0	1	0	1		3.0942	0.2443	0.7557	0.0375	1	0	33
								3.11503	0.229	0.771	0.0367	2	0	32
								3.16712	0.2214	0.7786	0.0363	1	0	30
								3.18795	0.2137	0.7863	0.0358	1	0	29
								3.32337	0.2061	0.7939	0.0353	1	0	28
								3.3442	0.1985	0.8015	0.0348	1	0	27
								3.35462	0.1908	0.8092	0.0343	1	0	26
								3.36503	0.1832	0.8168	0.0338	1	0	25
								3.37545	0.1756	0.8244	0.0332	1	0	24
								3.39628	0.1679	0.8321	0.0327	1	0	23
								3.43795	0.1603	0.8397	0.0321	1	0	22
								3.44837	0.145	0.855	0.0308	2	0	21
								3.47962	0.1374	0.8626	0.0301	1	0	19
								3.52128	0.1298	0.8702	0.0294	1	0	18
								3.5317	0.1221	0.8779	0.0286	1	0	17
								3.70878	0.1069	0.8931	0.027	2	0	16
								3.75045	0.0992	0.9008	0.0261	1	0	14
								3.83378	0.0916	0.9084	0.0252	1	0	13
								3.9067	0.084	0.916	0.0242	1	0	12
								3.91712	0.0611	0.9389	0.0209	3	0	11
								3.95878	0.0534	0.9466	0.0196	1	0	8
								3.97962	0.0458	0.9542	0.0183	1	0	7
								4.0317	0.0382	0.9618	0.0167	1	0	6
								4.32337	0.0305	0.9695	0.015	1	0	5
								4.69837	0.0229	0.9771	0.0131	1	0	4
								5.00045	0.0153	0.9847	0.0107	1	0	3
								5.17753	0	1	0	2	0	2
