# Supplementary material for: Neuronal temperature perception induces specific defenses that enable C. elegans to cope with the enhanced reactivity of hydrogen peroxide at high temperature
Source: eLife. 2022 Oct 13;11:e78941. doi: 10.7554/eLife.78941 (PMC9635881; doi:10.7554/eLife.78941)
Supplement: Figure 2—source data 2. [file elife-78941-fig2-data2.xlsx]

## Sheet: Figure 2
Figure 2B
Worm genotype	Temperature	Treatment	Alive	Dead
wild type	20°C	control	218	0
wild type	25°C	control	216	0
wild type	20°C	E. faecium supernatant	97	188
wild type	25°C	E. faecium supernatant	37	213
Figure 2E
Worm genotype	Temperature	Treatment	Alive	Dead
wild type	20°C → 20°C	control	174	0
wild type	25°C → 20°C	control	136	0
wild type	20°C → 20°C	E. faecium supernatant	76	131
wild type	25°C → 20°C	E. faecium supernatant	157	60
