# Supplementary material for: Neuronal temperature perception induces specific defenses that enable C. elegans to cope with the enhanced reactivity of hydrogen peroxide at high temperature
Source: eLife. 2022 Oct 13;11:e78941. doi: 10.7554/eLife.78941 (PMC9635881; doi:10.7554/eLife.78941)
Supplement: Figure 3—figure supplement 1—source data 1. [file elife-78941-fig3-figsupp1-data1.xlsx]

## Sheet: Figure 3S1
Figure 3S1
wild type 20°C								AFD ablated 20°C
Age at Death (d)	Survival	Failure	SurvStdErr	Number failed	Number censored	At Risk		Age at Death (d)	Survival	Failure	SurvStdErr	Number failed	Number censored	At Risk
0	1	0	0	0	0	130		0	1	0	0	0	0	114
0.21597	1	0	0	0	4	130		0.03368	0.9912	0.0088	0.0087	1	0	114
0.32014	1	0	0	0	3	126		0.03889	0.9912	0.0088	0.0087	0	3	113
0.35139	0.9837	0.0163	0.0114	2	0	123		0.15347	0.9912	0.0088	0.0087	0	2	110
0.36181	0.9756	0.0244	0.0139	1	0	121		0.18472	0.9912	0.0088	0.0087	0	2	108
0.40347	0.9675	0.0325	0.016	1	0	120		0.43472	0.9912	0.0088	0.0087	0	1	106
0.41389	0.9593	0.0407	0.0178	1	0	119		0.52847	0.9912	0.0088	0.0087	0	3	105
0.43472	0.9512	0.0488	0.0194	1	3	118		0.59097	0.9912	0.0088	0.0087	0	4	102
0.45556	0.9429	0.0571	0.021	1	0	114		0.71597	0.9912	0.0088	0.0087	0	2	98
0.46597	0.9345	0.0655	0.0224	1	0	113		0.73681	0.9809	0.0191	0.0134	1	0	96
0.48681	0.9262	0.0738	0.0237	1	0	112		1.01806	0.9706	0.0294	0.0168	1	0	95
0.49722	0.9095	0.0905	0.026	2	0	111		1.08056	0.9603	0.0397	0.0195	1	0	94
0.50764	0.9012	0.0988	0.0271	1	0	109		1.09097	0.9603	0.0397	0.0195	0	1	93
0.51806	0.8928	0.1072	0.0281	1	0	108		1.14306	0.9603	0.0397	0.0195	0	2	92
0.52847	0.8678	0.1322	0.0308	3	0	107		1.19514	0.9496	0.0504	0.022	1	0	90
0.53889	0.8511	0.1489	0.0324	2	0	104		1.22639	0.9496	0.0504	0.022	0	1	89
0.54931	0.8344	0.1656	0.0338	2	0	102		1.23681	0.928	0.072	0.0263	2	0	88
0.55972	0.7677	0.2323	0.0385	8	0	100		1.28889	0.928	0.072	0.0263	0	2	86
0.57014	0.751	0.249	0.0394	2	0	92		1.29931	0.9059	0.0941	0.03	2	0	84
0.58056	0.7343	0.2657	0.0403	2	0	90		1.33056	0.8949	0.1051	0.0316	1	0	82
0.59097	0.7176	0.2824	0.0411	2	0	88		1.36181	0.8838	0.1162	0.033	1	0	81
0.60139	0.7009	0.2991	0.0418	2	0	86		1.38264	0.8728	0.1272	0.0344	1	0	80
0.62222	0.6675	0.3325	0.043	4	0	84		1.41389	0.8617	0.1383	0.0357	1	0	79
0.63264	0.6175	0.3825	0.0443	6	0	80		1.42431	0.8507	0.1493	0.0369	1	0	78
0.64306	0.6008	0.3992	0.0447	2	0	74		1.44514	0.8286	0.1714	0.0391	2	0	77
0.65347	0.5841	0.4159	0.045	2	0	72		1.45556	0.7954	0.2046	0.042	3	0	75
0.66389	0.5591	0.4409	0.0453	3	0	70		1.50764	0.7844	0.2156	0.0428	1	0	72
0.67431	0.5507	0.4493	0.0454	1	0	67		1.51806	0.7733	0.2267	0.0436	1	0	71
0.68472	0.5424	0.4576	0.0455	1	0	66		1.54931	0.7623	0.2377	0.0444	1	0	70
0.69514	0.5257	0.4743	0.0456	2	0	65		1.58056	0.7512	0.2488	0.0451	1	0	69
0.70556	0.509	0.491	0.0456	2	0	63		1.60139	0.7291	0.2709	0.0464	2	0	68
0.71597	0.5006	0.4994	0.0456	1	0	61		1.61181	0.7181	0.2819	0.047	1	0	66
0.72639	0.484	0.516	0.0456	2	0	60		1.66389	0.707	0.293	0.0476	1	0	65
0.73681	0.4673	0.5327	0.0455	2	0	58		1.67431	0.696	0.304	0.0481	1	0	64
0.74722	0.4589	0.5411	0.0455	1	0	56		1.73681	0.6739	0.3261	0.049	2	0	63
0.75764	0.4422	0.5578	0.0453	2	0	55		1.75764	0.6629	0.3371	0.0494	1	0	61
0.76806	0.4255	0.5745	0.0451	2	0	53		1.76806	0.6408	0.3592	0.0502	2	0	60
0.79931	0.4005	0.5995	0.0447	3	0	51		1.78889	0.6297	0.3703	0.0505	1	0	58
0.80972	0.3755	0.6245	0.0442	3	0	48		1.79931	0.6187	0.3813	0.0508	1	0	57
0.82014	0.3588	0.6412	0.0438	2	0	45		1.85139	0.6076	0.3924	0.0511	1	0	56
0.83056	0.3504	0.6496	0.0436	1	0	43		1.88264	0.5966	0.4034	0.0514	1	0	55
0.84097	0.3171	0.6829	0.0425	4	0	42		1.97639	0.5745	0.4255	0.0518	2	0	54
0.85139	0.3087	0.6913	0.0422	1	0	38		1.98681	0.5082	0.4918	0.0524	6	0	52
0.86181	0.2837	0.7163	0.0412	3	0	37		2.01806	0.4861	0.5139	0.0524	2	0	46
0.87222	0.267	0.733	0.0404	2	0	34		2.07014	0.475	0.525	0.0524	1	0	44
0.88264	0.2587	0.7413	0.04	1	0	32		2.08056	0.464	0.536	0.0523	1	0	43
0.89306	0.2503	0.7497	0.0396	1	0	31		2.11181	0.4419	0.5581	0.0521	2	0	42
0.90347	0.2336	0.7664	0.0386	2	0	30		2.14306	0.4309	0.5691	0.052	1	0	40
0.92431	0.2086	0.7914	0.0371	3	0	28		2.20556	0.3977	0.6023	0.0514	3	0	39
0.93472	0.2003	0.7997	0.0365	1	0	25		2.25764	0.3867	0.6133	0.0511	1	0	36
0.96597	0.1919	0.8081	0.036	1	0	24		2.28889	0.3756	0.6244	0.0508	1	0	35
0.98681	0.1836	0.8164	0.0354	1	0	23		2.29931	0.3646	0.6354	0.0505	1	0	34
0.99722	0.1752	0.8248	0.0347	1	2	22		2.33056	0.3535	0.6465	0.0502	1	0	33
1.01806	0.1476	0.8524	0.0327	3	0	19		2.39306	0.3314	0.6686	0.0494	2	0	32
1.02847	0.1291	0.8709	0.0311	2	0	16		2.42431	0.3204	0.6796	0.049	1	0	30
1.09097	0.1199	0.8801	0.0302	1	0	14		2.48681	0.3093	0.6907	0.0485	1	0	29
1.10139	0.1107	0.8893	0.0293	1	0	13		2.54931	0.2983	0.7017	0.048	1	0	28
1.15347	0.0922	0.9078	0.0271	2	0	12		2.57014	0.2762	0.7238	0.047	2	0	27
1.20556	0.083	0.917	0.0259	1	0	10		2.61181	0.2651	0.7349	0.0464	1	0	25
1.21597	0.0738	0.9262	0.0247	1	0	9		2.64306	0.2541	0.7459	0.0457	1	0	24
1.24722	0.0646	0.9354	0.0232	1	0	8		2.75764	0.243	0.757	0.045	1	0	23
1.27847	0.0553	0.9447	0.0217	1	0	7		2.76806	0.221	0.779	0.0436	2	0	22
1.34097	0.0461	0.9539	0.0199	1	0	6		2.86181	0.1989	0.8011	0.0419	2	0	20
1.52847	0.0277	0.9723	0.0157	2	0	5		2.89306	0.1878	0.8122	0.041	1	0	18
1.54931	0.0184	0.9816	0.0129	1	0	3		2.98681	0.1768	0.8232	0.0401	1	0	17
1.55972	0.0092	0.9908	0.0092	1	0	2		3.01806	0.1657	0.8343	0.0391	1	0	16
2.25764	0	1	0	1	0	1		3.04931	0.1547	0.8453	0.038	1	0	15
								3.07014	0.1436	0.8564	0.0368	1	0	14
								3.14306	0.1326	0.8674	0.0356	1	0	13
								3.20556	0.1215	0.8785	0.0343	1	0	12
								3.29931	0.1105	0.8895	0.0329	1	0	11
								3.41389	0.0994	0.9006	0.0314	1	0	10
								3.42431	0.0884	0.9116	0.0298	1	0	9
								3.83056	0.0773	0.9227	0.0281	1	0	8
								3.88264	0.0663	0.9337	0.0261	1	0	7
								4.17431	0.0552	0.9448	0.024	1	0	6
								4.23681	0.0442	0.9558	0.0216	1	0	5
								4.33056	0.0331	0.9669	0.0188	1	0	4
								4.48681	0.0221	0.9779	0.0154	1	0	3
								4.76806	0.011	0.989	0.011	1	0	2
								4.83056	0	1	0	1	0	1
