# Supplementary material for: Neuronal temperature perception induces specific defenses that enable C. elegans to cope with the enhanced reactivity of hydrogen peroxide at high temperature
Source: eLife. 2022 Oct 13;11:e78941. doi: 10.7554/eLife.78941 (PMC9635881; doi:10.7554/eLife.78941)
Supplement: Figure 3—source data 1. [file elife-78941-fig3-data1.xlsx]

## Sheet: Figure 3B
Figure 3B
wild type 20°C								tax-4(p678) 20°C
Age at Death (d)	Survival	Failure	SurvStdErr	Number failed	Number censored	At Risk		Age at Death (d)	Survival	Failure	SurvStdErr	Number failed	Number censored	At Risk
0	1	0	0	0	0	134		0	1	0	0	0	0	100
1.05186	0.9925	0.0075	0.0074	1	0	134		2.7602	0.99	0.01	0.0099	1	0	100
1.14561	0.9851	0.0149	0.0105	1	0	133		2.8852	0.98	0.02	0.014	1	0	99
1.15603	0.9776	0.0224	0.0128	1	0	132		3.3227	0.97	0.03	0.0171	1	0	98
1.16645	0.9701	0.0299	0.0147	1	0	131		3.41645	0.96	0.04	0.0196	1	0	97
1.18728	0.9627	0.0373	0.0164	1	0	130		3.4477	0.95	0.05	0.0218	1	0	96
1.23416	0.9552	0.0448	0.0179	1	0	129		3.65603	0.94	0.06	0.0237	1	0	95
1.24978	0.9328	0.0672	0.0216	3	0	128		3.67686	0.93	0.07	0.0255	1	0	94
1.27061	0.9254	0.0746	0.0227	1	0	125		3.70811	0.92	0.08	0.0271	1	0	93
1.29145	0.9179	0.0821	0.0237	1	0	124		3.73936	0.91	0.09	0.0286	1	0	92
1.30186	0.9104	0.0896	0.0247	1	0	123		3.77061	0.9	0.1	0.03	1	0	91
1.3227	0.903	0.097	0.0256	1	0	122		3.80186	0.88	0.12	0.0325	2	0	90
1.34353	0.8955	0.1045	0.0264	1	0	121		3.83311	0.87	0.13	0.0336	1	0	88
1.36436	0.8806	0.1194	0.028	2	0	120		3.87478	0.86	0.14	0.0347	1	0	87
1.37478	0.8582	0.1418	0.0301	3	0	118		3.89561	0.85	0.15	0.0357	1	0	86
1.39561	0.8507	0.1493	0.0308	1	0	115		3.92686	0.84	0.16	0.0367	1	0	85
1.42166	0.8433	0.1567	0.0314	1	0	114		3.95811	0.83	0.17	0.0376	1	0	84
1.43728	0.8358	0.1642	0.032	1	0	113		3.96332	0.82	0.18	0.0384	1	0	83
1.45811	0.8284	0.1716	0.0326	1	0	112		4.04145	0.81	0.19	0.0392	1	0	82
1.46853	0.8209	0.1791	0.0331	1	0	111		4.06228	0.8	0.2	0.04	1	0	81
1.47895	0.8134	0.1866	0.0337	1	0	110		4.07791	0.79	0.21	0.0407	1	0	80
1.49978	0.7985	0.2015	0.0347	2	0	109		4.08311	0.78	0.22	0.0414	1	0	79
1.52061	0.791	0.209	0.0351	1	0	107		4.10395	0.77	0.23	0.0421	1	0	78
1.53103	0.7836	0.2164	0.0356	1	0	106		4.11436	0.76	0.24	0.0427	1	0	77
1.55186	0.7761	0.2239	0.036	1	0	105		4.16645	0.75	0.25	0.0433	1	0	76
1.5727	0.7612	0.2388	0.0368	2	0	104		4.22895	0.71	0.29	0.0454	4	0	75
1.59353	0.7463	0.2537	0.0376	2	0	102		4.27061	0.7	0.3	0.0458	1	0	71
1.60395	0.7388	0.2612	0.0379	1	0	100		4.33311	0.69	0.31	0.0462	1	0	70
1.62478	0.709	0.291	0.0392	4	0	99		4.34353	0.68	0.32	0.0466	1	0	69
1.65603	0.7015	0.2985	0.0395	1	0	95		4.3852	0.66	0.34	0.0474	2	0	68
1.66124	0.694	0.306	0.0398	1	0	94		4.40603	0.65	0.35	0.0477	1	0	66
1.66645	0.6866	0.3134	0.0401	1	0	93		4.42686	0.63	0.37	0.0483	2	0	65
1.68728	0.6716	0.3284	0.0406	2	0	92		4.4477	0.62	0.38	0.0485	1	0	63
1.70811	0.6642	0.3358	0.0408	1	0	90		4.45811	0.61	0.39	0.0488	1	0	62
1.71332	0.6567	0.3433	0.041	1	0	89		4.46853	0.6	0.4	0.049	1	0	61
1.73936	0.6493	0.3507	0.0412	1	0	88		4.47895	0.59	0.41	0.0492	1	0	60
1.74978	0.6418	0.3582	0.0414	1	0	87		4.49978	0.58	0.42	0.0494	1	0	59
1.7602	0.6269	0.3731	0.0418	2	0	86		4.52061	0.57	0.43	0.0495	1	0	58
1.78103	0.6194	0.3806	0.0419	1	0	84		4.61436	0.56	0.44	0.0496	1	0	57
1.80707	0.6119	0.3881	0.0421	1	0	83		4.62478	0.55	0.45	0.0497	1	0	56
1.81228	0.5821	0.4179	0.0426	4	0	82		4.6352	0.54	0.46	0.0498	1	0	55
1.83311	0.5746	0.4254	0.0427	1	0	78		4.72895	0.53	0.47	0.0499	1	0	54
1.84353	0.5597	0.4403	0.0429	2	0	77		4.73936	0.51	0.49	0.05	2	0	53
1.85916	0.5522	0.4478	0.043	1	0	75		4.7602	0.49	0.51	0.05	2	0	51
1.86436	0.5373	0.4627	0.0431	2	0	74		4.78103	0.48	0.52	0.05	1	0	49
1.87478	0.5299	0.4701	0.0431	1	0	72		4.8227	0.47	0.53	0.0499	1	0	48
1.8852	0.5149	0.4851	0.0432	2	0	71		4.87478	0.45	0.55	0.0497	2	0	47
1.89561	0.5075	0.4925	0.0432	1	0	69		4.89561	0.44	0.56	0.0496	1	0	45
1.90603	0.4925	0.5075	0.0432	2	0	68		4.90603	0.43	0.57	0.0495	1	0	44
1.91645	0.4776	0.5224	0.0432	2	0	66		4.91645	0.41	0.59	0.0492	2	0	43
1.92686	0.4701	0.5299	0.0431	1	0	64		4.93728	0.4	0.6	0.049	1	0	41
1.93728	0.4627	0.5373	0.0431	1	0	63		4.9477	0.39	0.61	0.0488	1	0	40
1.95811	0.4328	0.5672	0.0428	4	0	62		5.0102	0.38	0.62	0.0485	1	0	39
1.96853	0.3881	0.6119	0.0421	6	0	58		5.02582	0.37	0.63	0.0483	1	0	38
1.98936	0.3806	0.6194	0.0419	1	0	52		5.05186	0.36	0.64	0.048	1	0	37
1.99978	0.3731	0.6269	0.0418	1	0	51		5.0727	0.35	0.65	0.0477	1	0	36
2.0102	0.3657	0.6343	0.0416	1	0	50		5.08311	0.33	0.67	0.047	2	0	35
2.02061	0.3507	0.6493	0.0412	2	0	49		5.23936	0.31	0.69	0.0462	2	0	33
2.03624	0.3433	0.6567	0.041	1	0	47		5.29145	0.3	0.7	0.0458	1	0	31
2.04145	0.3284	0.6716	0.0406	2	0	46		5.31228	0.29	0.71	0.0454	1	0	30
2.04666	0.3209	0.6791	0.0403	1	0	44		5.33311	0.27	0.73	0.0444	2	0	29
2.05186	0.3134	0.6866	0.0401	1	0	43		5.36436	0.26	0.74	0.0439	1	0	27
2.0727	0.291	0.709	0.0392	3	0	42		5.39561	0.24	0.76	0.0427	2	0	26
2.08311	0.2761	0.7239	0.0386	2	0	39		5.40603	0.23	0.77	0.0421	1	0	24
2.09353	0.2388	0.7612	0.0368	5	0	37		5.41124	0.22	0.78	0.0414	1	0	23
2.09874	0.2313	0.7687	0.0364	1	0	32		5.43728	0.21	0.79	0.0407	1	0	22
2.10395	0.2239	0.7761	0.036	1	0	31		5.52061	0.2	0.8	0.04	1	0	21
2.11436	0.209	0.791	0.0351	2	0	30		5.60395	0.19	0.81	0.0392	1	0	20
2.1352	0.2015	0.7985	0.0347	1	0	28		5.61436	0.18	0.82	0.0384	1	0	19
2.15603	0.194	0.806	0.0342	1	0	27		5.64561	0.16	0.84	0.0367	2	0	18
2.16645	0.1866	0.8134	0.0337	1	0	26		5.7602	0.14	0.86	0.0347	2	0	16
2.17166	0.1791	0.8209	0.0331	1	0	25		5.80186	0.13	0.87	0.0336	1	0	14
2.17686	0.1716	0.8284	0.0326	1	0	24		5.85395	0.12	0.88	0.0325	1	0	13
2.1977	0.1567	0.8433	0.0314	2	0	23		5.92686	0.11	0.89	0.0313	1	0	12
2.20811	0.1493	0.8507	0.0308	1	0	21		5.99978	0.1	0.9	0.03	1	0	11
2.21853	0.1269	0.8731	0.0288	3	0	20		6.12478	0.09	0.91	0.0286	1	0	10
2.23936	0.1194	0.8806	0.028	1	0	17		6.17686	0.08	0.92	0.0271	1	0	9
2.24978	0.097	0.903	0.0256	3	0	16		6.21332	0.07	0.93	0.0255	1	0	8
2.2602	0.0821	0.9179	0.0237	2	0	13		6.2602	0.06	0.94	0.0237	1	0	7
2.27061	0.0746	0.9254	0.0227	1	0	11		6.27061	0.05	0.95	0.0218	1	0	6
2.29145	0.0672	0.9328	0.0216	1	0	10		6.28103	0.04	0.96	0.0196	1	0	5
2.3227	0.0597	0.9403	0.0205	1	0	9		6.29145	0.03	0.97	0.0171	1	0	4
2.34353	0.0522	0.9478	0.0192	1	0	8		6.33311	0.02	0.98	0.014	1	0	3
2.43728	0.0448	0.9552	0.0179	1	0	7		6.42686	0.01	0.99	0.0099	1	0	2
2.46853	0.0373	0.9627	0.0164	1	0	6		6.58311	0	1	0	1	0	1
2.53103	0.0299	0.9701	0.0147	1	0	5
2.56228	0.0224	0.9776	0.0128	1	0	4
2.58311	0.0149	0.9851	0.0105	1	0	3
2.62478	0.0075	0.9925	0.0074	1	0	2
2.71853	0	1	0	1	0	1

## Sheet: Figure 3C
Figure 3C
wild type 25°C								tax-4(p678) 25°C
Age at Death (d)	Survival	Failure	SurvStdErr	Number failed	Number censored	At Risk		Age at Death (d)	Survival	Failure	SurvStdErr	Number failed	Number censored	At Risk
0	1	0	0	0	0	151		0	1	0	0	0	0	147
0.41653	1	0	0	0	2	151		0.64569	0.9932	0.0068	0.0068	1	0	147
0.68736	0.9933	0.0067	0.0067	1	0	149		0.71861	0.9932	0.0068	0.0068	0	1	146
0.7759	0.9866	0.0134	0.0094	1	0	148		0.91132	0.9863	0.0137	0.0096	1	0	145
0.78632	0.9799	0.0201	0.0115	1	0	147		0.96861	0.9795	0.0205	0.0117	1	0	144
0.79153	0.9732	0.0268	0.0132	1	0	146		0.98944	0.9726	0.0274	0.0135	1	0	143
0.82278	0.9463	0.0537	0.0185	4	0	145		1.02069	0.9658	0.0342	0.015	1	0	142
0.83319	0.9396	0.0604	0.0195	1	0	141		1.12486	0.9658	0.0342	0.015	0	1	141
0.8384	0.9329	0.0671	0.0205	1	0	140		1.15611	0.9589	0.0411	0.0164	1	0	140
0.84882	0.9262	0.0738	0.0214	1	0	139		1.17694	0.952	0.048	0.0177	1	0	139
0.85403	0.9128	0.0872	0.0231	2	0	138		1.19778	0.952	0.048	0.0177	0	1	138
0.86444	0.906	0.094	0.0239	1	0	136		1.20819	0.9451	0.0549	0.0189	1	0	137
0.86965	0.8993	0.1007	0.0247	1	0	135		1.22382	0.9381	0.0619	0.02	1	0	136
0.91653	0.8725	0.1275	0.0273	4	0	134		1.22903	0.9312	0.0688	0.021	1	0	135
0.92694	0.8658	0.1342	0.0279	1	0	130		1.28111	0.9242	0.0758	0.022	1	0	134
0.93736	0.8591	0.1409	0.0285	1	0	129		1.29153	0.9103	0.0897	0.0237	2	1	133
0.94778	0.8456	0.1544	0.0296	2	0	128		1.30194	0.9033	0.0967	0.0246	1	0	130
0.95819	0.8389	0.1611	0.0301	1	0	126		1.31236	0.8893	0.1107	0.0261	2	0	129
0.97903	0.8322	0.1678	0.0306	1	0	125		1.32278	0.8753	0.1247	0.0275	2	0	127
0.98944	0.8255	0.1745	0.0311	1	0	124		1.33319	0.8683	0.1317	0.0282	1	1	125
0.99986	0.8188	0.1812	0.0316	1	0	123		1.34882	0.8612	0.1388	0.0288	1	0	123
1.00507	0.8121	0.1879	0.032	1	0	122		1.36444	0.8542	0.1458	0.0294	1	0	122
1.01028	0.7651	0.2349	0.0347	7	0	121		1.37486	0.833	0.167	0.0311	3	0	121
1.02069	0.7517	0.2483	0.0354	2	0	114		1.39569	0.8189	0.1811	0.0322	2	0	118
1.0259	0.745	0.255	0.0357	1	0	112		1.4009	0.8118	0.1882	0.0327	1	0	116
1.04153	0.7181	0.2819	0.0369	4	0	111		1.42694	0.7906	0.2094	0.034	3	0	115
1.05194	0.7047	0.2953	0.0374	2	0	107		1.45819	0.7836	0.2164	0.0344	1	0	112
1.07278	0.6779	0.3221	0.0383	4	0	105		1.46861	0.7765	0.2235	0.0348	1	0	111
1.08319	0.6644	0.3356	0.0387	2	0	101		1.48944	0.7553	0.2447	0.036	3	0	110
1.0884	0.6577	0.3423	0.0389	1	0	99		1.49465	0.7483	0.2517	0.0363	1	0	107
1.09361	0.6443	0.3557	0.0392	2	0	98		1.49986	0.7342	0.2658	0.037	2	1	106
1.10403	0.6242	0.3758	0.0397	3	0	96		1.50507	0.727	0.273	0.0373	1	0	103
1.10924	0.6174	0.3826	0.0398	1	0	93		1.51028	0.7199	0.2801	0.0376	1	0	102
1.11444	0.5973	0.4027	0.0402	3	2	92		1.52069	0.6985	0.3015	0.0385	3	0	101
1.12486	0.5836	0.4164	0.0404	2	0	87		1.5259	0.6914	0.3086	0.0387	1	0	98
1.13528	0.5493	0.4507	0.0408	5	1	85		1.55194	0.6843	0.3157	0.039	1	0	97
1.14569	0.5284	0.4716	0.041	3	0	79		1.55715	0.6771	0.3229	0.0392	1	0	96
1.15611	0.5075	0.4925	0.0411	3	0	76		1.57278	0.67	0.33	0.0395	1	0	95
1.16132	0.5006	0.4994	0.0412	1	0	73		1.58319	0.6558	0.3442	0.0399	2	0	94
1.16653	0.4797	0.5203	0.0412	3	1	72		1.59361	0.6486	0.3514	0.0401	1	0	92
1.17694	0.4727	0.5273	0.0412	1	0	68		1.62486	0.6272	0.3728	0.0406	3	0	91
1.18215	0.4656	0.5344	0.0411	1	0	67		1.64569	0.6059	0.3941	0.0411	3	0	88
1.18736	0.4586	0.5414	0.0411	1	2	66		1.65611	0.5987	0.4013	0.0412	1	0	85
1.19778	0.4367	0.5633	0.0411	3	0	63		1.66653	0.5845	0.4155	0.0414	2	0	84
1.20819	0.4294	0.5706	0.041	1	0	60		1.67694	0.5631	0.4369	0.0417	3	0	82
1.2134	0.4076	0.5924	0.0408	3	0	59		1.69778	0.5631	0.4369	0.0417	0	2	79
1.21861	0.3931	0.6069	0.0406	2	2	56		1.70819	0.5485	0.4515	0.0419	2	2	77
1.22903	0.3326	0.6674	0.0396	8	0	52		1.71861	0.5485	0.4515	0.0419	0	1	73
1.23944	0.3175	0.6825	0.0392	2	0	44		1.72903	0.5332	0.4668	0.0421	2	0	72
1.24986	0.2872	0.7128	0.0383	4	0	42		1.73944	0.4875	0.5125	0.0424	6	0	70
1.26028	0.2797	0.7203	0.038	1	0	38		1.74986	0.4647	0.5353	0.0424	3	0	64
1.27069	0.2721	0.7279	0.0377	1	0	37		1.76028	0.4418	0.5582	0.0423	3	0	61
1.2759	0.2646	0.7354	0.0374	1	0	36		1.77069	0.419	0.581	0.0422	3	0	58
1.28111	0.257	0.743	0.0371	1	0	35		1.78111	0.4114	0.5886	0.0421	1	0	55
1.29153	0.2192	0.7808	0.0353	5	0	34		1.79153	0.4114	0.5886	0.0421	0	1	54
1.30194	0.1965	0.8035	0.034	3	0	29		1.80194	0.3958	0.6042	0.0419	2	0	53
1.30715	0.189	0.811	0.0335	1	0	26		1.81236	0.3803	0.6197	0.0417	2	1	51
1.31236	0.1739	0.8261	0.0325	2	1	25		1.82278	0.3724	0.6276	0.0415	1	0	48
1.32278	0.1422	0.8578	0.0302	4	0	22		1.85403	0.3486	0.6514	0.0411	3	0	47
1.34361	0.1343	0.8657	0.0295	1	2	18		1.86444	0.3328	0.6672	0.0407	2	0	44
1.35403	0.1254	0.8746	0.0289	1	0	15		1.88528	0.3248	0.6752	0.0405	1	0	42
1.37486	0.1075	0.8925	0.0274	2	0	14		1.89569	0.3169	0.6831	0.0403	1	0	41
1.38528	0.0896	0.9104	0.0256	2	0	12		1.91653	0.3011	0.6989	0.0398	2	1	40
1.39049	0.0806	0.9194	0.0245	1	0	10		1.92694	0.3011	0.6989	0.0398	0	1	37
1.40611	0.0716	0.9284	0.0234	1	0	9		1.93736	0.2927	0.7073	0.0396	1	0	36
1.41653	0.0537	0.9463	0.0207	2	0	8		1.94778	0.2844	0.7156	0.0393	1	0	35
1.45819	0.0448	0.9552	0.0191	1	0	6		1.95819	0.276	0.724	0.039	1	0	34
1.46861	0.0358	0.9642	0.0172	1	0	5		1.9634	0.2593	0.7407	0.0384	2	0	33
1.52069	0.0269	0.9731	0.0151	1	0	4		1.96861	0.2258	0.7742	0.0369	4	0	31
1.58319	0.0179	0.9821	0.0124	1	0	3		1.97903	0.2091	0.7909	0.036	2	1	27
1.60403	0.009	0.991	0.0089	1	0	2		1.99986	0.2004	0.7996	0.0356	1	0	24
1.62486	0	1	0	1	0	1		2.01028	0.1917	0.8083	0.0351	1	0	23
								2.02069	0.1829	0.8171	0.0345	1	0	22
								2.0259	0.1742	0.8258	0.034	1	0	21
								2.04153	0.1568	0.8432	0.0327	2	0	20
								2.05194	0.1394	0.8606	0.0313	2	0	18
								2.06236	0.1307	0.8693	0.0306	1	0	16
								2.11444	0.122	0.878	0.0297	1	0	15
								2.13528	0.1045	0.8955	0.0279	2	0	14
								2.14569	0.0871	0.9129	0.0258	2	0	12
								2.15611	0.0697	0.9303	0.0234	2	0	10
								2.16653	0.061	0.939	0.0221	1	0	8
								2.22903	0.0523	0.9477	0.0206	1	0	7
								2.24986	0.0348	0.9652	0.017	2	0	6
								2.27069	0.0261	0.9739	0.0148	1	0	4
								2.31236	0.0174	0.9826	0.0122	1	0	3
								2.41653	0.0087	0.9913	0.0087	1	0	2
								2.47903	0	1	0	1	0	1

## Sheet: Figure 3D
Figure 3D
wild type 20°C								AFD ablated 20°C
Age at Death (d)	Survival	Failure	SurvStdErr	Number failed	Number censored	At Risk		Age at Death (d)	Survival	Failure	SurvStdErr	Number failed	Number censored	At Risk
0	1	0	0	0	0	134		0	1	0	0	0	0	109
0.15206	0.9925	0.0075	0.0074	1	0	134		1.99581	0.9908	0.0092	0.0091	1	0	109
0.94373	0.9776	0.0224	0.0128	2	0	133		2.12081	0.9817	0.0183	0.0129	1	0	108
0.99581	0.9701	0.0299	0.0147	1	0	131		2.43331	0.9725	0.0275	0.0157	1	0	107
1.02706	0.9627	0.0373	0.0164	1	0	130		2.55831	0.9633	0.0367	0.018	1	0	106
1.06873	0.9552	0.0448	0.0179	1	0	129		2.72498	0.9541	0.0459	0.02	1	0	105
1.07914	0.9478	0.0522	0.0192	1	0	128		2.82914	0.945	0.055	0.0218	1	0	104
1.16248	0.9403	0.0597	0.0205	1	0	127		2.90206	0.9358	0.0642	0.0235	1	0	103
1.18331	0.9328	0.0672	0.0216	1	0	126		2.97498	0.9174	0.0826	0.0264	2	0	102
1.19373	0.9254	0.0746	0.0227	1	0	125		3.02706	0.9083	0.0917	0.0276	1	0	100
1.20414	0.9179	0.0821	0.0237	1	0	124		3.14164	0.8991	0.1009	0.0289	1	0	99
1.31873	0.9104	0.0896	0.0247	1	0	123		3.24581	0.8807	0.1193	0.031	2	0	98
1.32914	0.903	0.097	0.0256	1	0	122		3.31873	0.8716	0.1284	0.032	1	0	96
1.33956	0.8955	0.1045	0.0264	1	0	121		3.32914	0.8624	0.1376	0.033	1	0	95
1.36039	0.8806	0.1194	0.028	2	0	120		3.37081	0.844	0.156	0.0348	2	0	94
1.38123	0.8731	0.1269	0.0288	1	0	118		3.41248	0.8349	0.1651	0.0356	1	0	92
1.42289	0.8582	0.1418	0.0301	2	0	117		3.52706	0.8165	0.1835	0.0371	2	0	91
1.43331	0.8507	0.1493	0.0308	1	0	115		3.56873	0.8073	0.1927	0.0378	1	0	89
1.44373	0.8358	0.1642	0.032	2	0	114		3.62081	0.7982	0.2018	0.0384	1	0	88
1.45414	0.8284	0.1716	0.0326	1	0	112		3.80831	0.789	0.211	0.0391	1	0	87
1.48539	0.8134	0.1866	0.0337	2	0	111		3.91248	0.7706	0.2294	0.0403	2	0	86
1.50623	0.806	0.194	0.0342	1	0	109		3.95414	0.7615	0.2385	0.0408	1	0	84
1.55831	0.7985	0.2015	0.0347	1	0	108		3.97498	0.7523	0.2477	0.0413	1	0	83
1.57914	0.791	0.209	0.0351	1	0	107		4.01664	0.7431	0.2569	0.0418	1	0	82
1.61039	0.7836	0.2164	0.0356	1	0	106		4.06873	0.7339	0.2661	0.0423	1	0	81
1.62081	0.7687	0.2313	0.0364	2	0	105		4.09998	0.7248	0.2752	0.0428	1	0	80
1.66248	0.7612	0.2388	0.0368	1	0	103		4.12081	0.7156	0.2844	0.0432	1	0	79
1.69373	0.7537	0.2463	0.0372	1	0	102		4.14164	0.7064	0.2936	0.0436	1	0	78
1.70414	0.7463	0.2537	0.0376	1	0	101		4.22498	0.6881	0.3119	0.0444	2	0	77
1.71456	0.7313	0.2687	0.0383	2	0	100		4.23539	0.6789	0.3211	0.0447	1	0	75
1.73539	0.7239	0.2761	0.0386	1	0	98		4.24581	0.6697	0.3303	0.045	1	0	74
1.75623	0.7164	0.2836	0.0389	1	0	97		4.27706	0.6606	0.3394	0.0454	1	0	73
1.77706	0.694	0.306	0.0398	3	0	96		4.28748	0.6239	0.3761	0.0464	4	0	72
1.78748	0.6791	0.3209	0.0403	2	0	93		4.30831	0.6147	0.3853	0.0466	1	0	68
1.79789	0.6716	0.3284	0.0406	1	0	91		4.34998	0.5963	0.4037	0.047	2	0	67
1.80831	0.6567	0.3433	0.041	2	0	90		4.36039	0.5872	0.4128	0.0472	1	0	65
1.82914	0.6493	0.3507	0.0412	1	0	88		4.37081	0.5688	0.4312	0.0474	2	0	64
1.83956	0.6418	0.3582	0.0414	1	0	87		4.39164	0.5596	0.4404	0.0475	1	0	62
1.87081	0.6269	0.3731	0.0418	2	0	86		4.40206	0.5505	0.4495	0.0476	1	0	61
1.89164	0.6045	0.3955	0.0422	3	0	84		4.49581	0.5413	0.4587	0.0477	1	0	60
1.90206	0.5746	0.4254	0.0427	4	0	81		4.51664	0.5321	0.4679	0.0478	1	0	59
1.91248	0.5597	0.4403	0.0429	2	0	77		4.52706	0.5229	0.4771	0.0478	1	0	58
1.93331	0.5448	0.4552	0.043	2	0	75		4.61039	0.5046	0.4954	0.0479	2	0	57
1.94373	0.5373	0.4627	0.0431	1	0	73		4.69373	0.4954	0.5046	0.0479	1	0	55
1.96456	0.5299	0.4701	0.0431	1	0	72		4.73539	0.4771	0.5229	0.0478	2	0	54
1.97498	0.5224	0.4776	0.0432	1	0	71		4.74581	0.4587	0.5413	0.0477	2	0	52
1.99581	0.5	0.5	0.0432	3	0	70		4.76664	0.4404	0.5596	0.0475	2	0	50
2.00623	0.4925	0.5075	0.0432	1	0	67		4.80831	0.422	0.578	0.0473	2	0	48
2.02706	0.4851	0.5149	0.0432	1	0	66		4.84998	0.4037	0.5963	0.047	2	0	46
2.03748	0.4627	0.5373	0.0431	3	0	65		4.86039	0.3945	0.6055	0.0468	1	0	44
2.04789	0.4478	0.5522	0.043	2	0	62		4.87081	0.3853	0.6147	0.0466	1	0	43
2.05831	0.4328	0.5672	0.0428	2	0	60		4.97498	0.3761	0.6239	0.0464	1	0	42
2.07914	0.403	0.597	0.0424	4	0	58		5.02706	0.367	0.633	0.0462	1	0	41
2.08956	0.3881	0.6119	0.0421	2	0	54		5.05831	0.3486	0.6514	0.0456	2	0	40
2.09998	0.3731	0.6269	0.0418	2	0	52		5.07914	0.3394	0.6606	0.0454	1	0	38
2.12081	0.3582	0.6418	0.0414	2	0	50		5.11039	0.3303	0.6697	0.045	1	0	37
2.14164	0.3209	0.6791	0.0403	5	0	48		5.14164	0.3211	0.6789	0.0447	1	0	36
2.16248	0.3134	0.6866	0.0401	1	0	43		5.15206	0.3119	0.6881	0.0444	1	0	35
2.17289	0.2985	0.7015	0.0395	2	0	42		5.19373	0.3028	0.6972	0.044	1	0	34
2.18331	0.2836	0.7164	0.0389	2	0	40		5.22498	0.2936	0.7064	0.0436	1	0	33
2.21456	0.2687	0.7313	0.0383	2	0	38		5.27706	0.2752	0.7248	0.0428	2	0	32
2.22498	0.2612	0.7388	0.0379	1	0	36		5.31873	0.2661	0.7339	0.0423	1	0	30
2.25623	0.2537	0.7463	0.0376	1	0	35		5.41248	0.2569	0.7431	0.0418	1	0	29
2.27706	0.2388	0.7612	0.0368	2	0	34		5.43331	0.2477	0.7523	0.0413	1	0	28
2.29789	0.2164	0.7836	0.0356	3	0	32		5.48539	0.2385	0.7615	0.0408	1	0	27
2.30831	0.209	0.791	0.0351	1	0	29		5.52706	0.2294	0.7706	0.0403	1	0	26
2.32914	0.2015	0.7985	0.0347	1	0	28		5.56873	0.2202	0.7798	0.0397	1	0	25
2.33956	0.194	0.806	0.0342	1	0	27		5.57914	0.211	0.789	0.0391	1	0	24
2.36039	0.1866	0.8134	0.0337	1	0	26		5.61039	0.2018	0.7982	0.0384	1	0	23
2.39164	0.1791	0.8209	0.0331	1	0	25		5.64164	0.1927	0.8073	0.0378	1	0	22
2.42289	0.1642	0.8358	0.032	2	0	24		5.73539	0.1835	0.8165	0.0371	1	0	21
2.43331	0.1418	0.8582	0.0301	3	0	22		5.81873	0.1743	0.8257	0.0363	1	0	20
2.46456	0.1343	0.8657	0.0295	1	0	19		5.82914	0.1651	0.8349	0.0356	1	0	19
2.47498	0.1194	0.8806	0.028	2	0	18		5.90206	0.156	0.844	0.0348	1	0	18
2.50623	0.1045	0.8955	0.0264	2	0	16		5.94373	0.1468	0.8532	0.0339	1	0	17
2.51664	0.097	0.903	0.0256	1	0	14		5.95414	0.1376	0.8624	0.033	1	0	16
2.55831	0.0896	0.9104	0.0247	1	0	13		6.07914	0.1284	0.8716	0.032	1	0	15
2.58956	0.0821	0.9179	0.0237	1	0	12		6.28748	0.1193	0.8807	0.031	1	0	14
2.64164	0.0746	0.9254	0.0227	1	0	11		6.47498	0.1101	0.8899	0.03	1	0	13
2.70414	0.0672	0.9328	0.0216	1	0	10		6.65206	0.1009	0.8991	0.0289	1	0	12
2.75623	0.0597	0.9403	0.0205	1	0	9		6.75623	0.0917	0.9083	0.0276	1	0	11
2.88123	0.0448	0.9552	0.0179	2	0	8		6.76664	0.0826	0.9174	0.0264	1	0	10
2.99581	0.0373	0.9627	0.0164	1	0	6		6.82914	0.0734	0.9266	0.025	1	0	9
3.02706	0.0299	0.9701	0.0147	1	0	5		6.91248	0.0642	0.9358	0.0235	1	0	8
3.05831	0.0224	0.9776	0.0128	1	0	4		7.06873	0.055	0.945	0.0218	1	0	7
3.25623	0.0149	0.9851	0.0105	1	0	3		7.30831	0.0459	0.9541	0.02	1	0	6
3.31873	0.0075	0.9925	0.0074	1	0	2		7.31873	0.0367	0.9633	0.018	1	0	5
3.54789	0	1	0	1	0	1		7.32914	0.0275	0.9725	0.0157	1	0	4
								7.93331	0.0183	0.9817	0.0129	1	0	3
								8.30831	0.0092	0.9908	0.0091	1	0	2
								8.43331	0	1	0	1	0	1

## Sheet: Figure 3E
Figure 3E
wild type 25°C								AFD ablated 25°C
Age at Death (d)	Survival	Failure	SurvStdErr	Number failed	Number censored	At Risk		Age at Death (d)	Survival	Failure	SurvStdErr	Number failed	Number censored	At Risk
0	1	0	0	0	0	137		0	1	0	0	0	0	138
0.52107	0.9927	0.0073	0.0073	1	0	137		0.13565	0.9928	0.0072	0.0072	1	0	138
0.53148	0.9854	0.0146	0.0102	1	0	136		0.64607	0.9855	0.0145	0.0102	1	0	137
0.5419	0.9708	0.0292	0.0144	2	0	135		0.6669	0.9783	0.0217	0.0124	1	0	136
0.57315	0.9635	0.0365	0.016	1	0	133		0.71898	0.971	0.029	0.0143	1	0	135
0.58357	0.9562	0.0438	0.0175	1	0	132		0.80232	0.9638	0.0362	0.0159	1	0	134
0.61482	0.9489	0.0511	0.0188	1	0	131		0.82315	0.9565	0.0435	0.0174	1	0	133
0.63565	0.9416	0.0584	0.02	1	0	130		0.84398	0.9348	0.0652	0.021	3	0	132
0.6669	0.9124	0.0876	0.0242	4	0	129		0.8544	0.9203	0.0797	0.0231	2	0	129
0.67732	0.9051	0.0949	0.025	1	0	125		0.86482	0.913	0.087	0.024	1	0	127
0.68773	0.8905	0.1095	0.0267	2	0	124		0.87523	0.9058	0.0942	0.0249	1	0	126
0.69815	0.8759	0.1241	0.0282	2	0	122		0.88565	0.8768	0.1232	0.028	4	0	125
0.70857	0.8613	0.1387	0.0295	2	0	120		0.90648	0.8696	0.1304	0.0287	1	0	121
0.71898	0.8321	0.1679	0.0319	4	0	118		0.92732	0.8551	0.1449	0.03	2	0	120
0.7294	0.8175	0.1825	0.033	2	0	114		0.93773	0.8478	0.1522	0.0306	1	0	118
0.73982	0.8102	0.1898	0.0335	1	0	112		0.95857	0.8333	0.1667	0.0317	2	0	117
0.75023	0.7956	0.2044	0.0345	2	0	111		0.96898	0.8188	0.1812	0.0328	2	0	115
0.76065	0.7591	0.2409	0.0365	5	0	109		0.9794	0.8116	0.1884	0.0333	1	0	113
0.77107	0.7445	0.2555	0.0373	2	0	104		0.98982	0.8043	0.1957	0.0338	1	0	112
0.78148	0.7372	0.2628	0.0376	1	0	102		1.00023	0.7826	0.2174	0.0351	3	0	111
0.7919	0.7153	0.2847	0.0386	3	0	101		1.01065	0.7754	0.2246	0.0355	1	0	108
0.80232	0.6715	0.3285	0.0401	6	0	98		1.02106	0.7681	0.2319	0.0359	1	0	107
0.81273	0.6569	0.3431	0.0406	2	0	92		1.03148	0.7536	0.2464	0.0367	2	0	106
0.82315	0.6423	0.3577	0.041	2	0	90		1.0419	0.7319	0.2681	0.0377	3	0	104
0.83357	0.6204	0.3796	0.0415	3	0	88		1.05231	0.7174	0.2826	0.0383	2	0	101
0.84398	0.6131	0.3869	0.0416	1	0	85		1.07315	0.7101	0.2899	0.0386	1	0	99
0.8544	0.5839	0.4161	0.0421	4	0	84		1.08356	0.6957	0.3043	0.0392	2	0	98
0.86482	0.5547	0.4453	0.0425	4	0	80		1.09398	0.6884	0.3116	0.0394	1	0	96
0.87523	0.5328	0.4672	0.0426	3	0	76		1.1044	0.6812	0.3188	0.0397	1	0	95
0.88565	0.4891	0.5109	0.0427	6	0	73		1.11481	0.6667	0.3333	0.0401	2	0	94
0.89607	0.4745	0.5255	0.0427	2	0	67		1.12523	0.6594	0.3406	0.0403	1	0	92
0.90648	0.4526	0.5474	0.0425	3	0	65		1.13565	0.6377	0.3623	0.0409	3	0	91
0.9169	0.438	0.562	0.0424	2	0	62		1.17731	0.6014	0.3986	0.0417	5	0	88
0.92732	0.4161	0.5839	0.0421	3	0	60		1.18773	0.5942	0.4058	0.0418	1	0	83
0.93773	0.4088	0.5912	0.042	1	0	57		1.19815	0.5725	0.4275	0.0421	3	0	82
0.94815	0.3796	0.6204	0.0415	4	0	56		1.20856	0.558	0.442	0.0423	2	0	79
0.95857	0.365	0.635	0.0411	2	0	52		1.23981	0.5362	0.4638	0.0425	3	0	77
0.9794	0.3504	0.6496	0.0408	2	0	50		1.25023	0.529	0.471	0.0425	1	0	74
0.98982	0.3285	0.6715	0.0401	3	0	48		1.27106	0.4855	0.5145	0.0425	6	0	73
1.00023	0.3066	0.6934	0.0394	3	0	45		1.2919	0.4783	0.5217	0.0425	1	0	67
1.01065	0.292	0.708	0.0388	2	0	42		1.30231	0.4565	0.5435	0.0424	3	0	66
1.02106	0.2847	0.7153	0.0386	1	0	40		1.31273	0.4275	0.5725	0.0421	4	0	63
1.03148	0.2774	0.7226	0.0382	1	0	39		1.32315	0.3913	0.6087	0.0415	5	0	59
1.0419	0.2628	0.7372	0.0376	2	0	38		1.33356	0.3696	0.6304	0.0411	3	0	54
1.05231	0.2555	0.7445	0.0373	1	0	36		1.3544	0.3406	0.6594	0.0403	4	0	51
1.06273	0.2263	0.7737	0.0357	4	0	35		1.36481	0.3333	0.6667	0.0401	1	0	47
1.07315	0.2044	0.7956	0.0345	3	0	31		1.37523	0.3188	0.6812	0.0397	2	0	46
1.08356	0.1898	0.8102	0.0335	2	0	28		1.39606	0.3116	0.6884	0.0394	1	0	44
1.09398	0.1825	0.8175	0.033	1	0	26		1.40648	0.3043	0.6957	0.0392	1	0	43
1.1044	0.1679	0.8321	0.0319	2	0	25		1.4169	0.2826	0.7174	0.0383	3	0	42
1.11481	0.1533	0.8467	0.0308	2	0	23		1.43773	0.2681	0.7319	0.0377	2	0	39
1.14606	0.1241	0.8759	0.0282	4	0	21		1.45856	0.2536	0.7464	0.037	2	0	37
1.15648	0.1168	0.8832	0.0274	1	0	17		1.46898	0.2464	0.7536	0.0367	1	0	35
1.1669	0.1095	0.8905	0.0267	1	0	16		1.4794	0.2246	0.7754	0.0355	3	0	34
1.18773	0.1022	0.8978	0.0259	1	0	15		1.48981	0.2101	0.7899	0.0347	2	0	31
1.2294	0.0949	0.9051	0.025	1	0	14		1.51065	0.2029	0.7971	0.0342	1	0	29
1.23981	0.0876	0.9124	0.0242	1	0	13		1.52106	0.1957	0.8043	0.0338	1	0	28
1.25023	0.0803	0.9197	0.0232	1	0	12		1.5419	0.1884	0.8116	0.0333	1	0	27
1.27106	0.073	0.927	0.0222	1	0	11		1.55231	0.1739	0.8261	0.0323	2	0	26
1.28148	0.0657	0.9343	0.0212	1	0	10		1.56273	0.1667	0.8333	0.0317	1	0	24
1.31273	0.0584	0.9416	0.02	1	0	9		1.57315	0.1594	0.8406	0.0312	1	0	23
1.32315	0.0511	0.9489	0.0188	1	0	8		1.62523	0.1449	0.8551	0.03	2	0	22
1.36481	0.0292	0.9708	0.0144	3	0	7		1.63565	0.1304	0.8696	0.0287	2	0	20
1.42731	0.0219	0.9781	0.0125	1	0	4		1.64606	0.1232	0.8768	0.028	1	0	18
1.50023	0.0146	0.9854	0.0102	1	0	3		1.70856	0.1159	0.8841	0.0273	1	0	17
1.52106	0.0073	0.9927	0.0073	1	0	2		1.7294	0.1087	0.8913	0.0265	1	0	16
1.57315	0	1	0	1	0	1		1.75023	0.1014	0.8986	0.0257	1	0	15
								1.78148	0.0942	0.9058	0.0249	1	0	14
								1.7919	0.087	0.913	0.024	1	0	13
								1.8544	0.0652	0.9348	0.021	3	0	12
								1.90648	0.058	0.942	0.0199	1	0	9
								1.94815	0.0507	0.9493	0.0187	1	0	8
								1.95856	0.0435	0.9565	0.0174	1	0	7
								2.0419	0.0362	0.9638	0.0159	1	0	6
								2.1044	0.029	0.971	0.0143	1	0	5
								2.14606	0.0217	0.9783	0.0124	1	0	4
								2.15648	0.0145	0.9855	0.0102	1	0	3
								2.25023	0.0072	0.9928	0.0072	1	0	2
								2.43773	0	1	0	1	0	1

## Sheet: Figure 3H
Figure 3H
wild type 20°C → 20°C								wild type 25°C → 20°C								AFD ablated 20°C → 20°C								AFD ablated 25°C → 20°C
Age at Death (d)	Survival	Failure	SurvStdErr	Number failed	Number censored	At Risk		Age at Death (d)	Survival	Failure	SurvStdErr	Number failed	Number censored	At Risk		Age at Death (d)	Survival	Failure	SurvStdErr	Number failed	Number censored	At Risk		Age at Death (d)	Survival	Failure	SurvStdErr	Number failed	Number censored	At Risk
0	1	0	0	0	0	122		0	1	0	0	0	0	120		0	1	0	0	0	0	112		0	1	0	0	0	0	90
0.09275	0.9918	0.0082	0.0082	1	0	122		1.28025	0.9917	0.0083	0.0083	1	0	120		0.08234	0.9911	0.0089	0.0089	1	0	112		1.65525	0.9889	0.0111	0.011	1	0	90
1.20734	0.9836	0.0164	0.0115	1	0	121		1.35317	0.9833	0.0167	0.0117	1	0	119		0.30109	0.9821	0.0179	0.0125	1	0	111		1.71775	0.9778	0.0222	0.0155	1	0	89
1.249	0.9754	0.0246	0.014	1	0	120		1.374	0.975	0.025	0.0143	1	0	118		1.00942	0.9732	0.0268	0.0153	1	0	110		1.73859	0.9556	0.0444	0.0217	2	0	88
1.28025	0.9672	0.0328	0.0161	1	0	119		1.45734	0.9667	0.0333	0.0164	1	0	117		1.32192	0.9643	0.0357	0.0175	1	0	109		1.76984	0.9333	0.0667	0.0263	2	0	86
1.29067	0.959	0.041	0.0179	1	0	118		1.50942	0.9583	0.0417	0.0182	1	0	116		1.4365	0.9554	0.0446	0.0195	1	0	108		1.78025	0.9111	0.0889	0.03	2	0	84
1.3115	0.9508	0.0492	0.0196	1	0	117		1.57192	0.95	0.05	0.0199	1	0	115		1.45734	0.9464	0.0536	0.0213	1	0	107		1.80109	0.9	0.1	0.0316	1	0	82
1.32192	0.9262	0.0738	0.0237	3	0	116		1.60317	0.9417	0.0583	0.0214	1	0	114		1.60317	0.9375	0.0625	0.0229	1	0	106		1.83234	0.8778	0.1222	0.0345	2	0	81
1.33234	0.918	0.082	0.0248	1	0	113		1.64484	0.9333	0.0667	0.0228	1	0	113		1.69692	0.9286	0.0714	0.0243	1	0	105		1.84275	0.8667	0.1333	0.0358	1	0	79
1.35317	0.9016	0.0984	0.027	2	0	112		1.70734	0.925	0.075	0.024	1	0	112		1.8115	0.9196	0.0804	0.0257	1	0	104		1.86359	0.8556	0.1444	0.0371	1	0	78
1.36359	0.877	0.123	0.0297	3	0	110		1.78025	0.9083	0.0917	0.0263	2	0	111		1.86359	0.9107	0.0893	0.0269	1	0	103		1.88442	0.8444	0.1556	0.0382	1	0	77
1.38442	0.8525	0.1475	0.0321	3	0	107		1.79067	0.9	0.1	0.0274	1	0	109		1.89484	0.9018	0.0982	0.0281	1	0	102		1.89484	0.8333	0.1667	0.0393	1	0	76
1.39484	0.8443	0.1557	0.0328	1	0	104		1.8115	0.8917	0.1083	0.0284	1	0	108		1.96775	0.8929	0.1071	0.0292	1	0	101		1.9365	0.8222	0.1778	0.0403	1	0	75
1.40525	0.8361	0.1639	0.0335	1	0	103		1.85317	0.8833	0.1167	0.0293	1	0	107		1.97817	0.8839	0.1161	0.0303	1	0	100		1.94692	0.8111	0.1889	0.0413	1	0	74
1.41567	0.8279	0.1721	0.0342	1	0	102		1.91567	0.875	0.125	0.0302	1	0	106		1.98859	0.875	0.125	0.0312	1	0	99		2.03025	0.8	0.2	0.0422	1	0	73
1.4365	0.8197	0.1803	0.0348	1	0	101		1.92609	0.8667	0.1333	0.031	1	0	105		2.10317	0.8661	0.1339	0.0322	1	0	98		2.05109	0.7778	0.2222	0.0438	2	0	72
1.44692	0.8033	0.1967	0.036	2	0	100		1.95734	0.85	0.15	0.0326	2	0	104		2.11359	0.8571	0.1429	0.0331	1	0	97		2.0615	0.7556	0.2444	0.0453	2	0	70
1.45734	0.7787	0.2213	0.0376	3	0	98		1.999	0.8417	0.1583	0.0333	1	0	102		2.14484	0.8482	0.1518	0.0339	1	0	96		2.07192	0.7444	0.2556	0.046	1	0	68
1.46775	0.7459	0.2541	0.0394	4	0	95		2.00942	0.8333	0.1667	0.034	1	0	101		2.249	0.8393	0.1607	0.0347	1	0	95		2.09275	0.7333	0.2667	0.0466	1	0	67
1.47817	0.7295	0.2705	0.0402	2	0	91		2.03025	0.825	0.175	0.0347	1	0	100		2.26984	0.8304	0.1696	0.0355	1	0	94		2.14484	0.7111	0.2889	0.0478	2	0	66
1.48859	0.7131	0.2869	0.0409	2	0	89		2.04067	0.8167	0.1833	0.0353	1	0	99		2.28025	0.8214	0.1786	0.0362	1	0	93		2.15525	0.6889	0.3111	0.0488	2	0	64
1.50942	0.6885	0.3115	0.0419	3	0	87		2.07192	0.8083	0.1917	0.0359	1	0	98		2.30109	0.8125	0.1875	0.0369	1	0	92		2.1865	0.6778	0.3222	0.0493	1	0	62
1.51984	0.6639	0.3361	0.0428	3	0	84		2.08234	0.8	0.2	0.0365	1	0	97		2.32192	0.8036	0.1964	0.0375	1	0	91		2.22817	0.6667	0.3333	0.0497	1	0	61
1.53025	0.6557	0.3443	0.043	1	0	81		2.09275	0.7917	0.2083	0.0371	1	0	96		2.36359	0.7857	0.2143	0.0388	2	0	90		2.23859	0.6333	0.3667	0.0508	3	0	60
1.54067	0.6475	0.3525	0.0433	1	0	80		2.10317	0.7833	0.2167	0.0376	1	0	95		2.38442	0.7857	0.2143	0.0388	0	1	88		2.25942	0.6	0.4	0.0516	3	0	57
1.55109	0.6311	0.3689	0.0437	2	0	79		2.15525	0.775	0.225	0.0381	1	0	94		2.39484	0.7767	0.2233	0.0394	1	0	87		2.26984	0.5889	0.4111	0.0519	1	0	54
1.5615	0.6148	0.3852	0.0441	2	0	77		2.16567	0.75	0.25	0.0395	3	0	93		2.4365	0.7677	0.2323	0.0399	1	0	86		2.28025	0.5778	0.4222	0.0521	1	0	53
1.57192	0.5902	0.4098	0.0445	3	0	75		2.20734	0.7417	0.2583	0.04	1	0	90		2.45734	0.7586	0.2414	0.0405	1	0	85		2.30109	0.5667	0.4333	0.0522	1	0	52
1.58234	0.5656	0.4344	0.0449	3	0	72		2.249	0.7333	0.2667	0.0404	1	0	89		2.48859	0.7406	0.2594	0.0415	2	0	84		2.3115	0.5556	0.4444	0.0524	1	0	51
1.59275	0.5492	0.4508	0.045	2	0	69		2.25942	0.725	0.275	0.0408	1	0	88		2.51984	0.7225	0.2775	0.0424	2	0	82		2.32192	0.5444	0.4556	0.0525	1	0	50
1.60317	0.541	0.459	0.0451	1	0	67		2.26984	0.7167	0.2833	0.0411	1	0	87		2.53025	0.7044	0.2956	0.0432	2	0	80		2.36359	0.5222	0.4778	0.0527	2	0	49
1.61359	0.4918	0.5082	0.0453	6	0	66		2.28025	0.7083	0.2917	0.0415	1	0	86		2.60317	0.6954	0.3046	0.0436	1	0	78		2.39484	0.5	0.5	0.0527	2	0	47
1.624	0.4672	0.5328	0.0452	3	0	60		2.29067	0.6917	0.3083	0.0422	2	0	85		2.61359	0.6864	0.3136	0.0439	1	0	77		2.40525	0.4889	0.5111	0.0527	1	0	45
1.63442	0.4508	0.5492	0.045	2	0	57		2.30109	0.6667	0.3333	0.043	3	0	83		2.64484	0.6773	0.3227	0.0443	1	0	76		2.4365	0.4778	0.5222	0.0527	1	0	44
1.64484	0.4344	0.5656	0.0449	2	0	55		2.3115	0.65	0.35	0.0435	2	0	80		2.65525	0.6773	0.3227	0.0443	0	1	75		2.50942	0.4667	0.5333	0.0526	1	0	43
1.65525	0.4262	0.5738	0.0448	1	0	53		2.33234	0.6333	0.3667	0.044	2	0	78		2.66567	0.6682	0.3318	0.0446	1	0	74		2.55109	0.4444	0.5556	0.0524	2	0	42
1.66567	0.418	0.582	0.0447	1	0	52		2.35317	0.6167	0.3833	0.0444	2	0	76		2.6865	0.6499	0.3501	0.0452	2	0	73		2.5615	0.4333	0.5667	0.0522	1	0	40
1.67609	0.4098	0.5902	0.0445	1	0	51		2.38442	0.6083	0.3917	0.0446	1	0	74		2.72817	0.6407	0.3593	0.0455	1	0	71		2.59275	0.4222	0.5778	0.0521	1	0	39
1.6865	0.3852	0.6148	0.0441	3	0	50		2.39484	0.5917	0.4083	0.0449	2	0	73		2.749	0.6316	0.3684	0.0458	1	0	70		2.61359	0.4111	0.5889	0.0519	1	0	38
1.69692	0.3689	0.6311	0.0437	2	0	47		2.40525	0.5833	0.4167	0.045	1	0	71		2.75942	0.6224	0.3776	0.046	1	0	69		2.63442	0.3889	0.6111	0.0514	2	0	37
1.70734	0.3443	0.6557	0.043	3	0	45		2.42609	0.575	0.425	0.0451	1	0	70		2.83234	0.6133	0.3867	0.0462	1	0	68		2.67609	0.3778	0.6222	0.0511	1	0	35
1.71775	0.3361	0.6639	0.0428	1	0	42		2.46775	0.5583	0.4417	0.0453	2	0	69		2.85317	0.6041	0.3959	0.0465	1	0	67		2.6865	0.3667	0.6333	0.0508	1	0	34
1.72817	0.3115	0.6885	0.0419	3	0	41		2.48859	0.55	0.45	0.0454	1	0	67		2.86359	0.595	0.405	0.0466	1	0	66		2.69692	0.3556	0.6444	0.0505	1	0	33
1.749	0.3033	0.6967	0.0416	1	0	38		2.499	0.525	0.475	0.0456	3	0	66		2.88442	0.5858	0.4142	0.0468	1	0	65		2.75942	0.3444	0.6556	0.0501	1	0	32
1.75942	0.2869	0.7131	0.0409	2	0	37		2.50942	0.5083	0.4917	0.0456	2	0	63		2.89484	0.5767	0.4233	0.047	1	0	64		2.82192	0.3333	0.6667	0.0497	1	0	31
1.76984	0.2705	0.7295	0.0402	2	0	35		2.53025	0.4917	0.5083	0.0456	2	0	61		2.90525	0.5583	0.4417	0.0472	2	0	63		2.85317	0.3111	0.6889	0.0488	2	0	30
1.79067	0.2541	0.7459	0.0394	2	0	33		2.55109	0.4833	0.5167	0.0456	1	0	59		2.92609	0.5492	0.4508	0.0473	1	0	61		2.88442	0.2889	0.7111	0.0478	2	0	28
1.80109	0.2377	0.7623	0.0385	2	0	31		2.5615	0.475	0.525	0.0456	1	0	58		2.94692	0.5309	0.4691	0.0475	2	0	60		2.96775	0.2778	0.7222	0.0472	1	0	26
1.8115	0.2295	0.7705	0.0381	1	0	29		2.57192	0.4667	0.5333	0.0455	1	0	57		2.97817	0.5217	0.4783	0.0475	1	0	58		2.97817	0.2667	0.7333	0.0466	1	0	25
1.82192	0.1803	0.8197	0.0348	6	0	28		2.59275	0.4583	0.5417	0.0455	1	0	56		3.01984	0.5126	0.4874	0.0476	1	0	57		3.01984	0.2556	0.7444	0.046	1	0	24
1.85317	0.1721	0.8279	0.0342	1	0	22		2.60317	0.45	0.55	0.0454	1	0	55		3.04067	0.5034	0.4966	0.0476	1	0	56		3.0615	0.2444	0.7556	0.0453	1	0	23
1.88442	0.1639	0.8361	0.0335	1	0	21		2.61359	0.4417	0.5583	0.0453	1	0	54		3.07192	0.4851	0.5149	0.0476	2	0	55		3.124	0.2333	0.7667	0.0446	1	0	22
1.89484	0.1557	0.8443	0.0328	1	0	20		2.624	0.4333	0.5667	0.0452	1	0	53		3.08234	0.476	0.524	0.0476	1	0	53		3.13442	0.2111	0.7889	0.043	2	0	21
1.91567	0.1475	0.8525	0.0321	1	0	19		2.64484	0.4167	0.5833	0.045	2	0	52		3.124	0.4668	0.5332	0.0475	1	0	52		3.1865	0.2	0.8	0.0422	1	0	19
1.9365	0.1393	0.8607	0.0314	1	0	18		2.65525	0.4	0.6	0.0447	2	0	50		3.21775	0.4577	0.5423	0.0475	1	0	51		3.249	0.1889	0.8111	0.0413	1	0	18
1.98859	0.1311	0.8689	0.0306	1	0	17		2.67609	0.3917	0.6083	0.0446	1	0	48		3.23859	0.4394	0.5606	0.0473	2	0	50		3.25942	0.1778	0.8222	0.0403	1	0	17
2.07192	0.123	0.877	0.0297	1	0	16		2.69692	0.375	0.625	0.0442	2	0	47		3.25942	0.4302	0.5698	0.0472	1	0	48		3.28025	0.1667	0.8333	0.0393	1	0	16
2.13442	0.1148	0.8852	0.0289	1	0	15		2.70734	0.3667	0.6333	0.044	1	0	45		3.26984	0.4119	0.5881	0.0469	2	0	47		3.3115	0.1556	0.8444	0.0382	1	0	15
2.15525	0.1066	0.8934	0.0279	1	0	14		2.71775	0.3583	0.6417	0.0438	1	0	44		3.34275	0.4027	0.5973	0.0468	1	0	45		3.32192	0.1333	0.8667	0.0358	2	0	14
2.16567	0.0902	0.9098	0.0259	2	0	13		2.73859	0.35	0.65	0.0435	1	0	43		3.38442	0.3936	0.6064	0.0466	1	0	44		3.42609	0.1222	0.8778	0.0345	1	0	12
2.1865	0.0738	0.9262	0.0237	2	0	11		2.75942	0.3333	0.6667	0.043	2	0	42		3.39484	0.3844	0.6156	0.0464	1	0	43		3.4365	0.1	0.9	0.0316	2	0	11
2.249	0.0656	0.9344	0.0224	1	0	9		2.79067	0.3167	0.6833	0.0425	2	0	40		3.41567	0.3753	0.6247	0.0462	1	0	42		3.47817	0.0778	0.9222	0.0282	2	0	9
2.28025	0.0574	0.9426	0.0211	1	0	8		2.80109	0.3083	0.6917	0.0422	1	0	38		3.4365	0.357	0.643	0.0457	2	0	41		3.60317	0.0667	0.9333	0.0263	1	0	7
2.38442	0.0492	0.9508	0.0196	1	0	7		2.83234	0.3	0.7	0.0418	1	0	37		3.499	0.3478	0.6522	0.0455	1	0	39		3.61359	0.0556	0.9444	0.0241	1	0	6
2.44692	0.041	0.959	0.0179	1	0	6		2.86359	0.2917	0.7083	0.0415	1	0	36		3.50942	0.3387	0.6613	0.0452	1	0	38		3.72817	0.0444	0.9556	0.0217	1	0	5
2.51984	0.0328	0.9672	0.0161	1	0	5		2.874	0.2833	0.7167	0.0411	1	0	35		3.51984	0.3295	0.6705	0.0449	1	0	37		4.10317	0.0333	0.9667	0.0189	1	0	4
2.54067	0.0246	0.9754	0.014	1	0	4		2.88442	0.275	0.725	0.0408	1	0	34		3.58234	0.3204	0.6796	0.0445	1	0	36		4.124	0.0222	0.9778	0.0155	1	0	3
2.70734	0.0164	0.9836	0.0115	1	0	3		2.89484	0.2667	0.7333	0.0404	1	0	33		3.59275	0.3021	0.6979	0.0438	2	0	35		4.14484	0.0111	0.9889	0.011	1	0	2
2.83234	0.0082	0.9918	0.0082	1	0	2		2.94692	0.2583	0.7417	0.04	1	0	32		3.624	0.2746	0.7254	0.0426	3	0	33		4.25942	0	1	0	1	0	1
3.374	0	1	0	1	0	1		2.96775	0.25	0.75	0.0395	1	0	31		3.63442	0.2654	0.7346	0.0422	1	0	30
								2.97817	0.2333	0.7667	0.0386	2	0	30		3.67609	0.2563	0.7437	0.0417	1	0	29
								2.98859	0.225	0.775	0.0381	1	0	28		3.70734	0.2471	0.7529	0.0412	1	0	28
								3.00942	0.2167	0.7833	0.0376	1	0	27		3.749	0.238	0.762	0.0407	1	0	27
								3.03025	0.2083	0.7917	0.0371	1	0	26		3.76984	0.2288	0.7712	0.0401	1	0	26
								3.10317	0.2	0.8	0.0365	1	0	25		3.82192	0.2197	0.7803	0.0396	1	0	25
								3.15525	0.1917	0.8083	0.0359	1	0	24		3.83234	0.2105	0.7895	0.039	1	0	24
								3.1865	0.1833	0.8167	0.0353	1	0	23		3.89484	0.2014	0.7986	0.0383	1	0	23
								3.19692	0.175	0.825	0.0347	1	0	22		3.91567	0.1922	0.8078	0.0377	1	0	22
								3.22817	0.1667	0.8333	0.034	1	0	21		4.00942	0.1831	0.8169	0.037	1	0	21
								3.23859	0.1583	0.8417	0.0333	1	0	20		4.08234	0.1648	0.8352	0.0355	2	0	20
								3.25942	0.15	0.85	0.0326	1	0	19		4.09275	0.1556	0.8444	0.0346	1	0	18
								3.3115	0.1417	0.8583	0.0318	1	0	18		4.15525	0.1465	0.8535	0.0338	1	0	17
								3.33234	0.1333	0.8667	0.031	1	0	17		4.20734	0.1281	0.8719	0.032	2	0	16
								3.38442	0.125	0.875	0.0302	1	0	16		4.21775	0.119	0.881	0.031	1	0	14
								3.44692	0.1167	0.8833	0.0293	1	0	15		4.23859	0.1098	0.8902	0.0299	1	0	13
								3.48859	0.1083	0.8917	0.0284	1	0	14		4.39484	0.1007	0.8993	0.0288	1	0	12
								3.64484	0.1	0.9	0.0274	1	0	13		4.46775	0.0915	0.9085	0.0276	1	0	11
								3.73859	0.0917	0.9083	0.0263	1	0	12		4.499	0.0824	0.9176	0.0263	1	0	10
								3.749	0.0833	0.9167	0.0252	1	0	11		4.53025	0.0732	0.9268	0.0249	1	0	9
								3.78025	0.075	0.925	0.024	1	0	10		4.72817	0.0641	0.9359	0.0234	1	0	8
								3.80109	0.0583	0.9417	0.0214	2	0	9		4.749	0.0549	0.9451	0.0218	1	0	7
								3.83234	0.05	0.95	0.0199	1	0	7		5.22817	0.0458	0.9542	0.02	1	0	6
								3.9365	0.0417	0.9583	0.0182	1	0	6		5.33234	0.0366	0.9634	0.018	1	0	5
								3.98859	0.0333	0.9667	0.0164	1	0	5		5.34275	0.0275	0.9725	0.0156	1	0	4
								4.01984	0.025	0.975	0.0143	1	0	4		5.38442	0.0183	0.9817	0.0128	1	0	3
								4.0615	0.0167	0.9833	0.0117	1	0	3		5.54067	0.0092	0.9908	0.0091	1	0	2
								4.4365	0.0083	0.9917	0.0083	1	0	2		5.58234	0	1	0	1	0	1
								4.57192	0	1	0	1	0	1

## Sheet: Figure 3J
Figure 3J
wild type 20°C								gcy-23(oy150) gcy-8(oy44) gcy-18(nj38) 20°C
Age at Death (d)	Survival	Failure	SurvStdErr	Number failed	Number censored	At Risk		Age at Death (d)	Survival	Failure	SurvStdErr	Number failed	Number censored	At Risk
0	1	0	0	0	0	153		0	1	0	0	0	0	145
0.44175	1	0	0	0	1	153		0.11883	0.9931	0.0069	0.0069	1	0	145
0.69175	1	0	0	0	1	152		1.04591	0.9862	0.0138	0.0097	1	0	144
0.79591	0.9934	0.0066	0.0066	1	0	151		1.07716	0.9793	0.0207	0.0118	1	0	143
0.82716	0.9868	0.0132	0.0093	1	0	150		1.17091	0.9724	0.0276	0.0136	1	0	142
0.83758	0.9801	0.0199	0.0114	1	0	149		1.33758	0.9655	0.0345	0.0152	1	0	141
1.00425	0.9669	0.0331	0.0146	2	0	148		1.37925	0.9517	0.0483	0.0178	2	0	140
1.05633	0.9603	0.0397	0.0159	1	0	146		1.56675	0.9448	0.0552	0.019	1	0	138
1.10841	0.9603	0.0397	0.0159	0	1	145		1.58758	0.9379	0.0621	0.02	1	0	137
1.1605	0.9536	0.0464	0.0171	1	0	144		1.62925	0.931	0.069	0.021	1	0	136
1.19175	0.9469	0.0531	0.0183	1	0	143		1.69175	0.9241	0.0759	0.022	1	0	135
1.21258	0.9403	0.0597	0.0193	1	0	142		1.75425	0.9172	0.0828	0.0229	1	0	134
1.25425	0.9336	0.0664	0.0203	1	0	141		1.7855	0.9103	0.0897	0.0237	1	0	133
1.26466	0.9269	0.0731	0.0212	1	0	140		1.83758	0.9034	0.0966	0.0245	1	0	132
1.29591	0.9203	0.0797	0.0221	1	0	139		1.85841	0.8966	0.1034	0.0253	1	0	131
1.37925	0.9136	0.0864	0.0229	1	0	138		1.87925	0.8897	0.1103	0.026	1	0	130
1.38966	0.9069	0.0931	0.0237	1	0	137		1.88966	0.8759	0.1241	0.0274	2	0	129
1.4105	0.9002	0.0998	0.0244	1	0	136		1.93133	0.869	0.131	0.028	1	0	127
1.42091	0.8736	0.1264	0.0271	4	0	135		2.00425	0.8552	0.1448	0.0292	2	0	126
1.45216	0.8669	0.1331	0.0277	1	0	131		2.04591	0.8483	0.1517	0.0298	1	0	124
1.48341	0.8602	0.1398	0.0283	1	0	130		2.098	0.8414	0.1586	0.0303	1	0	123
1.49383	0.8402	0.1598	0.0299	3	0	129		2.10841	0.8345	0.1655	0.0309	1	0	122
1.50425	0.8336	0.1664	0.0304	1	0	126		2.13966	0.8276	0.1724	0.0314	1	0	121
1.5355	0.8269	0.1731	0.0309	1	0	125		2.18133	0.8138	0.1862	0.0323	2	0	120
1.54591	0.8069	0.1931	0.0322	3	0	124		2.25425	0.7655	0.2345	0.0352	7	0	118
1.58758	0.7802	0.2198	0.0338	4	0	121		2.26466	0.7586	0.2414	0.0355	1	0	111
1.61883	0.7135	0.2865	0.0369	10	0	117		2.29591	0.7379	0.2621	0.0365	3	0	110
1.62925	0.7069	0.2931	0.0372	1	0	107		2.31675	0.7241	0.2759	0.0371	2	0	107
1.63966	0.6935	0.3065	0.0376	2	0	106		2.35841	0.7103	0.2897	0.0377	2	0	105
1.65008	0.6869	0.3131	0.0379	1	0	104		2.37925	0.6897	0.3103	0.0384	3	0	103
1.6605	0.6669	0.3331	0.0385	3	0	103		2.38966	0.6828	0.3172	0.0386	1	0	100
1.67091	0.6602	0.3398	0.0387	1	0	100		2.40008	0.6759	0.3241	0.0389	1	0	99
1.68133	0.6535	0.3465	0.0388	1	0	99		2.4105	0.669	0.331	0.0391	1	0	98
1.69175	0.6402	0.3598	0.0392	2	0	98		2.42091	0.6621	0.3379	0.0393	1	0	97
1.70216	0.6268	0.3732	0.0395	2	0	96		2.43133	0.6483	0.3517	0.0397	2	0	96
1.71258	0.6135	0.3865	0.0398	2	0	94		2.46258	0.6345	0.3655	0.04	2	0	94
1.76466	0.5668	0.4332	0.0405	7	0	92		2.473	0.6276	0.3724	0.0401	1	0	92
1.7855	0.5535	0.4465	0.0406	2	0	85		2.48341	0.6138	0.3862	0.0404	2	0	91
1.79591	0.5401	0.4599	0.0407	2	0	83		2.51466	0.6138	0.3862	0.0404	0	2	89
1.80633	0.5201	0.4799	0.0408	3	0	81		2.52508	0.5785	0.4215	0.0411	5	0	87
1.82716	0.5001	0.4999	0.0408	3	0	78		2.5355	0.5715	0.4285	0.0412	1	0	82
1.83758	0.4935	0.5065	0.0408	1	0	75		2.55633	0.5644	0.4356	0.0413	1	0	81
1.848	0.4601	0.5399	0.0407	5	0	74		2.58758	0.5574	0.4426	0.0413	1	1	80
1.85841	0.4468	0.5532	0.0406	2	0	69		2.598	0.5502	0.4498	0.0414	1	2	78
1.87925	0.4401	0.5599	0.0405	1	0	67		2.63966	0.5502	0.4498	0.0414	0	1	75
1.90008	0.4268	0.5732	0.0404	2	0	66		2.68133	0.5056	0.4944	0.0419	6	0	74
1.92091	0.4134	0.5866	0.0402	2	0	64		2.69175	0.4907	0.5093	0.042	2	0	68
1.94175	0.4001	0.5999	0.04	2	0	62		2.723	0.4833	0.5167	0.042	1	1	66
1.973	0.3868	0.6132	0.0398	2	0	60		2.73341	0.4606	0.5394	0.042	3	0	64
1.98341	0.3601	0.6399	0.0392	4	0	58		2.75425	0.4531	0.5469	0.042	1	0	61
1.99383	0.3534	0.6466	0.039	1	0	54		2.76466	0.4455	0.5545	0.0419	1	0	60
2.01466	0.3468	0.6532	0.0389	1	0	53		2.79591	0.438	0.562	0.0419	1	0	59
2.02508	0.3068	0.6932	0.0377	6	0	52		2.80633	0.4304	0.5696	0.0419	1	0	58
2.0355	0.3001	0.6999	0.0374	1	0	46		2.81675	0.4153	0.5847	0.0417	2	1	57
2.04591	0.2934	0.7066	0.0372	1	0	45		2.85841	0.3999	0.6001	0.0416	2	0	54
2.05633	0.2867	0.7133	0.0369	1	0	44		2.88966	0.3923	0.6077	0.0415	1	0	52
2.06675	0.2734	0.7266	0.0364	2	0	43		2.92091	0.3846	0.6154	0.0414	1	0	51
2.07716	0.2667	0.7333	0.0361	1	0	41		2.93133	0.3769	0.6231	0.0413	1	0	50
2.098	0.2534	0.7466	0.0355	2	0	40		2.95216	0.3615	0.6385	0.041	2	0	49
2.12925	0.2467	0.7533	0.0352	1	0	38		2.96258	0.3461	0.6539	0.0407	2	0	47
2.13966	0.2401	0.7599	0.0349	1	0	37		2.98341	0.3384	0.6616	0.0405	1	0	45
2.15008	0.2201	0.7799	0.0338	3	0	36		2.99383	0.323	0.677	0.0401	2	0	44
2.18133	0.2134	0.7866	0.0335	1	0	33		3.00425	0.3153	0.6847	0.0398	1	0	42
2.19175	0.1934	0.8066	0.0323	3	0	32		3.01466	0.3	0.7	0.0394	2	0	41
2.223	0.18	0.82	0.0314	2	0	29		3.02508	0.2923	0.7077	0.0391	1	0	39
2.23341	0.1734	0.8266	0.0309	1	0	27		3.0355	0.2615	0.7385	0.0379	4	0	38
2.24383	0.1667	0.8333	0.0304	1	0	26		3.06675	0.2538	0.7462	0.0375	1	0	34
2.25425	0.1534	0.8466	0.0294	2	0	25		3.07716	0.2461	0.7539	0.0372	1	0	33
2.26466	0.1467	0.8533	0.0289	1	0	23		3.10841	0.2384	0.7616	0.0368	1	0	32
2.30633	0.14	0.86	0.0283	1	2	22		3.11883	0.2307	0.7693	0.0364	1	0	31
2.31675	0.1253	0.8747	0.0272	2	0	19		3.15008	0.2154	0.7846	0.0356	2	0	30
2.33758	0.1179	0.8821	0.0266	1	0	17		3.1605	0.2077	0.7923	0.0351	1	0	28
2.35841	0.1032	0.8968	0.0252	2	0	16		3.20216	0.1769	0.8231	0.0331	4	0	27
2.37925	0.1032	0.8968	0.0252	0	1	14		3.21258	0.1692	0.8308	0.0326	1	0	23
2.38966	0.1032	0.8968	0.0252	0	1	13		3.26466	0.1615	0.8385	0.032	1	0	22
2.4105	0.0946	0.9054	0.0245	1	0	12		3.27508	0.1461	0.8539	0.0307	2	0	21
2.42091	0.086	0.914	0.0238	1	0	11		3.2855	0.1308	0.8692	0.0294	2	0	19
2.46258	0.086	0.914	0.0238	0	1	10		3.30633	0.1231	0.8769	0.0286	1	0	17
2.473	0.0764	0.9236	0.023	1	0	9		3.36883	0.1	0.9	0.0262	3	0	16
2.48341	0.0573	0.9427	0.0208	2	0	8		3.40008	0.0923	0.9077	0.0253	1	0	13
2.54591	0.0478	0.9522	0.0194	1	0	6		3.4105	0.0846	0.9154	0.0243	1	0	12
2.56675	0.0382	0.9618	0.0177	1	0	5		3.473	0.0769	0.9231	0.0233	1	0	11
2.82716	0.0287	0.9713	0.0157	1	0	4		3.51466	0.0692	0.9308	0.0222	1	0	10
2.86883	0.0191	0.9809	0.013	1	0	3		3.61883	0.0615	0.9385	0.021	1	0	9
2.93133	0.0096	0.9904	0.0094	1	0	2		3.65008	0.0538	0.9462	0.0197	1	0	8
3.21258	0	1	0	1	0	1		3.70216	0.0461	0.9539	0.0184	1	0	7
								3.95216	0.0385	0.9615	0.0168	1	0	6
								4.07716	0.0308	0.9692	0.0151	1	0	5
								4.098	0.0231	0.9769	0.0132	1	0	4
								4.1605	0.0154	0.9846	0.0108	1	0	3
								4.49383	0.0077	0.9923	0.0077	1	0	2
								4.6605	0	1	0	1	0	1

## Sheet: Figure 3K
Figure 3K
wild type 25°C								gcy-23(oy150) gcy-8(oy44) gcy-18(nj38) 25°C
Age at Death (d)	Survival	Failure	SurvStdErr	Number failed	Number censored	At Risk		Age at Death (d)	Survival	Failure	SurvStdErr	Number failed	Number censored	At Risk
0	1	0	0	0	0	109		0	1	0	0	0	0	66
0.68441	0.9908	0.0092	0.0091	1	0	109		0.68441	0.9848	0.0152	0.015	1	0	66
0.77816	0.9817	0.0183	0.0129	1	0	108		0.70524	0.9697	0.0303	0.0211	1	0	65
0.79899	0.9725	0.0275	0.0157	1	0	107		0.72608	0.9545	0.0455	0.0256	1	0	64
0.86149	0.9633	0.0367	0.018	1	0	106		0.74691	0.9394	0.0606	0.0294	1	0	63
0.88233	0.9541	0.0459	0.02	1	0	105		0.76774	0.9242	0.0758	0.0326	1	0	62
0.89274	0.9358	0.0642	0.0235	2	0	104		0.83024	0.8939	0.1061	0.0379	2	0	61
0.91358	0.9174	0.0826	0.0264	2	0	102		0.85108	0.8636	0.1364	0.0422	2	0	59
0.93441	0.8991	0.1009	0.0289	2	0	100		0.87191	0.8485	0.1515	0.0441	1	0	57
0.94483	0.8716	0.1284	0.032	3	0	98		0.89274	0.7727	0.2273	0.0516	5	0	56
0.96566	0.8624	0.1376	0.033	1	0	95		0.91358	0.7424	0.2576	0.0538	2	0	51
0.97608	0.844	0.156	0.0348	2	0	94		0.93441	0.6364	0.3636	0.0592	7	0	49
0.98649	0.8349	0.1651	0.0356	1	0	92		0.95524	0.6212	0.3788	0.0597	1	0	42
1.00733	0.8073	0.1927	0.0378	3	0	91		0.97608	0.5758	0.4242	0.0608	3	0	41
1.02816	0.789	0.211	0.0391	2	0	88		0.99691	0.5606	0.4394	0.0611	1	0	38
1.03858	0.7339	0.2661	0.0423	6	0	86		1.01774	0.5303	0.4697	0.0614	2	0	37
1.04899	0.7156	0.2844	0.0432	2	0	80		1.03858	0.5152	0.4848	0.0615	1	0	35
1.06983	0.6881	0.3119	0.0444	3	0	78		1.05941	0.4091	0.5909	0.0605	7	0	34
1.08024	0.6789	0.3211	0.0447	1	0	75		1.10108	0.303	0.697	0.0566	7	0	27
1.09066	0.6697	0.3303	0.045	1	0	74		1.12191	0.2879	0.7121	0.0557	1	0	20
1.10108	0.6422	0.3578	0.0459	3	0	73		1.14274	0.2273	0.7727	0.0516	4	0	19
1.11149	0.6147	0.3853	0.0466	3	0	70		1.18441	0.1364	0.8636	0.0422	6	0	15
1.13233	0.6055	0.3945	0.0468	1	0	67		1.22608	0.1061	0.8939	0.0379	2	0	9
1.14274	0.5596	0.4404	0.0475	5	0	66		1.24691	0.0909	0.9091	0.0354	1	0	7
1.15316	0.5321	0.4679	0.0478	3	0	61		1.26774	0.0606	0.9394	0.0294	2	0	6
1.16358	0.5229	0.4771	0.0478	1	0	58		1.30941	0.0303	0.9697	0.0211	2	0	4
1.17399	0.4954	0.5046	0.0479	3	0	57		1.43441	0.0152	0.9848	0.015	1	0	2
1.18441	0.4771	0.5229	0.0478	2	0	54		1.72608	0	1	0	1	0	1
1.19483	0.4587	0.5413	0.0477	2	0	52
1.20524	0.4404	0.5596	0.0475	2	0	50
1.21566	0.4128	0.5872	0.0472	3	0	48
1.23649	0.3853	0.6147	0.0466	3	0	45
1.24691	0.367	0.633	0.0462	2	0	42
1.25733	0.3486	0.6514	0.0456	2	0	40
1.26774	0.3028	0.6972	0.044	5	0	38
1.27816	0.2752	0.7248	0.0428	3	0	33
1.28858	0.2661	0.7339	0.0423	1	0	30
1.29899	0.2477	0.7523	0.0413	2	0	29
1.31983	0.2202	0.7798	0.0397	3	0	27
1.33024	0.1927	0.8073	0.0378	3	0	24
1.34066	0.1651	0.8349	0.0356	3	0	21
1.35108	0.156	0.844	0.0348	1	0	18
1.37191	0.1468	0.8532	0.0339	1	0	17
1.40316	0.1376	0.8624	0.033	1	0	16
1.42399	0.1284	0.8716	0.032	1	0	15
1.44483	0.1193	0.8807	0.031	1	0	14
1.45524	0.0734	0.9266	0.025	5	0	13
1.46566	0.055	0.945	0.0218	2	0	8
1.48649	0.0459	0.9541	0.02	1	0	6
1.49691	0.0367	0.9633	0.018	1	0	5
1.56983	0.0275	0.9725	0.0157	1	0	4
1.62191	0.0183	0.9817	0.0129	1	0	3
1.65316	0.0092	0.9908	0.0091	1	0	2
1.74691	0	1	0	1	0	1

## Sheet: Figure 3L
Figure 3L
wild type 20°C								gcy-8(oy44) 20°C								gcy-18(nj38) 20°C								gcy-23(oy150) 20°C
Age at Death (d)	Survival	Failure	SurvStdErr	Number failed	Number censored	At Risk		Age at Death (d)	Survival	Failure	SurvStdErr	Number failed	Number censored	At Risk		Age at Death (d)	Survival	Failure	SurvStdErr	Number failed	Number censored	At Risk		Age at Death (d)	Survival	Failure	SurvStdErr	Number failed	Number censored	At Risk
0	1	0	0	0	0	62		0	1	0	0	0	0	51		0	1	0	0	0	0	96		0	1	0	0	0	0	70
0.84523	0.9839	0.0161	0.016	1	0	62		1.35565	0.9804	0.0196	0.0194	1	0	51		2.0119	0.9792	0.0208	0.0146	2	0	96		1.55356	0.9857	0.0143	0.0142	1	0	70
1.54315	0.9677	0.0323	0.0224	1	0	61		1.48065	0.9608	0.0392	0.0272	1	0	50		2.10565	0.9688	0.0313	0.0178	1	0	94		1.6369	0.9714	0.0286	0.0199	1	0	69
1.60565	0.9516	0.0484	0.0273	1	0	60		1.52231	0.9412	0.0588	0.0329	1	0	49		2.14731	0.9583	0.0417	0.0204	1	0	93		1.86606	0.9571	0.0429	0.0242	1	0	68
1.6369	0.9194	0.0806	0.0346	2	0	59		1.54315	0.9216	0.0784	0.0376	1	0	48		2.23065	0.9479	0.0521	0.0227	1	0	92		1.8869	0.9286	0.0714	0.0308	2	0	67
1.67856	0.8871	0.1129	0.0402	2	0	57		1.60565	0.8627	0.1373	0.0482	3	0	47		2.29315	0.9375	0.0625	0.0247	1	0	91		1.91815	0.9	0.1	0.0359	2	0	65
1.70981	0.871	0.129	0.0426	1	0	55		1.64731	0.8431	0.1569	0.0509	1	0	44		2.31398	0.9271	0.0729	0.0265	1	0	90		1.92856	0.8857	0.1143	0.038	1	0	63
1.72023	0.8548	0.1452	0.0447	1	0	54		1.68898	0.8235	0.1765	0.0534	1	0	43		2.3244	0.9167	0.0833	0.0282	1	0	89		2.00148	0.8714	0.1286	0.04	1	0	62
1.75148	0.8387	0.1613	0.0467	1	0	53		1.70981	0.8039	0.1961	0.0556	1	0	42		2.34523	0.9062	0.0938	0.0297	1	0	88		2.04315	0.8429	0.1571	0.0435	2	0	61
1.7619	0.8226	0.1774	0.0485	1	0	52		1.73065	0.7843	0.2157	0.0576	1	0	41		2.35565	0.8958	0.1042	0.0312	1	0	87		2.09523	0.8143	0.1857	0.0465	2	0	59
1.79315	0.7903	0.2097	0.0517	2	0	51		1.77231	0.7647	0.2353	0.0594	1	0	40		2.43898	0.8854	0.1146	0.0325	1	0	86		2.12648	0.7857	0.2143	0.049	2	0	57
1.80356	0.7581	0.2419	0.0544	2	0	49		1.79315	0.7451	0.2549	0.061	1	0	39		2.50148	0.8542	0.1458	0.036	3	0	85		2.16815	0.7714	0.2286	0.0502	1	0	55
1.83481	0.7419	0.2581	0.0556	1	0	47		1.81398	0.7255	0.2745	0.0625	1	0	38		2.55356	0.8437	0.1563	0.0371	1	0	82		2.17856	0.7571	0.2429	0.0513	1	0	54
1.84523	0.7097	0.2903	0.0576	2	0	46		1.85565	0.6667	0.3333	0.066	3	0	37		2.56398	0.8333	0.1667	0.038	1	0	81		2.20981	0.7143	0.2857	0.054	3	0	53
1.8869	0.6452	0.3548	0.0608	4	0	44		1.87648	0.6471	0.3529	0.0669	1	0	34		2.67856	0.8229	0.1771	0.039	1	0	80		2.22023	0.7	0.3	0.0548	1	0	50
1.90773	0.629	0.371	0.0613	1	0	40		1.95981	0.6275	0.3725	0.0677	1	0	33		2.68898	0.8125	0.1875	0.0398	1	0	79		2.29315	0.6857	0.3143	0.0555	1	0	49
1.92856	0.5968	0.4032	0.0623	2	0	39		2.02231	0.6078	0.3922	0.0684	1	0	32		2.70981	0.7708	0.2292	0.0429	4	0	78		2.30356	0.6714	0.3286	0.0561	1	0	48
1.95981	0.5645	0.4355	0.063	2	0	37		2.06398	0.5882	0.4118	0.0689	1	0	31		2.72023	0.7604	0.2396	0.0436	1	0	74		2.33481	0.6429	0.3571	0.0573	2	0	47
2.00148	0.5161	0.4839	0.0635	3	0	35		2.08481	0.5686	0.4314	0.0694	1	0	30		2.73065	0.7396	0.2604	0.0448	2	0	73		2.34523	0.5429	0.4571	0.0595	7	0	45
2.0119	0.4194	0.5806	0.0627	6	0	32		2.10565	0.549	0.451	0.0697	1	0	29		2.75148	0.7292	0.2708	0.0454	1	0	71		2.3869	0.5143	0.4857	0.0597	2	0	38
2.04315	0.3871	0.6129	0.0619	2	0	26		2.14731	0.5294	0.4706	0.0699	1	0	28		2.7619	0.7187	0.2813	0.0459	1	0	70		2.41815	0.4857	0.5143	0.0597	2	0	36
2.05356	0.3387	0.6613	0.0601	3	0	24		2.18898	0.5098	0.4902	0.07	1	0	27		2.79315	0.7083	0.2917	0.0464	1	0	69		2.42856	0.4571	0.5429	0.0595	2	0	34
2.08481	0.2903	0.7097	0.0576	3	0	21		2.20981	0.4706	0.5294	0.0699	2	0	26		2.83481	0.6875	0.3125	0.0473	2	0	68		2.45981	0.4429	0.5571	0.0594	1	0	32
2.09523	0.2581	0.7419	0.0556	2	0	18		2.23065	0.4314	0.5686	0.0694	2	0	24		2.84523	0.6771	0.3229	0.0477	1	0	66		2.47023	0.4286	0.5714	0.0591	1	0	31
2.1369	0.2419	0.7581	0.0544	1	0	16		2.27231	0.4118	0.5882	0.0689	1	0	22		2.85565	0.6562	0.3438	0.0485	2	0	65		2.50148	0.4143	0.5857	0.0589	1	0	30
2.20981	0.2258	0.7742	0.0531	1	0	15		2.29315	0.3922	0.6078	0.0684	1	0	21		2.87648	0.6354	0.3646	0.0491	2	0	63		2.5119	0.3857	0.6143	0.0582	2	0	29
2.22023	0.2097	0.7903	0.0517	1	0	14		2.31398	0.3725	0.6275	0.0677	1	0	20		2.8869	0.6042	0.3958	0.0499	3	0	61		2.54315	0.3571	0.6429	0.0573	2	0	27
2.23065	0.1935	0.8065	0.0502	1	0	13		2.33481	0.3333	0.6667	0.066	2	0	19		2.89731	0.5937	0.4063	0.0501	1	0	58		2.5744	0.3429	0.6571	0.0567	1	0	25
2.25148	0.1774	0.8226	0.0485	1	0	12		2.37648	0.3137	0.6863	0.065	1	0	17		2.91815	0.5833	0.4167	0.0503	1	0	57		2.58481	0.3143	0.6857	0.0555	2	0	24
2.2619	0.1613	0.8387	0.0467	1	0	11		2.39731	0.2941	0.7059	0.0638	1	0	16		2.92856	0.5729	0.4271	0.0505	1	0	56		2.59523	0.2857	0.7143	0.054	2	0	22
2.29315	0.1452	0.8548	0.0447	1	0	10		2.41815	0.2549	0.7451	0.061	2	0	15		2.93898	0.5417	0.4583	0.0509	3	0	55		2.6369	0.2714	0.7286	0.0532	1	0	20
2.30356	0.129	0.871	0.0426	1	0	9		2.48065	0.2353	0.7647	0.0594	1	0	13		2.95981	0.5208	0.4792	0.051	2	0	52		2.66815	0.2429	0.7571	0.0513	2	0	19
2.33481	0.0968	0.9032	0.0375	2	0	8		2.54315	0.2157	0.7843	0.0576	1	0	12		3.00148	0.4896	0.5104	0.051	3	0	50		2.67856	0.2143	0.7857	0.049	2	0	17
2.3869	0.0806	0.9194	0.0346	1	0	6		2.62648	0.1961	0.8039	0.0556	1	0	11		3.03273	0.4792	0.5208	0.051	1	0	47		2.72023	0.2	0.8	0.0478	1	0	15
2.41815	0.0645	0.9355	0.0312	1	0	5		2.66815	0.1569	0.8431	0.0509	2	0	10		3.04315	0.4583	0.5417	0.0509	2	0	46		2.75148	0.1429	0.8571	0.0418	4	0	14
2.45981	0.0484	0.9516	0.0273	1	0	4		2.79315	0.1176	0.8824	0.0451	2	0	8		3.06398	0.4271	0.5729	0.0505	3	0	44		2.80356	0.1286	0.8714	0.04	1	0	10
2.55356	0.0323	0.9677	0.0224	1	0	3		2.83481	0.098	0.902	0.0416	1	0	6		3.08481	0.4062	0.5938	0.0501	2	0	41		2.87648	0.1143	0.8857	0.038	1	0	9
2.62648	0.0161	0.9839	0.016	1	0	2		3.02231	0.0784	0.9216	0.0376	1	0	5		3.14731	0.3854	0.6146	0.0497	2	0	39		2.8869	0.1	0.9	0.0359	1	0	8
2.91815	0	1	0	1	0	1		3.10565	0.0392	0.9608	0.0272	2	0	4		3.1994	0.375	0.625	0.0494	1	0	37		3.08481	0.0857	0.9143	0.0335	1	0	7
								3.45981	0.0196	0.9804	0.0194	1	0	2		3.20981	0.3646	0.6354	0.0491	1	0	36		3.17856	0.0714	0.9286	0.0308	1	0	6
								3.70981	0	1	0	1	0	1		3.23065	0.3437	0.6563	0.0485	2	0	35		3.20981	0.0571	0.9429	0.0277	1	0	5
																3.25148	0.3333	0.6667	0.0481	1	0	33		3.29315	0.0429	0.9571	0.0242	1	0	4
																3.27231	0.3125	0.6875	0.0473	2	0	32		3.50148	0.0286	0.9714	0.0199	1	0	3
																3.29315	0.2812	0.7188	0.0459	3	0	30		3.58481	0.0143	0.9857	0.0142	1	0	2
																3.31398	0.2604	0.7396	0.0448	2	0	27		3.67856	0	1	0	1	0	1
																3.33481	0.2396	0.7604	0.0436	2	0	25
																3.34523	0.2292	0.7708	0.0429	1	0	23
																3.35565	0.2187	0.7813	0.0422	1	0	22
																3.37648	0.1875	0.8125	0.0398	3	0	21
																3.41815	0.1771	0.8229	0.039	1	0	18
																3.42856	0.1562	0.8438	0.0371	2	0	17
																3.43898	0.1458	0.8542	0.036	1	0	15
																3.45981	0.1354	0.8646	0.0349	1	0	14
																3.48065	0.1146	0.8854	0.0325	2	0	13
																3.5119	0.1042	0.8958	0.0312	1	0	11
																3.52231	0.0937	0.9063	0.0297	1	0	10
																3.59523	0.0833	0.9167	0.0282	1	0	9
																3.60565	0.0729	0.9271	0.0265	1	0	8
																3.72023	0.0521	0.9479	0.0227	2	0	7
																3.75148	0.0417	0.9583	0.0204	1	0	5
																4.02231	0.0313	0.9688	0.0178	1	0	4
																4.08481	0.0208	0.9792	0.0146	1	0	3
																4.09523	0.0104	0.9896	0.0104	1	0	2
																4.6369	0	1	0	1	0	1
