# Supplementary material for: Neuronal temperature perception induces specific defenses that enable C. elegans to cope with the enhanced reactivity of hydrogen peroxide at high temperature
Source: eLife. 2022 Oct 13;11:e78941. doi: 10.7554/eLife.78941 (PMC9635881; doi:10.7554/eLife.78941)
Supplement: Figure 3—source data 2. [file elife-78941-fig3-data2.xlsx]

## Sheet: Figure 3
Figure 3F
Worm genotype	Temperature	Treatment	Alive	Dead
wild type	20°C	control	174	0
AFD ablated	20°C	control	103	0
wild type	20°C	E. faecium supernatant	76	131
AFD ablated	20°C	E. faecium supernatant	110	40
Figure 3I
Worm genotype	Temperature	Treatment	Alive	Dead
wild type	20°C → 20°C	E. faecium supernatant	76	127
wild type	25°C → 20°C	E. faecium supernatant	156	55
AFD ablated	20°C → 20°C	E. faecium supernatant	151	59
AFD ablated	25°C → 20°C	E. faecium supernatant	139	71
