# Supplementary material for: Neuronal temperature perception induces specific defenses that enable C. elegans to cope with the enhanced reactivity of hydrogen peroxide at high temperature
Source: eLife. 2022 Oct 13;11:e78941. doi: 10.7554/eLife.78941 (PMC9635881; doi:10.7554/eLife.78941)
Supplement: Figure 4—figure supplement 3—source data 1. [file elife-78941-fig4-figsupp3-data1.xlsx]

## Sheet: Figure 4S3
Figure 4S3
WormCat level 1	WormCat level 3	log2foldchange in WormCat level 3 gene-set expression [wild type 25°C / wild type 20°C]	log2foldchange in WormCat level 3 gene-set expression [AFD(-) 20°C / wild type 20°C]
Cell cycle	Cell cycle: APC	-0.415795	-1.34555
Cell cycle	Cell cycle: chromosome dynamics: CENP	-0.76155	-2.3948
Cell cycle	Cell cycle: chromosome dynamics: condensin	-0.395792	-1.40552
Cell cycle	Cell cycle: chromosome dynamics: kinase	-0.556632	-2.01986
Cell cycle	Cell cycle: chromosome dynamics: kinetochore protein	-0.422234	-2.06137
Cell cycle	Cell cycle: chromosome dynamics: meiotic functions	-0.495651	-1.91481
Cell cycle	Cell cycle: chromosome dynamics: SMC	-0.311957	-1.13263
Cell cycle	Cell cycle: chromosome dynamics: unassigned	-0.538458	-1.40624
Cell cycle	Cell cycle: cyclin	-0.302909	-2.01798
Cell cycle	Cell cycle: kinase	-0.445783	-1.88019
Cell cycle	Cell cycle: meiotic/mitotic spindle	-0.389555	-1.53804
Cell cycle	Cell cycle: phosphatase	-0.303167	-2.35457
Cell cycle	Cell cycle: transcriptional regulator	-0.301427	-1.68652
Cell cycle	Cell cycle: unassigned	-0.400996	-1.31728
Chaperone	Chaperone: cyclophilin	-0.459568	-0.246007
Chaperone	Chaperone: DnaJ domain	-0.434727	-0.92614
Chaperone	Chaperone: prefoldin	-0.526447	-0.633446
Chaperone	Chaperone: T complex	-0.358639	-0.633698
Cilia	Cilia: IFT-B	-1.21374	0.0407628
Cilia	Cilia: unassigned	-0.418499	-0.581185
Cytoskeleton	Cytoskeleton: actin function: actin	-0.546703	-0.182374
Cytoskeleton	Cytoskeleton: centrosome: centriole	-0.396411	-1.36881
Cytoskeleton	Cytoskeleton: centrosome: kinase	-0.35574	-1.66271
Cytoskeleton	Cytoskeleton: centrosome: unassigned	-0.659275	-1.46937
Cytoskeleton	Cytoskeleton: claudin	-2.63609	1.30774
Cytoskeleton	Cytoskeleton: intermediate filament protein	-0.289912	1.42253
Cytoskeleton	Cytoskeleton: microtubule: binding	-0.299104	-0.824192
Cytoskeleton	Cytoskeleton: microtubule: tau tubulin kinase	-0.263602	0.913577
Cytoskeleton	Cytoskeleton: microtubule: tubulin	-0.301504	-0.28996
Cytoskeleton	Cytoskeleton: microtubule: tubulin modification	-0.257094	-0.39708
Cytoskeleton	Cytoskeleton: microtubule: unassigned	-0.367833	-0.572702
Cytoskeleton	Cytoskeleton: motor protein: dynein	-0.305784	-0.329065
Cytoskeleton	Cytoskeleton: motor protein: kinesin	-0.289388	-1.14008
Cytoskeleton	Cytoskeleton: paxillin	-0.864739	1.61018
Development	Development: general	-0.26681	-0.296939
Development	Development: somatic	-0.286102	-0.579095
DNA	DNA: repair	-0.471305	-1.34118
DNA	DNA: replication	-0.426499	-1.7665
DNA	DNA: telomere	-0.303844	-0.941279
DNA	DNA: transposon function	-0.69863	-2.53099
Extracellular material	Extracellular material: collagen	-0.95862	1.2227
Extracellular material	Extracellular material: cuticlin	-0.286346	1.37638
Extracellular material	Extracellular material: lectin	-0.329897	0.876759
Extracellular material	Extracellular material: mucin	-0.350255	-1.28853
Globin	Globin	-0.287901	2.24536
Lysosome	Lysosome: Vacuolar ATPase	-0.470487	0.504098
Metabolism	Metabolism: 1CC: methionine	-0.623998	-0.229555
Metabolism	Metabolism: 1CC: unassigned	-0.475684	-0.115597
Metabolism	Metabolism: amino acid: breakdown	-0.288355	1.05646
Metabolism	Metabolism: amino acid: synthesis	-0.261486	0.682583
Metabolism	Metabolism: amino acid: unassigned	-0.439346	1.16673
Metabolism	Metabolism: amino sugar	-0.283161	-0.887272
Metabolism	Metabolism: B12	-0.326873	-0.733194
Metabolism	Metabolism: carbonic anhydrase	-0.357507	2.06797
Metabolism	Metabolism: creatine kinase	-0.770397	0.705049
Metabolism	Metabolism: glycolysis	-0.293483	0.249288
Metabolism	Metabolism: lipid: CoA	-0.266865	-0.490904
Metabolism	Metabolism: lipid: unassigned	-0.29369	0.383346
Metabolism	Metabolism: mitochondria: chaperone	-0.8945	-1.00566
Metabolism	Metabolism: mitochondria: citric acid cycle	-0.423669	0.303867
Metabolism	Metabolism: mitochondria: complex I	-0.41265	0.212544
Metabolism	Metabolism: mitochondria: complex III	-0.570457	0.762685
Metabolism	Metabolism: mitochondria: complex IV	-0.452947	0.321176
Metabolism	Metabolism: mitochondria: complex V	-0.611216	0.594289
Metabolism	Metabolism: mitochondria: cytochrome c oxidase assembly factor	-0.786102	-0.203582
Metabolism	Metabolism: mitochondria: gene expression	-0.560754	-0.94759
Metabolism	Metabolism: mitochondria: iron sulfur assembly	-0.52152	-0.870878
Metabolism	Metabolism: mitochondria: morphology	-0.308194	-0.183519
Metabolism	Metabolism: mitochondria: protease	-0.594445	-0.278799
Metabolism	Metabolism: mitochondria: ribosome	-0.724315	-0.708779
Metabolism	Metabolism: mitochondria: RNA methyltransferase	-0.647642	-1.0741
Metabolism	Metabolism: mitochondria: translocase	-0.526343	-0.588351
Metabolism	Metabolism: mitochondria: transporter	-0.275801	-0.252729
Metabolism	Metabolism: mitochondria: ubiquinone	-0.499319	-0.214047
Metabolism	Metabolism: mitochondria: unassigned	-0.405728	-0.0894783
Metabolism	Metabolism: nicotinate and nicotinamide metabolism	-0.479974	-1.17611
Metabolism	Metabolism: nucleotide	-0.320618	0.0664232
Metabolism	Metabolism: pentose phosphate pathway	-0.389704	-0.103305
Metabolism	Metabolism: polyamine	-0.510708	0.793923
mRNA functions	mRNA functions: binding: KH	-0.601384	-0.735572
mRNA functions	mRNA functions: binding: PUF	-0.341582	-1.32295
mRNA functions	mRNA functions: binding: RBM	-0.566123	-0.88187
mRNA functions	mRNA functions: binding: unassigned	-0.631933	-1.0232
mRNA functions	mRNA functions: binding: ZF	-0.311466	-1.98432
mRNA functions	mRNA functions: methylation: cap	-0.36783	-0.984658
mRNA functions	mRNA functions: methylation: unassigned	-0.843174	-0.440168
mRNA functions	mRNA functions: processing: cold shock	-1.0751	-0.825171
mRNA functions	mRNA functions: processing: deadenylase	-0.657473	-1.93357
mRNA functions	mRNA functions: processing: decapping	-0.410602	-1.57496
mRNA functions	mRNA functions: processing: export	-0.541591	-0.957296
mRNA functions	mRNA functions: processing: helicase	-0.594749	-0.761843
mRNA functions	mRNA functions: processing: hnRNP	-0.29134	-0.76672
mRNA functions	mRNA functions: processing: LSM	-0.58604	-0.745504
mRNA functions	mRNA functions: processing: NMD	-0.317541	-1.04642
mRNA functions	mRNA functions: processing: nuclease	-0.42499	-0.286372
mRNA functions	mRNA functions: processing: polyadenylation	-0.352085	-0.926216
mRNA functions	mRNA functions: processing: RNA exosome	-0.671938	-1.00315
mRNA functions	mRNA functions: processing: snRNP	-0.522728	-1.01819
mRNA functions	mRNA functions: processing: splicing	-0.633186	-1.20439
mRNA functions	mRNA functions: processing: unassigned	-0.434474	-0.537189
Muscle function	Muscle function	-0.47626	0.86141
Neuronal function	Neuronal function: transcription factor	-0.336802	-1.41057
Non-coding RNA	Non-coding RNA: small RNA: argonaute	-0.341154	-0.802129
Non-coding RNA	Non-coding RNA: small RNA: unassigned	-0.325525	-0.850048
Non-coding RNA	Non-coding RNA: snoRNA	-0.496051	2.06004
Non-coding RNA	Non-coding RNA: tRNA: methylation	-0.725557	-0.673253
Non-coding RNA	Non-coding RNA: tRNA: production	-0.560086	-0.519126
Nuclear pore	Nuclear pore: structure	-0.469645	-1.29778
Nuclear pore	Nuclear pore: transport	-0.511197	-1.77756
Nucleic acid	Nucleic acid: binding: unassigned	-0.407953	-0.637883
Nucleic acid	Nucleic acid: binding: zinc finger	-0.374148	-0.73333
Nucleic acid	Nucleic acid: helicase	-1.0828	-2.57885
Peroxisome	Peroxisome: transporter	-0.322861	1.40793
Peroxisome	Peroxisome: unassigned	-0.378926	1.70834
Protein modification	Protein modification: acetyltransferase	-0.586076	-0.813046
Protein modification	Protein modification: acyltransferase	-0.728639	-1.2585
Protein modification	Protein modification: deacylase	-0.583289	-0.499167
Protein modification	Protein modification: methyltransferase	-0.419367	-0.649628
Protein modification	Protein modification: SUMO	-0.427137	-1.26337
Proteolysis proteasome	Proteolysis proteasome: 19S	-0.516764	-0.982265
Proteolysis proteasome	Proteolysis proteasome: 20S	-0.587668	-0.581216
Proteolysis proteasome	Proteolysis proteasome: E1	-0.541821	-0.7103
Proteolysis proteasome	Proteolysis proteasome: E2	-0.389976	-0.66325
Proteolysis proteasome	Proteolysis proteasome: E3: F box	-0.338445	0.0957306
Proteolysis proteasome	Proteolysis proteasome: NEDD	-0.502431	-0.74637
Proteolysis proteasome	Proteolysis proteasome: ubiquitin	-0.895237	-0.755217
Proteolysis proteasome	Proteolysis proteasome: ubiquitin domain	-0.258899	-0.166143
Proteolysis proteasome	Proteolysis proteasome: ubiquitin hydrolase	-0.619816	-0.983515
Proteolysis proteasome	Proteolysis proteasome: ubiquitin peptidase	-0.369342	-0.854782
Proteolysis proteasome	Proteolysis proteasome: unassigned	-0.482843	-1.06685
Ribosome	Ribosome: biogenesis	-0.795713	-0.53725
Ribosome	Ribosome: EIF	-0.598342	-0.108639
Ribosome	Ribosome: elongation	-0.647687	-0.86542
Ribosome	Ribosome: signal recognition	-0.309543	-0.758409
Ribosome	Ribosome: subunit	-1.16895	0.543678
Ribosome	Ribosome: unassigned	-0.603592	-0.360525
Signaling	Signaling: calcium: calmodulin	-0.256025	0.912889
Signaling	Signaling: calcium: unassigned	-0.341405	0.658486
Signaling	Signaling: CDK-like	-0.470657	-0.213426
Signaling	Signaling: lipid: phospholipase B	-0.321477	0.857427
Signaling	Signaling: lipid: phospholipase patatin	-0.642205	-0.303291
Signaling	Signaling: Notch	-0.270765	-1.70165
Signaling	Signaling: phosphatase: MAPK	-0.532568	-1.59397
Signaling	Signaling: phosphatase: unassigned	-0.267118	-0.709111
Signaling	Signaling: small GTPase: Rab	-0.290866	-0.36094
Signaling	Signaling: small GTPase: Ran	-0.46876	-1.34293
Signaling	Signaling: small GTPase: Rheb	-0.375692	-0.137546
Signaling	Signaling: TOR	-0.279679	-0.753431
Stress response	Stress response: detoxification: GST	-0.67958	1.15216
Stress response	Stress response: heat	-0.355213	-0.294398
Stress response	Stress response: osmotic	-0.563496	0.889367
Stress response	Stress response: pathogen: CUB	-0.415996	2.5837
Stress response	Stress response: pathogen: saposin	-0.308435	2.06248
Stress response	Stress response: thioredoxin	-0.36252	-0.306955
Stress response	Stress response: transcriptional regulator	-0.593372	0.257954
Trafficking	Trafficking: endocytosis: adaptin	-0.360211	0.0307306
Trafficking	Trafficking: ER/Golgi: ARF	-0.254897	0.0563123
Trafficking	Trafficking: ER/Golgi: ER unassigned	-0.373036	-0.159325
Trafficking	Trafficking: ER/Golgi: Golgi unassigned	-0.268499	-0.679823
Trafficking	Trafficking: ER/Golgi: oligomeric Golgi complex	-0.258826	-1.09963
Trafficking	Trafficking: ER/Golgi: trafficking protein particle complex	-0.345914	-0.823532
Trafficking	Trafficking: vesicle targeting/fusion: CHMP	-0.270322	-0.351284
Trafficking	Trafficking: vesicle targeting/fusion: CORVET/HOPS	-0.410132	-1.45089
Trafficking	Trafficking: vesicle targeting/fusion: ESCRT	-0.465289	-0.602038
Trafficking	Trafficking: vesicle targeting/fusion: SNARE	-0.294315	-0.538871
Transcription factor	Transcription factor: AP2	-0.470302	-2.13399
Transcription factor	Transcription factor: bZIP	-0.275787	0.506397
Transcription factor	Transcription factor: HMG box	-0.3477	0.830217
Transcription factor	Transcription factor: NF	-0.437187	-0.750175
Transcription factor	Transcription factor: unassigned	-0.399098	-0.415567
Transcription: chromatin	Transcription: chromatin modification: acetyltransferase	-0.340564	-0.910207
Transcription: chromatin	Transcription: chromatin modification: demethylase	-0.334719	-0.768337
Transcription: chromatin	Transcription: chromatin modification: REST	-0.605786	-1.69484
Transcription: chromatin	Transcription: chromatin modification: SWI/SNF	-0.41772	-1.39136
Transcription: chromatin	Transcription: chromatin modification: unassigned	-0.394506	-1.20935
Transcription: chromatin	Transcription: chromatin structure: HMG protein	-0.346992	-1.07296
Transcription: chromatin	Transcription: chromatin structure: unassigned	-0.58252	-1.52227
Transcription: general machinery	Transcription: general machinery: RNA Pol I: subunit	-0.52079	-1.00902
Transcription: general machinery	Transcription: general machinery: RNA Pol I: unassigned	-0.398391	-0.406249
Transcription: general machinery	Transcription: general machinery: RNA Pol II: CCR4/NOT	-0.327063	-0.682544
Transcription: general machinery	Transcription: general machinery: RNA Pol II: elongation	-0.484377	-0.636323
Transcription: general machinery	Transcription: general machinery: RNA Pol II: integrator	-0.523892	-0.898283
Transcription: general machinery	Transcription: general machinery: RNA Pol II: mediator	-0.291723	-1.06986
Transcription: general machinery	Transcription: general machinery: RNA Pol II: subunit	-0.466743	-1.00209
Transcription: general machinery	Transcription: general machinery: RNA Pol II: TFIIA	-0.502897	-3.20168
Transcription: general machinery	Transcription: general machinery: RNA Pol II: TFIIB	-0.337609	-1.31625
Transcription: general machinery	Transcription: general machinery: RNA Pol II: TFIID	-0.476896	-1.20828
Transcription: general machinery	Transcription: general machinery: RNA Pol II: TFIIE	-0.386839	-1.09847
Transcription: general machinery	Transcription: general machinery: RNA Pol II: TFIIF	-0.82764	-1.12119
Transcription: general machinery	Transcription: general machinery: RNA Pol II: TFIIH	-0.355987	-1.35883
Transcription: general machinery	Transcription: general machinery: RNA Pol II: unassigned	-0.405649	-1.19285
Transcription: general machinery	Transcription: general machinery: RNA Pol III	-0.602354	-0.720419
Transcription: general machinery	Transcription: general machinery: unassigned	-0.612368	-1.54808
Transcription: unassigned	Transcription: unassigned	-0.311247	-0.701029
Transmembrane protein	Transmembrane protein: seven transmembrane receptor: dmsr	-0.703303	0.396647
Transmembrane protein	Transmembrane protein: seven transmembrane receptor: sri	-1.47198	-1.54425
Transmembrane protein	Transmembrane protein: seven transmembrane receptor: srp	-0.276782	-0.63012
Transmembrane protein	Transmembrane protein: seven transmembrane receptor: srv	-0.329574	1.12995
Transmembrane protein	Transmembrane protein: seven transmembrane receptor: srx	-0.433522	4.68024
Transmembrane transport	Transmembrane transport: aquaporin	-0.340893	1.53577
Transmembrane transport	Transmembrane transport: mitochondrial: solute carrier	-0.385383	-0.0597793
Transmembrane transport	Transmembrane transport: monocarboxylate	-0.508776	0.581863
Unassigned	Unassigned	-0.285229	-0.0487939
Unassigned	Unassigned: ALS2cr12 domain	-1.31697	0.785263
Unassigned	Unassigned: MADF domain	-0.260374	-2.02304
Unassigned	Unassigned: meprin-associated Traf homology domain	-0.642529	1.79176
		-0.254884	0.330129
Transcription: chromatin	Transcription: chromatin modification: NURD	-0.249641	-0.717724
Signaling	Signaling: lipid: kinase inositol	-0.245881	-0.332377
Stress response	Stress response: oxidative	-0.24229	0.548904
Metabolism	Metabolism: short chain dehydrogenase	-0.238912	1.62471
DNA	DNA: helicase	-0.238241	-0.360379
Transmembrane protein	Transmembrane protein: ER	-0.237692	-0.201861
Proteolysis proteasome	Proteolysis proteasome: E1 like	-0.236852	-1.41993
Transcription factor	Transcription factor: GATA	-0.236057	0.365688
Transcription: chromatin	Transcription: chromatin modification: methyltransferase	-0.234253	-1.06952
Chaperone	Chaperone: unassigned	-0.233791	-0.0908136
Cytoskeleton	Cytoskeleton: actin function: binding	-0.232062	0.185227
Transcription factor	Transcription factor: CREB	-0.226487	-0.220993
Transcription factor	Transcription factor: forkhead	-0.22528	0.200298
Unassigned	Unassigned: BTB and MATH domain	-0.222209	-1.5855
Transmembrane transport	Transmembrane transport: acid sensing	-0.217791	1.63647
Development	Development: apoptosis	-0.216966	-0.287031
Metabolism	Metabolism: unassigned	-0.216648	0.494355
Proteolysis general	Proteolysis general: aspartate: unassigned	-0.216634	1.09066
Signaling	Signaling: small GTPase: unassigned	-0.214071	-0.342334
Metabolism	Metabolism: 1CC: transsulfuration	-0.213387	1.17258
Proteolysis proteasome	Proteolysis proteasome: ERAD	-0.212564	-0.558684
Unassigned	Unassigned: regulated by multiple stresses	-0.212319	0.301784
Proteolysis proteasome	Proteolysis proteasome: E3: RING finger	-0.208851	-0.502792
Trafficking	Trafficking: ER/Golgi: mannosidase	-0.20658	0.0643005
Transmembrane transport	Transmembrane transport: heme	-0.202558	1.55569
Trafficking	Trafficking: ER/Golgi: COP II	-0.197406	-0.353304
Proteolysis proteasome	Proteolysis proteasome: E3: HECT	-0.195739	-0.0274545
Neuronal function	Neuronal function: synaptic function: neuropeptide	-0.19499	1.38526
Protein modification	Protein modification: unassigned	-0.194481	0.144385
Ribosome	Ribosome: S6 kinase	-0.194117	-0.459209
Cytoskeleton	Cytoskeleton: unassigned	-0.194001	0.391299
Signaling	Signaling: small GTPase: Rap	-0.193118	0.375196
Stress response	Stress response: C-type Lectin	-0.192899	1.80121
Trafficking	Trafficking: vesicle targeting/fusion: unassigned	-0.192312	-0.547072
mRNA functions	mRNA functions: processing: cap	-0.191182	-0.408294
Transcription factor	Transcription factor: bHLH	-0.191096	0.445043
Signaling	Signaling: phosphatase: Y	-0.187285	-0.244554
Extracellular material	Extracellular material: secreted protein	-0.184429	0.111724
Lysosome	Lysosome: acid phosphatase	-0.176035	1.94834
Transcription: chromatin	Transcription: chromatin modification: deacetylase	-0.173244	-0.982823
Transmembrane transport	Transmembrane transport: ABC	-0.171468	0.652629
Signaling	Signaling: small GTPase: Raf	-0.168645	-1.06726
Trafficking	Trafficking: ER/Golgi: COP I	-0.165054	-0.129208
Signaling	Signaling: PKC	-0.163353	0.171969
Signaling	Signaling: small GTPase: ARF	-0.162055	-0.493253
Metabolism	Metabolism: lipid: binding	-0.161988	0.717894
Trafficking	Trafficking: vesicle targeting/fusion: GARP	-0.160967	-0.460596
Transmembrane transport	Transmembrane transport: nucleotide gated channel	-0.15667	0.264455
Signaling	Signaling: SH domain	-0.155483	0.206849
Proteolysis general	Proteolysis general: unassigned	-0.152123	0.236545
Stress response	Stress response: unassigned	-0.151828	0.657875
Proteolysis general	Proteolysis general: signal	-0.150914	0.0994961
Trafficking	Trafficking: endocytosis: clathrin	-0.144121	-0.283495
Proteolysis proteasome	Proteolysis proteasome: E3: unassigned	-0.140553	-0.425343
Trafficking	Trafficking: exocyst	-0.139935	-0.617393
Metabolism	Metabolism: glutathione	-0.138363	0.845048
Stress response	Stress response: pathogen: lectin	-0.137754	2.10943
Signaling	Signaling: small GTPase: Rho/Rac	-0.137186	0.187205
Signaling	Signaling: heteromeric G protein: G gamma subunit	-0.136135	0.0957341
Proteolysis general	Proteolysis general: serine	-0.136029	1.16742
Signaling	Signaling: lipid: phosphatase	-0.132188	-0.49184
Cytoskeleton	Cytoskeleton: motor protein: unassigned	-0.130794	0.942413
Lysosome	Lysosome: unassigned	-0.129831	0.216283
Trafficking	Trafficking: vesicle targeting/fusion: retromer	-0.129177	-1.02275
Metabolism	Metabolism: molybdenum cofactor	-0.128293	0.4443
Signaling	Signaling: lipid: kinase PI3	-0.128285	-0.370534
Proteolysis general	Proteolysis general: aspartate: cathepsin	-0.127404	2.8041
Signaling	Signaling: phosphatase: dual specificity	-0.122001	-0.451541
mRNA functions	mRNA functions: processing: poly U polymerase	-0.121971	-1.30377
Transcription factor	Transcription factor: AIRD	-0.120339	-2.03255
Signaling	Signaling: lipid: phospholipase: unassigned	-0.119753	-0.0430356
Unassigned	Unassigned: prion domain	-0.118128	0.273906
Cytoskeleton	Cytoskeleton: integrin	-0.116886	0.639768
Signaling	Signaling: casein kinase	-0.116161	0.0265766
Trafficking	Trafficking: unassigned	-0.113245	-0.214898
Transcription factor	Transcription factor: ZF	-0.110038	-0.152806
Neuronal function	Neuronal function: synaptic function: vesicle trafficking	-0.104876	0.442369
Proteolysis general	Proteolysis general: lysozyme	-0.103459	2.3436
Non-coding RNA	Non-coding RNA: processing	-0.103021	-0.803981
Signaling	Signaling: hippo	-0.0995649	0.416613
Proteolysis general	Proteolysis general: metallopeptidase	-0.0929007	0.812017
Signaling	Signaling: heteromeric G protein: G alpha subunit	-0.0914966	-0.200586
Metabolism	Metabolism: lipid: glycerolipid	-0.0900697	0.46791
Transcription factor	Transcription factor: homeodomain	-0.0891538	-0.0913732
Trafficking	Trafficking: vesicle targeting/fusion: RAB	-0.0833533	-0.195578
Signaling	Signaling: lipid: kinase PI4	-0.0831682	-0.0337448
Peroxisome	Peroxisome: biogenesis	-0.078711	0.500196
Metabolism	Metabolism: lipid: beta oxidation	-0.074735	1.25858
Transmembrane protein	Transmembrane protein: seven transmembrane receptor: str	-0.0746432	1.6103
DNA	DNA: nuclease	-0.0738752	-0.191092
Transmembrane transport	Transmembrane transport: anion	-0.0714101	0.478145
Signaling	Signaling: heteromeric G protein: adenylyl cyclase	-0.0711356	-0.0185901
Signaling	Signaling: calcium: EF hand	-0.0698251	0.787093
Signaling	Signaling: WNT	-0.0697634	-0.626472
Transmembrane transport	Transmembrane transport: major facilitator	-0.0655207	0.685848
Stress response	Stress response: pathogen: ShK	-0.0654971	2.32727
Stress response	Stress response: detoxification: ugt	-0.0653531	2.11073
Neuronal function	Neuronal function: development	-0.0638457	-0.732685
Signaling	Signaling: unassigned	-0.0633263	-0.09182
Metabolism	Metabolism: 1CC: folate	-0.0631348	-0.0430534
Pseudogene	Pseudogene	-0.057131	0.678408
Metabolism	Metabolism: B6	-0.053858	0.72932
Non-coding RNA	Non-coding RNA: small RNA: RNA polymerase	-0.0520334	-0.716704
Proteolysis proteasome	Proteolysis proteasome: E3: SCF	-0.0519094	-0.348367
Signaling	Signaling: cAMP	-0.0509045	1.33728
Unassigned	Unassigned: membrane spanning domain	-0.0475934	0.555084
Proteolysis general	Proteolysis general: carboxypeptidase	-0.0455965	1.79254
Extracellular material	Extracellular material: matrix	-0.0423251	0.761138
Protein modification	Protein modification: lipidation	-0.0403633	-0.421746
Extracellular material	Extracellular material: PGI	-0.0378513	0.0171884
Transcription: chromatin	Transcription: chromatin modification: NURF	-0.0365312	-0.981977
Signaling	Signaling: heteromeric G protein: unassigned	-0.034033	0.126929
Stress response	Stress response: pathogen: unassigned	-0.0333812	1.45557
Transcription factor	Transcription factor: ETS	-0.0299758	1.24494
Signaling	Signaling: S/T kinase	-0.0297098	-0.0930295
Protein modification	Protein modification: carbohydrate	-0.0267136	-0.0257783
Trafficking	Trafficking: ER/Golgi: ERGIC	-0.0237807	0.121443
Signaling	Signaling: rhomboid	-0.0229676	0.16146
Metabolism	Metabolism: lipid: sterol	-0.0208596	1.24232
Transmembrane transport	Transmembrane transport: amino acid	-0.0195401	0.768887
Transcription: chromatin	Transcription: chromatin structure: histone	-0.0178455	-0.576545
Signaling	Signaling: calcium: calmodulin dependent	-0.017714	0.517182
Signaling	Signaling: lipid: unassigned	-0.0175652	-0.521095
Metabolism	Metabolism: lipid: fatty acid	-0.0117047	0.975762
Transmembrane protein	Transmembrane protein: unassigned	-0.0113357	0.499451
Metabolism	Metabolism: carbohydrate	-0.0109718	0.355557
Signaling	Signaling: MAGUK	-0.0091506	0.118387
Metabolism	Metabolism: lipid: sphingolipid	-0.0031714	1.06015
Signaling	Signaling: AMPK	-0.00262648	0.92789
Metabolism	Metabolism: lipid: phospholipid	-0.00109816	0.783234
Signaling	Signaling: Y kinase	0.000827774	0.7883
Proteolysis general	Proteolysis general: cysteine: unassigned	0.00489419	2.56005
Stress response	Stress response: pathogen: lipid	0.00705568	1.7748
Signaling	Signaling: TGF beta	0.00806543	1.05138
Transmembrane transport	Transmembrane transport: solute carrier	0.00829357	0.857933
Signaling	Signaling: frizzled	0.0104501	0.842573
Transcription factor	Transcription factor: NHR	0.0115512	1.10316
Development	Development: germline	0.0188286	-0.984771
Signaling	Signaling: small GTPase: Ras	0.0199389	0.266149
Cytoskeleton	Cytoskeleton: microtubule: RMDN	0.0211878	0.0640168
Transmembrane transport	Transmembrane transport: ion	0.022629	-0.259522
Neuronal function	Neuronal function: unassigned	0.0254433	0.759504
Transmembrane protein	Transmembrane protein: seven transmembrane receptor: srg	0.0314757	0.698043
Development	Development: sex determination	0.0326202	-0.72756
Metabolism	Metabolism: FMO	0.037464	1.58137
Extracellular material	Extracellular material: galectin	0.0411245	1.25072
Transmembrane transport	Transmembrane transport: potassium channel	0.0434737	1.20764
Unassigned	Unassigned: hydrolase	0.0441991	0.792318
Stress response	Stress response: dauer	0.0447803	0.326098
Transmembrane transport	Transmembrane transport: extracellular ligand gated channel	0.0452215	1.58203
Proteolysis general	Proteolysis general: cysteine: calpain	0.0455315	-0.0466732
Cilia	Cilia: IFT-motor	0.0470212	0.137928
Transmembrane transport	Transmembrane transport: unassigned	0.0541218	0.489524
Signaling	Signaling: FERM	0.0550071	0.336624
Neuronal function	Neuronal function: synaptic function: neurotransmitter metabolism	0.0556227	1.2569
Lysosome	Lysosome: autophagy	0.0659696	-0.192442
Proteolysis general	Proteolysis general: cysteine: cathepsin	0.0677989	2.38849
Transmembrane transport	Transmembrane transport: chloride channel	0.0764068	0.695932
Transmembrane transport	Transmembrane transport: calcium channel	0.0813304	0.362253
Signaling	Signaling: lipid: phospholipase C	0.0827709	0.954104
Signaling	Signaling: dual specificity	0.0875188	0.427662
Signaling	Signaling: MAPK	0.088591	0.975839
Transmembrane transport	Transmembrane transport: sodium channel	0.0928684	1.03696
Metabolism	Metabolism: insulin	0.0952446	0.673163
Metabolism	Metabolism: lipid: transcriptional regulator	0.0962588	0.408434
Trafficking	Trafficking: endocytosis: unassigned	0.0967884	0.651842
Non-coding RNA	Non-coding RNA: linc	0.0975502	1.43738
Cytoskeleton	Cytoskeleton: innexin	0.110394	-0.0356848
Proteolysis general	Proteolysis general: inhibitor: peptidase inhibitor 16	0.111168	1.86896
Neuronal function	Neuronal function: synaptic function: unassigned	0.113725	0.557419
Proteolysis general	Proteolysis general: inhibitor: serine	0.115929	0.958368
Transmembrane transport	Transmembrane transport: ion channel	0.117296	1.87308
Signaling	Signaling: lipid: phospholipase D	0.120814	0.281057
Signaling	Signaling: lipid: phospholipase A	0.122767	0.136341
Signaling	Signaling: hedgehog-like	0.127107	0.902131
Transmembrane transport	Transmembrane transport: TRP channel	0.129664	1.3931
Transmembrane transport	Transmembrane transport: B12	0.135211	2.23884
Chaperone	Chaperone: HSP	0.140391	0.313267
Signaling	Signaling: heteromeric G protein: guanylyl cyclase	0.143161	0.757565
Signaling	Signaling: heteromeric G protein: arrestin	0.143313	0.630205
Transmembrane transport	Transmembrane transport: sugar	0.144295	0.869798
Transmembrane transport	Transmembrane transport: glutamate channel	0.146661	1.35524
Signaling	Signaling: AKT	0.166203	-0.42401
Cytoskeleton	Cytoskeleton: cadherin	0.170124	-0.492186
Transcription: dosage compensation	Transcription: dosage compensation	0.171693	-0.317158
Neuronal function	Neuronal function: synaptic function: neurotransmitter receptor	0.172104	1.54731
Transmembrane protein	Transmembrane protein: seven transmembrane receptor: unassigned	0.177346	1.16377
Stress response	Stress response: detoxification: CYP	0.179402	2.05008
Signaling	Signaling: heteromeric G protein: receptor	0.190238	1.1479
Cilia	Cilia: IFT-A	0.194383	0.844055
Stress response	Stress response: pathogen: NLP	0.205416	1.72421
Proteolysis general	Proteolysis general: inhibitor: TIL domain	0.226144	1.50054
Signaling	Signaling: heteromeric G protein: G beta subunit	0.233455	0.969932
Transmembrane transport	Transmembrane transport: lipid	0.252115	-0.0875673
Unassigned	Unassigned: TransThyretin-Related family domain	0.255403	1.84299
Extracellular material	Extracellular material: unassigned	0.260932	0.221656
Transcription factor	Transcription factor: T box	0.266616	0.874466
Stress response	Stress response: pathogen: signaling	0.281729	0.754481
Transmembrane protein	Transmembrane protein: seven transmembrane receptor: srr	0.28975	0.85067
Signaling	Signaling: lipid: kinase DAG	0.291053	-0.473361
Signaling	Signaling: FGF	0.293845	0.734269
Stress response	Stress response: pathogen: transcriptional regulator	0.294157	1.14193
Stress response	Stress response: pathogen: lysozyme	0.295841	2.14342
Stress response	Stress response: pathogen: CYP	0.301574	1.08843
Metabolism	Metabolism: lipid: lipase	0.323505	0.962041
Transmembrane transport	Transmembrane transport: metal ion	0.323951	0.578544
Stress response	Stress response: ER	0.343631	0.242758
Metabolism	Metabolism: lipid: epoxide hydrolase	0.359897	2.19265
Stress response	Stress response: heavy metal	0.392844	1.55229
Signaling	Signaling: PKD	0.436344	0.090313
Unassigned	Unassigned: Glycosyltransferase family A	0.436466	2.60688
Proteolysis general	Proteolysis general: inhibitor: cysteine	0.477802	1.53917
Transmembrane transport	Transmembrane transport: citrate	0.479793	2.09049
Stress response	Stress response: signaling	0.498521	1.57423
Metabolism	Metabolism: lipid: o-acyl transferase	0.501411	2.0857
Transmembrane transport	Transmembrane transport: ammonium	0.541177	1.28951
Extracellular material	Extracellular material: chitinase	0.550671	1.81299
Stress response	Stress response: detoxification: unassigned	0.554682	3.14463
Transmembrane transport	Transmembrane transport: sulfate	0.699629	1.43453
Non-coding RNA	Non-coding RNA: ncRNA	0.724569	0.81082
Signaling	Signaling: caveolin	0.732986	-0.70219
Proteolysis general	Proteolysis general: inhibitor: unassigned	0.765444	1.12527
Signaling	Signaling: VEGF	1.00871	1.97532
Stress response	Stress response: pathogen: caenacin	1.35213	2.11936
Stress response	Stress response: pathogen: ASABF	1.42369	1.68704
Major sperm protein	Major sperm protein	1.69007	6.12856
