# Supplementary material for: Neuronal temperature perception induces specific defenses that enable C. elegans to cope with the enhanced reactivity of hydrogen peroxide at high temperature
Source: eLife. 2022 Oct 13;11:e78941. doi: 10.7554/eLife.78941 (PMC9635881; doi:10.7554/eLife.78941)
Supplement: Figure 4—source data 1. [file elife-78941-fig4-data1.xlsx]

## Sheet: Figure 4
Figure 4
GeneName	GeneSymbol	wildtype_25C_vs_wildtype_20C_baseMean	wildtype_25C_vs_wildtype_20C_log2FoldChange	wildtype_25C_vs_wildtype_20C_lfcSE	wildtype_25C_vs_wildtype_20C_stat	wildtype_25C_vs_wildtype_20C_pvalue	wildtype_25C_vs_wildtype_20C_padj	AFD(-)_20C_vs_wildtype_20C_log2FoldChange	wildtype_20C_vs_AFD(-)_20C_log2FoldChange	wildtype_20C_vs_AFD(-)_20C_lfcSE	wildtype_20C_vs_AFD(-)_20C_stat	wildtype_20C_vs_AFD(-)_20C_pvalue	wildtype_20C_vs_AFD(-)_20C_padj
WBGene00000001	aap-1	465.351	-0.16408	0.1899	-0.864033	0.38757	0.597037	-2.02821	2.02821	0.434882	4.66383	3.10385e-06	1.1265e-05
WBGene00000002	aat-1	59.4019	1.40527	0.360724	3.89568	9.79236e-05	0.0007701
WBGene00000003	aat-2	43.2419	0.468618	0.31605	1.48273	0.138145	0.302264
WBGene00000004	aat-3	84.9756	0.313625	0.240557	1.30375	0.192319	0.379343	0.471663	-0.471663	0.612772	-0.769721	0.441466	0.49749
WBGene00000005	aat-4	82.5307	-0.306077	0.254771	-1.20138	0.229604	0.428053	1.40108	-1.40108	0.562186	-2.49219	0.0126957	0.0213765
WBGene00000006	aat-5	68.3996	-0.281212	0.327807	-0.85786	0.39097	0.600043	1.77586	-1.77586	0.655736	-2.70819	0.0067651	0.0121511
WBGene00000007	aat-6	63.7933	0.505271	0.277229	1.82258	0.0683676	0.181946
WBGene00000008	aat-7	14.7117	0.747012	0.494896	1.50943	0.131188	0.291086
WBGene00000009	aat-8	41.2947	0.285736	0.320284	0.892133	0.372322	0.582748
WBGene00000010	aat-9	156.552	-0.0220347	0.218111	-0.101025	0.919531	0.96167	-0.379989	0.379989	0.460224	0.825661	0.408996	0.465609
WBGene00000013	abf-2	110.056	2.82198	0.699842	4.03231	5.52322e-05	0.000465866	4.4361	-4.4361	0.739421	-5.99942	1.98028e-09	1.20245e-08
WBGene00000015	abf-4	19.0806	0.263713	0.520488	0.506665	0.61239	0.776939
WBGene00000016	abf-5	404.037	0.745851	0.219041	3.40507	0.000661469	0.00400824	0.260685	-0.260685	0.433442	-0.601431	0.547553	0.598624
WBGene00000017	abf-6	284.246	0.703239	0.254252	2.76592	0.00567631	0.0251115	0.364345	-0.364345	0.471647	-0.772494	0.439822	0.495991
WBGene00000018	abl-1	156.33	0.13705	0.235373	0.582269	0.560385	0.737517	0.164259	-0.164259	0.494327	-0.332289	0.739671	0.775445
WBGene00000019	abt-1	43.1055	0.391629	0.31573	1.24039	0.214831	0.40929
WBGene00000020	abt-2	237.234	0.155078	0.206062	0.752578	0.451704	0.652611	1.33016	-1.33016	0.448063	-2.96869	0.00299076	0.00585281
WBGene00000021	abt-3	81.0975	0.49296	0.292354	1.68618	0.0917616	0.225964
WBGene00000022	abt-4	631.669	0.145139	0.173398	0.837028	0.402577	0.609841	0.866535	-0.866535	0.219108	-3.95483	7.65878e-05	0.000211801
WBGene00000023	abt-5	35.6836	0.924373	0.34588	2.67252	0.00752832	0.0315613
WBGene00000025	abu-2	18.8177	-0.375082	0.628152	-0.59712	0.550427	0.73062
WBGene00000031	abu-8	15.598	-0.495813	0.566536	-0.875166	0.381483	0.59158
WBGene00000033	abu-10	23.7184	0.0663673	0.619711	0.107094	0.914714	0.959055
WBGene00000035	ace-1	53.9378	0.111749	0.301685	0.370416	0.711073	0.841815
WBGene00000036	ace-2	38.1384	-0.529882	0.317	-1.67155	0.0946127	0.230824
WBGene00000037	ace-3	28.4031	0.199725	0.432065	0.462257	0.643897	0.800869
WBGene00000038	ace-4	34.5961	0.416302	0.322031	1.29274	0.196102	0.384349
WBGene00000039	acn-1	27.4399	-1.47461	0.552443	-2.66925	0.00760206	0.0317841
WBGene00000040	aco-1	657.032	0.0984003	0.12517	0.786133	0.43179	0.635854	1.40453	-1.40453	0.212973	-6.59489	4.25564e-11	3.21285e-10
WBGene00000041	aco-2	1139.78	-0.585727	0.131248	-4.46276	8.09114e-06	8.46454e-05	0.486649	-0.486649	0.167939	-2.89777	0.00375821	0.00717369
WBGene00000042	acr-2	10.2976	0.0151431	0.581955	0.026021	0.979241	0.989481
WBGene00000043	acr-3	47.0781	0.0180706	0.309689	0.0583508	0.953469	0.97783
WBGene00000044	acr-5	60.6318	0.239478	0.313623	0.763587	0.445114	0.646887
WBGene00000045	acr-6	15.8726	1.13608	0.556611	2.04108	0.0412433	0.123898
WBGene00000046	acr-7	13.704	-0.130298	0.506389	-0.257307	0.796942	0.894157
WBGene00000047	acr-8	16.8186	0.544003	0.522232	1.04169	0.297556	0.505221
WBGene00000048	acr-9	18.5857	1.08677	0.468502	2.31968	0.0203583	0.0708036
WBGene00000049	acr-10	18.9171	0.175196	0.513209	0.341374	0.732822	0.855347
WBGene00000050	acr-11	18.4769	0.0956434	0.414635	0.230669	0.817572	0.905722
WBGene00000051	acr-12	56.6562	-0.0796199	0.338441	-0.235255	0.814011	0.90361
WBGene00000053	acr-14	22.3015	0.48235	0.537318	0.897699	0.369346	0.580445
WBGene00000054	acr-15	47.2454	0.166345	0.301172	0.552327	0.580724	0.753627
WBGene00000055	acr-16	26.7015	0.453836	0.439263	1.03318	0.301521	0.51006
WBGene00000056	acr-17	48.626	0.78602	0.3038	2.5873	0.00967315	0.0389565
WBGene00000057	acr-18	39.6942	-0.0715741	0.401377	-0.178322	0.85847	0.929317
WBGene00000058	acr-19	42.0154	0.272968	0.289712	0.942205	0.346088	0.55651
WBGene00000059	acr-20	51.7957	0.515953	0.332018	1.55399	0.120187	0.273509
WBGene00000060	acr-21	26.1401	0.538347	0.475198	1.13289	0.257261	0.461444
WBGene00000061	lgc-11	13.5259	-0.720557	0.607362	-1.18637	0.235476	0.435338
WBGene00000062	acr-23	6.97334	0.937937	0.742156	1.2638	0.206302	1
WBGene00000063	act-1	1775.97	-1.72939	0.104768	-16.5068	3.27892e-61	3.97663e-58	0.574833	-0.574833	0.202452	-2.83936	0.00452041	0.0084873
WBGene00000064	act-2	3001.95	-0.731889	0.109718	-6.67063	2.54701e-11	7.40509e-10	-1.03284	1.03284	0.182889	5.64738	1.62911e-08	8.51357e-08
WBGene00000065	act-3	2337.88	-1.02556	0.0954948	-10.7395	6.64304e-27	7.67294e-25	0.888546	-0.888546	0.21407	-4.15073	3.31423e-05	9.84316e-05
WBGene00000066	act-4	15035	-1.12788	0.167114	-6.7492	1.4866e-11	4.4833e-10	1.07157	-1.07157	0.121648	-8.80879	1.26509e-18	2.02928e-17
WBGene00000067	act-5	2573.4	-1.04995	0.0965573	-10.8739	1.53531e-27	1.93097e-25	1.38215	-1.38215	0.163274	-8.46522	2.55672e-17	3.6514e-16
WBGene00000068	acy-1	164.769	0.304914	0.206579	1.47602	0.139939	0.305171	0.323274	-0.323274	0.575682	-0.561549	0.574423	0.623777
WBGene00000069	acy-2	20.1168	0.465156	0.434239	1.0712	0.28408	0.490838
WBGene00000070	acy-3	117.061	0.242747	0.211995	1.14506	0.252184	0.454962	0.779068	-0.779068	0.522064	-1.49228	0.135624	0.176868
WBGene00000071	acy-4	125.7	0.0436599	0.22424	0.194702	0.845626	0.921247	0.292417	-0.292417	0.586453	-0.498619	0.618048	0.665034
WBGene00000072	add-1	70.4275	0.177288	0.263328	0.673259	0.500782	0.693499
WBGene00000073	add-2	152.632	0.182971	0.21555	0.848854	0.395963	0.603993	1.91419	-1.91419	0.554195	-3.454	0.000552339	0.00127629
WBGene00000074	adm-2	170.781	0.192898	0.184344	1.0464	0.295375	0.503329	-0.0798087	0.0798087	0.474514	0.16819	0.866434	0.887407
WBGene00000075	adm-4	109.134	-0.0253015	0.198366	-0.127549	0.898506	0.949104	0.0583707	-0.0583707	0.673231	-0.0867024	0.930908	0.941739
WBGene00000079	adr-1	102.626	0.206705	0.2532	0.816373	0.414287	0.619805
WBGene00000080	adr-2	463.898	-0.827964	0.175506	-4.71757	2.38679e-06	2.79292e-05	-2.96722	2.96722	0.4189	7.08336	1.40698e-12	1.27955e-11
WBGene00000081	ads-1	1028.37	-0.61845	0.129994	-4.75755	1.95961e-06	2.34477e-05	1.82326	-1.82326	0.217757	-8.37291	5.62107e-17	7.73459e-16
WBGene00000082	adt-1	98.9368	0.317887	0.289174	1.09929	0.271641	0.478325
WBGene00000083	adt-2	204.321	-0.391895	0.156488	-2.50432	0.0122687	0.047259	0.908414	-0.908414	0.323377	-2.80915	0.00496733	0.00923437
WBGene00000084	aex-1	52.2733	0.163329	0.289607	0.56397	0.572775	0.747136
WBGene00000085	aex-2	90.5251	0.314666	0.264575	1.18933	0.23431	0.43394
WBGene00000086	aex-3	89.9939	0.193221	0.33487	0.577003	0.563938	0.740533
WBGene00000088	aex-5	263.537	0.0134034	0.181213	0.0739648	0.941038	0.972357	3.58462	-3.58462	0.256299	-13.9861	1.89574e-44	1.30427e-42
WBGene00000089	aex-6	61.4894	0.164727	0.338316	0.486904	0.626327	0.788726
WBGene00000090	age-1	506.195	-0.691323	0.163656	-4.22425	2.3974e-05	0.000221751	-1.8342	1.8342	0.430711	4.25853	2.05771e-05	6.37066e-05
WBGene00000092	ags-3	137.191	0.0852668	0.197531	0.431663	0.665986	0.814686	1.76626	-1.76626	0.387642	-4.55641	5.20342e-06	1.79858e-05
WBGene00000093	agt-1	201.443	-1.07582	0.156699	-6.86549	6.62618e-12	2.08731e-10	-0.921333	0.921333	0.469098	1.96405	0.0495239	0.0721147
WBGene00000094	agt-2	428.839	-0.415425	0.204741	-2.02903	0.0424557	0.126889	-2.97185	2.97185	0.387722	7.66489	1.78981e-14	1.9372e-13
WBGene00000095	aha-1	63.9454	0.46104	0.300803	1.5327	0.12535	0.281673
WBGene00000096	ahr-1	13.8077	0.994032	0.560016	1.77501	0.0758968	0.196369
WBGene00000097	aip-1	240.134	-0.0515679	0.158246	-0.325873	0.744521	0.862117	-0.671678	0.671678	0.4199	1.59961	0.109684	0.146591
WBGene00000098	air-1	1069.33	-0.107851	0.124106	-0.869023	0.384835	0.594334	-2.05171	2.05171	0.315822	6.49642	8.22541e-11	5.9542e-10
WBGene00000099	air-2	492.634	-0.495945	0.129278	-3.83628	0.000124913	0.000948525	-1.77341	1.77341	0.366591	4.83756	1.3144e-06	5.1028e-06
WBGene00000100	ajm-1	635.912	-0.0428497	0.137176	-0.312371	0.754759	0.868849	1.56101	-1.56101	0.247016	-6.31946	2.62483e-10	1.79962e-09
WBGene00000101	aka-1	1501.84	-0.14399	0.175411	-0.820872	0.411719	0.617488	-2.01058	2.01058	0.218214	9.2138	3.14784e-20	5.83271e-19
WBGene00000102	akt-1	886.46	-0.430587	0.131412	-3.27661	0.00105062	0.00595135	-1.84114	1.84114	0.28896	6.3716	1.87062e-10	1.304e-09
WBGene00000103	akt-2	91.7184	1.0073	0.213146	4.72585	2.2916e-06	2.69454e-05	1.34249	-1.34249	0.603051	-2.22616	0.0260035	0.0405558
WBGene00000105	alg-1	203.392	0.050811	0.217395	0.233726	0.815197	0.904259	1.30118	-1.30118	0.360953	-3.60486	0.000312317	0.000760793
WBGene00000106	alg-2	289.768	-0.116286	0.202501	-0.574252	0.565797	0.742209	-0.763203	0.763203	0.373041	2.04589	0.0407668	0.060504
WBGene00000107	alh-1	1503.71	-0.48901	0.0967406	-5.05486	4.3071e-07	5.92148e-06	0.19523	-0.19523	0.15975	-1.2221	0.22167	0.27244
WBGene00000108	alh-2	6.75341	-0.351476	0.765329	-0.459248	0.646056	1
WBGene00000109	alh-3	384.679	-0.098097	0.177438	-0.552853	0.580364	0.753582	0.284896	-0.284896	0.325853	-0.874308	0.381951	0.438797
WBGene00000110	alh-4	717.165	-0.215521	0.14586	-1.47759	0.139518	0.304443	1.36476	-1.36476	0.172293	-7.92119	2.3525e-15	2.78221e-14
WBGene00000111	alh-5	20.955	-0.0017694	0.547678	-0.00323074	0.997422	0.998554
WBGene00000112	alh-6	295.27	-0.230944	0.170183	-1.35704	0.17477	0.355464	0.960056	-0.960056	0.297393	-3.22824	0.00124557	0.00264704
WBGene00000113	alh-7	123.211	-0.326843	0.227701	-1.4354	0.151172	0.321249	0.372532	-0.372532	0.608945	-0.611767	0.540692	0.59235
WBGene00000114	alh-8	5334.07	0.245822	0.102946	2.38787	0.0169464	0.0612588	1.91584	-1.91584	0.123505	-15.5123	2.86637e-54	3.3351e-52
WBGene00000115	alh-9	933.164	-0.239403	0.127481	-1.87796	0.0603869	0.165995	1.59691	-1.59691	0.159549	-10.0089	1.39257e-23	3.30871e-22
WBGene00000116	alh-10	178.149	0.0257054	0.184876	0.139041	0.889417	0.944225	0.127516	-0.127516	0.446092	-0.285851	0.774992	0.807551
WBGene00000117	alh-11	343.433	-0.257446	0.159361	-1.61549	0.106204	0.250904	-0.114899	0.114899	0.34244	0.335529	0.737226	0.773599
WBGene00000118	alh-12	383.82	-0.485159	0.162366	-2.98805	0.00280761	0.0138376	1.41237	-1.41237	0.243706	-5.79539	6.81616e-09	3.80858e-08
WBGene00000120	aly-1	239.506	0.00493659	0.190494	0.0259146	0.979325	0.989481	0.290496	-0.290496	0.371729	-0.781473	0.434524	0.490716
WBGene00000121	aly-2	1172.68	-0.615203	0.110145	-5.58538	2.33194e-08	4.02378e-07	-2.26953	2.26953	0.240431	9.43944	3.74774e-21	7.54506e-20
WBGene00000122	aly-3	659.863	-0.539106	0.157818	-3.416	0.000635478	0.00387982	-1.52154	1.52154	0.267754	5.68259	1.3267e-08	7.0213e-08
WBGene00000123	ama-1	1585.33	-0.213904	0.173741	-1.23116	0.218261	0.413508	-0.196526	0.196526	0.233492	0.841682	0.399966	0.456187
WBGene00000133	amt-1	156.85	1.82792	0.231519	7.89536	2.89487e-15	1.42469e-13	0.442011	-0.442011	0.469019	-0.942416	0.34598	0.402499
WBGene00000134	amt-2	16.0541	-0.668691	0.460387	-1.45245	0.146376	0.314853
WBGene00000135	amt-3	18.5495	0.0291156	0.452962	0.0642782	0.948749	0.975126
WBGene00000136	amt-4	106.581	0.34775	0.246252	1.41217	0.1579	0.331667	2.619	-2.619	0.671861	-3.89813	9.69398e-05	0.000262757
WBGene00000137	amx-1	88.9635	0.35175	0.269323	1.30605	0.191535	0.378632	0.822167	-0.822167	0.710226	-1.15761	0.247022	0.300221
WBGene00000138	amx-2	108.922	-0.0391331	0.247399	-0.158178	0.874316	0.937047	1.475	-1.475	0.614626	-2.39984	0.0164023	0.0268852
WBGene00000139	amx-3	48.5748	-0.0921868	0.321363	-0.286862	0.774218	0.879588
WBGene00000140	anc-1	1739.88	-0.138457	0.10108	-1.36978	0.170755	0.349974	1.94182	-1.94182	0.157521	-12.3274	6.44949e-35	2.98412e-33
WBGene00000142	aos-1	465.714	-0.594904	0.139939	-4.25117	2.12654e-05	0.000199594	-1.77457	1.77457	0.339188	5.23181	1.67857e-07	7.56313e-07
WBGene00000143	apc-2	324.762	-1.03043	0.147873	-6.96835	3.20677e-12	1.04909e-10	-0.860114	0.860114	0.420241	2.04671	0.0406861	0.0603955
WBGene00000144	apc-10	524.461	-0.0411147	0.194977	-0.21087	0.832989	0.913828	-2.30052	2.30052	0.407031	5.65194	1.58648e-08	8.31276e-08
WBGene00000145	apc-11	172.375	-0.675337	0.191729	-3.52235	0.000427735	0.00276345	-2.20133	2.20133	0.640208	3.43846	0.000585023	0.00134321
WBGene00000146	ape-1	710.527	-0.529449	0.13994	-3.78341	0.000154695	0.00113802	-1.91337	1.91337	0.307709	6.21812	5.03157e-10	3.31472e-09
WBGene00000147	aph-1	338.687	-0.25564	0.13447	-1.9011	0.0572893	0.159527	-1.55864	1.55864	0.420786	3.70411	0.000212133	0.000534521
WBGene00000148	aph-2	162.371	-0.333965	0.195038	-1.71231	0.0868397	0.217023	-0.0632687	0.0632687	0.431745	0.146542	0.883494	0.900915
WBGene00000149	apl-1	911.134	0.176474	0.153928	1.14647	0.251603	0.454319	1.70701	-1.70701	0.209599	-8.14414	3.81977e-16	4.93019e-15
WBGene00000150	apm-1	116.03	-0.195629	0.201942	-0.96874	0.332675	0.542394	1.26334	-1.26334	0.481378	-2.62443	0.0086795	0.015169
WBGene00000151	apn-1	627.134	-0.872587	0.163402	-5.34012	9.28856e-08	1.44556e-06	-2.17102	2.17102	0.418017	5.19362	2.06248e-07	9.14192e-07
WBGene00000155	app-1	1032.32	-0.383465	0.130223	-2.94467	0.00323298	0.0156167	-0.739436	0.739436	0.198352	3.7279	0.000193082	0.000491211
WBGene00000156	44652	538.649	-0.260421	0.189791	-1.37215	0.170018	0.349025	-1.65805	1.65805	0.365677	4.5342	5.78219e-06	1.97789e-05
WBGene00000157	aps-2	129.662	-0.605147	0.211678	-2.85881	0.00425238	0.0196252	1.52005	-1.52005	0.531818	-2.85822	0.00426027	0.00804662
WBGene00000158	apg-1	563.678	-0.460749	0.148542	-3.1018	0.00192346	0.0100271	-0.39307	0.39307	0.309993	1.268	0.204799	0.254215
WBGene00000159	aps-1	400.517	-0.649395	0.145678	-4.45775	8.28231e-06	8.64855e-05	-0.53765	0.53765	0.504888	1.06489	0.286926	0.342355
WBGene00000160	apb-1	489.798	-0.237027	0.168296	-1.40839	0.159015	0.333036	-0.147959	0.147959	0.306774	0.482307	0.629588	0.676256
WBGene00000161	apa-2	278.219	0.198222	0.171327	1.15698	0.247281	0.449238	0.427289	-0.427289	0.33506	-1.27526	0.202217	0.25143
WBGene00000162	apd-3	694.541	-0.715632	0.137292	-5.21247	1.86345e-07	2.7441e-06	-0.943368	0.943368	0.303677	3.10648	0.00189327	0.00386171
WBGene00000163	apb-3	1277.94	-0.559393	0.112435	-4.97528	6.51543e-07	8.62241e-06	-1.54187	1.54187	0.24921	6.18704	6.13047e-10	3.98556e-09
WBGene00000164	apm-3	91.9935	0.33025	0.234432	1.40873	0.158916	0.332884	1.38817	-1.38817	0.585825	-2.3696	0.0178071	0.0289227
WBGene00000165	aps-3	311.404	-1.42175	0.141641	-10.0377	1.04069e-23	9.65568e-22	-1.5035	1.5035	0.451548	3.32964	0.000869568	0.00192072
WBGene00000166	apt-9	16.0732	0.86745	0.594539	1.45903	0.144557	0.312189
WBGene00000168	apx-1	529.246	0.231345	0.159804	1.44768	0.147707	0.316619	-1.82634	1.82634	0.421246	4.33557	1.4538e-05	4.63063e-05
WBGene00000169	aqp-1	141.527	-0.737535	0.321292	-2.29553	0.0217027	0.0744941	2.06257	-2.06257	0.46319	-4.45296	8.46961e-06	2.81561e-05
WBGene00000170	aqp-2	294.375	0.820804	0.164809	4.98033	6.34775e-07	8.4202e-06	0.728491	-0.728491	0.407256	-1.78878	0.0736506	0.102646
WBGene00000171	aqp-3	16.6054	0.894978	0.513259	1.74371	0.0812089	0.206723
WBGene00000172	aqp-4	278.841	-0.543032	0.161031	-3.37223	0.000745634	0.00444215	2.31639	-2.31639	0.282663	-8.19489	2.50814e-16	3.30645e-15
WBGene00000173	aqp-5	17.5837	0.799389	0.480911	1.66224	0.0964648	0.234129
WBGene00000174	aqp-6	13.5455	0.250215	0.505606	0.494881	0.620684	0.784355
WBGene00000175	aqp-7	642.922	-0.722039	0.119977	-6.01813	1.76445e-09	3.7262e-08	1.49863	-1.49863	0.194482	-7.70577	1.30059e-14	1.42921e-13
WBGene00000176	aqp-8	173.776	-0.587507	0.171319	-3.42932	0.000605087	0.00372238	0.232394	-0.232394	0.452409	-0.513683	0.607474	0.655171
WBGene00000177	aqp-9	57.1462	-0.578705	0.281519	-2.05565	0.039816	0.120874	1.79298	-1.79298	0.581829	-3.08162	0.00205878	0.004166
WBGene00000178	aqp-10	274.976	0.216612	0.177066	1.22335	0.221199	0.41749	1.72085	-1.72085	0.39203	-4.38958	1.1357e-05	3.69172e-05
WBGene00000179	aqp-11	296.445	-0.595742	0.182074	-3.27198	0.00106798	0.00603635	1.9339	-1.9339	0.274316	-7.04988	1.79075e-12	1.59915e-11
WBGene00000180	arc-1	110.702	-0.278997	0.230141	-1.21229	0.225403	0.422951	0.64699	-0.64699	0.452767	-1.42897	0.153013	0.196761
WBGene00000181	ard-1	578.136	-0.433907	0.136281	-3.1839	0.00145303	0.00787708	0.147835	-0.147835	0.212832	-0.694611	0.487299	0.540669
WBGene00000182	arf-1.2	1099.92	-0.292137	0.101666	-2.87351	0.00405941	0.0188628	0.877581	-0.877581	0.183206	-4.79014	1.66667e-06	6.35505e-06
WBGene00000183	arf-3	1621.98	-0.517882	0.100389	-5.15874	2.4862e-07	3.56531e-06	-0.158825	0.158825	0.15297	1.03827	0.299144	0.354474
WBGene00000184	arf-6	134.295	-0.366211	0.245213	-1.49344	0.135321	0.297735	-0.760846	0.760846	0.659932	1.15292	0.248945	0.302094
WBGene00000185	arg-1	40.6564	-0.0252593	0.511259	-0.0494061	0.960596	0.98113
WBGene00000186	ark-1	510.288	-0.0249582	0.129657	-0.192494	0.847355	0.922259	-1.53448	1.53448	0.356558	4.30358	1.68057e-05	5.29749e-05
WBGene00000187	arl-1	306.99	0.0699162	0.17409	0.401609	0.687972	0.82821	-0.327758	0.327758	0.421505	0.777589	0.436812	0.493128
WBGene00000188	arl-3	24.7445	0.6775	0.3649	1.85667	0.063358	0.171994
WBGene00000189	arl-5	182.047	-0.0831441	0.159905	-0.51996	0.603091	0.770902	-2.42568	2.42568	0.57677	4.20562	2.60365e-05	7.90184e-05
WBGene00000190	arf-1.1	53.4237	-1.0808	0.293897	-3.67749	0.000235539	0.00164916
WBGene00000191	arl-7	58.6058	-0.39426	0.286597	-1.37566	0.168927	0.347452
WBGene00000192	arl-8	763.37	-0.320801	0.120275	-2.66724	0.0076478	0.0319282	-0.784022	0.784022	0.26658	2.94104	0.00327115	0.00632486
WBGene00000193	arl-6	25.5635	-0.054585	0.357369	-0.152741	0.878602	0.938993
WBGene00000195	arr-1	77.1006	0.623104	0.286434	2.17538	0.0296015	0.0956795
WBGene00000196	aars-1	231.787	-0.499918	0.185664	-2.6926	0.00708972	0.0300571	-0.188039	0.188039	0.468511	0.401355	0.688159	0.729659
WBGene00000197	aars-2	1286.12	0.0173301	0.153011	0.11326	0.909824	0.956467	0.06484	-0.06484	0.177045	-0.366234	0.71419	0.752624
WBGene00000198	art-1	1033.56	-0.0633454	0.101956	-0.6213	0.534403	0.719325	-0.252456	0.252456	0.231914	1.08858	0.276341	0.330723
WBGene00000199	arx-1	279.794	0.0107652	0.198699	0.0541786	0.956793	0.979427	0.0435704	-0.0435704	0.335864	-0.129726	0.896783	0.912467
WBGene00000200	arx-2	664.574	-0.199117	0.167782	-1.18676	0.235321	0.435238	-1.07399	1.07399	0.276624	3.88247	0.0001034	0.000279024
WBGene00000201	arx-3	695.623	-0.0461621	0.106574	-0.433144	0.66491	0.814421	-0.333187	0.333187	0.275846	1.20787	0.227096	0.278571
WBGene00000202	exos-4.2	136.753	-0.754584	0.191761	-3.93503	8.31858e-05	0.000670661
WBGene00000203	arx-5	230.074	-0.312147	0.161036	-1.93836	0.0525789	0.149713	-0.407477	0.407477	0.364126	1.11906	0.263116	0.317181
WBGene00000204	arx-6	331.878	-0.0488232	0.138498	-0.352518	0.72445	0.850472	-0.737643	0.737643	0.347649	2.1218	0.0338543	0.0513624
WBGene00000205	arx-7	247.458	-0.426885	0.145315	-2.93765	0.00330705	0.0159114	-1.67374	1.67374	0.41796	4.00454	6.21375e-05	0.000175207
WBGene00000206	asb-1	1092.26	-0.84608	0.10389	-8.14402	3.82365e-16	2.06757e-14	-0.897593	0.897593	0.211017	4.25365	2.10313e-05	6.49745e-05
WBGene00000207	asb-2	1143.57	-0.755424	0.120408	-6.27386	3.52199e-10	8.53065e-09	1.74906	-1.74906	0.184141	-9.49848	2.12981e-21	4.36557e-20
WBGene00000208	trip-4	587.216	-0.842038	0.12169	-6.91954	4.53118e-12	1.4571e-10	-0.137514	0.137514	0.262285	0.524292	0.600075	0.648163
WBGene00000209	asg-1	1039.26	-0.516772	0.115388	-4.47857	7.51442e-06	7.92867e-05	-0.608092	0.608092	0.194701	3.12322	0.00178885	0.00366574
WBGene00000210	asg-2	428.145	-1.25586	0.178466	-7.03694	1.96513e-12	6.62023e-11	2.17301	-2.17301	0.268279	-8.09981	5.50457e-16	6.97952e-15
WBGene00000211	asm-1	121.444	0.400334	0.204177	1.96072	0.0499119	0.143515	0.671843	-0.671843	0.695616	-0.965824	0.334132	0.389977
WBGene00000212	asm-2	250.361	-0.414044	0.202183	-2.04787	0.0405731	0.122622	1.67753	-1.67753	0.326106	-5.14412	2.68779e-07	1.1762e-06
WBGene00000213	asm-3	68.1932	-0.276798	0.321856	-0.860003	0.389787	0.598971	3.90349	-3.90349	0.387269	-10.0795	6.80482e-24	1.64648e-22
WBGene00000214	asp-1	16882.3	-0.316898	0.113002	-2.80436	0.00504162	0.0227482	1.93307	-1.93307	0.134953	-14.324	1.54945e-46	1.17878e-44
WBGene00000215	asp-2	5624.49	-0.0636499	0.148151	-0.429628	0.667466	0.815251	1.83607	-1.83607	0.18317	-10.0238	1.19755e-23	2.86255e-22
WBGene00000216	asp-3	9527.18	-0.479111	0.0989993	-4.83954	1.30143e-06	1.60705e-05	2.67561	-2.67561	0.172951	-15.4704	5.50014e-54	5.96124e-52
WBGene00000217	asp-4	8815.4	-0.186441	0.120896	-1.54216	0.123035	0.278126	2.41726	-2.41726	0.138387	-17.4674	2.53682e-68	4.46029e-66
WBGene00000218	asp-5	7632.51	0.615932	0.109327	5.63383	1.76247e-08	3.10748e-07	1.91285	-1.91285	0.134261	-14.2473	4.66156e-46	3.41502e-44
WBGene00000219	asp-6	13724.7	-0.174594	0.112046	-1.55824	0.119176	0.272012	1.84318	-1.84318	0.122838	-15.005	6.81169e-51	6.34048e-49
WBGene00000220	atf-2	27.3511	0.00332738	0.426363	0.00780409	0.993773	0.996826
WBGene00000221	atf-5	687.04	-0.259622	0.151428	-1.71449	0.0864387	0.216295	1.41783	-1.41783	0.212301	-6.67842	2.41532e-11	1.89396e-10
WBGene00000222	atf-6	73.7274	0.405784	0.25506	1.59094	0.111624	0.259553
WBGene00000223	atf-7	852.141	-0.501946	0.162634	-3.08636	0.00202626	0.010489	0.268989	-0.268989	0.20641	-1.30318	0.192514	0.241069
WBGene00000224	atgp-1	300.786	-0.051271	0.138719	-0.369603	0.711678	0.842296	1.08701	-1.08701	0.36599	-2.97004	0.00297759	0.00582847
WBGene00000225	atgp-2	83.7541	0.139962	0.249466	0.561048	0.574765	0.748786	1.60597	-1.60597	0.567655	-2.82913	0.00466746	0.00873493
WBGene00000226	atl-1	598.278	-0.693357	0.156948	-4.41774	9.97377e-06	0.000101586	-0.908311	0.908311	0.284941	3.18771	0.00143403	0.00300002
WBGene00000227	atm-1	319.916	-0.266505	0.201042	-1.32562	0.184965	0.369081	-0.487532	0.487532	0.410411	1.18791	0.234868	0.287259
WBGene00000228	atn-1	500.729	-0.361192	0.169355	-2.13275	0.0329451	0.104167	1.53681	-1.53681	0.217911	-7.05246	1.75783e-12	1.57508e-11
WBGene00000229	atp-2	6762.77	-0.732627	0.128777	-5.68912	1.27697e-08	2.32137e-07	0.74679	-0.74679	0.1141	-6.54504	5.94797e-11	4.38996e-10
WBGene00000230	atp-3	2736.47	-0.607776	0.100342	-6.05703	1.38655e-09	3.01052e-08	0.489877	-0.489877	0.13333	-3.67416	0.00023863	0.000595408
WBGene00000231	atx-2	939.474	-0.313156	0.165318	-1.89426	0.0581905	0.161256	-0.130956	0.130956	0.195189	0.670921	0.502271	0.555023
WBGene00000232	avr-14	87.4815	0.0289935	0.277296	0.104558	0.916727	0.96006
WBGene00000233	avr-15	129.903	-0.13059	0.231413	-0.564315	0.57254	0.747034	1.18617	-1.18617	0.46683	-2.54091	0.0110563	0.0188896
WBGene00000235	baf-1	1454.76	-1.12134	0.117668	-9.52971	1.57725e-21	1.23982e-19	0.136711	-0.136711	0.212833	-0.642338	0.520653	0.57268
WBGene00000236	bag-1	240.27	-0.556543	0.168138	-3.31003	0.000932855	0.00538373	-0.782248	0.782248	0.401683	1.94743	0.0514838	0.0746454
WBGene00000237	bam-2	121.397	0.534349	0.198207	2.69592	0.00701948	0.0298258	1.72707	-1.72707	0.527519	-3.27395	0.00106057	0.00229582
WBGene00000238	bar-1	97.2094	0.328627	0.213428	1.53976	0.12362	0.278929	1.26746	-1.26746	0.608034	-2.08451	0.0371134	0.0557194
WBGene00000239	bas-1	86.2529	0.142726	0.216164	0.66027	0.50908	0.699613	2.04475	-2.04475	0.52643	-3.88417	0.000102679	0.000277363
WBGene00000240	pah-1	715.812	-0.0102513	0.118666	-0.0863882	0.931158	0.967158	0.804733	-0.804733	0.192296	-4.18487	2.85327e-05	8.60659e-05
WBGene00000241	bbs-1	7.53217	0.347471	0.758019	0.458394	0.64667	1
WBGene00000242	bbs-2	13.3293	0.455275	0.640241	0.711099	0.477023	0.67481
WBGene00000244	bbs-8	25.523	0.0444039	0.427026	0.103984	0.917182	0.960129
WBGene00000245	bca-1	103.974	-0.429385	0.214133	-2.00523	0.0449388	0.132745	2.00933	-2.00933	0.545466	-3.68369	0.000229885	0.000575403
WBGene00000246	bcc-1	64.2723	0.452871	0.259965	1.74204	0.0815009	0.207094
WBGene00000247	bec-1	258.391	-0.614411	0.160746	-3.82225	0.000132241	0.000994823	-0.804879	0.804879	0.376254	2.13919	0.0324201	0.0494521
WBGene00000248	ben-1	127.041	-0.0452039	0.209236	-0.216043	0.828954	0.912499
WBGene00000249	bir-1	326.988	-0.315528	0.177853	-1.77409	0.0760475	0.196621	-1.552	1.552	0.414405	3.74514	0.000180295	0.000461648
WBGene00000250	bir-2	423.724	-0.428516	0.14123	-3.03418	0.00241189	0.0121699	-1.95647	1.95647	0.580156	3.37231	0.000745394	0.00167009
WBGene00000251	bli-1	13.8877	-1.03025	0.644158	-1.59938	0.109736	0.256535
WBGene00000253	bli-3	217.12	0.260932	0.170816	1.52757	0.12662	0.283401	0.221656	-0.221656	0.467132	-0.474503	0.635141	0.681388
WBGene00000254	bli-4	1373.73	0.0428369	0.153088	0.279818	0.779617	0.883483	-1.14774	1.14774	0.227325	5.04887	4.44429e-07	1.88039e-06
WBGene00000255	bli-5	11.0372	0.56227	0.572002	0.982986	0.325614	0.535562
WBGene00000256	bli-6	30.9722	-1.40474	0.561796	-2.50045	0.0124035	0.0477066
WBGene00000257	bmk-1	648.425	-0.337555	0.135	-2.50041	0.012405	0.0477066	-2.3124	2.3124	0.381113	6.0675	1.29919e-09	8.07481e-09
WBGene00000259	bpl-1	230.199	-0.827679	0.169381	-4.88651	1.02641e-06	1.29092e-05	-0.301939	0.301939	0.441676	0.683622	0.494214	0.546884
WBGene00000262	bra-1	64.8302	0.471704	0.278349	1.69465	0.0901414	0.223334
WBGene00000263	F23H11.5	926.548	-0.502127	0.147536	-3.40342	0.000665469	0.00402883	0.298411	-0.298411	0.197548	-1.51057	0.130897	0.171717
WBGene00000264	brc-1	183.767	-0.474809	0.222646	-2.13257	0.0329597	0.104193	-2.70849	2.70849	0.663921	4.07953	4.51266e-05	0.000130402
WBGene00000265	brd-1	215.667	-0.504197	0.199753	-2.5241	0.0115996	0.0452237	-1.22609	1.22609	0.52896	2.31792	0.0204534	0.0327387
WBGene00000266	bre-1	210.378	0.250845	0.199669	1.2563	0.209006	0.401874	1.6395	-1.6395	0.447671	-3.66229	0.00024997	0.000620963
WBGene00000267	bre-2	23.0136	-0.362141	0.473869	-0.764222	0.444735	0.646546
WBGene00000268	bre-3	493.123	0.42007	0.154506	2.7188	0.00655191	0.0281541	-1.18421	1.18421	0.298597	3.9659	7.31184e-05	0.000203058
WBGene00000269	bre-4	133.199	0.413846	0.20641	2.00497	0.0449663	0.132803	-1.22852	1.22852	0.639812	1.92013	0.0548413	0.0788907
WBGene00000270	bre-5	83.8175	-0.248861	0.251128	-0.990975	0.321698	0.531024
WBGene00000271	brf-1	389.512	-0.344993	0.167059	-2.06509	0.0389142	0.118878	-2.14975	2.14975	0.477497	4.50212	6.72785e-06	2.27676e-05
WBGene00000272	bro-1	31.8268	0.870053	0.423712	2.05341	0.040033	0.121357
WBGene00000273	brp-1	4615.69	0.837412	0.146656	5.71002	1.1296e-08	2.08021e-07	1.69338	-1.69338	0.123455	-13.7166	8.07092e-43	5.27745e-41
WBGene00000274	btf-1	429.822	-0.278933	0.212822	-1.31064	0.18998	0.376435	-0.584291	0.584291	0.390615	1.49583	0.134699	0.175864
WBGene00000275	bub-1	747.126	-0.748851	0.145809	-5.13584	2.80891e-07	4.0044e-06	-1.63485	1.63485	0.312679	5.22853	1.70863e-07	7.69418e-07
WBGene00000276	byn-1	779.957	-0.685383	0.121307	-5.64998	1.6047e-08	2.853e-07	0.350646	-0.350646	0.211588	-1.65721	0.097477	0.131993
WBGene00000277	cab-1	685.625	0.263025	0.149316	1.76153	0.0781491	0.200892	1.84257	-1.84257	0.21751	-8.47119	2.42905e-17	3.47535e-16
WBGene00000279	cah-1	38.2955	1.369	0.33211	4.12214	3.75373e-05	0.000330745
WBGene00000280	cah-2	17.8158	0.888654	0.512409	1.73427	0.0828708	0.20954
WBGene00000281	cah-3	334.156	-0.604346	0.165404	-3.65376	0.000258431	0.00177936	1.92119	-1.92119	0.272153	-7.05925	1.67407e-12	1.50514e-11
WBGene00000282	cah-4	451.181	0.120916	0.174454	0.693112	0.488239	0.684317	1.59062	-1.59062	0.205513	-7.73976	9.96033e-15	1.11151e-13
WBGene00000283	cah-5	165.682	-0.517212	0.187836	-2.75353	0.00589561	0.0258861	2.75075	-2.75075	0.282291	-9.74437	1.94987e-22	4.22668e-21
WBGene00000284	cah-6	37.8708	-0.514553	0.312889	-1.64452	0.100068	0.240625
WBGene00000285	cal-1	60.3891	-0.427204	0.276461	-1.54526	0.122284	0.27702
WBGene00000286	cal-2	80.5511	0.410675	0.247892	1.65667	0.0975868	0.236198	0.589723	-0.589723	0.746527	-0.789955	0.429554	0.485797
WBGene00000287	cal-3	36.6795	-0.490179	0.34497	-1.42093	0.155337	0.327609
WBGene00000288	cal-4	82.0158	0.00693375	0.268522	0.0258219	0.979399	0.989481
WBGene00000289	cam-1	277.316	-0.00563433	0.198141	-0.0284359	0.977314	0.988643	-1.01009	1.01009	0.407132	2.48099	0.0131016	0.0219479
WBGene00000292	cap-1	695.241	-0.329968	0.121807	-2.70893	0.00674997	0.0287959	-0.246983	0.246983	0.267216	0.924281	0.35534	0.411873
WBGene00000293	cap-2	716.133	-0.157211	0.122335	-1.28509	0.198761	0.38737	0.0420849	-0.0420849	0.251882	-0.167082	0.867305	0.88807
WBGene00000294	cas-1	550.654	0.217064	0.137362	1.58024	0.114052	0.263253	1.40861	-1.40861	0.229357	-6.14156	8.17148e-10	5.22657e-09
WBGene00000295	cat-1	48.2592	0.362668	0.38007	0.954213	0.339976	0.549967
WBGene00000296	cat-2	24.7438	-0.151049	0.451613	-0.334466	0.738028	0.858756
WBGene00000298	cat-4	205.06	0.0227444	0.183417	0.124004	0.901312	0.950979	2.57128	-2.57128	0.392042	-6.55868	5.42853e-11	4.02535e-10
WBGene00000301	cav-1	338.973	1.09817	0.199326	5.50944	3.59986e-08	6.00412e-07	-2.50759	2.50759	0.607547	4.12739	3.669e-05	0.000107795
WBGene00000302	cav-2	44.9555	0.3678	0.306344	1.20061	0.229902	0.428211	1.10321	-1.10321	0.535962	-2.05837	0.0395548	0.0589152
WBGene00000308	C04A11.t1	6.29595	-0.0492503	0.900206	-0.0547101	0.956369	1
WBGene00000366	cbp-1	1246.95	-0.322836	0.114194	-2.82708	0.00469741	0.0213999	-0.475317	0.475317	0.207371	2.29211	0.0218992	0.0347505
WBGene00000367	cca-1	192.42	0.0103864	0.225379	0.0460844	0.963243	0.982394	0.20307	-0.20307	0.467537	-0.434339	0.664042	0.707882
WBGene00000368	ccb-1	71.2501	0.0329529	0.260335	0.126579	0.899274	0.949491	0.628283	-0.628283	0.764518	-0.821803	0.411189	0.467903
WBGene00000369	ccf-1	547.412	-0.688464	0.167953	-4.09915	4.14674e-05	0.000360509	-0.911252	0.911252	0.285707	3.18947	0.00142536	0.00298346
WBGene00000370	ccg-1	1929.36	1.19553	0.134501	8.88857	6.1899e-19	4.01139e-17	1.67165	-1.67165	0.160154	-10.4378	1.66591e-25	4.52944e-24
WBGene00000371	cox-5B	2100.31	-0.566877	0.105062	-5.39563	6.82829e-08	1.08151e-06	0.50194	-0.50194	0.165599	-3.03105	0.00243702	0.00485807
WBGene00000372	cyp-13A7	21.5962	1.16372	0.427749	2.72056	0.00651716	0.0280304
WBGene00000373	cyp-14A5	1084.6	0.301574	0.124745	2.41752	0.0156268	0.0572567	1.08843	-1.08843	0.233957	-4.65228	3.28285e-06	1.18711e-05
WBGene00000374	cyp-31A1	107.265	-0.186207	0.251361	-0.740797	0.458817	0.658627	0.945727	-0.945727	0.612807	-1.54327	0.122765	0.162021
WBGene00000375	cyp-44A1	381.36	-0.134033	0.155232	-0.863432	0.3879	0.597283	-0.147299	0.147299	0.335309	0.439294	0.660448	0.704431
WBGene00000376	ccr-4	683.899	-0.475471	0.12802	-3.71402	0.000203991	0.00145406	-1.62389	1.62389	0.333069	4.87554	1.08513e-06	4.26081e-06
WBGene00000377	cct-1	1785.28	-0.383099	0.151774	-2.52414	0.0115983	0.0452237	-1.40153	1.40153	0.19849	7.06093	1.65387e-12	1.48874e-11
WBGene00000378	cct-2	1241.78	-0.47639	0.161063	-2.95778	0.00309865	0.0150449	-1.04463	1.04463	0.171838	6.07918	1.20801e-09	7.53174e-09
WBGene00000379	cct-4	1841.96	-0.378068	0.103975	-3.63615	0.000276744	0.00189088	-0.891204	0.891204	0.194364	4.58524	4.53473e-06	1.58756e-05
WBGene00000380	cct-5	1818.34	-0.586877	0.133927	-4.38206	1.17563e-05	0.000117834	-0.0320983	0.0320983	0.182257	0.176115	0.860203	0.882626
WBGene00000381	cct-6	958.853	-0.369641	0.174522	-2.11802	0.0341736	0.107113	-0.613931	0.613931	0.208818	2.94002	0.00328189	0.00634253
WBGene00000382	cdc-6	472.027	-0.774403	0.137149	-5.64642	1.63823e-08	2.90653e-07	-1.42558	1.42558	0.401858	3.54748	0.000388942	0.000927458
WBGene00000383	cdc-14	973.75	-0.283767	0.101567	-2.79389	0.00520788	0.0233618	-0.920392	0.920392	0.219799	4.18742	2.82149e-05	8.51721e-05
WBGene00000386	cdc-25.1	992.556	-0.419087	0.136726	-3.06516	0.00217553	0.0111361	-2.72538	2.72538	0.276151	9.86917	5.66287e-23	1.27649e-21
WBGene00000387	cdc-25.2	130.266	-0.208109	0.223215	-0.932325	0.351169	0.56144	-2.66875	2.66875	0.64157	4.15972	3.1864e-05	9.49918e-05
WBGene00000388	cdc-25.3	237.252	-0.301705	0.167425	-1.80203	0.0715403	0.188119	-3.10374	3.10374	0.652618	4.75582	1.97644e-06	7.42174e-06
WBGene00000390	cdc-42	1214.38	-0.0609378	0.118412	-0.514626	0.606815	0.773052	-0.440122	0.440122	0.227624	1.93355	0.0531688	0.0768619
WBGene00000391	cdd-1	39.0803	-0.805828	0.335211	-2.40395	0.0162192	0.0589816	3.53097	-3.53097	0.708782	-4.98174	6.30149e-07	2.58462e-06
WBGene00000392	cdd-2	277.596	-0.261808	0.149362	-1.75284	0.0796288	0.203678	0.385926	-0.385926	0.38007	-1.01541	0.309912	0.365319
WBGene00000393	cdf-1	227.531	0.216222	0.211021	1.02465	0.30553	0.513928	1.06463	-1.06463	0.428081	-2.48699	0.0128828	0.0216409
WBGene00000395	cdh-3	101.274	0.0902992	0.301545	0.299455	0.764593	0.874045	-0.292183	0.292183	0.780154	0.37452	0.708018	0.747718
WBGene00000396	cdh-4	862.955	0.254985	0.161513	1.57873	0.114399	0.263659	-0.600952	0.600952	0.264291	2.27383	0.0229764	0.0362853
WBGene00000397	cdh-5	74.6009	0.242147	0.266809	0.907566	0.364107	0.575515
WBGene00000399	cdh-7	68.2414	0.3745	0.387281	0.967	0.333544	0.543371
WBGene00000401	cdh-9	26.4022	-0.294131	0.4145	-0.709604	0.47795	0.675808
WBGene00000402	cdh-10	87.3372	0.611673	0.296142	2.06547	0.0388785	0.118812
WBGene00000403	casy-1	235.031	0.115921	0.210781	0.54996	0.582347	0.754475	0.913461	-0.913461	0.326558	-2.79724	0.00515418	0.00953469
WBGene00000405	cdk-1	1415.88	-0.751684	0.117487	-6.39801	1.57413e-10	4.01309e-09	-2.70474	2.70474	0.288303	9.38161	6.49729e-21	1.28839e-19
WBGene00000406	cdk-4	43.4284	0.543322	0.41577	1.30678	0.191286	0.378316
WBGene00000407	cdk-5	607.056	-0.319688	0.188176	-1.69888	0.0893423	0.221711	-1.81489	1.81489	0.331444	5.47571	4.35753e-08	2.14009e-07
WBGene00000408	cdk-7	682.267	-0.194833	0.141982	-1.37223	0.169991	0.349025	-1.82359	1.82359	0.318518	5.72524	1.03289e-08	5.57831e-08
WBGene00000409	cdk-8	410.157	-0.270861	0.205118	-1.32051	0.186664	0.371589	-0.702731	0.702731	0.346311	2.02919	0.0424389	0.0627268
WBGene00000410	cdk-9	225.266	-0.103692	0.194258	-0.533784	0.593491	0.763458	-0.60626	0.60626	0.438551	1.38242	0.166844	0.212195
WBGene00000411	cdl-1	832.357	-0.274249	0.1582	-1.73356	0.0829966	0.209791	-2.31214	2.31214	0.307644	7.51564	5.66329e-14	5.8726e-13
WBGene00000412	cdr-1	68.7775	-1.61668	0.721219	-2.2416	0.0249873	0.0835285	2.98897	-2.98897	0.460558	-6.48989	8.58989e-11	6.17848e-10
WBGene00000413	cdt-1	247.561	0.234723	0.228015	1.02942	0.303285	0.511601	-1.57626	1.57626	0.519741	3.03278	0.0024231	0.00483521
WBGene00000414	cec-1	231.484	-0.353816	0.273482	-1.29374	0.195754	0.38411	0.667671	-0.667671	0.603836	-1.10572	0.268849	0.322978
WBGene00000415	ced-1	853.529	0.135052	0.156811	0.861244	0.389104	0.598423	-0.893764	0.893764	0.252611	3.5381	0.00040302	0.000957854
WBGene00000416	ced-2	304.833	-0.342346	0.171083	-2.00105	0.0453873	0.133697	-2.11558	2.11558	0.460332	4.59578	4.31143e-06	1.51475e-05
WBGene00000417	ced-3	485.032	-0.235642	0.190307	-1.23822	0.215634	0.410408	-2.23441	2.23441	0.403006	5.54437	2.95009e-08	1.4848e-07
WBGene00000418	ced-4	188.004	-0.113816	0.27341	-0.416284	0.677202	0.820971	-2.7688	2.7688	0.624627	4.43272	9.30537e-06	3.07023e-05
WBGene00000419	ced-5	672.929	-0.268404	0.139732	-1.92085	0.0547506	0.154139	-1.20435	1.20435	0.278275	4.32791	1.50531e-05	4.78205e-05
WBGene00000420	ced-6	365.674	-0.0680885	0.227827	-0.29886	0.765047	0.874082	-1.43155	1.43155	0.395077	3.62346	0.000290684	0.000712923
WBGene00000421	ced-7	786.356	-0.0430172	0.138258	-0.311138	0.755696	0.869424	-0.22796	0.22796	0.227681	1.00122	0.316718	0.372123
WBGene00000422	ced-8	43.8137	-0.235535	0.321018	-0.733713	0.463123	0.662234
WBGene00000423	ced-9	178.286	-1.07676	0.194584	-5.53365	3.13638e-08	5.27949e-07
WBGene00000424	ced-10	89.1227	-0.469321	0.235722	-1.99099	0.0464815	0.136071	-1.0086	1.0086	0.603967	1.66997	0.0949259	0.128981
WBGene00000425	ced-11	35.6368	0.619236	0.404426	1.53115	0.125733	0.282122
WBGene00000426	ced-12	529.06	-0.593011	0.155078	-3.82395	0.00013133	0.000988844	-0.732698	0.732698	0.343648	2.13212	0.032997	0.0502062
WBGene00000427	ced-13	7.51051	1.83117	0.898998	2.0369	0.04166	1
WBGene00000428	ceh-1	8.93238	-0.22487	0.632792	-0.355361	0.722319	0.849395
WBGene00000429	ceh-2	11.2006	0.564097	0.603693	0.93441	0.350092	0.560193
WBGene00000431	ceh-6	10.6936	-0.153702	0.674018	-0.228038	0.819616	0.906582
WBGene00000432	ceh-7	5.64029	-0.421173	0.914586	-0.460507	0.645153	1
WBGene00000433	ceh-8	11.4879	0.460166	0.636029	0.723498	0.469374	0.667657
WBGene00000435	ceh-10	89.5707	0.31049	0.242903	1.27824	0.201164	0.390171
WBGene00000437	ceh-13	57.2632	0.209224	0.284689	0.73492	0.462388	0.661624
WBGene00000438	ceh-14	40.0461	-0.375707	0.400659	-0.937722	0.348387	0.558741
WBGene00000439	ceh-16	27.4293	0.796376	0.369545	2.15502	0.0311604	0.0997498
WBGene00000441	ceh-18	92.8285	-0.00344668	0.249789	-0.0137984	0.988991	0.994202	0.184765	-0.184765	0.611452	-0.302174	0.762519	0.796863
WBGene00000442	ceh-19	15.6797	0.633323	0.490465	1.29127	0.19661	0.384945
WBGene00000443	ceh-20	72.4692	0.184218	0.230027	0.800857	0.423214	0.628004	0.206599	-0.206599	0.617875	-0.33437	0.738101	0.774208
WBGene00000444	ceh-21	146.89	0.392699	0.270807	1.45011	0.147028	0.31568	-1.63004	1.63004	0.509082	3.20192	0.00136516	0.00287111
WBGene00000445	ceh-22	22.525	0.201028	0.500474	0.401676	0.687923	0.828209
WBGene00000446	ceh-23	28.4231	0.668223	0.452945	1.47528	0.140136	0.305479
WBGene00000447	ceh-24	52.5648	-0.0320624	0.342883	-0.0935085	0.9255	0.964201
WBGene00000448	pros-1	65.0492	0.141212	0.314083	0.449601	0.652998	0.806991
WBGene00000449	ceh-27	14.1983	-0.362019	0.594568	-0.608877	0.542606	0.725083
WBGene00000451	ceh-30	21.9946	0.385107	0.400542	0.961464	0.336319	0.54652
WBGene00000452	ceh-31	28.0929	0.478847	0.485731	0.985828	0.324218	0.534144
WBGene00000453	ceh-32	19.5541	0.0293704	0.52178	0.0562888	0.955112	0.978805
WBGene00000454	ceh-33	11.7689	0.485865	0.551205	0.88146	0.378069	0.588273
WBGene00000455	ceh-34	31.9156	-0.036591	0.414164	-0.0883491	0.929599	0.96617
WBGene00000458	ceh-37	78.4573	-0.312923	0.265507	-1.17859	0.238563	0.439157	1.74491	-1.74491	0.484572	-3.60094	0.000317073	0.000771664
WBGene00000459	ceh-38	383.692	0.0109143	0.190281	0.0573586	0.95426	0.9783	-1.32455	1.32455	0.36393	3.63957	0.000273097	0.00067418
WBGene00000460	ceh-39	112.581	0.339351	0.246802	1.37499	0.169134	0.347667
WBGene00000461	ceh-40	55.7787	0.514758	0.314102	1.63883	0.101249	0.242641
WBGene00000462	ceh-41	75.0024	0.504457	0.251557	2.00534	0.044927	0.132742
WBGene00000463	ceh-43	39.1579	0.871284	0.325845	2.67392	0.00749705	0.0314613
WBGene00000464	ceh-44	449.705	-0.589342	0.146333	-4.02741	5.63941e-05	0.000474487	-0.718481	0.718481	0.491511	1.46178	0.143801	0.186182
WBGene00000465	cpg-1	15046.2	-0.623438	0.102772	-6.06622	1.30957e-09	2.85799e-08	-3.05819	3.05819	0.268381	11.395	4.42941e-30	1.60025e-28
WBGene00000466	cel-1	355.222	-0.261702	0.170344	-1.53632	0.124461	0.280379	-0.103607	0.103607	0.371286	0.279049	0.780207	0.812344
WBGene00000467	cep-1	296.854	-0.583551	0.156287	-3.73384	0.000188583	0.00135561	-1.4235	1.4235	0.433845	3.28114	0.00103389	0.00224544
WBGene00000468	ces-1	26.0831	0.43504	0.465303	0.934961	0.349809	0.560001
WBGene00000472	cey-1	1465.09	-0.572734	0.123735	-4.6287	3.6796e-06	4.15398e-05	0.552709	-0.552709	0.149209	-3.70427	0.000212004	0.000534365
WBGene00000473	cey-2	5714.14	-1.60752	0.158276	-10.1565	3.10149e-24	3.02645e-22	-2.03123	2.03123	0.264066	7.69212	1.44717e-14	1.58807e-13
WBGene00000474	cey-3	3124.2	-1.39459	0.116686	-11.9517	6.35941e-33	1.25554e-30	-2.20384	2.20384	0.211708	10.4098	2.23656e-25	6.03948e-24
WBGene00000475	cey-4	3832.12	-0.725567	0.103979	-6.97803	2.99342e-12	9.8308e-11	0.381684	-0.381684	0.143792	-2.65441	0.00794469	0.0140309
WBGene00000477	cft-1	32.8932	-0.335644	0.367705	-0.912807	0.361344	0.572693
WBGene00000478	cfz-2	64.5151	0.258824	0.287876	0.899082	0.368609	0.58001
WBGene00000479	cgh-1	14086.2	-1.02488	0.156024	-6.56869	5.07585e-11	1.41982e-09	-1.87279	1.87279	0.229104	8.17442	2.97281e-16	3.8814e-15
WBGene00000480	cgp-1	1070.99	-0.544044	0.13047	-4.16987	3.04771e-05	0.000274084	-1.29948	1.29948	0.212136	6.12569	9.02906e-10	5.73338e-09
WBGene00000481	cha-1	16.5459	-0.498108	0.475956	-1.04654	0.295311	0.503321
WBGene00000482	chd-3	313.05	0.779751	0.161597	4.82529	1.39803e-06	1.71378e-05	-0.13679	0.13679	0.409367	0.33415	0.738266	0.774279
WBGene00000483	che-1	14.4781	0.546186	0.5621	0.971689	0.331206	0.540923
WBGene00000484	che-2	31.8504	0.481479	0.365671	1.3167	0.187939	0.373349
WBGene00000485	che-3	349.46	0.368181	0.266222	1.38298	0.16667	0.344269	0.796251	-0.796251	0.530364	-1.50133	0.13327	0.174316
WBGene00000487	che-6	18.2854	1.02634	0.512078	2.00427	0.045041	0.132976
WBGene00000488	che-7	20.3999	-0.00267052	0.463544	-0.00576109	0.995403	0.997401
WBGene00000490	che-11	30.4213	0.400914	0.355032	1.12923	0.258799	0.463176
WBGene00000491	che-12	118.487	0.219382	0.290915	0.75411	0.450783	0.651612
WBGene00000492	che-13	8.04398	1.19881	0.682856	1.75559	0.0791591	1
WBGene00000493	che-14	41.6574	0.564662	0.406653	1.38856	0.164966	0.341831
WBGene00000496	chs-1	2379.14	-0.681792	0.179472	-3.79888	0.000145352	0.00107891	-2.74564	2.74564	0.343494	7.99327	1.31406e-15	1.59706e-14
WBGene00000497	chs-2	115.078	0.104895	0.313735	0.334344	0.73812	0.858805	-0.458583	0.458583	0.713773	0.642477	0.520564	0.572678
WBGene00000498	chk-1	600.354	-0.300923	0.16459	-1.82832	0.0675012	0.180228	-1.66745	1.66745	0.399076	4.17827	2.93733e-05	8.83993e-05
WBGene00000499	chk-2	109.743	-0.491206	0.240029	-2.04645	0.0407126	0.122933	-1.1614	1.1614	0.59869	1.9399	0.0523923	0.0758514
WBGene00000500	chn-1	538.203	-0.31724	0.138555	-2.28963	0.022043	0.0753584	-0.99787	0.99787	0.328615	3.0366	0.00239264	0.00478408
WBGene00000501	cho-1	62.3135	0.411184	0.298031	1.37967	0.167689	0.345616
WBGene00000502	chp-1	322.229	-0.541773	0.182641	-2.96633	0.00301379	0.0146706	-0.233855	0.233855	0.372148	0.628392	0.529747	0.581891
WBGene00000503	cht-1	258.41	2.22343	0.24176	9.19686	3.6857e-20	2.57529e-18
WBGene00000506	cic-1	241.971	-0.675213	0.180983	-3.7308	0.00019087	0.00137089	-0.185421	0.185421	0.39109	0.474114	0.635419	0.681593
WBGene00000507	cit-1.1	149.617	-0.428854	0.209514	-2.04689	0.0406685	0.122823
WBGene00000508	cit-1.2	270.064	-0.394971	0.206484	-1.91284	0.0557686	0.156331	-0.315942	0.315942	0.362671	0.871153	0.383671	0.440325
WBGene00000509	cka-1	291.509	0.32198	0.170982	1.88312	0.0596837	0.164508	0.0758124	-0.0758124	0.294578	-0.257359	0.796901	0.82733
WBGene00000510	cka-2	54.6296	0.0274721	0.291837	0.0941348	0.925002	0.964093
WBGene00000511	ckb-1	37.9649	-0.0642626	0.363978	-0.176556	0.859857	0.930142
WBGene00000512	ckb-2	85.985	1.66552	0.25421	6.55176	5.68633e-11	1.57501e-09	0.665368	-0.665368	0.91215	-0.72945	0.465726	0.520015
WBGene00000513	ckb-3	11.2056	0.607279	0.655437	0.926525	0.354173	0.564935
WBGene00000514	ckb-4	66.0065	0.234026	0.276608	0.846057	0.397521	0.604942	0.502486	-0.502486	0.618047	-0.813021	0.416206	0.47266
WBGene00000515	ckc-1	152.106	-0.775462	0.192546	-4.02742	5.63927e-05	0.000474487	0.683444	-0.683444	0.435477	-1.56941	0.116551	0.154568
WBGene00000516	cki-1	41.8403	-0.346705	0.299685	-1.1569	0.247313	0.449249
WBGene00000517	cki-2	216.022	-0.185198	0.206847	-0.895338	0.370606	0.58151	-1.2482	1.2482	0.487173	2.56214	0.010403	0.017901
WBGene00000518	ckk-1	26.7977	0.270941	0.427597	0.633636	0.526318	0.713013
WBGene00000519	cku-70	374.61	-0.624179	0.136497	-4.57284	4.81152e-06	5.30486e-05	-0.689745	0.689745	0.307001	2.24672	0.024658	0.0386631
WBGene00000520	cku-80	575.917	-0.33074	0.126978	-2.60471	0.00919518	0.0372258	-1.84998	1.84998	0.340223	5.43756	5.40159e-08	2.61072e-07
WBGene00000521	cky-1	73.2582	0.220127	0.270972	0.812361	0.416585	0.621979
WBGene00000522	clc-1	1025.31	0.748351	0.16812	4.45129	8.53579e-06	8.85875e-05	1.49643	-1.49643	0.213902	-6.99587	2.63614e-12	2.29957e-11
WBGene00000523	clc-2	28.777	0.808663	0.376588	2.14734	0.0317659	0.101192
WBGene00000524	clc-3	78.1852	0.376272	0.279192	1.34772	0.177749	0.3592
WBGene00000525	clc-4	10.4971	0.632382	0.618	1.02327	0.306179	0.514409
WBGene00000526	clc-5	15.4126	0.622251	0.482563	1.28947	0.197234	0.385633
WBGene00000527	cle-1	456.905	0.521434	0.139436	3.7396	0.000184313	0.00132942	0.568037	-0.568037	0.301632	-1.88321	0.0596718	0.0850825
WBGene00000528	clh-1	252.147	0.145568	0.21142	0.688525	0.491122	0.686318	1.68916	-1.68916	0.32403	-5.21297	1.85844e-07	8.29796e-07
WBGene00000529	clh-2	124.486	0.262079	0.25763	1.01727	0.309027	0.517503
WBGene00000530	clh-3	143.122	0.287344	0.21315	1.34809	0.177631	0.359132	1.11191	-1.11191	0.534201	-2.08145	0.0373931	0.0560861
WBGene00000531	clh-4	43.7484	0.0168297	0.294138	0.0572169	0.954372	0.978343
WBGene00000532	clh-5	502.952	-0.228045	0.16149	-1.41213	0.157913	0.331667	-0.587976	0.587976	0.297899	1.97374	0.048411	0.0706564
WBGene00000533	clh-6	218.749	-0.434499	0.205661	-2.11269	0.034627	0.108215	-0.786773	0.786773	0.510201	1.54209	0.123053	0.162265
WBGene00000534	cpi-2	2180.59	0.339705	0.152227	2.23158	0.0256429	0.0852371	1.87155	-1.87155	0.141427	-13.2333	5.6339e-40	3.16138e-38
WBGene00000535	cpi-1	7447.53	0.615899	0.176445	3.4906	0.000481931	0.00305667	1.20679	-1.20679	0.150003	-8.0451	8.61774e-16	1.07039e-14
WBGene00000536	clk-1	216.765	-0.367414	0.181363	-2.02585	0.0427802	0.127589	-0.537421	0.537421	0.370799	1.44936	0.147237	0.190069
WBGene00000537	clk-2	370.606	-0.207946	0.189764	-1.09582	0.27316	0.479724	-1.07341	1.07341	0.4697	2.28532	0.0222941	0.0352994
WBGene00000539	cln-3.1	62.3886	-0.334789	0.281366	-1.18987	0.234098	0.433752	1.44872	-1.44872	0.550312	-2.63254	0.00847496	0.01485
WBGene00000540	cln-3.2	90.8741	0.0257469	0.255983	0.10058	0.919884	0.961743	0.086008	-0.086008	0.578016	-0.148799	0.881712	0.899331
WBGene00000541	cln-3.3	46.3583	0.48008	0.313351	1.53208	0.125502	0.281888
WBGene00000542	clp-1	800.341	-0.342097	0.110325	-3.10081	0.00192991	0.0100546	0.679628	-0.679628	0.211073	-3.21988	0.00128246	0.00271815
WBGene00000543	clp-2	208.268	-0.400154	0.224777	-1.78022	0.0750393	0.194786	-0.298203	0.298203	0.492478	0.605516	0.544836	0.595983
WBGene00000544	clp-3	18.2089	0.388004	0.565487	0.686141	0.492624	0.687015
WBGene00000545	clp-4	317.632	0.701143	0.155233	4.5167	6.28102e-06	6.74389e-05	0.604015	-0.604015	0.334959	-1.80325	0.0713491	0.0998963
WBGene00000546	clp-6	155.711	0.366158	0.321943	1.13734	0.255397	0.459217	-0.499705	0.499705	0.651796	0.766658	0.443285	0.499113
WBGene00000547	clp-7	499.965	-0.516372	0.144108	-3.58323	0.000339369	0.0022641	-0.805263	0.805263	0.275526	2.92264	0.00347079	0.00667192
WBGene00000548	clr-1	774.72	-0.192071	0.159149	-1.20686	0.227486	0.425384	-0.469205	0.469205	0.298712	1.57076	0.116238	0.154282
WBGene00000549	cls-2	465.41	-0.144037	0.173963	-0.827975	0.407685	0.614313	-1.01965	1.01965	0.379721	2.68527	0.00724709	0.0129229
WBGene00000550	clu-1	892.451	-0.764725	0.176983	-4.32089	1.55403e-05	0.000150949	-1.0835	1.0835	0.288939	3.74995	0.000176872	0.000454503
WBGene00000552	cmd-1	1071.09	-0.337267	0.112257	-3.00443	0.00266077	0.0132484	0.469036	-0.469036	0.198931	-2.35778	0.0183845	0.0297522
WBGene00000553	cmk-1	45.9078	0.137446	0.346552	0.396609	0.691656	0.830367
WBGene00000554	cnb-1	177.105	0.146997	0.184416	0.797096	0.425396	0.630223	1.62445	-1.62445	0.441806	-3.67684	0.000236141	0.000589571
WBGene00000556	cnc-2	126.839	1.81488	0.544557	3.33277	0.000859849	0.0050256	3.46848	-3.46848	0.411672	-8.42534	3.59711e-17	5.07314e-16
WBGene00000557	cnc-3	167.906	0.864823	0.223765	3.86487	0.000111147	0.00085897	1.98592	-1.98592	0.358149	-5.54495	2.94038e-08	1.48086e-07
WBGene00000558	cnc-4	264.171	2.86858	0.517024	5.54825	2.88543e-08	4.89428e-07	1.58904	-1.58904	0.748025	-2.12431	0.033644	0.0510728
WBGene00000560	cnc-6	58.8369	3.95769	0.47714	8.29461	1.08944e-16	6.16587e-15
WBGene00000561	cnd-1	11.4638	0.434802	0.591439	0.735158	0.462243	0.661588
WBGene00000562	cng-1	119.07	0.708911	0.244431	2.90025	0.00372864	0.0175936	2.05844	-2.05844	0.588487	-3.49786	0.000469005	0.00109969
WBGene00000563	cng-3	27.6969	0.395789	0.431049	0.918199	0.358515	0.569645
WBGene00000564	cnk-1	382.068	-0.131487	0.186629	-0.704535	0.4811	0.678229	-1.24368	1.24368	0.467541	2.66005	0.00781298	0.0138292
WBGene00000565	cnt-1	186.693	0.496653	0.265838	1.86825	0.0617267	0.168905	1.28433	-1.28433	0.502447	-2.55615	0.0105838	0.0181844
WBGene00000566	cnt-2	368.478	-0.234062	0.209856	-1.11534	0.264703	0.470568	-0.308095	0.308095	0.313758	0.981953	0.326123	0.381756
WBGene00000567	cnx-1	1036.63	0.0247454	0.102282	0.241934	0.808832	0.900602	-0.245942	0.245942	0.278691	0.882488	0.377513	0.434329
WBGene00000583	cof-2	10.0011	-1.3291	0.674376	-1.97086	0.0487404	0.141271
WBGene00000584	cog-1	14.168	0.07566	0.614838	0.123057	0.902062	0.951429
WBGene00000585	cogc-2	511.966	-0.124536	0.209582	-0.594212	0.55237	0.731418	-1.39831	1.39831	0.410329	3.40777	0.000654966	0.00148681
WBGene00000591	coh-1	87.7426	0.196375	0.273123	0.718997	0.472143	0.670279
WBGene00000592	coh-3	199.565	-0.496389	0.212019	-2.34124	0.0192196	0.0677737	-3.85694	3.85694	0.711043	5.42434	5.81686e-08	2.79096e-07
WBGene00000597	col-8	3053.04	-2.54353	0.159116	-15.9854	1.61614e-57	1.71503e-54	2.15951	-2.15951	0.197757	-10.92	9.24744e-28	2.93838e-26
WBGene00000599	col-10	7.10131	-0.422046	0.693602	-0.608484	0.542866	1
WBGene00000603	col-14	4.52973	-0.0758383	1.08857	-0.069668	0.944458	1
WBGene00000608	col-19	4011.63	-1.81039	0.13128	-13.7904	2.91239e-43	1.26793e-40	0.532165	-0.532165	0.177122	-3.00451	0.00266005	0.00526027
WBGene00000609	col-20	5860.4	-2.85699	0.200254	-14.2668	3.52288e-46	1.81258e-43	1.7254	-1.7254	0.224829	-7.6743	1.66323e-14	1.8126e-13
WBGene00000611	col-34	110.559	-0.0377258	0.24318	-0.155135	0.876715	0.938284	1.0491	-1.0491	0.442494	-2.37087	0.0177461	0.0288429
WBGene00000613	col-36	20.7632	-0.741465	0.721172	-1.02814	0.303885	0.512074
WBGene00000614	col-37	8.83451	-0.361171	0.876466	-0.412076	0.680283	0.822863
WBGene00000615	col-38	24.6847	0.852143	0.54609	1.56044	0.118655	0.271197
WBGene00000616	col-39	16.6026	0.729289	0.702386	1.0383	0.299129	0.507131
WBGene00000617	col-40	5.01594	-0.20742	0.830033	-0.249894	0.802669	1
WBGene00000618	col-41	18.8457	-0.316725	0.662998	-0.477717	0.632852	0.793616
WBGene00000620	col-43	147.093	-0.45081	0.212028	-2.12618	0.0334881	0.10553	-0.284516	0.284516	0.35527	0.800845	0.423221	0.4798
WBGene00000621	col-44	9.40879	0.231223	0.914327	0.252889	0.800354	0.895677
WBGene00000625	col-48	28.1455	-0.436888	0.54684	-0.798933	0.424329	0.629231
WBGene00000626	col-49	14.0541	-0.910004	0.695	-1.30936	0.190413	0.377188
WBGene00000627	col-50	14.7401	-0.889158	0.945476	-0.940435	0.346995	0.557233
WBGene00000630	col-53	27.1698	-0.520861	0.461322	-1.12906	0.258872	0.463258
WBGene00000631	col-54	15.6388	-0.854334	0.650488	-1.31337	0.189057	0.374957
WBGene00000634	col-58	26.1893	-1.39525	0.492849	-2.831	0.00464032	0.0211795
WBGene00000636	col-60	24.2818	0.430538	0.506377	0.850232	0.395196	0.603095
WBGene00000637	col-61	46.8576	0.386751	0.356127	1.08599	0.277483	0.484281
WBGene00000639	col-63	8.68588	0.0116498	0.86037	0.0135404	0.989197	0.994301
WBGene00000640	col-64	17.6824	0.0525985	0.46982	0.111955	0.910859	0.956786
WBGene00000644	col-68	15.2748	-1.12406	0.548167	-2.05058	0.0403079	0.121994
WBGene00000646	H17B01.2	18.5982	-0.0127811	0.644282	-0.0198377	0.984173	0.99212
WBGene00000647	col-71	24.1921	-0.180887	0.429821	-0.420842	0.67387	0.819132
WBGene00000648	col-72	10.578	0.076749	0.631554	0.121524	0.903276	0.952152
WBGene00000650	col-74	9.24075	-0.00256187	0.916756	-0.00279449	0.99777	0.998653
WBGene00000651	col-75	18.8064	-1.45243	0.50536	-2.87405	0.00405239	0.0188353
WBGene00000652	col-76	114.756	-0.593313	0.269726	-2.19969	0.0278287	0.0909011	1.87315	-1.87315	0.520641	-3.59778	0.000320942	0.00078012
WBGene00000654	col-78	23.2937	0.489827	0.43928	1.11507	0.264822	0.470612
WBGene00000655	col-79	25.6863	-1.16096	0.655988	-1.76979	0.076762	0.198076
WBGene00000656	col-80	3891.63	-2.66449	0.225821	-11.7992	3.94201e-32	7.27515e-30	1.49835	-1.49835	0.172339	-8.69421	3.49244e-18	5.3629e-17
WBGene00000657	col-81	99.0051	1.31192	0.817419	1.60496	0.108503	0.254751
WBGene00000658	col-83	10.8289	-0.192891	0.561346	-0.343623	0.73113	0.854549
WBGene00000659	col-84	33.3721	-0.895063	0.575824	-1.5544	0.120088	0.273403
WBGene00000662	col-87	14.2067	0.875372	0.659546	1.32724	0.184431	0.368363
WBGene00000664	col-89	12.6529	0.96098	0.578566	1.66097	0.0967196	0.234667
WBGene00000667	col-92	17.0881	0.581408	0.571517	1.01731	0.309008	0.517503
WBGene00000668	col-93	564.858	-2.07598	0.467573	-4.43991	8.99971e-06	9.27221e-05	1.86409	-1.86409	0.301685	-6.17891	6.45445e-10	4.18587e-09
WBGene00000670	col-95	11186.5	-0.989674	0.131737	-7.51252	5.79983e-14	2.43751e-12	0.662988	-0.662988	0.100603	-6.59014	4.39425e-11	3.30174e-10
WBGene00000671	col-96	147.47	-0.0493912	0.251447	-0.196428	0.844275	0.920382	1.15526	-1.15526	0.427723	-2.70095	0.0069141	0.0123873
WBGene00000672	col-97	7.78701	0.994417	0.737289	1.34875	0.177418	1
WBGene00000673	col-98	1966.66	-1.59564	0.147436	-10.8226	2.69069e-27	3.35921e-25	0.769544	-0.769544	0.178292	-4.31621	1.58731e-05	5.01951e-05
WBGene00000674	col-99	10.6248	-0.438558	0.781471	-0.561196	0.574664	0.74877
WBGene00000675	col-101	11445.7	-1.34549	0.127405	-10.5607	4.53326e-26	4.93399e-24	1.09596	-1.09596	0.116714	-9.39018	5.9896e-21	1.1937e-19
WBGene00000677	col-103	1334.41	-1.44465	0.157982	-9.1444	5.9964e-20	4.08887e-18	0.829376	-0.829376	0.148403	-5.58869	2.28794e-08	1.16914e-07
WBGene00000678	col-104	14.3977	0.710489	0.674565	1.05326	0.292224	0.499866
WBGene00000680	col-106	6731.49	-0.7071	0.173623	-4.07263	4.64858e-05	0.000398628	1.58002	-1.58002	0.136897	-11.5417	8.13149e-31	3.03473e-29
WBGene00000681	col-107	11.7192	-0.556926	0.603269	-0.92318	0.355913	0.566997
WBGene00000682	col-108	8.231	1.20157	0.728941	1.64837	0.0992764	1
WBGene00000683	col-109	5.97945	-0.56556	0.717707	-0.78801	0.430691	1
WBGene00000684	col-110	13.9656	-0.65642	0.751908	-0.873006	0.38266	0.592214
WBGene00000685	col-111	13.7363	-0.2205	0.584226	-0.377423	0.70586	0.838508
WBGene00000687	col-113	9.58633	0.635872	0.651986	0.975284	0.329419	0.53914
WBGene00000689	col-115	58.959	0.224685	0.367165	0.611944	0.540575	0.723279
WBGene00000690	col-116	17.9674	-0.330737	0.481163	-0.687371	0.491849	0.686825
WBGene00000692	col-118	149.182	-0.0923426	0.223035	-0.414028	0.678854	0.821838	1.27794	-1.27794	0.39535	-3.23242	0.00122746	0.00261488
WBGene00000693	col-119	10140.6	-1.99783	0.132319	-15.0986	1.6536e-51	1.33698e-48	1.82965	-1.82965	0.171193	-10.6877	1.16224e-26	3.38074e-25
WBGene00000695	col-121	64.879	-0.0599805	0.26119	-0.229644	0.818369	0.906065
WBGene00000696	col-122	16804.4	-0.714328	0.140816	-5.07276	3.9209e-07	5.44787e-06	1.28267	-1.28267	0.0923451	-13.89	7.28628e-44	4.92727e-42
WBGene00000698	col-124	6297.48	-1.36209	0.117299	-11.6121	3.57604e-31	6.19568e-29	0.782229	-0.782229	0.182938	-4.27593	1.90344e-05	5.94082e-05
WBGene00000699	col-125	8.48498	0.610699	0.802442	0.761051	0.446627	1
WBGene00000702	col-128	31.576	0.0508433	0.479631	0.106005	0.915578	0.959498
WBGene00000703	col-129	187.841	0.344844	0.723833	0.476414	0.633779	0.794048	0.212595	-0.212595	0.465379	-0.456821	0.6478	0.692901
WBGene00000705	col-131	6.0258	-0.72884	0.910989	-0.800053	0.42368	1
WBGene00000706	col-132	21.1164	-1.08038	0.563931	-1.9158	0.0553908	0.155503
WBGene00000708	col-135	38.5594	-2.02885	0.838423	-2.41985	0.0155271	0.0569652
WBGene00000712	col-139	162.399	0.595842	0.587035	1.015	0.310105	0.518439	1.06405	-1.06405	0.506878	-2.09921	0.0357981	0.053898
WBGene00000713	col-140	12868.1	-1.74731	0.126825	-13.7773	3.48965e-43	1.45369e-40	1.72497	-1.72497	0.157216	-10.972	5.21214e-28	1.6832e-26
WBGene00000714	col-141	9.15652	-0.950375	0.612404	-1.55188	0.120692	0.274328
WBGene00000715	col-142	271.981	-0.838563	0.211915	-3.95708	7.58723e-05	0.000618749	1.15537	-1.15537	0.263349	-4.38725	1.14795e-05	3.73002e-05
WBGene00000716	col-143	11832.3	-1.01203	0.143747	-7.04037	1.91732e-12	6.47202e-11	0.961002	-0.961002	0.126368	-7.60481	2.85324e-14	3.02611e-13
WBGene00000717	col-144	18.9131	-0.633748	0.472496	-1.34128	0.17983	0.361941
WBGene00000721	col-148	13.6049	-0.476743	0.657241	-0.725369	0.468226	0.666723
WBGene00000722	col-149	22.4328	-0.752602	0.619341	-1.21517	0.224303	0.421754
WBGene00000723	col-150	73.7956	-1.10836	0.248722	-4.45623	8.34131e-06	8.69945e-05	1.4696	-1.4696	0.380286	-3.86445	0.00011134	0.000298213
WBGene00000724	col-151	7.27511	-0.0878774	0.911222	-0.0964391	0.923172	1
WBGene00000726	col-153	58.4363	-0.302315	0.329662	-0.917046	0.359118	0.570284
WBGene00000728	col-155	90.9273	-0.411823	0.309421	-1.33095	0.183206	0.366692	1.86495	-1.86495	0.440551	-4.23321	2.3038e-05	7.07596e-05
WBGene00000730	col-157	9.00165	-0.633614	0.715445	-0.885622	0.375821	0.585957
WBGene00000731	col-158	101.077	-0.099606	0.213599	-0.466323	0.640985	0.799329	1.60201	-1.60201	0.361395	-4.43285	9.29946e-06	3.06956e-05
WBGene00000732	col-159	141.317	-0.923798	0.317598	-2.9087	0.00362931	0.0172156	1.69185	-1.69185	0.376361	-4.49529	6.94742e-06	2.34205e-05
WBGene00000733	col-160	2271.71	-1.89815	0.188322	-10.0793	6.82131e-24	6.43439e-22	0.375817	-0.375817	0.184369	-2.0384	0.04151	0.0614825
WBGene00000736	col-163	20.3189	-0.632875	0.677098	-0.934688	0.349949	0.560071
WBGene00000737	col-164	12.5151	-1.23975	0.647435	-1.91486	0.0555098	0.155734
WBGene00000738	col-165	30.4456	-0.804523	0.564543	-1.42509	0.154132	0.325795
WBGene00000739	col-166	143.802	-0.170517	0.2174	-0.784346	0.432837	0.63662	1.24	-1.24	0.350814	-3.53464	0.000408327	0.000969301
WBGene00000747	col-174	36.0007	-1.79882	0.510876	-3.52104	0.000429854	0.00277404
WBGene00000749	col-176	10.7142	0.18394	0.715773	0.256981	0.797193	0.894321
WBGene00000750	col-177	6.2376	1.75048	0.845929	2.0693	0.0385179	1
WBGene00000751	col-178	4226.83	-1.56291	0.132917	-11.7585	6.3826e-32	1.16527e-29	1.70883	-1.70883	0.143896	-11.8755	1.58672e-32	6.53861e-31
WBGene00000752	col-179	381.659	-1.34699	0.211726	-6.36192	1.99249e-10	5.00451e-09	0.715251	-0.715251	0.328148	-2.17966	0.0292825	0.045136
WBGene00000753	col-180	6.0392	-0.848367	0.875403	-0.969116	0.332487	1
WBGene00000754	col-181	12658	-0.733103	0.148053	-4.95161	7.36006e-07	9.57457e-06	1.34037	-1.34037	0.0979834	-13.6796	1.34419e-42	8.64653e-41
WBGene00000755	col-182	15.4649	-0.43551	1.40191	-0.310656	0.756063	0.869787
WBGene00000756	col-183	42.1239	1.23246	1.58243	0.778845	0.436071	0.639217
WBGene00000757	col-184	13413.2	-0.498859	0.127082	-3.92548	8.65587e-05	0.00069194	1.23211	-1.23211	0.106952	-11.5203	1.04276e-30	3.8734e-29
WBGene00000759	col-186	8.91472	0.740765	0.844681	0.876976	0.3805	0.590728
WBGene00000761	coq-1	299.297	-0.525375	0.142554	-3.68544	0.000228304	0.00160498	1.83432	-1.83432	0.308003	-5.95554	2.59219e-09	1.54788e-08
WBGene00000762	coq-2	248.195	-0.314042	0.158324	-1.98354	0.0473075	0.138037	0.0817555	-0.0817555	0.382153	-0.213934	0.830599	0.857029
WBGene00000763	coq-3	160.177	-0.425864	0.184211	-2.31183	0.0207869	0.0720435	0.509398	-0.509398	0.465786	-1.09363	0.274117	0.32836
WBGene00000764	coq-4	141.115	-0.685277	0.209779	-3.26666	0.00108826	0.00613462	-0.240901	0.240901	0.5651	0.426298	0.66989	0.713156
WBGene00000765	coq-5	203.751	-1.01338	0.183446	-5.52413	3.31115e-08	5.53891e-07	-1.18305	1.18305	0.61578	1.92123	0.0547026	0.0787242
WBGene00000766	coq-6	363.952	-0.209023	0.14989	-1.39451	0.163165	0.339133	-0.297837	0.297837	0.318547	0.934986	0.349795	0.40628
WBGene00000767	coq-8	465.945	-0.464708	0.149576	-3.10684	0.00189099	0.00989737	-1.3533	1.3533	0.305772	4.42586	9.60609e-06	3.16022e-05
WBGene00000768	cor-1	74.115	-0.356925	0.248563	-1.43595	0.151016	0.321035	0.890217	-0.890217	0.531657	-1.67442	0.0940482	0.127964
WBGene00000770	cpb-1	326.456	-0.110334	0.193012	-0.571642	0.567564	0.743571	-1.99743	1.99743	0.415671	4.80533	1.545e-06	5.92367e-06
WBGene00000771	cpb-2	34.7717	0.937207	0.39685	2.36162	0.0181954	0.0649033
WBGene00000772	cpb-3	485.803	-0.550851	0.211086	-2.6096	0.0090647	0.0367991	-1.30679	1.30679	0.466459	2.80151	0.00508646	0.00942484
WBGene00000773	cpf-1	565.423	-1.01659	0.195679	-5.1952	2.04505e-07	2.97795e-06	-1.41253	1.41253	0.312012	4.52715	5.9784e-06	2.03973e-05
WBGene00000774	cpf-2	533.497	-0.424851	0.129833	-3.27229	0.00106681	0.00603175	-1.12411	1.12411	0.329634	3.41018	0.000649207	0.00147601
WBGene00000775	cpin-1	91.692	0.0940405	0.227161	0.413982	0.678888	0.821838	1.5246	-1.5246	0.596981	-2.55385	0.0106538	0.0182903
WBGene00000776	cpl-1	6784.17	-0.593238	0.104549	-5.67427	1.39283e-08	2.50783e-07	2.42155	-2.42155	0.129258	-18.7343	2.60197e-78	6.05493e-76
WBGene00000777	cpn-1	1088.37	-0.226304	0.111504	-2.02955	0.0424018	0.12675	-0.750365	0.750365	0.200283	3.74652	0.000179302	0.000459691
WBGene00000778	cpn-2	31.652	0.239231	0.383158	0.624366	0.532387	0.717983
WBGene00000779	cpn-3	4920.05	-0.665535	0.164773	-4.03909	5.36589e-05	0.000454175	1.59375	-1.59375	0.132631	-12.0164	2.91333e-33	1.24596e-31
WBGene00000780	cpn-4	265.304	-0.0273783	0.164527	-0.166406	0.867837	0.933955	0.517285	-0.517285	0.369652	-1.39939	0.161697	0.20638
WBGene00000781	cpr-1	743.468	1.43455	0.564901	2.53947	0.011102	0.0435842	4.21498	-4.21498	0.336821	-12.514	6.2578e-36	3.13365e-34
WBGene00000782	cpr-2	11.013	-0.255653	0.76746	-0.333115	0.739047	0.859336
WBGene00000783	cpr-3	592.557	0.653394	0.122922	5.31553	1.06347e-07	1.63853e-06	0.981301	-0.981301	0.260722	-3.76378	0.000167364	0.000432175
WBGene00000784	cpr-4	1274.54	1.96149	0.199834	9.81563	9.64383e-23	8.35421e-21	5.17586	-5.17586	0.253947	-20.3816	2.4338e-92	9.16963e-90
WBGene00000785	cpr-5	641.423	0.0727035	0.230737	0.315093	0.752691	0.867578	5.86661	-5.86661	0.201818	-29.0688	8.91331e-186	2.35074e-182
WBGene00000786	cpr-6	7564.24	-0.201613	0.105695	-1.9075	0.056456	0.157763	3.21833	-3.21833	0.158081	-20.3587	3.88889e-92	1.39859e-89
WBGene00000787	cps-6	527.234	-0.399793	0.156212	-2.5593	0.0104883	0.0416174	-0.183198	0.183198	0.264041	0.693823	0.487793	0.541065
WBGene00000788	cpz-1	4229.65	0.111182	0.129413	0.859127	0.390271	0.599458	2.24307	-2.24307	0.136908	-16.3837	2.4999e-60	3.35241e-58
WBGene00000789	cpz-2	1924.99	0.200082	0.161331	1.2402	0.214902	0.40929	2.15058	-2.15058	0.178001	-12.0818	1.31762e-33	5.79167e-32
WBGene00000792	crb-1	226.481	0.0933647	0.277835	0.336044	0.736838	0.857901	-0.00950077	0.00950077	0.489814	0.0193967	0.984525	0.987547
WBGene00000793	crh-1	505.547	-0.11674	0.127887	-0.912838	0.361328	0.572693	0.00663615	-0.00663615	0.263524	-0.0251824	0.97991	0.984104
WBGene00000794	crn-1	691.281	-0.353443	0.112112	-3.1526	0.00161825	0.00865396	-2.18534	2.18534	0.294161	7.42907	1.09367e-13	1.11222e-12
WBGene00000795	crn-2	142.233	-0.486324	0.190976	-2.54652	0.0108802	0.042852	-0.206646	0.206646	0.425523	0.485628	0.627231	0.674181
WBGene00000796	crn-3	1027.86	-0.785386	0.103913	-7.5581	4.08989e-14	1.74041e-12	-1.02071	1.02071	0.247455	4.12485	3.70972e-05	0.000108829
WBGene00000797	crn-4	130.97	-0.0731737	0.23837	-0.306975	0.758862	0.871038	-0.322901	0.322901	0.676018	0.477651	0.632899	0.679351
WBGene00000798	crn-5	196.861	-0.91239	0.165687	-5.50672	3.65591e-08	6.08408e-07	-1.34335	1.34335	0.474832	2.82911	0.00466776	0.00873493
WBGene00000799	crn-6	162.353	-0.158685	0.282883	-0.560955	0.574828	0.748811	0.939299	-0.939299	0.50221	-1.87033	0.0614376	0.0873955
WBGene00000800	cars-1	715.202	-0.383489	0.186173	-2.05985	0.0394125	0.120055	-0.859023	0.859023	0.303944	2.82625	0.00470963	0.00880703
WBGene00000801	cars-2	69.9856	-0.283864	0.295201	-0.961597	0.336252	0.54652
WBGene00000802	crt-1	3815.19	0.887119	0.162549	5.45755	4.82749e-08	7.89653e-07	0.784346	-0.784346	0.165261	-4.74612	2.07359e-06	7.7571e-06
WBGene00000803	csb-1	254.646	0.4603	0.239523	1.92173	0.0546393	0.153953	-1.18563	1.18563	0.578232	2.05043	0.0403221	0.0599339
WBGene00000804	csc-1	335.385	-0.940925	0.153178	-6.14271	8.11277e-10	1.8505e-08	-1.49756	1.49756	0.436725	3.42908	0.000605637	0.00138531
WBGene00000812	csk-1	157.748	-0.185957	0.207111	-0.89786	0.36926	0.580417	-0.978135	0.978135	0.518114	1.88787	0.0590428	0.0842768
WBGene00000813	csn-1	314.514	-0.915987	0.143405	-6.38743	1.687e-10	4.27517e-09	-0.617598	0.617598	0.361935	1.70638	0.0879377	0.120478
WBGene00000814	csn-2	534.634	-0.14917	0.170638	-0.874194	0.382012	0.592096	-0.79082	0.79082	0.277038	2.85455	0.00430976	0.00812651
WBGene00000815	csn-3	414.212	-0.785156	0.140391	-5.59264	2.23649e-08	3.87483e-07	-1.42653	1.42653	0.352484	4.04709	5.18586e-05	0.000148018
WBGene00000816	csn-4	275.804	-0.353745	0.176868	-2.00005	0.045495	0.133945	-1.66278	1.66278	0.485702	3.42345	0.000618307	0.00141224
WBGene00000817	csn-5	555.745	-0.636263	0.130908	-4.86037	1.17164e-06	1.45845e-05	-1.20477	1.20477	0.315187	3.82241	0.000132154	0.000348766
WBGene00000818	csn-6	392.281	-0.591965	0.162126	-3.65127	0.000260947	0.00179523	-1.42604	1.42604	0.400129	3.56394	0.000365332	0.000875912
WBGene00000819	csp-1	16.5001	1.03249	0.468627	2.20321	0.0275797	0.0902772
WBGene00000820	csp-2	29.4807	0.989616	0.464503	2.13048	0.0331317	0.10462
WBGene00000821	csp-3	19.8024	-0.22514	0.551281	-0.408395	0.682984	0.824568
WBGene00000822	csq-1	956.899	-1.28942	0.159972	-8.0603	7.61096e-16	4.02575e-14	1.8932	-1.8932	0.20183	-9.38018	6.58595e-21	1.3027e-19
WBGene00000829	ctb-1	1837	0.0681226	0.196797	0.346157	0.729225	0.853426	1.47061	-1.47061	0.163068	-9.01835	1.90948e-19	3.27009e-18
WBGene00000831	ctl-2	329.975	0.320895	0.144302	2.22377	0.0261638	0.0865114	2.30507	-2.30507	0.254555	-9.05529	1.36203e-19	2.35806e-18
WBGene00000832	ctn-1	136.159	0.367225	0.223501	1.64306	0.100371	0.241048	1.00607	-1.00607	0.471592	-2.13336	0.0328955	0.05009
WBGene00000833	cts-1	2968.95	-0.427088	0.123277	-3.46447	0.000531276	0.00332248	-0.360211	0.360211	0.148142	2.43152	0.0150355	0.0248768
WBGene00000834	cua-1	674.797	-0.452822	0.131687	-3.43862	0.000584677	0.00361384	0.362572	-0.362572	0.214444	-1.69075	0.090884	0.124171
WBGene00000835	cuc-1	152.301	-0.301752	0.207898	-1.45144	0.146657	0.315322	0.889	-0.889	0.49271	-1.80431	0.0711833	0.0997299
WBGene00000836	cul-1	447.878	-0.484694	0.198512	-2.44163	0.0146209	0.0544166	-0.505813	0.505813	0.328777	1.53847	0.123934	0.163346
WBGene00000837	cul-2	757.701	0.034817	0.207333	0.167928	0.86664	0.933435	-0.808311	0.808311	0.286093	2.82535	0.00472291	0.00882557
WBGene00000838	cul-3	467.795	-0.271707	0.201407	-1.34905	0.177322	0.358679	-1.34218	1.34218	0.285155	4.70682	2.51605e-06	9.30232e-06
WBGene00000839	cul-4	298.193	-0.224963	0.16353	-1.37567	0.168924	0.347452	-0.54336	0.54336	0.343871	1.58013	0.114077	0.15172
WBGene00000840	cul-5	321.28	-0.0533526	0.163259	-0.326798	0.743821	0.861541	-0.442869	0.442869	0.460733	0.961227	0.336438	0.392194
WBGene00000841	cul-6	80.0464	-0.0213475	0.256903	-0.0830954	0.933776	0.968163	1.4389	-1.4389	0.67543	-2.13035	0.0331426	0.0503986
WBGene00000843	cup-2	635.266	-0.212841	0.148491	-1.43336	0.151756	0.321922	-0.715147	0.715147	0.260338	2.74699	0.00601449	0.0109495
WBGene00000845	cup-4	24.9608	-0.195028	0.532116	-0.366513	0.713982	0.843847
WBGene00000846	cup-5	515.506	-0.350255	0.159778	-2.19214	0.0283697	0.0923461	-1.28853	1.28853	0.288544	4.46565	7.98255e-06	2.66152e-05
WBGene00000851	cut-1	10.5229	0.0382934	0.730618	0.0524124	0.9582	0.980239
WBGene00000853	cut-6	20.8382	1.18661	0.409897	2.89489	0.00379294	0.0178148
WBGene00000854	cux-7	427.793	-0.726556	0.166367	-4.36717	1.25865e-05	0.000125194	-1.30845	1.30845	0.358981	3.64489	0.000267505	0.000661405
WBGene00000857	cwn-1	81.1391	0.609843	0.281741	2.16455	0.030422	0.0978287
WBGene00000858	cwn-2	18.3831	0.0818802	0.452712	0.180866	0.856473	0.928256
WBGene00000859	cwp-1	21.3491	0.0800762	0.480405	0.166685	0.867618	0.933778
WBGene00000861	cwp-3	26.4757	0.407045	0.386958	1.05191	0.292841	0.500518
WBGene00000862	cwp-4	45.3105	0.22393	0.312196	0.717274	0.473205	0.67128
WBGene00000863	cya-1	303.797	-0.0991417	0.189515	-0.523135	0.60088	0.769176	-2.09077	2.09077	0.456174	4.58327	4.57771e-06	1.60048e-05
WBGene00000864	cya-2	79.6479	-0.324411	0.259404	-1.2506	0.21108	0.40446
WBGene00000865	cyb-1	1539.27	-0.265464	0.155751	-1.70441	0.0883039	0.219744	-2.05636	2.05636	0.214218	9.59937	8.04336e-22	1.69704e-20
WBGene00000866	cyb-2.1	1044.17	-0.204157	0.136617	-1.49438	0.135077	0.29743	-2.91983	2.91983	0.345613	8.44825	2.95695e-17	4.21539e-16
WBGene00000867	cyb-2.2	1566.62	-0.20856	0.136308	-1.53006	0.126001	0.282425	-2.70747	2.70747	0.254562	10.6358	2.03038e-26	5.8629e-25
WBGene00000868	cyb-3	4465.99	-0.294876	0.126674	-2.32783	0.019921	0.0696691	-2.64336	2.64336	0.423296	6.24471	4.24579e-10	2.83243e-09
WBGene00000869	cyc-1	844.829	-0.711444	0.105855	-6.72089	1.80613e-11	5.37062e-10	0.00731355	-0.00731355	0.21556	-0.0339282	0.972934	0.97763
WBGene00000870	cyd-1	45.5866	1.55385	0.311713	4.98487	6.20042e-07	8.25055e-06
WBGene00000871	cye-1	385.447	-0.288965	0.186613	-1.54847	0.121509	0.275742	-2.27219	2.27219	0.412188	5.5125	3.5378e-08	1.75823e-07
WBGene00000872	cyk-1	352.494	0.101988	0.157631	0.647004	0.51763	0.706498	0.74603	-0.74603	0.316829	-2.35467	0.018539	0.0299898
WBGene00000874	cyk-3	521.16	-0.310415	0.149534	-2.07588	0.0379052	0.116487	-0.598742	0.598742	0.258749	2.31399	0.0206683	0.0330291
WBGene00000875	cyk-4	1024.16	-0.591541	0.178877	-3.30696	0.000943139	0.00543016	-2.39076	2.39076	0.278822	8.57447	9.95433e-18	1.47212e-16
WBGene00000876	cyl-1	429.936	-0.616616	0.13772	-4.47733	7.5583e-06	7.966e-05	-1.07301	1.07301	0.364242	2.94586	0.0032206	0.00623474
WBGene00000877	cyn-1	419.601	-1.26543	0.133358	-9.48901	2.33248e-21	1.81666e-19	-0.630308	0.630308	0.277896	2.26814	0.0233205	0.0367627
WBGene00000878	cyn-2	24.9497	0.419213	0.429856	0.97524	0.329441	0.53914
WBGene00000879	cyn-3	1051.98	-0.647722	0.117117	-5.53056	3.19217e-08	5.36632e-07	-0.174753	0.174753	0.195213	0.895188	0.370687	0.42747
WBGene00000880	cyn-4	334.937	-0.783251	0.188114	-4.1637	3.13135e-05	0.000280566	0.0936746	-0.0936746	0.383142	-0.24449	0.806851	0.836124
WBGene00000881	cyn-5	1838.75	0.0431317	0.109595	0.393555	0.69391	0.830947	1.44128	-1.44128	0.144555	-9.97049	2.05215e-23	4.80373e-22
WBGene00000882	cyn-6	93.6206	0.106155	0.255054	0.416207	0.677258	0.820971	2.31032	-2.31032	0.483788	-4.77547	1.79286e-06	6.77741e-06
WBGene00000883	cyn-7	4726.14	-0.468611	0.116847	-4.01047	6.05983e-05	0.000505602	0.266776	-0.266776	0.12522	-2.13047	0.0331332	0.0503941
WBGene00000884	cyn-8	155.457	-0.0652145	0.183415	-0.355558	0.722172	0.849395	-0.415392	0.415392	0.534247	0.777529	0.436847	0.493128
WBGene00000885	cyn-9	247.508	-0.945424	0.147078	-6.42803	1.29268e-10	3.39233e-09	-1.41713	1.41713	0.5247	2.70083	0.00691668	0.0123873
WBGene00000886	cyn-10	324.595	-0.2477	0.161309	-1.53556	0.124646	0.280685	-3.08129	3.08129	0.512012	6.01799	1.76591e-09	1.07974e-08
WBGene00000887	cyn-11	246.431	-0.491794	0.154197	-3.18939	0.00142572	0.00774884	-1.00262	1.00262	0.404715	2.47736	0.0132359	0.0221401
WBGene00000888	cyn-12	407.992	-0.231361	0.161337	-1.43402	0.151565	0.321678	-1.26608	1.26608	0.35236	3.59316	0.000326697	0.000792406
WBGene00000889	cyn-13	712.009	-0.812194	0.118276	-6.86691	6.56055e-12	2.07048e-10	-0.986034	0.986034	0.271607	3.63037	0.000283013	0.000694971
WBGene00000890	sig-7	381.037	-0.653172	0.132488	-4.93005	8.22071e-07	1.05902e-05	-1.62256	1.62256	0.34884	4.6513	3.29855e-06	1.19115e-05
WBGene00000891	cyn-15	338.156	-0.658697	0.149419	-4.40838	1.04145e-05	0.000105743	-0.611909	0.611909	0.370722	1.65059	0.0988226	0.133633
WBGene00000892	cyn-16	163.861	-0.543709	0.198137	-2.74411	0.00606756	0.02647	-1.08973	1.08973	0.586861	1.85689	0.0633274	0.089745
WBGene00000893	cyn-17	14.244	0.421284	0.713078	0.590797	0.554656	0.732481
WBGene00000894	dab-1	905.095	-0.104387	0.204979	-0.509254	0.610574	0.77562	-0.730044	0.730044	0.213839	3.41399	0.000640195	0.00145804
WBGene00000895	dac-1	28.2283	-0.435026	0.436043	-0.997667	0.318441	0.527339
WBGene00000896	dad-1	563.279	-0.309357	0.128818	-2.40149	0.0163283	0.0592896	-0.00551222	0.00551222	0.275748	0.01999	0.984051	0.987296
WBGene00000897	daf-1	106.533	0.613329	0.289889	2.11574	0.0343672	0.107641	0.0697898	-0.0697898	0.551246	-0.126604	0.899254	0.914629
WBGene00000898	daf-2	469.53	0.0815555	0.191281	0.426365	0.669842	0.816457	-0.552206	0.552206	0.337104	1.63809	0.101404	0.136679
WBGene00000899	daf-3	181.027	0.219816	0.226953	0.96855	0.33277	0.542496	0.376849	-0.376849	0.512616	-0.73515	0.462248	0.516788
WBGene00000900	daf-4	168.886	0.112645	0.203984	0.552224	0.580795	0.753627	-0.0336198	0.0336198	0.535379	0.0627963	0.949929	0.958653
WBGene00000901	daf-5	125.21	0.144494	0.305299	0.473288	0.636008	0.795314	0.564415	-0.564415	0.496372	-1.13708	0.255504	0.309105
WBGene00000902	daf-6	24.7628	0.428132	0.524782	0.815828	0.414599	0.620034
WBGene00000903	daf-7	63.079	-0.179625	0.307468	-0.584208	0.55908	0.736376
WBGene00000904	daf-8	40.606	0.227058	0.377285	0.601821	0.547293	0.728709
WBGene00000905	daf-9	46.2819	0.312095	0.382591	0.815742	0.414648	0.620034
WBGene00000906	daf-10	46.1818	0.303311	0.316167	0.959336	0.337389	0.547347
WBGene00000907	daf-11	36.9376	0.416232	0.451	0.922908	0.356055	0.567042
WBGene00000908	daf-12	149.429	0.300131	0.207871	1.44383	0.148787	0.317967	0.493628	-0.493628	0.493218	-1.00083	0.316908	0.372291
WBGene00000910	daf-14	86.8154	0.420138	0.215402	1.95049	0.0511181	0.146339	1.72833	-1.72833	0.63469	-2.7231	0.0064672	0.011669
WBGene00000911	daf-15	1297.47	-0.624107	0.140248	-4.45004	8.58539e-06	8.90479e-05	-0.811952	0.811952	0.217905	3.72618	0.000194407	0.000494105
WBGene00000912	daf-16	571.662	-0.556464	0.169859	-3.27603	0.00105277	0.00596032	0.563457	-0.563457	0.210469	-2.67715	0.00742524	0.0132108
WBGene00000913	daf-18	2032.32	-0.47159	0.154542	-3.05154	0.00227672	0.0115773	-2.28936	2.28936	0.265664	8.61748	6.84445e-18	1.02369e-16
WBGene00000914	daf-19	148.302	0.00649471	0.264603	0.0245451	0.980418	0.989921
WBGene00000915	hsp-90	12935.4	-0.728705	0.080726	-9.0269	1.76609e-19	1.17135e-17	-0.71953	0.71953	0.107767	6.67669	2.44401e-11	1.91455e-10
WBGene00000917	daf-25	174.645	-0.897452	0.163272	-5.49666	3.87041e-08	6.40504e-07	-0.654424	0.654424	0.508166	1.28782	0.19781	0.246857
WBGene00000920	daf-28	34.4798	-0.35752	0.359993	-0.99313	0.320646	0.5297
WBGene00000923	daf-31	672.414	-0.818986	0.14823	-5.52511	3.29271e-08	5.51894e-07	-0.987591	0.987591	0.289762	3.40828	0.000653746	0.00148548
WBGene00000928	dao-2	43.8018	2.54708	0.396639	6.42166	1.34794e-10	3.50486e-09
WBGene00000929	dao-3	200.275	-0.296665	0.183868	-1.61347	0.106643	0.251695	1.13859	-1.13859	0.391568	-2.90777	0.0036402	0.00696693
WBGene00000930	dao-4	7.0322	1.42424	0.747742	1.90472	0.0568165	1
WBGene00000931	dao-5	1019.97	-0.265497	0.132849	-1.99848	0.0456644	0.13428	0.15122	-0.15122	0.198924	-0.76019	0.447141	0.502522
WBGene00000932	dao-6	15.6994	1.60385	0.603026	2.65967	0.00782177	0.0325744
WBGene00000933	dap-3	342.315	-0.864045	0.144987	-5.95946	2.53066e-09	5.19566e-08	-0.707148	0.707148	0.322148	2.1951	0.0281563	0.0435358
WBGene00000934	dat-1	35.7119	0.364425	0.355683	1.02458	0.305562	0.513932
WBGene00000935	daz-1	916.869	-0.603629	0.203935	-2.9599	0.00307737	0.0149672	-2.39696	2.39696	0.327984	7.30817	2.70798e-13	2.66156e-12
WBGene00000936	dbl-1	41.0359	0.0165785	0.345523	0.047981	0.961731	0.981619
WBGene00000937	dbr-1	322.128	-0.659784	0.157123	-4.19915	2.67924e-05	0.000243788	-1.50252	1.50252	0.444173	3.38275	0.000717641	0.0016149
WBGene00000938	dcp-66	368.746	-0.138633	0.127134	-1.09045	0.275515	0.481968	-1.00598	1.00598	0.344247	2.92226	0.00347499	0.00667657
WBGene00000939	dcr-1	669.588	-0.304022	0.138397	-2.19675	0.0280385	0.0914908	-0.942056	0.942056	0.293194	3.21308	0.00131318	0.00277434
WBGene00000940	dcs-1	189.405	-0.592645	0.172828	-3.42911	0.000605558	0.00372393	-1.39309	1.39309	0.691958	2.01326	0.0440869	0.0649442
WBGene00000941	ddp-1	201.386	-1.08232	0.184842	-5.85535	4.76002e-09	9.44164e-08	-0.105117	0.105117	0.387871	0.271012	0.786382	0.817804
WBGene00000942	deb-1	263.29	-0.256988	0.208993	-1.22965	0.218829	0.414259	1.27747	-1.27747	0.325799	-3.92105	8.81627e-05	0.000240698
WBGene00000950	deg-1	50.8067	0.395355	0.280349	1.41023	0.158473	0.332474
WBGene00000951	deg-3	142.025	-0.175625	0.261832	-0.670757	0.502375	0.694442
WBGene00000952	del-1	83.6115	0.174307	0.318966	0.546476	0.584739	0.75621
WBGene00000953	del-2	23.0695	0.244116	0.415849	0.587031	0.557183	0.734846
WBGene00000955	des-2	49.3237	0.170828	0.352078	0.4852	0.627535	0.789838
WBGene00000958	dgk-1	67.4772	0.0212467	0.300331	0.0707441	0.943601	0.97365
WBGene00000959	dgk-2	210.008	0.613622	0.167539	3.66257	0.000249701	0.00172855	0.993119	-0.993119	0.39226	-2.53179	0.0113482	0.0193257
WBGene00000960	dgk-3	33.2314	-0.102692	0.430882	-0.238329	0.811626	0.902605
WBGene00000961	dgn-1	297.963	0.745158	0.207903	3.58416	0.000338162	0.00225733	0.922708	-0.922708	0.273656	-3.37178	0.000746845	0.00167232
WBGene00000962	dhc-1	1849.02	-0.287808	0.130566	-2.20431	0.0275023	0.0900429	0.341269	-0.341269	0.147321	-2.3165	0.0205311	0.032843
WBGene00000963	dhp-1	99.3264	0.203997	0.251296	0.811782	0.416917	0.62218	1.23361	-1.23361	0.563526	-2.1891	0.0285897	0.0441324
WBGene00000964	dhp-2	93.7823	-0.792863	0.231034	-3.4318	0.000599586	0.00369523	2.61835	-2.61835	0.623942	-4.19646	2.71122e-05	8.19373e-05
WBGene00000965	dhs-1	330.586	-0.485437	0.142802	-3.39936	0.000675441	0.0040798	-1.66007	1.66007	0.389172	4.26565	1.99325e-05	6.1967e-05
WBGene00000966	dhs-2	89.7664	0.0892386	0.369257	0.241671	0.809035	0.900761	5.06199	-5.06199	0.547752	-9.24138	2.43333e-20	4.57305e-19
WBGene00000967	dhs-3	506.268	-0.284344	0.169596	-1.67659	0.0936222	0.229117	3.05502	-3.05502	0.21147	-14.4466	2.63348e-47	2.14805e-45
WBGene00000968	dhs-4	51.3768	-0.153866	0.290468	-0.529718	0.596307	0.765689
WBGene00000969	dhs-5	101.364	0.79874	0.220515	3.62215	0.00029216	0.00198901	0.618497	-0.618497	0.512118	-1.20772	0.227154	0.278599
WBGene00000970	dhs-6	339.513	-0.674892	0.128102	-5.2684	1.37618e-07	2.0975e-06	-0.405838	0.405838	0.312389	1.29914	0.193895	0.242621
WBGene00000971	dhs-7	60.9454	-0.985193	0.301367	-3.26908	0.00107898	0.00609248	1.59744	-1.59744	0.549397	-2.90763	0.00364179	0.00696722
WBGene00000972	dhs-8	59.2128	0.627732	0.26294	2.38736	0.01697	0.0613182
WBGene00000973	dhs-9	169.441	0.428292	0.237785	1.80117	0.0716758	0.1883	0.591236	-0.591236	0.504152	-1.17273	0.240903	0.293686
WBGene00000974	dhs-11	227.356	-0.653942	0.163194	-4.00714	6.14578e-05	0.000511516	-1.11611	1.11611	0.394159	2.83163	0.00463114	0.00868079
WBGene00000975	dhs-12	433.391	-0.527748	0.143201	-3.68536	0.000228378	0.00160498	0.71154	-0.71154	0.316538	-2.24788	0.0245838	0.0385697
WBGene00000976	dhs-13	331.608	-0.203607	0.133532	-1.52479	0.127312	0.284635	-0.935799	0.935799	0.338573	2.76395	0.00571066	0.0104493
WBGene00000977	dhs-14	195.882	-0.380852	0.226674	-1.68018	0.0929232	0.228031	3.49313	-3.49313	0.352211	-9.91771	3.48655e-23	8.06596e-22
WBGene00000978	dhs-15	17.6945	0.277077	0.482131	0.574693	0.565499	0.741953
WBGene00000979	dhs-16	26.5563	1.18961	0.439312	2.7079	0.00677105	0.0288713
WBGene00000980	dhs-17	180.106	-0.869258	0.190132	-4.57186	4.83409e-06	5.32283e-05	-1.48265	1.48265	0.523793	2.83059	0.00464617	0.00870071
WBGene00000981	dhs-18	246.72	0.378791	0.195787	1.93471	0.0530257	0.150657	2.83947	-2.83947	0.325814	-8.71502	2.90711e-18	4.49239e-17
WBGene00000982	dhs-19	175.058	-0.00391489	0.232103	-0.016867	0.986543	0.993148	4.63614	-4.63614	0.298935	-15.5089	3.022e-54	3.46523e-52
WBGene00000983	dhs-20	116.271	0.399982	0.230945	1.73193	0.0832856	0.210245	4.32146	-4.32146	0.501953	-8.6093	7.35059e-18	1.09525e-16
WBGene00000984	dhs-21	238.483	-0.101371	0.174321	-0.581519	0.560891	0.737932	2.38436	-2.38436	0.243345	-9.79828	1.14516e-22	2.52383e-21
WBGene00000985	dhs-22	1164.11	-0.158384	0.114936	-1.37802	0.168198	0.346288	0.301322	-0.301322	0.204323	-1.47473	0.140286	0.182166
WBGene00000986	dhs-23	33.3815	-0.313595	0.376131	-0.833739	0.404428	0.611591	2.50524	-2.50524	0.63265	-3.95991	7.49771e-05	0.00020771
WBGene00000987	dhs-24	79.1695	-0.924454	0.282936	-3.26736	0.00108556	0.00612149
WBGene00000988	dhs-25	328.92	-0.0916549	0.26829	-0.341626	0.732632	0.855347	3.0181	-3.0181	0.33257	-9.07507	1.13605e-19	1.9886e-18
WBGene00000989	dhs-26	112.434	-0.780847	0.921786	-0.847102	0.396938	0.604558	8.80418	-8.80418	0.575468	-15.2992	7.74529e-53	7.8565e-51
WBGene00000990	dhs-27	43.3288	0.818837	0.320971	2.55113	0.0107375	0.0423687
WBGene00000991	dhs-28	982.7	-0.349848	0.146398	-2.38971	0.0168617	0.0609786	2.193	-2.193	0.209788	-10.4534	1.41339e-25	3.86946e-24
WBGene00000992	dhs-29	44.9258	0.132172	0.319043	0.414278	0.67867	0.821838
WBGene00000993	dhs-30	126.89	-0.222341	0.234096	-0.949783	0.342222	0.552304	1.20426	-1.20426	0.448231	-2.6867	0.0072162	0.0128765
WBGene00000994	dic-1	146.615	-0.460271	0.251802	-1.82791	0.0675635	0.180314
WBGene00000995	die-1	196.777	0.120022	0.178898	0.670895	0.502287	0.694433	-0.46305	0.46305	0.558503	0.829091	0.407053	0.46353
WBGene00000996	dif-1	401.907	-0.256134	0.140631	-1.82132	0.0685588	0.182272	-0.137435	0.137435	0.321569	0.42739	0.669096	0.712501
WBGene00000998	dig-1	702.525	0.0823238	0.19241	0.427857	0.668756	0.815718	1.23083	-1.23083	0.22489	-5.47305	4.42362e-08	2.1712e-07
WBGene00001000	dim-1	813.319	-1.56793	0.123146	-12.7323	3.91309e-37	1.02216e-34	1.17779	-1.17779	0.235425	-5.00283	5.64944e-07	2.33534e-06
WBGene00001001	dis-3	556.103	-0.658926	0.15058	-4.37591	1.20928e-05	0.00012085	-0.55404	0.55404	0.308322	1.79695	0.0723433	0.101104
WBGene00001002	div-1	448.467	-0.288723	0.262085	-1.10164	0.270618	0.477137	-2.62605	2.62605	0.362883	7.23664	4.59945e-13	4.43251e-12
WBGene00001005	dlc-1	1576.05	-0.637597	0.105649	-6.03507	1.58895e-09	3.39355e-08	-0.387898	0.387898	0.203844	1.90292	0.057051	0.0817138
WBGene00001006	dlg-1	137.93	0.134748	0.227865	0.591352	0.554284	0.732275	1.65218	-1.65218	0.511275	-3.2315	0.00123144	0.00262266
WBGene00001007	dli-1	570.83	-0.918309	0.194407	-4.72365	2.31651e-06	2.72006e-05	-0.311433	0.311433	0.218809	1.42331	0.154647	0.19847
WBGene00001008	dlk-1	332.028	0.659636	0.176407	3.73929	0.000184541	0.00133049	0.647875	-0.647875	0.422923	-1.5319	0.125547	0.16528
WBGene00001016	dna-2	668.116	-0.437563	0.145769	-3.00176	0.00268426	0.0133497	-2.2243	2.2243	0.343046	6.48398	8.93341e-11	6.40228e-10
WBGene00001017	dnc-1	872.924	-0.236784	0.149138	-1.58768	0.112358	0.260746	0.257745	-0.257745	0.210807	-1.22266	0.221457	0.272288
WBGene00001018	dnc-2	548.115	-0.729464	0.12723	-5.73342	9.84241e-09	1.83239e-07	-1.01546	1.01546	0.334345	3.03717	0.00238814	0.00477635
WBGene00001019	dnj-1	354.346	-0.672681	0.148276	-4.53667	5.71495e-06	6.20026e-05	-0.692987	0.692987	0.301427	2.29902	0.021504	0.0342127
WBGene00001020	dnj-2	202.883	-0.0396878	0.209621	-0.189331	0.849833	0.92389	-0.44537	0.44537	0.395406	1.12636	0.260013	0.314128
WBGene00001021	dnj-3	92.4349	-0.774223	0.224018	-3.45608	0.000548101	0.00341387
WBGene00001022	dnj-4	131.843	-0.602659	0.238728	-2.52446	0.0115876	0.0452026	-0.805333	0.805333	0.552128	1.4586	0.144676	0.187222
WBGene00001023	dnj-5	2006.89	-0.357828	0.140996	-2.53786	0.0111532	0.0437648	-2.04698	2.04698	0.225667	9.07078	1.18171e-19	2.05939e-18
WBGene00001025	dnj-7	183.782	1.0185	0.187463	5.43303	5.54038e-08	8.94203e-07	1.74227	-1.74227	0.45475	-3.83126	0.000127487	0.00033769
WBGene00001026	dnj-8	476.413	-0.12546	0.20045	-0.62589	0.531387	0.717032	-1.13204	1.13204	0.317495	3.56555	0.000363093	0.000871335
WBGene00001027	dnj-9	217.592	-0.450509	0.157986	-2.85158	0.00435021	0.0199844	-0.783318	0.783318	0.397346	1.97137	0.0486811	0.0709851
WBGene00001028	dnj-10	318.329	-0.712767	0.172419	-4.13394	3.56604e-05	0.000315682	-0.272408	0.272408	0.417147	0.653028	0.513738	0.566193
WBGene00001029	dnj-11	1282.5	-1.08008	0.155302	-6.95471	3.53285e-12	1.15133e-10	-0.999451	0.999451	0.239412	4.1746	2.98505e-05	8.9699e-05
WBGene00001030	dnj-12	1367.45	-0.172217	0.100406	-1.7152	0.0863078	0.216171	-0.758298	0.758298	0.240581	3.15195	0.00162183	0.00334948
WBGene00001031	dnj-13	726.576	-0.461998	0.117016	-3.94816	7.87537e-05	0.00063966	-0.901813	0.901813	0.271425	3.32251	0.000892129	0.00196616
WBGene00001032	dnj-14	136.476	0.351546	0.198258	1.77318	0.0761988	0.196862	1.2045	-1.2045	0.534925	-2.25171	0.0243407	0.0382338
WBGene00001033	dnj-15	235.327	-0.590543	0.150049	-3.93567	8.29655e-05	0.000669203	-1.26528	1.26528	0.492246	2.57043	0.0101572	0.0175313
WBGene00001034	dnj-16	430.654	-0.0924698	0.220757	-0.418877	0.675306	0.819946	-0.52757	0.52757	0.321045	1.64329	0.100323	0.135476
WBGene00001035	dnj-17	409.952	-0.999563	0.138704	-7.20646	5.74259e-13	2.09685e-11	-1.10238	1.10238	0.396133	2.78286	0.00538825	0.00991438
WBGene00001036	dnj-18	306.928	-0.317619	0.13662	-2.32484	0.0200807	0.0700908	-1.71426	1.71426	0.517846	3.31036	0.000931756	0.00203986
WBGene00001037	dnj-19	1280.32	-0.365828	0.112992	-3.23765	0.00120517	0.00669257	-1.25181	1.25181	0.246845	5.07123	3.95243e-07	1.68762e-06
WBGene00001038	dnj-20	752.486	-0.286077	0.117001	-2.44508	0.014482	0.0540892	1.02769	-1.02769	0.217229	-4.7309	2.23523e-06	8.33028e-06
WBGene00001039	dnj-21	143.726	-0.574184	0.222708	-2.57819	0.00993191	0.0398097	-0.660292	0.660292	0.574623	1.14909	0.25052	0.303819
WBGene00001040	dnj-22	633.09	-1.43706	0.168452	-8.53102	1.45059e-17	8.79627e-16	-2.433	2.433	0.38427	6.33148	2.42826e-10	1.66774e-09
WBGene00001041	dnj-23	559.587	-0.312614	0.121558	-2.57172	0.0101195	0.0404185	-1.83799	1.83799	0.312227	5.88671	3.93965e-09	2.28021e-08
WBGene00001042	dnj-24	39.8013	-0.328984	0.363775	-0.904361	0.365804	0.57716
WBGene00001043	dnj-25	225.02	-0.62501	0.267068	-2.34027	0.0192699	0.0678946	-0.316551	0.316551	0.418385	0.756604	0.449287	0.504221
WBGene00001044	dnj-26	156.631	-0.586403	0.196212	-2.98862	0.00280242	0.01382	-3.0639	3.0639	0.740866	4.13556	3.54084e-05	0.000104495
WBGene00001045	dnj-27	221.142	0.80202	0.188634	4.25172	2.12135e-05	0.000199217	0.310588	-0.310588	0.460491	-0.674471	0.500012	0.552759
WBGene00001046	dnj-28	154.55	-0.575739	0.286842	-2.00716	0.0447325	0.132319
WBGene00001047	dnj-29	749.079	-0.307865	0.125551	-2.45211	0.0142021	0.0532782	-0.604124	0.604124	0.27757	2.17647	0.0295199	0.0454576
WBGene00001048	dnj-30	283.284	-0.729364	0.149631	-4.8744	1.09138e-06	1.36649e-05	-1.36138	1.36138	0.543826	2.50333	0.0123031	0.0207641
WBGene00001049	dog-1	350.591	0.0119456	0.176449	0.0677003	0.946024	0.974393	-1.41484	1.41484	0.418669	3.37939	0.000726467	0.00163336
WBGene00001050	dom-3	115.383	-0.560172	0.23944	-2.33951	0.019309	0.0679617	-1.13924	1.13924	0.689343	1.65264	0.0984037	0.133134
WBGene00001051	cks-1	690.253	-0.417543	0.111473	-3.74569	0.000179898	0.00130089	-2.40127	2.40127	0.296265	8.10512	5.26915e-16	6.69174e-15
WBGene00001052	dop-1	60.7312	-1.11787	0.294289	-3.79855	0.000145545	0.00107913
WBGene00001053	dop-2	44.9336	0.133663	0.398344	0.335548	0.737212	0.858101
WBGene00001054	dpf-1	75.6662	0.236438	0.323006	0.731992	0.464174	0.663122
WBGene00001055	dpf-2	334.824	-0.161353	0.132077	-1.22165	0.221839	0.418325	0.946015	-0.946015	0.287095	-3.29513	0.000983761	0.00214599
WBGene00001056	dpf-3	965.709	-0.0728571	0.203655	-0.357748	0.720532	0.848458	-0.817186	0.817186	0.215794	3.78689	0.000152546	0.000398065
WBGene00001057	dpf-4	612.639	-0.70311	0.127825	-5.50055	3.786e-08	6.27759e-07	-0.606556	0.606556	0.286937	2.1139	0.034524	0.0522383
WBGene00001058	dpf-5	969.658	-0.242494	0.181547	-1.33571	0.181644	0.364339	-0.385822	0.385822	0.205275	1.87954	0.060171	0.0857635
WBGene00001059	dpf-6	67.0218	0.388936	0.284583	1.36669	0.171724	0.351288
WBGene00001060	dpf-7	255.117	-0.0303334	0.223719	-0.135587	0.892148	0.945296	-1.18342	1.18342	0.526395	2.24815	0.0245667	0.0385505
WBGene00001061	dpl-1	432.304	-0.371521	0.152907	-2.42972	0.0151105	0.0557499	-1.66499	1.66499	0.439858	3.78528	0.000153534	0.000399988
WBGene00001062	dpr-1	10.6823	1.40174	0.671026	2.08895	0.0367123	0.113644
WBGene00001063	dpy-1	160.444	1.3399	0.25937	5.166	2.39157e-07	3.43626e-06
WBGene00001064	dpy-2	11.6646	0.135843	0.676448	0.200818	0.840841	0.918171
WBGene00001065	dpy-3	15.0453	-0.45284	0.763549	-0.593072	0.553133	0.731778
WBGene00001066	dpy-4	9.52144	-0.876421	0.654813	-1.33843	0.180757	0.363247
WBGene00001068	dpy-6	131.973	0.360624	0.216116	1.66866	0.0951849	0.231892	1.38581	-1.38581	0.696296	-1.99026	0.0465622	0.0681969
WBGene00001069	dpy-7	65.4005	-0.971588	0.807093	-1.20381	0.228662	0.42687
WBGene00001070	dpy-8	11.9872	-0.614572	0.637099	-0.964642	0.334724	0.5446
WBGene00001071	dpy-9	21.4073	1.51872	0.446706	3.39982	0.000674303	0.00407437
WBGene00001072	dpy-10	14.9786	-2.53765	0.571391	-4.44119	8.94648e-06	9.22297e-05
WBGene00001073	dpy-11	679.244	0.00805883	0.120844	0.0666876	0.94683	0.974597	0.0213894	-0.0213894	0.222765	-0.0960176	0.923507	0.935328
WBGene00001075	dpy-14	10.7504	1.7533	0.621762	2.81989	0.00480407	0.0218155
WBGene00001076	dpy-17	54.7958	-0.249283	0.299537	-0.832226	0.405282	0.612322
WBGene00001077	dpy-18	154.833	1.03936	0.196994	5.2761	1.31961e-07	2.016e-06	1.47536	-1.47536	0.425223	-3.46961	0.000521209	0.00121004
WBGene00001078	dpy-19	76.0351	0.430107	0.279117	1.54095	0.123328	0.278419
WBGene00001079	dpy-20	16.013	0.404761	0.526332	0.769022	0.44188	0.644021
WBGene00001080	dpy-21	269.799	0.378459	0.188467	2.00809	0.0446335	0.132142	0.189131	-0.189131	0.40562	-0.466277	0.641017	0.686863
WBGene00001081	dpy-22	796.84	0.0269969	0.14319	0.188539	0.850454	0.924328	1.04665	-1.04665	0.219327	-4.77211	1.82307e-06	6.88503e-06
WBGene00001082	dpy-23	72.8622	0.25198	0.249604	1.00952	0.312727	0.521073	0.868334	-0.868334	0.553147	-1.56981	0.11646	0.154474
WBGene00001085	dpy-26	520.58	-0.219733	0.17546	-1.25233	0.21045	0.403801	-1.58932	1.58932	0.403844	3.93547	8.30354e-05	0.0002278
WBGene00001086	dpy-27	305.846	0.60448	0.199586	3.02868	0.00245628	0.0123661	0.917025	-0.917025	0.552358	-1.6602	0.0968742	0.131402
WBGene00001087	dpy-28	342.705	-0.111704	0.237752	-0.469832	0.638475	0.797342	-1.65413	1.65413	0.430563	3.84178	0.000122143	0.000324512
WBGene00001088	dpy-30	788.714	-0.446987	0.13501	-3.31077	0.000930386	0.00537131	-0.553681	0.553681	0.356953	1.55113	0.120871	0.159787
WBGene00001089	dre-1	175.064	-0.168703	0.192564	-0.876086	0.380984	0.591237	1.18546	-1.18546	0.465814	-2.54493	0.0109301	0.0187103
WBGene00001090	drh-1	181.865	-0.0721012	0.216614	-0.332856	0.739243	0.859405	0.175828	-0.175828	0.478621	-0.367363	0.713348	0.752134
WBGene00001091	drh-2	183.407	0.385846	0.185154	2.08391	0.0371679	0.114824	1.55057	-1.55057	0.440775	-3.51782	0.000435113	0.00102581
WBGene00001092	dro-1	78.7702	-1.42732	0.2621	-5.44569	5.1604e-08	8.40062e-07
WBGene00001093	drp-1	740.984	-0.330605	0.167941	-1.96858	0.0490008	0.141759	-1.20426	1.20426	0.283649	4.24559	2.18016e-05	6.71551e-05
WBGene00001094	dars-1	1055.1	-0.337104	0.139842	-2.41061	0.0159257	0.0581634	-0.0624152	0.0624152	0.187738	0.332459	0.739543	0.775412
WBGene00001095	dars-2	107.579	-0.487276	0.234483	-2.07808	0.0377016	0.116009	0.669181	-0.669181	0.651972	-1.0264	0.304705	0.359986
WBGene00001099	dsc-4	373.713	0.0681182	0.153818	0.442851	0.657874	0.809876	2.16124	-2.16124	0.234985	-9.19738	3.66791e-20	6.74896e-19
WBGene00001101	dsh-1	189.851	0.18928	0.189836	0.997072	0.318729	0.52742	1.39402	-1.39402	0.472441	-2.95067	0.00317086	0.00615123
WBGene00001102	dsh-2	783.846	-0.153459	0.118319	-1.297	0.194631	0.382704	-1.67508	1.67508	0.340693	4.9167	8.80161e-07	3.51177e-06
WBGene00001103	dsl-1	15.459	-0.0476316	0.542113	-0.0878628	0.929986	0.966295
WBGene00001104	dsl-2	76.1489	-0.141194	0.23705	-0.595628	0.551424	0.730931
WBGene00001105	dsl-3	138.554	2.66221	0.207238	12.8461	9.04583e-38	2.47725e-35
WBGene00001106	dsl-4	41.0226	0.426839	0.386039	1.10569	0.268861	0.475073
WBGene00001108	dsl-6	23.9871	1.18213	0.47018	2.5142	0.0119302	0.0462121
WBGene00001109	dsl-7	31.149	0.699546	0.466352	1.50004	0.133605	0.295338
WBGene00001110	duo-1	123.752	-1.02549	0.238484	-4.30005	1.7076e-05	0.00016394	-0.909085	0.909085	0.628885	1.44555	0.148303	0.191259
WBGene00001111	duo-2	16.0631	0.756836	0.570962	1.32554	0.18499	0.36909
WBGene00001112	duo-3	450.773	-0.303732	0.168573	-1.80178	0.07158	0.188194	-1.52993	1.52993	0.326964	4.67919	2.88005e-06	1.05106e-05
WBGene00001113	dur-1	88.0279	0.304542	0.222911	1.3662	0.171875	0.351513
WBGene00001115	dyb-1	76.7166	0.917178	0.243014	3.77419	0.000160531	0.00117536	-0.196262	0.196262	0.668088	0.293767	0.768936	0.802721
WBGene00001116	dyc-1	70.9444	0.223525	0.26261	0.851168	0.394676	0.602621
WBGene00001117	dyf-1	51.19	0.471937	0.365149	1.29245	0.196202	0.384452
WBGene00001118	dyf-2	138.821	0.194383	0.314741	0.617597	0.536841	0.72067	0.844055	-0.844055	0.813492	-1.03757	0.29947	0.354755
WBGene00001119	dyf-3	41.9116	-1.21374	0.447821	-2.71033	0.00672172	0.0287332	0.0407628	-0.0407628	1.00611	-0.0405153	0.967682	0.973741
WBGene00001121	dyf-5	12.1232	-0.0323275	0.679574	-0.0475703	0.962059	0.981776
WBGene00001122	dyf-6	27.5559	0.50193	0.421575	1.19061	0.233808	0.433434
WBGene00001123	dyf-7	16.3185	-0.751045	0.620094	-1.21118	0.225827	0.423494
WBGene00001127	dyf-11	16.0229	1.20876	0.604495	1.99963	0.0455407	0.134056
WBGene00001129	dyf-13	15.3143	-1.2899	0.56675	-2.27596	0.0228482	0.0775568
WBGene00001130	dyn-1	235.171	0.351984	0.226493	1.55406	0.120169	0.273506	0.64811	-0.64811	0.355456	-1.82332	0.0682553	0.0960235
WBGene00001131	dys-1	382.23	0.170853	0.211424	0.808109	0.419028	0.623985	0.91359	-0.91359	0.337434	-2.70746	0.00678	0.0121723
WBGene00001132	alp-1	372.955	-0.426757	0.148881	-2.86643	0.00415134	0.0192321	2.14173	-2.14173	0.263048	-8.14195	3.8895e-16	5.00386e-15
WBGene00001133	eat-2	62.5282	0.507612	0.346824	1.4636	0.143302	0.310072
WBGene00001134	eat-3	414.823	-0.278907	0.175042	-1.59337	0.111077	0.258745	-0.347965	0.347965	0.32144	1.08252	0.279022	0.333579
WBGene00001135	eat-4	83.3593	0.313662	0.293731	1.06785	0.285587	0.492282
WBGene00001136	eat-5	38.551	0.363521	0.36163	1.00523	0.314787	0.523381
WBGene00001137	eat-6	4289.5	-0.239368	0.120823	-1.98115	0.0475743	0.1386	0.50421	-0.50421	0.130065	-3.87661	0.000105922	0.000285442
WBGene00001145	eat-16	100.497	0.341302	0.218038	1.56533	0.117506	0.269103	1.40443	-1.40443	0.558537	-2.51449	0.0119206	0.0202004
WBGene00001148	eat-20	81.6254	0.101439	0.316701	0.3203	0.748741	0.865233	-0.250999	0.250999	0.677583	0.370433	0.71106	0.750321
WBGene00001149	bcat-1	742.65	-0.50497	0.117981	-4.28011	1.86803e-05	0.000177906	1.50283	-1.50283	0.218026	-6.8929	5.46652e-12	4.56717e-11
WBGene00001150	ech-1.1	37.0298	-0.0104576	0.35919	-0.0291143	0.976773	0.988526	5.28412	-5.28412	0.833137	-6.34244	2.26158e-10	1.55732e-09
WBGene00001151	ech-2	217.945	-0.142061	0.181774	-0.781526	0.434493	0.638119	-0.434162	0.434162	0.512853	0.846562	0.397239	0.453726
WBGene00001152	ech-3	184.952	0.189202	0.185029	1.02255	0.30652	0.514828	1.19257	-1.19257	0.432756	-2.75576	0.00585557	0.0106873
WBGene00001153	ech-4	552.776	-0.228734	0.11733	-1.9495	0.0512362	0.146627	-0.459723	0.459723	0.255944	1.79619	0.0724646	0.101225
WBGene00001154	ech-5	47.147	-0.446134	0.338738	-1.31705	0.187822	0.37316
WBGene00001155	ech-6	1069.88	-0.392953	0.143045	-2.74705	0.00601331	0.0262873	0.434831	-0.434831	0.199822	-2.17609	0.0295488	0.0454933
WBGene00001156	ech-7	186.335	-1.45632	0.194318	-7.49453	6.65377e-14	2.76898e-12	0.77041	-0.77041	0.588242	-1.30968	0.190304	0.238732
WBGene00001157	ech-8	111.755	0.521264	0.215535	2.41847	0.0155859	0.0571316
WBGene00001158	ech-9	88.2535	1.92992	0.260252	7.4156	1.21077e-13	4.84852e-12
WBGene00001159	eff-1	56.3225	0.683142	0.346854	1.96954	0.0488912	0.141563
WBGene00001160	efk-1	475.858	-0.0914903	0.160493	-0.570059	0.568638	0.744345	-0.429933	0.429933	0.300872	1.42896	0.153017	0.196761
WBGene00001161	efl-1	162.68	-0.349085	0.189204	-1.84502	0.0650347	0.175357	-1.74959	1.74959	0.531645	3.2909	0.00099868	0.00217619
WBGene00001162	efl-2	70.8814	-0.192448	0.278695	-0.690532	0.48986	0.68566
WBGene00001163	efn-2	35.4067	-0.18019	0.350462	-0.514149	0.607148	0.77322
WBGene00001164	efn-3	15.7343	-0.21688	0.471209	-0.460263	0.645327	0.801889
WBGene00001165	efn-4	39.0433	0.00232812	0.324412	0.00717643	0.994274	0.997056
WBGene00001166	eftu-2	1836.47	-0.29806	0.109074	-2.73265	0.00628273	0.0272476	-1.12502	1.12502	0.164345	6.84547	7.62261e-12	6.29542e-11
WBGene00001167	eef-2	33618.2	-0.662296	0.157129	-4.21498	2.49798e-05	0.000229633	0.948982	-0.948982	0.0949269	-9.99698	1.57114e-23	3.72183e-22
WBGene00001168	eef-1A.1	62110.4	-1.05458	0.0854892	-12.3358	5.81278e-35	1.29862e-32	0.537749	-0.537749	0.092669	-5.8029	6.51792e-09	3.66003e-08
WBGene00001169	eef-1A.2	4606.62	0.000168776	0.110712	0.00152446	0.998784	0.999313	1.47594	-1.47594	0.131505	-11.2234	3.12889e-29	1.09539e-27
WBGene00001170	egl-1	40.2476	0.739164	0.301937	2.44808	0.0143621	0.0537359
WBGene00001171	egl-2	113.667	0.224779	0.35209	0.638412	0.523205	0.710396
WBGene00001172	egl-3	373.137	0.000115986	0.187173	0.000619672	0.999506	0.999623	1.05481	-1.05481	0.318384	-3.31302	0.00092295	0.00202226
WBGene00001173	egl-4	840.887	0.0464245	0.217702	0.213248	0.831133	0.91326	0.00251968	-0.00251968	0.193691	-0.0130088	0.989621	0.991501
WBGene00001174	egl-5	9.60047	0.0732331	0.669591	0.10937	0.912909	0.958049
WBGene00001175	egl-6	58.2871	0.900497	0.302626	2.97561	0.00292406	0.0143159
WBGene00001177	egl-8	381.499	0.0111883	0.170558	0.0655983	0.947698	0.974699	0.92518	-0.92518	0.254538	-3.63474	0.000278258	0.000684995
WBGene00001178	egl-9	134.332	0.158276	0.24428	0.647929	0.517031	0.706083	1.23648	-1.23648	0.605066	-2.04354	0.0409987	0.0607911
WBGene00001179	egl-10	21.9058	0.466638	0.461569	1.01098	0.312025	0.520373
WBGene00001182	egl-13	126.162	-0.254755	0.211871	-1.20241	0.229206	0.427563	1.04614	-1.04614	0.394851	-2.64945	0.00806241	0.0142102
WBGene00001184	egl-15	202.365	0.471716	0.248953	1.8948	0.0581186	0.161167	1.09151	-1.09151	0.486493	-2.24362	0.0248566	0.0389207
WBGene00001186	egl-18	143.049	-0.0303495	0.246143	-0.1233	0.901869	0.951401	-3.20215	3.20215	0.759486	4.21621	2.4844e-05	7.56605e-05
WBGene00001187	egl-19	180.298	0.271613	0.193935	1.40054	0.161352	0.33627	0.965304	-0.965304	0.533826	-1.80827	0.0705638	0.0989719
WBGene00001188	egl-20	58.8957	0.16293	0.2846	0.572487	0.566992	0.74305
WBGene00001189	egl-21	728.511	0.0235622	0.146906	0.16039	0.872574	0.936145	1.13104	-1.13104	0.202239	-5.59261	2.23676e-08	1.14545e-07
WBGene00001190	egl-23	41.9752	0.457851	0.337673	1.3559	0.175131	0.355859
WBGene00001193	egl-26	72.045	0.503368	0.28031	1.79575	0.0725337	0.189995
WBGene00001194	egl-27	757.664	-0.473881	0.13133	-3.60831	0.000308195	0.00208314	-0.867496	0.867496	0.261793	3.31367	0.000920786	0.00201864
WBGene00001196	egl-30	597.034	0.291288	0.231667	1.25736	0.208625	0.401432	0.444454	-0.444454	0.254054	-1.74945	0.080214	0.110837
WBGene00001202	egl-36	25.3367	0.0925571	0.422598	0.219019	0.826635	0.91089
WBGene00001204	egl-38	13.7563	0.501882	0.486161	1.03234	0.301915	0.510375
WBGene00001207	egl-43	89.4436	-0.258128	0.352592	-0.732088	0.464115	0.663102
WBGene00001208	egl-44	200.661	-0.051597	0.187578	-0.27507	0.783262	0.885715	1.62141	-1.62141	0.335808	-4.82837	1.37654e-06	5.32575e-06
WBGene00001209	egl-45	1488.65	-0.462947	0.14916	-3.1037	0.0019112	0.00997854	-0.0256698	0.0256698	0.189786	0.135257	0.892409	0.908601
WBGene00001210	egl-46	76.0188	0.0932069	0.298955	0.311776	0.755211	0.869101
WBGene00001211	egl-47	8.64972	0.753181	0.727501	1.0353	0.300529	0.508894
WBGene00001214	ego-1	425.479	-0.114906	0.170868	-0.672483	0.501276	0.693681	-0.788315	0.788315	0.379261	2.07855	0.0376583	0.0564518
WBGene00001215	ego-2	269.687	-0.323842	0.197195	-1.64224	0.10054	0.241385	0.187143	-0.187143	0.390682	-0.479016	0.631927	0.6784
WBGene00001223	ehn-3	20.9942	0.504279	0.516476	0.976385	0.328873	0.538525
WBGene00001224	ehs-1	772.51	-0.471108	0.123486	-3.81507	0.000136144	0.00101787	-1.22303	1.22303	0.25189	4.85541	1.20137e-06	4.68237e-06
WBGene00001225	eif-3.B	1222.15	-0.496647	0.167072	-2.97266	0.00295233	0.0144169	-0.804602	0.804602	0.202283	3.97761	6.96112e-05	0.000194439
WBGene00001226	eif-3.C	947.819	-0.654177	0.158162	-4.13613	3.5321e-05	0.000313167	-0.364518	0.364518	0.235923	1.54507	0.122329	0.1615
WBGene00001227	eif-3.D	1460.51	-1.38079	0.11938	-11.5663	6.10413e-31	1.02616e-28	-0.892524	0.892524	0.191503	4.66062	3.15259e-06	1.14366e-05
WBGene00001228	eif-3.E	274.502	-0.625591	0.188779	-3.31387	0.000920139	0.0053212	0.0146303	-0.0146303	0.370546	-0.039483	0.968505	0.974293
WBGene00001229	eif-3.F	525.906	-0.409615	0.152877	-2.67937	0.00737608	0.0310534	-0.192468	0.192468	0.292266	0.658539	0.510192	0.562679
WBGene00001230	eif-3.G	585.418	-0.872757	0.133683	-6.52853	6.64161e-11	1.81591e-09	-0.356691	0.356691	0.265424	1.34386	0.178995	0.226232
WBGene00001231	eif-3.H	247.61	-0.806504	0.189877	-4.24751	2.16158e-05	0.000202324	0.642015	-0.642015	0.466846	-1.37522	0.169064	0.21464
WBGene00001232	eif-3.I	316.609	-0.982802	0.162695	-6.04076	1.53392e-09	3.29538e-08	-1.05131	1.05131	0.290853	3.61458	0.000300834	0.000735083
WBGene00001233	eif-3.K	520.357	-0.415892	0.151885	-2.73821	0.00617748	0.0268598	0.45388	-0.45388	0.258248	-1.75754	0.078826	0.108976
WBGene00001234	eif-6	945.235	-0.611027	0.134633	-4.53845	5.66704e-06	6.15221e-05	-0.60897	0.60897	0.21216	2.87033	0.00410041	0.00776135
WBGene00001235	elb-1	180.085	-0.540148	0.171357	-3.15218	0.00162058	0.0086637	-0.429133	0.429133	0.491649	0.872844	0.382748	0.439458
WBGene00001236	elc-1	15.5676	-0.0909854	0.476958	-0.190762	0.848712	0.923091
WBGene00001239	elo-1	1860.83	0.0591013	0.113054	0.522771	0.601134	0.769268	0.106463	-0.106463	0.186754	-0.57007	0.56863	0.61825
WBGene00001240	elo-2	364.257	-0.236828	0.166464	-1.4227	0.154823	0.326796	1.80185	-1.80185	0.286423	-6.29085	3.15739e-10	2.14431e-09
WBGene00001241	elo-3	138.114	-0.426435	0.181235	-2.35294	0.0186255	0.066118	0.0324235	-0.0324235	0.3886	-0.0834366	0.933504	0.943763
WBGene00001242	elo-4	33.1955	0.998165	0.352862	2.82877	0.0046727	0.0212987
WBGene00001243	elo-5	1048.74	-0.0477743	0.134598	-0.35494	0.722634	0.849461	2.76947	-2.76947	0.183972	-15.0538	3.26029e-51	3.10788e-49
WBGene00001244	elo-6	520.818	0.221178	0.1834	1.20599	0.227823	0.425779	2.66869	-2.66869	0.270544	-9.86417	5.95235e-23	1.33413e-21
WBGene00001245	elo-7	68.0351	0.0608555	0.286159	0.212663	0.83159	0.913533
WBGene00001246	elo-8	22.3768	2.90454	0.511652	5.6768	1.3724e-08	2.47368e-07
WBGene00001247	elo-9	33.7966	-0.174002	0.39618	-0.439199	0.660518	0.811559
WBGene00001248	elp-1	105.168	-0.13542	0.33571	-0.403383	0.686666	0.827225	1.20781	-1.20781	0.605622	-1.99433	0.0461163	0.0676567
WBGene00001249	elt-1	92.6803	-0.0984898	0.311894	-0.31578	0.75217	0.867396
WBGene00001250	elt-2	182.51	-0.773752	0.197257	-3.92255	8.76159e-05	0.00069809	1.11972	-1.11972	0.405556	-2.76095	0.00576342	0.0105385
WBGene00001251	elt-3	202.238	-0.18781	0.208115	-0.902433	0.366827	0.578304	0.639374	-0.639374	0.405249	-1.57773	0.114627	0.152323
WBGene00001252	elt-4	17.578	-0.209727	0.517536	-0.405241	0.6853	0.826283
WBGene00001253	elt-6	42.5433	0.274774	0.314436	0.873864	0.382192	0.592211
WBGene00001258	emb-4	470.673	-0.0520888	0.179816	-0.289678	0.772062	0.878079	0.114527	-0.114527	0.320334	-0.357522	0.720701	0.758572
WBGene00001259	emb-5	958.603	-0.616954	0.152498	-4.04566	5.21749e-05	0.000441834	-1.10355	1.10355	0.24098	4.57941	4.66295e-06	1.62812e-05
WBGene00001262	emb-8	1088.06	-0.00249391	0.111912	-0.0222847	0.982221	0.990564	-1.39292	1.39292	0.223646	6.22824	4.71702e-10	3.12049e-09
WBGene00001263	emb-9	1423.37	-0.160336	0.188002	-0.852843	0.393747	0.602182	2.37218	-2.37218	0.174388	-13.6029	3.85021e-42	2.39865e-40
WBGene00001281	emb-27	424.028	-0.109803	0.146438	-0.749824	0.453361	0.654059	-1.85458	1.85458	0.357214	5.1918	2.08269e-07	9.22119e-07
WBGene00001284	emb-30	372.808	-0.492376	0.165678	-2.97188	0.00295978	0.0144491	-0.45739	0.45739	0.385315	1.18706	0.235206	0.287627
WBGene00001303	emo-1	777.648	-0.729279	0.113493	-6.42577	1.31204e-10	3.43254e-09	-0.229174	0.229174	0.244066	0.938985	0.347739	0.404188
WBGene00001309	emr-1	602.751	-0.245809	0.126617	-1.94136	0.0522143	0.148849	-2.14733	2.14733	0.325647	6.59404	4.28031e-11	3.22531e-10
WBGene00001310	end-1	9.93345	1.04985	0.607018	1.72951	0.0837171	0.211052
WBGene00001311	end-3	20.4574	0.00175021	0.441966	0.00396005	0.99684	0.998193
WBGene00001320	ent-1	991.382	-0.591428	0.187923	-3.14719	0.00164849	0.00878913	-1.83603	1.83603	0.214809	8.54728	1.26023e-17	1.86024e-16
WBGene00001324	eor-1	324.962	-0.0950355	0.232115	-0.409433	0.682222	0.824151	-0.666397	0.666397	0.370693	1.7977	0.0722238	0.100963
WBGene00001325	eor-2	199.147	-0.222302	0.215492	-1.0316	0.302257	0.510802	0.0486335	-0.0486335	0.526268	-0.0924121	0.926371	0.937629
WBGene00001328	epi-1	758.849	0.15898	0.128001	1.24202	0.214229	0.408736	1.9783	-1.9783	0.293099	-6.7496	1.48249e-11	1.18839e-10
WBGene00001329	epn-1	492.108	0.636467	0.178652	3.5626	0.000367205	0.00242033	0.630644	-0.630644	0.245575	-2.56803	0.0102278	0.0176379
WBGene00001330	eps-8	265.303	-0.612947	0.1767	-3.46885	0.000522684	0.00328023	0.785291	-0.785291	0.322428	-2.43556	0.0148689	0.0246371
WBGene00001331	erd-2	454.616	0.726832	0.146488	4.96173	6.98693e-07	9.15363e-06	1.9466	-1.9466	0.219234	-8.87908	6.74171e-19	1.1206e-17
WBGene00001332	eri-1	288.906	-0.304661	0.174768	-1.74323	0.0812938	0.206869	-1.49923	1.49923	0.507559	2.9538	0.00313891	0.00609748
WBGene00001333	erm-1	839.98	-0.401919	0.153086	-2.62544	0.00865359	0.0353621	0.00182165	-0.00182165	0.208028	-0.00875675	0.993013	0.994522
WBGene00001334	ero-1	475.992	-0.0841926	0.132931	-0.633358	0.5265	0.713159	-0.0505306	0.0505306	0.290015	0.174234	0.861681	0.883684
WBGene00001335	F35A5.8	71.2188	-0.230612	0.26506	-0.870035	0.384281	0.594047	0.799425	-0.799425	0.548986	-1.45619	0.145341	0.18796
WBGene00001336	qars-1	1155.24	-0.430076	0.121048	-3.55293	0.000380961	0.00249839	-0.567295	0.567295	0.212062	2.67514	0.00746991	0.0132843
WBGene00001337	ears-1	1137.36	-0.779154	0.155328	-5.01618	5.27093e-07	7.09715e-06	0.269874	-0.269874	0.195623	-1.37956	0.167721	0.213105
WBGene00001338	ears-2	148.563	-0.836279	0.205272	-4.074	4.62122e-05	0.000396682	-0.422773	0.422773	0.599246	0.705507	0.480495	0.534393
WBGene00001340	etr-1	506.107	-0.243037	0.159663	-1.52219	0.127961	0.285536	-0.146553	0.146553	0.266961	0.54897	0.583026	0.632078
WBGene00001345	fos-1	144.425	0.294157	0.222635	1.32125	0.186417	0.371281	1.14193	-1.14193	0.430742	-2.65107	0.00802363	0.0141514
WBGene00001352	evl-14	432.882	-0.362684	0.146334	-2.47846	0.0131951	0.0500872	-1.42387	1.42387	0.366594	3.88404	0.000102734	0.000277416
WBGene00001358	evl-20	145.121	-1.0333	0.212963	-4.85202	1.22209e-06	1.52014e-05	-1.24129	1.24129	0.689903	1.79923	0.0719825	0.100685
WBGene00001362	exc-1	27.489	-0.198576	0.433678	-0.457889	0.647032	0.80295
WBGene00001365	exc-4	49.8597	0.0128122	0.266593	0.0480591	0.961669	0.981615
WBGene00001366	exc-5	111.773	0.168015	0.249585	0.673175	0.500836	0.693499	2.75929	-2.75929	0.680104	-4.05716	4.96736e-05	0.000142398
WBGene00001368	exc-7	80.0754	0.341839	0.227887	1.50003	0.133606	0.295338
WBGene00001371	exl-1	320.248	-0.455063	0.152074	-2.99239	0.00276806	0.0136863	0.394669	-0.394669	0.352864	-1.11847	0.263366	0.317403
WBGene00001372	exo-3	841.434	-0.72643	0.131888	-5.50794	3.63065e-08	6.04954e-07	-2.04132	2.04132	0.41222	4.95202	7.34485e-07	2.98013e-06
WBGene00001373	exp-1	75.1228	0.24115	0.242377	0.99494	0.319765	0.528571
WBGene00001374	exp-2	97.4049	0.35085	0.327868	1.0701	0.284576	0.491281	1.16172	-1.16172	0.769094	-1.5105	0.130916	0.171717
WBGene00001377	eya-1	47.5506	0.753706	0.408734	1.844	0.0651827	0.175644
WBGene00001385	far-1	4538.98	-0.444163	0.145628	-3.04999	0.00228852	0.0116268	2.01001	-2.01001	0.149254	-13.467	2.44441e-41	1.4326e-39
WBGene00001386	far-2	32095.9	-0.0492776	0.148134	-0.332656	0.739394	0.859471	1.95542	-1.95542	0.116409	-16.7978	2.53067e-63	3.92601e-61
WBGene00001387	far-3	2946.35	1.71216	0.914593	1.87205	0.0612	0.167782	3.17447	-3.17447	0.251987	-12.5977	2.1726e-36	1.1019e-34
WBGene00001388	far-4	26.9006	1.29435	0.432548	2.99239	0.00276805	0.0136863
WBGene00001389	far-5	155.777	0.33866	0.222849	1.51968	0.128591	0.286529	1.94563	-1.94563	0.344955	-5.64023	1.69825e-08	8.85149e-08
WBGene00001390	far-6	664.242	0.475799	0.148299	3.20837	0.0013349	0.00731624	1.73487	-1.73487	0.22283	-7.78559	6.9387e-15	7.84271e-14
WBGene00001391	far-7	19.0142	0.714941	0.454986	1.57135	0.116102	0.266608
WBGene00001392	far-8	667.528	-0.413228	0.174756	-2.3646	0.0180494	0.0644638	1.91631	-1.91631	0.286375	-6.69162	2.20721e-11	1.7446e-10
WBGene00001393	fat-1	4761.26	0.324506	0.124927	2.59758	0.00938846	0.0379359	2.40045	-2.40045	0.1103	-21.7629	5.20969e-105	2.74794e-102
WBGene00001394	fat-2	9463.3	0.583579	0.164689	3.54353	0.000394812	0.00257729	3.23241	-3.23241	0.126336	-25.5857	2.19843e-144	2.48485e-141
WBGene00001395	fat-3	1851.72	0.823421	0.143023	5.75726	8.54889e-09	1.62181e-07	3.20578	-3.20578	0.173267	-18.502	1.99025e-76	4.14391e-74
WBGene00001396	fat-4	2893.03	0.0762557	0.140371	0.543245	0.586961	0.757811	1.88749	-1.88749	0.169794	-11.1164	1.04427e-28	3.51586e-27
WBGene00001397	fat-5	487.856	0.90719	0.248279	3.65392	0.00025827	0.00177897	2.11876	-2.11876	0.212005	-9.99394	1.62006e-23	3.81487e-22
WBGene00001398	fat-6	2814.37	0.332936	0.176938	1.88166	0.0598825	0.164949	2.338	-2.338	0.151114	-15.4717	5.38631e-54	5.91896e-52
WBGene00001399	fat-7	168.682	-3.02965	0.30995	-9.77462	1.44706e-22	1.24089e-20	1.40992	-1.40992	0.476693	-2.95772	0.00309924	0.00603078
WBGene00001400	fax-1	8.18241	-0.957026	0.712009	-1.34412	0.178909	1
WBGene00001401	fbf-1	211.481	-0.491897	0.238649	-2.06117	0.0392867	0.119736	-0.80828	0.80828	0.441137	1.83227	0.0669118	0.0942507
WBGene00001402	fbf-2	145.309	-0.703918	0.219362	-3.20893	0.00133231	0.00730899	-0.738116	0.738116	0.571599	1.29132	0.196593	0.245648
WBGene00001403	fbl-1	177.707	0.267556	0.176925	1.51226	0.130468	0.290027	-0.151973	0.151973	0.527683	0.288001	0.773346	0.806049
WBGene00001404	fbp-1	570.227	-0.293693	0.110714	-2.65272	0.0079845	0.0331464	0.871782	-0.871782	0.223703	-3.89706	9.73677e-05	0.000263826
WBGene00001405	fce-1	613.387	-0.724567	0.112773	-6.42498	1.31883e-10	3.445e-09	-0.191934	0.191934	0.311612	0.615939	0.537935	0.589983
WBGene00001406	fce-2	83.4615	-0.953861	0.240836	-3.96062	7.47555e-05	0.000610228
WBGene00001410	feh-1	89.9129	0.955624	0.262993	3.63365	0.000279437	0.00190775
WBGene00001411	fem-1	391.903	-0.436077	0.190292	-2.29162	0.0219276	0.0750622	-0.612272	0.612272	0.285178	2.14698	0.031795	0.0485829
WBGene00001412	fem-2	585.476	-0.671513	0.181	-3.71001	0.000207249	0.00147172	-1.56223	1.56223	0.283877	5.50318	3.72997e-08	1.84909e-07
WBGene00001413	fem-3	477.113	-0.0181469	0.173896	-0.104355	0.916888	0.96006	-2.68552	2.68552	0.378608	7.09314	1.31104e-12	1.19919e-11
WBGene00001414	fer-1	178.414	0.146566	0.28434	0.515459	0.606233	0.772648	0.565828	-0.565828	0.610259	-0.927194	0.353826	0.410479
WBGene00001423	fib-1	2837.62	-1.26683	0.13253	-9.55882	1.19111e-21	9.4948e-20	-0.673964	0.673964	0.143963	4.68149	2.84793e-06	1.04126e-05
WBGene00001424	fis-1	25.1199	-0.0839957	0.415532	-0.20214	0.839807	0.917614
WBGene00001425	fis-2	115.899	0.148336	0.226044	0.656225	0.511679	0.701704	0.716467	-0.716467	0.583093	-1.22874	0.219171	0.269644
WBGene00001426	fkb-1	685.699	-0.146461	0.133823	-1.09444	0.273762	0.480285	1.51173	-1.51173	0.2639	-5.72842	1.01369e-08	5.48962e-08
WBGene00001427	fkb-2	853.965	-0.557406	0.129388	-4.30801	1.64728e-05	0.000158736	0.699131	-0.699131	0.215023	-3.25143	0.00114827	0.0024681
WBGene00001428	fkb-3	84.9069	0.185806	0.26344	0.705308	0.480619	0.67781	1.9501	-1.9501	0.60111	-3.24415	0.001178	0.00252105
WBGene00001429	fkb-4	13.9586	0.671464	0.540965	1.24123	0.214519	0.408871
WBGene00001430	fkb-5	44.5143	0.0317399	0.30536	0.103942	0.917215	0.960129	1.50511	-1.50511	0.475129	-3.16779	0.001536	0.00318805
WBGene00001431	fkb-6	1027.52	-0.245256	0.119795	-2.0473	0.0406283	0.122723	-0.962614	0.962614	0.270255	3.56187	0.000368219	0.000882464
WBGene00001432	fkb-7	24.6418	-0.376005	0.484856	-0.775497	0.438046	0.640784
WBGene00001433	fkb-8	52.2932	0.585685	0.263184	2.22539	0.0260553	0.0862365
WBGene00001434	fkh-2	12.2731	0.573431	0.610731	0.938926	0.347769	0.558106
WBGene00001435	fkh-3	24.6091	0.950973	0.43055	2.20874	0.0271929	0.0892708
WBGene00001436	fkh-4	33.6055	0.78074	0.326146	2.39383	0.0166733	0.060426
WBGene00001437	fkh-5	19.1137	1.01786	0.517821	1.96565	0.049339	0.142446
WBGene00001438	fkh-6	17.5431	-0.309454	0.47772	-0.647773	0.517132	0.706122
WBGene00001439	fkh-7	252.861	0.137241	0.262941	0.521946	0.601708	0.76968	0.59319	-0.59319	0.511584	-1.15952	0.246246	0.29937
WBGene00001440	fkh-8	34.6811	0.420486	0.39498	1.06458	0.287068	0.493982
WBGene00001441	fkh-9	393.997	-0.64755	0.14953	-4.33057	1.48725e-05	0.00014521	0.803868	-0.803868	0.291623	-2.75653	0.00584175	0.0106662
WBGene00001442	fkh-10	21.4082	0.951285	0.625613	1.52056	0.128369	0.286147
WBGene00001443	fli-1	467.558	-0.039197	0.163395	-0.239892	0.810414	0.90175	-0.460946	0.460946	0.328926	1.40137	0.161104	0.205656
WBGene00001444	flp-1	496.347	-0.786142	0.146367	-5.37102	7.82931e-08	1.23315e-06	0.791253	-0.791253	0.269609	-2.93482	0.0033374	0.00644036
WBGene00001445	flp-2	36.486	-0.0590567	0.362687	-0.162831	0.870651	0.935085
WBGene00001446	flp-3	112.899	-0.476035	0.223658	-2.1284	0.0333036	0.105046	0.73978	-0.73978	0.513599	-1.44038	0.149759	0.192979
WBGene00001447	flp-4	34.9202	-0.287423	0.334739	-0.858647	0.390535	0.599647
WBGene00001448	flp-5	147.869	-0.776534	0.204792	-3.79181	0.000149553	0.00110451	1.33033	-1.33033	0.417814	-3.18403	0.0014524	0.00303523
WBGene00001449	flp-6	81.3443	-0.0644149	0.300996	-0.214006	0.830543	0.91326	1.2839	-1.2839	0.527532	-2.43378	0.0149422	0.024738
WBGene00001450	flp-7	79.9793	-0.23786	0.23886	-0.995812	0.319341	0.528058
WBGene00001451	flp-8	125.872	-0.782849	0.203187	-3.85286	0.000116747	0.000894515	0.487652	-0.487652	0.64625	-0.754587	0.450497	0.505221
WBGene00001452	flp-9	344.866	-0.191955	0.149478	-1.28417	0.199082	0.387818	1.29357	-1.29357	0.31689	-4.08208	4.46351e-05	0.000129171
WBGene00001453	flp-10	75.7725	0.128112	0.250631	0.511159	0.60924	0.775044	1.24755	-1.24755	0.719079	-1.73493	0.0827526	0.114086
WBGene00001454	flp-11	258.214	-0.249525	0.196214	-1.2717	0.20348	0.393395	1.08659	-1.08659	0.315507	-3.44395	0.000573274	0.00131815
WBGene00001455	flp-12	160.858	-0.142463	0.1946	-0.732078	0.464121	0.663102	1.54754	-1.54754	0.428925	-3.60794	0.000308633	0.000752744
WBGene00001456	flp-13	96.8181	-0.267999	0.22005	-1.2179	0.223262	0.420402	0.633288	-0.633288	0.631364	-1.00305	0.315838	0.371264
WBGene00001457	flp-14	525.039	-0.451454	0.128278	-3.51933	0.000432631	0.0027909	1.21727	-1.21727	0.255764	-4.75933	1.94236e-06	7.3007e-06
WBGene00001458	flp-15	80.182	0.282682	0.274582	1.0295	0.303245	0.511601	1.3344	-1.3344	0.470211	-2.83788	0.00454145	0.00852276
WBGene00001459	flp-16	62.2729	-0.776473	0.309388	-2.5097	0.0120832	0.0466806
WBGene00001460	flp-17	84.4886	-0.59006	0.225997	-2.61092	0.00902978	0.036705	1.89331	-1.89331	0.620295	-3.05227	0.00227116	0.00456309
WBGene00001461	flp-18	125.201	-0.463114	0.230913	-2.00558	0.0449015	0.132704	1.86108	-1.86108	0.431374	-4.3143	1.60108e-05	5.06103e-05
WBGene00001462	flp-19	102.465	-0.411382	0.242949	-1.69329	0.0904008	0.223781	0.922943	-0.922943	0.464166	-1.98839	0.0467686	0.0684735
WBGene00001463	flp-20	18.0413	0.0163856	0.454388	0.0360609	0.971234	0.985998
WBGene00001464	flp-21	23.9278	0.489278	0.417409	1.17218	0.241125	0.441942
WBGene00001465	flr-1	81.7563	0.53876	0.23535	2.28919	0.0220686	0.0754232	2.93751	-2.93751	0.640743	-4.58454	4.54994e-06	1.59218e-05
WBGene00001466	flr-2	26.9062	0.44981	0.362314	1.24149	0.214423	0.408745
WBGene00001468	flr-4	74.5269	-0.386118	0.308377	-1.2521	0.210533	0.403824	0.221538	-0.221538	0.588603	-0.37638	0.706634	0.746541
WBGene00001470	baz-2	220.252	0.184463	0.211159	0.873572	0.382351	0.592211	-0.780029	0.780029	0.548114	1.42311	0.154703	0.19851
WBGene00001475	fmi-1	232.933	0.360825	0.220911	1.63335	0.102396	0.244482	-0.0128451	0.0128451	0.600442	0.0213927	0.982932	0.986298
WBGene00001476	fmo-1	168.073	-0.978456	0.208328	-4.69671	2.64388e-06	3.07259e-05	0.306514	-0.306514	0.65905	-0.465084	0.641871	0.687396
WBGene00001477	fmo-2	12.9694	-0.192474	0.584379	-0.329366	0.741879	0.861044
WBGene00001478	fmo-3	158.644	0.652168	0.229407	2.84284	0.0044713	0.0205018	1.29893	-1.29893	0.358055	-3.62772	0.000285934	0.000701927
WBGene00001479	fmo-4	113.944	0.21989	0.248273	0.885677	0.375791	0.585957	1.99825	-1.99825	0.436041	-4.58271	4.58985e-06	1.60331e-05
WBGene00001480	fmo-5	136.982	0.256254	0.210249	1.21881	0.222915	0.419842	2.7218	-2.7218	0.567877	-4.79295	1.6435e-06	6.27878e-06
WBGene00001481	fog-1	220.086	0.840608	0.226794	3.70648	0.000210163	0.00149054	-1.61217	1.61217	0.450696	3.57706	0.000347484	0.000836924
WBGene00001482	fog-2	192.254	-0.740161	0.163015	-4.54044	5.61371e-06	6.10213e-05	-1.81677	1.81677	0.565056	3.21521	0.0013035	0.00275757
WBGene00001483	fog-3	31.2663	0.843798	0.351308	2.40187	0.0163113	0.0592532
WBGene00001484	fox-1	76.3722	0.520761	0.26224	1.98582	0.0470537	0.137414
WBGene00001485	fre-1	223.831	-0.490307	0.198855	-2.46565	0.0136766	0.0516608	-0.10083	0.10083	0.425078	0.237203	0.812499	0.841095
WBGene00001486	frh-1	171.769	-0.275294	0.193187	-1.42501	0.154153	0.325795	-1.54492	1.54492	0.52674	2.93299	0.00335716	0.00647535
WBGene00001488	frm-1	1491.69	0.217652	0.141622	1.53685	0.124331	0.280161	1.29936	-1.29936	0.167753	-7.74568	9.50724e-15	1.06395e-13
WBGene00001489	frm-2	163.543	0.291872	0.205246	1.42206	0.155009	0.327025	1.63337	-1.63337	0.36396	-4.48776	7.19745e-06	2.42015e-05
WBGene00001490	frm-3	100.689	-0.095272	0.282282	-0.337507	0.735735	0.857488	0.0942799	-0.0942799	0.608059	-0.155051	0.876781	0.895571
WBGene00001491	frm-4	520.523	-0.154524	0.129618	-1.19215	0.233203	0.432549	-0.204506	0.204506	0.259031	0.789505	0.429817	0.485955
WBGene00001492	frm-5.1	18.2356	-0.246248	0.643418	-0.382718	0.701929	0.835996
WBGene00001493	frm-7	310.077	0.366551	0.183566	1.99684	0.0458428	0.134619	1.00129	-1.00129	0.319601	-3.13292	0.00173076	0.00355499
WBGene00001494	frm-8	153.828	0.516145	0.231299	2.2315	0.025648	0.0852373	-1.03728	1.03728	0.625123	1.65932	0.0970518	0.131598
WBGene00001495	frm-9	238.665	0.0450127	0.252859	0.178015	0.858711	0.929495	0.459886	-0.459886	0.494304	-0.930371	0.352179	0.408809
WBGene00001496	frm-10	811.81	0.495444	0.138772	3.57021	0.0003567	0.00235842	-0.412022	0.412022	0.277674	1.48383	0.137853	0.179449
WBGene00001497	fars-1	594.306	-0.77488	0.134663	-5.7542	8.70555e-09	1.64784e-07	-0.0281462	0.0281462	0.285145	0.0987082	0.92137	0.933762
WBGene00001498	fars-3	514.818	-0.704081	0.153248	-4.59438	4.34038e-06	4.82931e-05	0.0512602	-0.0512602	0.238623	-0.214817	0.82991	0.856653
WBGene00001499	fsn-1	928.548	-0.496204	0.162525	-3.0531	0.00226489	0.0115309	-2.26587	2.26587	0.273952	8.27104	1.32793e-16	1.77476e-15
WBGene00001500	ftn-1	133.195	-0.0541077	0.843128	-0.0641749		1	5.37373	-5.37373	0.658028	-8.16642	3.17679e-16	4.14082e-15
WBGene00001501	ftn-2	4358.67	-0.322048	0.101038	-3.18739	0.00143565	0.00779781	2.41122	-2.41122	0.126938	-18.9953	1.86485e-80	4.61083e-78
WBGene00001502	ftt-2	1221.43	-0.118997	0.122214	-0.973676	0.330218	0.539943	1.31031	-1.31031	0.177688	-7.37421	1.65318e-13	1.65779e-12
WBGene00001503	fum-1	1986.65	-0.387592	0.134316	-2.88567	0.00390587	0.0182895	0.456039	-0.456039	0.174626	-2.61152	0.00901398	0.0156986
WBGene00001505	fut-1	109.544	0.190756	0.223615	0.853055	0.393629	0.602116	1.00098	-1.00098	0.551828	-1.81393	0.0696886	0.0978485
WBGene00001507	fut-4	10.7802	-0.118656	0.646877	-0.183429	0.854461	0.926726
WBGene00001508	fut-8	77.2772	0.351904	0.313597	1.12215	0.261798	0.466895	2.21524	-2.21524	0.504557	-4.39046	1.13112e-05	3.67987e-05
WBGene00001509	fzo-1	497.877	-0.47591	0.149443	-3.18456	0.00144973	0.0078667	-1.26444	1.26444	0.320119	3.94992	7.81762e-05	0.000215741
WBGene00001510	fzr-1	302.799	-0.114798	0.216063	-0.531319	0.595198	0.764826	-0.239188	0.239188	0.338836	0.705909	0.480245	0.53419
WBGene00001511	fzy-1	690.205	-0.235698	0.157486	-1.49663	0.13449	0.296714	-2.59941	2.59941	0.342903	7.58059	3.43977e-14	3.63843e-13
WBGene00001512	gab-1	27.7465	0.111103	0.61626	0.180286	0.856928	0.928512
WBGene00001513	gad-1	547.388	-0.826756	0.135636	-6.09539	1.09174e-09	2.44547e-08	-0.681606	0.681606	0.265749	2.56485	0.0103221	0.0177772
WBGene00001514	xnd-1	717.713	-0.773096	0.144626	-5.34547	9.01812e-08	1.40734e-06	-2.47774	2.47774	0.366823	6.75458	1.43246e-11	1.15179e-10
WBGene00001515	gap-1	14.606	0.0907431	0.524943	0.172863	0.862759	0.93162
WBGene00001516	gap-2	239.463	-0.0365701	0.252406	-0.144886	0.884801	0.942238	0.195129	-0.195129	0.419948	-0.464651	0.642181	0.687636
WBGene00001517	gar-1	74.0213	0.467339	0.383332	1.21915	0.222788	0.419696
WBGene00001518	gar-2	79.9992	0.488666	0.326641	1.49603	0.134645	0.2969
WBGene00001519	gar-3	85.3781	0.323813	0.301167	1.0752	0.282287	0.488977
WBGene00001520	gas-1	562.136	-0.0835607	0.136249	-0.613295	0.539681	0.722711	1.57561	-1.57561	0.308471	-5.10779	3.25942e-07	1.4046e-06
WBGene00001522	gbh-1	185.771	0.449649	0.184661	2.435	0.0148919	0.0551713	2.18183	-2.18183	0.390407	-5.58861	2.28892e-08	1.16914e-07
WBGene00001523	gbh-2	60.6564	0.443653	0.291326	1.52288	0.12779	0.28531	1.36574	-1.36574	0.607641	-2.24761	0.0246012	0.0385817
WBGene00001526	gck-1	363.238	-0.17725	0.168644	-1.05103	0.293245	0.501026	-0.0807987	0.0807987	0.330479	0.24449	0.806851	0.836124
WBGene00001527	gcs-1	577.381	-0.420239	0.146678	-2.86505	0.00416946	0.0193108	0.542028	-0.542028	0.242549	-2.23471	0.0254361	0.0397492
WBGene00001528	gcy-1	22.0227	0.946015	0.559246	1.69159	0.0907238	0.224221
WBGene00001529	gcy-2	22.56	0.348862	0.500186	0.697464	0.485512	0.682071
WBGene00001530	gcy-3	24.3801	1.24684	0.413787	3.01325	0.00258465	0.0129187
WBGene00001531	gcy-4	28.47	0.105785	0.372144	0.284257	0.776213	0.881147
WBGene00001532	gcy-5	44.0221	0.273177	0.428453	0.637589	0.523741	0.710818
WBGene00001533	gcy-6	12.8611	1.031	0.714454	1.44306	0.149005	0.318273
WBGene00001534	gcy-7	20.2505	1.06505	0.597911	1.78129	0.0748655	0.194543
WBGene00001535	gcy-8	116.487	0.0345936	0.230403	0.150144	0.880651	0.940118	2.84659	-2.84659	0.487773	-5.8359	5.35025e-09	3.04103e-08
WBGene00001536	gcy-9	62.719	0.856851	0.348801	2.45656	0.0140274	0.052786
WBGene00001537	gcy-11	89.7377	0.471777	0.25284	1.86591	0.0620541	0.169528	0.603777	-0.603777	0.677128	-0.891674	0.372568	0.429326
WBGene00001538	gcy-12	105.351	-0.149783	0.240809	-0.622	0.533942	0.718937
WBGene00001539	gcy-13	22.5271	0.710991	0.556583	1.27742	0.201454	0.390501
WBGene00001540	gcy-14	152.628	0.578755	0.266953	2.168	0.0301587	0.097129	0.741925	-0.741925	0.71964	-1.03097	0.302557	0.357929
WBGene00001541	gcy-15	22.0063	0.243148	0.397328	0.611958	0.540566	0.723279
WBGene00001542	gcy-17	28.9701	0.123917	0.463294	0.26747	0.789107	0.888978
WBGene00001543	gcy-18	73.0104	0.342889	0.313671	1.09315	0.274328	0.480733
WBGene00001544	gcy-19	157.466	0.137052	0.289409	0.473557	0.635816	0.795231
WBGene00001545	gcy-20	21.5431	0.742254	0.527715	1.40654	0.159563	0.333977
WBGene00001546	gcy-21	74.3571	-0.449175	0.431162	-1.04178	0.297515	0.505201
WBGene00001547	gcy-22	91.083	0.742649	0.290312	2.55811	0.0105242	0.0417015
WBGene00001548	gcy-23	45.1916	-0.0125401	0.487614	-0.0257172	0.979483	0.989507
WBGene00001549	gcy-25	46.696	0.22599	0.323797	0.697937	0.485217	0.682039
WBGene00001550	gcy-27	7.5921	0.661192	0.847772	0.779917	0.43544	1
WBGene00001551	gcy-31	15.9522	0.57126	0.49917	1.14442	0.252449	0.455266
WBGene00001552	gcy-32	30.7777	-0.00425943	0.489827	-0.00869579	0.993062	0.996348
WBGene00001553	gcy-33	21.8739	0.241393	0.400287	0.603051	0.546475	0.728054
WBGene00001554	gcy-34	67.0399	0.262489	0.308066	0.852055	0.394184	0.60247
WBGene00001555	gcy-35	21.3468	1.20276	0.517257	2.32527	0.0200573	0.0700582
WBGene00001556	gcy-36	25.0127	-0.265881	0.530237	-0.501438	0.616063	0.780665
WBGene00001557	gcy-37	35.1749	1.20772	0.393166	3.07177	0.00212792	0.0109442
WBGene00001558	gdi-1	1213.06	-0.154981	0.115606	-1.3406	0.18005	0.36218	0.469033	-0.469033	0.164243	-2.85573	0.00429376	0.00810212
WBGene00001559	gei-1	185.428	0.300056	0.189425	1.58403	0.113186	0.262109	1.21056	-1.21056	0.450628	-2.6864	0.00722276	0.0128853
WBGene00001560	gei-3	656.004	-0.305544	0.122706	-2.49005	0.0127724	0.048799	1.51085	-1.51085	0.22361	-6.75661	1.41263e-11	1.14027e-10
WBGene00001561	gei-4	375.304	-0.26212	0.164675	-1.59174	0.111443	0.259246	-1.06612	1.06612	0.331635	3.21474	0.00130561	0.0027613
WBGene00001562	lin-66	356.037	0.132651	0.211255	0.627921	0.530055	0.715691	0.924153	-0.924153	0.302951	-3.0505	0.00228457	0.0045877
WBGene00001563	gei-6	699.337	-0.414415	0.125108	-3.31247	0.000924777	0.00534256	-0.980139	0.980139	0.302078	3.24466	0.00117592	0.00251796
WBGene00001564	icl-1	1354.12	0.764187	0.230886	3.30981	0.000933606	0.00538623	1.62059	-1.62059	0.233815	-6.93108	4.17635e-12	3.54923e-11
WBGene00001565	gei-8	170.592	0.54522	0.230007	2.37045	0.0177666	0.0636815	0.367919	-0.367919	0.451653	-0.814606	0.415298	0.471832
WBGene00001566	acdh-13	186.103	-0.355582	0.228974	-1.55293	0.120439	0.273862	0.971659	-0.971659	0.442048	-2.19808	0.0279431	0.0432738
WBGene00001568	snpc-4	359.129	-0.419364	0.156401	-2.68134	0.00733283	0.0309173	-1.37381	1.37381	0.443662	3.09652	0.00195807	0.00398362
WBGene00001569	meg-3	229.394	0.284938	0.212455	1.34117	0.179866	0.361963	-3.30359	3.30359	0.645473	5.11809	3.08652e-07	1.34032e-06
WBGene00001570	gei-13	18.0112	-1.40477	0.485676	-2.89241	0.00382295	0.0179408
WBGene00001571	gei-14	348.521	-0.87401	0.132588	-6.59194	4.34122e-11	1.22441e-09	-1.55213	1.55213	0.429395	3.6147	0.000300696	0.000734973
WBGene00001572	gei-15	106.268	-0.25368	0.198849	-1.27574	0.202046	0.39128	1.47726	-1.47726	0.66701	-2.21474	0.0267778	0.0416158
WBGene00001574	gei-17	1084.67	0.285797	0.16922	1.68891	0.091237	0.224966	-0.960211	0.960211	0.256556	3.7427	0.000182054	0.000465701
WBGene00001575	gei-18	12.6196	-0.202077	0.684608	-0.295172	0.767863	0.875708
WBGene00001577	gem-4	185.539	0.486057	0.206702	2.35148	0.0186987	0.0662672	0.346607	-0.346607	0.605801	-0.572147	0.567223	0.616804
WBGene00001578	ges-1	200.983	1.00995	0.171617	5.88494	3.98195e-09	7.98224e-08	2.3545	-2.3545	0.448001	-5.25557	1.4757e-07	6.69479e-07
WBGene00001579	gex-2	230.208	0.193485	0.27277	0.709334	0.478117	0.67582	0.204411	-0.204411	0.45296	-0.451279	0.651789	0.696133
WBGene00001580	gex-3	578.736	-0.354431	0.174869	-2.02683	0.0426793	0.127378	-0.61971	0.61971	0.261858	2.36659	0.0179528	0.0291324
WBGene00001581	gfi-1	1120.71	-0.287901	0.150874	-1.90822	0.0563627	0.157606	2.24536	-2.24536	0.184239	-12.1872	3.63706e-34	1.62579e-32
WBGene00001582	gfi-2	602.053	-0.309026	0.150815	-2.04905	0.0404576	0.122369	-0.540136	0.540136	0.25088	2.15296	0.0313215	0.0479519
WBGene00001583	gfi-3	129.112	0.332668	0.268304	1.23989	0.215015	0.409459	0.209106	-0.209106	0.572444	-0.365286	0.714898	0.753266
WBGene00001584	nrde-4	512.195	-0.974229	0.124724	-7.81106	5.67086e-15	2.66719e-13	-0.426763	0.426763	0.418194	1.02049	0.307497	0.362959
WBGene00001585	gfl-1	211.663	-0.398714	0.178857	-2.22924	0.0257981	0.0855686	-1.74091	1.74091	0.57527	3.02625	0.00247609	0.00493223
WBGene00001586	ggr-1	17.6864	0.596109	0.435688	1.3682	0.171249	0.350698
WBGene00001587	ggr-2	63.6586	0.333067	0.360329	0.924341	0.355309	0.566193
WBGene00001588	ggr-3	34.2415	0.850183	0.348064	2.44261	0.0145817	0.0543182
WBGene00001589	gip-1	371.401	-0.179527	0.150357	-1.19401	0.232474	0.431622	-0.651416	0.651416	0.394622	1.65073	0.0987928	0.133615
WBGene00001590	C45G3.3	254.67	-0.565224	0.183409	-3.08176	0.0020578	0.0106263	-1.72042	1.72042	0.491867	3.49773	0.000469232	0.00109969
WBGene00001591	glc-1	321.362	0.276748	0.148191	1.86751	0.061831	0.169082	0.534471	-0.534471	0.419064	-1.27539	0.20217	0.25143
WBGene00001592	glc-2	87.627	0.10214	0.224363	0.455246	0.648932	0.804484	1.40385	-1.40385	0.613985	-2.28645	0.0222278	0.0352015
WBGene00001593	glc-3	62.4254	0.271354	0.321194	0.844829	0.398206	0.605566
WBGene00001594	glc-4	28.2738	-0.305335	0.47987	-0.636286	0.52459	0.711411
WBGene00001595	gld-1	1996.56	-1.07773	0.162805	-6.61978	3.59735e-11	1.02654e-09	-1.94064	1.94064	0.27743	6.99508	2.65105e-12	2.30749e-11
WBGene00001596	gld-2	652.982	-0.447112	0.218749	-2.04395	0.0409584	0.123319	-0.275788	0.275788	0.248498	1.10982	0.267076	0.321238
WBGene00001597	gld-3	1298.52	-0.260942	0.157912	-1.65245	0.0984418	0.237624	-2.59946	2.59946	0.328813	7.90558	2.66689e-15	3.13527e-14
WBGene00001598	glh-1	2371.63	-1.20803	0.136174	-8.87121	7.23558e-19	4.65352e-17	-0.844823	0.844823	0.172919	4.88565	1.03086e-06	4.05982e-06
WBGene00001599	glh-2	486.455	-0.670987	0.237133	-2.82957	0.004661	0.0212511	-1.43362	1.43362	0.336687	4.25802	2.06246e-05	6.38176e-05
WBGene00001600	glh-3	193.475	-0.0486792	0.241347	-0.201698	0.840153	0.91775	-2.31964	2.31964	0.562314	4.12516	3.70478e-05	0.000108725
WBGene00001601	glh-4	398.124	-0.520558	0.187665	-2.77387	0.00553942	0.0246021	-1.22227	1.22227	0.365534	3.3438	0.000826393	0.00183355
WBGene00001602	gln-1	83.8418	-0.182383	0.264643	-0.689166	0.490719	0.686093	0.835985	-0.835985	0.493537	-1.69387	0.0902909	0.123467
WBGene00001603	gln-2	12.67	0.984686	0.618946	1.59091	0.11163	0.259553
WBGene00001604	gln-3	766.117	-0.576548	0.147049	-3.92079	8.82586e-05	0.000702551	2.19189	-2.19189	0.196917	-11.1311	8.85684e-29	3.00752e-27
WBGene00001606	gln-5	1933.2	-0.205484	0.114071	-1.80137	0.0716447	0.188247	-3.15839	3.15839	0.260354	12.1312	7.22207e-34	3.21017e-32
WBGene00001607	gln-6	5071.45	-0.598367	0.0916028	-6.53219	6.48159e-11	1.77788e-09	-2.74823	2.74823	0.298613	9.20331	3.47081e-20	6.40117e-19
WBGene00001608	R07B1.8	13.8758	0.500909	0.553396	0.905156	0.365383	0.576779
WBGene00001609	glp-1	1650.37	-0.590634	0.0990442	-5.96334	2.47136e-09	5.09237e-08	-2.52246	2.52246	0.348165	7.24502	4.32372e-13	4.18206e-12
WBGene00001612	glr-1	31.5808	0.335318	0.402225	0.833658	0.404474	0.611591
WBGene00001613	glr-2	31.5616	0.602022	0.328284	1.83385	0.0666768	0.178622
WBGene00001614	glr-3	32.2874	0.822147	0.450686	1.82421	0.06812	0.181486
WBGene00001615	glr-4	59.7143	0.115868	0.323826	0.357809	0.720486	0.848458
WBGene00001616	glr-5	150.464	0.383445	0.320727	1.19555	0.231872	0.431023
WBGene00001617	glr-6	76.2248	0.154066	0.273004	0.564335	0.572526	0.747034
WBGene00001618	glr-7	25.2098	-0.0555935	0.420969	-0.132061	0.894936	0.947015
WBGene00001619	glr-8	46.0011	-0.338189	0.343891	-0.983418	0.325402	0.535524
WBGene00001620	glt-1	719.514	0.423911	0.135611	3.12594	0.00177235	0.00936593	1.52431	-1.52431	0.214926	-7.09228	1.31916e-12	1.20522e-11
WBGene00001621	glt-3	91.7399	0.477285	0.253722	1.88114	0.0599533	0.165059
WBGene00001622	glt-4	28.7551	-0.226757	0.420348	-0.539451	0.589576	0.760149
WBGene00001623	glt-5	50.3173	-0.0690559	0.326997	-0.211182	0.832745	0.913828
WBGene00001624	glt-6	21.2656	0.593267	0.460752	1.28761	0.197883	0.386235
WBGene00001625	glt-7	80.2915	-0.0155684	0.223506	-0.0696554	0.944468	0.973835
WBGene00001626	gly-1	8.96827	-0.771802	0.711662	-1.08451	0.27814	0.484612
WBGene00001627	gly-2	94.6695	0.0565807	0.251504	0.22497	0.822003	0.907925
WBGene00001628	gly-3	481.045	-0.0277337	0.176295	-0.157314	0.874997	0.937382	-0.956202	0.956202	0.318162	3.00539	0.0026524	0.00524739
WBGene00001629	gly-4	201.042	-0.133167	0.198417	-0.671146	0.502128	0.694395	0.673913	-0.673913	0.446793	-1.50833	0.131469	0.172273
WBGene00001630	gly-5	483.566	-0.0419102	0.146222	-0.28662	0.774403	0.87974	0.406069	-0.406069	0.295991	-1.3719	0.170095	0.215914
WBGene00001631	gly-6	140.826	0.0728041	0.189535	0.384119	0.700891	0.835352	0.154723	-0.154723	0.455671	-0.33955	0.734196	0.770828
WBGene00001632	gly-7	430.73	-0.390292	0.138611	-2.81574	0.00486649	0.0220518	-0.537062	0.537062	0.355205	1.51198	0.13054	0.171396
WBGene00001633	gly-8	266.026	0.240837	0.179417	1.34233	0.179488	0.361372	2.25879	-2.25879	0.380143	-5.94195	2.81648e-09	1.67046e-08
WBGene00001635	gly-10	424.347	-0.47581	0.132008	-3.60442	0.000312852	0.00210874	-0.625814	0.625814	0.320089	1.95513	0.0505682	0.0734525
WBGene00001636	gly-11	58.7691	0.447774	0.265962	1.6836	0.0922588	0.226925
WBGene00001637	gly-12	65.0897	0.1213	0.249976	0.485247	0.627501	0.789838	-0.00848292	0.00848292	0.692167	0.0122556	0.990222	0.991977
WBGene00001638	gly-13	255.346	0.0430654	0.146811	0.293339	0.769263	0.876187	1.77741	-1.77741	0.359383	-4.94573	7.58586e-07	3.0669e-06
WBGene00001639	gly-14	106.781	0.768024	0.233082	3.29507	0.000983955	0.00562321
WBGene00001641	gly-16	9.61144	0.152244	0.597102	0.254972	0.798745	0.895141
WBGene00001642	gly-17	12.4204	-0.920191	0.720873	-1.27649	0.201781	0.390877
WBGene00001643	gly-18	9.13455	-0.382571	0.643137	-0.594852	0.551943	0.731172
WBGene00001644	gly-19	44.216	0.307935	0.363285	0.84764	0.396638	0.604337
WBGene00001645	gly-20	604.403	0.17172	0.15888	1.08082	0.279779	0.486418	-1.88675	1.88675	0.334492	5.64065	1.69414e-08	8.83588e-08
WBGene00001646	gna-1	51.4421	0.598411	0.285392	2.09681	0.0360108	0.111799
WBGene00001647	gna-2	1878.15	0.0244994	0.147959	0.165582	0.868486	0.934068	-3.1038	3.1038	0.331557	9.3613	7.87625e-21	1.54632e-19
WBGene00001648	goa-1	704.717	-0.22867	0.151745	-1.50694	0.131827	0.292204	-0.0210143	0.0210143	0.274339	0.0765999	0.938942	0.948533
WBGene00001649	gob-1	268.592	-0.170158	0.182114	-0.934348	0.350125	0.560193	1.31025	-1.31025	0.32647	-4.01338	5.98555e-05	0.000169135
WBGene00001650	gon-1	193.82	-0.25808	0.253406	-1.01844	0.308467	0.517025	0.919524	-0.919524	0.499629	-1.84041	0.0657075	0.0926367
WBGene00001651	gon-2	325.622	0.00723173	0.192617	0.0375447	0.970051	0.985254	1.37372	-1.37372	0.25463	-5.39496	6.85379e-08	3.25103e-07
WBGene00001653	gon-4	462.289	-0.535118	0.156056	-3.42901	0.000605781	0.00372395	-1.28976	1.28976	0.321754	4.00854	6.1096e-05	0.000172455
WBGene00001660	gop-1	229.685	-0.279326	0.15635	-1.78655	0.074011	0.192946	-0.39809	0.39809	0.426205	0.934034	0.350287	0.406791
WBGene00001661	gop-2	454	-0.43579	0.128046	-3.40338	0.000665579	0.00402883	-1.18483	1.18483	0.360116	3.29013	0.0010014	0.00218147
WBGene00001662	gop-3	544.78	-0.753106	0.123983	-6.07425	1.24572e-09	2.73977e-08	-0.300673	0.300673	0.299234	1.00481	0.314989	0.370568
WBGene00001663	gpa-1	8.69468	0.31591	0.71732	0.440403	0.659645	0.810904
WBGene00001664	gpa-2	14.3018	0.522318	0.557603	0.93672	0.348902	0.559149
WBGene00001665	gpa-3	20.3961	0.0625709	0.450441	0.13891	0.889521	0.944225
WBGene00001666	gpa-4	27.1551	0.404705	0.486743	0.831455	0.405717	0.612652
WBGene00001667	gpa-5	8.18239	-0.316895	0.754433	-0.420044	0.674453	1
WBGene00001668	gpa-6	41.9394	0.0595311	0.390019	0.152637	0.878685	0.939023
WBGene00001669	gpa-7	35.5788	0.516512	0.380462	1.35759	0.174594	0.355319
WBGene00001671	gpa-9	37.6492	-0.0377837	0.338284	-0.111692	0.911068	0.95686
WBGene00001672	gpa-10	57.5234	0.329775	0.327087	1.00822	0.31335	0.521758
WBGene00001673	gpa-11	28.6284	1.07488	0.430223	2.49844	0.0124742	0.0478967
WBGene00001674	gpa-12	45.1815	0.2526	0.326066	0.77469	0.438523	0.641095
WBGene00001675	gpa-13	46.7155	0.273205	0.412348	0.66256	0.507612	0.698573
WBGene00001676	gpa-14	25.5281	0.553105	0.469386	1.17836	0.238654	0.439157
WBGene00001677	gpa-15	22.6986	0.989863	0.527605	1.87614	0.0606355	0.166429
WBGene00001678	gpa-16	102.454	-0.34932	0.196502	-1.7777	0.0754536	0.195575	-2.52126	2.52126	0.727125	3.46744	0.000525444	0.00121915
WBGene00001679	gpb-1	671.703	0.103089	0.173515	0.594123	0.55243	0.731418	-0.0685113	0.0685113	0.261959	0.261534	0.793681	0.824636
WBGene00001680	gpb-2	95.491	0.363821	0.238165	1.5276	0.126612	0.283401	2.00838	-2.00838	0.604314	-3.3234	0.000889274	0.00196042
WBGene00001681	gpc-1	33.4838	0.118398	0.357171	0.331487	0.740277	0.859959
WBGene00001682	gpc-2	330.474	-0.136135	0.17442	-0.780502	0.435096	0.638669	0.0957341	-0.0957341	0.330317	-0.289825	0.77195	0.805017
WBGene00001683	gpd-1	1305.28	-0.23056	0.11215	-2.05582	0.0397998	0.120866	-2.55263	2.55263	0.279809	9.12277	7.32315e-20	1.30356e-18
WBGene00001684	gpd-2	788.248	-0.440904	0.140729	-3.13301	0.00173025	0.00916674	1.55637	-1.55637	0.228537	-6.81015	9.74994e-12	7.97741e-11
WBGene00001685	gpd-3	1122.96	-0.414108	0.126131	-3.28315	0.00102655	0.00583139	1.83318	-1.83318	0.217701	-8.42062	3.745e-17	5.27232e-16
WBGene00001686	gpd-4	496.779	-0.447002	0.156465	-2.85688	0.00427831	0.0197074	-2.75611	2.75611	0.404061	6.82102	9.03958e-12	7.42691e-11
WBGene00001687	gpn-1	108.858	0.168569	0.277767	0.606872	0.543936	0.726231	0.155567	-0.155567	0.669292	-0.232436	0.816199	0.844595
WBGene00001688	gpr-1	103.094	-0.314976	0.210236	-1.4982	0.134081	0.296018
WBGene00001689	gpr-2	158.828	-0.390403	0.187262	-2.08479	0.037088	0.11464	-1.5226	1.5226	0.738642	2.06136	0.0392692	0.0585559
WBGene00001690	grd-1	24.3408	0.084654	0.414986	0.203993	0.838359	0.916876
WBGene00001691	grd-2	45.1301	-0.167197	0.374304	-0.446689	0.6551	0.808295
WBGene00001692	grd-3	696.586	-0.0314486	0.153027	-0.20551	0.837174	0.916052	-0.191784	0.191784	0.277691	0.69064	0.489792	0.542521
WBGene00001693	grd-4	97.4423	-0.704685	0.236508	-2.97954	0.00288685	0.0141723	1.79668	-1.79668	0.602314	-2.98296	0.00285479	0.0056074
WBGene00001694	grd-5	888.029	-0.00775709	0.148927	-0.0520864	0.95846	0.980284	0.2815	-0.2815	0.211053	-1.33379	0.182273	0.229897
WBGene00001696	grd-7	9.587	0.424298	0.872818	0.486124	0.626879	0.789246
WBGene00001697	grd-8	9.67137	-0.399169	0.620965	-0.64282	0.520341	0.708213
WBGene00001698	grd-9	14.5317	1.55958	0.589793	2.64428	0.00818646	0.0338277
WBGene00001699	grd-10	42.4566	-0.370166	0.361116	-1.02506	0.305334	0.513752
WBGene00001700	grd-11	25.3822	0.304871	0.471961	0.645967	0.518301	0.706831
WBGene00001701	grd-12	29.282	0.242966	0.482996	0.50304	0.614936	0.779452
WBGene00001702	grd-13	34.5541	-0.48789	0.371814	-1.31219	0.189456	0.375659
WBGene00001703	grd-14	86.6394	-0.956557	0.283053	-3.37943	0.000726369	0.00433956
WBGene00001704	grd-15	5.50341	0.742966	0.818075	0.908189	0.363779	1
WBGene00001705	grd-16	26.8445	0.688895	0.494278	1.39374	0.163396	0.339447
WBGene00001707	grh-1	14.048	0.69293	0.545033	1.27136	0.203602	0.393463
WBGene00001708	grk-1	115.574	-0.156769	0.211252	-0.742093	0.458031	0.657958	1.35527	-1.35527	0.648254	-2.09064	0.0365603	0.0549307
WBGene00001709	grk-2	68.6639	-0.0749951	0.382161	-0.19624	0.844423	0.920483
WBGene00001710	grl-1	19.8634	0.842725	0.453013	1.86027	0.062848	0.17123
WBGene00001711	grl-2	8.00202	0.659316	0.66372	0.993366	0.320532	1
WBGene00001712	grl-3	46.4913	0.330521	0.329176	1.00408	0.315338	0.523801
WBGene00001713	grl-4	124.834	-0.460655	0.205691	-2.23955	0.0251205	0.0838781	1.95919	-1.95919	0.342168	-5.7258	1.02946e-08	5.56359e-08
WBGene00001714	grl-5	30.6776	0.0407173	0.468333	0.086941	0.930718	0.966879
WBGene00001715	grl-6	22.4947	-0.125498	0.513901	-0.244206	0.807071	0.8994
WBGene00001716	grl-7	28.0529	0.0560649	0.496925	0.112824	0.91017	0.956577
WBGene00001717	grl-8	24.0362	0.542698	0.512264	1.05941	0.289412	0.496508
WBGene00001718	grl-9	21.5997	-0.124573	0.461913	-0.26969	0.787399	0.888016
WBGene00001719	grl-10	32.5825	0.363715	0.380052	0.957015	0.33856	0.548408
WBGene00001722	grl-13	24.7113	0.518056	0.377546	1.37217	0.170012	0.349025
WBGene00001723	grl-14	53.5381	0.0173497	0.330214	0.0525409	0.958098	0.980209
WBGene00001724	grl-15	21.0618	-0.810505	0.422941	-1.91635	0.0553201	0.155356
WBGene00001726	grl-17	10.7583	-0.576915	0.582656	-0.990146	0.322103	0.531537
WBGene00001727	grl-18	8.47098	0.558737	0.701772	0.79618	0.425927	1
WBGene00001730	grl-21	25.6052	2.95386	0.495237	5.96454	2.45318e-09	5.06723e-08
WBGene00001731	grl-22	18.4739	-0.345699	0.582282	-0.593696	0.552716	0.731511
WBGene00001734	grl-25	10.3452	1.07769	0.681533	1.58128	0.113814	0.262917
WBGene00001740	gro-1	120.135	-0.93235	0.206427	-4.51662	6.28355e-06	6.74389e-05
WBGene00001743	grp-1	259.598	-0.454443	0.164822	-2.75718	0.00583019	0.0256386	0.0574658	-0.0574658	0.3278	-0.175308	0.860838	0.883028
WBGene00001744	gars-1	596.027	-0.440764	0.197635	-2.23019	0.0257348	0.0854256	0.552316	-0.552316	0.248485	-2.22274	0.0262335	0.0408747
WBGene00001745	gsa-1	208.518	-0.024698	0.23393	-0.105579	0.915917	0.959604	1.56299	-1.56299	0.291068	-5.36986	7.87971e-08	3.70655e-07
WBGene00001746	gsk-3	327.547	-0.122849	0.14676	-0.837071	0.402553	0.609841	0.376354	-0.376354	0.303803	-1.23881	0.215416	0.265602
WBGene00001747	gsp-1	625.73	-0.387576	0.183255	-2.11495	0.0344338	0.10779	-0.0332076	0.0332076	0.198969	0.166898	0.86745	0.888104
WBGene00001748	gsp-2	622.732	-0.646159	0.144024	-4.48646	7.24154e-06	7.68944e-05	-1.16196	1.16196	0.276664	4.19989	2.67049e-05	8.08298e-05
WBGene00001749	gst-1	976.69	-0.83968	0.130696	-6.42467	1.32157e-10	3.44684e-09	-0.175084	0.175084	0.196491	0.891054	0.3729	0.429585
WBGene00001750	gst-2	10.3188	0.957515	0.628026	1.52464	0.127348	0.284635
WBGene00001751	gst-3	26.2904	-0.0350453	0.396745	-0.0883321	0.929613	0.96617
WBGene00001752	gst-4	612.731	-1.19567	0.199459	-5.99457	2.04019e-09	4.26081e-08	1.77791	-1.77791	0.225687	-7.87778	3.33261e-15	3.84929e-14
WBGene00001753	gst-5	303.494	-0.395153	0.161059	-2.45347	0.0141486	0.0531593	1.67228	-1.67228	0.266955	-6.26429	3.74539e-10	2.52415e-09
WBGene00001754	gst-6	147.096	-1.59293	0.262609	-6.06578	1.31313e-09	2.86209e-08	1.52038	-1.52038	0.324237	-4.68911	2.74397e-06	1.00694e-05
WBGene00001755	gst-7	1498.47	-0.251031	0.138132	-1.81733	0.069166	0.183667	-0.775897	0.775897	0.174814	4.43842	9.06203e-06	2.99744e-05
WBGene00001756	gst-8	14.2736	-0.730119	0.619581	-1.17841	0.238634	0.439157
WBGene00001757	gst-9	13.708	0.741606	0.524597	1.41367	0.157459	0.330984
WBGene00001758	gst-10	447.309	-1.87011	0.163556	-11.434	2.82695e-30	4.57131e-28	2.10301	-2.10301	0.225928	-9.30831	1.29882e-20	2.5064e-19
WBGene00001759	gst-11	17.5435	-0.0715636	0.52713	-0.135761	0.89201	0.945296
WBGene00001760	gst-12	59.8925	-0.403034	0.269981	-1.49282	0.135484	0.297938
WBGene00001761	gst-13	672.996	-1.28346	0.162254	-7.91023	2.56908e-15	1.28295e-13	1.15554	-1.15554	0.28343	-4.07699	4.56218e-05	0.000131689
WBGene00001762	gst-14	29.0577	-0.236917	0.477349	-0.496318	0.61967	0.783424
WBGene00001763	gst-15	41.5027	-0.497693	0.330293	-1.50682	0.131857	0.292233
WBGene00001764	gst-16	49.0853	-0.946751	0.284194	-3.33136	0.000864242	0.00504263
WBGene00001767	gst-19	22.3526	0.195628	0.407393	0.480193	0.63109	0.792374
WBGene00001768	gst-20	435.662	0.244933	0.174449	1.40404	0.160306	0.334776	0.00187872	-0.00187872	0.259927	-0.00722787	0.994233	0.995491
WBGene00001769	gst-21	12.4416	-0.145038	0.54558	-0.265843	0.79036	0.890051
WBGene00001770	gst-22	285.294	-0.49374	0.191872	-2.57328	0.0100741	0.0402843	2.05576	-2.05576	0.285202	-7.20809	5.67438e-13	5.39612e-12
WBGene00001771	gst-23	13.1124	0.140801	0.517281	0.272195	0.785472	0.887077
WBGene00001772	gst-24	3662.88	-1.35204	0.166067	-8.14153	3.90321e-16	2.09724e-14	0.714321	-0.714321	0.163537	-4.36795	1.25421e-05	4.03715e-05
WBGene00001773	gst-25	23.9564	-0.318995	0.414333	-0.769901	0.441359	0.643578
WBGene00001774	gst-26	198.097	-1.2122	0.174454	-6.94855	3.69069e-12	1.19817e-10	1.80279	-1.80279	0.34085	-5.2891	1.22918e-07	5.63459e-07
WBGene00001775	gst-27	440.631	-0.955689	0.131846	-7.2485	4.21411e-13	1.56567e-11	2.17225	-2.17225	0.229206	-9.47729	2.60974e-21	5.30803e-20
WBGene00001776	gst-28	76.3806	-1.11389	0.278044	-4.00618	6.1709e-05	0.000513355	0.0770136	-0.0770136	0.729638	-0.10555	0.915939	0.928734
WBGene00001777	gst-29	31.9596	-0.292356	0.385227	-0.758919	0.447901	0.648883
WBGene00001778	gst-30	19.9462	-0.0605793	0.412515	-0.146854	0.883247	0.941207
WBGene00001779	gst-31	13.2148	0.619222	0.547295	1.13142	0.257877	0.46216
WBGene00001780	gst-32	27.7378	0.570904	0.362277	1.57588	0.115055	0.264811
WBGene00001781	gst-33	11.8729	-0.3022	0.607961	-0.497071	0.619139	0.78316
WBGene00001782	gst-34	33.1805	0.310575	0.359398	0.864153	0.387504	0.59699
WBGene00001783	gst-35	22.0868	0.431933	0.485491	0.889682	0.373637	0.584052
WBGene00001784	gst-36	181.089	-0.267783	0.207691	-1.28933	0.197283	0.385644	2.17602	-2.17602	0.326453	-6.66565	2.6349e-11	2.0519e-10
WBGene00001785	gst-37	14.1839	0.158827	0.618023	0.256992	0.797185	0.894321
WBGene00001786	gst-38	496.437	-4.2122	0.179334	-23.488	5.40695e-122	2.29512e-118	1.50738	-1.50738	0.323019	-4.66654	3.06312e-06	1.11427e-05
WBGene00001787	gst-39	66.9066	-0.23149	0.298118	-0.776504	0.437451	0.640339	2.16247	-2.16247	0.688047	-3.14292	0.00167273	0.0034483
WBGene00001788	gst-40	8.4794	-0.263327	0.638333	-0.412523	0.679956	1
WBGene00001789	gst-41	90.8179	-0.187126	0.240085	-0.779413	0.435736	0.639151	0.979973	-0.979973	0.591949	-1.6555	0.0978222	0.132416
WBGene00001790	gst-42	251.609	-0.287105	0.157957	-1.81762	0.0691222	0.18358	1.38438	-1.38438	0.321987	-4.2995	1.71185e-05	5.38322e-05
WBGene00001791	gst-43	132.762	-0.0671399	0.19227	-0.349196	0.726942	0.851694	-0.571416	0.571416	0.594451	0.961251	0.336426	0.392194
WBGene00001792	gst-44	53.6524	0.321117	0.304001	1.0563	0.290831	0.498086
WBGene00001793	gsy-1	353.048	-0.159804	0.203828	-0.784013	0.433032	0.636797	0.146248	-0.146248	0.345528	-0.423261	0.672105	0.715129
WBGene00001794	gta-1	1070.07	-0.447831	0.134365	-3.33295	0.000859312	0.0050242	2.08896	-2.08896	0.198381	-10.53	6.28092e-26	1.76222e-24
WBGene00001795	gtl-1	368.285	-0.00293924	0.150193	-0.0195698	0.984387	0.992127	1.25974	-1.25974	0.304414	-4.13825	3.49966e-05	0.000103357
WBGene00001796	gtl-2	144.658	0.505042	0.261177	1.93371	0.0531482	0.150803
WBGene00001803	lite-1	51.2799	0.504312	0.277041	1.82035	0.0687051	0.182613	1.74593	-1.74593	0.68361	-2.55399	0.0106497	0.0182897
WBGene00001804	gur-3	23.7533	-0.480946	0.562334	-0.855267	0.392403	0.601157
WBGene00001805	gur-4	33.234	0.360747	0.327368	1.10196	0.270478	0.476939
WBGene00001808	gut-2	404.244	-0.825215	0.180711	-4.56648	4.95983e-06	5.43734e-05	-1.0666	1.0666	0.329709	3.23497	0.00121656	0.00259376
WBGene00001811	haf-1	73.2903	0.542241	0.283751	1.91098	0.0560072	0.15687
WBGene00001812	haf-2	1092.36	-0.417219	0.107151	-3.89373	9.87128e-05	0.000774512	-1.08187	1.08187	0.233729	4.62874	3.67904e-06	1.31439e-05
WBGene00001813	haf-3	316.41	-0.53735	0.151292	-3.55174	0.000382689	0.00250699	-0.490961	0.490961	0.442111	1.11049	0.266787	0.320961
WBGene00001814	haf-4	351.365	0.155818	0.157331	0.990383	0.321987	0.531398	1.66681	-1.66681	0.272912	-6.10748	1.01218e-09	6.371e-09
WBGene00001815	hmt-1	339.803	-0.468358	0.204766	-2.28728	0.0221793	0.0757101	0.0574174	-0.0574174	0.297968	-0.192697	0.847197	0.871314
WBGene00001816	haf-6	183.066	-0.439291	0.232768	-1.88725	0.0591264	0.163376	0.513616	-0.513616	0.3916	-1.31158	0.18966	0.238
WBGene00001817	haf-7	119.33	0.432157	0.234871	1.83998	0.0657717	0.177007	1.44534	-1.44534	0.375939	-3.84462	0.000120739	0.000321212
WBGene00001819	haf-9	278.563	-1.02487	0.152833	-6.70584	2.00258e-11	5.92365e-10	1.83754	-1.83754	0.298649	-6.15285	7.61047e-10	4.89148e-09
WBGene00001820	ham-1	81.3596	0.0968621	0.355029	0.272829	0.784985	0.886722
WBGene00001821	ham-2	82.4668	0.362378	0.289032	1.25376	0.209929	0.403028	0.714447	-0.714447	0.761497	-0.938213	0.348135	0.404589
WBGene00001823	hap-1	105.273	-0.762758	0.212705	-3.58599	0.000335799	0.00224469	-0.185681	0.185681	0.599544	0.309703	0.756787	0.791658
WBGene00001824	hbl-1	105.461	0.229063	0.226151	1.01288	0.311118	0.519543	0.562743	-0.562743	0.61312	-0.917835	0.358705	0.415287
WBGene00001827	hcf-1	728.708	-0.335816	0.158569	-2.1178	0.0341923	0.107152	-1.52922	1.52922	0.303139	5.04463	4.54405e-07	1.91849e-06
WBGene00001828	hch-1	36.3501	-0.0621936	0.425752	-0.146079	0.883859	0.941588
WBGene00001829	hcp-1	1374.25	-0.709938	0.158322	-4.48413	7.32117e-06	7.75459e-05	-2.45381	2.45381	0.257595	9.52584	1.63719e-21	3.38211e-20
WBGene00001830	hcp-2	779.779	-0.511205	0.164553	-3.10663	0.00189233	0.00990135	-2.37421	2.37421	0.333034	7.12903	1.01082e-12	9.35953e-12
WBGene00001831	hcp-3	689.412	-0.678894	0.129339	-5.24895	1.52972e-07	2.30668e-06	-2.54977	2.54977	0.384697	6.62801	3.40236e-11	2.60343e-10
WBGene00001832	hcp-4	970.273	-0.895818	0.099279	-9.02324	1.82615e-19	1.20647e-17	-2.18082	2.18082	0.274335	7.94946	1.87323e-15	2.2456e-14
WBGene00001833	hcp-6	448.621	-0.431041	0.144214	-2.9889	0.00279984	0.0138113	-0.732847	0.732847	0.445611	1.64459	0.100055	0.135183
WBGene00001834	hda-1	825.196	-0.239506	0.167873	-1.42671	0.153665	0.325199	-2.56261	2.56261	0.279095	9.18185	4.23737e-20	7.76067e-19
WBGene00001835	hda-2	284.025	-0.368834	0.147965	-2.49271	0.0126771	0.0484677	-0.660871	0.660871	0.518164	1.27541	0.202165	0.25143
WBGene00001836	hda-3	419.947	-0.11229	0.187461	-0.599005	0.549169	0.730004	-2.07479	2.07479	0.410163	5.05845	4.22688e-07	1.79512e-06
WBGene00001837	hda-4	216.047	0.0881373	0.261998	0.336404	0.736566	0.857879	0.696997	-0.696997	0.471357	-1.4787	0.13922	0.18102
WBGene00001838	hda-10	302.36	-0.138517	0.206488	-0.670827	0.502331	0.694437	-1.70982	1.70982	0.443517	3.85515	0.00011566	0.000308529
WBGene00001839	hdl-1	12.9945	0.776545	0.540678	1.43624	0.150933	0.320898
WBGene00001840	hel-1	2381.95	-0.681885	0.0972575	-7.01113	2.36408e-12	7.88599e-11	-1.1495	1.1495	0.200449	5.73461	9.77352e-09	5.3183e-08
WBGene00001841	hen-1	30.5092	0.156813	0.404439	0.38773	0.698216	0.833627
WBGene00001842	her-1	30.7472	0.490394	0.384261	1.2762	0.201885	0.391034
WBGene00001843	hgo-1	580.978	0.110372	0.127169	0.867916	0.38544	0.594821	1.74491	-1.74491	0.191151	-9.12845	6.94867e-20	1.24666e-18
WBGene00001844	hid-1	125.483	0.272192	0.242053	1.12451	0.260796	0.465571	1.85266	-1.85266	0.457901	-4.04597	5.2106e-05	0.000148617
WBGene00001851	hif-1	536.066	-0.462819	0.122139	-3.78928	0.000151087	0.00111486	1.49437	-1.49437	0.235035	-6.35808	2.04294e-10	1.41415e-09
WBGene00001852	hil-1	37.0634	-0.0709294	0.468991	-0.151238	0.879788	0.939554
WBGene00001853	hil-2	222.959	0.384262	0.234631	1.63773	0.101478	0.242984	0.718625	-0.718625	0.376372	-1.90935	0.0562175	0.0806514
WBGene00001854	hil-3	52.2249	0.957815	0.312457	3.06543	0.00217359	0.0111328
WBGene00001855	hil-4	3465.29	-0.36913	0.219709	-1.68009	0.0929406	0.22804	-2.47991	2.47991	0.285243	8.69405	3.49755e-18	5.3629e-17
WBGene00001856	hil-5	1441.22	-0.509112	0.221629	-2.29714	0.0216109	0.0742627	-1.11326	1.11326	0.289613	3.84396	0.000121064	0.000321968
WBGene00001858	hil-7	28.2142	0.695971	0.396377	1.75583	0.0791175	0.202697
WBGene00001859	hil-8	27.2603	0.854831	0.375432	2.27692	0.0227907	0.0774121
WBGene00001860	him-1	944.646	-0.508037	0.128504	-3.95349	7.70203e-05	0.000627509	-1.44715	1.44715	0.308627	4.68899	2.74561e-06	1.00694e-05
WBGene00001862	him-3	571.838	-0.601836	0.124259	-4.84341	1.27631e-06	1.57948e-05	-1.73085	1.73085	0.289592	5.97685	2.27491e-09	1.36875e-08
WBGene00001863	him-4	697.038	-0.145983	0.125339	-1.16471	0.244136	0.445384	1.80277	-1.80277	0.256392	-7.03131	2.04605e-12	1.80071e-11
WBGene00001864	him-5	181.477	-1.26912	0.229174	-5.53779	3.06318e-08	5.16995e-07	-1.47131	1.47131	0.720319	2.04259	0.0410932	0.0609199
WBGene00001865	him-6	174.472	-0.540398	0.241987	-2.23317	0.0255379	0.0849045	-0.663891	0.663891	0.605604	1.09625	0.272971	0.327086
WBGene00001867	him-8	233.681	-1.13626	0.183788	-6.18243	6.31242e-10	1.45821e-08	-2.38431	2.38431	0.501121	4.75796	1.95558e-06	7.34689e-06
WBGene00001869	him-10	494.819	-0.922779	0.122432	-7.53705	4.80734e-14	2.03551e-12	-2.21989	2.21989	0.406199	5.46503	4.62835e-08	2.26186e-07
WBGene00001872	him-14	91.0455	-0.271944	0.243904	-1.11496	0.264867	0.470612
WBGene00001874	him-17	697.077	-0.381472	0.162509	-2.34739	0.0189052	0.0669012	-1.06545	1.06545	0.293063	3.63556	0.000277373	0.000683317
WBGene00001876	his-2	23.0341	0.639381	0.403703	1.58379	0.113242	0.262167
WBGene00001877	his-3	10.018	-0.152266	0.66636	-0.228504	0.819254	0.90634
WBGene00001880	his-6	31.9759	0.609534	0.372035	1.63838	0.101343	0.242798
WBGene00001882	his-8	7.72656	1.15313	0.736807	1.56504	0.117573	1
WBGene00001898	his-24	146.157	0.529527	0.194633	2.72065	0.00651543	0.0280304	0.125257	-0.125257	0.592778	-0.211306	0.832649	0.85892
WBGene00001906	his-32	26.3468	-0.389811	0.37942	-1.02739	0.304238	0.512512
WBGene00001909	his-35	667.946	-0.266556	0.157312	-1.69444	0.0901812	0.2234	0.957773	-0.957773	0.205883	-4.65202	3.28694e-06	1.18804e-05
WBGene00001910	C50F4.6	329.942	0.26234	0.150761	1.7401	0.0818409	0.207648	-0.830126	0.830126	0.479173	1.73241	0.0832002	0.114583
WBGene00001911	his-37	1354.02	0.397654	0.136335	2.91674	0.00353705	0.0168412	1.43063	-1.43063	0.156929	-9.11643	7.7641e-20	1.37734e-18
WBGene00001912	his-38	86.8053	0.582781	0.247746	2.35233	0.0186562	0.0661991	0.925619	-0.925619	0.529132	-1.74932	0.0802365	0.110849
WBGene00001914	his-40	63.3823	0.541714	0.235775	2.29759	0.021585	0.0742132
WBGene00001915	his-41	1170.81	0.0951885	0.132024	0.720992	0.470914	0.66926	1.72555	-1.72555	0.193869	-8.90061	5.55427e-19	9.27118e-18
WBGene00001922	his-48	45.5931	-0.533909	0.299983	-1.7798	0.075109	0.194937
WBGene00001931	his-57	7.17979	-0.940266	0.683415	-1.37583	0.168873	1
WBGene00001933	his-59	134.865	0.677117	0.277745	2.43791	0.0147726	0.0548848
WBGene00001934	his-60	130.663	-0.191084	0.282044	-0.677495	0.498092	0.691236
WBGene00001935	his-61	121.582	-0.048573	0.215206	-0.225705	0.821431	0.907658	-0.764281	0.764281	0.560288	1.36409	0.17254	0.218702
WBGene00001936	his-62	158.431	0.422143	0.206431	2.04496	0.0408587	0.123092	-2.06664	2.06664	0.551764	3.74551	0.000180028	0.000461115
WBGene00001937	his-63	35.4809	-0.806674	0.409328	-1.97073	0.0487549	0.141289
WBGene00001938	his-64	97.894	-0.565484	0.237072	-2.38528	0.0170661	0.0615475
WBGene00001941	his-67	64.5415	-0.10174	0.305561	-0.332963	0.739162	0.85937
WBGene00001942	his-68	290.162	-0.56762	0.176422	-3.2174	0.0012936	0.00711961	-2.47991	2.47991	0.444553	5.57844	2.42689e-08	1.23562e-07
WBGene00001944	his-70	19.9991	0.00620436	0.531445	0.0116745	0.990685	0.995199
WBGene00001945	his-71	79.7794	0.129568	0.269945	0.479979	0.631242	0.792507	1.64297	-1.64297	0.482299	-3.40654	0.000657919	0.00149153
WBGene00001946	his-72	1458.09	0.0641709	0.103665	0.619022	0.535902	0.720153	-1.36673	1.36673	0.228701	5.97606	2.28606e-09	1.37441e-08
WBGene00001948	hlh-1	47.0487	-0.232827	0.304678	-0.764173	0.444764	0.646546
WBGene00001949	hlh-2	89.1353	0.169026	0.26849	0.629542	0.528995	0.715339
WBGene00001950	hlh-3	35.364	0.631221	0.308581	2.04556	0.0407995	0.123025
WBGene00001951	hlh-4	7.86268	2.19013	0.705936	3.10245	0.00191923	1
WBGene00001952	hlh-6	30.4909	0.476133	0.400519	1.18879	0.234523	0.434191
WBGene00001953	hlh-8	7.5063	0.0458962	0.7113	0.0645244	0.948553	1
WBGene00001954	hlh-10	11.2521	0.838845	0.574272	1.46071	0.144095	0.31139
WBGene00001955	hlh-11	429.027	-0.552497	0.158157	-3.49334	0.000477012	0.00303	1.68802	-1.68802	0.268521	-6.28636	3.25e-10	2.20342e-09
WBGene00001956	hlh-12	9.53911	-0.00858891	0.598328	-0.0143548	0.988547	0.994089
WBGene00001957	hlh-13	5.88938	0.973323	0.775108	1.25573	0.209215	1
WBGene00001958	hlh-14	24.7467	1.05585	0.463201	2.27947	0.022639	0.0770471
WBGene00001963	btb-1	15.245	-0.208999	0.46138	-0.452988	0.650557	0.805382
WBGene00001965	hlh-26	17.552	0.536349	0.480875	1.11536	0.264696	0.470568
WBGene00001971	hmg-1.1	2110.9	-0.648398	0.117275	-5.52885	3.22333e-08	5.41334e-07	-0.800622	0.800622	0.163308	4.90254	9.46054e-07	3.75574e-06
WBGene00001972	hmg-1.2	438.709	-0.0844479	0.153355	-0.55067	0.58186	0.754152	0.207739	-0.207739	0.311916	-0.666008	0.505406	0.558176
WBGene00001973	hmg-3	1186.43	-1.26035	0.137922	-9.13815	6.35304e-20	4.31473e-18	-1.40496	1.40496	0.244851	5.73804	9.57803e-09	5.23352e-08
WBGene00001974	hmg-4	1426.38	-0.983227	0.202829	-4.84756	1.2499e-06	1.55018e-05	-1.80327	1.80327	0.310965	5.79894	6.67362e-09	3.7395e-08
WBGene00001975	hmg-5	461.189	-0.399279	0.139415	-2.86395	0.00418388	0.0193617	-1.63052	1.63052	0.346827	4.70124	2.5859e-06	9.53954e-06
WBGene00001976	hmg-11	119.962	0.810022	0.224673	3.60534	0.000311743	0.00210377	0.121094	-0.121094	0.651403	-0.185897	0.852525	0.875998
WBGene00001977	hmg-12	3402.47	-0.776623	0.102621	-7.56788	3.79366e-14	1.6307e-12	-2.5322	2.5322	0.228156	11.0986	1.27468e-28	4.2554e-27
WBGene00001978	hmp-1	809.492	-0.403141	0.126265	-3.19282	0.00140891	0.00767219	-1.48592	1.48592	0.257827	5.76323	8.25176e-09	4.56559e-08
WBGene00001979	hmp-2	568.216	-0.487192	0.218524	-2.22947	0.0257827	0.085539	-1.52027	1.52027	0.310928	4.88947	1.0111e-06	3.98796e-06
WBGene00001980	hmr-1	721.593	0.231287	0.240636	0.961149	0.336477	0.546626	-1.22562	1.22562	0.324152	3.78099	0.000156203	0.000406406
WBGene00001981	hnd-1	42.9115	0.690583	0.44139	1.56456	0.117685	0.269341
WBGene00001983	hoe-1	966.453	-0.153826	0.162612	-0.94597	0.344164	0.554575	-0.145264	0.145264	0.201493	0.720939	0.470947	0.525177
WBGene00001984	hog-1	10.3602	0.946415	0.570823	1.65798	0.0973208	0.235722
WBGene00001985	hop-1	327.893	-0.0479937	0.135094	-0.35526	0.722395	0.849395	-3.58245	3.58245	0.585361	6.12008	9.35293e-10	5.92477e-09
WBGene00001986	hot-1	31.5903	-0.587418	0.399224	-1.4714	0.141184	0.30684
WBGene00001987	hot-2	26.9911	-0.0779532	0.52876	-0.147426	0.882796	0.941207
WBGene00001988	hot-3	19.6046	0.404313	0.438702	0.921611	0.356732	0.567763
WBGene00001989	hot-4	18.1882	0.0078456	0.449684	0.0174469	0.98608	0.992981
WBGene00001990	hot-5	12.6817	0.368186	0.570944	0.644872	0.51901	0.707302
WBGene00001991	hot-6	31.1201	0.282519	0.370836	0.761844	0.446153	0.647622
WBGene00001992	hot-7	17.7635	-0.167324	0.512993	-0.326173	0.744294	0.861913
WBGene00001993	hpd-1	518.77	-0.348401	0.160143	-2.17556	0.0295884	0.0956584	2.21114	-2.21114	0.193301	-11.4389	2.67363e-30	9.74828e-29
WBGene00001994	hpk-1	705.257	0.13859	0.145354	0.953462	0.340356	0.550336	1.1553	-1.1553	0.224727	-5.1409	2.73425e-07	1.19588e-06
WBGene00001995	hpl-1	54.9694	-0.00779934	0.323527	-0.0241072	0.980767	0.990046
WBGene00001996	hpl-2	444.691	-0.812846	0.145033	-5.60456	2.08787e-08	3.64711e-07	-1.52289	1.52289	0.358372	4.24946	2.14284e-05	6.60981e-05
WBGene00001997	hpr-9	91.7733	-0.450073	0.234644	-1.91811	0.0550971	0.154857
WBGene00001998	hpr-17	244.951	-0.535498	0.159885	-3.34928	0.000810231	0.00478131	-3.24632	3.24632	0.570781	5.68751	1.28908e-08	6.84508e-08
WBGene00001999	hrp-1	1801.41	-0.556971	0.189345	-2.94157	0.00326552	0.0157381	-1.0371	1.0371	0.230691	4.49564	6.93619e-06	2.33926e-05
WBGene00002000	hrp-2	439.693	-0.333669	0.208283	-1.602	0.109155	0.255705	0.0258933	-0.0258933	0.300387	-0.0861999	0.931307	0.941903
WBGene00002001	hars-1	425.468	-0.380853	0.119101	-3.19774	0.00138507	0.00756176	0.154479	-0.154479	0.259738	-0.594748	0.552012	0.602749
WBGene00002002	hsb-1	279.774	0.0591163	0.152122	0.388612	0.697563	0.833329	-0.608435	0.608435	0.383429	1.58683	0.112552	0.149942
WBGene00002003	hse-5	356.813	-0.501538	0.175183	-2.86294	0.00419732	0.0194186	-1.41593	1.41593	0.425902	3.32453	0.000885663	0.001953
WBGene00002004	hsf-1	252.876	-0.164211	0.23614	-0.695395	0.486808	0.683069	-0.544618	0.544618	0.423685	1.28543	0.198642	0.2477
WBGene00002005	hsp-1	8200.27	-0.857246	0.115674	-7.41087	1.25471e-13	5.01265e-12	-0.216488	0.216488	0.132541	1.63337	0.102392	0.13787
WBGene00002007	hsp-3	1969.1	0.722554	0.0993515	7.27271	3.52357e-13	1.32948e-11	1.87944	-1.87944	0.174763	-10.7542	5.65973e-27	1.6962e-25
WBGene00002008	hsp-4	1182.43	0.0350088	0.142486	0.2457	0.805914	0.89916	-0.939286	0.939286	0.250737	3.7461	0.000179608	0.000460186
WBGene00002010	hsp-6	974.635	-0.599852	0.212426	-2.82381	0.00474562	0.0215674	-0.692445	0.692445	0.248686	2.78442	0.0053624	0.0098783
WBGene00002011	hsp-12.2	96.1921	-0.8638	0.240078	-3.598	0.000320677	0.00215124	1.01328	-1.01328	0.636494	-1.59198	0.11139	0.14862
WBGene00002012	hsp-12.3	32.5847	-0.39179	0.340374	-1.15106	0.249708	0.452438
WBGene00002013	hsp-12.6	7.73217	0.998625	0.836855	1.19331	0.232749	1
WBGene00002016	hsp-16.2	70.1284	4.87923	0.432318	11.2862	1.53552e-29	2.22834e-27
WBGene00002018	hsp-16.41	143.037	4.27893	0.306359	13.967	2.47782e-44	1.23738e-41
WBGene00002021	hsp-17	393.256	-0.268068	0.201707	-1.329	0.183849	0.367744	0.64142	-0.64142	0.350585	-1.82957	0.0673142	0.0947837
WBGene00002023	hsp-25	456.361	-0.70188	0.123784	-5.67021	1.42626e-08	2.56259e-07	1.33129	-1.33129	0.277416	-4.79889	1.59549e-06	6.09832e-06
WBGene00002024	hsp-43	479.449	0.634097	0.16338	3.88112	0.000103977	0.000810197	1.2915	-1.2915	0.210654	-6.13091	8.7377e-10	5.57072e-09
WBGene00002025	hsp-60	741.416	-0.380881	0.234127	-1.62681	0.103777	0.246783	0.184146	-0.184146	0.266314	-0.691461	0.489276	0.542124
WBGene00002026	hsp-70	56.0742	2.49437	0.313308	7.96141	1.7009e-15	8.62076e-14
WBGene00002027	hsr-9	1540.49	-0.451043	0.135	-3.34105	0.000834612	0.00489495	-1.93568	1.93568	0.276008	7.01315	2.33013e-12	2.03713e-11
WBGene00002028	hst-1	224.717	-0.502204	0.163406	-3.07335	0.00211668	0.0108939	-0.531003	0.531003	0.463232	1.1463	0.251671	0.305168
WBGene00002029	hst-2	87.0972	-0.319016	0.239514	-1.33193	0.182882	0.366347	-0.747971	0.747971	0.598248	1.25027	0.211202	0.261466
WBGene00002030	hst-3.1	8.69235	-0.15447	0.762894	-0.202479	0.839542	0.91752
WBGene00002031	hst-6	55.5891	0.0705279	0.296513	0.237858	0.811992	0.902691
WBGene00002032	htp-1	430.796	-0.748352	0.168797	-4.43344	9.27422e-06	9.50887e-05	-1.35231	1.35231	0.379748	3.56107	0.000369346	0.00088473
WBGene00002033	htp-2	257.869	-0.545734	0.176924	-3.08456	0.00203855	0.0105365	-1.27078	1.27078	0.386341	3.28927	0.00100449	0.00218699
WBGene00002034	htp-3	453.363	-0.614928	0.164989	-3.72709	0.000193705	0.00138773	-2.19489	2.19489	0.361476	6.072	1.26326e-09	7.87e-09
WBGene00002035	hum-1	724.832	-0.194658	0.150729	-1.29145	0.196549	0.384933	-0.894976	0.894976	0.294323	3.0408	0.00235952	0.00472501
WBGene00002036	hum-2	1421.91	0.047247	0.141622	0.333613	0.738671	0.85911	-1.22656	1.22656	0.208337	5.88739	3.92332e-09	2.27242e-08
WBGene00002037	hum-4	273.185	-0.515717	0.207534	-2.48498	0.012956	0.0493892	0.324057	-0.324057	0.429071	-0.755251	0.450098	0.504988
WBGene00002038	hum-5	684.977	-0.462543	0.150366	-3.07612	0.00209716	0.0108033	1.68923	-1.68923	0.259636	-6.50616	7.70948e-11	5.60123e-10
WBGene00002039	hum-6	175.075	0.103424	0.237336	0.435772	0.663002	0.813533	0.989771	-0.989771	0.409516	-2.41693	0.015652	0.0257569
WBGene00002040	hum-7	105.076	0.216741	0.22052	0.982864	0.325675	0.535565	0.910994	-0.910994	0.572177	-1.59216	0.11135	0.148592
WBGene00002041	hum-8	267.5	-0.457518	0.184153	-2.48445	0.0129751	0.0494399	1.79945	-1.79945	0.335712	-5.36009	8.31815e-08	3.89427e-07
WBGene00002042	hus-1	124.287	-0.7104	0.201129	-3.53206	0.000412331	0.00267519
WBGene00002043	hyl-1	381.773	0.123989	0.166194	0.74605	0.455637	0.655932	-0.771696	0.771696	0.29585	2.60841	0.00909649	0.0158283
WBGene00002044	hyl-2	162.795	0.458533	0.230553	1.98884	0.0467192	0.136608	2.17383	-2.17383	0.484182	-4.4897	7.1325e-06	2.40036e-05
WBGene00002045	icd-1	3619.41	-0.894367	0.0966209	-9.25645	2.11338e-20	1.52694e-18	-0.367637	0.367637	0.141018	2.60702	0.00913346	0.0158822
WBGene00002046	icln-1	315.271	-0.754192	0.13856	-5.44305	5.23748e-08	8.51793e-07	-0.545661	0.545661	0.369988	1.47481	0.140264	0.182166
WBGene00002047	icp-1	556.75	-0.628623	0.162596	-3.86617	0.000110557	0.000855585	-2.0739	2.0739	0.384535	5.39327	6.91884e-08	3.27599e-07
WBGene00002048	ida-1	104.497	-0.207816	0.195405	-1.06351	0.287549	0.494625	0.752324	-0.752324	0.519674	-1.44768	0.147705	0.190582
WBGene00002050	ifa-1	188.496	-0.155436	0.179211	-0.867334	0.385759	0.595058	1.51142	-1.51142	0.306062	-4.93827	7.88167e-07	3.17353e-06
WBGene00002051	ifa-3	9.70192	0.037419	0.698366	0.0535809	0.957269	0.979601
WBGene00002052	ifa-4	180.631	-0.322414	0.170236	-1.89393	0.0582348	0.161353	1.08986	-1.08986	0.539557	-2.01992	0.0433915	0.0640631
WBGene00002053	ifb-1	474.486	0.27116	0.143724	1.88668	0.0592034	0.163529	1.74303	-1.74303	0.271451	-6.42115	1.35251e-10	9.57162e-10
WBGene00002054	ifb-2	575.703	-1.02737	0.146558	-7.00998	2.38353e-12	7.93527e-11	1.52993	-1.52993	0.224342	-6.81962	9.12801e-12	7.49179e-11
WBGene00002055	ifc-1	124.203	-1.065	0.664852	-1.60186	0.109187	0.255744	0.811345	-0.811345	0.693519	-1.1699	0.242043	0.294846
WBGene00002056	ifc-2	2028.47	-1.03708	0.142733	-7.26586	3.70679e-13	1.38935e-11	1.36203	-1.36203	0.151172	-9.0098	2.06424e-19	3.52748e-18
WBGene00002057	ifd-1	83.0764	-0.310193	0.238497	-1.30062	0.193389	0.380967	1.69068	-1.69068	0.602463	-2.80628	0.00501164	0.00930801
WBGene00002058	ifd-2	164.318	0.0553942	0.198657	0.278843	0.780365	0.883927	1.30702	-1.30702	0.414163	-3.1558	0.00160059	0.00331254
WBGene00002059	ife-1	1826.63	-0.917425	0.0957065	-9.58582	9.17295e-22	7.48786e-20	-0.511535	0.511535	0.172726	2.96154	0.00306109	0.00596977
WBGene00002060	ife-2	214.776	0.112504	0.170428	0.660129	0.509171	0.699677	0.633978	-0.633978	0.404733	-1.56641	0.117252	0.155446
WBGene00002061	ife-3	1056.76	-1.00695	0.127919	-7.87179	3.49605e-15	1.70084e-13	-2.12094	2.12094	0.272363	7.78719	6.85154e-15	7.75528e-14
WBGene00002062	ife-4	38.8805	0.047291	0.371367	0.127343	0.898669	0.949207
WBGene00002063	ife-5	70.6888	-1.24144	0.296929	-4.18095	2.90292e-05	0.000262453
WBGene00002064	iff-1	2801.47	-1.24066	0.0961355	-12.9053	4.20194e-38	1.20923e-35	-1.52618	1.52618	0.176104	8.66632	4.46303e-18	6.76466e-17
WBGene00002065	iff-2	1763.86	-0.536709	0.129826	-4.13407	3.56399e-05	0.000315665	1.98398	-1.98398	0.154788	-12.8175	1.30928e-37	6.90599e-36
WBGene00002066	ifg-1	1642.21	-0.80929	0.105834	-7.64675	2.06125e-14	9.16178e-13	0.0302217	-0.0302217	0.170758	-0.176986	0.85952	0.882268
WBGene00002067	ifp-1	123.185	0.341361	0.312651	1.09183	0.274909	0.481352
WBGene00002068	ify-1	1744.61	-0.600929	0.139604	-4.30453	1.6734e-05	0.00016107	-2.58803	2.58803	0.293528	8.817	1.1757e-18	1.89453e-17
WBGene00002069	ikb-1	82.9589	0.124191	0.280778	0.442309	0.658266	0.810082	1.48143	-1.48143	0.583746	-2.5378	0.0111553	0.0190545
WBGene00002070	ile-1	859.472	0.0370075	0.137127	0.269877	0.787255	0.887952	-1.24906	1.24906	0.237561	5.25783	1.45765e-07	6.62051e-07
WBGene00002071	ile-2	151.792	0.129303	0.177794	0.727262	0.467065	0.6658	0.794129	-0.794129	0.441381	-1.79919	0.0719886	0.100685
WBGene00002072	ima-1	699.015	-0.127019	0.121945	-1.0416	0.297596	0.505238	-1.97096	1.97096	0.29796	6.61484	3.71943e-11	2.82963e-10
WBGene00002073	ima-2	3257.38	-0.648446	0.137937	-4.70101	2.58874e-06	3.01262e-05	-2.81239	2.81239	0.292459	9.61636	6.82041e-22	1.44673e-20
WBGene00002074	ima-3	917.13	-0.681462	0.164223	-4.14962	3.33032e-05	0.000296671	-0.513596	0.513596	0.202696	2.53383	0.0112825	0.0192303
WBGene00002075	imb-1	516.67	-0.207984	0.203194	-1.02357	0.306037	0.514403	-1.42735	1.42735	0.309459	4.61238	3.9808e-06	1.40859e-05
WBGene00002076	imb-2	497.675	-0.537796	0.180026	-2.98733	0.00281422	0.0138661	-1.1234	1.1234	0.344459	3.26134	0.00110889	0.00238995
WBGene00002077	imb-3	3611.27	-0.804223	0.173554	-4.63384	3.58948e-06	4.06576e-05	-0.903873	0.903873	0.153368	5.8935	3.78096e-09	2.19801e-08
WBGene00002078	xpo-1	1195.24	-0.197146	0.217905	-0.904733	0.365607	0.577025	-0.881247	0.881247	0.199785	4.41097	1.02907e-05	3.36864e-05
WBGene00002079	xpo-2	1233.92	-0.302392	0.200389	-1.50902	0.131292	0.291248	-1.83273	1.83273	0.276231	6.6348	3.24947e-11	2.49853e-10
WBGene00002080	xpo-3	500.167	-0.248764	0.208583	-1.19264	0.233011	0.432289	-0.975208	0.975208	0.36943	2.63977	0.00829631	0.0145738
WBGene00002081	ina-1	217.11	0.40478	0.187302	2.16111	0.0306871	0.0985317	0.872549	-0.872549	0.344337	-2.534	0.0112769	0.0192249
WBGene00002083	inf-1	1615.44	-0.854726	0.164514	-5.19545	2.04228e-07	2.97646e-06	0.462496	-0.462496	0.161999	-2.85493	0.00430464	0.00812072
WBGene00002085	ins-2	7.84463	0.729828	0.749876	0.973264	0.330422	1
WBGene00002086	ins-3	28.3344	-0.748905	0.382638	-1.95721	0.0503223	0.144481
WBGene00002087	ins-4	11.8508	-0.17172	0.566478	-0.303136	0.761786	0.872588
WBGene00002088	ins-5	40.7565	-0.399652	0.320323	-1.24766	0.212157	0.405975
WBGene00002089	ins-6	77.9002	-0.730803	0.276417	-2.64384	0.00819705	0.0338467	0.270564	-0.270564	0.595389	-0.454432	0.649518	0.694176
WBGene00002090	ins-7	217.433	1.53999	0.194103	7.93391	2.1236e-15	1.06993e-13	2.01402	-2.01402	0.428527	-4.69988	2.60319e-06	9.59761e-06
WBGene00002092	ins-9	8.43253	-0.371633	0.665996	-0.558011	0.576837	1
WBGene00002094	ins-11	6.51068	0.408694	0.94025	0.434665	0.663805	1
WBGene00002100	ins-17	94.1917	-0.00421958	0.273538	-0.0154259	0.987692	0.993662
WBGene00002101	ins-18	13.9182	0.718185	0.647686	1.10885	0.267496	0.473451
WBGene00002105	ins-22	10.6375	-0.649957	0.570086	-1.1401	0.254243	0.457723
WBGene00002106	ins-23	10.0878	-0.629193	0.634586	-0.991501	0.321441	0.530754
WBGene00002107	ins-24	48.5886	-0.498172	0.3833	-1.29969	0.193707	0.381327
WBGene00002109	ins-26	48.8216	-0.827708	0.287892	-2.87506	0.00403947	0.0187856
WBGene00002110	ins-27	34.0986	-0.426481	0.346937	-1.22928	0.218969	0.414432
WBGene00002111	ins-28	44.4231	0.0566573	0.33578	0.168734	0.866006	0.933286
WBGene00002112	ins-29	15.1547	-0.515835	0.542454	-0.95093	0.34164	0.551675
WBGene00002113	ins-30	81.6597	-0.523458	0.240177	-2.17946	0.0292973	0.0949677	-0.265099	0.265099	0.683065	0.388103	0.69794	0.738545
WBGene00002116	ins-33	39.899	-1.26874	0.33271	-3.81336	0.000137091	0.00102405
WBGene00002117	ins-34	45.7644	0.0966289	0.342015	0.282528	0.777539	0.88202
WBGene00002118	ins-35	11.5011	0.532882	0.579409	0.9197	0.35773	0.568765
WBGene00002119	ins-36	8.38386	-0.315032	0.604359	-0.521266	0.602181	1
WBGene00002120	ins-37	18.2718	1.72886	0.492639	3.50938	0.00044916	0.00287944
WBGene00002123	inx-1	49.099	0.219409	0.302986	0.724155	0.468971	0.667276
WBGene00002124	inx-2	152.685	0.516879	0.228205	2.26498	0.0235139	0.079404
WBGene00002125	inx-3	175.92	0.528501	0.20022	2.6396	0.00830045	0.0341988	-2.26032	2.26032	0.681203	3.31813	0.000906215	0.00199166
WBGene00002127	inx-5	189.66	-0.00299852	0.190275	-0.0157589	0.987427	0.993487	1.04664	-1.04664	0.397859	-2.63068	0.00852155	0.0149132
WBGene00002128	inx-6	39.7562	-0.00692128	0.413152	-0.0167524	0.986634	0.993148
WBGene00002129	inx-7	233.084	0.184472	0.193995	0.950912	0.341649	0.551675	-1.61396	1.61396	0.450327	3.58397	0.000338405	0.000817544
WBGene00002130	inx-8	1090.98	0.301093	0.160372	1.87747	0.0604542	0.166146	1.47785	-1.47785	0.214807	-6.87991	5.98885e-12	4.98776e-11
WBGene00002131	inx-9	298.296	1.35407	0.176896	7.65463	1.93868e-14	8.68519e-13	1.20549	-1.20549	0.325206	-3.70685	0.000209849	0.000529728
WBGene00002132	inx-10	64.1414	-0.122298	0.294521	-0.415242	0.677965	0.821581	0.122243	-0.122243	0.540836	-0.226026	0.821181	0.848972
WBGene00002133	inx-11	86.343	0.195079	0.222185	0.878002	0.379942	0.590268
WBGene00002134	inx-12	261.48	0.284906	0.142154	2.0042	0.0450486	0.132976	1.54047	-1.54047	0.285187	-5.40162	6.60417e-08	3.14393e-07
WBGene00002135	inx-13	256.462	-0.0647734	0.177932	-0.364035	0.715832	0.845141	1.15093	-1.15093	0.313172	-3.67507	0.00023778	0.000593475
WBGene00002136	inx-14	1047.22	-0.242543	0.185895	-1.30473	0.191985	0.379061	-2.65815	2.65815	0.311548	8.53208	1.43737e-17	2.11778e-16
WBGene00002137	inx-15	187.875	-0.207291	0.201276	-1.02989	0.303063	0.511502	2.51448	-2.51448	0.363721	-6.91321	4.73807e-12	3.98845e-11
WBGene00002138	inx-16	58.3438	-0.422925	0.285775	-1.47992	0.138894	0.30347
WBGene00002139	inx-17	118.069	-0.210615	0.242287	-0.869276	0.384696	0.594174	2.06161	-2.06161	0.490947	-4.19925	2.67801e-05	8.10264e-05
WBGene00002140	inx-18	39.3402	0.459823	0.341522	1.34639	0.178175	0.359847
WBGene00002141	inx-19	41.4091	0.587082	0.325222	1.80517	0.0710475	0.187287
WBGene00002142	inx-20	34.5296	0.385326	0.446855	0.862305	0.38852	0.597698
WBGene00002143	inx-21	371.914	-0.247246	0.192871	-1.28192	0.19987	0.388594	-2.29432	2.29432	0.553167	4.14761	3.35971e-05	9.96327e-05
WBGene00002144	inx-22	655.248	-0.120156	0.154155	-0.779453	0.435713	0.639151	-2.75687	2.75687	0.414717	6.64759	2.97939e-11	2.31107e-10
WBGene00002146	ipp-5	104.757	-0.0623124	0.231376	-0.269312	0.787689	0.88806	1.54324	-1.54324	0.633461	-2.43621	0.0148421	0.024603
WBGene00002147	ire-1	623.213	-0.276949	0.133241	-2.07855	0.0376588	0.115936	-0.573819	0.573819	0.309105	1.85639	0.0633983	0.0898293
WBGene00002148	gon-14	473.718	-0.325514	0.192367	-1.69215	0.0906181	0.224103	-1.57008	1.57008	0.330966	4.74392	2.09617e-06	7.83415e-06
WBGene00002149	irk-1	102.816	0.389827	0.250052	1.55898	0.119	0.271793
WBGene00002150	irk-2	77.3308	0.26002	0.260325	0.998829	0.317878	0.526766
WBGene00002151	irk-3	28.4208	-0.228795	0.485116	-0.47163	0.637191	0.79609
WBGene00002152	iars-1	966.773	-0.41495	0.122073	-3.39921	0.000675814	0.00407987	0.385711	-0.385711	0.237348	-1.62509	0.104144	0.139897
WBGene00002153	iars-2	284.222	-1.31026	0.142825	-9.1739	4.56217e-20	3.14882e-18	-0.688789	0.688789	0.45621	1.50981	0.131093	0.171894
WBGene00002162	isp-1	1847.48	-0.58501	0.105187	-5.5616	2.67306e-08	4.5614e-07	0.777163	-0.777163	0.158798	-4.89403	9.87937e-07	3.90243e-06
WBGene00002163	ist-1	99.371	0.109789	0.306463	0.358247	0.720158	0.848291
WBGene00002169	isw-1	1027.77	-0.291139	0.156787	-1.85691	0.0633247	0.17197	-2.22428	2.22428	0.280492	7.92994	2.19259e-15	2.60087e-14
WBGene00002173	itr-1	547.772	0.0227538	0.129772	0.175337	0.860815	0.930671	1.57932	-1.57932	0.243248	-6.49263	8.43526e-11	6.0894e-10
WBGene00002174	itx-1	422.084	0.00992468	0.153817	0.0645228	0.948554	0.975126	1.80379	-1.80379	0.314277	-5.73947	9.49724e-09	5.19655e-08
WBGene00002175	jac-1	88.2081	0.455996	0.308135	1.47986	0.138911	0.30347	1.01689	-1.01689	0.571443	-1.77951	0.0751559	0.10445
WBGene00002176	jip-1	76.197	0.341352	0.257583	1.32521	0.185101	0.369224
WBGene00002177	jkk-1	22.8584	-0.0133666	0.462428	-0.0289053	0.97694	0.988526
WBGene00002178	jnk-1	47.5561	-0.290262	0.367996	-0.788763	0.430251	0.63437
WBGene00002179	jph-1	120.831	-0.503681	0.244573	-2.05943	0.0394531	0.120091	1.99726	-1.99726	0.544058	-3.67105	0.000241557	0.000602141
WBGene00002180	jtr-1	128.225	-0.700463	0.237382	-2.95078	0.00316969	0.0153503	-1.18151	1.18151	0.560381	2.10841	0.0349956	0.0528306
WBGene00002181	kal-1	41.1124	-0.149979	0.324149	-0.462685	0.64359	0.800743
WBGene00002182	kap-1	24.9585	-0.295385	0.46336	-0.637485	0.523809	0.710818
WBGene00002183	kat-1	425.067	-0.566904	0.175245	-3.23493	0.00121674	0.00674909	1.06093	-1.06093	0.267971	-3.95913	7.52224e-05	0.000208316
WBGene00002184	kel-1	61.0257	0.174535	0.373657	0.4671	0.640428	0.799135
WBGene00002185	kel-3	452.923	-0.46733	0.133489	-3.5009	0.000463689	0.00295547	-0.967791	0.967791	0.326861	2.96087	0.00306774	0.00597978
WBGene00002186	kel-10	20.1601	0.762678	0.572107	1.3331	0.182497	0.365764
WBGene00002187	kgb-1	137.977	0.055107	0.207491	0.265588	0.790557	0.890051	1.351	-1.351	0.481937	-2.80328	0.00505854	0.00937969
WBGene00002188	kgb-2	51.1595	-0.155145	0.280817	-0.552475	0.580623	0.753627
WBGene00002189	kin-1	218.541	0.128514	0.234397	0.548275	0.583503	0.75534	1.27622	-1.27622	0.351068	-3.63526	0.0002777	0.000683836
WBGene00002190	kin-2	439.514	-0.230323	0.159505	-1.44398	0.148744	0.317956	1.39834	-1.39834	0.224902	-6.21755	5.04988e-10	3.32401e-09
WBGene00002191	kin-3	861.573	-0.0987201	0.137617	-0.717356	0.473154	0.67128	0.0133115	-0.0133115	0.247848	-0.0537082	0.957168	0.964667
WBGene00002192	kin-4	964.594	0.148545	0.199626	0.744115	0.456807	0.656877	-1.02919	1.02919	0.209322	4.91678	8.79799e-07	3.51177e-06
WBGene00002193	kin-5	27.7416	0.279778	0.444261	0.629761	0.528851	0.715259
WBGene00002194	kin-6	19.1871	0.54734	0.525801	1.04096	0.297892	0.505538
WBGene00002195	kin-9	100.012	0.642724	0.365533	1.75832	0.0786932	0.202077
WBGene00002196	kin-10	1388.58	-0.473521	0.131315	-3.60599	0.000310962	0.00209933	-0.593749	0.593749	0.188091	3.15671	0.00159562	0.00330313
WBGene00002198	kin-14	93.4121	0.126328	0.219675	0.575065	0.565247	0.741679
WBGene00002199	kin-15	35.1047	-0.536176	0.342549	-1.56525	0.117523	0.269107
WBGene00002200	kin-16	49.0464	-0.126642	0.349717	-0.362127	0.717257	0.846245
WBGene00002201	kin-18	1152.68	-0.394406	0.107035	-3.68485	0.000228837	0.00160688	-1.02277	1.02277	0.278417	3.6735	0.000239246	0.000596758
WBGene00002202	kin-19	1082.77	-0.273618	0.136744	-2.00096	0.045397	0.133703	0.0671827	-0.0671827	0.179749	-0.373759	0.708584	0.7481
WBGene00002203	kin-20	62.0446	-0.150341	0.26064	-0.576815	0.564065	0.740643
WBGene00002204	kin-21	5.77717	0.269334	0.779353	0.345586	0.729654	1
WBGene00002205	kin-23	6.85332	-0.798772	0.799034	-0.999672	0.317469	1
WBGene00002206	kin-24	17.6686	0.196653	0.476057	0.413088	0.679542	0.822201
WBGene00002207	sid-3	395.027	-0.446561	0.188577	-2.36806	0.0178815	0.0640123	1.35252	-1.35252	0.26284	-5.14577	2.6643e-07	1.16722e-06
WBGene00002208	kin-26	28.736	0.282721	0.438186	0.645209	0.518792	0.707118
WBGene00002210	kin-29	187.631	0.00502661	0.221323	0.0227117	0.98188	0.990397	1.67946	-1.67946	0.376284	-4.46327	8.07185e-06	2.68903e-05
WBGene00002211	kin-30	64.8821	0.345643	0.392224	0.881238	0.378189	0.588349
WBGene00002212	kin-31	36.7354	-0.383381	0.513638	-0.746404	0.455424	0.655753
WBGene00002213	kin-32	57.7781	0.237868	0.266014	0.894192	0.371219	0.582041
WBGene00002214	klc-1	815.85	-0.936501	0.130454	-7.1788	7.03239e-13	2.5459e-11	-2.34114	2.34114	0.358918	6.52275	6.90278e-11	5.03827e-10
WBGene00002215	klc-2	281.166	0.36729	0.152694	2.4054	0.0161547	0.0587891	1.0819	-1.0819	0.367542	-2.94362	0.00324395	0.00627534
WBGene00002216	klp-3	97.5665	-0.211917	0.233103	-0.909114	0.36329	0.574638	1.672	-1.672	0.652885	-2.56094	0.0104389	0.0179588
WBGene00002217	klp-4	322.815	0.379267	0.170718	2.2216	0.0263106	0.086912	1.88849	-1.88849	0.261964	-7.20896	5.63788e-13	5.37433e-12
WBGene00002218	klp-6	22.5344	0.512278	0.423723	1.20899	0.226667	0.424481
WBGene00002219	klp-7	1012.07	-0.335556	0.191951	-1.74814	0.0804405	0.205302	-1.46271	1.46271	0.290041	5.04314	4.57965e-07	1.93249e-06
WBGene00002220	gcc-1	138.226	0.373562	0.209059	1.78687	0.0739583	0.192864	0.376129	-0.376129	0.584259	-0.64377	0.519724	0.572073
WBGene00002221	klp-10	304.19	-1.0378	0.221858	-4.67777	2.90012e-06	3.3543e-05	-1.82998	1.82998	0.435005	4.20681	2.59003e-05	7.8635e-05
WBGene00002222	klp-11	62.7994	0.604329	0.36422	1.65924	0.0970671	0.235275
WBGene00002223	klp-12	1067.13	-0.639268	0.135634	-4.71318	2.43885e-06	2.84992e-05	-0.17351	0.17351	0.202843	0.855391	0.392335	0.448901
WBGene00002224	klp-13	72.5053	0.0700809	0.361786	0.193708	0.846404	0.921737
WBGene00002225	klp-15	1745.71	-0.470341	0.234073	-2.00938	0.0444968	0.131852	-2.74371	2.74371	0.310159	8.84614	9.06001e-19	1.48105e-17
WBGene00002226	klp-16	1655.81	-0.222336	0.368134	-0.603954	0.545874	0.72779	-2.7713	2.7713	0.656019	4.22442	2.39561e-05	7.32382e-05
WBGene00002227	klp-17	35.4116	0.533308	0.495399	1.07652	0.281694	0.48825
WBGene00002228	klp-18	739.908	-0.358699	0.200721	-1.78705	0.0739291	0.192818	-2.14165	2.14165	0.356657	6.0048	1.91568e-09	1.16681e-08
WBGene00002229	klp-19	3021.55	-0.547876	0.17801	-3.07778	0.00208546	0.0107479	-2.78269	2.78269	0.292573	9.5111	1.88664e-21	3.87717e-20
WBGene00002230	klp-20	59.886	-0.666651	0.332785	-2.00325	0.0451505	0.133254
WBGene00002231	knl-1	589.049	-0.287757	0.156402	-1.83985	0.0657902	0.177029	-1.62773	1.62773	0.374425	4.34727	1.3784e-05	4.40822e-05
WBGene00002232	kpc-1	251.411	0.148617	0.241069	0.616491	0.53757	0.721306	1.32582	-1.32582	0.474366	-2.79494	0.00519096	0.00958928
WBGene00002233	kqt-1	53.86	0.448671	0.443411	1.01186	0.311604	0.520075
WBGene00002234	kqt-2	132.183	0.418249	0.247806	1.6878	0.0914487	0.225389	1.5282	-1.5282	0.390423	-3.91422	9.06966e-05	0.000247189
WBGene00002235	kqt-3	79.2708	0.0567528	0.35868	0.158227	0.874278	0.937047	0.949918	-0.949918	0.688534	-1.37962	0.167703	0.213105
WBGene00002238	kars-1	1955.84	-0.578608	0.14462	-4.00088	6.31068e-05	0.0005237	-0.308279	0.308279	0.177897	1.73291	0.0831125	0.114482
WBGene00002239	ksr-1	105.87	0.111719	0.194628	0.574011	0.56596	0.742209	1.29196	-1.29196	0.487199	-2.65181	0.00800623	0.014127
WBGene00002240	ksr-2	364.913	-0.152074	0.183417	-0.829115	0.407039	0.613634	-0.970888	0.970888	0.380329	2.55276	0.0106873	0.0183383
WBGene00002241	kup-1	683.42	-0.920656	0.157421	-5.84838	4.96396e-09	9.80036e-08	-1.71604	1.71604	0.348246	4.92767	8.32157e-07	3.33876e-06
WBGene00002242	kvs-1	22.8745	0.406525	0.395906	1.02682	0.304504	0.512862
WBGene00002243	lad-2	44.288	0.657095	0.367613	1.78747	0.0738622	0.192725
WBGene00002244	laf-1	451.976	-0.761195	0.148837	-5.11429	3.14919e-07	4.44842e-06	0.263696	-0.263696	0.297803	-0.88547	0.375903	0.432603
WBGene00002245	lag-1	360.342	-0.366119	0.198287	-1.84641	0.0648329	0.175036	-1.85429	1.85429	0.377902	4.90681	9.25706e-07	3.6805e-06
WBGene00002246	lag-2	12.0968	0.287042	0.588093	0.48809	0.625486	0.787843
WBGene00002247	lam-1	441.118	0.364227	0.188868	1.92847	0.0537964	0.152108	1.17279	-1.17279	0.308189	-3.80542	0.000141565	0.000371742
WBGene00002248	lam-3	233.022	0.192621	0.218427	0.881855	0.377855	0.588248	-0.326962	0.326962	0.521369	0.627123	0.530579	0.582561
WBGene00002249	lap-1	1008.28	-0.372563	0.121702	-3.06129	0.00220389	0.0112642	-0.32889	0.32889	0.210812	1.56011	0.118735	0.157353
WBGene00002250	lap-2	1582.53	-0.594138	0.133773	-4.44138	8.93821e-06	9.22004e-05	-0.404086	0.404086	0.151266	2.67136	0.00755443	0.0134165
WBGene00002251	lat-1	714.869	0.145266	0.22291	0.651679	0.514608	0.704072	-1.27546	1.27546	0.253021	5.04094	4.6324e-07	1.94955e-06
WBGene00002252	lat-2	117.49	0.371655	0.320956	1.15796	0.24688	0.44875	1.30951	-1.30951	0.629169	-2.08133	0.037404	0.0560918
WBGene00002253	lbp-1	774.383	0.920915	0.183468	5.01948	5.18124e-07	6.98747e-06	1.19899	-1.19899	0.284233	-4.21834	2.46103e-05	7.5025e-05
WBGene00002254	lbp-2	13751.1	0.224348	0.174266	1.28738	0.197961	0.386342	1.90765	-1.90765	0.155622	-12.2582	1.51745e-34	6.93993e-33
WBGene00002255	lbp-3	1244.01	0.0182945	0.171226	0.106844	0.914913	0.959145	1.92383	-1.92383	0.187424	-10.2646	1.01734e-24	2.61338e-23
WBGene00002256	lbp-4	171.934	-0.275704	0.186794	-1.47598	0.139949	0.305171	-1.04629	1.04629	0.565122	1.85144	0.0641066	0.0906868
WBGene00002257	lbp-5	205.763	-1.18508	0.232088	-5.10618	3.28729e-07	4.61662e-06	2.48183	-2.48183	0.525272	-4.72484	2.30295e-06	8.57051e-06
WBGene00002258	lbp-6	545.879	-0.469797	0.188734	-2.48921	0.0128028	0.0488932	1.8742	-1.8742	0.231912	-8.08152	6.39651e-16	8.04597e-15
WBGene00002259	lbp-7	114.104	-1.04331	0.273856	-3.80973	0.000139121	0.00103655	2.01556	-2.01556	0.519379	-3.8807	0.000104155	0.00028087
WBGene00002260	lbp-8	9.52413	0.750597	0.682669	1.0995	0.271549	0.478281
WBGene00002261	ldb-1	99.7007	0.301567	0.210972	1.42941	0.152886	0.323873	0.849689	-0.849689	0.595487	-1.42688	0.153615	0.197337
WBGene00002262	ldh-1	428.409	-0.30416	0.146894	-2.07061	0.0383953	0.117674	0.896093	-0.896093	0.277815	-3.2255	0.00125752	0.002671
WBGene00002263	lea-1	1402.19	-0.0182043	0.117863	-0.154454	0.877252	0.938614	0.474393	-0.474393	0.153317	-3.0942	0.00197343	0.0040128
WBGene00002264	lec-1	1278.53	-0.118576	0.142265	-0.833484	0.404572	0.611673	0.195952	-0.195952	0.149173	-1.31358	0.188986	0.237305
WBGene00002265	lec-2	2316.51	0.0670056	0.156083	0.429293	0.66771	0.815251	1.21523	-1.21523	0.167555	-7.25272	4.08482e-13	3.96553e-12
WBGene00002266	lec-3	186.105	0.181894	0.2156	0.843666	0.398856	0.606337	1.69738	-1.69738	0.323164	-5.25239	1.5014e-07	6.80361e-07
WBGene00002267	lec-4	681.843	-0.0809675	0.151883	-0.533091	0.59397	0.763901	1.26665	-1.26665	0.228109	-5.55284	2.81064e-08	1.42276e-07
WBGene00002268	lec-5	1701.1	0.247821	0.191455	1.29441	0.195524	0.383793	1.79141	-1.79141	0.229625	-7.80143	6.12077e-15	6.97803e-14
WBGene00002269	lec-6	2777.96	-0.531227	0.176411	-3.01131	0.00260121	0.0129938	1.54526	-1.54526	0.190599	-8.1074	5.17143e-16	6.57819e-15
WBGene00002270	lec-7	64.4745	0.864054	0.302552	2.85589	0.00429166	0.0197528
WBGene00002271	lec-8	7795.83	-0.137754	0.111742	-1.23278	0.217657	0.412916	2.10943	-2.10943	0.141915	-14.8641	5.63722e-50	5.06838e-48
WBGene00002272	lec-9	4783.93	-0.97998	0.128717	-7.61343	2.66917e-14	1.16504e-12	2.21999	-2.21999	0.153095	-14.5007	1.19856e-47	9.98212e-46
WBGene00002273	lec-10	2773.65	-1.19039	0.150755	-7.89619	2.87561e-15	1.42469e-13	1.30857	-1.30857	0.158538	-8.25401	1.53167e-16	2.03673e-15
WBGene00002274	lec-11	766.213	-0.44079	0.140102	-3.14621	0.00165403	0.00881473	1.69913	-1.69913	0.239186	-7.1038	1.21372e-12	1.11532e-11
WBGene00002275	lem-2	346.223	-0.766624	0.225544	-3.399	0.000676331	0.00408082	-1.63213	1.63213	0.39444	4.13785	3.50574e-05	0.000103498
WBGene00002276	lem-3	398.066	0.00398684	0.16899	0.0235922	0.981178	0.990046	-0.833205	0.833205	0.327884	2.54116	0.0110486	0.0188845
WBGene00002278	lep-2	333.475	-0.86489	0.158251	-5.46532	4.62072e-08	7.57289e-07	-1.32309	1.32309	0.502776	2.63157	0.00849906	0.0148837
WBGene00002280	let-2	2600.22	0.0493926	0.234858	0.210308	0.833427	0.913955	1.84188	-1.84188	0.112168	-16.4208	1.35758e-60	1.91807e-58
WBGene00002282	let-4	35.0488	0.355192	0.49892	0.711921	0.476514	0.674508
WBGene00002295	let-19	879.277	0.0304091	0.129839	0.234207	0.814824	0.904005	0.648066	-0.648066	0.221314	-2.92827	0.00340855	0.00656805
WBGene00002297	ect-2	828.158	-0.124554	0.170027	-0.732551	0.463832	0.662881	-1.8963	1.8963	0.310424	6.10872	1.00431e-09	6.32648e-09
WBGene00002299	let-23	132.272	0.497128	0.2414	2.05936	0.0394602	0.120091	2.2675	-2.2675	0.600244	-3.77763	0.000158327	0.000411391
WBGene00002324	let-49	211.193	-0.652946	0.176424	-3.70101	0.000214743	0.00151795	-1.06177	1.06177	0.603413	1.7596	0.0784754	0.108549
WBGene00002335	let-60	306.435	-0.378633	0.146464	-2.58516	0.00973338	0.0391433	-0.420037	0.420037	0.329388	1.2752	0.202237	0.25143
WBGene00002344	let-70	2476.14	-0.4767	0.107603	-4.43019	9.41507e-06	9.63583e-05	-0.361317	0.361317	0.145158	2.48913	0.0128056	0.0215295
WBGene00002348	myo-1	751.381	-0.369218	0.207375	-1.78043	0.0750055	0.194776	1.06081	-1.06081	0.293249	-3.61744	0.000297535	0.000728147
WBGene00002363	let-92	1235.97	-0.296725	0.129226	-2.29616	0.0216667	0.074394	-0.219158	0.219158	0.236794	0.92552	0.354695	0.411307
WBGene00002368	let-99	863.342	-0.440872	0.18035	-2.44454	0.0145035	0.0541578	-2.18704	2.18704	0.38543	5.67429	1.39263e-08	7.35057e-08
WBGene00002393	lpr-1	11.1176	0.580815	0.626241	0.927463	0.353686	0.564614
WBGene00002497	let-268	71.5466	0.371324	0.240131	1.54634	0.122022	0.27661	0.803372	-0.803372	0.716588	-1.12111	0.262242	0.316338
WBGene00002583	let-363	751.7	-0.275962	0.137848	-2.00193	0.0452923	0.133531	-0.412802	0.412802	0.226435	1.82305	0.0682957	0.0960632
WBGene00002601	let-381	15.8278	1.60888	0.53682	2.99706	0.00272596	0.0135255
WBGene00002632	let-413	191.538	-0.13449	0.162477	-0.827744	0.407816	0.614456	1.28991	-1.28991	0.393356	-3.27925	0.00104085	0.00225993
WBGene00002637	let-418	1092.04	-0.13641	0.125585	-1.08619	0.277395	0.484281	-0.279696	0.279696	0.230232	1.21484	0.224426	0.275467
WBGene00002694	let-502	924.574	0.0126117	0.134145	0.0940154	0.925097	0.964093	-0.461658	0.461658	0.237736	1.94189	0.05215	0.0755283
WBGene00002696	let-504	2270.92	-1.35886	0.132451	-10.2593	1.07432e-24	1.09227e-22	-1.29597	1.29597	0.196949	6.58024	4.6969e-11	3.50915e-10
WBGene00002717	let-526	1184.11	0.00289932	0.206163	0.0140632	0.98878	0.994166	-0.8257	0.8257	0.186454	4.42845	9.49148e-06	3.12512e-05
WBGene00002783	let-607	1425.9	-0.381665	0.104133	-3.66519	0.000247159	0.00171636	-0.321116	0.321116	0.181935	1.765	0.0775638	0.107363
WBGene00002804	let-630	303.783	-0.83668	0.153551	-5.44887	5.06913e-08	8.25996e-07	-1.11283	1.11283	0.449953	2.47321	0.0133905	0.022375
WBGene00002827	let-653	32.1798	1.24069	0.380551	3.26025	0.00111316	0.00626045
WBGene00002845	let-711	1160.26	-0.033733	0.201317	-0.167562	0.866928	0.93345	-0.265669	0.265669	0.212855	1.24812	0.211986	0.262191
WBGene00002850	let-716	825.547	-0.733999	0.134146	-5.47167	4.45826e-08	7.32077e-07	-0.0216485	0.0216485	0.22938	0.094378	0.924809	0.936288
WBGene00002855	let-721	802.617	-0.259394	0.136899	-1.89479	0.0581203	0.161167	-0.746233	0.746233	0.259494	2.87572	0.0040311	0.00764297
WBGene00002879	let-754	367.805	-0.418985	0.181071	-2.31393	0.0206717	0.0717762	0.375923	-0.375923	0.335119	-1.12176	0.261965	0.3161
WBGene00002881	let-756	54.8201	0.312054	0.26165	1.19264	0.233012	0.432289
WBGene00002889	let-765	757.071	-0.385908	0.150985	-2.55594	0.0105903	0.0419339	-0.558382	0.558382	0.335512	1.66427	0.096059	0.130408
WBGene00002891	let-767	1062.31	-0.364187	0.128916	-2.825	0.00472811	0.0214993	0.764468	-0.764468	0.175398	-4.35849	1.30964e-05	4.2019e-05
WBGene00002915	let-805	358.913	-0.12396	0.250399	-0.495048	0.620566	0.784323	0.985804	-0.985804	0.282593	-3.48842	0.000485877	0.00113534
WBGene00002957	let-858	624.265	-0.930575	0.117857	-7.89583	2.88392e-15	1.42469e-13	-0.863065	0.863065	0.298153	2.89471	0.00379515	0.00723547
WBGene00002974	lev-1	68.4181	0.435629	0.236241	1.844	0.0651835	0.175644
WBGene00002975	lev-8	10.0232	-0.393863	0.751064	-0.524407	0.599996	0.768739
WBGene00002976	lev-9	95.5514	0.604697	0.279738	2.16165	0.0306449	0.0984379	0.996831	-0.996831	0.583147	-1.7094	0.0873769	0.119731
WBGene00002977	lev-10	195.856	-0.0521191	0.200847	-0.259497	0.795252	0.893353	0.508229	-0.508229	0.623123	-0.815616	0.41472	0.471446
WBGene00002978	lev-11	4048.47	-1.25619	0.125401	-10.0174	1.27864e-23	1.17352e-21	1.43699	-1.43699	0.153951	-9.3341	1.01856e-20	1.98005e-19
WBGene00002979	lfe-2	225.228	-0.244062	0.183923	-1.32698	0.184515	0.3684	1.47816	-1.47816	0.345045	-4.28396	1.83594e-05	5.73468e-05
WBGene00002980	lgg-1	1814.05	0.0237107	0.142802	0.166038	0.868127	0.934068	0.679488	-0.679488	0.170308	-3.98977	6.61383e-05	0.000185497
WBGene00002981	lgg-2	911.646	0.35874	0.1176	3.0505	0.00228459	0.0116138	0.503964	-0.503964	0.206006	-2.44636	0.0144306	0.0239586
WBGene00002982	lgg-3	354.613	-0.987829	0.139397	-7.08643	1.37613e-12	4.72027e-11	-2.86901	2.86901	0.50015	5.7363	9.67675e-09	5.2729e-08
WBGene00002983	lgx-1	50.2277	-0.159068	0.391327	-0.406484	0.684387	0.825651
WBGene00002985	lig-1	1016.31	-0.450524	0.10356	-4.35036	1.35913e-05	0.000133701	-1.86734	1.86734	0.306167	6.0991	1.0667e-09	6.67701e-09
WBGene00002986	lig-4	268.659	-0.514183	0.163436	-3.14608	0.00165474	0.00881574	0.335964	-0.335964	0.492777	-0.681777	0.49538	0.548021
WBGene00002987	lim-4	89.0624	-0.269052	0.24902	-1.08044	0.279945	0.486657
WBGene00002988	lim-6	65.9323	0.505711	0.299149	1.6905	0.0909328	0.224542
WBGene00002989	lim-7	49.8885	-0.259151	0.360405	-0.719056	0.472107	0.670279
WBGene00002990	lin-1	79.8484	0.340582	0.251791	1.35264	0.176171	0.357304	1.78972	-1.78972	0.653969	-2.7367	0.00620591	0.011254
WBGene00002991	lin-2	81.2787	0.18199	0.234837	0.774964	0.438361	0.641004	0.443689	-0.443689	0.640043	-0.693217	0.488173	0.541411
WBGene00002992	lin-3	190.86	-0.294746	0.183009	-1.61056	0.107277	0.252729
WBGene00002994	lin-5	935.679	-0.544872	0.111505	-4.88653	1.02628e-06	1.29092e-05	-1.5029	1.5029	0.239711	6.26964	3.61884e-10	2.44303e-09
WBGene00002996	lin-7	92.2014	-0.639606	0.271994	-2.35155	0.0186954	0.0662672
WBGene00002997	lin-8	88.969	-0.00995473	0.210304	-0.047335	0.962246	0.981909	-0.0892141	0.0892141	0.543364	0.164188	0.869583	0.889762
WBGene00002998	lin-9	342.147	-0.486955	0.21824	-2.23128	0.0256625	0.0852547	-1.52706	1.52706	0.451555	3.38179	0.000720148	0.00161962
WBGene00002999	lin-10	159.99	-0.156222	0.180888	-0.863635	0.387788	0.597212	0.546245	-0.546245	0.402209	-1.35811	0.174428	0.221024
WBGene00003000	lin-11	61.5699	0.712804	0.36855	1.93407	0.0531039	0.150753
WBGene00003001	lin-12	110.722	0.723804	0.251242	2.88091	0.00396531	0.0185015
WBGene00003002	lin-13	1218.28	-0.373928	0.164075	-2.27901	0.0226665	0.0770815	-1.09308	1.09308	0.243715	4.48506	7.28944e-06	2.44693e-05
WBGene00003003	lin-14	73.4882	0.165285	0.315279	0.524248	0.600106	0.768764
WBGene00003006	lin-17	84.0057	0.415691	0.267887	1.55174	0.120725	0.274367	0.646678	-0.646678	0.614031	-1.05317	0.292264	0.347533
WBGene00003007	lin-18	83.8444	-0.165029	0.230702	-0.715334	0.474402	0.672695	1.38125	-1.38125	0.454054	-3.04204	0.00234977	0.00470669
WBGene00003009	lin-23	687.73	-0.492636	0.170531	-2.88884	0.00386665	0.0181208	-1.41741	1.41741	0.254086	5.57848	2.42635e-08	1.23562e-07
WBGene00003010	lin-24	537.415	-0.0702874	0.127321	-0.552049	0.580915	0.753627	-1.48559	1.48559	0.321292	4.6238	3.76771e-06	1.3428e-05
WBGene00003011	lin-25	107.645	0.243143	0.221084	1.09978	0.271428	0.478117	0.535539	-0.535539	0.697765	-0.767506	0.44278	0.498687
WBGene00003012	lin-26	525.716	-0.643581	0.161341	-3.98896	6.63634e-05	0.000547991	-1.46641	1.46641	0.28212	5.19782	2.01641e-07	8.96787e-07
WBGene00003014	lin-28	117.779	-0.232941	0.185423	-1.25626	0.20902	0.401874
WBGene00003015	lin-29	74.446	0.390219	0.244958	1.59301	0.111159	0.258826	1.20332	-1.20332	0.65261	-1.84386	0.065203	0.0920239
WBGene00003017	lin-31	9.59142	0.474739	0.619233	0.766657	0.443286	0.645222
WBGene00003018	lin-32	13.7434	-0.271017	0.570068	-0.475413	0.634493	0.794402
WBGene00003019	lin-33	71.7787	0.689401	0.265735	2.59432	0.00947785	0.0382607	1.76499	-1.76499	0.659866	-2.67477	0.00747801	0.0132957
WBGene00003020	lin-35	432.053	-0.183676	0.162518	-1.13019	0.258397	0.462797	-1.64498	1.64498	0.390861	4.20861	2.56949e-05	7.80715e-05
WBGene00003021	lin-36	473.723	-0.307989	0.139943	-2.20082	0.0277484	0.0906737	-2.28505	2.28505	0.382541	5.97335	2.32437e-09	1.39638e-08
WBGene00003022	lin-37	437.684	-0.701861	0.145479	-4.82449	1.40359e-06	1.7182e-05	-2.78269	2.78269	0.432082	6.44019	1.19321e-10	8.47458e-10
WBGene00003024	lin-39	54.787	-0.0406883	0.28661	-0.141964	0.887109	0.943532
WBGene00003025	lin-40	842.134	0.0551778	0.139442	0.395705	0.692323	0.830439	-0.736858	0.736858	0.236471	3.11606	0.00183282	0.00375098
WBGene00003026	lin-41	1072.03	-0.520302	0.164997	-3.15339	0.00161385	0.00863855	-1.62523	1.62523	0.260476	6.23948	4.39036e-10	2.92395e-09
WBGene00003029	lin-44	31.7455	0.308636	0.396532	0.778338	0.43637	0.639544
WBGene00003030	lin-45	916.211	-0.168645	0.172807	-0.975913	0.329108	0.53875	-1.06726	1.06726	0.256009	4.16882	3.06179e-05	9.17609e-05
WBGene00003031	lin-46	13.7917	-0.458951	0.597098	-0.768637	0.442109	0.644133
WBGene00003033	lin-48	18.8363	-0.087191	0.574117	-0.15187	0.87929	0.939336
WBGene00003034	lin-49	539.802	-0.256853	0.141493	-1.81531	0.0694759	0.184433	-1.26151	1.26151	0.332892	3.78955	0.000150918	0.000394341
WBGene00003035	lin-52	413.299	-0.399616	0.12776	-3.12786	0.00176085	0.00931098	-2.26987	2.26987	0.455872	4.97918	6.38528e-07	2.61628e-06
WBGene00003036	lin-53	1104.66	-0.160234	0.140989	-1.1365	0.255746	0.459553	-1.97776	1.97776	0.2711	7.2953	2.98005e-13	2.91809e-12
WBGene00003037	lin-54	417.686	-0.686192	0.16731	-4.10131	4.10815e-05	0.000357887	-2.2394	2.2394	0.391842	5.71508	1.09654e-08	5.90596e-08
WBGene00003038	lin-56	159.212	-0.0873103	0.198118	-0.440699	0.659431	0.810904	-0.631332	0.631332	0.570044	1.10751	0.268072	0.32224
WBGene00003040	lin-59	357.14	0.277543	0.212082	1.30866	0.190649	0.37754	0.88422	-0.88422	0.277911	-3.18167	0.00146431	0.00305367
WBGene00003041	lin-61	473.381	-0.575629	0.132733	-4.33673	1.44618e-05	0.000141444	-1.05247	1.05247	0.281493	3.73887	0.000184851	0.000472092
WBGene00003043	lip-1	415.045	-0.532568	0.161237	-3.30301	0.000956529	0.00549202	-1.59397	1.59397	0.331766	4.80451	1.55135e-06	5.94395e-06
WBGene00003044	lir-1	472.586	-0.541956	0.186363	-2.90807	0.00363672	0.0172354	-1.52364	1.52364	0.292516	5.20875	1.90121e-07	8.47935e-07
WBGene00003045	lir-2	122.74	-0.2568	0.231855	-1.10759	0.268041	0.474257	-0.186204	0.186204	0.557704	0.333877	0.738473	0.774393
WBGene00003046	lir-3	24.4537	-0.200561	0.484358	-0.414075	0.678819	0.821838
WBGene00003047	lis-1	332.91	-0.0951419	0.193643	-0.491327	0.623196	0.786358	-0.0897972	0.0897972	0.298324	0.301006	0.76341	0.797584
WBGene00003048	lit-1	361.202	0.18192	0.213071	0.8538	0.393216	0.601695	-0.894426	0.894426	0.297156	3.00996	0.00261286	0.00517342
WBGene00003052	lmn-1	1183.61	-0.526599	0.142574	-3.69351	0.000221177	0.00156019	-0.683198	0.683198	0.178552	3.82633	0.000130066	0.000343484
WBGene00003053	lmp-1	1289.35	0.188949	0.114569	1.64922	0.0991028	0.238812	1.6239	-1.6239	0.180961	-8.97376	2.86564e-19	4.83432e-18
WBGene00003055	lon-1	561.85	-0.674803	0.171255	-3.94033	8.1368e-05	0.000656941	2.51121	-2.51121	0.174466	-14.3937	5.66747e-47	4.43971e-45
WBGene00003056	lon-2	180.496	0.415566	0.222516	1.86758	0.0618206	0.16908	2.05091	-2.05091	0.437849	-4.68407	2.8124e-06	1.0297e-05
WBGene00003057	lon-3	17.2159	-0.548304	1.49161	-0.367592	0.713177	0.843248
WBGene00003058	lov-1	193.624	0.0955027	0.265336	0.359931	0.718899	0.847361	0.0908461	-0.0908461	0.607431	-0.149558	0.881113	0.898952
WBGene00003059	lpd-2	362.899	-1.12316	0.152343	-7.37259	1.67344e-13	6.62316e-12	-1.31998	1.31998	0.457805	2.88328	0.00393561	0.00747804
WBGene00003060	lpd-3	917.783	-0.147942	0.169222	-0.874247	0.381984	0.592096	-0.0462075	0.0462075	0.224284	0.206023	0.836773	0.862418
WBGene00003061	lpd-5	608.15	-0.705035	0.137936	-5.11134	3.19888e-07	4.51159e-06	0.19876	-0.19876	0.245178	-0.810679	0.41755	0.47405
WBGene00003062	lpd-6	480.218	-0.761193	0.169464	-4.49177	7.06334e-06	7.51431e-05	-0.718161	0.718161	0.25943	2.76822	0.00563628	0.0103275
WBGene00003063	lpd-7	2059.54	-0.811675	0.10347	-7.84454	4.3456e-15	2.09613e-13	-0.47418	0.47418	0.142978	3.31646	0.000911672	0.00200254
WBGene00003064	lpd-8	555.148	-0.928691	0.142925	-6.49775	8.1532e-11	2.18349e-09	-0.891829	0.891829	0.306723	2.9076	0.00364212	0.00696722
WBGene00003065	lpd-9	660.257	-0.507991	0.125967	-4.03272	5.51352e-05	0.000465279	-0.169211	0.169211	0.252691	0.669635	0.50309	0.555851
WBGene00003066	lpl-1	227.353	-0.282064	0.181463	-1.55439	0.120092	0.273403	-0.335305	0.335305	0.478038	0.701419	0.483042	0.536623
WBGene00003067	lrg-1	286.111	0.43899	0.249832	1.75714	0.0788945	0.202441	-2.41513	2.41513	0.654995	3.68725	0.000226695	0.000568317
WBGene00003068	lrk-1	273.356	0.354624	0.210703	1.68305	0.0923646	0.227086	0.888941	-0.888941	0.424884	-2.0922	0.0364208	0.0547419
WBGene00003071	lrp-1	970.592	0.231972	0.131856	1.75928	0.0785294	0.201778	1.65215	-1.65215	0.215572	-7.66403	1.80182e-14	1.94755e-13
WBGene00003072	lrp-2	884.928	0.306179	0.182082	1.68154	0.0926572	0.227608	1.25093	-1.25093	0.221896	-5.63745	1.72587e-08	8.98953e-08
WBGene00003073	lars-1	1186.56	-0.120132	0.110534	-1.08684	0.277108	0.484015	0.524088	-0.524088	0.180677	-2.90069	0.00372347	0.00711081
WBGene00003074	lars-2	377.327	-0.659574	0.154599	-4.26635	1.98698e-05	0.000188369	-0.747306	0.747306	0.392175	1.90554	0.0567097	0.0812986
WBGene00003075	lrx-1	42.9931	0.263119	0.341036	0.771527	0.440395	0.642656
WBGene00003076	lsm-1	497.496	-0.271009	0.163275	-1.65983	0.0969478	0.23512	-0.725889	0.725889	0.33747	2.15097	0.0314785	0.0481551
WBGene00003077	lsm-3	320.53	-0.443049	0.14488	-3.05803	0.00222798	0.0113703	-0.974814	0.974814	0.399035	2.44293	0.0145686	0.024165
WBGene00003078	lsm-4	94.8932	-0.534927	0.222306	-2.40626	0.0161168	0.0586974
WBGene00003079	lsm-5	395.059	-0.548281	0.142151	-3.85704	0.000114767	0.000883434	-0.860547	0.860547	0.278452	3.09046	0.00199845	0.00405952
WBGene00003080	lsm-6	116.434	-0.614471	0.219848	-2.79499	0.00519017	0.0232886	-0.41564	0.41564	0.510598	0.814026	0.41563	0.472141
WBGene00003081	lsm-7	313.83	-1.0067	0.162296	-6.20283	5.54581e-10	1.30059e-08	-1.58669	1.58669	0.388193	4.08737	4.36291e-05	0.00012663
WBGene00003082	lsm-8	229.923	-0.793736	0.190534	-4.16584	3.10208e-05	0.000278236	-0.973463	0.973463	0.463505	2.10022	0.0357094	0.0537953
WBGene00003083	lst-1	630.121	0.127851	0.205396	0.622461	0.533639	0.718814	-2.57512	2.57512	0.320059	8.04575	8.57219e-16	1.06808e-14
WBGene00003084	lst-2	201.767	0.155746	0.186031	0.837206	0.402477	0.609841	0.821054	-0.821054	0.388932	-2.11104	0.0347685	0.0525378
WBGene00003085	ccar-1	2786.55	-0.862247	0.108474	-7.94887	1.88215e-15	9.51103e-14	-1.07371	1.07371	0.182253	5.89131	3.83141e-09	2.22571e-08
WBGene00003086	lst-4	724.549	-0.120853	0.17552	-0.688546	0.491109	0.686318	-2.0982	2.0982	0.304465	6.89143	5.52361e-12	4.61e-11
WBGene00003087	lsy-2	129.227	0.547933	0.276823	1.97937	0.0477748	0.139113	0.944396	-0.944396	0.633304	-1.49122	0.135904	0.177174
WBGene00003089	ltd-1	67.9048	0.408163	0.25823	1.58062	0.113965	0.263088
WBGene00003090	lys-1	5634.7	-0.523442	0.154629	-3.38515	0.000711384	0.00426317	2.92558	-2.92558	0.136683	-21.404	1.22535e-101	5.70292e-99
WBGene00003091	lys-2	8309.14	-1.38641	0.157708	-8.791	1.48237e-18	9.25338e-17	2.53706	-2.53706	0.205732	-12.3319	6.10216e-35	2.84002e-33
WBGene00003092	lys-3	80.0014	0.303126	0.303993	0.997147	0.318693	0.52742	0.531602	-0.531602	0.665402	-0.798919	0.424337	0.480981
WBGene00003093	lys-4	1321.7	2.9535	0.212908	13.8722	9.33663e-44	4.2845e-41	2.69459	-2.69459	0.375384	-7.17823	7.06181e-13	6.63575e-12
WBGene00003094	lys-5	17.9355	2.55952	0.600751	4.26053	2.0394e-05	0.000192265
WBGene00003095	lys-6	76.7336	-1.13504	0.271172	-4.18569	2.84305e-05	0.00025814	3.06126	-3.06126	0.430402	-7.11257	1.13904e-12	1.04914e-11
WBGene00003096	lys-7	10602.9	1.36902	0.173309	7.89933	2.80413e-15	1.39623e-13	1.75516	-1.75516	0.171063	-10.2603	1.06379e-24	2.72386e-23
WBGene00003097	lys-8	3962.97	0.0419421	0.148418	0.282594	0.777488	0.88202	1.74953	-1.74953	0.15328	-11.414	3.56045e-30	1.29222e-28
WBGene00003098	lys-9	31.2211	-0.323301	0.398883	-0.810515	0.417644	0.622908
WBGene00003100	mab-3	32.1837	0.0740192	0.470208	0.157418	0.874915	0.937354
WBGene00003102	mab-5	14.9865	0.307604	0.51582	0.59634	0.550948	0.73062
WBGene00003106	mab-9	21.8771	0.0943567	0.383809	0.245843	0.805804	0.899142
WBGene00003107	mab-10	42.8319	-0.227588	0.454632	-0.500599	0.616653	0.781005	0.375655	-0.375655	0.669642	-0.560979	0.574812	0.624113
WBGene00003111	mab-20	131.547	1.10348	0.282772	3.90237	9.52567e-05	0.000751214	-0.441163	0.441163	0.655458	0.673061	0.500909	0.553673
WBGene00003112	mab-21	47.2428	0.329675	0.291115	1.13245	0.257443	0.461577	1.35658	-1.35658	0.764632	-1.77416	0.0760375	0.105527
WBGene00003114	mab-23	15.1519	0.699919	0.600085	1.16637	0.243466	0.444464
WBGene00003119	mac-1	259.646	-0.470293	0.231878	-2.02819	0.042541	0.127077	-0.314925	0.314925	0.33519	0.939544	0.347452	0.403914
WBGene00003123	mag-1	501.193	-0.396802	0.123662	-3.20875	0.00133313	0.00731113	-0.938063	0.938063	0.30924	3.03345	0.00241773	0.00482693
WBGene00003124	mai-1	139.973	0.389642	0.187872	2.07398	0.0380814	0.116871	1.78995	-1.78995	0.53983	-3.31576	0.000913933	0.002006
WBGene00003129	map-1	310.179	-0.335905	0.165742	-2.02668	0.0426952	0.127403	-0.0976738	0.0976738	0.352893	0.276781	0.781949	0.813728
WBGene00003130	map-2	470.936	-0.197787	0.187352	-1.05569	0.291108	0.498253	0.0674536	-0.0674536	0.264426	-0.255094	0.798651	0.828929
WBGene00003132	mat-1	796.909	-0.171961	0.144637	-1.18891	0.234475	0.434149	-1.39594	1.39594	0.272088	5.13049	2.88996e-07	1.26119e-06
WBGene00003133	mat-2	575.941	-0.40698	0.130765	-3.1123	0.00185638	0.00975835	-0.777444	0.777444	0.325443	2.38888	0.0168999	0.0276094
WBGene00003134	mat-3	248.496	-0.915932	0.178366	-5.13513	2.81952e-07	4.01616e-06	-1.07901	1.07901	0.382121	2.82373	0.0047469	0.00886271
WBGene00003136	mau-2	252.881	-0.345109	0.170762	-2.02099	0.0432807	0.128788	-1.5201	1.5201	0.454782	3.34247	0.00083035	0.00184129
WBGene00003142	mau-8	217.368	-0.491226	0.172139	-2.85366	0.00432192	0.0198598	-1.6794	1.6794	0.64361	2.60934	0.00907171	0.0157956
WBGene00003143	max-1	153.459	-0.755435	0.2255	-3.35004	0.000807988	0.00477011	-0.107016	0.107016	0.550985	0.194226	0.845999	0.870535
WBGene00003144	max-2	1028.72	0.0552364	0.16736	0.330045	0.741366	0.860637	-1.3734	1.3734	0.251392	5.46317	4.67719e-08	2.28291e-07
WBGene00003148	mbf-1	846.858	-0.234143	0.144067	-1.62523	0.104113	0.247373	0.822064	-0.822064	0.217837	-3.77375	0.000160809	0.000417018
WBGene00003149	mbk-1	207.53	0.464171	0.166209	2.79269	0.00522718	0.0234361	1.50134	-1.50134	0.548541	-2.73696	0.00620098	0.0112502
WBGene00003150	mbk-2	2025.49	-0.340204	0.159377	-2.13459	0.0327943	0.103806	-1.37365	1.37365	0.198574	6.91755	4.59508e-12	3.88007e-11
WBGene00003151	mca-1	587	0.126938	0.122934	1.03257	0.301804	0.51034	0.781172	-0.781172	0.245223	-3.18556	0.00144476	0.00302086
WBGene00003153	mca-3	871.477	0.0774816	0.202929	0.381816	0.702598	0.836365	0.408575	-0.408575	0.253401	-1.61237	0.106882	0.143185
WBGene00003154	mcm-2	1351.76	-0.336163	0.192126	-1.7497	0.0801706	0.204879	-3.04782	3.04782	0.269541	11.3074	1.20579e-29	4.25901e-28
WBGene00003155	mcm-3	1353.94	-0.285866	0.159177	-1.7959	0.0725101	0.189963	-2.6961	2.6961	0.307535	8.7668	1.83823e-18	2.88573e-17
WBGene00003156	mcm-4	1401.97	-0.121752	0.148048	-0.822387	0.410857	0.616984	-2.28757	2.28757	0.308636	7.41185	1.24547e-13	1.25851e-12
WBGene00003157	mcm-5	1192.6	-0.164463	0.107213	-1.53398	0.125034	0.281316	-2.37952	2.37952	0.257399	9.24449	2.36363e-20	4.47393e-19
WBGene00003158	mcm-6	1899.18	-0.477117	0.121612	-3.92327	8.73534e-05	0.000696653	-2.49539	2.49539	0.290721	8.58344	9.20791e-18	1.36685e-16
WBGene00003159	mcm-7	1868.68	-0.0830082	0.178223	-0.465755	0.641391	0.799644	-2.33705	2.33705	0.247911	9.42698	4.22082e-21	8.47592e-20
WBGene00003160	mdf-1	475.206	-0.547155	0.137744	-3.97225	7.11967e-05	0.000583139	-0.343478	0.343478	0.288152	1.192	0.23326	0.28538
WBGene00003161	mdf-2	326.59	-0.331817	0.20638	-1.60779	0.10788	0.253698	-2.02462	2.02462	0.450964	4.48953	7.13813e-06	2.40123e-05
WBGene00003162	mdh-2	1289.28	-0.707938	0.156724	-4.51711	6.26892e-06	6.74098e-05	0.714315	-0.714315	0.180913	-3.9484	7.86766e-05	0.000216895
WBGene00003163	mdl-1	790.087	0.0623627	0.131854	0.472967	0.636237	0.795484	1.88365	-1.88365	0.180964	-10.409	2.25696e-25	6.07384e-24
WBGene00003164	mdt-6	592.906	-0.44048	0.122876	-3.58476	0.000337385	0.00225352	-2.32625	2.32625	0.415256	5.60195	2.11948e-08	1.08963e-07
WBGene00003165	mec-1	192.987	0.43965	0.315379	1.39404	0.163306	0.339303
WBGene00003166	mec-2	77.3194	0.310962	0.258568	1.20263	0.22912	0.427544
WBGene00003167	mec-3	22.3095	-0.114279	0.390396	-0.292726	0.769731	0.876367
WBGene00003168	mec-4	84.0849	-0.438899	0.223141	-1.96692	0.0491925	0.142177
WBGene00003169	mec-5	105.527	0.0847831	0.201144	0.421505	0.673386	0.818837	1.83513	-1.83513	0.57429	-3.19548	0.001396	0.00292741
WBGene00003170	mec-6	15.6007	0.320847	0.459132	0.698812	0.48467	0.681564
WBGene00003171	mec-7	67.0161	-0.408483	0.275298	-1.48379	0.137865	0.30173
WBGene00003172	mec-8	105.528	0.15746	0.233387	0.674674	0.499883	0.692745	0.0411615	-0.0411615	0.613717	-0.0670692	0.946527	0.955537
WBGene00003173	mec-9	34.4821	0.0728567	0.433348	0.168125	0.866485	0.933358
WBGene00003174	mec-10	54.8568	0.220752	0.346544	0.637011	0.524118	0.710953
WBGene00003175	mec-12	106.221	-0.164407	0.280263	-0.586618	0.55746	0.734984	0.772458	-0.772458	0.534816	-1.44434	0.148642	0.191665
WBGene00003176	mec-14	7.42806	0.60302	0.663284	0.909144	0.363274	1
WBGene00003177	mec-15	471.573	-0.435589	0.200221	-2.17554	0.0295894	0.0956584	-1.54847	1.54847	0.351106	4.41026	1.03246e-05	3.37833e-05
WBGene00003178	mec-17	98.8154	-0.138902	0.233728	-0.594289	0.552319	0.731418	1.33471	-1.33471	0.49569	-2.69264	0.00708897	0.0126781
WBGene00003179	mec-18	25.1683	-0.106296	0.392765	-0.270635	0.786671	0.887855
WBGene00003182	mef-2	54.399	0.0022536	0.331518	0.00679783	0.994576	0.997101	0.399994	-0.399994	0.59952	-0.667191	0.50465	0.557497
WBGene00003183	mei-1	908.127	-0.301081	0.124812	-2.41227	0.0158537	0.0579129	-2.40615	2.40615	0.344018	6.99425	2.66679e-12	2.31864e-11
WBGene00003184	mei-2	1051.01	-0.233459	0.0982297	-2.37667	0.0174698	0.0627767	-2.20733	2.20733	0.262316	8.41479	3.93614e-17	5.53157e-16
WBGene00003185	mek-1	390.746	0.034242	0.141837	0.241417	0.809232	0.900921	-0.297793	0.297793	0.427736	0.696209	0.486298	0.539634
WBGene00003186	mek-2	76.5611	-0.034576	0.241042	-0.143444	0.885939	0.942977
WBGene00003196	mel-11	821.514	-0.123427	0.158253	-0.779936	0.435429	0.63892	-0.94181	0.94181	0.300255	3.1367	0.00170859	0.00351492
WBGene00003209	mel-26	1010.14	-0.0243544	0.139389	-0.174722	0.861298	0.930716	-1.60507	1.60507	0.300766	5.3366	9.47057e-08	4.40513e-07
WBGene00003210	mel-28	1062.53	-0.462214	0.14904	-3.10128	0.00192685	0.0100417	-1.52565	1.52565	0.251525	6.06562	1.31446e-09	8.15689e-09
WBGene00003214	mel-32	2019.31	-0.402815	0.112457	-3.58193	0.000341061	0.00227206	0.230037	-0.230037	0.137868	-1.66853	0.0952103	0.129345
WBGene00003216	memi-1	442.414	-0.37867	0.153965	-2.45945	0.013915	0.0524215	-2.99935	2.99935	0.459486	6.52763	6.68202e-11	4.88615e-10
WBGene00003218	mep-1	766.291	-0.321516	0.163721	-1.96381	0.0495526	0.142845	-1.5167	1.5167	0.307877	4.92634	8.37857e-07	3.35992e-06
WBGene00003219	mes-1	102.043	0.490283	0.314201	1.56041	0.118663	0.271197
WBGene00003220	mes-2	313.742	-0.228312	0.189014	-1.20791	0.227081	0.424955	-2.28489	2.28489	0.424688	5.38016	7.44207e-08	3.51098e-07
WBGene00003221	mes-3	302.198	0.164712	0.15406	1.06914	0.285005	0.491598	-0.327226	0.327226	0.38541	0.849035	0.395862	0.452283
WBGene00003222	mes-4	523.519	-0.413695	0.134812	-3.06867	0.00215013	0.0110406	-2.24234	2.24234	0.395143	5.67474	1.38899e-08	7.33623e-08
WBGene00003224	mes-6	178.684	-0.00655969	0.310447	-0.0211298	0.983142	0.991316	-1.3489	1.3489	0.580406	2.32406	0.0201224	0.0322545
WBGene00003225	mev-1	493.296	-0.427389	0.148628	-2.87556	0.00403309	0.0187611	0.49545	-0.49545	0.228853	-2.16492	0.0303937	0.0466488
WBGene00003228	mex-1	1349.12	-0.360326	0.163239	-2.20735	0.0272899	0.0895025	-3.03328	3.03328	0.334143	9.0778	1.10796e-19	1.94804e-18
WBGene00003229	mex-3	1801.53	-0.251217	0.144032	-1.74418	0.0811284	0.206611	-3.01652	3.01652	0.332189	9.08073	1.07846e-19	1.9004e-18
WBGene00003230	mex-5	3142.18	-0.044201	0.199665	-0.221376	0.8248	0.909782	-2.91978	2.91978	0.202175	14.4418	2.82173e-47	2.27812e-45
WBGene00003231	mex-6	2191.17	0.129999	0.133052	0.977051	0.328544	0.538218	-3.22598	3.22598	0.309562	10.4211	1.98633e-25	5.38214e-24
WBGene00003232	mgl-1	72.528	0.124727	0.33523	0.372063	0.709846	0.841009
WBGene00003233	mgl-2	83.6218	0.606988	0.327223	1.85497	0.0636005	0.172504
WBGene00003234	mif-1	148.933	0.0112768	0.241695	0.0466573	0.962786	0.982233	0.748326	-0.748326	0.5138	-1.45645	0.145267	0.187895
WBGene00003235	mif-2	199.646	-0.8233	0.251057	-3.27933	0.00104053	0.00590352	0.658815	-0.658815	0.374668	-1.7584	0.0786802	0.108813
WBGene00003236	mif-3	156.077	-0.623867	0.177028	-3.52412	0.000424895	0.0027483	-0.313617	0.313617	0.559466	0.560565	0.575094	0.624248
WBGene00003237	mif-4	7.48169	0.225454	0.69939	0.322358	0.747182	1
WBGene00003238	mig-1	92.1672	-0.217231	0.224146	-0.969151	0.33247	0.542188	2.2094	-2.2094	0.648334	-3.40782	0.000654845	0.00148681
WBGene00003239	mig-2	138.561	0.332241	0.186434	1.78208	0.074736	0.194266	0.789976	-0.789976	0.559074	-1.41301	0.157653	0.20187
WBGene00003241	mig-5	822.066	-0.34251	0.12047	-2.84312	0.00446738	0.0204949	-2.54678	2.54678	0.35865	7.10101	1.23847e-12	1.13412e-11
WBGene00003242	mig-6	1743.38	0.746362	0.161717	4.61524	3.92636e-06	4.38878e-05	1.39313	-1.39313	0.15265	-9.12626	7.09063e-20	1.26926e-18
WBGene00003243	mig-10	146.799	0.54189	0.210641	2.57257	0.0100946	0.0403378	0.987121	-0.987121	0.367633	-2.68507	0.00725145	0.0129278
WBGene00003245	mig-13	138.647	0.0705083	0.244564	0.288302	0.773116	0.878755	1.38165	-1.38165	0.551387	-2.50578	0.0122182	0.0206428
WBGene00003246	mig-14	405.632	0.286807	0.197018	1.45575	0.145463	0.313667	-2.28512	2.28512	0.396123	5.76871	7.98799e-09	4.43515e-08
WBGene00003247	mig-15	167.891	0.382324	0.238528	1.60285	0.108968	0.255478	1.02502	-1.02502	0.551903	-1.85724	0.0632767	0.0897053
WBGene00003248	mig-17	107.009	0.686561	0.227153	3.02247	0.00250725	0.0125806	1.13281	-1.13281	0.459987	-2.4627	0.0137893	0.0229735
WBGene00003249	mig-18	109.065	-0.660403	0.223186	-2.95897	0.00308665	0.0149995	2.39925	-2.39925	0.479766	-5.00087	5.70736e-07	2.35559e-06
WBGene00003252	mig-21	23.7141	0.276318	0.534312	0.517147	0.605054	0.772131
WBGene00003253	mig-22	730.113	-0.364562	0.12508	-2.91464	0.00356102	0.0169315	-1.33415	1.33415	0.271594	4.9123	9.00147e-07	3.58428e-06
WBGene00003254	mig-23	101.47	-0.0703841	0.225225	-0.312506	0.754656	0.868817	1.68287	-1.68287	0.558956	-3.01074	0.00260614	0.0051614
WBGene00003258	cogc-1	331.737	-0.204678	0.184357	-1.11023	0.2669	0.47279	-1.55849	1.55849	0.51691	3.01502	0.00256964	0.00509676
WBGene00003367	mix-1	745.969	-0.470646	0.15012	-3.13514	0.00171774	0.00910854	-0.723719	0.723719	0.345888	2.09235	0.036407	0.0547316
WBGene00003368	mkk-4	70.8869	0.414214	0.343897	1.20447	0.228408	0.426561
WBGene00003369	mlc-1	1468.62	-1.34566	0.138822	-9.6934	3.21632e-22	2.71691e-20	1.24876	-1.24876	0.163441	-7.64041	2.16531e-14	2.31826e-13
WBGene00003370	mlc-2	1714.59	-2.01372	0.13628	-14.7764	2.07975e-49	1.35816e-46	1.47559	-1.47559	0.181736	-8.1194	4.68479e-16	5.97839e-15
WBGene00003371	mlc-3	4984.14	-1.14554	0.125734	-9.11082	8.17587e-20	5.48688e-18	1.4883	-1.4883	0.138588	-10.739	6.67729e-27	1.98612e-25
WBGene00003372	mlc-4	942.78	0.0814141	0.125543	0.648495	0.516665	0.705844	-0.273617	0.273617	0.198177	1.38067	0.167381	0.212828
WBGene00003373	mlh-1	542.284	-0.397511	0.171131	-2.32285	0.0201872	0.0703719	-2.05005	2.05005	0.374688	5.47135	4.46611e-08	2.18663e-07
WBGene00003374	mlk-1	194.353	0.908601	0.169966	5.34579	9.00247e-08	1.40619e-06	0.909268	-0.909268	0.365754	-2.48601	0.0129185	0.0216964
WBGene00003375	mlp-1	132.894	-0.226113	0.238343	-0.948689	0.342779	0.553026	1.06701	-1.06701	0.487206	-2.19006	0.0285198	0.0440462
WBGene00003377	mls-2	39.1014	0.296993	0.403883	0.735346	0.462129	0.661588
WBGene00003378	mml-1	136.736	0.587751	0.195627	3.00445	0.00266057	0.0132484	1.14873	-1.14873	0.492823	-2.33091	0.019758	0.0317282
WBGene00003380	mnm-2	12.7981	-0.39575	0.528668	-0.74858	0.45411	0.654639
WBGene00003384	moc-1	90.2195	0.575851	0.2765	2.08264	0.0372839	0.115099	0.323854	-0.323854	0.649464	-0.498648	0.618027	0.665034
WBGene00003385	moc-2	64.1928	0.187279	0.252712	0.741075	0.458648	0.658441	1.07152	-1.07152	0.618642	-1.73206	0.0832631	0.114626
WBGene00003386	mod-1	35.6383	0.536739	0.442012	1.21431	0.22463	0.421956
WBGene00003387	mod-5	26.7412	0.763207	0.413498	1.84574	0.0649307	0.175165
WBGene00003388	moe-3	32.2026	0.244014	0.40232	0.606517	0.544171	0.726405
WBGene00003389	mog-1	697.309	-0.633171	0.126749	-4.99549	5.86865e-07	7.84598e-06	-0.563736	0.563736	0.337956	1.66808	0.0953005	0.129445
WBGene00003390	mog-2	247.511	-0.384962	0.187895	-2.04882	0.0404796	0.122405
WBGene00003391	mog-3	527.43	-1.05909	0.164813	-6.42599	1.31014e-10	3.43254e-09	-0.480527	0.480527	0.283758	1.69344	0.0903725	0.123558
WBGene00003392	mog-4	458.58	-0.571143	0.148746	-3.83973	0.000123169	0.000937377	-0.520205	0.520205	0.33772	1.54035	0.123476	0.162777
WBGene00003393	mog-5	675.363	-0.294672	0.134694	-2.18772	0.0286904	0.0932977	-0.608654	0.608654	0.315618	1.92845	0.0537994	0.0776187
WBGene00003394	mom-1	55.2288	0.265059	0.305752	0.866909	0.385992	0.595204
WBGene00003395	mom-2	1256.39	-0.219136	0.208514	-1.05094	0.293285	0.501026	-2.3528	2.3528	0.235402	9.99482	1.60571e-23	3.79235e-22
WBGene00003396	mom-4	303.29	-0.255046	0.18169	-1.40374	0.160396	0.33487	-1.33735	1.33735	0.368802	3.62619	0.00028763	0.000705871
WBGene00003397	mom-5	467.328	-0.167109	0.125734	-1.32907	0.183825	0.367744	-0.328365	0.328365	0.313501	1.04741	0.294909	0.350296
WBGene00003400	dapk-1	75.8504	0.216526	0.273857	0.790655	0.429145	0.633495	2.44673	-2.44673	0.712844	-3.43234	0.000598393	0.00137072
WBGene00003401	mpk-1	335.438	-0.143449	0.199521	-0.718969	0.47216	0.670279	-1.25635	1.25635	0.394752	3.18262	0.00145951	0.00304526
WBGene00003402	mpk-2	136.738	0.852313	0.184438	4.62113	3.81664e-06	4.28306e-05	2.69851	-2.69851	0.479014	-5.63346	1.76629e-08	9.19401e-08
WBGene00003403	mps-1	34.4675	0.162275	0.342187	0.47423	0.635336	0.795118
WBGene00003404	mpz-1	249.304	0.356283	0.217694	1.63663	0.101708	0.243329	1.13543	-1.13543	0.496551	-2.28663	0.0222172	0.0351917
WBGene00003405	mre-11	517.016	-0.385315	0.123834	-3.11155	0.00186109	0.00977405	-1.98602	1.98602	0.334186	5.94287	2.80075e-09	1.66238e-08
WBGene00003406	mrg-1	877.903	-0.458416	0.149471	-3.06692	0.00216278	0.0110942	-2.26763	2.26763	0.264022	8.5888	8.78851e-18	1.30704e-16
WBGene00003407	mrp-1	363.001	0.0745231	0.178482	0.417539	0.676284	0.820356	1.26178	-1.26178	0.281828	-4.47713	7.5654e-06	2.53204e-05
WBGene00003408	mrp-2	194.028	0.0349232	0.210064	0.16625	0.86796	0.934028	0.756345	-0.756345	0.374756	-2.01823	0.0435669	0.0642979
WBGene00003409	mrp-3	145.092	-0.136685	0.2062	-0.662876	0.50741	0.698536	1.08193	-1.08193	0.385718	-2.80497	0.00503218	0.00933957
WBGene00003410	mrp-4	1851.79	0.0232141	0.169357	0.137072	0.890974	0.944841	-1.49865	1.49865	0.198951	7.53279	4.96681e-14	5.17753e-13
WBGene00003411	mrp-5	570.661	0.135211	0.138927	0.973253	0.330428	0.540078	2.23884	-2.23884	0.226945	-9.86513	5.89603e-23	1.32527e-21
WBGene00003412	mrp-6	204.217	-0.18251	0.22141	-0.824308	0.409765	0.616135	1.26068	-1.26068	0.446706	-2.82216	0.00477019	0.00890345
WBGene00003413	mrp-7	982.273	-0.309775	0.170696	-1.81478	0.0695584	0.184594	-1.52742	1.52742	0.251806	6.06584	1.31262e-09	8.15184e-09
WBGene00003414	mrp-8	99.1619	0.533164	0.277647	1.9203	0.0548201	0.154232	0.394887	-0.394887	0.613708	-0.643444	0.519936	0.572173
WBGene00003415	mars-1	854.108	-0.22647	0.165965	-1.36456	0.17239	0.3521	-0.472608	0.472608	0.205258	2.30251	0.0213067	0.0339602
WBGene00003417	mrt-2	89.1796	-0.448103	0.251276	-1.78331	0.0745359	0.193864
WBGene00003418	msh-2	763.011	-0.601828	0.122663	-4.90635	9.2785e-07	1.18096e-05	-1.77753	1.77753	0.326241	5.44851	5.07948e-08	2.46406e-07
WBGene00003421	msh-5	294.064	-0.140562	0.176936	-0.794425	0.426948	0.631514	-0.369227	0.369227	0.442503	0.834405	0.404053	0.460312
WBGene00003422	msh-6	852.813	-0.849497	0.15031	-5.65162	1.58941e-08	2.82879e-07	-1.61577	1.61577	0.266635	6.05988	1.36227e-09	8.42711e-09
WBGene00003423	msi-1	281.695	-0.0620994	0.166907	-0.372061	0.709847	0.841009	0.407398	-0.407398	0.287383	-1.41761	0.156304	0.200369
WBGene00003429	msp-31	19.3104	1.80004	0.72511	2.48244	0.0130485	0.0496416	5.3143	-5.3143	0.811713	-6.54702	5.86973e-11	4.33626e-10
WBGene00003430	msp-32	9.8768	0.1334	0.665642	0.200408	0.841161	0.918245
WBGene00003435	msp-40	29.5943	1.85355	0.638508	2.90294	0.00369681	0.0174575	6.80536	-6.80536	1.01544	-6.7019	2.05723e-11	1.62931e-10
WBGene00003443	msp-50	16.9685	1.17855	0.61062	1.93008	0.0535967	0.151746	6.94422	-6.94422	1.13967	-6.09319	1.10683e-09	6.91182e-09
WBGene00003448	msp-55	8.10892	1.91333	0.77161	2.47966	0.0131508	1
WBGene00003452	msp-59	18.1893	2.63363	0.677795	3.88558	0.000102086	0.000797293	6.86114	-6.86114	1.11646	-6.14543	7.97447e-10	5.11297e-09
WBGene00003457	msp-64	11.1846	1.82523	0.795907	2.29327	0.0218322	0.0747811	6.44663	-6.44663	1.15138	-5.59906	2.15523e-08	1.10728e-07
WBGene00003463	msp-76	19.7436	0.849418	0.600047	1.41559	0.156897	0.330065	4.39971	-4.39971	0.951647	-4.62326	3.77748e-06	1.34446e-05
WBGene00003471	mtd-1	21.2692	0.341305	0.469783	0.726516	0.467523	0.666225
WBGene00003472	mtk-1	638.926	-0.304864	0.134487	-2.26687	0.0233979	0.0790749	-0.687979	0.687979	0.255648	2.69112	0.00712125	0.0127301
WBGene00003473	mtl-1	335.929	0.0627628	0.990735	0.0633497		1	2.5515	-2.5515	0.460696	-5.53835	3.05331e-08	1.53188e-07
WBGene00003474	mtl-2	675.21	-1.69525	0.127622	-13.2833	2.89366e-40	1.00268e-37	3.23847	-3.23847	0.179513	-18.0403	9.40507e-73	1.86032e-70
WBGene00003475	mtm-1	183.275	-0.492577	0.196966	-2.50082	0.0123905	0.0476725	0.221519	-0.221519	0.442284	-0.500854	0.616474	0.663792
WBGene00003476	mtm-3	1321.42	-0.127995	0.139517	-0.917416	0.358925	0.570083	-1.08341	1.08341	0.224468	4.82659	1.38892e-06	5.37104e-06
WBGene00003477	mtm-5	207.399	0.312986	0.215038	1.45549	0.145534	0.313768	1.55729	-1.55729	0.38003	-4.09781	4.17078e-05	0.000121589
WBGene00003478	mtm-6	399.999	0.112421	0.22624	0.496911	0.619252	0.783244	-1.29081	1.29081	0.352697	3.65983	0.000252382	0.000626167
WBGene00003479	mtm-9	533.204	-0.382004	0.129468	-2.95056	0.00317198	0.015357	-2.20621	2.20621	0.690028	3.19728	0.00138732	0.00291153
WBGene00003480	klf-3	161.523	-0.620129	0.178072	-3.48246	0.000496824	0.00313972	1.23635	-1.23635	0.333761	-3.7043	0.000211972	0.000534365
WBGene00003482	mua-3	869.843	0.220612	0.126829	1.73945	0.0819558	0.207908	1.1736	-1.1736	0.248461	-4.72346	2.31861e-06	8.61666e-06
WBGene00003485	mua-6	234.513	0.545097	0.18514	2.94424	0.00323749	0.0156341	1.57756	-1.57756	0.277163	-5.69182	1.2569e-08	6.69218e-08
WBGene00003495	mup-2	751.278	-0.738445	0.145863	-5.0626	4.13568e-07	5.70429e-06	2.00997	-2.00997	0.280663	-7.16151	7.97952e-13	7.46264e-12
WBGene00003497	mup-4	664.96	-0.0198324	0.115932	-0.171069	0.864169	0.932312	1.5515	-1.5515	0.255904	-6.0628	1.33773e-09	8.28826e-09
WBGene00003499	mut-2	264.46	-1.15559	0.206876	-5.58589	2.32501e-08	4.01591e-07	-1.91624	1.91624	0.469531	4.08118	4.48067e-05	0.000129588
WBGene00003504	mut-7	277.808	-0.786083	0.195979	-4.01106	6.04469e-05	0.000504586	-2.15716	2.15716	0.473328	4.55744	5.17811e-06	1.79218e-05
WBGene00003507	mut-14	191.073	-0.544748	0.197557	-2.75742	0.005826	0.0256268	0.123512	-0.123512	0.502961	-0.245569	0.806016	0.835587
WBGene00003508	mut-16	572.981	-0.482952	0.149186	-3.23726	0.00120684	0.00669858	-0.585388	0.585388	0.261997	2.23433	0.0254614	0.0397809
WBGene00003509	mxl-1	509.945	-0.198084	0.152686	-1.29732	0.19452	0.382573	-1.74306	1.74306	0.362018	4.81486	1.47305e-06	5.67695e-06
WBGene00003510	mxl-2	413.76	-0.543574	0.128867	-4.21809	2.46383e-05	0.000226862	-2.559	2.559	0.433463	5.90362	3.5561e-09	2.07952e-08
WBGene00003511	mxl-3	133.431	-0.0210101	0.22766	-0.0922873	0.92647	0.964435	2.70388	-2.70388	0.378692	-7.14005	9.32946e-13	8.68408e-12
WBGene00003514	myo-2	753.021	-0.28249	0.197168	-1.43274	0.151932	0.322216	1.01867	-1.01867	0.258247	-3.94456	7.99482e-05	0.000220094
WBGene00003515	myo-3	474.69	-0.433096	0.173677	-2.49368	0.0126426	0.0483682	0.886553	-0.886553	0.227348	-3.89954	9.63769e-05	0.0002615
WBGene00003516	nab-1	90.2474	0.785614	0.231911	3.38757	0.00070514	0.00423209	1.57377	-1.57377	0.475796	-3.30766	0.000940784	0.00205792
WBGene00003517	nac-1	52.0414	0.659683	0.359952	1.8327	0.0668474	0.178881
WBGene00003518	nac-2	76.2755	0.85443	0.242855	3.51827	0.000434371	0.00279717	2.57737	-2.57737	0.618588	-4.16654	3.09257e-05	9.25782e-05
WBGene00003519	nac-3	123.306	0.105156	0.202643	0.518925	0.603813	0.771348	1.60361	-1.60361	0.472436	-3.39434	0.000687946	0.00155337
WBGene00003520	nas-1	9.37657	0.419467	0.663494	0.632209	0.52725	0.713719
WBGene00003522	nas-3	47.3044	-0.29469	0.328052	-0.898303	0.369024	0.580384	3.20284	-3.20284	0.353052	-9.07185	1.17008e-19	2.04364e-18
WBGene00003523	nas-4	34.3107	0.842983	0.342746	2.4595	0.0139133	0.0524215
WBGene00003524	nas-5	66.8658	0.621939	0.256587	2.42389	0.0153553	0.0564815
WBGene00003525	nas-6	20.1545	-0.179768	0.507471	-0.354242	0.723158	0.849782
WBGene00003526	nas-7	70.7811	-0.0823376	0.322967	-0.254941	0.798768	0.895141
WBGene00003527	nas-8	12.4346	0.536379	0.574446	0.933733	0.350442	0.560542
WBGene00003528	nas-9	174.351	0.523846	0.178734	2.93087	0.00338015	0.0162031	0.94928	-0.94928	0.421544	-2.25191	0.0243278	0.0382211
WBGene00003529	nas-10	28.1901	0.0361292	0.391484	0.0922878	0.926469	0.964435
WBGene00003530	nas-11	592.961	0.556141	0.167093	3.32833	0.000873669	0.00508886	2.3564	-2.3564	0.268694	-8.76984	1.7892e-18	2.81435e-17
WBGene00003531	nas-12	57.3578	0.356002	0.400614	0.88864	0.374196	0.584443
WBGene00003533	nas-14	47.6893	0.639545	0.456509	1.40095	0.16123	0.336215
WBGene00003534	nas-15	18.0824	0.265804	0.530951	0.500619	0.616639	0.781005
WBGene00003539	nas-20	100.108	-1.79957	0.280489	-6.41586	1.40032e-10	3.62664e-09	4.39134	-4.39134	0.444936	-9.86959	5.6397e-23	1.2749e-21
WBGene00003540	nas-21	16.9087	-0.069644	0.698954	-0.0996404	0.92063	0.962095
WBGene00003541	nas-22	11.2843	-0.202747	0.633877	-0.319853	0.74908	0.865389
WBGene00003543	nas-24	27.0738	-0.318415	0.509049	-0.62551	0.531636	0.717184
WBGene00003544	nas-25	30.624	0.352682	0.381854	0.923605	0.355692	0.566697
WBGene00003545	nas-27	34.0184	0.151883	0.495383	0.306597	0.75915	0.871038
WBGene00003546	nas-28	31.6008	0.826601	0.447377	1.84766	0.0646514	0.174657
WBGene00003547	nas-29	28.6039	0.290292	0.472749	0.61405	0.539182	0.722555
WBGene00003548	nas-30	22.3178	0.234638	0.664535	0.353086	0.724024	0.85027
WBGene00003549	nas-31	81.2834	0.282341	0.29941	0.94299	0.345686	0.555973
WBGene00003550	nas-32	33.3017	0.555191	0.375965	1.47671	0.139753	0.304879
WBGene00003551	nas-33	26.9713	-0.566201	0.541353	-1.0459	0.295607	0.503422
WBGene00003552	nas-36	59.1096	0.354091	0.307469	1.15163	0.249472	0.452203
WBGene00003553	nas-37	117.779	0.243012	0.19108	1.27178	0.203451	0.393395
WBGene00003554	nas-38	9.06983	0.390698	0.691877	0.564693	0.572283	0.746928
WBGene00003555	nas-39	76.3734	1.10634	0.273415	4.04639	5.20134e-05	0.000440687	0.775258	-0.775258	0.603298	-1.28503	0.198781	0.247834
WBGene00003556	nas-40	29.2768	0.211265	0.468324	0.451108	0.651911	0.806187
WBGene00003558	nca-2	50.4481	0.489951	0.348838	1.40452	0.160163	0.334615
WBGene00003559	ncl-1	1524.54	-0.509959	0.177138	-2.87887	0.00399098	0.0186009	0.864946	-0.864946	0.155811	-5.55126	2.83625e-08	1.43481e-07
[truncated: 16,051 more rows]
