# Supplementary material for: Neuronal temperature perception induces specific defenses that enable C. elegans to cope with the enhanced reactivity of hydrogen peroxide at high temperature
Source: eLife. 2022 Oct 13;11:e78941. doi: 10.7554/eLife.78941 (PMC9635881; doi:10.7554/eLife.78941)
Supplement: Figure 4—source data 2. [file elife-78941-fig4-data2.xlsx]

## Sheet: Figure 4G
Figure 4G
unique region	gene	dataset	log2FoldChange	95% CI of log2FoldChange	adjusted P value	fold change
UR4	ctl-2	wild type 25°C / wild type 20°C	0.78677	0.199103	1.32e-07	1.72521
UR4	ctl-2	AFD(-) 20°C / wild type 20°C	0.919802	0.481338	0.024339	1.89186
UR3	ctl-1/2	wild type 25°C / wild type 20°C	1.13361	0.422363	0.000165006	2.19407
UR3	ctl-1/2	AFD(-) 20°C / wild type 20°C	1.58792	1.04155	0.0245579	3.00615
UR2	ctl-3/1	wild type 25°C / wild type 20°C	0.54522	0.192305	0.000165006	1.45924
UR2	ctl-3/1	AFD(-) 20°C / wild type 20°C	0.547871	0.322507	0.0245579	1.46193
UR1	ctl-3	wild type 25°C / wild type 20°C	-0.616396	0.680911	0.244406	0.652298
UR1	ctl-3	AFD(-) 20°C / wild type 20°C	-1.49826	2.01417	0.334454	0.35398
