# Supplementary material for: Neuronal temperature perception induces specific defenses that enable C. elegans to cope with the enhanced reactivity of hydrogen peroxide at high temperature
Source: eLife. 2022 Oct 13;11:e78941. doi: 10.7554/eLife.78941 (PMC9635881; doi:10.7554/eLife.78941)
Supplement: Figure 5—figure supplement 1—source data 1. [file elife-78941-fig5-figsupp1-data1.xlsx]

## Sheet: Figure 5S1
Figure 5S1
AFD(-) 20°C								AFD(-); tph-1(n4622) 20°C
Age at Death (d)	Survival	Failure	SurvStdErr	Number failed	Number censored	At Risk		Age at Death (d)	Survival	Failure	SurvStdErr	Number failed	Number censored	At Risk
0	1	0	0	0	0	133		0	1	0	0	0	0	133
1.65152	0.9925	0.0075	0.0075	1	0	133		0.34943	0.9925	0.0075	0.0075	1	0	133
2.31818	0.9774	0.0226	0.0129	2	0	132		1.60985	0.985	0.015	0.0106	1	0	132
2.33902	0.9699	0.0301	0.0148	1	0	130		1.71402	0.9774	0.0226	0.0129	1	0	131
2.53693	0.9624	0.0376	0.0165	1	0	129		1.83902	0.9699	0.0301	0.0148	1	0	130
2.58902	0.9549	0.0451	0.018	1	0	128		1.84943	0.9624	0.0376	0.0165	1	0	129
2.65152	0.9474	0.0526	0.0194	1	0	127		1.90152	0.9549	0.0451	0.018	1	0	128
2.67235	0.9398	0.0602	0.0206	1	0	126		2.00568	0.9474	0.0526	0.0194	1	0	127
2.8286	0.9323	0.0677	0.0218	1	0	125		2.18277	0.9398	0.0602	0.0206	1	0	126
3.15152	0.9248	0.0752	0.0229	1	0	124		2.19318	0.9323	0.0677	0.0218	1	0	125
3.16193	0.9173	0.0827	0.0239	1	0	123		2.21402	0.9248	0.0752	0.0229	1	0	124
3.21402	0.9098	0.0902	0.0248	1	0	122		2.23485	0.9173	0.0827	0.0239	1	0	123
3.25568	0.9023	0.0977	0.0258	1	0	121		2.24527	0.9098	0.0902	0.0248	1	0	122
3.29735	0.8947	0.1053	0.0266	1	0	120		2.38068	0.9023	0.0977	0.0258	1	0	121
3.3286	0.8797	0.1203	0.0282	2	0	119		2.69318	0.8947	0.1053	0.0266	1	0	120
3.34943	0.8722	0.1278	0.029	1	0	117		2.7661	0.8872	0.1128	0.0274	1	0	119
3.37027	0.8647	0.1353	0.0297	1	0	116		2.77652	0.8797	0.1203	0.0282	1	0	118
3.3911	0.8571	0.1429	0.0303	1	0	115		2.78693	0.8722	0.1278	0.029	1	0	117
3.40152	0.8496	0.1504	0.031	1	0	114		2.83902	0.8647	0.1353	0.0297	1	0	116
3.44318	0.8421	0.1579	0.0316	1	0	113		2.90152	0.8571	0.1429	0.0303	1	0	115
3.6411	0.8346	0.1654	0.0322	1	0	112		2.91193	0.8496	0.1504	0.031	1	0	114
3.66193	0.8271	0.1729	0.0328	1	0	111		2.93277	0.8421	0.1579	0.0316	1	0	113
3.67235	0.8195	0.1805	0.0333	1	0	110		2.9536	0.8346	0.1654	0.0322	1	0	112
3.7661	0.812	0.188	0.0339	1	0	109		2.98485	0.8271	0.1729	0.0328	1	0	111
3.8286	0.8045	0.1955	0.0344	1	0	108		3.13068	0.8195	0.1805	0.0333	1	0	110
3.93277	0.797	0.203	0.0349	1	0	107		3.17235	0.812	0.188	0.0339	1	0	109
3.94318	0.7895	0.2105	0.0354	1	0	106		3.19318	0.8045	0.1955	0.0344	1	0	108
3.97443	0.782	0.218	0.0358	1	0	105		3.30777	0.797	0.203	0.0349	1	0	107
3.98485	0.7744	0.2256	0.0362	1	0	104		3.3911	0.7895	0.2105	0.0354	1	0	106
4.00568	0.7519	0.2481	0.0375	3	0	103		3.46402	0.782	0.218	0.0358	1	0	105
4.04735	0.7368	0.2632	0.0382	2	0	100		3.53693	0.7744	0.2256	0.0362	1	0	104
4.13068	0.7293	0.2707	0.0385	1	0	98		3.60985	0.7669	0.2331	0.0367	1	0	103
4.1411	0.7218	0.2782	0.0389	1	0	97		3.73485	0.7594	0.2406	0.0371	1	0	102
4.15152	0.7143	0.2857	0.0392	1	0	96		3.75568	0.7519	0.2481	0.0375	1	0	101
4.17235	0.7068	0.2932	0.0395	1	0	95		3.7661	0.7444	0.2556	0.0378	1	0	100
4.18277	0.6992	0.3008	0.0398	1	0	94		3.92235	0.7368	0.2632	0.0382	1	0	99
4.25568	0.6917	0.3083	0.04	1	0	93		3.96402	0.7293	0.2707	0.0385	1	0	98
4.28693	0.6842	0.3158	0.0403	1	0	92		4.08902	0.6992	0.3008	0.0398	4	0	97
4.29735	0.6767	0.3233	0.0406	1	0	91		4.12027	0.6917	0.3083	0.04	1	0	93
4.31818	0.6692	0.3308	0.0408	1	0	90		4.1411	0.6842	0.3158	0.0403	1	0	92
4.33902	0.6541	0.3459	0.0412	2	0	89		4.15152	0.6767	0.3233	0.0406	1	0	91
4.37027	0.6466	0.3534	0.0414	1	0	87		4.17235	0.6617	0.3383	0.041	2	0	90
4.38068	0.6316	0.3684	0.0418	2	0	86		4.19318	0.6541	0.3459	0.0412	1	0	88
4.40152	0.6165	0.3835	0.0422	2	0	84		4.21402	0.6466	0.3534	0.0414	1	0	87
4.43277	0.609	0.391	0.0423	1	0	82		4.25568	0.6241	0.3759	0.042	3	0	86
4.44318	0.594	0.406	0.0426	2	0	81		4.33902	0.609	0.391	0.0423	2	0	83
4.50568	0.5865	0.4135	0.0427	1	0	79		4.35985	0.6015	0.3985	0.0425	1	0	81
4.53693	0.5789	0.4211	0.0428	1	0	78		4.38068	0.594	0.406	0.0426	1	0	80
4.54735	0.5639	0.4361	0.043	2	0	77		4.3911	0.5865	0.4135	0.0427	1	0	79
4.55777	0.5564	0.4436	0.0431	1	0	75		4.42235	0.5789	0.4211	0.0428	1	0	78
4.56818	0.5489	0.4511	0.0431	1	0	74		4.44318	0.5639	0.4361	0.043	2	0	77
4.5786	0.5414	0.4586	0.0432	1	0	73		4.48485	0.5489	0.4511	0.0431	2	0	75
4.58902	0.5338	0.4662	0.0433	1	0	72		4.49527	0.5414	0.4586	0.0432	1	0	73
4.7036	0.5263	0.4737	0.0433	1	0	71		4.52652	0.5338	0.4662	0.0433	1	0	72
4.74527	0.5188	0.4812	0.0433	1	0	70		4.53693	0.5188	0.4812	0.0433	2	0	71
4.75568	0.5113	0.4887	0.0433	1	0	69		4.54735	0.5113	0.4887	0.0433	1	0	69
4.77652	0.5038	0.4962	0.0434	1	0	68		4.56818	0.5038	0.4962	0.0434	1	0	68
4.80777	0.4962	0.5038	0.0434	1	0	67		4.62027	0.4887	0.5113	0.0433	2	0	67
4.81818	0.4887	0.5113	0.0433	1	0	66		4.67235	0.4812	0.5188	0.0433	1	0	65
4.8286	0.4812	0.5188	0.0433	1	0	65		4.69318	0.4737	0.5263	0.0433	1	0	64
4.84943	0.4737	0.5263	0.0433	1	0	64		4.81818	0.4662	0.5338	0.0433	1	0	63
4.8911	0.4662	0.5338	0.0433	1	0	63		4.8286	0.4586	0.5414	0.0432	1	0	62
4.91193	0.4586	0.5414	0.0432	1	0	62		4.84943	0.4436	0.5564	0.0431	2	0	61
4.92235	0.4511	0.5489	0.0431	1	0	61		4.87027	0.4361	0.5639	0.043	1	0	59
4.94318	0.4286	0.5714	0.0429	3	0	60		4.91193	0.4286	0.5714	0.0429	1	0	58
4.96402	0.4211	0.5789	0.0428	1	0	57		4.93277	0.4211	0.5789	0.0428	1	0	57
4.98485	0.4135	0.5865	0.0427	1	0	56		4.94318	0.4135	0.5865	0.0427	1	0	56
4.99527	0.3985	0.6015	0.0425	2	0	55		4.96402	0.406	0.594	0.0426	1	0	55
5.0161	0.391	0.609	0.0423	1	0	53		5.02652	0.3985	0.6015	0.0425	1	0	54
5.03693	0.3835	0.6165	0.0422	1	0	52		5.0786	0.391	0.609	0.0423	1	0	53
5.04735	0.3759	0.6241	0.042	1	0	51		5.09943	0.3759	0.6241	0.042	2	0	52
5.05777	0.3684	0.6316	0.0418	1	0	50		5.10985	0.3684	0.6316	0.0418	1	0	50
5.16193	0.3609	0.6391	0.0416	1	0	49		5.1411	0.3609	0.6391	0.0416	1	0	49
5.18277	0.3534	0.6466	0.0414	1	0	48		5.17235	0.3534	0.6466	0.0414	1	0	48
5.2036	0.3459	0.6541	0.0412	1	0	47		5.18277	0.3459	0.6541	0.0412	1	0	47
5.23485	0.3383	0.6617	0.041	1	0	46		5.19318	0.3383	0.6617	0.041	1	0	46
5.29735	0.3308	0.6692	0.0408	1	0	45		5.24527	0.3308	0.6692	0.0408	1	0	45
5.37027	0.3233	0.6767	0.0406	1	0	44		5.25568	0.3233	0.6767	0.0406	1	0	44
5.38068	0.3158	0.6842	0.0403	1	0	43		5.27652	0.3158	0.6842	0.0403	1	0	43
5.40152	0.3083	0.6917	0.04	1	0	42		5.28693	0.3083	0.6917	0.04	1	0	42
5.4536	0.3008	0.6992	0.0398	1	0	41		5.37027	0.3008	0.6992	0.0398	1	0	41
5.48485	0.2857	0.7143	0.0392	2	0	40		5.38068	0.2932	0.7068	0.0395	1	0	40
5.5161	0.2782	0.7218	0.0389	1	0	38		5.41193	0.2857	0.7143	0.0392	1	0	39
5.53693	0.2707	0.7293	0.0385	1	0	37		5.43277	0.2782	0.7218	0.0389	1	0	38
5.55777	0.2632	0.7368	0.0382	1	0	36		5.46402	0.2707	0.7293	0.0385	1	0	37
5.56818	0.2556	0.7444	0.0378	1	0	35		5.55777	0.2632	0.7368	0.0382	1	0	36
5.62027	0.2481	0.7519	0.0375	1	0	34		5.58902	0.2556	0.7444	0.0378	1	0	35
5.66193	0.2406	0.7594	0.0371	1	0	33		5.62027	0.2481	0.7519	0.0375	1	0	34
5.74527	0.2331	0.7669	0.0367	1	0	32		5.7036	0.2406	0.7594	0.0371	1	0	33
5.7661	0.2256	0.7744	0.0362	1	0	31		5.71402	0.2331	0.7669	0.0367	1	0	32
5.8286	0.2105	0.7895	0.0354	2	0	30		5.80777	0.2256	0.7744	0.0362	1	0	31
5.83902	0.203	0.797	0.0349	1	0	28		5.81818	0.218	0.782	0.0358	1	0	30
5.8911	0.1955	0.8045	0.0344	1	0	27		5.8286	0.2105	0.7895	0.0354	1	0	29
5.93277	0.1805	0.8195	0.0333	2	0	26		5.87027	0.203	0.797	0.0349	1	0	28
5.9536	0.1729	0.8271	0.0328	1	0	24		5.99527	0.1955	0.8045	0.0344	1	0	27
5.98485	0.1654	0.8346	0.0322	1	0	23		6.03693	0.188	0.812	0.0339	1	0	26
6.02652	0.1579	0.8421	0.0316	1	0	22		6.1411	0.1654	0.8346	0.0322	3	0	25
6.09943	0.1504	0.8496	0.031	1	0	21		6.16193	0.1579	0.8421	0.0316	1	0	22
6.13068	0.1429	0.8571	0.0303	1	0	20		6.24527	0.1504	0.8496	0.031	1	0	21
6.1411	0.1353	0.8647	0.0297	1	0	19		6.30777	0.1429	0.8571	0.0303	1	0	20
6.17235	0.1278	0.8722	0.029	1	0	18		6.34943	0.1353	0.8647	0.0297	1	0	19
6.31818	0.1203	0.8797	0.0282	1	0	17		6.44318	0.1278	0.8722	0.029	1	0	18
6.33902	0.1128	0.8872	0.0274	1	0	16		6.46402	0.1203	0.8797	0.0282	1	0	17
6.37027	0.1053	0.8947	0.0266	1	0	15		6.5161	0.1128	0.8872	0.0274	1	0	16
6.3911	0.0977	0.9023	0.0258	1	0	14		6.72443	0.1053	0.8947	0.0266	1	0	15
6.84943	0.0902	0.9098	0.0248	1	0	13		6.79735	0.0977	0.9023	0.0258	1	0	14
6.85985	0.0827	0.9173	0.0239	1	0	12		6.91193	0.0902	0.9098	0.0248	1	0	13
6.93277	0.0752	0.9248	0.0229	1	0	11		6.97443	0.0827	0.9173	0.0239	1	0	12
7.2036	0.0677	0.9323	0.0218	1	0	10		6.99527	0.0752	0.9248	0.0229	1	0	11
7.23485	0.0602	0.9398	0.0206	1	0	9		7.05777	0.0677	0.9323	0.0218	1	0	10
7.27652	0.0526	0.9474	0.0194	1	0	8		7.2661	0.0602	0.9398	0.0206	1	0	9
7.37027	0.0451	0.9549	0.018	1	0	7		7.29735	0.0526	0.9474	0.0194	1	0	8
7.3911	0.0376	0.9624	0.0165	1	0	6		7.49527	0.0376	0.9624	0.0165	2	0	7
7.54735	0.0301	0.9699	0.0148	1	0	5		7.55777	0.0301	0.9699	0.0148	1	0	5
7.62027	0.0226	0.9774	0.0129	1	0	4		7.9536	0.0226	0.9774	0.0129	1	0	4
8.23485	0.015	0.985	0.0106	1	0	3		8.0786	0.015	0.985	0.0106	1	0	3
8.2661	0.0075	0.9925	0.0075	1	0	2		8.09943	0.0075	0.9925	0.0075	1	0	2
8.47443	0	1	0	1	0	1		8.49527	0	1	0	1	0	1
