# Supplementary material for: Neuronal temperature perception induces specific defenses that enable C. elegans to cope with the enhanced reactivity of hydrogen peroxide at high temperature
Source: eLife. 2022 Oct 13;11:e78941. doi: 10.7554/eLife.78941 (PMC9635881; doi:10.7554/eLife.78941)
Supplement: Figure 5—source data 1. [file elife-78941-fig5-data1.xlsx]

## Sheet: Figure 5F
Figure 5F
wild type 20°C								ins-39(tm6467) 20°C								ins-39(tm6467); witEx9[Pgcy-8::ins-39 + Punc-122::GFP] 20°C								ins-39(tm6467); witEx10[Pgcy-8::ins-39 + Punc-122::GFP] 20°C
Age at Death (d)	Survival	Failure	SurvStdErr	Number failed	Number censored	At Risk		Age at Death (d)	Survival	Failure	SurvStdErr	Number failed	Number censored	At Risk		Age at Death (d)	Survival	Failure	SurvStdErr	Number failed	Number censored	At Risk		Age at Death (d)	Survival	Failure	SurvStdErr	Number failed	Number censored	At Risk
0	1	0	0	0	0	130		0	1	0	0	0	0	94		0	1	0	0	0	0	153		0	1	0	0	0	0	59
1.07748	0.9923	0.0077	0.0077	1	0	130		0.07748	0.9894	0.0106	0.0106	1	0	94		0.08789	0.9935	0.0065	0.0065	1	0	153		0.07748	0.9831	0.0169	0.0168	1	0	59
1.15039	0.9846	0.0154	0.0108	1	0	129		0.27539	0.9787	0.0213	0.0149	1	0	93		0.10873	0.9869	0.0131	0.0092	1	0	152		0.10873	0.9661	0.0339	0.0236	1	0	58
1.21289	0.9769	0.0231	0.0132	1	0	128		1.70248	0.9681	0.0319	0.0181	1	0	92		0.33789	0.9804	0.0196	0.0112	1	0	151		0.66081	0.9492	0.0508	0.0286	1	0	57
1.29623	0.9692	0.0308	0.0151	1	0	127		1.79623	0.9574	0.0426	0.0208	1	0	91		0.84831	0.9739	0.0261	0.0129	1	0	150		0.80664	0.9322	0.0678	0.0327	1	0	56
1.30664	0.9615	0.0385	0.0169	1	0	126		2.05664	0.9468	0.0532	0.0231	1	0	90		0.92123	0.9608	0.0392	0.0157	2	0	149		0.90039	0.9153	0.0847	0.0363	1	0	55
1.37956	0.9538	0.0462	0.0184	1	0	125		2.07748	0.9362	0.0638	0.0252	1	0	89		0.94206	0.9477	0.0523	0.018	2	0	147		0.98373	0.8983	0.1017	0.0393	1	0	54
1.38998	0.9462	0.0538	0.0198	1	0	124		2.09831	0.9255	0.0745	0.0271	1	0	88		0.96289	0.9412	0.0588	0.019	1	0	145		0.99414	0.8814	0.1186	0.0421	1	0	53
1.42123	0.9385	0.0615	0.0211	1	0	123		2.12956	0.9149	0.0851	0.0288	1	0	87		0.98373	0.9346	0.0654	0.02	1	0	144		1.05664	0.8644	0.1356	0.0446	1	0	52
1.46289	0.9308	0.0692	0.0223	1	0	122		2.13998	0.8936	0.1064	0.0318	2	0	86		0.99414	0.9281	0.0719	0.0209	1	0	143		1.06706	0.8475	0.1525	0.0468	1	0	51
1.50456	0.9231	0.0769	0.0234	1	0	121		2.15039	0.883	0.117	0.0332	1	0	84		1.00456	0.9216	0.0784	0.0217	1	0	142		1.07748	0.8305	0.1695	0.0488	1	0	50
1.52539	0.9154	0.0846	0.0244	1	0	120		2.17123	0.8723	0.1277	0.0344	1	0	83		1.02539	0.902	0.098	0.024	3	0	141		1.08789	0.7966	0.2034	0.0524	2	0	49
1.53581	0.9077	0.0923	0.0254	1	0	119		2.18164	0.8617	0.1383	0.0356	1	0	82		1.03581	0.8954	0.1046	0.0247	1	0	138		1.09831	0.7797	0.2203	0.054	1	0	47
1.54623	0.8846	0.1154	0.028	3	0	118		2.19206	0.8404	0.1596	0.0378	2	0	81		1.04623	0.8693	0.1307	0.0273	4	0	137		1.10873	0.7458	0.2542	0.0567	2	0	46
1.57748	0.8769	0.1231	0.0288	1	0	115		2.20248	0.8191	0.1809	0.0397	2	0	79		1.05664	0.8497	0.1503	0.0289	3	0	133		1.11914	0.7288	0.2712	0.0579	1	0	44
1.60873	0.8692	0.1308	0.0296	1	0	114		2.23373	0.7872	0.2128	0.0422	3	0	77		1.06706	0.8431	0.1569	0.0294	1	0	130		1.12956	0.7119	0.2881	0.059	1	0	43
1.63998	0.8615	0.1385	0.0303	1	0	113		2.24414	0.7553	0.2447	0.0443	3	0	74		1.07748	0.8105	0.1895	0.0317	5	0	129		1.13998	0.6949	0.3051	0.0599	1	0	42
1.65039	0.8462	0.1538	0.0316	2	0	112		2.26498	0.7234	0.2766	0.0461	3	0	71		1.08789	0.8039	0.1961	0.0321	1	0	124		1.15039	0.661	0.339	0.0616	2	0	41
1.67123	0.8308	0.1692	0.0329	2	0	110		2.28581	0.6702	0.3298	0.0485	5	0	68		1.09831	0.7974	0.2026	0.0325	1	0	123		1.16081	0.6441	0.3559	0.0623	1	0	39
1.69206	0.8	0.2	0.0351	4	0	108		2.29623	0.617	0.383	0.0501	5	0	63		1.10873	0.7778	0.2222	0.0336	3	0	122		1.21289	0.6271	0.3729	0.063	1	0	38
1.70248	0.7923	0.2077	0.0356	1	0	104		2.30664	0.5957	0.4043	0.0506	2	0	58		1.11914	0.7712	0.2288	0.034	1	0	119		1.24414	0.5932	0.4068	0.064	2	0	37
1.71289	0.7846	0.2154	0.0361	1	0	103		2.31706	0.5745	0.4255	0.051	2	0	56		1.12956	0.7647	0.2353	0.0343	1	0	118		1.25456	0.5593	0.4407	0.0646	2	0	35
1.73373	0.7692	0.2308	0.037	2	0	102		2.33789	0.5638	0.4362	0.0511	1	0	54		1.13998	0.7582	0.2418	0.0346	1	0	117		1.27539	0.5254	0.4746	0.065	2	0	33
1.74414	0.7462	0.2538	0.0382	3	0	100		2.34831	0.5426	0.4574	0.0514	2	0	53		1.15039	0.7255	0.2745	0.0361	5	0	116		1.29623	0.5085	0.4915	0.0651	1	0	31
1.75456	0.7077	0.2923	0.0399	5	0	97		2.35873	0.5213	0.4787	0.0515	2	0	51		1.16081	0.719	0.281	0.0363	1	0	111		1.30664	0.4915	0.5085	0.0651	1	0	30
1.76498	0.6923	0.3077	0.0405	2	0	92		2.36914	0.5106	0.4894	0.0516	1	0	49		1.17123	0.6863	0.3137	0.0375	5	0	110		1.31706	0.4407	0.5593	0.0646	3	0	29
1.77539	0.6846	0.3154	0.0408	1	0	90		2.37956	0.4681	0.5319	0.0515	4	0	48		1.18164	0.6667	0.3333	0.0381	3	0	105		1.32748	0.4237	0.5763	0.0643	1	0	26
1.79623	0.6538	0.3462	0.0417	4	0	89		2.38998	0.4574	0.5426	0.0514	1	0	44		1.19206	0.6405	0.3595	0.0388	4	0	102		1.36914	0.3729	0.6271	0.063	3	0	25
1.80664	0.6385	0.3615	0.0421	2	0	85		2.41081	0.4468	0.5532	0.0513	1	0	43		1.20248	0.6275	0.3725	0.0391	2	0	98		1.46289	0.339	0.661	0.0616	2	0	22
1.81706	0.5923	0.4077	0.0431	6	0	83		2.42123	0.4149	0.5851	0.0508	3	0	42		1.21289	0.6078	0.3922	0.0395	3	0	96		1.47331	0.322	0.678	0.0608	1	0	20
1.82748	0.5846	0.4154	0.0432	1	0	77		2.43164	0.383	0.617	0.0501	3	0	39		1.22331	0.5882	0.4118	0.0398	3	0	93		1.50456	0.3051	0.6949	0.0599	1	0	19
1.84831	0.5615	0.4385	0.0435	3	0	76		2.44206	0.3298	0.6702	0.0485	5	0	36		1.23373	0.5817	0.4183	0.0399	1	0	90		1.51498	0.2881	0.7119	0.059	1	0	18
1.85873	0.5385	0.4615	0.0437	3	0	73		2.45248	0.3191	0.6809	0.0481	1	0	31		1.24414	0.5686	0.4314	0.04	2	0	89		1.55664	0.2712	0.7288	0.0579	1	0	17
1.86914	0.5154	0.4846	0.0438	3	0	70		2.46289	0.3085	0.6915	0.0476	1	0	30		1.27539	0.549	0.451	0.0402	3	0	87		1.56706	0.2203	0.7797	0.054	3	0	16
1.87956	0.5	0.5	0.0439	2	0	67		2.47331	0.2979	0.7021	0.0472	1	0	29		1.28581	0.5294	0.4706	0.0404	3	0	84		1.58789	0.2034	0.7966	0.0524	1	0	13
1.88998	0.4846	0.5154	0.0438	2	0	65		2.48373	0.2766	0.7234	0.0461	2	0	28		1.29623	0.4837	0.5163	0.0404	7	0	81		1.60873	0.1864	0.8136	0.0507	1	0	12
1.90039	0.4462	0.5538	0.0436	5	0	63		2.49414	0.266	0.734	0.0456	1	0	26		1.30664	0.4706	0.5294	0.0404	2	0	74		1.63998	0.1695	0.8305	0.0488	1	0	11
1.91081	0.4154	0.5846	0.0432	4	0	58		2.50456	0.2553	0.7447	0.045	1	0	25		1.31706	0.4641	0.5359	0.0403	1	0	72		1.65039	0.1525	0.8475	0.0468	1	0	10
1.92123	0.3692	0.6308	0.0423	6	0	54		2.51498	0.2234	0.7766	0.043	3	0	24		1.32748	0.451	0.549	0.0402	2	0	71		1.67123	0.1356	0.8644	0.0446	1	0	9
1.93164	0.3615	0.6385	0.0421	1	0	48		2.52539	0.2128	0.7872	0.0422	1	0	21		1.33789	0.4379	0.5621	0.0401	2	0	69		1.69206	0.1186	0.8814	0.0421	1	0	8
1.94206	0.3538	0.6462	0.0419	1	0	47		2.54623	0.2021	0.7979	0.0414	1	0	20		1.34831	0.4248	0.5752	0.04	2	0	67		1.70248	0.1017	0.8983	0.0393	1	0	7
1.95248	0.3462	0.6538	0.0417	1	0	46		2.58789	0.1809	0.8191	0.0397	2	0	19		1.35873	0.4118	0.5882	0.0398	2	0	65		1.73373	0.0847	0.9153	0.0363	1	0	6
1.97331	0.3231	0.6769	0.041	3	0	45		2.60873	0.1596	0.8404	0.0378	2	0	17		1.36914	0.4052	0.5948	0.0397	1	0	63		1.78581	0.0678	0.9322	0.0327	1	0	5
1.98373	0.2923	0.7077	0.0399	4	0	42		2.61914	0.1383	0.8617	0.0356	2	0	15		1.37956	0.3856	0.6144	0.0394	3	0	62		1.81706	0.0508	0.9492	0.0286	1	0	4
1.99414	0.2692	0.7308	0.0389	3	0	38		2.63998	0.1064	0.8936	0.0318	3	0	13		1.38998	0.366	0.634	0.0389	3	0	59		1.84831	0.0508	0.9492	0.0286	0	3	3
2.01498	0.2538	0.7462	0.0382	2	0	35		2.65039	0.0851	0.9149	0.0288	2	0	10		1.40039	0.3464	0.6536	0.0385	3	0	56
2.02539	0.2385	0.7615	0.0374	2	0	33		2.68164	0.0638	0.9362	0.0252	2	0	8		1.41081	0.3399	0.6601	0.0383	1	0	53
2.03581	0.2077	0.7923	0.0356	4	0	31		2.74414	0.0319	0.9681	0.0181	3	0	6		1.42123	0.3333	0.6667	0.0381	1	0	52
2.04623	0.1923	0.8077	0.0346	2	0	27		2.75456	0.0213	0.9787	0.0149	1	0	3		1.43164	0.3072	0.6928	0.0373	4	0	51
2.05664	0.1615	0.8385	0.0323	4	0	25		2.77539	0.0106	0.9894	0.0106	1	0	2		1.45248	0.2941	0.7059	0.0368	2	0	47
2.07748	0.1462	0.8538	0.031	2	0	21		2.87956	0	1	0	1	0	1		1.46289	0.281	0.719	0.0363	2	0	45
2.08789	0.1385	0.8615	0.0303	1	0	19										1.47331	0.2614	0.7386	0.0355	3	0	43
2.09831	0.1077	0.8923	0.0272	4	0	18										1.49414	0.2484	0.7516	0.0349	2	0	40
2.12956	0.0923	0.9077	0.0254	2	0	14										1.51498	0.2418	0.7582	0.0346	1	0	38
2.13998	0.0692	0.9308	0.0223	3	0	12										1.56706	0.2353	0.7647	0.0343	1	0	37
2.16081	0.0615	0.9385	0.0211	1	0	9										1.57748	0.2288	0.7712	0.034	1	0	36
2.17123	0.0538	0.9462	0.0198	1	0	8										1.59831	0.2092	0.7908	0.0329	3	0	35
2.18164	0.0385	0.9615	0.0169	2	0	7										1.60873	0.2026	0.7974	0.0325	1	23	32
2.19206	0.0308	0.9692	0.0151	1	0	5										1.63998	0.1773	0.8227	0.037	1	0	8
2.20248	0.0231	0.9769	0.0132	1	0	4										1.75456	0.152	0.848	0.0394	1	0	7
2.24414	0.0077	0.9923	0.0077	2	0	3										1.76498	0.1013	0.8987	0.0393	2	0	6
2.28581	0	1	0	1	0	1										1.79623	0.076	0.924	0.0368	1	0	4
																1.81706	0.0507	0.9493	0.0321	1	0	3
																1.82748	0.0253	0.9747	0.024	1	0	2
																1.90039	0	1	0	1	0	1

## Sheet: Figure 5G
Figure 5G
wild type 20°C → 20°C								wild type 25°C → 20°C								ins-39(tm6467) 20°C → 20°C								ins-39(tm6467) 25°C → 20°C
Age at Death (d)	Survival	Failure	SurvStdErr	Number failed	Number censored	At Risk		Age at Death (d)	Survival	Failure	SurvStdErr	Number failed	Number censored	At Risk		Age at Death (d)	Survival	Failure	SurvStdErr	Number failed	Number censored	At Risk		Age at Death (d)	Survival	Failure	SurvStdErr	Number failed	Number censored	At Risk
0	1	0	0	0	0	102		0	1	0	0	0	0	129		0	1	0	0	0	0	158		0	1	0	0	0	0	124
1.30841	0.9902	0.0098	0.0098	1	0	102		0.08966	0.9845	0.0155	0.0109	2	0	129		0.07925	0.9873	0.0127	0.0089	2	0	158		0.1105	0.9919	0.0081	0.008	1	0	124
1.35008	0.9804	0.0196	0.0137	1	0	101		1.26675	0.9767	0.0233	0.0133	1	0	127		1.27716	0.981	0.019	0.0109	1	0	156		0.14175	0.9839	0.0161	0.0113	1	0	123
1.423	0.9608	0.0392	0.0192	2	0	100		1.53758	0.969	0.031	0.0153	1	0	126		1.33966	0.9747	0.0253	0.0125	1	0	155		1.58966	0.9758	0.0242	0.0138	1	0	122
1.47508	0.951	0.049	0.0214	1	0	98		2.15216	0.9612	0.0388	0.017	1	0	125		1.47508	0.9684	0.0316	0.0139	1	0	154		1.83966	0.9677	0.0323	0.0159	1	0	121
1.4855	0.9412	0.0588	0.0233	1	0	97		2.24591	0.9535	0.0465	0.0185	1	0	124		1.51675	0.962	0.038	0.0152	1	0	153		1.88133	0.9597	0.0403	0.0177	1	0	120
1.50633	0.9314	0.0686	0.025	1	0	96		2.25633	0.9457	0.0543	0.0199	1	0	123		1.62091	0.9557	0.0443	0.0164	1	0	152		1.9855	0.9516	0.0484	0.0193	1	0	119
1.51675	0.9118	0.0882	0.0281	2	0	95		2.37091	0.938	0.062	0.0212	1	0	122		1.63133	0.9494	0.0506	0.0174	1	0	151		2.048	0.9435	0.0565	0.0207	1	0	118
1.52716	0.902	0.098	0.0294	1	0	93		2.38133	0.9302	0.0698	0.0224	1	0	121		1.673	0.9367	0.0633	0.0194	2	0	150		2.05841	0.9355	0.0645	0.0221	1	0	117
1.55841	0.8922	0.1078	0.0307	1	0	92		2.39175	0.9225	0.0775	0.0235	1	0	120		1.70425	0.9304	0.0696	0.0202	1	0	148		2.07925	0.9274	0.0726	0.0233	1	0	116
1.56883	0.8824	0.1176	0.0319	1	0	91		2.40216	0.8992	0.1008	0.0265	3	0	119		1.798	0.9241	0.0759	0.0211	1	0	147		2.2355	0.9194	0.0806	0.0245	1	0	115
1.57925	0.8725	0.1275	0.033	1	0	90		2.41258	0.8915	0.1085	0.0274	1	0	116		1.81883	0.9177	0.0823	0.0219	1	0	146		2.25633	0.9113	0.0887	0.0255	1	0	114
1.58966	0.8627	0.1373	0.0341	1	0	89		2.423	0.8837	0.1163	0.0282	1	0	115		1.82925	0.9114	0.0886	0.0226	1	0	145		2.45425	0.9032	0.0968	0.0266	1	0	113
1.60008	0.8431	0.1569	0.036	2	0	88		2.43341	0.876	0.124	0.029	1	0	114		1.8605	0.9051	0.0949	0.0233	1	0	144		2.47508	0.8952	0.1048	0.0275	1	0	112
1.65216	0.8137	0.1863	0.0385	3	0	86		2.44383	0.8605	0.1395	0.0305	2	0	113		1.89175	0.8987	0.1013	0.024	1	0	143		2.4855	0.879	0.121	0.0293	2	0	111
1.673	0.8039	0.1961	0.0393	1	0	83		2.46466	0.8527	0.1473	0.0312	1	0	111		1.90216	0.8924	0.1076	0.0247	1	0	142		2.50633	0.871	0.129	0.0301	1	0	109
1.69383	0.7941	0.2059	0.04	1	0	82		2.47508	0.845	0.155	0.0319	1	0	110		1.95425	0.8861	0.1139	0.0253	1	0	141		2.51675	0.8629	0.1371	0.0309	1	0	108
1.70425	0.7843	0.2157	0.0407	1	0	81		2.53758	0.8372	0.1628	0.0325	1	0	109		1.96466	0.8797	0.1203	0.0259	1	0	140		2.56883	0.8548	0.1452	0.0316	1	0	107
1.71466	0.7549	0.2451	0.0426	3	0	80		2.548	0.8295	0.1705	0.0331	1	0	108		1.9855	0.8734	0.1266	0.0265	1	0	139		2.60008	0.8468	0.1532	0.0323	1	0	106
1.7355	0.7451	0.2549	0.0432	1	0	77		2.58966	0.814	0.186	0.0343	2	0	107		1.99591	0.8608	0.1392	0.0275	2	0	138		2.63133	0.8387	0.1613	0.033	1	0	105
1.75633	0.7255	0.2745	0.0442	2	0	76		2.60008	0.8062	0.1938	0.0348	1	0	105		2.00633	0.8544	0.1456	0.0281	1	0	136		2.673	0.8306	0.1694	0.0337	1	0	104
1.76675	0.6961	0.3039	0.0455	3	0	74		2.6105	0.7829	0.2171	0.0363	3	0	104		2.01675	0.8418	0.1582	0.029	2	0	135		2.69383	0.8226	0.1774	0.0343	1	0	103
1.77716	0.6863	0.3137	0.0459	1	0	71		2.62091	0.7752	0.2248	0.0368	1	0	101		2.02716	0.8291	0.1709	0.0299	2	0	133		2.71466	0.8065	0.1935	0.0355	2	0	102
1.78758	0.6765	0.3235	0.0463	1	0	70		2.63133	0.7674	0.2326	0.0372	1	0	100		2.048	0.8228	0.1772	0.0304	1	0	131		2.72508	0.7984	0.2016	0.036	1	0	100
1.798	0.6667	0.3333	0.0467	1	0	69		2.65216	0.7597	0.2403	0.0376	1	0	99		2.06883	0.7975	0.2025	0.032	4	0	130		2.76675	0.7742	0.2258	0.0375	3	0	99
1.80841	0.6373	0.3627	0.0476	3	0	68		2.7355	0.7442	0.2558	0.0384	2	0	98		2.07925	0.7848	0.2152	0.0327	2	0	126		2.77716	0.7661	0.2339	0.038	1	0	96
1.81883	0.6078	0.3922	0.0483	3	0	65		2.75633	0.7364	0.2636	0.0388	1	0	96		2.08966	0.7785	0.2215	0.033	1	0	124		2.80841	0.7581	0.2419	0.0385	1	0	95
1.83966	0.5882	0.4118	0.0487	2	0	62		2.77716	0.7132	0.2868	0.0398	3	0	95		2.10008	0.7595	0.2405	0.034	3	0	123		2.83966	0.75	0.25	0.0389	1	0	94
1.85008	0.5784	0.4216	0.0489	1	0	60		2.798	0.6899	0.3101	0.0407	3	0	92		2.1105	0.7532	0.2468	0.0343	1	0	120		2.85008	0.7419	0.2581	0.0393	1	0	93
1.88133	0.549	0.451	0.0493	3	0	59		2.80841	0.6822	0.3178	0.041	1	0	89		2.12091	0.7468	0.2532	0.0346	1	0	119		2.89175	0.7339	0.2661	0.0397	1	0	92
1.89175	0.5294	0.4706	0.0494	2	0	56		2.81883	0.6744	0.3256	0.0413	1	0	88		2.15216	0.7405	0.2595	0.0349	1	0	118		2.90216	0.7258	0.2742	0.0401	1	0	91
1.90216	0.4706	0.5294	0.0494	6	0	54		2.83966	0.6667	0.3333	0.0415	1	0	87		2.19383	0.7342	0.2658	0.0351	1	0	117		2.91258	0.7177	0.2823	0.0404	1	0	90
1.91258	0.4608	0.5392	0.0494	1	0	48		2.87091	0.6512	0.3488	0.042	2	0	86		2.21466	0.7278	0.2722	0.0354	1	0	116		2.923	0.7016	0.2984	0.0411	2	0	89
1.923	0.451	0.549	0.0493	1	0	47		2.89175	0.6434	0.3566	0.0422	1	0	84		2.24591	0.7089	0.2911	0.0361	3	0	115		2.94383	0.6935	0.3065	0.0414	1	0	87
1.93341	0.4314	0.5686	0.049	2	0	46		2.91258	0.6357	0.3643	0.0424	1	0	83		2.25633	0.6962	0.3038	0.0366	2	0	112		2.96466	0.6855	0.3145	0.0417	1	0	86
1.94383	0.402	0.598	0.0485	3	0	44		2.923	0.6279	0.3721	0.0426	1	0	82		2.28758	0.6899	0.3101	0.0368	1	0	110		2.9855	0.6774	0.3226	0.042	1	0	85
1.96466	0.3824	0.6176	0.0481	2	0	41		2.93341	0.6124	0.3876	0.0429	2	0	81		2.298	0.6835	0.3165	0.037	1	0	109		3.01675	0.6613	0.3387	0.0425	2	0	84
1.97508	0.3627	0.6373	0.0476	2	0	39		2.94383	0.6047	0.3953	0.043	1	0	79		2.31883	0.6582	0.3418	0.0377	4	0	108		3.02716	0.6532	0.3468	0.0427	1	0	82
1.9855	0.3529	0.6471	0.0473	1	0	37		2.95425	0.5969	0.4031	0.0432	1	0	78		2.33966	0.6456	0.3544	0.0381	2	0	104		3.048	0.6452	0.3548	0.043	1	0	81
1.99591	0.3431	0.6569	0.047	1	0	36		2.96466	0.5891	0.4109	0.0433	1	0	77		2.35008	0.6329	0.3671	0.0383	2	0	102		3.10008	0.6371	0.3629	0.0432	1	0	80
2.00633	0.3333	0.6667	0.0467	1	0	35		2.97508	0.5814	0.4186	0.0434	1	0	76		2.3605	0.6266	0.3734	0.0385	1	0	100		3.173	0.629	0.371	0.0434	1	0	79
2.01675	0.3235	0.6765	0.0463	1	0	34		2.9855	0.5659	0.4341	0.0436	2	0	75		2.37091	0.6139	0.3861	0.0387	2	0	99		3.20425	0.621	0.379	0.0436	1	0	78
2.02716	0.2843	0.7157	0.0447	4	0	33		3.00633	0.5581	0.4419	0.0437	1	0	73		2.40216	0.6013	0.3987	0.039	2	0	97		3.2355	0.6129	0.3871	0.0437	1	0	77
2.048	0.2745	0.7255	0.0442	1	0	29		3.01675	0.5504	0.4496	0.0438	1	0	72		2.41258	0.5886	0.4114	0.0391	2	0	95		3.27716	0.5726	0.4274	0.0444	5	0	76
2.10008	0.2549	0.7451	0.0432	2	0	28		3.02716	0.5426	0.4574	0.0439	1	0	71		2.423	0.5823	0.4177	0.0392	1	0	93		3.30841	0.5645	0.4355	0.0445	1	0	71
2.1105	0.2353	0.7647	0.042	2	0	26		3.048	0.5349	0.4651	0.0439	1	0	70		2.44383	0.5759	0.4241	0.0393	1	0	92		3.31883	0.5565	0.4435	0.0446	1	0	70
2.13133	0.2255	0.7745	0.0414	1	0	24		3.07925	0.5039	0.4961	0.044	4	0	69		2.45425	0.5633	0.4367	0.0395	2	0	91		3.33966	0.5403	0.4597	0.0448	2	0	69
2.14175	0.2157	0.7843	0.0407	1	0	23		3.10008	0.4884	0.5116	0.044	2	0	65		2.46466	0.557	0.443	0.0395	1	0	89		3.3605	0.5323	0.4677	0.0448	1	0	67
2.173	0.1961	0.8039	0.0393	2	0	22		3.12091	0.4806	0.5194	0.044	1	0	63		2.49591	0.5443	0.4557	0.0396	2	0	88		3.38133	0.5161	0.4839	0.0449	2	0	66
2.21466	0.1667	0.8333	0.0369	3	0	20		3.20425	0.4729	0.5271	0.044	1	0	62		2.51675	0.5316	0.4684	0.0397	2	0	86		3.40216	0.5081	0.4919	0.0449	1	0	64
2.22508	0.1569	0.8431	0.036	1	0	17		3.21466	0.4496	0.5504	0.0438	3	0	61		2.52716	0.5253	0.4747	0.0397	1	0	84		3.423	0.4919	0.5081	0.0449	2	0	63
2.2355	0.1275	0.8725	0.033	3	0	16		3.22508	0.4419	0.5581	0.0437	1	0	58		2.53758	0.519	0.481	0.0397	1	0	83		3.44383	0.4839	0.5161	0.0449	1	0	61
2.24591	0.1176	0.8824	0.0319	1	0	13		3.27716	0.4341	0.5659	0.0436	1	0	57		2.55841	0.5127	0.4873	0.0398	1	0	82		3.47508	0.4677	0.5323	0.0448	2	0	60
2.25633	0.1078	0.8922	0.0307	1	0	12		3.298	0.4264	0.5736	0.0435	1	0	56		2.56883	0.5063	0.4937	0.0398	1	0	81		3.51675	0.4597	0.5403	0.0448	1	0	58
2.28758	0.098	0.902	0.0294	1	0	11		3.35008	0.4186	0.5814	0.0434	1	0	55		2.57925	0.4937	0.5063	0.0398	2	0	80		3.52716	0.4516	0.5484	0.0447	1	0	57
2.3605	0.0882	0.9118	0.0281	1	0	10		3.3605	0.4109	0.5891	0.0433	1	0	54		2.58966	0.481	0.519	0.0397	2	25	78		3.53758	0.4435	0.5565	0.0446	1	0	56
2.423	0.0784	0.9216	0.0266	1	0	9		3.37091	0.4031	0.5969	0.0432	1	0	53		2.60008	0.4716	0.5284	0.0401	1	0	51		3.55841	0.4355	0.5645	0.0445	1	0	55
2.46466	0.0686	0.9314	0.025	1	0	8		3.38133	0.3953	0.6047	0.043	1	0	52		2.6105	0.4433	0.5567	0.0409	3	0	50		3.58966	0.4274	0.5726	0.0444	1	0	54
2.6105	0.0588	0.9412	0.0233	1	0	7		3.423	0.3876	0.6124	0.0429	1	0	51		2.63133	0.4244	0.5756	0.0412	2	0	47		3.6105	0.4032	0.5968	0.0441	3	0	53
2.63133	0.049	0.951	0.0214	1	0	6		3.43341	0.3798	0.6202	0.0427	1	0	50		2.64175	0.415	0.585	0.0414	1	0	45		3.62091	0.3952	0.6048	0.0439	1	0	50
2.72508	0.0392	0.9608	0.0192	1	0	5		3.45425	0.3643	0.6357	0.0424	2	0	49		2.65216	0.3961	0.6039	0.0416	2	0	44		3.65216	0.3871	0.6129	0.0437	1	0	49
2.798	0.0294	0.9706	0.0167	1	0	4		3.50633	0.3566	0.6434	0.0422	1	0	47		2.673	0.3867	0.6133	0.0417	1	0	42		3.673	0.379	0.621	0.0436	1	0	48
2.8605	0.0196	0.9804	0.0137	1	0	3		3.55841	0.3411	0.6589	0.0417	2	0	46		2.68341	0.3773	0.6227	0.0417	1	0	41		3.68341	0.371	0.629	0.0434	1	0	47
2.96466	0.0098	0.9902	0.0098	1	0	2		3.57925	0.3333	0.6667	0.0415	1	0	44		2.70425	0.3678	0.6322	0.0417	1	0	40		3.70425	0.3629	0.6371	0.0432	1	0	46
3.15216	0	1	0	1	0	1		3.58966	0.3256	0.6744	0.0413	1	0	43		2.71466	0.3395	0.6605	0.0416	3	0	39		3.71466	0.3548	0.6452	0.043	1	0	45
								3.60008	0.3178	0.6822	0.041	1	0	42		2.72508	0.3301	0.6699	0.0415	1	0	36		3.75633	0.3468	0.6532	0.0427	1	0	44
								3.64175	0.3101	0.6899	0.0407	1	0	41		2.75633	0.3018	0.6982	0.041	3	0	35		3.798	0.3306	0.6694	0.0422	2	0	43
								3.65216	0.2946	0.7054	0.0401	2	0	40		2.798	0.2829	0.7171	0.0406	2	0	32		3.80841	0.3145	0.6855	0.0417	2	0	41
								3.69383	0.2868	0.7132	0.0398	1	0	38		2.83966	0.2735	0.7265	0.0403	1	0	30		3.81883	0.3065	0.6935	0.0414	1	0	39
								3.71466	0.2791	0.7209	0.0395	1	0	37		2.85008	0.2641	0.7359	0.04	1	0	29		3.8605	0.2903	0.7097	0.0408	2	0	38
								3.76675	0.2713	0.7287	0.0391	1	0	36		2.8605	0.2452	0.7548	0.0393	2	0	28		3.87091	0.2823	0.7177	0.0404	1	0	36
								3.80841	0.2636	0.7364	0.0388	1	0	35		2.923	0.2169	0.7831	0.038	3	0	26		3.88133	0.2742	0.7258	0.0401	1	0	35
								3.87091	0.2558	0.7442	0.0384	1	0	34		2.93341	0.2075	0.7925	0.0375	1	0	23		3.93341	0.2661	0.7339	0.0397	1	0	34
								3.89175	0.2481	0.7519	0.038	1	0	33		2.96466	0.1981	0.8019	0.037	1	0	22		3.94383	0.2581	0.7419	0.0393	1	0	33
								3.90216	0.2403	0.7597	0.0376	1	0	32		2.9855	0.1886	0.8114	0.0364	1	0	21		4.01675	0.25	0.75	0.0389	1	0	32
								3.97508	0.2326	0.7674	0.0372	1	0	31		2.99591	0.1792	0.8208	0.0358	1	0	20		4.07925	0.2419	0.7581	0.0385	1	0	31
								3.9855	0.2171	0.7829	0.0363	2	0	30		3.00633	0.1698	0.8302	0.0351	1	0	19		4.08966	0.2339	0.7661	0.038	1	0	30
								4.00633	0.2093	0.7907	0.0358	1	0	28		3.01675	0.1603	0.8397	0.0344	1	0	18		4.10008	0.2177	0.7823	0.0371	2	0	29
								4.12091	0.2016	0.7984	0.0353	1	0	27		3.02716	0.1509	0.8491	0.0336	1	0	17		4.1105	0.2097	0.7903	0.0366	1	0	27
								4.13133	0.1938	0.8062	0.0348	1	0	26		3.03758	0.1415	0.8585	0.0328	1	0	16		4.13133	0.2016	0.7984	0.036	1	0	26
								4.14175	0.186	0.814	0.0343	1	0	25		3.06883	0.1226	0.8774	0.0311	2	0	15		4.20425	0.1774	0.8226	0.0343	3	0	25
								4.19383	0.1783	0.8217	0.0337	1	0	24		3.08966	0.1132	0.8868	0.0301	1	0	13		4.24591	0.1613	0.8387	0.033	2	0	22
								4.25633	0.1705	0.8295	0.0331	1	0	23		3.13133	0.0943	0.9057	0.0279	2	0	12		4.30841	0.1532	0.8468	0.0323	1	0	20
								4.26675	0.1628	0.8372	0.0325	1	0	22		3.173	0.0849	0.9151	0.0266	1	0	10		4.31883	0.1452	0.8548	0.0316	1	0	19
								4.30841	0.155	0.845	0.0319	1	0	21		3.20425	0.0755	0.9245	0.0253	1	0	9		4.33966	0.1371	0.8629	0.0309	1	0	18
								4.32925	0.1473	0.8527	0.0312	1	0	20		3.21466	0.066	0.934	0.0238	1	0	8		4.35008	0.129	0.871	0.0301	1	0	17
								4.39175	0.1395	0.8605	0.0305	1	0	19		3.22508	0.0566	0.9434	0.0222	1	0	7		4.38133	0.121	0.879	0.0293	1	0	16
								4.43341	0.124	0.876	0.029	2	0	18		3.25633	0.0472	0.9528	0.0204	1	0	6		4.41258	0.1129	0.8871	0.0284	1	0	15
								4.46466	0.1163	0.8837	0.0282	1	0	16		3.30841	0.0377	0.9623	0.0184	1	0	5		4.548	0.1048	0.8952	0.0275	1	0	14
								4.49591	0.1085	0.8915	0.0274	1	0	15		3.43341	0.0283	0.9717	0.016	1	0	4		4.68341	0.0968	0.9032	0.0266	1	0	13
								4.52716	0.093	0.907	0.0256	2	0	14		3.673	0.0189	0.9811	0.0132	1	0	3		4.82925	0.0887	0.9113	0.0255	1	0	12
								4.69383	0.0775	0.9225	0.0235	2	0	12		3.76675	0.0094	0.9906	0.0094	1	0	2		4.91258	0.0806	0.9194	0.0245	1	0	11
								4.71466	0.0698	0.9302	0.0224	1	0	10		3.93341	0	1	0	1	0	1		4.93341	0.0726	0.9274	0.0233	1	0	10
								4.72508	0.062	0.938	0.0212	1	0	9										4.95425	0.0645	0.9355	0.0221	1	0	9
								4.798	0.0543	0.9457	0.0199	1	0	8										4.99591	0.0565	0.9435	0.0207	1	0	8
								4.93341	0.0465	0.9535	0.0185	1	0	7										5.00633	0.0484	0.9516	0.0193	1	0	7
								4.95425	0.0388	0.9612	0.017	1	0	6										5.07925	0.0403	0.9597	0.0177	1	0	6
								4.9855	0.031	0.969	0.0153	1	0	5										5.16258	0.0323	0.9677	0.0159	1	0	5
								5.18341	0.0233	0.9767	0.0133	1	0	4										5.31883	0.0242	0.9758	0.0138	1	0	4
								5.2355	0.0155	0.9845	0.0109	1	0	3										5.3605	0.0161	0.9839	0.0113	1	0	3
								5.4855	0.0078	0.9922	0.0077	1	0	2										5.45425	0.0081	0.9919	0.008	1	0	2
								5.6105	0	1	0	1	0	1										5.87091	0	1	0	1	0	1
