# Supplementary material for: Neuronal temperature perception induces specific defenses that enable C. elegans to cope with the enhanced reactivity of hydrogen peroxide at high temperature
Source: eLife. 2022 Oct 13;11:e78941. doi: 10.7554/eLife.78941 (PMC9635881; doi:10.7554/eLife.78941)
Supplement: Figure 5—source data 2. [file elife-78941-fig5-data2.xlsx]

## Sheet: Figure 5D
Figure 5D
wild type	wild type
20°C	25°C
0.433258	0.422451
1.28116	0.711741
1.17825	0.628263
1.16349	0.702772
0.788828	0.849773
0.591348	0.851551
0.603385	0.432854
0.692712	0.666047
0.910071	0.975153
1.10516	0.727441
1.41336	0.731838
0.841047	1.18196
1.70409	0.531229
0.430067	0.639253
1.00669	0.909193
0.699717	0.645979
0.672846	0.370607
1.29516	0.495609
0.5464	0.653603
1.09855	0.826669
1.6066	0.273311
1.21696	0.558879
1.27109	0.350461
0.946187	0.196945
1.34047	0.498086
0.368954
1.28987
1.50428

## Sheet: Figure 5E
Figure 5E
wild type	wild type	tax-4(p678)	tax-4(p678)
20°C	25°C	20°C	25°C
1.18893	0.381876	0	0
0.714534	0.63411	0.0756967	0.0431775
1.41956	0.385269	0.104408	0
1.34134	0.579553	0.0666735	0
1.05529	0.522594	0.178213	0
0.968451	0.876429	0.122208	0
1.36769	0.670158	0	0.0758779
0.612152	0.455906	0.00295476	0
0.474101	0.609982	0.0367396	0
0.811672	0.651735	0.155882	0
1.48711	0.917962	0.087558
0.809013	0.737295	0
1.14	0.803562	0.044624
0.610159	0.752621	0.112848
		0
		0.133437
