# Supplementary material for: Neuronal temperature perception induces specific defenses that enable C. elegans to cope with the enhanced reactivity of hydrogen peroxide at high temperature
Source: eLife. 2022 Oct 13;11:e78941. doi: 10.7554/eLife.78941 (PMC9635881; doi:10.7554/eLife.78941)
Supplement: Figure 6—figure supplement 1—source data 1. [file elife-78941-fig6-figsupp1-data1.xlsx]

## Sheet: Figure 6S1C
Figure 6S1C
AFD(-) 20°C								AFD(-); daf-3(mgDf90) 20°C
Age at Death (d)	Survival	Failure	SurvStdErr	Number failed	Number censored	At Risk		Age at Death (d)	Survival	Failure	SurvStdErr	Number failed	Number censored	At Risk
0	1	0	0	0	0	65		0	1	0	0	0	0	66
1.38639	0.9846	0.0154	0.0153	1	0	65		0.54264	0.9848	0.0152	0.015	1	0	66
1.63639	0.9692	0.0308	0.0214	1	0	64		1.39681	0.9697	0.0303	0.0211	1	0	65
1.74056	0.9538	0.0462	0.026	1	0	63		1.56347	0.9545	0.0455	0.0256	1	0	64
2.15722	0.9385	0.0615	0.0298	1	0	62		2.02181	0.9394	0.0606	0.0294	1	0	63
2.23014	0.9231	0.0769	0.0331	1	0	61		2.46972	0.9242	0.0758	0.0326	1	0	62
2.46972	0.9077	0.0923	0.0359	1	0	60		2.94889	0.9091	0.0909	0.0354	1	0	61
2.60514	0.8923	0.1077	0.0384	1	0	59		3.08431	0.8939	0.1061	0.0379	1	0	60
2.77181	0.8769	0.1231	0.0407	1	0	58		3.13639	0.8788	0.1212	0.0402	1	0	59
3.02181	0.8615	0.1385	0.0428	1	0	57		3.17806	0.8636	0.1364	0.0422	1	0	58
3.28222	0.8462	0.1538	0.0448	1	0	56		3.24056	0.8485	0.1515	0.0441	1	0	57
3.69889	0.8308	0.1692	0.0465	1	0	55		3.61556	0.8333	0.1667	0.0459	1	0	56
3.70931	0.8154	0.1846	0.0481	1	0	54		3.65722	0.8182	0.1818	0.0475	1	0	55
3.73014	0.8	0.2	0.0496	1	0	53		3.85514	0.803	0.197	0.049	1	0	54
3.76139	0.7846	0.2154	0.051	1	0	52		3.86556	0.7879	0.2121	0.0503	1	0	53
3.79264	0.7692	0.2308	0.0523	1	0	51		4.02181	0.7727	0.2273	0.0516	1	0	52
3.81347	0.7538	0.2462	0.0534	1	0	50		4.05306	0.7576	0.2424	0.0528	1	0	51
3.84472	0.7385	0.2615	0.0545	1	0	49		4.28222	0.7424	0.2576	0.0538	1	0	50
3.86556	0.7231	0.2769	0.0555	1	0	48		4.43847	0.7273	0.2727	0.0548	1	0	49
3.92806	0.7077	0.2923	0.0564	1	0	47		4.44889	0.6818	0.3182	0.0573	3	0	48
3.98014	0.6923	0.3077	0.0572	1	0	46		4.82389	0.6667	0.3333	0.058	1	0	45
4.04264	0.6769	0.3231	0.058	1	0	45		4.92806	0.6515	0.3485	0.0587	1	0	44
4.14681	0.6615	0.3385	0.0587	1	0	44		4.99056	0.6364	0.3636	0.0592	1	0	43
4.19889	0.6462	0.3538	0.0593	1	0	43		5.01139	0.6212	0.3788	0.0597	1	0	42
4.20931	0.6308	0.3692	0.0599	1	0	42		5.09472	0.6061	0.3939	0.0601	1	0	41
4.39681	0.6154	0.3846	0.0603	1	0	41		5.13639	0.5909	0.4091	0.0605	1	0	40
4.43847	0.6	0.4	0.0608	1	0	40		5.17806	0.5758	0.4242	0.0608	1	0	39
4.55306	0.5846	0.4154	0.0611	1	0	39		5.21972	0.5606	0.4394	0.0611	1	0	38
4.95931	0.5692	0.4308	0.0614	1	0	38		5.28222	0.5455	0.4545	0.0613	1	0	37
4.99056	0.5538	0.4462	0.0617	1	0	37		5.30306	0.5303	0.4697	0.0614	1	0	36
5.02181	0.5385	0.4615	0.0618	1	0	36		5.32389	0.5152	0.4848	0.0615	1	0	35
5.07389	0.5231	0.4769	0.062	1	0	35		5.46972	0.5	0.5	0.0615	1	0	34
5.09472	0.4923	0.5077	0.062	2	0	34		5.61556	0.4848	0.5152	0.0615	1	0	33
5.12597	0.4769	0.5231	0.062	1	0	32		5.65722	0.4697	0.5303	0.0614	1	0	32
5.23014	0.4615	0.5385	0.0618	1	0	31		5.78222	0.4545	0.5455	0.0613	1	0	31
5.29264	0.4462	0.5538	0.0617	1	0	30		5.80306	0.4394	0.5606	0.0611	1	0	30
5.31347	0.4308	0.5692	0.0614	1	0	29		5.99056	0.4242	0.5758	0.0608	1	0	29
5.37597	0.4154	0.5846	0.0611	1	0	28		6.03222	0.4091	0.5909	0.0605	1	0	28
5.54264	0.4	0.6	0.0608	1	0	27		6.07389	0.3939	0.6061	0.0601	1	0	27
5.57389	0.3846	0.6154	0.0603	1	0	26		6.14681	0.3636	0.6364	0.0592	2	0	26
5.64681	0.3692	0.6308	0.0599	1	0	25		6.15722	0.3485	0.6515	0.0587	1	0	24
5.93847	0.3538	0.6462	0.0593	1	0	24		6.17806	0.3333	0.6667	0.058	1	0	23
6.01139	0.3385	0.6615	0.0587	1	0	23		6.25097	0.3182	0.6818	0.0573	1	0	22
6.10514	0.3231	0.6769	0.058	1	0	22		6.29264	0.303	0.697	0.0566	1	0	21
6.21972	0.2923	0.7077	0.0564	2	0	21		6.51139	0.2879	0.7121	0.0557	1	0	20
6.25097	0.2769	0.7231	0.0555	1	0	19		6.56347	0.2727	0.7273	0.0548	1	0	19
6.32389	0.2462	0.7538	0.0534	2	0	18		6.67806	0.2424	0.7576	0.0528	2	0	18
6.50097	0.2308	0.7692	0.0523	1	0	16		6.84472	0.2273	0.7727	0.0516	1	0	16
6.69889	0.2154	0.7846	0.051	1	0	15		7.03222	0.2121	0.7879	0.0503	1	0	15
6.74056	0.2	0.8	0.0496	1	0	14		7.07389	0.197	0.803	0.049	1	0	14
7.20931	0.1692	0.8308	0.0465	2	0	13		7.18847	0.1818	0.8182	0.0475	1	0	13
7.21972	0.1538	0.8462	0.0448	1	0	11		7.20931	0.1667	0.8333	0.0459	1	0	12
7.44889	0.1077	0.8923	0.0384	3	0	10		7.21972	0.1515	0.8485	0.0441	1	0	11
7.75097	0.0923	0.9077	0.0359	1	0	7		7.43847	0.1364	0.8636	0.0422	1	0	10
7.77181	0.0769	0.9231	0.0331	1	0	6		7.60514	0.1212	0.8788	0.0402	1	0	9
7.79264	0.0615	0.9385	0.0298	1	0	5		7.80306	0.1061	0.8939	0.0379	1	0	8
7.88639	0.0462	0.9538	0.026	1	0	4		7.96972	0.0909	0.9091	0.0354	1	0	7
8.14681	0.0308	0.9692	0.0214	1	0	3		8.14681	0.0758	0.9242	0.0326	1	0	6
8.58431	0.0154	0.9846	0.0153	1	0	2		8.20931	0.0606	0.9394	0.0294	1	0	5
8.89681	0	1	0	1	0	1		8.29264	0.0455	0.9545	0.0256	1	0	4
								8.48014	0.0303	0.9697	0.0211	1	0	3
								8.91764	0.0152	0.9848	0.015	1	0	2
								9.12597	0	1	0	1	0	1
