# Supplementary material for: Neuronal temperature perception induces specific defenses that enable C. elegans to cope with the enhanced reactivity of hydrogen peroxide at high temperature
Source: eLife. 2022 Oct 13;11:e78941. doi: 10.7554/eLife.78941 (PMC9635881; doi:10.7554/eLife.78941)
Supplement: Figure 6—source data 1. [file elife-78941-fig6-data1.xlsx]

## Sheet: Figure 6C
Figure 6C
wild type 20°C → 20°C								wild type 25°C → 20°C								daf-16 20°C → 20°C								daf-16 25°C → 20°C
Age at Death (d)	Survival	Failure	SurvStdErr	Number failed	Number censored	At Risk		Age at Death (d)	Survival	Failure	SurvStdErr	Number failed	Number censored	At Risk		Age at Death (d)	Survival	Failure	SurvStdErr	Number failed	Number censored	At Risk		Age at Death (d)	Survival	Failure	SurvStdErr	Number failed	Number censored	At Risk
0	1	0	0	0	0	152		0	1	0	0	0	0	149		0	1	0	0	0	0	87		0	1	0	0	0	0	150
1.06653	0.9934	0.0066	0.0066	1	0	152		0.03528	0.9933	0.0067	0.0067	1	0	149		0.50403	0.9885	0.0115	0.0114	1	0	87		0.03528	0.9933	0.0067	0.0066	1	0	150
1.17069	0.9803	0.0197	0.0113	2	0	151		1.76444	0.9866	0.0134	0.0094	1	0	148		0.84778	0.977	0.023	0.0161	1	0	86		0.06653	0.9933	0.0067	0.0066	0	2	149
1.19153	0.9737	0.0263	0.013	1	0	149		1.83736	0.9799	0.0201	0.0115	1	0	147		0.89986	0.9655	0.0345	0.0196	1	0	85		0.19153	0.9933	0.0067	0.0066	0	1	147
1.25403	0.9671	0.0329	0.0145	1	0	148		1.85819	0.953	0.047	0.0173	4	0	146		0.98319	0.954	0.046	0.0225	1	0	84		0.25403	0.9933	0.0067	0.0066	0	2	146
1.28528	0.9605	0.0395	0.0158	1	0	147		1.86861	0.9463	0.0537	0.0185	1	0	142		1.01444	0.9425	0.0575	0.025	1	0	83		0.96236	0.9864	0.0136	0.0095	1	0	144
1.31653	0.9539	0.0461	0.017	1	0	146		1.94153	0.9396	0.0604	0.0195	1	0	141		1.02486	0.931	0.069	0.0272	1	0	82		0.98319	0.9795	0.0205	0.0117	1	0	143
1.33736	0.9474	0.0526	0.0181	1	0	145		2.00403	0.9329	0.0671	0.0205	1	0	140		1.04569	0.908	0.092	0.031	2	0	81		1.10819	0.9726	0.0274	0.0135	1	0	142
1.34778	0.9408	0.0592	0.0191	1	0	144		2.09778	0.9262	0.0738	0.0214	1	0	139		1.05611	0.8966	0.1034	0.0327	1	0	79		1.14986	0.9657	0.0343	0.0151	1	0	141
1.35819	0.9276	0.0724	0.021	2	0	143		2.11861	0.9195	0.0805	0.0223	1	0	138		1.06653	0.8851	0.1149	0.0342	1	0	78		1.21236	0.9588	0.0412	0.0165	1	0	140
1.37903	0.9211	0.0789	0.0219	1	0	141		2.12903	0.9195	0.0805	0.0223	0	3	137		1.12903	0.8736	0.1264	0.0356	1	0	77		1.26444	0.9519	0.0481	0.0177	1	0	139
1.39986	0.9145	0.0855	0.0227	1	0	140		2.13944	0.9126	0.0874	0.0232	1	0	134		1.23319	0.8391	0.1609	0.0394	3	0	76		1.32694	0.945	0.055	0.0189	1	0	138
1.42069	0.8947	0.1053	0.0249	3	0	139		2.16028	0.9057	0.0943	0.024	1	0	133		1.25403	0.8276	0.1724	0.0405	1	0	73		1.34778	0.9381	0.0619	0.02	1	0	137
1.43111	0.8882	0.1118	0.0256	1	0	136		2.19153	0.8989	0.1011	0.0248	1	0	132		1.26444	0.8161	0.1839	0.0415	1	0	72		1.35819	0.9175	0.0825	0.0228	3	0	136
1.46236	0.875	0.125	0.0268	2	0	135		2.20194	0.892	0.108	0.0255	1	0	131		1.27486	0.8046	0.1954	0.0425	1	0	71		1.39986	0.9106	0.0894	0.0237	1	0	133
1.47278	0.8684	0.1316	0.0274	1	0	133		2.23319	0.8783	0.1217	0.0269	2	0	130		1.29569	0.7816	0.2184	0.0443	2	0	70		1.41028	0.8968	0.1032	0.0252	2	0	132
1.48319	0.8618	0.1382	0.028	1	0	132		2.29569	0.8577	0.1423	0.0288	3	0	128		1.33736	0.7701	0.2299	0.0451	1	0	68		1.43111	0.883	0.117	0.0267	2	0	130
1.49361	0.8487	0.1513	0.0291	2	0	131		2.30611	0.8508	0.1492	0.0293	1	0	125		1.34778	0.7471	0.2529	0.0466	2	0	67		1.44153	0.8761	0.1239	0.0273	1	0	128
1.50403	0.8355	0.1645	0.0301	2	0	129		2.31653	0.8371	0.1629	0.0304	2	0	124		1.35819	0.7126	0.2874	0.0485	3	0	65		1.46236	0.8692	0.1308	0.028	1	0	127
1.52486	0.8224	0.1776	0.031	2	0	127		2.35819	0.8303	0.1697	0.031	1	0	122		1.37903	0.7011	0.2989	0.0491	1	0	62		1.48319	0.8554	0.1446	0.0292	2	0	126
1.53528	0.8092	0.1908	0.0319	2	0	125		2.36861	0.8234	0.1766	0.0314	1	0	121		1.38944	0.6552	0.3448	0.051	4	0	61		1.49361	0.8485	0.1515	0.0298	1	0	124
1.56653	0.7895	0.2105	0.0331	3	0	123		2.37903	0.8234	0.1766	0.0314	0	2	120		1.39986	0.6437	0.3563	0.0513	1	0	57		1.51444	0.8416	0.1584	0.0303	1	0	123
1.57694	0.7763	0.2237	0.0338	2	0	120		2.38944	0.8164	0.1836	0.0319	1	0	118		1.42069	0.6322	0.3678	0.0517	1	0	56		1.54569	0.8347	0.1653	0.0308	1	0	122
1.59778	0.7697	0.2303	0.0341	1	0	118		2.39986	0.8025	0.1975	0.0329	2	0	117		1.47278	0.6092	0.3908	0.0523	2	0	55		1.55611	0.814	0.186	0.0323	3	0	121
1.60819	0.75	0.25	0.0351	3	1	117		2.41028	0.7955	0.2045	0.0333	1	0	115		1.48319	0.5632	0.4368	0.0532	4	0	53		1.56653	0.8071	0.1929	0.0328	1	0	118
1.61861	0.7434	0.2566	0.0354	1	0	113		2.42069	0.7746	0.2254	0.0346	3	0	114		1.50403	0.5517	0.4483	0.0533	1	0	49		1.58736	0.8002	0.1998	0.0332	1	1	117
1.62903	0.7102	0.2898	0.0368	5	0	112		2.44153	0.7606	0.2394	0.0353	2	0	111		1.51444	0.5287	0.4713	0.0535	2	0	48		1.59778	0.7932	0.2068	0.0336	1	0	115
1.63944	0.6903	0.3097	0.0375	3	0	107		2.45194	0.7536	0.2464	0.0357	1	0	109		1.52486	0.5057	0.4943	0.0536	2	3	46		1.60819	0.7654	0.2346	0.0352	4	0	114
1.64986	0.6903	0.3097	0.0375	0	1	104		2.48319	0.7397	0.2603	0.0364	2	0	108		1.54569	0.4811	0.5189	0.0538	2	0	41		1.62903	0.7584	0.2416	0.0356	1	0	110
1.67069	0.6769	0.3231	0.038	2	0	103		2.50403	0.7327	0.2673	0.0367	1	0	106		1.56653	0.4564	0.5436	0.0538	2	0	39		1.63944	0.7515	0.2485	0.0359	1	0	109
1.69153	0.6635	0.3365	0.0384	2	0	101		2.51444	0.7257	0.2743	0.037	1	0	105		1.58736	0.4317	0.5683	0.0536	2	0	37		1.64986	0.7445	0.2555	0.0363	1	0	108
1.70194	0.6434	0.3566	0.039	3	0	99		2.53528	0.7187	0.2813	0.0373	1	0	104		1.59778	0.3947	0.6053	0.0531	3	0	35		1.66028	0.7376	0.2624	0.0366	1	0	107
1.71236	0.6367	0.3633	0.0391	1	0	96		2.58736	0.7118	0.2882	0.0376	1	0	103		1.63944	0.3701	0.6299	0.0526	2	0	32		1.68111	0.7306	0.2694	0.0369	1	0	106
1.73319	0.6098	0.3902	0.0397	4	0	95		2.60819	0.6978	0.3022	0.0381	2	0	102		1.64986	0.3577	0.6423	0.0522	1	0	30		1.70194	0.7097	0.2903	0.0378	3	3	105
1.74361	0.5964	0.4036	0.0399	2	0	91		2.61861	0.6908	0.3092	0.0384	1	0	100		1.67069	0.2837	0.7163	0.0494	6	0	29		1.73319	0.6882	0.3118	0.0386	3	1	99
1.75403	0.5696	0.4304	0.0403	4	0	89		2.63944	0.6699	0.3301	0.0391	3	0	99		1.69153	0.2467	0.7533	0.0474	3	0	23		1.74361	0.6737	0.3263	0.0391	2	0	95
1.76444	0.5562	0.4438	0.0405	2	0	85		2.64986	0.642	0.358	0.0399	4	0	96		1.75403	0.2344	0.7656	0.0466	1	0	20		1.75403	0.652	0.348	0.0398	3	0	93
1.77486	0.5428	0.4572	0.0406	2	0	83		2.66028	0.621	0.379	0.0403	3	0	92		1.76444	0.222	0.778	0.0457	1	0	19		1.76444	0.6375	0.3625	0.0402	2	0	90
1.78528	0.5294	0.4706	0.0407	2	0	81		2.67069	0.6141	0.3859	0.0405	1	0	89		1.77486	0.2097	0.7903	0.0448	1	0	18		1.77486	0.6303	0.3697	0.0404	1	0	88
1.79569	0.5227	0.4773	0.0407	1	0	79		2.68111	0.6071	0.3929	0.0406	1	0	88		1.80611	0.1974	0.8026	0.0438	1	0	17		1.80611	0.6085	0.3915	0.0409	3	0	87
1.80611	0.5093	0.4907	0.0408	2	0	78		2.69153	0.5931	0.4069	0.0409	2	0	87		1.81653	0.185	0.815	0.0428	1	0	16		1.81653	0.594	0.406	0.0412	2	0	84
1.81653	0.4825	0.5175	0.0408	4	0	76		2.71236	0.5652	0.4348	0.0413	4	0	85		1.83736	0.1727	0.8273	0.0417	1	0	15		1.82694	0.5796	0.4204	0.0415	2	0	82
1.82694	0.4758	0.5242	0.0407	1	0	72		2.72278	0.5582	0.4418	0.0413	1	0	81		1.84778	0.1604	0.8396	0.0405	1	0	14		1.85819	0.5723	0.4277	0.0416	1	0	80
1.83736	0.4691	0.5309	0.0407	1	0	71		2.74361	0.5513	0.4487	0.0414	1	0	80		1.85819	0.148	0.852	0.0392	1	0	13		1.86861	0.5723	0.4277	0.0416	0	1	79
1.85819	0.4557	0.5443	0.0406	2	0	70		2.77486	0.5443	0.4557	0.0415	1	0	79		1.89986	0.0987	0.9013	0.033	4	0	12		1.87903	0.5503	0.4497	0.0419	3	0	78
1.86861	0.4423	0.5577	0.0405	2	0	68		2.80611	0.5373	0.4627	0.0415	1	0	78		1.92069	0.0863	0.9137	0.0311	1	0	8		1.89986	0.543	0.457	0.042	1	0	75
1.87903	0.4356	0.5644	0.0405	1	0	66		2.83736	0.5373	0.4627	0.0415	0	1	77		2.00403	0.074	0.926	0.029	1	0	7		1.91028	0.5356	0.4644	0.042	1	0	74
1.89986	0.4222	0.5778	0.0403	2	0	65		2.84778	0.5232	0.4768	0.0416	2	0	76		2.06653	0.0617	0.9383	0.0267	1	0	6		1.92069	0.5283	0.4717	0.0421	1	0	73
1.93111	0.382	0.618	0.0397	6	0	63		2.86861	0.5161	0.4839	0.0416	1	0	74		2.09778	0.0493	0.9507	0.024	1	0	5		1.93111	0.5136	0.4864	0.0422	2	0	72
1.94153	0.3753	0.6247	0.0396	1	0	57		2.88944	0.509	0.491	0.0417	1	0	73		2.14986	0.037	0.963	0.0209	1	0	4		1.94153	0.5063	0.4937	0.0422	1	0	70
1.97278	0.3619	0.6381	0.0393	2	0	56		2.89986	0.502	0.498	0.0417	1	0	72		2.18111	0.0123	0.9877	0.0123	2	0	3		1.95194	0.4989	0.5011	0.0422	1	0	69
2.00403	0.3552	0.6448	0.0391	1	0	54		2.95194	0.4949	0.5051	0.0417	1	0	71		2.35819	0	1	0	1	0	1		1.97278	0.4916	0.5084	0.0422	1	0	68
2.01444	0.3485	0.6515	0.0389	1	0	53		2.97278	0.4878	0.5122	0.0417	1	0	70										1.99361	0.4916	0.5084	0.0422	0	1	67
2.03528	0.3418	0.6582	0.0388	1	0	52		3.00403	0.4807	0.5193	0.0417	1	0	69										2.00403	0.4842	0.5158	0.0422	1	0	66
2.05611	0.3351	0.6649	0.0386	1	0	51		3.01444	0.4666	0.5334	0.0416	2	0	68										2.02486	0.4767	0.5233	0.0422	1	0	65
2.06653	0.3284	0.6716	0.0384	1	0	50		3.04569	0.4454	0.5546	0.0415	3	0	66										2.03528	0.432	0.568	0.042	6	0	64
2.07694	0.3217	0.6783	0.0382	1	0	49		3.07694	0.4383	0.5617	0.0414	1	0	63										2.04569	0.3948	0.6052	0.0416	5	0	58
2.08736	0.315	0.685	0.038	1	0	48		3.08736	0.4171	0.5829	0.0412	3	0	62										2.06653	0.3799	0.6201	0.0413	2	1	53
2.10819	0.3083	0.6917	0.0377	1	0	47		3.09778	0.403	0.597	0.041	2	0	59										2.07694	0.3723	0.6277	0.0412	1	0	50
2.11861	0.3016	0.6984	0.0375	1	0	46		3.10819	0.3959	0.6041	0.0409	1	0	57										2.08736	0.3647	0.6353	0.0411	1	0	49
2.12903	0.2949	0.7051	0.0373	1	0	45		3.12903	0.3888	0.6112	0.0408	1	0	56										2.09778	0.3495	0.6505	0.0407	2	0	48
2.13944	0.2882	0.7118	0.037	1	0	44		3.13944	0.3818	0.6182	0.0406	1	0	55										2.13944	0.3343	0.6657	0.0403	2	0	46
2.16028	0.2815	0.7185	0.0368	1	0	43		3.14986	0.3747	0.6253	0.0405	1	0	54										2.14986	0.3115	0.6885	0.0397	3	0	44
2.17069	0.2748	0.7252	0.0365	1	0	42		3.18111	0.3606	0.6394	0.0402	2	0	53										2.17069	0.3039	0.6961	0.0394	1	0	41
2.18111	0.2681	0.7319	0.0362	1	0	41		3.20194	0.3535	0.6465	0.04	1	0	51										2.18111	0.2887	0.7113	0.0389	2	0	40
2.20194	0.2547	0.7453	0.0356	2	0	40		3.21236	0.3464	0.6536	0.0398	1	0	50										2.20194	0.2811	0.7189	0.0386	1	0	38
2.21236	0.248	0.752	0.0353	1	0	38		3.23319	0.3323	0.6677	0.0394	2	0	49										2.21236	0.2735	0.7265	0.0383	1	0	37
2.22278	0.2346	0.7654	0.0346	2	0	37		3.35819	0.3252	0.6748	0.0392	1	0	47										2.22278	0.2659	0.7341	0.038	1	1	36
2.23319	0.2279	0.7721	0.0343	1	0	35		3.36861	0.3181	0.6819	0.039	1	0	46										2.27486	0.2581	0.7419	0.0377	1	0	34
2.24361	0.2212	0.7788	0.0339	1	0	34		3.41028	0.3111	0.6889	0.0388	1	0	45										2.29569	0.2503	0.7497	0.0373	1	0	33
2.26444	0.2077	0.7923	0.0332	2	0	33		3.44153	0.304	0.696	0.0385	1	0	44										2.30611	0.2424	0.7576	0.037	1	0	32
2.29569	0.201	0.799	0.0328	1	0	31		3.45194	0.304	0.696	0.0385	0	1	43										2.31653	0.2346	0.7654	0.0366	1	0	31
2.31653	0.1943	0.8057	0.0324	1	0	30		3.46236	0.2968	0.7032	0.0383	1	0	42										2.32694	0.2268	0.7732	0.0362	1	0	30
2.38944	0.1876	0.8124	0.0319	1	0	29		3.48319	0.2895	0.7105	0.038	1	0	41										2.33736	0.2112	0.7888	0.0354	2	0	29
2.42069	0.1809	0.8191	0.0315	1	0	28		3.49361	0.2823	0.7177	0.0378	1	1	40										2.38944	0.2033	0.7967	0.0349	1	0	27
2.43111	0.1742	0.8258	0.031	1	0	27		3.50403	0.2749	0.7251	0.0375	1	0	38										2.41028	0.1877	0.8123	0.0339	2	0	26
2.50403	0.1675	0.8325	0.0306	1	0	26		3.52486	0.2674	0.7326	0.0372	1	0	37										2.43111	0.1721	0.8279	0.0329	2	0	24
2.51444	0.1608	0.8392	0.0301	1	0	25		3.53528	0.2451	0.7549	0.0363	3	0	36										2.44153	0.1564	0.8436	0.0317	2	0	22
2.52486	0.1541	0.8459	0.0295	1	0	24		3.57694	0.2377	0.7623	0.0359	1	0	33										2.45194	0.1486	0.8514	0.031	1	0	20
2.54569	0.1474	0.8526	0.029	1	0	23		3.58736	0.2377	0.7623	0.0359	0	1	32										2.46236	0.1408	0.8592	0.0304	1	0	19
2.55611	0.1407	0.8593	0.0285	1	0	22		3.71236	0.2224	0.7776	0.0352	2	0	31										2.51444	0.133	0.867	0.0297	1	0	18
2.56653	0.134	0.866	0.0279	1	0	21		3.73319	0.2147	0.7853	0.0348	1	0	29										2.52486	0.1251	0.8749	0.0289	1	0	17
2.57694	0.1273	0.8727	0.0273	1	0	20		3.74361	0.207	0.793	0.0344	1	0	28										2.54569	0.1173	0.8827	0.0282	1	0	16
2.59778	0.1206	0.8794	0.0266	1	0	19		3.75403	0.1994	0.8006	0.034	1	0	27										2.57694	0.1017	0.8983	0.0265	2	0	15
2.60819	0.1139	0.8861	0.026	1	0	18		3.80611	0.1917	0.8083	0.0335	1	0	26										2.58736	0.0939	0.9061	0.0256	1	0	13
2.62903	0.1072	0.8928	0.0253	1	0	17		3.84778	0.184	0.816	0.033	1	0	25										2.61861	0.086	0.914	0.0246	1	0	12
2.63944	0.1005	0.8995	0.0246	1	0	16		3.86861	0.1764	0.8236	0.0325	1	0	24										2.62903	0.0782	0.9218	0.0236	1	0	11
2.64986	0.0938	0.9062	0.0239	1	0	15		3.87903	0.1687	0.8313	0.032	1	0	23										2.67069	0.0704	0.9296	0.0225	1	0	10
2.66028	0.0871	0.9129	0.0231	1	0	14		3.88944	0.161	0.839	0.0315	1	0	22										2.71236	0.0626	0.9374	0.0213	1	0	9
2.72278	0.0804	0.9196	0.0223	1	0	13		3.93111	0.1534	0.8466	0.0309	1	0	21										2.78528	0.0547	0.9453	0.02	1	0	8
2.74361	0.0737	0.9263	0.0214	1	0	12		3.95194	0.1457	0.8543	0.0303	1	0	20										2.82694	0.0469	0.9531	0.0186	1	0	7
2.79569	0.067	0.933	0.0205	1	0	11		4.03528	0.1304	0.8696	0.029	2	0	19										2.84778	0.0313	0.9687	0.0154	2	0	6
2.80611	0.0536	0.9464	0.0184	2	0	10		4.07694	0.1227	0.8773	0.0283	1	0	17										2.86861	0.0235	0.9765	0.0134	1	0	4
2.82694	0.0402	0.9598	0.0161	2	0	8		4.09778	0.115	0.885	0.0275	1	0	16										2.87903	0.0156	0.9844	0.011	1	0	3
2.84778	0.0335	0.9665	0.0147	1	0	6		4.18111	0.1074	0.8926	0.0267	1	0	15										2.97278	0.0078	0.9922	0.0078	1	0	2
2.86861	0.0268	0.9732	0.0132	1	0	5		4.20194	0.0997	0.9003	0.0259	1	0	14										3.08736	0	1	0	1	0	1
2.89986	0.0201	0.9799	0.0115	1	0	4		4.21236	0.092	0.908	0.025	1	0	13
2.97278	0.0134	0.9866	0.0094	1	0	3		4.24361	0.0844	0.9156	0.0241	1	0	12
3.02486	0.0067	0.9933	0.0067	1	0	2		4.28528	0.0767	0.9233	0.0231	1	0	11
3.36861	0	1	0	1	0	1		4.30611	0.069	0.931	0.022	1	0	10
								4.39986	0.0613	0.9387	0.0209	1	0	9
								4.43111	0.0537	0.9463	0.0196	1	0	8
								4.45194	0.046	0.954	0.0182	1	0	7
								4.47278	0.0307	0.9693	0.015	2	0	6
								4.56653	0.023	0.977	0.0131	1	0	4
								4.64986	0.0153	0.9847	0.0107	1	0	3
								4.76444	0.0077	0.9923	0.0076	1	0	2
								5.00403	0	1	0	1	0	1

## Sheet: Figure 6D
Figure 6D
wild type 20°C								AFD(-) 20°C								daf-16 (mu86) 20°C								AFD(-); daf-16 (mu86) 20°C
Age at Death (d)	Survival	Failure	SurvStdErr	Number failed	Number censored	At Risk		Age at Death (d)	Survival	Failure	SurvStdErr	Number failed	Number censored	At Risk		Age at Death (d)	Survival	Failure	SurvStdErr	Number failed	Number censored	At Risk		Age at Death (d)	Survival	Failure	SurvStdErr	Number failed	Number censored	At Risk
0	1	0	0	0	0	110		0	1	0	0	0	0	138		0	1	0	0	0	0	192		0	1	0	0	0	0	68
1.16293	0.9909	0.0091	0.009	1	0	110		0.22543	0.9928	0.0072	0.0072	1	0	138		0.07959	0.9948	0.0052	0.0052	1	0	192		0.07959	0.9853	0.0147	0.0146	1	0	68
1.18376	0.9818	0.0182	0.0127	1	0	109		2.76709	0.9855	0.0145	0.0102	1	0	137		0.71501	0.9896	0.0104	0.0073	1	0	191		0.09001	0.9706	0.0294	0.0205	1	0	67
1.29834	0.9727	0.0273	0.0155	1	0	108		3.46501	0.971	0.029	0.0143	2	0	136		0.80876	0.9844	0.0156	0.009	1	0	190		0.65251	0.9559	0.0441	0.0249	1	0	66
1.34001	0.9636	0.0364	0.0178	1	0	107		3.50668	0.9638	0.0362	0.0159	1	0	134		0.88168	0.974	0.026	0.0115	2	0	189		1.36084	0.9265	0.0735	0.0317	2	0	65
1.38168	0.9545	0.0455	0.0199	1	0	106		3.60043	0.9565	0.0435	0.0174	1	0	133		0.93376	0.9688	0.0312	0.0126	1	0	187		1.47543	0.9118	0.0882	0.0344	1	0	63
1.47543	0.9455	0.0545	0.0217	1	0	105		3.69418	0.9493	0.0507	0.0187	1	0	132		0.94418	0.9635	0.0365	0.0135	1	0	186		1.61084	0.8971	0.1029	0.0369	1	0	62
1.53793	0.9364	0.0636	0.0233	1	0	104		3.73584	0.942	0.058	0.0199	1	0	131		1.00668	0.9583	0.0417	0.0144	1	0	185		1.62126	0.8824	0.1176	0.0391	1	0	61
1.59001	0.9273	0.0727	0.0248	1	0	103		3.75668	0.9348	0.0652	0.021	1	0	130		1.06918	0.9531	0.0469	0.0153	1	0	184		1.63168	0.8676	0.1324	0.0411	1	0	60
1.60043	0.9	0.1	0.0286	3	0	102		3.86084	0.9275	0.0725	0.0221	1	0	129		1.07959	0.9479	0.0521	0.016	1	0	183		1.64209	0.8382	0.1618	0.0447	2	0	59
1.62126	0.8909	0.1091	0.0297	1	0	99		3.88168	0.9203	0.0797	0.0231	1	0	128		1.10043	0.9427	0.0573	0.0168	1	0	182		1.66293	0.8235	0.1765	0.0462	1	0	57
1.65251	0.8818	0.1182	0.0308	1	0	98		3.96501	0.913	0.087	0.024	1	0	127		1.11084	0.9375	0.0625	0.0175	1	0	181		1.71501	0.8088	0.1912	0.0477	1	0	56
1.69418	0.8636	0.1364	0.0327	2	0	97		3.98584	0.9058	0.0942	0.0249	1	0	126		1.14209	0.9271	0.0729	0.0188	2	0	180		1.72543	0.7941	0.2059	0.049	1	0	55
1.72543	0.8455	0.1545	0.0345	2	0	95		4.04834	0.8986	0.1014	0.0257	1	0	125		1.16293	0.9219	0.0781	0.0194	1	0	178		1.75668	0.7794	0.2206	0.0503	1	0	54
1.73584	0.8364	0.1636	0.0353	1	0	93		4.05876	0.8841	0.1159	0.0273	2	0	124		1.17334	0.9167	0.0833	0.0199	1	0	177		1.79834	0.75	0.25	0.0525	2	0	53
1.75668	0.8182	0.1818	0.0368	2	0	92		4.06918	0.8768	0.1232	0.028	1	0	122		1.22543	0.9063	0.0937	0.021	2	0	176		1.87126	0.7353	0.2647	0.0535	1	0	51
1.80876	0.8	0.2	0.0381	2	0	90		4.07959	0.8623	0.1377	0.0293	2	0	121		1.23584	0.8958	0.1042	0.022	2	0	174		1.88168	0.7206	0.2794	0.0544	1	0	50
1.81918	0.7909	0.2091	0.0388	1	0	88		4.15251	0.8551	0.1449	0.03	1	0	119		1.24626	0.8854	0.1146	0.023	2	0	172		1.89209	0.7059	0.2941	0.0553	1	0	49
1.84001	0.7818	0.2182	0.0394	1	0	87		4.17334	0.8478	0.1522	0.0306	1	0	118		1.25668	0.875	0.125	0.0239	2	0	170		1.95459	0.6912	0.3088	0.056	1	0	48
1.85043	0.7636	0.2364	0.0405	2	0	86		4.25668	0.8406	0.1594	0.0312	1	0	117		1.27751	0.8698	0.1302	0.0243	1	0	168		1.97543	0.6765	0.3235	0.0567	1	0	47
1.86084	0.7364	0.2636	0.042	3	0	84		4.29834	0.8333	0.1667	0.0317	1	0	116		1.29834	0.8646	0.1354	0.0247	1	0	167		2.00668	0.6618	0.3382	0.0574	1	0	46
1.87126	0.7273	0.2727	0.0425	1	0	81		4.34001	0.8261	0.1739	0.0323	1	0	115		1.30876	0.8542	0.1458	0.0255	2	0	166		2.05876	0.6471	0.3529	0.058	1	0	45
1.88168	0.7	0.3	0.0437	3	0	80		4.36084	0.8188	0.1812	0.0328	1	0	114		1.31918	0.8333	0.1667	0.0269	4	0	164		2.10043	0.6324	0.3676	0.0585	1	0	44
1.90251	0.6636	0.3364	0.045	4	0	77		4.38168	0.8043	0.1957	0.0338	2	0	113		1.32959	0.8281	0.1719	0.0272	1	0	160		2.11084	0.6176	0.3824	0.0589	1	0	43
1.92334	0.6364	0.3636	0.0459	3	0	73		4.40251	0.7971	0.2029	0.0342	1	0	111		1.37126	0.8125	0.1875	0.0282	3	0	159		2.16293	0.6029	0.3971	0.0593	1	0	42
1.93376	0.6273	0.3727	0.0461	1	0	70		4.44418	0.7899	0.2101	0.0347	1	0	110		1.38168	0.8073	0.1927	0.0285	1	0	156		2.26709	0.5882	0.4118	0.0597	1	0	41
1.94418	0.5909	0.4091	0.0469	4	0	69		4.46501	0.7826	0.2174	0.0351	1	0	109		1.39209	0.7865	0.2135	0.0296	4	0	155		2.27751	0.5735	0.4265	0.06	1	0	40
1.96501	0.5545	0.4455	0.0474	4	0	65		4.50668	0.7681	0.2319	0.0359	2	0	108		1.40251	0.7813	0.2187	0.0298	1	0	151		2.29834	0.5588	0.4412	0.0602	1	0	39
2.00668	0.5455	0.4545	0.0475	1	0	61		4.51709	0.7609	0.2391	0.0363	1	0	106		1.41293	0.776	0.224	0.0301	1	0	150		2.30876	0.5147	0.4853	0.0606	3	0	38
2.03793	0.5091	0.4909	0.0477	4	0	60		4.52751	0.7464	0.2536	0.037	2	11	105		1.42334	0.7552	0.2448	0.031	4	0	149		2.31918	0.5	0.5	0.0606	1	0	35
2.06918	0.5	0.5	0.0477	1	0	56		4.56918	0.7383	0.2617	0.0375	1	0	92		1.43376	0.75	0.25	0.0313	1	0	145		2.36084	0.4706	0.5294	0.0605	2	0	34
2.09001	0.4818	0.5182	0.0476	2	0	55		4.57959	0.7302	0.2698	0.038	1	0	91		1.44418	0.7396	0.2604	0.0317	2	0	144		2.37126	0.4265	0.5735	0.06	3	0	32
2.10043	0.4727	0.5273	0.0476	1	0	53		4.65251	0.722	0.278	0.0384	1	0	90		1.45459	0.7292	0.2708	0.0321	2	0	142		2.41293	0.4118	0.5882	0.0597	1	0	29
2.13168	0.4545	0.5455	0.0475	2	0	52		4.68376	0.6977	0.3023	0.0396	3	0	89		1.47543	0.724	0.276	0.0323	1	0	140		2.42334	0.3824	0.6176	0.0589	2	0	28
2.14209	0.4455	0.5545	0.0474	1	0	50		4.69418	0.6896	0.3104	0.04	1	0	86		1.48584	0.7135	0.2865	0.0326	2	0	139		2.43376	0.3529	0.6471	0.058	2	0	26
2.15251	0.4364	0.5636	0.0473	1	0	49		4.75668	0.6815	0.3185	0.0403	1	0	85		1.49626	0.6979	0.3021	0.0331	3	0	137		2.48584	0.3382	0.6618	0.0574	1	0	24
2.17334	0.4273	0.5727	0.0472	1	0	48		4.76709	0.6734	0.3266	0.0406	1	0	84		1.50668	0.6927	0.3073	0.0333	1	0	134		2.49626	0.3235	0.6765	0.0567	1	0	23
2.19418	0.4182	0.5818	0.047	1	0	47		4.84001	0.6652	0.3348	0.0409	1	0	83		1.51709	0.6771	0.3229	0.0337	3	0	133		2.54834	0.2941	0.7059	0.0553	2	0	22
2.20459	0.4	0.6	0.0467	2	0	46		4.88168	0.6571	0.3429	0.0412	1	0	82		1.52751	0.6615	0.3385	0.0342	3	0	130		2.61084	0.2794	0.7206	0.0544	1	0	20
2.23584	0.3818	0.6182	0.0463	2	0	44		4.89209	0.649	0.351	0.0415	1	0	81		1.53793	0.6563	0.3437	0.0343	1	0	127		2.63168	0.2647	0.7353	0.0535	1	0	19
2.26709	0.3636	0.6364	0.0459	2	0	42		4.96501	0.6409	0.3591	0.0418	1	0	80		1.55876	0.6563	0.3437	0.0343	0	16	126		2.73584	0.25	0.75	0.0525	1	0	18
2.27751	0.3545	0.6455	0.0456	1	0	40		5.06918	0.6328	0.3672	0.042	1	0	79		1.59001	0.6503	0.3497	0.0345	1	0	110		2.75668	0.2206	0.7794	0.0503	2	0	17
2.29834	0.3455	0.6545	0.0453	1	0	39		5.09001	0.6247	0.3753	0.0423	1	0	78		1.60043	0.6264	0.3736	0.0352	4	0	109		2.78793	0.2059	0.7941	0.049	1	0	15
2.30876	0.3364	0.6636	0.045	1	0	38		5.13168	0.6166	0.3834	0.0425	1	0	77		1.61084	0.6205	0.3795	0.0354	1	0	105		2.80876	0.1912	0.8088	0.0477	1	0	14
2.31918	0.3182	0.6818	0.0444	2	0	37		5.21501	0.6085	0.3915	0.0427	1	0	76		1.64209	0.6026	0.3974	0.0358	3	0	104		2.99626	0.1618	0.8382	0.0447	2	0	13
2.34001	0.2909	0.7091	0.0433	3	0	35		5.22543	0.6003	0.3997	0.0429	1	0	75		1.66293	0.5847	0.4153	0.0362	3	0	101		3.00668	0.1471	0.8529	0.0429	1	0	11
2.36084	0.2818	0.7182	0.0429	1	0	32		5.25668	0.5841	0.4159	0.0432	2	0	74		1.67334	0.5787	0.4213	0.0364	1	0	98		3.09001	0.1324	0.8676	0.0411	1	0	10
2.39209	0.2727	0.7273	0.0425	1	0	31		5.27751	0.576	0.424	0.0434	1	0	72		1.69418	0.5727	0.4273	0.0365	1	0	97		3.23584	0.1176	0.8824	0.0391	1	0	9
2.40251	0.2636	0.7364	0.042	1	0	30		5.29834	0.5679	0.4321	0.0435	1	0	71		1.70459	0.5608	0.4392	0.0367	2	0	96		3.26709	0.1029	0.8971	0.0369	1	0	8
2.42334	0.2364	0.7636	0.0405	3	0	29		5.34001	0.5517	0.4483	0.0438	2	0	70		1.71501	0.5429	0.4571	0.0369	3	0	94		3.28793	0.0882	0.9118	0.0344	1	0	7
2.43376	0.2182	0.7818	0.0394	2	0	26		5.35043	0.5436	0.4564	0.0439	1	0	68		1.72543	0.531	0.469	0.0371	2	0	91		3.36084	0.0735	0.9265	0.0317	1	0	6
2.46501	0.2091	0.7909	0.0388	1	0	24		5.36084	0.5354	0.4646	0.044	1	0	67		1.73584	0.519	0.481	0.0372	2	0	89		3.37126	0.0588	0.9412	0.0285	1	0	5
2.48584	0.2	0.8	0.0381	1	0	23		5.39209	0.5273	0.4727	0.044	1	0	66		1.74626	0.4952	0.5048	0.0373	4	0	87		3.41293	0.0441	0.9559	0.0249	1	0	4
2.50668	0.1909	0.8091	0.0375	1	0	22		5.42334	0.5192	0.4808	0.0441	1	0	65		1.75668	0.4713	0.5287	0.0374	4	0	83		3.54834	0.0294	0.9706	0.0205	1	0	3
2.51709	0.1727	0.8273	0.036	2	0	21		5.44418	0.5111	0.4889	0.0442	1	0	64		1.76709	0.4653	0.5347	0.0374	1	0	79		3.85043	0	1	0	2	0	2
2.52751	0.1636	0.8364	0.0353	1	0	19		5.47543	0.503	0.497	0.0442	1	0	63		1.77751	0.4594	0.5406	0.0374	1	0	78
2.55876	0.1545	0.8455	0.0345	1	0	18		5.50668	0.4949	0.5051	0.0442	1	0	62		1.78793	0.4474	0.5526	0.0374	2	0	77
2.59001	0.1455	0.8545	0.0336	1	0	17		5.52751	0.4787	0.5213	0.0442	2	0	61		1.79834	0.4295	0.5705	0.0373	3	0	75
2.60043	0.1364	0.8636	0.0327	1	0	16		5.54834	0.4705	0.5295	0.0442	1	0	59		1.80876	0.4236	0.5764	0.0372	1	0	72
2.61084	0.1273	0.8727	0.0318	1	0	15		5.55876	0.4624	0.5376	0.0442	1	0	58		1.81918	0.4057	0.5943	0.0371	3	0	71
2.63168	0.1091	0.8909	0.0297	2	0	14		5.60043	0.4543	0.5457	0.0442	1	0	57		1.84001	0.3997	0.6003	0.037	1	0	68
2.65251	0.1	0.9	0.0286	1	0	12		5.63168	0.4462	0.5538	0.0441	1	0	56		1.85043	0.3878	0.6122	0.0368	2	0	67
2.66293	0.0909	0.9091	0.0274	1	0	11		5.65251	0.4381	0.5619	0.0441	1	0	55		1.86084	0.3699	0.6301	0.0366	3	0	65
2.73584	0.0818	0.9182	0.0261	1	0	10		5.69418	0.43	0.57	0.044	1	0	54		1.87126	0.358	0.642	0.0363	2	0	62
2.80876	0.0636	0.9364	0.0233	2	0	9		5.72543	0.4219	0.5781	0.0439	1	0	53		1.91293	0.3401	0.6599	0.036	3	20	60
2.81918	0.0545	0.9455	0.0217	1	0	7		5.92334	0.4056	0.5944	0.0437	2	0	52		1.92334	0.3309	0.6691	0.0361	1	0	37
2.88168	0.0455	0.9545	0.0199	1	0	6		5.94418	0.3975	0.6025	0.0435	1	0	50		1.94418	0.3125	0.6875	0.0364	2	0	36
2.92334	0.0364	0.9636	0.0178	1	0	5		5.97543	0.3894	0.6106	0.0434	1	0	49		1.97543	0.2941	0.7059	0.0365	2	0	34
3.10043	0.0273	0.9727	0.0155	1	0	4		5.98584	0.3813	0.6187	0.0433	1	0	48		1.99626	0.2849	0.7151	0.0365	1	0	32
3.11084	0.0182	0.9818	0.0127	1	0	3		5.99626	0.3732	0.6268	0.0431	1	0	47		2.00668	0.2665	0.7335	0.0364	2	0	31
3.17334	0.0091	0.9909	0.009	1	0	2		6.01709	0.3651	0.6349	0.0429	1	0	46		2.01709	0.2573	0.7427	0.0363	1	0	29
4.44418	0	1	0	1	0	1		6.05876	0.3489	0.6511	0.0425	2	0	45		2.02751	0.2481	0.7519	0.0361	1	0	28
								6.06918	0.3407	0.6593	0.0423	1	0	43		2.04834	0.239	0.761	0.0359	1	0	27
								6.09001	0.3245	0.6755	0.0418	2	0	42		2.05876	0.2298	0.7702	0.0357	1	0	26
								6.15251	0.3164	0.6836	0.0415	1	0	40		2.07959	0.2022	0.7978	0.0348	3	0	25
								6.18376	0.3083	0.6917	0.0413	1	0	39		2.10043	0.193	0.807	0.0344	1	0	22
								6.19418	0.2921	0.7079	0.0406	2	0	38		2.15251	0.1746	0.8254	0.0335	2	0	21
								6.31918	0.2839	0.7161	0.0403	1	0	36		2.16293	0.1562	0.8438	0.0324	2	0	19
								6.39209	0.2758	0.7242	0.04	1	0	35		2.17334	0.1471	0.8529	0.0318	1	0	17
								6.40251	0.2677	0.7323	0.0396	1	0	34		2.19418	0.1195	0.8805	0.0295	3	0	16
								6.44418	0.2596	0.7404	0.0392	1	0	33		2.24626	0.1103	0.8897	0.0287	1	0	13
								6.48584	0.2515	0.7485	0.0388	1	0	32		2.26709	0.1011	0.8989	0.0277	1	0	12
								6.50668	0.2353	0.7647	0.038	2	0	31		2.34001	0.0919	0.9081	0.0267	1	0	11
								6.51709	0.2272	0.7728	0.0375	1	0	29		2.35043	0.0827	0.9173	0.0255	1	0	10
								6.52751	0.219	0.781	0.0371	1	0	28		2.41293	0.0735	0.9265	0.0243	1	0	9
								6.54834	0.2109	0.7891	0.0366	1	0	27		2.43376	0.0643	0.9357	0.0229	1	0	8
								6.59001	0.2028	0.7972	0.036	1	0	26		2.46501	0.0551	0.9449	0.0214	1	0	7
								6.61084	0.1947	0.8053	0.0355	1	0	25		2.47543	0.046	0.954	0.0197	1	0	6
								6.63168	0.1866	0.8134	0.0349	1	0	24		2.52751	0.0368	0.9632	0.0178	1	0	5
								6.68376	0.1785	0.8215	0.0344	1	0	23		2.59001	0.0184	0.9816	0.0128	2	0	4
								6.72543	0.1704	0.8296	0.0337	1	0	22		2.96501	0.0092	0.9908	0.0091	1	0	2
								6.79834	0.1623	0.8377	0.0331	1	0	21		3.39209	0	1	0	1	0	1
								6.85043	0.146	0.854	0.0317	2	0	20
								6.97543	0.1298	0.8702	0.0302	2	0	18
								7.00668	0.1136	0.8864	0.0285	2	0	16
								7.01709	0.1055	0.8945	0.0276	1	0	14
								7.02751	0.0811	0.9189	0.0246	3	0	13
								7.06918	0.073	0.927	0.0234	1	0	10
								7.29834	0.0649	0.9351	0.0222	1	0	9
								7.34001	0.0568	0.9432	0.0208	1	0	8
								7.42334	0.0487	0.9513	0.0194	1	0	7
								7.47543	0.0406	0.9594	0.0178	1	0	6
								7.55876	0.0325	0.9675	0.016	1	0	5
								7.59001	0.0243	0.9757	0.0139	1	0	4
								8.49626	0.0162	0.9838	0.0114	1	0	3
								8.51709	0.0081	0.9919	0.0081	1	0	2
								8.55876	0	1	0	1	0	1

## Sheet: Figure 6E
Figure 6E
AFD(-) 20°C								AFD(-); daf-16 (mu86) 20°C								AFD(-); daf-16(mu86); qyIs292[Pges-1::GFP::daf-16] 20°C
Age at Death (d)	Survival	Failure	SurvStdErr	Number failed	Number censored	At Risk		Age at Death (d)	Survival	Failure	SurvStdErr	Number failed	Number censored	At Risk		Age at Death (d)	Survival	Failure	SurvStdErr	Number failed	Number censored	At Risk
0	1	0	0	0	0	123		0	1	0	0	0	0	176		0	1	0	0	0	0	70
1.81727	0.9919	0.0081	0.0081	1	0	123		0.72352	0.9943	0.0057	0.0057	1	0	176		0.05685	1	0	0	0	5	70
1.82769	0.9837	0.0163	0.0114	1	0	122		0.80685	0.9886	0.0114	0.008	1	0	175		0.18185	0.9846	0.0154	0.0153	1	0	65
1.94227	0.9756	0.0244	0.0139	1	0	121		1.14019	0.983	0.017	0.0098	1	0	174		0.87977	0.9846	0.0154	0.0153	0	1	64
1.97352	0.9675	0.0325	0.016	1	0	120		1.19227	0.9716	0.0284	0.0125	2	0	173		0.98394	0.9846	0.0154	0.0153	0	1	63
1.98394	0.9593	0.0407	0.0178	1	0	119		1.31727	0.9659	0.0341	0.0137	1	0	171		1.17144	0.9846	0.0154	0.0153	0	1	62
2.06727	0.9512	0.0488	0.0194	1	0	118		1.3381	0.9602	0.0398	0.0147	1	0	170		1.18185	0.9685	0.0315	0.0219	1	0	61
2.54644	0.9431	0.0569	0.0209	1	0	117		1.37977	0.9545	0.0455	0.0157	1	0	169		1.3381	0.9523	0.0477	0.0269	1	0	60
2.56727	0.935	0.065	0.0222	1	0	116		1.41102	0.9432	0.0568	0.0174	2	0	168		1.37977	0.9362	0.0638	0.0309	1	0	59
2.60894	0.9187	0.0813	0.0246	2	0	115		1.45269	0.9318	0.0682	0.019	2	0	166		1.47352	0.9201	0.0799	0.0343	1	0	58
2.66102	0.9106	0.0894	0.0257	1	0	113		1.4631	0.9261	0.0739	0.0197	1	0	164		1.56727	0.9201	0.0799	0.0343	0	1	57
2.75477	0.8943	0.1057	0.0277	2	0	112		1.5256	0.9205	0.0795	0.0204	1	0	163		1.62977	0.9201	0.0799	0.0343	0	1	56
2.81727	0.878	0.122	0.0295	2	0	110		1.55685	0.9091	0.0909	0.0217	2	0	162		1.72352	0.9033	0.0967	0.0375	1	1	55
2.82769	0.8699	0.1301	0.0303	1	0	108		1.57769	0.9034	0.0966	0.0223	1	0	160		1.85894	0.8692	0.1308	0.0432	2	0	53
2.85894	0.8618	0.1382	0.0311	1	0	107		1.61935	0.8977	0.1023	0.0228	1	0	159		1.93185	0.8692	0.1308	0.0432	0	1	51
2.9631	0.8537	0.1463	0.0319	1	0	106		1.66102	0.892	0.108	0.0234	1	0	158		2.14019	0.8345	0.1655	0.0479	2	0	50
3.03602	0.8455	0.1545	0.0326	1	0	105		1.67144	0.8807	0.1193	0.0244	2	0	157		2.17144	0.8171	0.1829	0.05	1	0	48
3.06727	0.8374	0.1626	0.0333	1	0	104		1.69227	0.875	0.125	0.0249	1	0	155		2.34852	0.7997	0.2003	0.0519	1	0	47
3.1506	0.8374	0.1626	0.0333	0	1	103		1.70269	0.875	0.125	0.0249	0	1	154		2.4006	0.7823	0.2177	0.0536	1	0	46
3.17144	0.8292	0.1708	0.0339	1	0	102		1.7131	0.8693	0.1307	0.0254	1	1	153		2.43185	0.7649	0.2351	0.0551	1	0	45
3.18185	0.821	0.179	0.0346	1	0	101		1.72352	0.8578	0.1422	0.0263	2	0	151		2.48394	0.7475	0.2525	0.0566	1	0	44
3.19227	0.8128	0.1872	0.0352	1	0	100		1.78602	0.8463	0.1537	0.0272	2	0	149		2.50477	0.7302	0.2698	0.0578	1	0	43
3.2131	0.8046	0.1954	0.0358	1	0	99		1.81727	0.8405	0.1595	0.0276	1	0	147		2.5256	0.7128	0.2872	0.059	1	0	42
3.22352	0.7963	0.2037	0.0364	1	0	98		1.82769	0.8347	0.1653	0.028	1	0	146		2.55685	0.6954	0.3046	0.0601	1	0	41
3.25477	0.7881	0.2119	0.0369	1	0	97		1.8381	0.829	0.171	0.0284	1	0	145		2.59852	0.678	0.322	0.0611	1	0	40
3.28602	0.7799	0.2201	0.0374	1	0	96		1.84852	0.8232	0.1768	0.0288	1	0	144		2.60894	0.6606	0.3394	0.0619	1	0	39
3.30685	0.7635	0.2365	0.0384	2	0	95		1.86935	0.8117	0.1883	0.0295	2	0	143		2.67144	0.6432	0.3568	0.0627	1	0	38
3.31727	0.7553	0.2447	0.0388	1	1	93		1.87977	0.806	0.194	0.0299	1	0	141		2.75477	0.6085	0.3915	0.0639	2	0	37
3.34852	0.747	0.253	0.0393	1	0	91		1.89019	0.8002	0.1998	0.0302	1	0	140		2.85894	0.5911	0.4089	0.0644	1	0	35
3.35894	0.7387	0.2613	0.0397	1	0	90		1.9006	0.7944	0.2056	0.0305	1	0	139		2.9631	0.5737	0.4263	0.0648	1	0	34
3.37977	0.7387	0.2613	0.0397	0	1	89		1.91102	0.7887	0.2113	0.0309	1	0	138		2.97352	0.5563	0.4437	0.0652	1	0	33
3.41102	0.7303	0.2697	0.0401	1	0	88		1.92144	0.7829	0.2171	0.0312	1	0	137		3.00477	0.5389	0.4611	0.0654	1	0	32
3.42144	0.7135	0.2865	0.0409	2	0	87		1.93185	0.7714	0.2286	0.0318	2	0	136		3.23394	0.5215	0.4785	0.0656	1	0	31
3.44227	0.7051	0.2949	0.0413	1	0	85		1.95269	0.7657	0.2343	0.032	1	0	134		3.2756	0.5042	0.4958	0.0656	1	0	30
3.48394	0.6967	0.3033	0.0417	1	0	84		1.9631	0.7599	0.2401	0.0323	1	0	133		3.51519	0.4694	0.5306	0.0656	2	1	29
3.49435	0.6883	0.3117	0.042	1	0	83		1.97352	0.7426	0.2574	0.0331	3	0	132		3.5256	0.4694	0.5306	0.0656	0	2	26
3.51519	0.6799	0.3201	0.0423	1	0	82		1.98394	0.7254	0.2746	0.0338	3	0	129		3.55685	0.4107	0.5893	0.0655	3	0	24
3.5256	0.6715	0.3285	0.0426	1	0	81		1.99435	0.7138	0.2862	0.0342	2	0	126		3.56727	0.4107	0.5893	0.0655	0	1	21
3.55685	0.6548	0.3452	0.0432	2	0	80		2.00477	0.7081	0.2919	0.0344	1	0	124		3.62977	0.3902	0.6098	0.0654	1	1	20
3.5881	0.6464	0.3536	0.0434	1	0	78		2.0256	0.7023	0.2977	0.0346	1	1	123		3.73394	0.3685	0.6315	0.0653	1	0	18
3.60894	0.6296	0.3704	0.0439	2	0	77		2.03602	0.6965	0.3035	0.0348	1	0	121		3.7756	0.3251	0.6749	0.0644	2	0	17
3.66102	0.6212	0.3788	0.0441	1	0	75		2.04644	0.6849	0.3151	0.0352	2	0	120		3.8381	0.3251	0.6749	0.0644	0	1	15
3.67144	0.6128	0.3872	0.0443	1	0	74		2.05685	0.6791	0.3209	0.0354	1	0	118		3.87977	0.3019	0.6981	0.0638	1	0	14
3.7131	0.596	0.404	0.0446	2	0	73		2.06727	0.6733	0.3267	0.0355	1	1	117		3.92144	0.2787	0.7213	0.063	1	0	13
3.73394	0.5876	0.4124	0.0448	1	0	71		2.07769	0.6616	0.3384	0.0359	2	0	115		3.98394	0.2555	0.7445	0.0619	1	0	12
3.75477	0.5792	0.4208	0.0449	1	0	70		2.0881	0.6557	0.3443	0.036	1	0	113		4.09852	0.2322	0.7678	0.0605	1	0	11
3.82769	0.554	0.446	0.0453	3	0	69		2.09852	0.644	0.356	0.0363	2	0	112		4.10894	0.209	0.791	0.0587	1	0	10
3.8381	0.5456	0.4544	0.0454	1	0	66		2.10894	0.6323	0.3677	0.0366	2	0	110		4.29644	0.1858	0.8142	0.0566	1	0	9
3.87977	0.5372	0.4628	0.0454	1	0	65		2.11935	0.6206	0.3794	0.0368	2	0	108		4.44227	0.1626	0.8374	0.0541	1	0	8
3.89019	0.5372	0.4628	0.0454	0	2	64		2.12977	0.6148	0.3852	0.037	1	0	106		4.47352	0.1393	0.8607	0.0511	1	0	7
3.94227	0.5286	0.4714	0.0455	1	0	62		2.14019	0.6089	0.3911	0.0371	1	0	105		4.5881	0.1161	0.8839	0.0476	1	0	6
3.95269	0.5199	0.4801	0.0456	1	0	61		2.1506	0.6089	0.3911	0.0371	0	1	104		4.67144	0.0929	0.9071	0.0434	1	0	5
3.9631	0.5112	0.4888	0.0456	1	0	60		2.16102	0.603	0.397	0.0372	1	0	103		4.72352	0.0697	0.9303	0.0382	1	0	4
3.97352	0.5026	0.4974	0.0457	1	0	59		2.17144	0.5971	0.4029	0.0373	1	0	102		4.81727	0.0464	0.9536	0.0318	1	0	3
3.98394	0.4939	0.5061	0.0457	1	0	58		2.18185	0.5912	0.4088	0.0374	1	0	101		4.87977	0.0232	0.9768	0.0228	1	0	2
4.00477	0.4852	0.5148	0.0457	1	0	57		2.19227	0.5734	0.4266	0.0376	3	0	100		5.1506	0	1	0	1	0	1
4.01519	0.4766	0.5234	0.0457	1	0	56		2.20269	0.5675	0.4325	0.0377	1	1	97
4.0256	0.4766	0.5234	0.0457	0	1	55		2.2131	0.5436	0.4564	0.038	4	0	95
4.03602	0.4678	0.5322	0.0457	1	0	54		2.22352	0.5377	0.4623	0.038	1	1	91
4.04644	0.4589	0.5411	0.0457	1	0	53		2.23394	0.5256	0.4744	0.0381	2	3	89
4.05685	0.4325	0.5675	0.0456	3	0	52		2.24435	0.5068	0.4932	0.0383	3	0	84
4.09852	0.4236	0.5764	0.0455	1	0	49		2.25477	0.4943	0.5057	0.0383	2	0	81
4.10894	0.4148	0.5852	0.0454	1	0	48		2.26519	0.4818	0.5182	0.0384	2	0	79
4.17144	0.4148	0.5852	0.0454	0	1	47		2.2756	0.463	0.537	0.0384	3	0	77
4.18185	0.3968	0.6032	0.0452	2	0	46		2.28602	0.4567	0.5433	0.0383	1	0	74
4.22352	0.3877	0.6123	0.045	1	0	44		2.29644	0.4505	0.5495	0.0383	1	0	73
4.23394	0.3787	0.6213	0.0449	1	0	43		2.30685	0.4442	0.5558	0.0383	1	2	72
4.2756	0.3697	0.6303	0.0447	1	0	42		2.31727	0.4314	0.5686	0.0383	2	0	69
4.3381	0.3607	0.6393	0.0445	1	0	41		2.3381	0.4185	0.5815	0.0382	2	0	67
4.34852	0.3517	0.6483	0.0443	1	1	40		2.34852	0.3992	0.6008	0.038	3	0	65
4.35894	0.3424	0.6576	0.0441	1	0	38		2.35894	0.3863	0.6137	0.0379	2	0	62
4.43185	0.3424	0.6576	0.0441	0	2	37		2.36935	0.3799	0.6201	0.0378	1	0	60
4.47352	0.3229	0.6771	0.0437	2	0	35		2.37977	0.3734	0.6266	0.0377	1	1	59
4.49435	0.3131	0.6869	0.0434	1	0	33		2.39019	0.3669	0.6331	0.0376	1	0	57
4.50477	0.3033	0.6967	0.0432	1	0	32		2.4006	0.3538	0.6462	0.0374	2	0	56
4.5256	0.2935	0.7065	0.0429	1	0	31		2.41102	0.3472	0.6528	0.0372	1	0	54
4.53602	0.2739	0.7261	0.0422	2	0	30		2.42144	0.3472	0.6528	0.0372	0	2	53
4.55685	0.2544	0.7456	0.0414	2	0	28		2.4631	0.3336	0.6664	0.037	2	0	51
4.56727	0.2446	0.7554	0.0409	1	0	26		2.47352	0.32	0.68	0.0367	2	0	49
4.5881	0.2348	0.7652	0.0404	1	0	25		2.48394	0.3064	0.6936	0.0364	2	0	47
4.62977	0.2152	0.7848	0.0394	2	0	24		2.49435	0.2859	0.7141	0.0358	3	0	45
4.64019	0.2152	0.7848	0.0394	0	1	22		2.50477	0.2655	0.7345	0.0352	3	0	42
4.6506	0.205	0.795	0.0388	1	0	21		2.5256	0.2587	0.7413	0.0349	1	0	39
4.68185	0.1947	0.8053	0.0382	1	0	20		2.53602	0.2519	0.7481	0.0347	1	0	38
4.78602	0.164	0.836	0.0361	3	0	19		2.54644	0.2383	0.7617	0.0341	2	0	37
4.79644	0.1537	0.8463	0.0352	1	0	16		2.57769	0.2315	0.7685	0.0338	1	0	35
4.80685	0.1435	0.8565	0.0343	1	0	15		2.59852	0.2179	0.7821	0.0331	2	0	34
4.85894	0.1332	0.8668	0.0334	1	0	14		2.61935	0.211	0.789	0.0328	1	0	32
4.86935	0.1127	0.8873	0.0312	2	0	13		2.62977	0.2042	0.7958	0.0324	1	0	31
4.92144	0.1025	0.8975	0.03	1	0	11		2.66102	0.1974	0.8026	0.0321	1	0	30
4.93185	0.0922	0.9078	0.0287	1	0	10		2.67144	0.1838	0.8162	0.0313	2	0	29
5.03602	0.0922	0.9078	0.0287	0	2	9		2.69227	0.177	0.823	0.0308	1	0	27
5.05685	0.0791	0.9209	0.0275	1	0	7		2.70269	0.1702	0.8298	0.0304	1	0	26
5.07769	0.0791	0.9209	0.0275	0	2	6		2.73394	0.1634	0.8366	0.0299	1	0	25
5.2131	0.0593	0.9407	0.0268	1	0	4		2.74435	0.1566	0.8434	0.0295	1	0	24
5.22352	0.0395	0.9605	0.0241	1	0	3		2.75477	0.1498	0.8502	0.0289	1	0	23
5.26519	0.0198	0.9802	0.0184	1	0	2		2.76519	0.143	0.857	0.0284	1	0	22
5.76519	0	1	0	1	0	1		2.78602	0.1362	0.8638	0.0279	1	0	21
								2.80685	0.1294	0.8706	0.0273	1	0	20
								2.81727	0.1225	0.8775	0.0267	1	0	19
								2.82769	0.1157	0.8843	0.0261	1	0	18
								2.8381	0.1089	0.8911	0.0254	1	0	17
								2.86935	0.0953	0.9047	0.024	2	0	16
								2.87977	0.0885	0.9115	0.0232	1	0	14
								2.9006	0.0817	0.9183	0.0224	1	0	13
								2.91102	0.0749	0.9251	0.0216	1	0	12
								2.92144	0.0681	0.9319	0.0206	1	0	11
								2.94227	0.0613	0.9387	0.0197	1	0	10
								2.97352	0.0545	0.9455	0.0186	1	0	9
								2.98394	0.0477	0.9523	0.0175	1	0	8
								3.01519	0.0272	0.9728	0.0134	3	0	7
								3.03602	0.0204	0.9796	0.0116	1	0	4
								3.06727	0.0136	0.9864	0.0095	1	0	3
								3.10894	0.0068	0.9932	0.0068	1	0	2
								3.36935	0	1	0	1	0	1

## Sheet: Figure 6F
Figure 6F
daf-16(mu86) 20°C → 20°C								daf-16(mu86) 25°C → 20°C								daf-16(mu86) I; qyIs292[Pges-1::GFP::daf-16] 20°C → 20°C								daf-16(mu86) I; qyIs292[Pges-1::GFP::daf-16] 25°C → 20°C
Age at Death (d)	Survival	Failure	SurvStdErr	Number failed	Number censored	At Risk		Age at Death (d)	Survival	Failure	SurvStdErr	Number failed	Number censored	At Risk		Age at Death (d)	Survival	Failure	SurvStdErr	Number failed	Number censored	At Risk		Age at Death (d)	Survival	Failure	SurvStdErr	Number failed	Number censored	At Risk
0	1	0	0	0	0	155		0	1	0	0	0	0	155		0	1	0	0	0	0	116		0	1	0	0	0	0	136
0.95824	0.9935	0.0065	0.0064	1	0	155		0.55199	0.9935	0.0065	0.0064	1	0	155		0.30199	0.9914	0.0086	0.0086	1	0	116		0.08324	0.9926	0.0074	0.0073	1	0	136
1.01032	0.9871	0.0129	0.0091	1	0	154		0.93741	0.9871	0.0129	0.0091	1	0	154		1.26032	0.9828	0.0172	0.0121	1	0	115		0.51032	0.9853	0.0147	0.0103	1	0	135
1.05199	0.9677	0.0323	0.0142	3	0	153		1.11449	0.9806	0.0194	0.0111	1	0	153		1.29157	0.9741	0.0259	0.0147	1	0	114		1.45824	0.9779	0.0221	0.0126	1	0	134
1.13532	0.9613	0.0387	0.0155	1	0	150		1.14574	0.9742	0.0258	0.0127	1	0	152		1.32282	0.9655	0.0345	0.0169	1	0	113		1.46866	0.9706	0.0294	0.0145	1	0	133
1.14574	0.9548	0.0452	0.0167	1	0	149		1.19782	0.9677	0.0323	0.0142	1	0	151		1.34366	0.9483	0.0517	0.0206	2	0	112		1.56241	0.9632	0.0368	0.0161	1	0	132
1.18741	0.9484	0.0516	0.0178	1	0	148		1.24991	0.9613	0.0387	0.0155	1	0	150		1.38532	0.9397	0.0603	0.0221	1	0	110		1.66657	0.9559	0.0441	0.0176	1	0	131
1.21866	0.9355	0.0645	0.0197	2	0	147		1.28116	0.9548	0.0452	0.0167	1	0	149		1.42699	0.931	0.069	0.0235	1	0	109		1.74991	0.9485	0.0515	0.0189	1	0	130
1.23949	0.9226	0.0774	0.0215	2	0	145		1.30199	0.9484	0.0516	0.0178	1	0	148		1.45824	0.9224	0.0776	0.0248	1	0	108		1.80199	0.9338	0.0662	0.0213	2	0	129
1.26032	0.9161	0.0839	0.0223	1	0	143		1.31241	0.9419	0.0581	0.0188	1	0	147		1.46866	0.9052	0.0948	0.0272	2	0	107		1.83324	0.9191	0.0809	0.0234	2	0	127
1.27074	0.9097	0.0903	0.023	1	0	142		1.35407	0.9355	0.0645	0.0197	1	0	146		1.48949	0.8966	0.1034	0.0283	1	0	105		1.84366	0.9118	0.0882	0.0243	1	0	125
1.28116	0.8968	0.1032	0.0244	2	0	141		1.37491	0.929	0.071	0.0206	1	0	145		1.51032	0.8707	0.1293	0.0312	3	0	104		1.85407	0.9044	0.0956	0.0252	1	0	124
1.29157	0.8903	0.1097	0.0251	1	0	139		1.42699	0.9097	0.0903	0.023	3	0	144		1.53116	0.8621	0.1379	0.032	1	0	101		1.88532	0.8971	0.1029	0.0261	1	0	123
1.33324	0.8839	0.1161	0.0257	1	0	138		1.43741	0.9032	0.0968	0.0237	1	0	141		1.55199	0.8448	0.1552	0.0336	2	0	100		1.92699	0.8897	0.1103	0.0269	1	0	122
1.34366	0.871	0.129	0.0269	2	0	137		1.44782	0.8968	0.1032	0.0244	1	0	140		1.57282	0.8276	0.1724	0.0351	2	0	98		2.01032	0.875	0.125	0.0284	2	0	121
1.36449	0.8516	0.1484	0.0286	3	0	135		1.45824	0.8839	0.1161	0.0257	2	0	139		1.59366	0.8103	0.1897	0.0364	2	0	96		2.03116	0.8676	0.1324	0.0291	1	0	119
1.39574	0.8452	0.1548	0.0291	1	0	132		1.46866	0.8774	0.1226	0.0263	1	0	137		1.61449	0.7759	0.2241	0.0387	4	0	94		2.06241	0.8456	0.1544	0.031	3	0	118
1.40616	0.8387	0.1613	0.0295	1	0	131		1.47907	0.871	0.129	0.0269	1	0	136		1.64574	0.7672	0.2328	0.0392	1	0	90		2.07282	0.8382	0.1618	0.0316	1	0	115
1.41657	0.8323	0.1677	0.03	1	0	130		1.53116	0.8645	0.1355	0.0275	1	0	135		1.65616	0.7328	0.2672	0.0411	4	0	89		2.09366	0.8309	0.1691	0.0321	1	0	114
1.42699	0.8258	0.1742	0.0305	1	0	129		1.57282	0.8581	0.1419	0.028	1	0	134		1.66657	0.7155	0.2845	0.0419	2	0	85		2.10407	0.8235	0.1765	0.0327	1	0	113
1.43741	0.8194	0.1806	0.0309	1	0	128		1.59366	0.8516	0.1484	0.0286	1	0	133		1.67699	0.7069	0.2931	0.0423	1	0	83		2.11449	0.8162	0.1838	0.0332	1	0	112
1.44782	0.8129	0.1871	0.0313	1	0	127		1.60407	0.8452	0.1548	0.0291	1	0	132		1.73949	0.6983	0.3017	0.0426	1	0	82		2.14574	0.8088	0.1912	0.0337	1	0	111
1.45824	0.8	0.2	0.0321	2	0	126		1.61449	0.8323	0.1677	0.03	2	0	131		1.74991	0.6897	0.3103	0.043	1	0	81		2.15616	0.8015	0.1985	0.0342	1	0	110
1.47907	0.7935	0.2065	0.0325	1	0	124		1.62491	0.8194	0.1806	0.0309	2	0	129		1.76032	0.681	0.319	0.0433	1	0	80		2.19782	0.7941	0.2059	0.0347	1	0	109
1.51032	0.7806	0.2194	0.0332	2	0	123		1.63532	0.8129	0.1871	0.0313	1	0	127		1.78116	0.6552	0.3448	0.0441	3	15	79		2.21866	0.7868	0.2132	0.0351	1	0	108
1.52074	0.7742	0.2258	0.0336	1	0	121		1.64574	0.8065	0.1935	0.0317	1	0	126		1.80199	0.6337	0.3663	0.0452	2	0	61		2.22907	0.7794	0.2206	0.0356	1	0	107
1.53116	0.7677	0.2323	0.0339	1	0	120		1.65616	0.7871	0.2129	0.0329	3	0	125		1.82282	0.6122	0.3878	0.0462	2	0	59		2.24991	0.7647	0.2353	0.0364	2	0	106
1.54157	0.7613	0.2387	0.0342	1	0	119		1.66657	0.7806	0.2194	0.0332	1	0	122		1.83324	0.5907	0.4093	0.047	2	0	57		2.26032	0.75	0.25	0.0371	2	0	104
1.55199	0.7548	0.2452	0.0346	1	0	118		1.67699	0.7742	0.2258	0.0336	1	0	121		1.84366	0.58	0.42	0.0473	1	0	55		2.29157	0.7426	0.2574	0.0375	1	0	102
1.56241	0.7355	0.2645	0.0354	3	0	117		1.69782	0.7677	0.2323	0.0339	1	0	120		1.86449	0.5585	0.4415	0.048	2	0	54		2.30199	0.7353	0.2647	0.0378	1	0	101
1.57282	0.7226	0.2774	0.036	2	0	114		1.70824	0.7548	0.2452	0.0346	2	0	119		1.91657	0.537	0.463	0.0485	2	0	52		2.33324	0.7279	0.2721	0.0382	1	0	100
1.58324	0.7032	0.2968	0.0367	3	0	112		1.71866	0.7419	0.2581	0.0351	2	0	117		1.92699	0.5263	0.4737	0.0487	1	0	50		2.35407	0.7132	0.2868	0.0388	2	0	99
1.59366	0.6968	0.3032	0.0369	1	0	109		1.72907	0.729	0.271	0.0357	2	0	115		2.01032	0.5048	0.4952	0.049	2	0	49		2.36449	0.6985	0.3015	0.0394	2	0	97
1.60407	0.6903	0.3097	0.0371	1	0	108		1.74991	0.7226	0.2774	0.036	1	0	113		2.05199	0.4833	0.5167	0.0492	2	0	47		2.40616	0.6912	0.3088	0.0396	1	0	95
1.61449	0.6774	0.3226	0.0375	2	13	107		1.76032	0.6968	0.3032	0.0369	4	0	112		2.06241	0.4726	0.5274	0.0493	1	0	45		2.43741	0.6765	0.3235	0.0401	2	0	94
1.62491	0.6701	0.3299	0.0379	1	0	92		1.78116	0.6839	0.3161	0.0373	2	0	108		2.07282	0.4511	0.5489	0.0493	2	0	44		2.44782	0.6691	0.3309	0.0403	1	0	92
1.64574	0.6406	0.3594	0.0389	4	0	91		1.79157	0.6774	0.3226	0.0375	1	0	106		2.09366	0.4296	0.5704	0.0493	2	0	42		2.45824	0.6544	0.3456	0.0408	2	0	91
1.65616	0.6332	0.3668	0.0392	1	0	87		1.80199	0.6581	0.3419	0.0381	3	0	105		2.11449	0.4189	0.5811	0.0492	1	0	40		2.46866	0.6471	0.3529	0.041	1	0	89
1.66657	0.6112	0.3888	0.0398	3	0	86		1.81241	0.6516	0.3484	0.0383	1	0	102		2.12491	0.4081	0.5919	0.0491	1	0	39		2.48949	0.6324	0.3676	0.0413	2	0	88
1.67699	0.6038	0.3962	0.04	1	0	83		1.82282	0.6065	0.3935	0.0392	7	0	101		2.13532	0.3867	0.6133	0.0488	2	0	38		2.49991	0.625	0.375	0.0415	1	0	86
1.68741	0.5891	0.4109	0.0404	2	0	82		1.83324	0.5935	0.4065	0.0395	2	0	94		2.14574	0.3759	0.6241	0.0486	1	0	36		2.51032	0.6176	0.3824	0.0417	1	0	85
1.69782	0.567	0.433	0.0408	3	0	80		1.84366	0.5742	0.4258	0.0397	3	0	92		2.15616	0.3652	0.6348	0.0484	1	0	35		2.52074	0.6103	0.3897	0.0418	1	0	84
1.70824	0.5522	0.4478	0.0411	2	0	77		1.85407	0.5548	0.4452	0.0399	3	0	89		2.16657	0.3544	0.6456	0.0481	1	0	34		2.53116	0.6029	0.3971	0.042	1	0	83
1.71866	0.5375	0.4625	0.0413	2	0	75		1.86449	0.5484	0.4516	0.04	1	0	86		2.17699	0.3437	0.6563	0.0479	1	0	33		2.60407	0.5809	0.4191	0.0423	3	0	82
1.72907	0.5154	0.4846	0.0415	3	0	73		1.87491	0.5419	0.4581	0.04	1	0	85		2.23949	0.333	0.667	0.0476	1	0	32		2.61449	0.5735	0.4265	0.0424	1	0	79
1.74991	0.4933	0.5067	0.0417	3	0	70		1.88532	0.5226	0.4774	0.0401	3	0	84		2.29157	0.3007	0.6993	0.0465	3	0	31		2.62491	0.5515	0.4485	0.0426	3	0	78
1.77074	0.486	0.514	0.0417	1	0	67		1.89574	0.5161	0.4839	0.0401	1	0	81		2.30199	0.2793	0.7207	0.0455	2	0	28		2.63532	0.5441	0.4559	0.0427	1	0	75
1.78116	0.4786	0.5214	0.0417	1	0	66		1.92699	0.5097	0.4903	0.0402	1	0	80		2.32282	0.2685	0.7315	0.045	1	0	26		2.64574	0.5368	0.4632	0.0428	1	0	74
1.79157	0.4712	0.5288	0.0417	1	0	65		1.93741	0.4968	0.5032	0.0402	2	0	79		2.33324	0.2578	0.7422	0.0445	1	0	25		2.65616	0.5221	0.4779	0.0428	2	0	73
1.80199	0.4639	0.5361	0.0417	1	0	64		1.94782	0.4903	0.5097	0.0402	1	0	77		2.36449	0.247	0.753	0.0439	1	0	24		2.66657	0.5147	0.4853	0.0429	1	0	71
1.81241	0.4492	0.5508	0.0416	2	0	63		1.97907	0.4645	0.5355	0.0401	4	0	76		2.37491	0.2363	0.7637	0.0433	1	0	23		2.68741	0.5074	0.4926	0.0429	1	0	70
1.82282	0.4344	0.5656	0.0416	2	0	61		1.99991	0.4516	0.5484	0.04	2	0	72		2.40616	0.2148	0.7852	0.042	2	0	22		2.69782	0.4926	0.5074	0.0429	2	0	69
1.83324	0.4123	0.5877	0.0414	3	0	59		2.01032	0.4452	0.5548	0.0399	1	0	70		2.42699	0.2041	0.7959	0.0412	1	0	20		2.71866	0.4853	0.5147	0.0429	1	0	67
1.84366	0.405	0.595	0.0413	1	0	56		2.02074	0.4323	0.5677	0.0398	2	0	69		2.45824	0.1933	0.8067	0.0404	1	0	19		2.76032	0.4779	0.5221	0.0428	1	0	66
1.85407	0.3976	0.6024	0.0412	1	0	55		2.06241	0.4129	0.5871	0.0395	3	0	67		2.48949	0.1826	0.8174	0.0396	1	0	18		2.78116	0.4706	0.5294	0.0428	1	0	65
1.86449	0.3903	0.6097	0.0411	1	0	54		2.07282	0.4065	0.5935	0.0395	1	0	64		2.49991	0.1718	0.8282	0.0387	1	0	17		2.81241	0.4485	0.5515	0.0426	3	0	64
1.88532	0.3755	0.6245	0.0408	2	0	53		2.08324	0.4	0.6	0.0393	1	0	63		2.54157	0.1611	0.8389	0.0377	1	0	16		2.84366	0.4412	0.5588	0.0426	1	0	61
1.89574	0.3682	0.6318	0.0407	1	0	51		2.09366	0.3871	0.6129	0.0391	2	0	62		2.55199	0.1504	0.8496	0.0367	1	0	15		2.86449	0.4338	0.5662	0.0425	1	0	60
1.90616	0.3534	0.6466	0.0404	2	0	50		2.10407	0.3742	0.6258	0.0389	2	0	60		2.58324	0.1074	0.8926	0.0319	4	0	14		2.87491	0.4265	0.5735	0.0424	1	0	59
1.91657	0.3313	0.6687	0.0398	3	0	48		2.11449	0.3548	0.6452	0.0384	3	0	58		2.65616	0.0967	0.9033	0.0305	1	0	10		2.88532	0.4044	0.5956	0.0421	3	0	58
1.92699	0.324	0.676	0.0396	1	0	45		2.13532	0.3484	0.6516	0.0383	1	0	55		2.67699	0.0752	0.9248	0.0272	2	0	9		2.90616	0.3897	0.6103	0.0418	2	0	55
1.93741	0.3019	0.6981	0.0389	3	0	44		2.14574	0.3419	0.6581	0.0381	1	0	54		2.69782	0.0644	0.9356	0.0254	1	0	7		2.95824	0.3824	0.6176	0.0417	1	0	53
1.94782	0.2798	0.7202	0.0381	3	0	41		2.15616	0.3226	0.6774	0.0375	3	0	53		2.79157	0.0537	0.9463	0.0233	1	0	6		2.96866	0.3676	0.6324	0.0413	2	0	52
1.96866	0.2724	0.7276	0.0378	1	0	38		2.16657	0.3097	0.6903	0.0371	2	0	50		2.82282	0.043	0.957	0.021	1	0	5		3.01032	0.3529	0.6471	0.041	2	0	50
1.98949	0.2504	0.7496	0.0368	3	0	37		2.17699	0.2968	0.7032	0.0367	2	0	48		2.92699	0.0322	0.9678	0.0183	1	0	4		3.02074	0.3456	0.6544	0.0408	1	0	48
1.99991	0.243	0.757	0.0365	1	0	34		2.18741	0.2903	0.7097	0.0365	1	0	46		2.96866	0.0215	0.9785	0.015	1	0	3		3.04157	0.3382	0.6618	0.0406	1	0	47
2.01032	0.2356	0.7644	0.0361	1	0	33		2.19782	0.2774	0.7226	0.036	2	0	45		3.11449	0.0107	0.9893	0.0107	1	0	2		3.06241	0.3309	0.6691	0.0403	1	0	46
2.02074	0.2135	0.7865	0.0349	3	0	32		2.20824	0.271	0.729	0.0357	1	0	43		3.37491	0	1	0	1	0	1		3.07282	0.3235	0.6765	0.0401	1	0	45
2.03116	0.1988	0.8012	0.034	2	0	29		2.22907	0.2645	0.7355	0.0354	1	0	42										3.09366	0.3162	0.6838	0.0399	1	0	44
2.04157	0.1914	0.8086	0.0335	1	0	27		2.27074	0.2516	0.7484	0.0349	2	0	41										3.10407	0.3088	0.6912	0.0396	1	0	43
2.05199	0.1841	0.8159	0.033	1	0	26		2.29157	0.2452	0.7548	0.0346	1	0	39										3.13532	0.2941	0.7059	0.0391	2	0	42
2.06241	0.1767	0.8233	0.0325	1	0	25		2.30199	0.2387	0.7613	0.0342	1	0	38										3.16657	0.2868	0.7132	0.0388	1	0	40
2.09366	0.162	0.838	0.0314	2	0	24		2.31241	0.2258	0.7742	0.0336	2	0	37										3.17699	0.2721	0.7279	0.0382	2	0	39
2.10407	0.1473	0.8527	0.0303	2	0	22		2.33324	0.2194	0.7806	0.0332	1	0	35										3.23949	0.2647	0.7353	0.0378	1	0	37
2.11449	0.1399	0.8601	0.0296	1	0	20		2.34366	0.2065	0.7935	0.0325	2	0	34										3.24991	0.2574	0.7426	0.0375	1	0	36
2.12491	0.1252	0.8748	0.0283	2	0	19		2.35407	0.1871	0.8129	0.0313	3	0	32										3.27074	0.2426	0.7574	0.0368	2	0	35
2.15616	0.1104	0.8896	0.0268	2	0	17		2.36449	0.1806	0.8194	0.0309	1	0	29										3.32282	0.2353	0.7647	0.0364	1	0	33
2.16657	0.1031	0.8969	0.026	1	0	15		2.39574	0.1742	0.8258	0.0305	1	0	28										3.34366	0.2279	0.7721	0.036	1	0	32
2.17699	0.0957	0.9043	0.0252	1	0	14		2.41657	0.1677	0.8323	0.03	1	0	27										3.36449	0.2132	0.7868	0.0351	2	0	31
2.20824	0.0884	0.9116	0.0243	1	0	13		2.42699	0.1548	0.8452	0.0291	2	0	26										3.38532	0.2059	0.7941	0.0347	1	0	29
2.24991	0.0736	0.9264	0.0224	2	0	12		2.45824	0.1484	0.8516	0.0286	1	0	24										3.39574	0.1912	0.8088	0.0337	2	0	28
2.28116	0.0663	0.9337	0.0213	1	0	10		2.46866	0.1355	0.8645	0.0275	2	0	23										3.41657	0.1838	0.8162	0.0332	1	0	26
2.29157	0.0589	0.9411	0.0202	1	0	9		2.47907	0.129	0.871	0.0269	1	0	21										3.44782	0.1691	0.8309	0.0321	2	0	25
2.30199	0.0515	0.9485	0.0189	1	0	8		2.49991	0.1161	0.8839	0.0257	2	0	20										3.45824	0.1618	0.8382	0.0316	1	0	23
2.40616	0.0442	0.9558	0.0176	1	0	7		2.52074	0.1097	0.8903	0.0251	1	0	18										3.49991	0.1544	0.8456	0.031	1	0	22
2.43741	0.0368	0.9632	0.0161	1	0	6		2.54157	0.0968	0.9032	0.0237	2	0	17										3.53116	0.1471	0.8529	0.0304	1	0	21
2.46866	0.0295	0.9705	0.0145	1	0	5		2.56241	0.0903	0.9097	0.023	1	0	15										3.54157	0.1397	0.8603	0.0297	1	0	20
2.52074	0.0221	0.9779	0.0126	1	0	4		2.60407	0.071	0.929	0.0206	3	0	14										3.57282	0.1324	0.8676	0.0291	1	0	19
2.53116	0.0147	0.9853	0.0103	1	0	3		2.62491	0.0645	0.9355	0.0197	1	0	11										3.63532	0.1176	0.8824	0.0276	2	0	18
2.61449	0.0074	0.9926	0.0073	1	0	2		2.69782	0.0581	0.9419	0.0188	1	0	10										3.64574	0.1103	0.8897	0.0269	1	0	16
2.83324	0	1	0	1	0	1		2.70824	0.0452	0.9548	0.0167	2	0	9										3.79157	0.1029	0.8971	0.0261	1	0	15
								2.72907	0.0387	0.9613	0.0155	1	0	7										3.81241	0.0956	0.9044	0.0252	1	0	14
								2.73949	0.0323	0.9677	0.0142	1	0	6										3.83324	0.0882	0.9118	0.0243	1	0	13
								2.74991	0.0258	0.9742	0.0127	1	0	5										3.85407	0.0809	0.9191	0.0234	1	0	12
								2.93741	0.0194	0.9806	0.0111	1	0	4										3.95824	0.0735	0.9265	0.0224	1	0	11
								3.03116	0.0129	0.9871	0.0091	1	0	3										3.97907	0.0588	0.9412	0.0202	2	0	10
								3.08324	0.0065	0.9935	0.0064	1	0	2										3.98949	0.0515	0.9485	0.0189	1	0	8
								3.51032	0	1	0	1	0	1										4.02074	0.0441	0.9559	0.0176	1	0	7
																								4.04157	0.0368	0.9632	0.0161	1	0	6
																								4.06241	0.0294	0.9706	0.0145	1	0	5
																								4.07282	0.0221	0.9779	0.0126	1	0	4
																								4.24991	0.0147	0.9853	0.0103	1	0	3
																								4.38532	0.0074	0.9926	0.0073	1	0	2
																								4.43741	0	1	0	1	0	1
