# Supplementary material for: Neuronal temperature perception induces specific defenses that enable C. elegans to cope with the enhanced reactivity of hydrogen peroxide at high temperature
Source: eLife. 2022 Oct 13;11:e78941. doi: 10.7554/eLife.78941 (PMC9635881; doi:10.7554/eLife.78941)
Supplement: Figure 7—source data 1. [file elife-78941-fig7-data1.xlsx]

## Sheet: Figure 7B
Figure 7B
wild type + empty vector 20°C								AFD ablation + empty vector 20°C								wild type + skn-1(RNAi) 20°C								AFD ablation + skn-1(RNAi) 20°C
Age at Death (d)	Survival	Failure	SurvStdErr	Number failed	Number censored	At Risk		Age at Death (d)	Survival	Failure	SurvStdErr	Number failed	Number censored	At Risk		Age at Death (d)	Survival	Failure	SurvStdErr	Number failed	Number censored	At Risk		Age at Death (d)	Survival	Failure	SurvStdErr	Number failed	Number censored	At Risk
0	1	0	0	0	0	141		0	1	0	0	0	0	115		0	1	0	0	0	0	132		0	1	0	0	0	0	77
0.3587	0.9929	0.0071	0.0071	1	0	141		1.8309	0.9913	0.0087	0.0087	1	0	115		0.23995	0.9924	0.0076	0.0075	1	0	132		0.07398	0.987	0.013	0.0129	1	0	77
1.63718	0.9858	0.0142	0.01	1	0	140		1.9698	0.9826	0.0174	0.0122	1	0	114		0.80801	0.9848	0.0152	0.0106	1	0	131		0.13995	0.974	0.026	0.0181	1	0	76
1.87259	0.9787	0.0213	0.0122	1	0	139		2.9143	0.9739	0.0261	0.0149	1	0	113		0.89273	0.9773	0.0227	0.013	1	0	130		0.59829	0.961	0.039	0.0221	1	0	75
1.94134	0.9716	0.0284	0.014	1	0	138		2.9677	0.9652	0.0348	0.0171	1	0	112		0.92745	0.9697	0.0303	0.0149	1	0	129		1.48579	0.9481	0.0519	0.0253	1	0	74
1.97051	0.9645	0.0355	0.0156	1	0	137		3.2316	0.9565	0.0435	0.019	1	0	111		0.93301	0.9621	0.0379	0.0166	1	0	128		1.78231	0.9351	0.0649	0.0281	1	0	73
1.98301	0.9574	0.0426	0.017	1	0	136		3.2476	0.9478	0.0522	0.0207	1	0	110		0.96148	0.9545	0.0455	0.0181	1	0	127		1.80662	0.9221	0.0779	0.0305	1	0	72
2.04551	0.9504	0.0496	0.0183	1	0	135		3.3309	0.9391	0.0609	0.0223	1	0	109		0.9969	0.947	0.053	0.0195	1	0	126		1.90731	0.9091	0.0909	0.0328	1	0	71
2.05384	0.9433	0.0567	0.0195	1	0	134		3.7198	0.9304	0.0696	0.0237	1	0	108		1.01079	0.9394	0.0606	0.0208	1	0	125		1.96981	0.8961	0.1039	0.0348	1	0	70
2.09551	0.9362	0.0638	0.0206	1	0	133		3.8865	0.9217	0.0783	0.025	1	0	107		1.12051	0.9318	0.0682	0.0219	1	0	124		2.00801	0.8701	0.1299	0.0383	2	0	69
2.13718	0.9291	0.0709	0.0216	1	0	132		3.9816	0.913	0.087	0.0263	1	0	106		1.1219	0.9242	0.0758	0.023	1	0	123		2.09829	0.8571	0.1429	0.0399	1	0	67
2.17884	0.9149	0.0851	0.0235	2	0	131		4.2059	0.9043	0.0957	0.0274	1	0	105		1.20523	0.9167	0.0833	0.0241	1	0	122		2.11079	0.8442	0.1558	0.0413	1	0	66
2.19134	0.9078	0.0922	0.0244	1	0	129		4.2476	0.8957	0.1043	0.0285	1	0	104		1.28856	0.9091	0.0909	0.025	1	0	121		2.15245	0.8312	0.1688	0.0427	1	0	65
2.22051	0.8936	0.1064	0.026	2	12	128		4.3865	0.887	0.113	0.0295	1	0	103		1.33023	0.8864	0.1136	0.0276	3	0	120		2.19898	0.8182	0.1818	0.044	1	0	64
2.26218	0.8858	0.1142	0.0269	1	0	114		4.3983	0.8783	0.1217	0.0305	1	0	102		1.37051	0.8788	0.1212	0.0284	1	0	117		2.30315	0.8052	0.1948	0.0451	1	0	63
2.28301	0.8779	0.1221	0.0278	1	0	113		4.5532	0.8696	0.1304	0.0314	1	0	101		1.39898	0.8712	0.1288	0.0292	1	0	116		2.32398	0.7922	0.2078	0.0462	1	0	62
2.30384	0.8701	0.1299	0.0286	1	0	112		4.565	0.8609	0.1391	0.0323	1	0	100		1.41218	0.8636	0.1364	0.0299	1	0	115		2.36079	0.7792	0.2208	0.0473	1	0	61
2.31634	0.8387	0.1613	0.0316	4	0	111		4.69	0.8522	0.1478	0.0331	1	0	99		1.41356	0.8485	0.1515	0.0312	2	0	114		2.36565	0.7662	0.2338	0.0482	1	0	60
2.33093	0.8074	0.1926	0.0341	4	0	107		4.7407	0.8348	0.1652	0.0346	2	0	98		1.44065	0.8333	0.1667	0.0324	2	0	112		2.38301	0.7532	0.2468	0.0491	1	0	59
2.34551	0.7917	0.2083	0.0352	2	0	103		4.815	0.8261	0.1739	0.0353	1	0	96		1.44829	0.8258	0.1742	0.033	1	0	110		2.40245	0.7273	0.2727	0.0508	2	0	58
2.36634	0.7839	0.2161	0.0357	1	0	101		4.8427	0.8087	0.1913	0.0367	2	0	95		1.45384	0.8182	0.1818	0.0336	1	0	109		2.44412	0.7143	0.2857	0.0515	1	0	56
2.37259	0.776	0.224	0.0362	1	0	100		4.94	0.8	0.2	0.0373	1	0	93		1.48995	0.8106	0.1894	0.0341	1	0	108		2.47329	0.7013	0.2987	0.0522	1	0	55
2.38718	0.7682	0.2318	0.0367	1	0	99		4.9816	0.7913	0.2087	0.0379	1	0	92		1.49551	0.803	0.197	0.0346	1	0	107		2.49065	0.6883	0.3117	0.0528	1	0	54
2.39968	0.7525	0.2475	0.0375	2	0	98		5.1761	0.7826	0.2174	0.0385	1	0	91		1.4969	0.7955	0.2045	0.0351	1	0	106		2.50801	0.6753	0.3247	0.0534	1	0	53
2.40037	0.7447	0.2553	0.038	1	0	96		5.2198	0.7739	0.2261	0.039	1	0	90		1.51079	0.7879	0.2121	0.0356	1	0	105		2.53231	0.6623	0.3377	0.0539	1	0	52
2.42884	0.7368	0.2632	0.0384	1	0	95		5.2615	0.7652	0.2348	0.0395	1	0	89		1.53856	0.7803	0.2197	0.036	1	0	104		2.54968	0.6364	0.3636	0.0548	2	0	51
2.44134	0.729	0.271	0.0387	1	0	94		5.2823	0.7565	0.2435	0.04	1	0	88		1.57884	0.7727	0.2273	0.0365	1	0	103		2.55662	0.6234	0.3766	0.0552	1	0	49
2.4837	0.7212	0.2788	0.0391	1	0	93		5.2893	0.7478	0.2522	0.0405	1	0	87		1.62051	0.7652	0.2348	0.0369	1	0	102		2.56912	0.6104	0.3896	0.0556	1	0	48
2.49759	0.7055	0.2945	0.0398	2	0	92		5.3448	0.7391	0.2609	0.0409	1	0	86		1.64134	0.7576	0.2424	0.0373	1	0	101		2.61079	0.5974	0.4026	0.0559	1	0	47
2.51218	0.6898	0.3102	0.0404	2	0	90		5.3844	0.7304	0.2696	0.0414	1	0	85		1.65662	0.75	0.25	0.0377	1	0	100		2.63162	0.5844	0.4156	0.0562	1	0	46
2.52468	0.682	0.318	0.0407	1	0	88		5.4143	0.7217	0.2783	0.0418	1	0	84		1.67745	0.7348	0.2652	0.0384	2	0	99		2.63301	0.5714	0.4286	0.0564	1	0	45
2.55384	0.6663	0.3337	0.0413	2	0	87		5.4677	0.713	0.287	0.0422	1	0	83		1.69065	0.7273	0.2727	0.0388	1	0	97		2.65731	0.5584	0.4416	0.0566	1	0	44
2.60176	0.6585	0.3415	0.0415	1	0	85		5.5233	0.7043	0.2957	0.0426	1	0	82		1.70523	0.7197	0.2803	0.0391	1	0	96		2.67468	0.5455	0.4545	0.0567	1	0	43
2.61634	0.6506	0.3494	0.0418	1	0	84		5.574	0.6957	0.3043	0.0429	1	0	81		1.71912	0.7121	0.2879	0.0394	1	0	95		2.71634	0.5325	0.4675	0.0569	1	0	42
2.62259	0.6349	0.3651	0.0422	2	0	83		5.5809	0.687	0.313	0.0432	1	0	80		1.73995	0.7045	0.2955	0.0397	1	0	94		2.72329	0.5195	0.4805	0.0569	1	0	41
2.64968	0.6193	0.3807	0.0426	2	0	81		5.6483	0.6783	0.3217	0.0436	1	0	79		1.74551	0.697	0.303	0.04	1	0	93		2.75801	0.5065	0.4935	0.057	1	0	40
2.65037	0.5957	0.4043	0.0431	3	0	79		5.7594	0.6696	0.3304	0.0439	1	0	78		1.7469	0.6818	0.3182	0.0405	2	0	92		2.77745	0.4935	0.5065	0.057	1	0	39
2.66426	0.5879	0.4121	0.0432	1	0	76		5.8309	0.6609	0.3391	0.0441	1	0	77		1.76634	0.6742	0.3258	0.0408	1	0	90		2.79968	0.4805	0.5195	0.0569	1	0	38
2.6712	0.5801	0.4199	0.0434	1	0	75		5.8448	0.6435	0.3565	0.0447	2	0	76		1.77398	0.6667	0.3333	0.041	1	0	89		2.81912	0.4675	0.5325	0.0569	1	0	37
2.69134	0.5566	0.4434	0.0437	3	0	74		5.8566	0.6348	0.3652	0.0449	1	0	74		1.78162	0.6591	0.3409	0.0413	1	0	88		2.82398	0.4545	0.5455	0.0567	1	0	36
2.69204	0.5252	0.4748	0.0439	4	0	71		5.9261	0.6174	0.3826	0.0453	2	0	73		1.78718	0.6515	0.3485	0.0415	1	0	87		2.84829	0.4416	0.5584	0.0566	1	0	35
2.70593	0.5017	0.4983	0.044	3	0	67		5.9559	0.6087	0.3913	0.0455	1	0	71		1.80245	0.6288	0.3712	0.0421	3	0	86		2.88301	0.4286	0.5714	0.0564	1	0	34
2.72051	0.4703	0.5297	0.044	4	0	64		5.9816	0.6	0.4	0.0457	1	0	70		1.81565	0.6212	0.3788	0.0422	1	0	83		2.90245	0.4156	0.5844	0.0562	1	0	33
2.73301	0.4546	0.5454	0.0439	2	0	60		6.0115	0.5913	0.4087	0.0458	1	0	69		1.82884	0.6136	0.3864	0.0424	1	0	82		2.90731	0.4026	0.5974	0.0559	1	0	32
2.76218	0.4233	0.5767	0.0436	4	0	58		6.1344	0.5826	0.4174	0.046	1	0	68		1.83023	0.6061	0.3939	0.0425	1	0	81		2.94412	0.3896	0.6104	0.0556	1	0	31
2.77537	0.4155	0.5845	0.0435	1	0	54		6.1483	0.5739	0.4261	0.0461	1	0	67		1.84968	0.5909	0.4091	0.0428	2	0	80		2.96634	0.3636	0.6364	0.0548	2	0	30
2.78926	0.4076	0.5924	0.0433	1	0	53		6.2476	0.5652	0.4348	0.0462	1	0	66		1.85731	0.5833	0.4167	0.0429	1	0	78		2.98579	0.3506	0.6494	0.0544	1	0	28
2.81634	0.3998	0.6002	0.0432	1	0	52		6.2802	0.5565	0.4435	0.0463	1	0	65		1.86495	0.5682	0.4318	0.0431	2	0	77		2.99065	0.3377	0.6623	0.0539	1	0	27
2.81704	0.3684	0.6316	0.0426	4	0	51		6.3011	0.5478	0.4522	0.0464	1	0	64		1.87815	0.5606	0.4394	0.0432	1	0	75		3.04968	0.3247	0.6753	0.0534	1	0	26
2.83093	0.3527	0.6473	0.0422	2	0	47		6.3032	0.5391	0.4609	0.0465	1	0	63		1.88579	0.5455	0.4545	0.0433	2	0	74		3.09134	0.3117	0.6883	0.0528	1	0	25
2.84551	0.3449	0.6551	0.042	1	0	45		6.315	0.5304	0.4696	0.0465	1	0	62		1.89134	0.5379	0.4621	0.0434	1	0	72		3.15245	0.2987	0.7013	0.0522	1	0	24
2.85801	0.3371	0.6629	0.0417	1	0	44		6.3566	0.5217	0.4783	0.0466	1	0	61		1.89898	0.5303	0.4697	0.0434	1	0	71		3.17468	0.2857	0.7143	0.0515	1	0	23
2.8587	0.3292	0.6708	0.0415	1	0	43		6.4073	0.513	0.487	0.0466	1	0	60		1.91218	0.5227	0.4773	0.0435	1	0	70		3.21634	0.2727	0.7273	0.0508	1	0	22
2.90037	0.3214	0.6786	0.0412	1	0	42		6.4143	0.5043	0.4957	0.0466	1	0	59		1.93301	0.5152	0.4848	0.0435	1	0	69		3.21981	0.2597	0.7403	0.05	1	0	21
2.91426	0.3057	0.6943	0.0407	2	0	41		6.4559	0.487	0.513	0.0466	2	0	58		1.94065	0.5076	0.4924	0.0435	1	0	68		3.24065	0.2338	0.7662	0.0482	2	0	20
2.94134	0.2744	0.7256	0.0394	4	0	39		6.5094	0.4783	0.5217	0.0466	1	0	56		1.95384	0.5	0.5	0.0435	1	0	67		3.36079	0.2208	0.7792	0.0473	1	0	18
2.94204	0.2665	0.7335	0.0391	1	0	35		6.5511	0.4696	0.5304	0.0465	1	0	55		1.95523	0.4924	0.5076	0.0435	1	0	66		3.42468	0.2078	0.7922	0.0462	1	0	17
2.98301	0.2508	0.7492	0.0383	2	0	34		6.5532	0.4609	0.5391	0.0465	1	0	54		1.98231	0.4848	0.5152	0.0435	1	0	65		3.43162	0.1818	0.8182	0.044	2	0	16
2.9837	0.243	0.757	0.0379	1	0	32		6.6365	0.4522	0.5478	0.0464	1	0	53		1.99551	0.4773	0.5227	0.0435	1	0	64		3.49065	0.1558	0.8442	0.0413	2	0	14
3.01218	0.2352	0.7648	0.0375	1	0	31		6.6782	0.4435	0.5565	0.0463	1	0	52		1.9969	0.4697	0.5303	0.0434	1	0	63		3.61079	0.1429	0.8571	0.0399	1	0	12
3.02537	0.2273	0.7727	0.037	1	0	30		6.7177	0.4348	0.5652	0.0462	1	0	51		2.01079	0.4545	0.5455	0.0433	2	0	62		3.72329	0.1169	0.8831	0.0366	2	0	11
3.06704	0.2116	0.7884	0.0361	2	0	29		6.8011	0.4261	0.5739	0.0461	1	0	50		2.03162	0.4394	0.5606	0.0432	2	0	60		3.76495	0.1039	0.8961	0.0348	1	0	9
3.10801	0.2038	0.7962	0.0356	1	0	27		6.8448	0.4174	0.5826	0.046	1	0	49		2.03718	0.4318	0.5682	0.0431	1	0	58		3.77884	0.0909	0.9091	0.0328	1	0	8
3.12259	0.196	0.804	0.0351	1	0	26		6.9282	0.4087	0.5913	0.0458	1	0	48		2.03856	0.4242	0.5758	0.043	1	0	57		3.92468	0.0779	0.9221	0.0305	1	0	7
3.15037	0.1646	0.8354	0.0328	4	0	25		7.1344	0.4	0.6	0.0457	1	0	47		2.09412	0.4091	0.5909	0.0428	2	0	56		3.96634	0.0649	0.9351	0.0281	1	0	6
3.19134	0.1568	0.8432	0.0322	1	0	21		7.1761	0.3913	0.6087	0.0455	1	0	46		2.10731	0.3939	0.6061	0.0425	2	0	54		3.97329	0.0519	0.9481	0.0253	1	0	5
3.20593	0.1333	0.8667	0.0301	3	0	20		7.2316	0.3826	0.6174	0.0453	1	0	45		2.12051	0.3864	0.6136	0.0424	1	0	52		4.27745	0.039	0.961	0.0221	1	0	4
3.23301	0.1254	0.8746	0.0293	1	0	17		7.2594	0.3739	0.6261	0.0451	1	0	44		2.1219	0.3561	0.6439	0.0417	4	0	51		4.53231	0.026	0.974	0.0181	1	0	3
3.2337	0.1176	0.8824	0.0285	1	0	16		7.2733	0.3652	0.6348	0.0449	1	0	43		2.13579	0.3333	0.6667	0.041	3	0	47		4.54968	0.013	0.987	0.0129	1	0	2
3.27537	0.1097	0.8903	0.0277	1	0	15		7.4143	0.3565	0.6435	0.0447	1	0	42		2.14898	0.3258	0.6742	0.0408	1	0	44		5.21634	0	1	0	1	0	1
3.33093	0.1019	0.8981	0.0268	1	0	14		7.44	0.3478	0.6522	0.0444	1	0	41		2.15662	0.3182	0.6818	0.0405	1	0	43
3.35801	0.0941	0.9059	0.0258	1	0	13		7.4698	0.3391	0.6609	0.0441	1	0	40		2.16218	0.3106	0.6894	0.0403	1	0	42
3.3587	0.0784	0.9216	0.0238	2	0	12		7.5094	0.3304	0.6696	0.0439	1	0	39		2.16356	0.303	0.697	0.04	1	0	41
3.40037	0.0705	0.9295	0.0227	1	0	10		7.6066	0.3217	0.6783	0.0436	1	0	38		2.19065	0.2879	0.7121	0.0394	2	0	40
3.44204	0.0627	0.9373	0.0215	1	0	9		7.6226	0.313	0.687	0.0432	1	0	37		2.19829	0.2803	0.7197	0.0391	1	0	38
3.4837	0.0549	0.9451	0.0202	1	0	8		7.6782	0.3043	0.6957	0.0429	1	0	36		2.20384	0.2727	0.7273	0.0388	1	0	37
3.56704	0.047	0.953	0.0187	1	0	7		7.7059	0.2957	0.7043	0.0426	1	0	35		2.24551	0.2652	0.7348	0.0384	1	0	36
3.89968	0.0392	0.9608	0.0172	1	0	6		7.7476	0.287	0.713	0.0422	1	0	34		2.26079	0.25	0.75	0.0377	2	0	35
3.90037	0.0314	0.9686	0.0154	1	0	5		7.7733	0.2783	0.7217	0.0418	1	0	33		2.27398	0.2424	0.7576	0.0373	1	0	33
4.38718	0.0235	0.9765	0.0134	1	0	4		7.94	0.2696	0.7304	0.0414	1	0	32		2.29481	0.2348	0.7652	0.0369	1	0	32
4.47051	0.0157	0.9843	0.011	1	0	3		8.0115	0.2609	0.7391	0.0409	1	0	31		2.34412	0.2273	0.7727	0.0365	1	0	31
4.92884	0.0078	0.9922	0.0078	1	0	2		8.065	0.2522	0.7478	0.0405	1	0	30		2.38579	0.2197	0.7803	0.036	1	0	30
5.02537	0	1	0	1	0	1		8.1226	0.2435	0.7565	0.04	1	0	29		2.41218	0.2121	0.7879	0.0356	1	0	29
								8.2316	0.2348	0.7652	0.0395	1	0	28		2.41356	0.2045	0.7955	0.0351	1	0	28
								8.2893	0.2261	0.7739	0.039	1	0	27		2.46912	0.1894	0.8106	0.0341	2	0	27
								8.4143	0.2174	0.7826	0.0385	1	0	26		2.48231	0.1742	0.8258	0.033	2	0	25
								8.4559	0.2087	0.7913	0.0379	1	0	25		2.49551	0.1591	0.8409	0.0318	2	0	23
								8.5511	0.2	0.8	0.0373	1	0	24		2.51079	0.1439	0.8561	0.0306	2	0	21
								8.5532	0.1913	0.8087	0.0367	1	0	23		2.59412	0.1364	0.8636	0.0299	1	0	19
								8.5809	0.1913	0.8087	0.0367	0	6	22		2.62051	0.1288	0.8712	0.0292	1	0	18
								8.5948	0.1793	0.8207	0.0363	1	0	16		2.64898	0.1212	0.8788	0.0284	1	0	17
								8.6365	0.1674	0.8326	0.0358	1	0	15		2.66218	0.1136	0.8864	0.0276	1	0	16
								8.7177	0.1554	0.8446	0.0352	1	0	14		2.74551	0.1061	0.8939	0.0268	1	0	15
								8.8983	0.1435	0.8565	0.0344	1	0	13		2.77398	0.0985	0.9015	0.0259	1	0	14
								9.0094	0.1315	0.8685	0.0336	1	0	12		2.85731	0.0909	0.9091	0.025	1	0	13
								9.3566	0.1196	0.8804	0.0326	1	0	11		2.87051	0.0833	0.9167	0.0241	1	0	12
								9.4677	0.1076	0.8924	0.0314	1	0	10		2.89134	0.0758	0.9242	0.023	1	0	11
								9.5809	0.0957	0.9043	0.0301	1	0	9		2.94065	0.0682	0.9318	0.0219	1	0	10
								9.6344	0.0837	0.9163	0.0286	1	0	8		3.06565	0.0606	0.9394	0.0208	1	0	9
								9.7594	0.0717	0.9283	0.0269	1	0	7		3.15662	0.053	0.947	0.0195	1	0	8
								10.3566	0.0598	0.9402	0.025	1	0	6		3.44065	0.0455	0.9545	0.0181	1	0	7
								10.5115	0.0478	0.9522	0.0226	1	0	5		3.45384	0.0379	0.9621	0.0166	1	0	6
								10.5531	0.0359	0.9641	0.0199	1	0	4		3.58023	0.0303	0.9697	0.0149	1	0	5
								10.8844	0.0239	0.9761	0.0165	1	0	3		3.71912	0.0227	0.9773	0.013	1	0	4
								10.8983	0.012	0.988	0.0118	1	0	2		4.16356	0.0152	0.9848	0.0106	1	0	3
								10.9281	0	1	0	1	0	1		4.34412	0.0076	0.9924	0.0075	1	0	2
																4.42745	0	1	0	1	0	1

## Sheet: Figure 7C
Figure 7C
daf-16(mu86) + empty vector 20°C								AFD(-); daf-16(mu86) + empty vector 20°C								daf-16(mu86) + skn-1(RNAi) 20°C								AFD(-); daf-16(mu86) + skn-1(RNAi) 20°C
Age at Death (d)	Survival	Failure	SurvStdErr	Number failed	Number censored	At Risk		Age at Death (d)	Survival	Failure	SurvStdErr	Number failed	Number censored	At Risk		Age at Death (d)	Survival	Failure	SurvStdErr	Number failed	Number censored	At Risk		Age at Death (d)	Survival	Failure	SurvStdErr	Number failed	Number censored	At Risk
0	1	0	0	0	0	161		0	1	0	0	0	0	166		0	1	0	0	0	0	77		0	1	0	0	0	0	172
0.17875	1	0	0	0	2	161		0.04611	0.994	0.006	0.006	1	0	166		0.04125	0.987	0.013	0.0129	1	0	77		0.11486	0.9942	0.0058	0.0058	1	0	172
0.22042	1	0	0	0	2	159		0.05792	0.988	0.012	0.0085	1	0	165		0.13569	0.987	0.013	0.0129	0	1	76		0.15375	0.9942	0.0058	0.0058	0	3	171
0.30792	1	0	0	0	2	157		0.25792	0.9819	0.0181	0.0103	1	0	164		0.17736	0.9739	0.0261	0.0182	1	0	75		0.58639	0.9883	0.0117	0.0082	1	0	168
0.34542	1	0	0	0	1	155		0.54194	0.9819	0.0181	0.0103	0	1	163		0.41625	0.9607	0.0393	0.0222	1	0	74		0.61486	0.9824	0.0176	0.0101	1	0	167
0.35792	1	0	0	0	1	154		0.83361	0.9759	0.0241	0.0119	1	2	162		0.43917	0.9344	0.0656	0.0284	2	0	73		0.68292	0.9764	0.0236	0.0116	1	0	166
0.44125	1	0	0	0	1	153		0.86208	0.9759	0.0241	0.0119	0	2	159		0.45097	0.9212	0.0788	0.0309	1	0	71		0.69819	0.9705	0.0295	0.013	1	1	165
0.51208	0.9934	0.0066	0.0066	1	0	152		1.11208	0.9697	0.0303	0.0134	1	0	157		0.45792	0.9081	0.0919	0.0331	1	0	70		0.71139	0.9646	0.0354	0.0142	1	2	163
0.79958	0.9868	0.0132	0.0092	1	0	151		1.14611	0.9634	0.0366	0.0147	1	0	156		0.48083	0.8949	0.1051	0.0352	1	1	69		0.72458	0.9585	0.0415	0.0153	1	0	160
0.81625	0.9803	0.0197	0.0113	1	0	150		1.16694	0.9572	0.0428	0.0158	1	1	155		0.49264	0.8415	0.1585	0.042	4	0	67		0.73222	0.9525	0.0475	0.0164	1	0	159
0.85792	0.9737	0.0263	0.013	1	0	149		1.19542	0.951	0.049	0.0169	1	0	153		0.49958	0.8148	0.1852	0.0447	2	0	63		0.73986	0.9465	0.0535	0.0174	1	1	158
0.88708	0.9671	0.0329	0.0145	1	0	148		1.22944	0.9447	0.0553	0.0179	1	0	152		0.5225	0.788	0.212	0.0471	2	0	61		0.76625	0.9283	0.0717	0.02	3	0	156
0.89958	0.9474	0.0526	0.0181	3	0	147		1.37528	0.9385	0.0615	0.0189	1	0	151		0.53431	0.748	0.252	0.05	3	0	59		0.78153	0.904	0.096	0.0228	4	0	153
0.91208	0.9408	0.0592	0.0191	1	0	144		1.42458	0.9322	0.0678	0.0197	1	0	150		0.55236	0.7213	0.2787	0.0517	2	2	56		0.78708	0.8797	0.1203	0.0252	4	0	149
0.92458	0.9342	0.0658	0.0201	1	0	143		1.54194	0.9259	0.0741	0.0206	1	0	149		0.57597	0.6796	0.3204	0.054	3	1	52		0.79472	0.8737	0.1263	0.0258	1	0	145
0.94125	0.9276	0.0724	0.021	1	0	142		1.65375	0.9197	0.0803	0.0214	1	0	148		0.58292	0.6655	0.3345	0.0547	1	0	48		0.80236	0.8676	0.1324	0.0263	1	0	144
0.97042	0.9079	0.0921	0.0235	3	0	141		2.01625	0.9134	0.0866	0.0221	1	0	147		0.59403	0.6088	0.3912	0.0569	4	0	47		0.82042	0.8494	0.1506	0.0278	3	0	143
0.98292	0.8816	0.1184	0.0262	4	0	138		2.02875	0.9009	0.0991	0.0235	2	0	146		0.60583	0.5664	0.4336	0.058	3	0	43		0.82319	0.8433	0.1567	0.0282	1	0	140
1.00792	0.875	0.125	0.0268	1	0	134		2.06278	0.8947	0.1053	0.0242	1	0	144		0.61764	0.5381	0.4619	0.0584	2	0	40		0.83639	0.8373	0.1627	0.0287	1	1	139
1.01208	0.8684	0.1316	0.0274	1	0	133		2.11208	0.8884	0.1116	0.0248	1	0	143		0.63569	0.4956	0.5044	0.0587	3	1	38		0.84403	0.8189	0.1811	0.0299	3	0	137
1.02458	0.8289	0.1711	0.0305	6	0	132		2.13292	0.8821	0.1179	0.0254	1	0	142		0.6475	0.4373	0.5627	0.0586	4	1	34		0.84958	0.8006	0.1994	0.0311	3	1	134
1.03708	0.8158	0.1842	0.0314	2	0	126		2.15375	0.8759	0.1241	0.026	1	0	141		0.66625	0.392	0.608	0.0581	3	0	29		0.86208	0.7944	0.2056	0.0314	1	0	130
1.04958	0.8026	0.1974	0.0323	2	0	124		2.25028	0.8696	0.1304	0.0265	1	0	140		0.67736	0.3619	0.6381	0.0574	2	0	26		0.86486	0.7883	0.2117	0.0318	1	0	129
1.06625	0.7895	0.2105	0.0331	2	0	122		2.33778	0.8634	0.1366	0.0271	1	0	139		0.68917	0.3619	0.6381	0.0574	0	1	24		0.87806	0.7575	0.2425	0.0334	5	0	128
1.07042	0.7829	0.2171	0.0334	1	0	120		2.40375	0.8571	0.1429	0.0276	1	0	138		0.70097	0.3304	0.6696	0.0566	2	0	23		0.88292	0.7513	0.2487	0.0337	1	0	123
1.07875	0.7632	0.2368	0.0345	3	0	119		2.41694	0.8446	0.1554	0.0286	2	0	137		0.70792	0.2675	0.7325	0.0538	4	0	21		0.90375	0.7329	0.2671	0.0345	3	0	122
1.09125	0.7434	0.2566	0.0354	3	0	116		2.44542	0.8446	0.1554	0.0286	0	1	135		0.73083	0.2517	0.7483	0.0529	1	0	17		0.90653	0.7205	0.2795	0.035	2	0	119
1.10792	0.7368	0.2632	0.0357	1	0	113		2.50028	0.8383	0.1617	0.0291	1	0	134		0.74264	0.236	0.764	0.0519	1	0	16		0.91972	0.6959	0.3041	0.0359	4	0	117
1.12042	0.7303	0.2697	0.036	1	0	112		2.51625	0.832	0.168	0.0295	1	0	133		0.74958	0.2203	0.7797	0.0508	1	0	15		0.92458	0.6774	0.3226	0.0365	3	0	113
1.13292	0.7171	0.2829	0.0365	2	0	111		2.52111	0.8257	0.1743	0.0299	1	0	132		0.76069	0.2045	0.7955	0.0495	1	0	14		0.92736	0.6713	0.3287	0.0367	1	0	110
1.13708	0.7039	0.2961	0.037	2	0	109		2.52875	0.8257	0.1743	0.0299	0	1	131		0.78431	0.1888	0.8112	0.0481	1	0	13		0.93292	0.6528	0.3472	0.0372	3	0	109
1.14125	0.6974	0.3026	0.0373	1	0	107		2.57042	0.813	0.187	0.0308	2	0	130		0.79125	0.1731	0.8269	0.0466	1	0	12		0.94542	0.6466	0.3534	0.0374	1	3	106
1.14958	0.6908	0.3092	0.0375	1	0	106		2.58361	0.8066	0.1934	0.0312	1	0	128		0.80236	0.1573	0.8427	0.045	1	0	11		0.94819	0.6149	0.3851	0.0381	5	0	102
1.16208	0.6711	0.3289	0.0381	3	0	105		2.64125	0.7939	0.2061	0.032	2	0	127		0.82597	0.1416	0.8584	0.0431	1	0	10		0.95375	0.6086	0.3914	0.0383	1	0	97
1.17458	0.6579	0.3421	0.0385	2	0	102		2.66694	0.7876	0.2124	0.0324	1	0	125		0.86764	0.1259	0.8741	0.0411	1	0	9		0.96139	0.6023	0.3977	0.0384	1	1	96
1.17875	0.6513	0.3487	0.0387	1	0	100		2.68292	0.7812	0.2188	0.0327	1	0	124		0.87458	0.1101	0.8899	0.0389	1	0	8		0.96625	0.5894	0.4106	0.0386	2	0	94
1.19125	0.625	0.375	0.0393	4	0	99		2.70861	0.7685	0.2315	0.0334	2	0	123		0.88569	0.0944	0.9056	0.0364	1	0	7		0.97458	0.5766	0.4234	0.0388	2	0	92
1.20375	0.6118	0.3882	0.0395	2	1	95		2.71278	0.7558	0.2442	0.034	2	0	121		0.98083	0.0629	0.9371	0.0303	2	0	6		0.98708	0.5702	0.4298	0.0389	1	0	90
1.21625	0.6052	0.3948	0.0397	1	0	92		2.73708	0.7495	0.2505	0.0343	1	0	119		1.09403	0.0472	0.9528	0.0265	1	0	4		0.98986	0.5638	0.4362	0.039	1	2	89
1.22042	0.5919	0.4081	0.0399	2	0	91		2.76625	0.7368	0.2632	0.0349	2	0	118		1.12458	0.0315	0.9685	0.0218	1	0	3		1.00306	0.5376	0.4624	0.0393	4	0	86
1.24125	0.5852	0.4148	0.04	1	0	89		2.77875	0.7241	0.2759	0.0354	2	0	116		1.30236	0.0157	0.9843	0.0156	1	0	2		1.00792	0.5179	0.4821	0.0395	3	0	82
1.24542	0.5852	0.4148	0.04	0	1	88		2.79611	0.705	0.295	0.0362	3	0	114		1.38569	0	1	0	1	0	1		1.01069	0.5114	0.4886	0.0395	1	0	79
1.25792	0.5785	0.4215	0.0401	1	0	87		2.80792	0.6987	0.3013	0.0364	1	0	111										1.01625	0.4983	0.5017	0.0396	2	0	78
1.26208	0.5718	0.4282	0.0402	1	0	86		2.82042	0.6923	0.3077	0.0366	1	0	110										1.02875	0.4786	0.5214	0.0396	3	0	76
1.27458	0.5583	0.4417	0.0403	2	0	85		2.83361	0.6796	0.3204	0.037	2	0	109										1.03153	0.4589	0.5411	0.0396	3	0	73
1.28708	0.5516	0.4484	0.0404	1	2	83		2.84125	0.6733	0.3267	0.0372	1	0	107										1.04472	0.4327	0.5673	0.0394	4	0	70
1.30375	0.5378	0.4622	0.0406	2	0	80		2.86208	0.6733	0.3267	0.0372	0	2	106										1.04958	0.4261	0.5739	0.0394	1	0	66
1.31625	0.524	0.476	0.0407	2	0	78		2.89125	0.6668	0.3332	0.0374	1	0	104										1.05236	0.4196	0.5804	0.0393	1	0	65
1.32875	0.524	0.476	0.0407	0	1	76		2.91694	0.6603	0.3397	0.0376	1	0	103										1.05792	0.4065	0.5935	0.0392	2	2	64
1.34125	0.5101	0.4899	0.0408	2	0	75		2.92111	0.6538	0.3462	0.0378	1	0	102										1.06556	0.3997	0.6003	0.0391	1	0	60
1.34542	0.4961	0.5039	0.0408	2	0	73		2.93292	0.6409	0.3591	0.0381	2	0	101										1.07042	0.3929	0.6071	0.039	1	0	59
1.35792	0.4891	0.5109	0.0409	1	0	71		2.94542	0.6215	0.3785	0.0386	3	2	99										1.07319	0.3726	0.6274	0.0387	3	0	58
1.37042	0.4821	0.5179	0.0409	1	0	70		2.95861	0.6082	0.3918	0.0389	2	0	94										1.08639	0.3523	0.6477	0.0384	3	0	55
1.38292	0.4751	0.5249	0.0409	1	0	69		2.96278	0.595	0.405	0.0392	2	0	92										1.09125	0.3455	0.6545	0.0382	1	0	52
1.39958	0.4611	0.5389	0.0408	2	0	68		2.96625	0.5884	0.4116	0.0393	1	0	90										1.09403	0.3387	0.6613	0.0381	1	0	51
1.41208	0.4192	0.5808	0.0406	6	0	66		2.97458	0.5818	0.4182	0.0394	1	0	89										1.09958	0.3049	0.6951	0.0371	5	0	50
1.42875	0.3913	0.6087	0.0402	4	0	60		2.98708	0.5686	0.4314	0.0396	2	1	88										1.11208	0.2981	0.7019	0.0369	1	0	45
1.45375	0.3843	0.6157	0.0401	1	0	56		3.00028	0.5619	0.4381	0.0397	1	0	85										1.12806	0.2845	0.7155	0.0365	2	0	44
1.46625	0.3633	0.6367	0.0397	3	0	55		3.00444	0.5485	0.4515	0.0399	2	0	84										1.13292	0.2778	0.7222	0.0362	1	0	42
1.47042	0.3494	0.6506	0.0394	2	1	52		3.02875	0.5284	0.4716	0.04	3	0	82										1.13569	0.271	0.729	0.036	1	0	41
1.48292	0.3422	0.6578	0.0392	1	0	49		3.04194	0.5218	0.4782	0.0401	1	0	79										1.14125	0.2507	0.7493	0.0351	3	0	40
1.49542	0.328	0.672	0.0388	2	0	48		3.04611	0.5084	0.4916	0.0402	2	0	78										1.15375	0.2371	0.7629	0.0345	2	0	37
1.50792	0.3137	0.6863	0.0384	2	0	46		3.05792	0.4682	0.5318	0.0402	6	0	76										1.15653	0.2303	0.7697	0.0342	1	0	35
1.51208	0.3066	0.6934	0.0382	1	0	44		3.06278	0.4616	0.5384	0.0402	1	0	70										1.16208	0.2236	0.7764	0.0338	1	0	34
1.52458	0.2994	0.7006	0.038	1	0	43		3.08361	0.4482	0.5518	0.0401	2	0	69										1.17458	0.2168	0.7832	0.0335	1	0	33
1.53708	0.2923	0.7077	0.0377	1	0	42		3.08778	0.4348	0.5652	0.04	2	0	67										1.19542	0.2032	0.7968	0.0327	2	0	32
1.55375	0.2852	0.7148	0.0375	1	0	41		3.09958	0.4281	0.5719	0.04	1	0	65										1.19819	0.1965	0.8035	0.0323	1	0	30
1.57875	0.2781	0.7219	0.0372	1	0	40		3.10444	0.4214	0.5786	0.0399	1	0	64										1.21139	0.1761	0.8239	0.0311	3	0	29
1.59125	0.2638	0.7362	0.0367	2	0	39		3.11208	0.4147	0.5853	0.0398	1	0	63										1.22458	0.1694	0.8306	0.0306	1	0	26
1.59542	0.2567	0.7433	0.0364	1	0	37		3.12528	0.4014	0.5986	0.0396	2	0	62										1.23708	0.1558	0.8442	0.0296	2	0	25
1.60792	0.2495	0.7505	0.036	1	0	36		3.12944	0.388	0.612	0.0394	2	0	60										1.25306	0.1423	0.8577	0.0285	2	0	23
1.62042	0.2424	0.7576	0.0357	1	0	35		3.14125	0.3746	0.6254	0.0392	2	0	58										1.26625	0.1355	0.8645	0.028	1	0	21
1.66208	0.2353	0.7647	0.0354	1	0	34		3.15375	0.3545	0.6455	0.0388	3	0	56										1.28708	0.1287	0.8713	0.0274	1	0	20
1.67458	0.221	0.779	0.0346	2	0	33		3.17111	0.3411	0.6589	0.0384	2	0	53										1.29472	0.1219	0.8781	0.0268	1	0	19
1.67875	0.2139	0.7861	0.0342	1	0	31		3.18292	0.3345	0.6655	0.0383	1	0	51										1.32042	0.1152	0.8848	0.0261	1	0	18
1.69542	0.2068	0.7932	0.0338	1	0	30		3.20861	0.3211	0.6789	0.0379	2	0	50										1.32875	0.1084	0.8916	0.0254	1	0	17
1.71625	0.1996	0.8004	0.0334	1	3	29		3.21278	0.3144	0.6856	0.0377	1	0	48										1.34403	0.1016	0.8984	0.0247	1	0	16
1.72042	0.1837	0.8163	0.0326	2	0	25		3.22458	0.3077	0.6923	0.0375	1	2	47										1.34958	0.0948	0.9052	0.024	1	0	15
1.75792	0.1757	0.8243	0.0321	1	1	23		3.25444	0.3007	0.6993	0.0373	1	0	44										1.36486	0.0881	0.9119	0.0232	1	0	14
1.76208	0.1673	0.8327	0.0317	1	0	21		3.26625	0.2797	0.7203	0.0366	3	0	43										1.37042	0.0813	0.9187	0.0224	1	0	13
1.84542	0.1589	0.8411	0.0312	1	0	20		3.29611	0.2657	0.7343	0.0361	2	0	40										1.41972	0.0745	0.9255	0.0215	1	0	12
1.85792	0.1506	0.8494	0.0306	1	0	19		3.29958	0.2587	0.7413	0.0358	1	0	38										1.43292	0.061	0.939	0.0196	2	0	11
1.87042	0.1422	0.8578	0.0301	1	0	18		3.30792	0.2378	0.7622	0.0349	3	0	37										1.45375	0.0542	0.9458	0.0186	1	0	9
1.95375	0.1338	0.8662	0.0294	1	0	17		3.33778	0.2308	0.7692	0.0345	1	0	34										1.50792	0.0474	0.9526	0.0175	1	0	8
1.96625	0.1255	0.8745	0.0288	1	0	16		3.34958	0.2168	0.7832	0.0338	2	0	33										1.51625	0.0406	0.9594	0.0162	1	0	7
2.03708	0.1171	0.8829	0.028	1	0	15		3.35861	0.2098	0.7902	0.0335	1	0	31										1.53153	0.0339	0.9661	0.0149	1	0	6
2.04958	0.1004	0.8996	0.0264	2	0	14		3.37944	0.1958	0.8042	0.0327	2	0	30										1.57042	0.0271	0.9729	0.0133	1	0	5
2.14958	0.092	0.908	0.0255	1	0	12		3.40375	0.1888	0.8112	0.0322	1	0	28										1.65653	0.0135	0.9865	0.0095	2	0	4
2.17458	0.0837	0.9163	0.0245	1	0	11		3.42111	0.1678	0.8322	0.0308	3	0	27										1.73708	0.0068	0.9932	0.0067	1	0	2
2.20375	0.0753	0.9247	0.0234	1	0	10		3.44542	0.1539	0.8461	0.0298	2	0	24										1.83639	0	1	0	1	0	1
2.26208	0.0669	0.9331	0.0223	1	0	9		3.45861	0.1469	0.8531	0.0293	1	0	22
2.34125	0.0586	0.9414	0.021	1	0	8		3.47458	0.1399	0.8601	0.0287	1	0	21
2.44125	0.0502	0.9498	0.0196	1	0	7		3.51625	0.1329	0.8671	0.0281	1	0	20
2.63292	0.0418	0.9582	0.018	1	0	6		3.54194	0.1259	0.8741	0.0275	1	0	19
2.63708	0.0335	0.9665	0.0162	1	0	5		3.55792	0.1119	0.8881	0.0261	2	0	18
2.74542	0.0251	0.9749	0.0142	1	0	4		3.58361	0.1049	0.8951	0.0254	1	0	16
2.76208	0.0167	0.9833	0.0117	1	0	3		3.62944	0.0979	0.9021	0.0247	1	0	15
2.84125	0.0084	0.9916	0.0083	1	0	2		3.68292	0.0909	0.9091	0.0239	1	0	14
2.96625	0	1	0	1	0	1		3.70861	0.0839	0.9161	0.023	1	0	13
								3.75444	0.0769	0.9231	0.0222	1	0	12
								3.79611	0.0629	0.9371	0.0202	2	0	11
								3.83361	0.0559	0.9441	0.0191	1	0	9
								3.84958	0.049	0.951	0.018	1	0	8
								3.92111	0.042	0.958	0.0167	1	0	7
								3.96278	0.035	0.965	0.0153	1	0	6
								4.00444	0.014	0.986	0.0098	3	0	5
								4.01625	0.007	0.993	0.007	1	0	2
								4.08361	0	1	0	1	0	1
