# Supplementary material for: Neuronal temperature perception induces specific defenses that enable C. elegans to cope with the enhanced reactivity of hydrogen peroxide at high temperature
Source: eLife. 2022 Oct 13;11:e78941. doi: 10.7554/eLife.78941 (PMC9635881; doi:10.7554/eLife.78941)
Supplement: Figure 8—figure supplement 2—source data 1. [file elife-78941-fig8-figsupp2-data1.xlsx]

## Sheet: Figure 8S2
Figure 8S2
WormCat level 1	WormCat level 3	n genes	Mean(daf-16(-) effect_log2foldchange)	Mean(AFD(-) effect_log2foldchange)	Mean(AFD(-) daf16(-) interaction effect_log2foldfhange)	Mean(AFD(-) effect + AFD(-) daf16(-) interaction effect_log2foldchange)
		20	-0.0288748	0.369455	-0.195085	0.17437
Cell cycle	Cell cycle: APC	13	0.0986584	-1.15255	0.48755	-0.664998
Cell cycle	Cell cycle: chromosome dynamics: CENP	3	0.12203	-2.26384	0.974456	-1.28938
Cell cycle	Cell cycle: chromosome dynamics: condensin	5	0.0638272	-1.30189	0.727477	-0.574414
Cell cycle	Cell cycle: chromosome dynamics: kinase	2	-0.0322573	-1.91821	0.83713	-1.08108
Cell cycle	Cell cycle: chromosome dynamics: kinetochore protein	7	0.16197	-2.0435	0.858893	-1.1846
Cell cycle	Cell cycle: chromosome dynamics: meiotic functions	20	0.0457731	-1.71385	1.00893	-0.704916
Cell cycle	Cell cycle: chromosome dynamics: SMC	5	0.0350829	-1.4102	0.650502	-0.759697
Cell cycle	Cell cycle: chromosome dynamics: unassigned	9	0.0593937	-1.33615	0.528792	-0.80736
Cell cycle	Cell cycle: cyclin	9	0.0917794	-1.90545	0.806475	-1.09897
Cell cycle	Cell cycle: kinase	12	0.101259	-1.77764	0.921663	-0.85598
Cell cycle	Cell cycle: meiotic/mitotic spindle	21	0.035696	-1.42037	0.644295	-0.776073
Cell cycle	Cell cycle: phosphatase	2	-0.0333909	-1.7023	0.774225	-0.928079
Cell cycle	Cell cycle: transcriptional regulator	3	0.0323826	-1.57647	0.83664	-0.739828
Cell cycle	Cell cycle: unassigned	16	0.112228	-1.13612	0.466858	-0.669264
Chaperone	Chaperone: cyclophilin	21	0.062674	-0.142206	-0.0106115	-0.152817
Chaperone	Chaperone: DnaJ domain	23	0.0452579	-0.737396	0.210159	-0.527237
Chaperone	Chaperone: HSP	4	-0.0931021	0.419673	0.123516	0.54319
Chaperone	Chaperone: prefoldin	6	0.213238	-0.527449	-0.0776171	-0.605066
Chaperone	Chaperone: T complex	8	0.245643	-0.522806	0.000688686	-0.522117
Chaperone	Chaperone: unassigned	11	0.0944391	0.00979492	-0.0234675	-0.0136726
Cilia	Cilia: IFT-A	1	-0.603022	0.912428	0.0636278	0.976055
Cilia	Cilia: IFT-B	1	-0.292049	0.217939	0.837098	1.05504
Cilia	Cilia: IFT-motor	2	-0.372154	0.251923	0.447555	0.699478
Cilia	Cilia: unassigned	3	-0.0560375	-0.270324	-0.0306753	-0.300999
Cytoskeleton	Cytoskeleton: actin function: actin	17	0.0353417	-0.0817169	-0.113483	-0.1952
Cytoskeleton	Cytoskeleton: actin function: binding	18	-0.11566	0.28328	-0.0644763	0.218804
Cytoskeleton	Cytoskeleton: cadherin	4	-0.436771	-0.431579	0.33829	-0.0932887
Cytoskeleton	Cytoskeleton: centrosome: centriole	5	0.0612789	-1.26628	0.456487	-0.809794
Cytoskeleton	Cytoskeleton: centrosome: kinase	2	0.215213	-1.53586	0.47663	-1.05923
Cytoskeleton	Cytoskeleton: centrosome: unassigned	3	0.184716	-1.33849	0.470978	-0.867513
Cytoskeleton	Cytoskeleton: claudin	3	-0.311143	1.39421	-0.933906	0.460304
Cytoskeleton	Cytoskeleton: innexin	13	-0.0927274	0.0865603	0.214128	0.300689
Cytoskeleton	Cytoskeleton: integrin	3	-0.21148	0.726866	-0.152101	0.574765
Cytoskeleton	Cytoskeleton: intermediate filament protein	8	-0.169613	1.59114	-0.611429	0.97971
Cytoskeleton	Cytoskeleton: microtubule: binding	6	-0.0306399	-0.704668	0.2687	-0.435968
Cytoskeleton	Cytoskeleton: microtubule: RMDN	3	0.0224936	0.200355	-0.106219	0.0941361
Cytoskeleton	Cytoskeleton: microtubule: tau tubulin kinase	3	-0.164354	1.03749	-0.254457	0.783033
Cytoskeleton	Cytoskeleton: microtubule: tubulin	9	0.143637	-0.195179	-0.324943	-0.520122
Cytoskeleton	Cytoskeleton: microtubule: tubulin modification	12	-0.0303689	-0.299909	0.294064	-0.00584485
Cytoskeleton	Cytoskeleton: microtubule: unassigned	4	0.144844	-0.474034	-0.0287642	-0.502799
Cytoskeleton	Cytoskeleton: motor protein: dynein	14	0.0218765	-0.224086	-0.0927404	-0.316827
Cytoskeleton	Cytoskeleton: motor protein: kinesin	13	0.00196887	-1.02154	0.617694	-0.403842
Cytoskeleton	Cytoskeleton: motor protein: unassigned	1	-0.348201	1.0007	-0.826477	0.174225
Cytoskeleton	Cytoskeleton: paxillin	1	-0.272015	1.65909	-1.51594	0.143159
Cytoskeleton	Cytoskeleton: unassigned	50	-0.155199	0.555266	-0.0636038	0.491663
Development	Development: apoptosis	44	-0.0154259	-0.166859	0.173752	0.00689364
Development	Development: general	61	-0.0277041	-0.244	0.181255	-0.0627443
Development	Development: germline	10	0.0931105	-1.55262	0.665551	-0.887065
Development	Development: sex determination	4	-0.0353678	-0.614693	0.30054	-0.314153
Development	Development: somatic	79	-0.0431861	-0.562122	0.424915	-0.137207
DNA	DNA: helicase	6	-0.228699	-0.241603	0.738694	0.497091
DNA	DNA: nuclease	11	0.0173752	-0.219741	0.148432	-0.0713091
DNA	DNA: repair	53	0.013024	-1.1701	0.595623	-0.574477
DNA	DNA: replication	60	0.078375	-1.64206	0.738292	-0.903772
DNA	DNA: telomere	8	-0.0241993	-0.710616	0.214753	-0.495863
DNA	DNA: transposon function	3	0.0358665	-2.39642	1.32118	-1.07524
Extracellular material	Extracellular material: chitinase	3	-0.191229	2.02538	-0.469067	1.55631
Extracellular material	Extracellular material: collagen	37	0.0618722	1.31674	-1.07333	0.243412
Extracellular material	Extracellular material: galectin	10	-0.0919613	1.34601	-0.505293	0.840722
Extracellular material	Extracellular material: lectin	3	-0.062741	0.983383	-0.752505	0.230877
Extracellular material	Extracellular material: matrix	38	-0.127277	0.865488	-0.229792	0.635697
Extracellular material	Extracellular material: mucin	1	0.0808536	-1.16934	0.884463	-0.284878
Extracellular material	Extracellular material: PGI	24	-0.0797864	0.0937829	0.0499897	0.143773
Extracellular material	Extracellular material: secreted protein	23	-0.0965319	0.222514	-0.0369739	0.18554
Extracellular material	Extracellular material: unassigned	1	-0.862805	0.394393	0.18106	0.575453
Globin	Globin	1	-0.00113344	2.35254	-0.711289	1.64125
Lysosome	Lysosome: acid phosphatase	15	-0.125797	1.75892	-0.445296	1.31362
Lysosome	Lysosome: autophagy	20	-0.0836647	-0.0880267	0.166627	0.0786005
Lysosome	Lysosome: unassigned	10	-0.0767642	0.332192	-0.058954	0.273238
Lysosome	Lysosome: Vacuolar ATPase	22	0.0283778	0.600729	-0.45227	0.148459
Metabolism	Metabolism: 1CC: folate	9	-0.025628	0.00692376	0.125051	0.131975
Metabolism	Metabolism: 1CC: methionine	4	0.0917327	-0.139895	-0.287218	-0.427113
Metabolism	Metabolism: 1CC: transsulfuration	7	-0.0616748	1.27958	-0.490419	0.789161
Metabolism	Metabolism: 1CC: unassigned	2	0.00747956	0.0209639	0.00110956	0.0220735
Metabolism	Metabolism: amino acid: breakdown	27	-0.0216723	1.15073	-0.533618	0.617112
Metabolism	Metabolism: amino acid: synthesis	28	-0.0281746	0.744142	-0.331615	0.412528
Metabolism	Metabolism: amino acid: unassigned	5	-0.104481	1.26295	0.0108027	1.27376
Metabolism	Metabolism: amino sugar	10	0.0622489	-0.777427	0.101134	-0.676294
Metabolism	Metabolism: B6	2	-0.0679986	0.827005	-0.177546	0.649459
Metabolism	Metabolism: B12	5	0.0239491	-0.626091	0.17801	-0.448081
Metabolism	Metabolism: carbohydrate	53	-0.053693	0.405552	-0.0594339	0.346118
Metabolism	Metabolism: carbonic anhydrase	4	0.127602	2.16529	-1.22106	0.944231
Metabolism	Metabolism: creatine kinase	3	0.149665	0.818298	-0.805872	0.012426
Metabolism	Metabolism: FMO	3	-0.180149	2.13099	-0.504987	1.626
Metabolism	Metabolism: glutathione	13	-0.125773	0.91905	-0.246982	0.672068
Metabolism	Metabolism: glycolysis	33	0.0458496	0.349857	-0.290312	0.0595454
Metabolism	Metabolism: insulin	2	-0.354252	0.103477	0.0774682	0.180945
Metabolism	Metabolism: lipid: beta oxidation	53	-0.0990375	1.36206	-0.268783	1.09328
Metabolism	Metabolism: lipid: binding	52	0.017608	0.806649	-0.135622	0.671027
Metabolism	Metabolism: lipid: CoA	8	-0.0382047	-0.374523	0.178992	-0.19553
Metabolism	Metabolism: lipid: epoxide hydrolase	3	-0.23087	2.27907	-0.628925	1.65014
Metabolism	Metabolism: lipid: fatty acid	45	0.0112659	1.05194	-0.324677	0.727268
Metabolism	Metabolism: lipid: glycerolipid	24	-0.147171	0.575682	-0.0136379	0.562044
Metabolism	Metabolism: lipid: lipase	6	-0.0569586	1.0284	0.0873819	1.11578
Metabolism	Metabolism: lipid: o-acyl transferase	8	-0.332885	2.24254	-0.427775	1.81476
Metabolism	Metabolism: lipid: phospholipid	36	-0.0865865	0.804006	-0.150421	0.653585
Metabolism	Metabolism: lipid: sphingolipid	32	-0.165574	1.24446	-0.2932	0.951264
Metabolism	Metabolism: lipid: sterol	27	-0.0933315	1.58546	-0.510279	1.07518
Metabolism	Metabolism: lipid: transcriptional regulator	2	-0.133532	0.536124	-0.430452	0.105672
Metabolism	Metabolism: lipid: unassigned	20	-0.0432869	0.488199	-0.104679	0.38352
Metabolism	Metabolism: mitochondria: chaperone	3	0.136412	-0.873915	0.339699	-0.534216
Metabolism	Metabolism: mitochondria: citric acid cycle	22	0.108273	0.405864	-0.474028	-0.0681641
Metabolism	Metabolism: mitochondria: complex I	44	0.0950745	0.311411	-0.29394	0.0174706
Metabolism	Metabolism: mitochondria: complex III	13	0.146624	0.857047	-0.650287	0.206761
Metabolism	Metabolism: mitochondria: complex IV	12	0.116332	0.532826	-0.486138	0.046688
Metabolism	Metabolism: mitochondria: complex V	17	0.13716	0.748369	-0.681523	0.0668458
Metabolism	Metabolism: mitochondria: cytochrome c oxidase assembly factor	8	-0.0800993	-0.100768	-0.0723542	-0.173123
Metabolism	Metabolism: mitochondria: gene expression	10	-0.0794329	-0.6677	0.342686	-0.325013
Metabolism	Metabolism: mitochondria: iron sulfur assembly	3	-0.100862	-0.767034	0.455165	-0.31187
Metabolism	Metabolism: mitochondria: morphology	2	0.0600677	-0.0730879	-0.167319	-0.240406
Metabolism	Metabolism: mitochondria: protease	6	-0.0630473	-0.174395	0.229818	0.0554231
Metabolism	Metabolism: mitochondria: ribosome	68	0.0322943	-0.605278	0.165541	-0.439737
Metabolism	Metabolism: mitochondria: RNA methyltransferase	2	0.070356	-0.919094	0.102859	-0.816235
Metabolism	Metabolism: mitochondria: translocase	17	-0.00731042	-0.487897	0.176804	-0.311093
Metabolism	Metabolism: mitochondria: transporter	11	-0.0161326	-0.133257	0.132319	-0.00093775
Metabolism	Metabolism: mitochondria: ubiquinone	8	-0.0171976	0.00544958	-0.142282	-0.136833
Metabolism	Metabolism: mitochondria: unassigned	55	0.0353356	0.0176586	-0.0587556	-0.0410969
Metabolism	Metabolism: molybdenum cofactor	6	-0.127741	0.548974	-0.103757	0.445217
Metabolism	Metabolism: nicotinate and nicotinamide metabolism	4	-0.0467994	-1.08112	0.472654	-0.608463
Metabolism	Metabolism: nucleotide	81	0.00525484	0.0832039	-0.0434018	0.0398021
Metabolism	Metabolism: pentose phosphate pathway	11	0.0758058	0.00917284	-0.276324	-0.267151
Metabolism	Metabolism: polyamine	6	-0.0210203	0.882526	-0.488971	0.393555
Metabolism	Metabolism: short chain dehydrogenase	30	-0.151972	1.69819	-0.335675	1.36251
Metabolism	Metabolism: unassigned	109	-0.0516669	0.547093	-0.226633	0.32046
mRNA functions	mRNA functions: binding: KH	13	-0.0279953	-0.62931	0.348862	-0.280447
mRNA functions	mRNA functions: binding: PUF	12	0.0231094	-1.20566	0.865216	-0.340447
mRNA functions	mRNA functions: binding: RBM	29	0.0932404	-0.797387	0.364927	-0.43246
mRNA functions	mRNA functions: binding: unassigned	19	0.0762689	-0.911989	0.390609	-0.521381
mRNA functions	mRNA functions: binding: ZF	15	0.0957597	-1.86166	0.99245	-0.869207
mRNA functions	mRNA functions: methylation: cap	4	0.0713049	-0.864951	0.400208	-0.464743
mRNA functions	mRNA functions: methylation: unassigned	4	0.0443383	-0.343531	-0.0731459	-0.416677
mRNA functions	mRNA functions: processing: cap	4	0.144252	-0.296812	-0.00555656	-0.302369
mRNA functions	mRNA functions: processing: cold shock	4	0.160958	-0.716565	0.164425	-0.55214
mRNA functions	mRNA functions: processing: decapping	8	0.181485	-1.5191	0.621773	-0.897329
mRNA functions	mRNA functions: processing: export	8	0.0525176	-0.784214	0.0801602	-0.704053
mRNA functions	mRNA functions: processing: helicase	42	0.00564932	-0.588613	0.187309	-0.401304
mRNA functions	mRNA functions: processing: hnRNP	7	0.161724	-0.64488	0.0648429	-0.580037
mRNA functions	mRNA functions: processing: LSM	9	0.113448	-0.65612	0.166504	-0.489616
mRNA functions	mRNA functions: processing: NMD	9	0.0312151	-0.952762	0.212388	-0.740373
mRNA functions	mRNA functions: processing: nuclease	28	-0.0138013	-0.182275	0.196012	0.0137374
mRNA functions	mRNA functions: processing: poly U polymerase	2	0.0110665	-1.1917	0.609279	-0.582425
mRNA functions	mRNA functions: processing: polyadenylation	20	0.0205811	-0.805805	0.299044	-0.506761
mRNA functions	mRNA functions: processing: RNA exosome	6	0.046559	-0.90914	0.290362	-0.618778
mRNA functions	mRNA functions: processing: snRNP	35	0.138354	-0.891835	0.293567	-0.598268
mRNA functions	mRNA functions: processing: splicing	62	0.0889157	-1.08456	0.376791	-0.707769
mRNA functions	mRNA functions: processing: unassigned	9	-0.0696209	-0.416564	0.281072	-0.135492
Muscle function	Muscle function	53	-0.152429	0.95776	-0.464226	0.493534
Neuronal function	Neuronal function: development	7	0.0348205	-0.869691	0.473354	-0.396337
Neuronal function	Neuronal function: synaptic function: neuropeptide	37	-0.162795	1.33997	-0.418927	0.921048
Neuronal function	Neuronal function: synaptic function: neurotransmitter metabolism	11	-0.147339	1.35952	-0.197758	1.16176
Neuronal function	Neuronal function: synaptic function: neurotransmitter receptor	3	-0.280425	1.64546	-0.0381794	1.60728
Neuronal function	Neuronal function: synaptic function: unassigned	11	-0.157508	0.753648	-0.217717	0.535931
Neuronal function	Neuronal function: synaptic function: vesicle trafficking	10	-0.220842	0.536278	0.198919	0.735197
Neuronal function	Neuronal function: transcription factor	1	-0.219621	-1.29821	0.550869	-0.747341
Neuronal function	Neuronal function: unassigned	13	-0.3461	0.849763	0.0838494	0.933613
Non-coding RNA	Non-coding RNA: linc	5	-0.0620338	1.39643	-0.532522	0.863908
Non-coding RNA	Non-coding RNA: ncRNA	14	0.05071	1.01538	-0.601765	0.413612
Non-coding RNA	Non-coding RNA: processing	2	0.0831167	-0.33672	0.000547073	-0.336172
Non-coding RNA	Non-coding RNA: small RNA: argonaute	16	-0.027912	-0.929454	0.504713	-0.424741
Non-coding RNA	Non-coding RNA: small RNA: RNA polymerase	4	-0.260236	-0.606482	0.755909	0.149426
Non-coding RNA	Non-coding RNA: small RNA: unassigned	23	0.0373474	-0.741249	0.352218	-0.389031
Non-coding RNA	Non-coding RNA: snoRNA	1	1.41072	2.17447	-2.74863	-0.574152
Non-coding RNA	Non-coding RNA: tRNA: methylation	9	0.0523149	-0.562277	0.0375689	-0.524708
Non-coding RNA	Non-coding RNA: tRNA: production	54	0.0283318	-0.405486	0.189967	-0.215519
Nuclear pore	Nuclear pore: structure	27	0.119646	-1.18522	0.359644	-0.825572
Nuclear pore	Nuclear pore: transport	8	0.188113	-1.66338	0.535408	-1.12798
Nucleic acid	Nucleic acid: binding: unassigned	53	-0.00428447	-0.504916	0.173718	-0.331198
Nucleic acid	Nucleic acid: binding: zinc finger	62	0.00627417	-0.633557	0.346021	-0.287536
Nucleic acid	Nucleic acid: helicase	1	0.361199	-2.42855	0.95615	-1.4724
Peroxisome	Peroxisome: biogenesis	6	-0.108538	0.603496	-0.206455	0.39704
Peroxisome	Peroxisome: transporter	5	0.0154177	1.51551	-0.637962	0.877548
Peroxisome	Peroxisome: unassigned	1	0.43128	1.76897	-0.551077	1.2179
Protein modification	Protein modification: acetyltransferase	11	0.0600584	-0.596359	0.17035	-0.426009
Protein modification	Protein modification: acyltransferase	1	0.188799	-1.14706	0.398284	-0.748779
Protein modification	Protein modification: carbohydrate	36	-0.0954121	0.161548	0.149125	0.310673
Protein modification	Protein modification: deacylase	3	0.0316088	-0.400477	0.374812	-0.0256652
Protein modification	Protein modification: lipidation	12	0.0170423	-0.294069	-0.188874	-0.482943
Protein modification	Protein modification: methyltransferase	39	-0.0265947	-0.566005	0.311457	-0.254547
Protein modification	Protein modification: SUMO	11	0.0209939	-1.14598	0.576682	-0.569299
Protein modification	Protein modification: unassigned	10	0.0172354	0.175943	-0.108527	0.0674154
Proteolysis general	Proteolysis general: aspartate: cathepsin	12	-0.0557646	2.90052	-0.705523	2.19499
Proteolysis general	Proteolysis general: aspartate: unassigned	11	0.0498493	1.19509	-0.546778	0.648312
Proteolysis general	Proteolysis general: carboxypeptidase	9	-0.257628	1.89216	-0.610628	1.28153
Proteolysis general	Proteolysis general: cysteine: calpain	5	0.0174729	0.16193	-0.275451	-0.113521
Proteolysis general	Proteolysis general: cysteine: cathepsin	9	-0.00597054	2.49263	-0.444999	2.04763
Proteolysis general	Proteolysis general: cysteine: unassigned	4	0.010992	2.97868	-0.815463	2.16322
Proteolysis general	Proteolysis general: inhibitor: cysteine	2	-0.121253	1.64084	-0.388301	1.25254
Proteolysis general	Proteolysis general: inhibitor: serine	9	-0.145366	1.508	-0.478211	1.02979
Proteolysis general	Proteolysis general: inhibitor: TIL domain	10	0.0954219	1.6011	-0.679195	0.921908
Proteolysis general	Proteolysis general: inhibitor: unassigned	3	-0.443306	1.10973	0.183101	1.29283
Proteolysis general	Proteolysis general: lysozyme	5	-0.235725	2.82299	-0.282715	2.54027
Proteolysis general	Proteolysis general: metallopeptidase	33	-0.212459	1.0023	-0.036161	0.966142
Proteolysis general	Proteolysis general: serine	17	-0.132092	1.08343	-0.360468	0.722966
Proteolysis general	Proteolysis general: signal	2	0.240397	0.218478	-0.407075	-0.188597
Proteolysis general	Proteolysis general: unassigned	34	-0.123154	0.340951	-0.105318	0.235633
Proteolysis proteasome	Proteolysis proteasome: 19S	24	0.144745	-0.875822	0.218511	-0.657311
Proteolysis proteasome	Proteolysis proteasome: 20S	13	0.234251	-0.477522	-0.176477	-0.653999
Proteolysis proteasome	Proteolysis proteasome: E1	1	0.307853	-0.601361	0.0317843	-0.569576
Proteolysis proteasome	Proteolysis proteasome: E1 like	1	-0.0141378	-1.2617	0.611068	-0.650633
Proteolysis proteasome	Proteolysis proteasome: E2	11	0.116844	-0.547986	0.148342	-0.399644
Proteolysis proteasome	Proteolysis proteasome: E3: F box	47	-0.0904315	0.275066	-0.0402018	0.234864
Proteolysis proteasome	Proteolysis proteasome: E3: HECT	2	-0.0345022	0.0809455	-0.126814	-0.0458682
Proteolysis proteasome	Proteolysis proteasome: E3: RING finger	36	-0.0219958	-0.435555	0.282641	-0.152915
Proteolysis proteasome	Proteolysis proteasome: E3: SCF	15	-0.00740498	-0.367165	0.240806	-0.126358
Proteolysis proteasome	Proteolysis proteasome: E3: unassigned	36	-0.046812	-0.365539	0.217534	-0.148005
Proteolysis proteasome	Proteolysis proteasome: ERAD	3	-0.00186072	-0.464792	-0.141183	-0.605975
Proteolysis proteasome	Proteolysis proteasome: NEDD	10	0.0736796	-0.645147	0.359583	-0.285564
Proteolysis proteasome	Proteolysis proteasome: ubiquitin	3	0.166963	-0.253651	-0.224161	-0.477812
Proteolysis proteasome	Proteolysis proteasome: ubiquitin domain	4	0.149025	-0.0659078	-0.49932	-0.565227
Proteolysis proteasome	Proteolysis proteasome: ubiquitin hydrolase	2	-0.0718875	-0.656115	0.296615	-0.3595
Proteolysis proteasome	Proteolysis proteasome: ubiquitin peptidase	23	-0.0273469	-0.767208	0.249255	-0.517953
Proteolysis proteasome	Proteolysis proteasome: unassigned	18	0.088352	-0.944915	0.221883	-0.723032
Pseudogene	Pseudogene	39	-0.13242	0.587909	-0.0147205	0.573189
Ribosome	Ribosome: biogenesis	52	0.00217355	-0.42253	0.194608	-0.227921
Ribosome	Ribosome: EIF	54	0.0864439	-0.0022447	-0.119653	-0.121898
Ribosome	Ribosome: elongation	2	0.0883327	-0.750921	0.286934	-0.463987
Ribosome	Ribosome: S6 kinase	5	-0.229946	-0.375109	0.484567	0.109459
Ribosome	Ribosome: signal recognition	4	0.247158	-0.656605	0.353995	-0.30261
Ribosome	Ribosome: subunit	89	0.158915	0.640119	-0.738764	-0.0986447
Ribosome	Ribosome: unassigned	10	-0.00293333	-0.453143	0.0896747	-0.363469
Signaling	Signaling: AKT	2	0.0803819	-1.17629	0.399908	-0.776377
Signaling	Signaling: AMPK	6	-0.156774	1.03581	-0.150647	0.885161
Signaling	Signaling: calcium: calmodulin	5	-0.0770164	0.864923	-0.12693	0.737992
Signaling	Signaling: calcium: calmodulin dependent	2	-0.367676	0.616611	0.0866162	0.703228
Signaling	Signaling: calcium: EF hand	6	-0.020126	0.885722	-0.109498	0.776224
Signaling	Signaling: calcium: unassigned	3	-0.0150054	0.74135	-0.208799	0.532552
Signaling	Signaling: cAMP	2	-0.451352	1.43829	-0.10592	1.33237
Signaling	Signaling: casein kinase	4	0.0175625	0.150287	-0.372987	-0.222699
Signaling	Signaling: caveolin	2	-0.249164	-0.627461	1.24297	0.615509
Signaling	Signaling: CDK-like	2	-0.0714606	-0.108009	-0.296764	-0.404773
Signaling	Signaling: dual specificity	3	-0.0370566	0.495827	-0.136513	0.359314
Signaling	Signaling: FERM	9	-0.159039	0.448289	-0.228508	0.219781
Signaling	Signaling: FGF	2	-0.637988	0.82136	0.14303	0.964391
Signaling	Signaling: frizzled	2	-0.304451	0.294779	0.197518	0.492297
Signaling	Signaling: hedgehog-like	20	-0.232656	0.960987	0.066031	1.02702
Signaling	Signaling: heteromeric G protein: adenylyl cyclase	3	-0.274573	0.0116949	0.36522	0.376915
Signaling	Signaling: heteromeric G protein: arrestin	7	-0.0361365	0.493378	0.120301	0.613679
Signaling	Signaling: heteromeric G protein: G alpha subunit	4	-0.116504	0.804414	-0.102798	0.701616
Signaling	Signaling: heteromeric G protein: G beta subunit	2	-0.364902	1.05212	0.170113	1.22223
Signaling	Signaling: heteromeric G protein: G gamma subunit	1	0.148787	0.180577	-0.412562	-0.231985
Signaling	Signaling: heteromeric G protein: guanylyl cyclase	6	-0.125818	0.878356	-0.0828149	0.795542
Signaling	Signaling: heteromeric G protein: receptor	8	-0.257366	1.26564	-0.400496	0.865142
Signaling	Signaling: heteromeric G protein: unassigned	8	-0.0376506	0.244364	0.171495	0.415859
Signaling	Signaling: hippo	5	0.102975	0.498175	-0.349002	0.149174
Signaling	Signaling: lipid: kinase DAG	2	-0.173281	-0.32435	0.315823	-0.00852726
Signaling	Signaling: lipid: kinase inositol	4	-0.0847105	-0.242863	0.178303	-0.0645592
Signaling	Signaling: lipid: kinase PI3	5	-0.118839	-0.249657	0.129028	-0.120629
Signaling	Signaling: lipid: kinase PI4	5	-0.210775	-0.0450916	0.182062	0.136971
Signaling	Signaling: lipid: phosphatase	12	-0.11227	-0.380777	0.202168	-0.17861
Signaling	Signaling: lipid: phospholipase A	10	0.112824	0.189725	-0.212212	-0.0224868
Signaling	Signaling: lipid: phospholipase B	7	-0.0655734	0.964031	-0.450484	0.513547
Signaling	Signaling: lipid: phospholipase C	5	-0.316062	1.05158	-0.22815	0.823429
Signaling	Signaling: lipid: phospholipase D	4	-0.136611	0.370999	0.569023	0.940022
Signaling	Signaling: lipid: phospholipase patatin	2	-0.0507139	-0.194253	-0.413499	-0.607752
Signaling	Signaling: lipid: phospholipase: unassigned	7	-0.0309675	0.076622	-0.0741979	0.00242409
Signaling	Signaling: lipid: unassigned	7	-0.0386752	-0.412523	0.491312	0.0787894
Signaling	Signaling: MAGUK	3	-0.0845591	0.0585373	0.396495	0.455033
Signaling	Signaling: MAPK	15	-0.0205327	1.01121	-0.216178	0.795033
Signaling	Signaling: Notch	7	-0.032156	-1.58815	0.898063	-0.690089
Signaling	Signaling: phosphatase: dual specificity	3	-0.0872872	-0.351306	0.28552	-0.0657863
Signaling	Signaling: phosphatase: MAPK	1	0.0360264	-1.50462	0.990407	-0.514216
Signaling	Signaling: phosphatase: unassigned	43	-0.00789681	-0.558108	0.309653	-0.248455
Signaling	Signaling: phosphatase: Y	16	-0.152924	-0.27568	0.47718	0.2015
Signaling	Signaling: PKC	4	-0.227307	0.265821	0.454199	0.720019
Signaling	Signaling: PKD	2	-0.199155	0.183138	0.684966	0.868104
Signaling	Signaling: rhomboid	3	0.0812849	-0.316522	-0.198054	-0.514576
Signaling	Signaling: S/T kinase	36	-0.0845569	-0.0358899	0.14203	0.10614
Signaling	Signaling: SH domain	10	-0.135896	0.303351	-0.124324	0.179027
Signaling	Signaling: small GTPase: ARF	13	-0.0306724	-0.325035	0.0851692	-0.239865
Signaling	Signaling: small GTPase: Rab	23	0.0488316	-0.202524	0.0161738	-0.18635
Signaling	Signaling: small GTPase: Raf	1	-0.132993	-0.95281	0.320142	-0.632668
Signaling	Signaling: small GTPase: Ran	4	0.0671153	-1.23637	0.522487	-0.71388
Signaling	Signaling: small GTPase: Rap	3	-0.343265	0.464912	0.202848	0.66776
Signaling	Signaling: small GTPase: Ras	27	-0.0704446	0.295806	-0.00906002	0.286746
Signaling	Signaling: small GTPase: Rheb	1	-0.216626	-0.025906	0.130172	0.104266
Signaling	Signaling: small GTPase: Rho/Rac	29	-0.160338	0.256664	0.114825	0.371489
Signaling	Signaling: small GTPase: unassigned	30	-0.03239	-0.299313	0.0814456	-0.217867
Signaling	Signaling: TGF beta	11	-0.182138	1.15202	-0.250166	0.90185
Signaling	Signaling: TOR	6	-0.0265663	-0.655603	0.249563	-0.406041
Signaling	Signaling: unassigned	41	-0.0608214	0.0253251	0.146031	0.171356
Signaling	Signaling: VEGF	1	0.202921	2.07362	-0.489682	1.58394
Signaling	Signaling: WNT	19	-0.0145218	-0.636889	0.204028	-0.432861
Signaling	Signaling: Y kinase	14	-0.338674	0.933674	-0.130433	0.803242
Stress response	Stress response: C-type Lectin	46	-0.0752913	1.8966	-0.526489	1.37011
Stress response	Stress response: dauer	6	-0.23137	0.449508	-0.111877	0.33763
Stress response	Stress response: detoxification: CYP	31	-0.212004	2.01765	-0.413159	1.60449
Stress response	Stress response: detoxification: GST	20	0.0210854	1.30551	-0.674493	0.631018
Stress response	Stress response: detoxification: ugt	32	-0.157052	2.11767	-0.530517	1.58715
Stress response	Stress response: detoxification: unassigned	1	-0.538585	2.05955	0.133181	2.19273
Stress response	Stress response: ER	12	0.0401028	0.361742	-0.124146	0.237596
Stress response	Stress response: heat	15	0.012094	-0.281525	0.161104	-0.120422
Stress response	Stress response: heavy metal	8	-0.147035	1.61857	-0.115224	1.50335
Stress response	Stress response: osmotic	2	0.275252	1.01192	-0.0678434	0.94408
Stress response	Stress response: oxidative	15	0.024933	0.78826	-0.327127	0.461133
Stress response	Stress response: pathogen: ASABF	2	-0.246328	0.382014	0.140057	0.52207
Stress response	Stress response: pathogen: caenacin	4	0.311801	2.23127	0.305416	2.53669
Stress response	Stress response: pathogen: CUB	17	0.115548	2.68906	-1.01015	1.67891
Stress response	Stress response: pathogen: CYP	1	-0.268304	1.17378	-0.120562	1.05322
Stress response	Stress response: pathogen: lectin	1	0.330092	2.21702	-0.802983	1.41404
Stress response	Stress response: pathogen: lipid	2	-0.267415	1.86981	-0.0603072	1.80951
Stress response	Stress response: pathogen: lysozyme	3	-0.0931565	2.24001	-0.560074	1.67994
Stress response	Stress response: pathogen: NLP	2	-0.0232011	1.81608	0.525641	2.34172
Stress response	Stress response: pathogen: saposin	11	0.0578516	2.16231	-0.744846	1.41747
Stress response	Stress response: pathogen: ShK	3	0.486391	2.4254	-1.24463	1.18076
Stress response	Stress response: pathogen: signaling	7	-0.150157	0.869941	-0.185789	0.684151
Stress response	Stress response: pathogen: transcriptional regulator	1	0.00124324	1.23097	-0.849853	0.381116
Stress response	Stress response: pathogen: unassigned	66	-0.109895	1.54607	-0.401493	1.14458
Stress response	Stress response: signaling	2	-0.237607	1.66779	-0.299612	1.36818
Stress response	Stress response: thioredoxin	11	-0.0379818	-0.2047	0.101003	-0.103697
Stress response	Stress response: transcriptional regulator	2	-0.433756	0.360842	-0.04677	0.314072
Stress response	Stress response: unassigned	27	-0.00336664	0.846838	-0.236003	0.610835
Trafficking	Trafficking: endocytosis: adaptin	7	-0.0684874	0.12446	-0.0884786	0.0359815
Trafficking	Trafficking: endocytosis: clathrin	6	-0.0225738	-0.17895	0.184651	0.00570185
Trafficking	Trafficking: endocytosis: unassigned	14	-0.0946451	0.760409	-0.202076	0.558333
Trafficking	Trafficking: ER/Golgi: ARF	8	-0.0710779	0.161416	0.0147404	0.176156
Trafficking	Trafficking: ER/Golgi: COP I	10	0.0370717	-0.0306351	-0.13046	-0.161095
Trafficking	Trafficking: ER/Golgi: COP II	10	0.0725155	-0.298665	0.133479	-0.165187
Trafficking	Trafficking: ER/Golgi: ER unassigned	4	0.0309962	-0.0584577	0.0414826	-0.0169751
Trafficking	Trafficking: ER/Golgi: ERGIC	3	0.131208	0.275984	0.054472	0.330456
Trafficking	Trafficking: ER/Golgi: Golgi unassigned	18	0.0179858	-0.566948	0.318458	-0.24849
Trafficking	Trafficking: ER/Golgi: mannosidase	4	-0.032976	0.178655	0.107546	0.286201
Trafficking	Trafficking: ER/Golgi: oligomeric Golgi complex	8	0.102234	-0.985908	0.129078	-0.856829
Trafficking	Trafficking: ER/Golgi: trafficking protein particle complex	9	-0.0621373	-0.696281	0.325938	-0.370343
Trafficking	Trafficking: exocyst	8	-0.189514	-0.511462	0.188921	-0.322541
Trafficking	Trafficking: unassigned	9	0.0353438	-0.232831	-0.0746077	-0.307439
Trafficking	Trafficking: vesicle targeting/fusion: CHMP	9	0.163048	-0.25258	-0.0725399	-0.32512
Trafficking	Trafficking: vesicle targeting/fusion: CORVET/HOPS	4	-0.0688817	-1.35273	0.510231	-0.842499
Trafficking	Trafficking: vesicle targeting/fusion: ESCRT	5	0.0977489	-0.497162	-0.0632389	-0.560401
Trafficking	Trafficking: vesicle targeting/fusion: GARP	5	-0.0446287	-0.347559	-0.00248643	-0.350045
Trafficking	Trafficking: vesicle targeting/fusion: RAB	8	-0.015953	-0.0849069	0.0586522	-0.0262547
Trafficking	Trafficking: vesicle targeting/fusion: retromer	5	0.0271271	-0.92047	0.577851	-0.342619
Trafficking	Trafficking: vesicle targeting/fusion: SNARE	14	-0.0959515	-0.44069	0.407518	-0.0331718
Trafficking	Trafficking: vesicle targeting/fusion: unassigned	7	-0.025992	-0.433178	0.0450448	-0.388133
Transcription factor	Transcription factor: AIRD	1	0.0784297	-1.96954	0.663806	-1.30573
Transcription factor	Transcription factor: AP2	1	-0.147063	-2.08355	0.975922	-1.10763
Transcription factor	Transcription factor: bHLH	6	-0.0620539	0.551354	-0.0538661	0.497488
Transcription factor	Transcription factor: bZIP	14	-0.0148881	0.548866	-0.112146	0.43672
Transcription factor	Transcription factor: CREB	3	0.0440016	-0.121482	-0.175796	-0.297279
Transcription factor	Transcription factor: ETS	3	-0.431377	1.40246	-0.201421	1.20104
Transcription factor	Transcription factor: forkhead	5	-0.138441	0.287224	-0.089881	0.197343
Transcription factor	Transcription factor: GATA	3	-0.193751	1.64907	-0.353572	1.2955
Transcription factor	Transcription factor: HMG box	1	-0.862745	1.66361	-0.427688	1.23592
Transcription factor	Transcription factor: homeodomain	14	-0.103148	0.0191267	0.258296	0.277422
Transcription factor	Transcription factor: NF	5	0.133954	-0.651337	0.310693	-0.340644
Transcription factor	Transcription factor: NHR	42	-0.232483	1.20205	-0.272385	0.929662
Transcription factor	Transcription factor: T box	1	-0.662237	0.97336	0.58272	1.55608
Transcription factor	Transcription factor: unassigned	13	-0.0250933	-0.336216	0.233612	-0.102604
Transcription factor	Transcription factor: ZF	17	-0.0468065	-0.1185	0.0994903	-0.0190092
Transcription: chromatin	Transcription: chromatin modification: acetyltransferase	9	-0.0313056	-0.977351	0.518301	-0.459051
Transcription: chromatin	Transcription: chromatin modification: deacetylase	7	-0.0200001	-1.19303	0.601913	-0.59112
Transcription: chromatin	Transcription: chromatin modification: demethylase	7	0.0666843	-1.10822	0.408914	-0.699308
Transcription: chromatin	Transcription: chromatin modification: methyltransferase	13	-0.000523385	-1.01175	0.540095	-0.471651
Transcription: chromatin	Transcription: chromatin modification: NURD	3	0.115297	-0.615781	-0.0136154	-0.629396
Transcription: chromatin	Transcription: chromatin modification: NURF	1	-0.0352837	-0.864684	0.740856	-0.123827
Transcription: chromatin	Transcription: chromatin modification: REST	2	-0.213543	-1.58323	1.18736	-0.395866
Transcription: chromatin	Transcription: chromatin modification: SWI/SNF	13	0.0284116	-1.28254	0.468431	-0.814108
Transcription: chromatin	Transcription: chromatin modification: unassigned	29	-0.00240356	-1.10294	0.531795	-0.571148
Transcription: chromatin	Transcription: chromatin structure: histone	16	0.100771	-0.458722	0.248681	-0.210041
Transcription: chromatin	Transcription: chromatin structure: HMG protein	6	0.0157384	-0.947794	0.602845	-0.344949
Transcription: chromatin	Transcription: chromatin structure: unassigned	9	0.0298153	-1.4135	0.782337	-0.631165
Transcription: dosage compensation	Transcription: dosage compensation	8	-0.0985474	-0.209614	0.380571	0.170957
Transcription: general machinery	Transcription: general machinery: RNA Pol I: subunit	4	-0.12871	-0.893872	0.807478	-0.0863948
Transcription: general machinery	Transcription: general machinery: RNA Pol I: unassigned	2	-0.0171391	-0.308004	0.179021	-0.128983
Transcription: general machinery	Transcription: general machinery: RNA Pol II: CCR4/NOT	10	0.104303	-0.587534	0.241511	-0.346023
Transcription: general machinery	Transcription: general machinery: RNA Pol II: elongation	24	0.0272226	-0.533671	0.108068	-0.425603
Transcription: general machinery	Transcription: general machinery: RNA Pol II: integrator	8	0.0441088	-0.759041	0.15817	-0.600871
Transcription: general machinery	Transcription: general machinery: RNA Pol II: mediator	21	0.0491235	-0.877534	0.404804	-0.472731
Transcription: general machinery	Transcription: general machinery: RNA Pol II: subunit	16	0.207564	-0.896852	0.368094	-0.528757
Transcription: general machinery	Transcription: general machinery: RNA Pol II: TFIIA	1	0.26068	-3.07705	1.63814	-1.43891
Transcription: general machinery	Transcription: general machinery: RNA Pol II: TFIIB	1	0.295622	-1.21605	-0.459452	-1.6755
Transcription: general machinery	Transcription: general machinery: RNA Pol II: TFIID	17	-0.0382185	-1.03332	0.504683	-0.528637
Transcription: general machinery	Transcription: general machinery: RNA Pol II: TFIIE	2	0.0640036	-0.982614	0.276599	-0.706015
Transcription: general machinery	Transcription: general machinery: RNA Pol II: TFIIF	2	0.156863	-1.03863	0.133053	-0.905581
Transcription: general machinery	Transcription: general machinery: RNA Pol II: TFIIH	5	-0.100977	-1.50564	0.646814	-0.858826
Transcription: general machinery	Transcription: general machinery: RNA Pol II: unassigned	4	0.0728284	-1.09002	0.193144	-0.896877
Transcription: general machinery	Transcription: general machinery: RNA Pol III	10	0.0770387	-0.594762	-0.0357238	-0.630485
Transcription: general machinery	Transcription: general machinery: unassigned	3	0.160301	-1.44657	0.608045	-0.838522
Transcription: unassigned	Transcription: unassigned	12	-0.0240128	-0.590052	0.294814	-0.295238
Transmembrane protein	Transmembrane protein: ER	29	0.0823257	-0.0457548	-0.128569	-0.174324
Transmembrane protein	Transmembrane protein: seven transmembrane receptor: srg	1	0.059281	0.819905	0.599273	1.41918
Transmembrane protein	Transmembrane protein: seven transmembrane receptor: sri	1	0.620991	-1.42748	0.381857	-1.04562
Transmembrane protein	Transmembrane protein: seven transmembrane receptor: srp	1	0.26571	-0.51219	0.0337335	-0.478456
Transmembrane protein	Transmembrane protein: seven transmembrane receptor: srr	1	-0.566876	1.02178	0.35381	1.37559
Transmembrane protein	Transmembrane protein: seven transmembrane receptor: srv	1	-0.176559	1.23833	-0.316887	0.921448
Transmembrane protein	Transmembrane protein: seven transmembrane receptor: str	1	-0.629787	1.75592	0.267323	2.02324
Transmembrane protein	Transmembrane protein: seven transmembrane receptor: unassigned	6	-0.319735	1.43094	-0.310418	1.12052
Transmembrane protein	Transmembrane protein: unassigned	366	-0.105119	0.536757	-0.00705918	0.529698
Transmembrane transport	Transmembrane transport: ABC	31	-0.165341	0.689935	-0.116101	0.573834
Transmembrane transport	Transmembrane transport: acid sensing	3	-0.459923	1.70567	-0.116832	1.58884
Transmembrane transport	Transmembrane transport: amino acid	19	-0.115955	0.842379	-0.192041	0.650338
Transmembrane transport	Transmembrane transport: ammonium	2	-0.192681	0.730717	-0.341724	0.388993
Transmembrane transport	Transmembrane transport: anion	5	-0.239262	0.584093	0.169301	0.753394
Transmembrane transport	Transmembrane transport: aquaporin	8	-0.100988	1.6371	-0.745687	0.891409
Transmembrane transport	Transmembrane transport: B12	1	-0.285995	2.3533	-0.528651	1.82465
Transmembrane transport	Transmembrane transport: calcium channel	11	-0.198245	0.437936	0.0929273	0.530864
Transmembrane transport	Transmembrane transport: chloride channel	10	-0.105674	0.783079	-0.185232	0.597847
Transmembrane transport	Transmembrane transport: citrate	2	-0.0947374	2.16879	-0.663184	1.50561
Transmembrane transport	Transmembrane transport: extracellular ligand gated channel	3	-0.117692	1.74666	-0.500035	1.24662
Transmembrane transport	Transmembrane transport: glutamate channel	2	0.0624157	1.43124	-0.590845	0.840397
Transmembrane transport	Transmembrane transport: heme	4	-0.38042	1.61734	-0.0381279	1.57921
Transmembrane transport	Transmembrane transport: ion	3	-0.144534	-0.151138	0.674502	0.523364
Transmembrane transport	Transmembrane transport: ion channel	4	-0.638501	1.96441	-0.0101049	1.9543
Transmembrane transport	Transmembrane transport: lipid	6	-0.17403	0.0234278	0.29653	0.319957
Transmembrane transport	Transmembrane transport: major facilitator	27	-0.1843	0.728745	0.019833	0.748578
Transmembrane transport	Transmembrane transport: metal ion	2	-0.049872	0.698027	-0.0702907	0.627736
Transmembrane transport	Transmembrane transport: mitochondrial: solute carrier	24	0.0287403	0.0371699	-0.0594789	-0.022309
Transmembrane transport	Transmembrane transport: monocarboxylate	4	-0.0357139	0.67849	-0.618169	0.0603218
Transmembrane transport	Transmembrane transport: nucleotide gated channel	2	-0.0820124	-0.519774	0.224904	-0.29487
Transmembrane transport	Transmembrane transport: potassium channel	15	-0.2846	1.31424	-0.205042	1.10919
Transmembrane transport	Transmembrane transport: sodium channel	7	-0.13553	1.12226	-0.206499	0.915763
Transmembrane transport	Transmembrane transport: solute carrier	98	-0.204341	0.885153	-0.0723342	0.812819
Transmembrane transport	Transmembrane transport: sugar	5	-0.151423	0.967281	-0.21297	0.754311
Transmembrane transport	Transmembrane transport: sulfate	2	-0.733908	1.62805	0.821281	2.44933
Transmembrane transport	Transmembrane transport: TRP channel	3	-0.43875	1.13562	-0.0140921	1.12153
Transmembrane transport	Transmembrane transport: unassigned	35	-0.0927051	0.584429	-0.104253	0.480176
Unassigned	Unassigned	920	-0.0654762	0.0408062	0.112319	0.153125
Unassigned	Unassigned: ALS2cr12 domain	3	0.107961	0.879489	-0.856994	0.0224948
Unassigned	Unassigned: BTB and MATH domain	8	-0.0101986	-1.14704	0.565903	-0.581134
Unassigned	Unassigned: Glycosyltransferase family A	1	-0.292414	2.6825	-0.505864	2.17663
Unassigned	Unassigned: hydrolase	9	-0.440053	0.886569	-0.201318	0.685251
Unassigned	Unassigned: MADF domain	3	0.159466	-1.89557	0.878287	-1.01729
Unassigned	Unassigned: membrane spanning domain	29	-0.200917	0.767702	0.050714	0.818416
Unassigned	Unassigned: meprin-associated Traf homology domain	1	-0.649387	1.62977	-0.78369	0.846079
Unassigned	Unassigned: prion domain	34	-0.130388	0.369427	-0.0207673	0.348659
Unassigned	Unassigned: regulated by multiple stresses	534	-0.0502647	0.421952	0.0120724	0.434025
Unassigned	Unassigned: TransThyretin-Related family domain	13	-0.133701	1.88679	-0.293432	1.59336
