# Supplementary material for: Neuronal temperature perception induces specific defenses that enable C. elegans to cope with the enhanced reactivity of hydrogen peroxide at high temperature
Source: eLife. 2022 Oct 13;11:e78941. doi: 10.7554/eLife.78941 (PMC9635881; doi:10.7554/eLife.78941)
Supplement: Figure 8—source data 1. [file elife-78941-fig8-data1.xlsx]

## Sheet: Figure 8
Figure 8
GeneName	GeneSymbol	TranscriptID	Intercept_baseMean	Intercept_log2FoldChange	Intercept_lfcSE	Intercept_stat	Intercept_pvalue	Intercept_padj	daf16_baseMean	daf16_log2FoldChange	daf16_lfcSE	daf16_stat	daf16_pvalue	daf16_padj	AFD_baseMean	AFD_log2FoldChange	AFD_lfcSE	AFD_stat	AFD_pvalue	AFD_padj	Set_RF_201111_vs_MMB_200228_baseMean	Set_RF_201111_vs_MMB_200228_log2FoldChange	Set_RF_201111_vs_MMB_200228_lfcSE	Set_RF_201111_vs_MMB_200228_stat	Set_RF_201111_vs_MMB_200228_pvalue	Set_RF_201111_vs_MMB_200228_padj	daf16.AFD_baseMean	daf16.AFD_log2FoldChange	daf16.AFD_lfcSE	daf16.AFD_stat	daf16.AFD_pvalue	daf16.AFD_padj	AFD + daf16 terms	AFD+ AFD.d16
WBGene00000001	aap-1	Y110A7A.10	50.9365	5.70871	0.216002	26.429	6.35968e-154	1.04421e-153	50.9365	-0.0886203	0.305062	-0.290499	0.771435	0.99478	50.9365	-1.92041	0.336932	-5.69968	1.20033e-08	4.40561e-08	50.9365	0.830714	0.29327	2.83259	0.00461727	0.0115637	50.9365	0.6584	0.482274	1.3652	0.172191	0.377814	-2.00903	-1.26201
WBGene00000005	aat-4	T13A10.10	15.9844	4.34297	0.232289	18.6964	5.29264e-78	6.68092e-78	15.9844	-0.329874	0.330089	-0.99935	0.317625	1	15.9844	1.53996	0.482078	3.19442	0.00140115	0.00240257	15.9844	-1.80047	0.438811	-4.10307	4.07702e-05	0.000175712	15.9844	0.659198	0.540607	1.21937	0.222705	0.443181	1.21008	2.19916
WBGene00000006	aat-5	C55C2.5	12.4675	3.61165	0.34185	10.565	4.33001e-26	4.58907e-26	12.4675	-0.478587	0.487297	-0.982126	0.326038	1	12.4675	1.85915	0.556041	3.34355	0.000827148	0.00147339	12.4675	-1.07437	0.549004	-1.95694	0.0503541	0.0914819	12.4675	-0.202379	0.727595	-0.278148	0.780899	1	1.38056	1.65677
WBGene00000010	aat-9	Y53H1C.1	17.1685	4.15868	0.19253	21.6002	1.78823e-103	2.46265e-103	17.1685	0.293582	0.26629	1.10249	0.270248	1	17.1685	-0.303284	0.377874	-0.802606	0.422202	0.467377	17.1685	0.0246509	0.301616	0.0817292	0.934862	0.953054	17.1685	-0.349974	0.512851	-0.682408	0.494981	0.695002	-0.00970214	-0.653257
WBGene00000016	abf-5	T22H6.5	34.6946	3.95539	0.302166	13.0901	3.74941e-39	4.14128e-39	34.6946	-0.214533	0.427635	-0.501675	0.615896	0.99478	34.6946	0.316523	0.393908	0.803544	0.42166	0.466847	34.6946	1.36576	0.408392	3.34423	0.000825103	0.00255129	34.6946	0.0595138	0.590506	0.100784	0.919722	0.9623	0.10199	0.376037
WBGene00000017	abf-6	T22H6.7	26.0529	3.25776	0.33283	9.78808	1.2668e-22	1.32755e-22	26.0529	-0.278123	0.47216	-0.589043	0.555832	0.99478	26.0529	0.447504	0.430352	1.03986	0.298407	0.340911	26.0529	1.56033	0.449044	3.47479	0.00051126	0.00168376	26.0529	0.2206	0.646253	0.341352	0.732839	0.857254	0.169381	0.668104
WBGene00000018	abl-1	M79.1	24.7221	5.47215	0.159976	34.206	1.97224e-256	4.5528e-256	24.7221	-0.116425	0.225761	-0.515699	0.606065	0.99478	24.7221	0.29875	0.344246	0.867837	0.385483	0.429497	24.7221	-1.40653	0.280224	-5.01932	5.1856e-07	3.35723e-06	24.7221	-0.929851	0.50093	-1.85625	0.0634178	0.197846	0.182325	-0.631101
WBGene00000020	abt-2	F12B6.1	31.8311	5.73869	0.244447	23.4763	7.13059e-122	1.04969e-121	31.8311	-0.807474	0.348664	-2.31591	0.0205633	0.769638	31.8311	1.40914	0.384801	3.66199	0.000250268	0.000487021	31.8311	-1.72074	0.376322	-4.57253	4.8186e-06	2.57004e-05	31.8311	-0.167953	0.533834	-0.314617	0.753052	0.86795	0.601663	1.24118
WBGene00000022	abt-4	Y39D8C.1	89.0746	6.71037	0.133983	50.0838	0	0	89.0746	-0.393264	0.190273	-2.06684	0.0387496	0.811344	89.0746	0.966689	0.214145	4.51418	6.35634e-06	1.58042e-05	89.0746	-0.958601	0.204772	-4.68132	2.85038e-06	1.57485e-05	89.0746	0.353535	0.286262	1.235	0.216829	0.43613	0.573425	1.32022
WBGene00000040	aco-1	ZK455.1	137.651	7.63118	0.085573	89.1774	0	0	137.651	-0.140734	0.120888	-1.16416	0.244358	0.993234	137.651	1.52322	0.161901	9.40834	5.04049e-21	6.14424e-20	137.651	-1.75688	0.150587	-11.6669	1.88223e-31	9.93144e-30	137.651	-0.521159	0.203551	-2.56034	0.0104571	0.0563953	1.38249	1.00206
WBGene00000041	aco-2	F54H12.1	180.171	7.2567	0.085474	84.8995	0	0	180.171	0.0677088	0.119988	0.564297	0.572552	0.99478	180.171	0.581459	0.13279	4.37878	1.19345e-05	2.85032e-05	180.171	0.0155515	0.126382	0.123051	0.902066	0.928461	180.171	-0.340842	0.184806	-1.84432	0.0651362	0.201628	0.649168	0.240616
WBGene00000063	act-1	T04C12.6	269.849	8.0096	0.115543	69.3217	0	0	269.849	0.108285	0.162958	0.664496	0.506373	0.99478	269.849	0.659089	0.158466	4.15918	3.19394e-05	7.14352e-05	269.849	-0.276001	0.161002	-1.71428	0.0864782	0.143554	269.849	-0.487802	0.230804	-2.11349	0.0345591	0.131023	0.767373	0.171286
WBGene00000064	act-2	T04C12.5	425.184	9.0222	0.111684	80.7835	0	0	425.184	0.314992	0.157582	1.99891	0.0456177	0.84626	425.184	-0.920337	0.155407	-5.9221	3.17862e-09	1.25766e-08	425.184	-0.237653	0.151916	-1.56438	0.117729	0.184681	425.184	0.350479	0.225343	1.55531	0.119872	0.297723	-0.605345	-0.569858
WBGene00000065	act-3	T04C12.4	335.733	8.0875	0.139416	58.0098	0	0	335.733	0.0866072	0.196839	0.439989	0.659945	0.99478	335.733	0.97002	0.180354	5.37841	7.51453e-08	2.50383e-07	335.733	-0.00530844	0.189639	-0.0279924	0.977668	0.984599	335.733	-0.977105	0.27034	-3.61436	0.000301096	0.00413977	1.05663	-0.0070855
WBGene00000066	act-4	M03F4.2	2737.83	9.8575	0.0929053	106.103	0	0	2737.83	-0.0202361	0.131299	-0.154123	0.877513	0.995022	2737.83	1.1705	0.114379	10.2335	1.40378e-24	2.22527e-23	2737.83	1.42757	0.123356	11.5728	5.66353e-31	2.88527e-29	2737.83	-0.968285	0.174607	-5.54552	2.93076e-08	3.18583e-06	1.15026	0.202211
WBGene00000067	act-5	T25C8.2	424.762	7.73731	0.100271	77.1638	0	0	424.762	0.0794382	0.141241	0.562429	0.573824	0.99478	424.762	1.47675	0.131406	11.238	2.65247e-29	5.8489e-28	424.762	0.441972	0.138537	3.19029	0.0014213	0.00410766	424.762	-0.812243	0.193508	-4.19746	2.69929e-05	0.000654319	1.55618	0.664503
WBGene00000068	acy-1	F17C8.1	21.2962	5.34206	0.266892	20.0158	4.01039e-89	5.25822e-89	21.2962	-0.718551	0.380407	-1.8889	0.0589052	0.894412	21.2962	0.454078	0.451646	1.00539	0.314711	0.357271	21.2962	-1.59813	0.411223	-3.88628	0.000101792	0.000395757	21.2962	0.440385	0.616516	0.714312	0.475034	0.679164	-0.264474	0.894463
WBGene00000070	acy-3	C44F1.5	14.521	4.08773	0.250954	16.2887	1.18634e-59	1.40283e-59	14.521	-0.192488	0.354969	-0.542266	0.587635	1	14.521	0.905569	0.452398	2.00171	0.045316	0.0604459	14.521	-0.883866	0.411775	-2.14648	0.0318347	0.0616739	14.521	-0.0171714	0.585432	-0.0293312	0.9766	1	0.713082	0.888398
WBGene00000073	add-2	F57F5.4	22.7674	4.83484	0.21353	22.6424	1.6584e-113	2.37093e-113	22.7674	0.122169	0.299702	0.407635	0.683542	0.99478	22.7674	2.00884	0.40643	4.94263	7.7074e-07	2.20335e-06	22.7674	-1.80572	0.387793	-4.6564	3.21792e-06	1.75819e-05	22.7674	-1.11368	0.501493	-2.22074	0.0263686	0.107316	2.131	0.89515
WBGene00000074	adm-2	C04A11.4	25.0885	5.53667	0.190474	29.0678	9.17035e-186	1.68302e-185	25.0885	-0.483699	0.271231	-1.78335	0.0745294	0.923859	25.0885	-0.0360133	0.376686	-0.0956055	0.923834	0.934972	25.0885	-1.37024	0.309098	-4.43303	9.29175e-06	4.62521e-05	25.0885	0.398727	0.502413	0.793625	0.427414	0.642645	-0.519712	0.362714
WBGene00000080	adr-2	T20H4.4	53.6591	5.81727	0.143059	40.6635	0	0	53.6591	0.201603	0.200205	1.00698	0.313944	0.99478	53.6591	-2.85927	0.331517	-8.6248	6.42059e-18	6.18369e-17	53.6591	0.758982	0.200074	3.7935	0.000148538	0.000555852	53.6591	1.49461	0.413761	3.61226	0.000303539	0.00416514	-2.65767	-1.36466
WBGene00000081	ads-1	Y50D7A.7	187.755	6.42309	0.152033	42.2481	0	0	187.755	-0.0134772	0.214388	-0.0628634	0.949875	0.996752	187.755	1.91428	0.20073	9.53659	1.47601e-21	1.89293e-20	187.755	0.263722	0.21246	1.24128	0.214503	0.30355	187.755	-0.794015	0.292147	-2.71786	0.0065706	0.0405066	1.9008	1.12027
WBGene00000083	adt-2	F08C6.1	42.1213	4.99063	0.214589	23.2567	1.21667e-119	1.77303e-119	42.1213	-0.362439	0.304842	-1.18894	0.234463	0.993234	42.1213	1.00108	0.302294	3.31161	0.000927592	0.00163926	42.1213	0.218651	0.305906	0.714767	0.474753	0.570151	42.1213	-0.666795	0.447131	-1.49128	0.135889	0.324204	0.638642	0.334286
WBGene00000088	aex-5	F32A7.6	125.634	5.09326	0.170667	29.8432	1.07642e-195	2.04094e-195	125.634	-0.157514	0.24111	-0.653287	0.513572	0.99478	125.634	3.67698	0.256544	14.3327	1.36648e-46	7.26199e-45	125.634	-0.568701	0.272018	-2.09067	0.0365575	0.0695289	125.634	-0.420369	0.320495	-1.31162	0.189647	0.401109	3.51946	3.25661
WBGene00000090	age-1	B0334.8	58.9477	6.56266	0.204648	32.0681	1.22957e-225	2.55494e-225	58.9477	-0.0879722	0.289176	-0.304217	0.760963	0.99478	58.9477	-1.68357	0.34176	-4.92619	8.38478e-07	2.38683e-06	58.9477	-0.439443	0.285144	-1.54113	0.123286	0.192215	58.9477	0.805519	0.474082	1.69911	0.0892977	0.246762	-1.77155	-0.878054
WBGene00000092	ags-3	F32A6.4	29.7553	4.8985	0.158394	30.9261	5.32721e-210	1.05473e-209	29.7553	-0.0641887	0.222748	-0.288168	0.773218	0.99478	29.7553	1.86153	0.299486	6.21576	5.10764e-10	2.21942e-09	29.7553	-1.04463	0.285319	-3.66127	0.000250966	0.000894301	29.7553	-1.18125	0.38781	-3.04596	0.00231936	0.0189833	1.79735	0.680281
WBGene00000093	agt-1	Y62E10A.5	21.6426	4.04244	0.254572	15.8794	8.80702e-57	1.03249e-56	21.6426	0.0822759	0.357097	0.230402	0.817779	0.99478	21.6426	-0.834491	0.399006	-2.09142	0.0364902	0.049423	21.6426	0.915685	0.354129	2.58574	0.009717	0.0219643	21.6426	0.30338	0.564384	0.537541	0.590894	0.764951	-0.752215	-0.531111
WBGene00000094	agt-2	F09E5.13	48.8464	5.55192	0.133332	41.6397	0	0	48.8464	0.196155	0.185863	1.05538	0.291253	0.99478	48.8464	-2.84266	0.319588	-8.89476	5.85472e-19	6.19611e-18	48.8464	1.05281	0.185999	5.66029	1.51114e-08	1.30054e-07	48.8464	1.17739	0.404795	2.9086	0.00363049	0.0266709	-2.64651	-1.66527
WBGene00000097	aip-1	F58E10.4	26.0705	4.84146	0.187069	25.8806	1.10245e-147	1.77579e-147	26.0705	-0.233972	0.264997	-0.882921	0.377279	0.99478	26.0705	-0.581767	0.329183	-1.76731	0.0771771	0.0986345	26.0705	0.197688	0.274937	0.719032	0.472121	0.567821	26.0705	0.188287	0.463778	0.405985	0.684754	0.827917	-0.815738	-0.39348
WBGene00000098	air-1	K07C11.2	115.046	6.96827	0.164245	42.4261	0	0	115.046	0.196318	0.231464	0.848156	0.396351	0.99478	115.046	-1.93262	0.25376	-7.61593	2.61806e-14	1.84714e-13	115.046	0.488447	0.223275	2.18765	0.0286951	0.0565104	115.046	0.902139	0.355703	2.53622	0.0112058	0.0593743	-1.7363	-1.03048
WBGene00000099	air-2	B0207.4	48.2063	6.25382	0.118528	52.7624	0	0	48.2063	-0.078287	0.167048	-0.46865	0.63932	0.99478	48.2063	-1.69311	0.287636	-5.88629	3.94961e-09	1.54451e-08	48.2063	-0.346025	0.182296	-1.89816	0.0576755	0.102762	48.2063	0.677885	0.377086	1.79769	0.0722254	0.214533	-1.7714	-1.01523
WBGene00000100	ajm-1	C25A11.4	101.021	6.90565	0.127859	54.01	0	0	101.021	-0.247617	0.181027	-1.36784	0.171361	0.977785	101.021	1.65397	0.205328	8.05527	7.9306e-16	6.43066e-15	101.021	-1.3171	0.201582	-6.53386	6.40973e-11	7.72409e-10	101.021	-0.519529	0.274283	-1.89413	0.0582075	0.186355	1.40635	1.13444
WBGene00000101	aka-1	D1022.7	141.276	7.10063	0.103565	68.5621	0	0	141.276	0.060338	0.145668	0.414215	0.678716	0.99478	141.276	-1.89637	0.180576	-10.5018	8.47632e-26	1.47676e-24	141.276	0.805851	0.142963	5.63678	1.73264e-08	1.47284e-07	141.276	0.821868	0.247395	3.32209	0.000893467	0.00937534	-1.83603	-1.0745
WBGene00000102	akt-1	C12D8.10	95.2492	6.56938	0.146704	44.7799	0	0	95.2492	0.163338	0.20636	0.791518	0.428642	0.99478	95.2492	-1.7191	0.238283	-7.21455	5.41117e-13	3.3562e-12	95.2492	0.629391	0.201565	3.12252	0.00179313	0.00503835	95.2492	0.844481	0.329156	2.5656	0.0102998	0.0558936	-1.55576	-0.874622
WBGene00000105	alg-1	F48F7.1	38.0177	5.33729	0.170599	31.2855	7.35213e-215	1.47462e-214	38.0177	-0.196456	0.241336	-0.814035	0.415625	0.99478	38.0177	1.43431	0.289124	4.96087	7.01798e-07	2.01641e-06	38.0177	-0.918399	0.27694	-3.31624	0.000912373	0.0027873	38.0177	-0.530026	0.383003	-1.38387	0.166399	0.370028	1.23785	0.904279
WBGene00000106	alg-2	T07D3.7	56.1649	6.69174	0.147666	45.3167	0	0	56.1649	-0.0999949	0.208562	-0.479448	0.63162	0.99478	56.1649	-0.672566	0.284716	-2.36223	0.0181653	0.0258636	56.1649	-1.21514	0.226245	-5.37091	7.83391e-08	6.0155e-07	56.1649	0.182188	0.387919	0.469654	0.638602	0.799057	-0.772561	-0.490378
WBGene00000107	alh-1	F54D8.3	196.491	7.17514	0.0998813	71.8366	0	0	196.491	-0.103117	0.140976	-0.731448	0.464506	0.99478	196.491	0.296245	0.141433	2.0946	0.0362068	0.0490751	196.491	0.548964	0.139779	3.92738	8.58768e-05	0.000339418	196.491	-0.280295	0.207001	-1.35408	0.175711	0.381888	0.193128	0.0159502
WBGene00000109	alh-3	F36H1.6	43.8603	5.41824	0.138387	39.1529	0	0	43.8603	-0.0608538	0.194684	-0.312577	0.754602	0.99478	43.8603	0.344999	0.241811	1.42673	0.153657	0.185529	43.8603	-0.125631	0.214771	-0.584953	0.55858	0.648472	43.8603	-0.203612	0.33022	-0.616596	0.537501	0.727651	0.284145	0.141387
WBGene00000110	alh-4	T05H4.13	149.463	6.43164	0.0937692	68.5901	0	0	149.463	0.0114014	0.13146	0.0867291	0.930887	0.995931	149.463	1.46484	0.140523	10.4242	1.92202e-25	3.32505e-24	149.463	0.220008	0.141292	1.55712	0.119442	0.187011	149.463	-0.741796	0.194671	-3.8105	0.000138686	0.00238231	1.47624	0.723044
WBGene00000112	alh-6	F56D12.1	54.3434	5.24166	0.17802	29.4441	1.49622e-190	2.78754e-190	54.3434	-0.0923771	0.251086	-0.36791	0.71294	0.99478	54.3434	1.07743	0.262555	4.10365	4.06688e-05	8.95441e-05	54.3434	0.0365032	0.261083	0.139815	0.888806	0.918653	54.3434	-0.14316	0.364334	-0.392937	0.694366	0.835473	0.985055	0.934272
WBGene00000113	alh-7	F45H10.1	16.1782	3.41931	0.343669	9.94943	2.53627e-23	2.66431e-23	16.1782	0.327399	0.480134	0.681892	0.495308	1	16.1782	0.455981	0.489748	0.931054	0.351826	0.395576	16.1782	0.540139	0.484577	1.11466	0.264996	0.36017	16.1782	-0.482377	0.701094	-0.688034	0.491431	0.691662	0.783381	-0.0263954
WBGene00000114	alh-8	F13D12.4	1077.34	9.07175	0.0824989	109.962	0	0	1077.34	0.0728319	0.116406	0.62567	0.531532	0.99478	1077.34	2.01086	0.106524	18.877	1.76157e-79	3.17384e-77	1077.34	0.0298991	0.113385	0.263696	0.792014	0.846884	1077.34	-0.892654	0.157033	-5.68452	1.31183e-08	1.57352e-06	2.08369	1.1182
WBGene00000115	alh-9	F01F1.6	218.897	7.13983	0.102324	69.7768	0	0	218.897	-0.141705	0.144558	-0.98026	0.326958	0.99478	218.897	1.69168	0.146298	11.5632	6.3283e-31	1.62316e-29	218.897	-0.184061	0.149972	-1.2273	0.21971	0.309025	218.897	-0.493177	0.204404	-2.41275	0.0158325	0.0756503	1.54998	1.1985
WBGene00000116	alh-10	C54D1.4	22.687	4.66862	0.192683	24.2296	1.08553e-129	1.6422e-129	22.687	-0.292739	0.2736	-1.06995	0.284642	0.99478	22.687	0.198708	0.354241	0.560939	0.574839	0.612041	22.687	-0.443151	0.304674	-1.45451	0.145805	0.220687	22.687	0.607275	0.45983	1.32065	0.186618	0.396567	-0.094031	0.805983
WBGene00000117	alh-11	F42G9.5	35.163	5.15208	0.15276	33.7267	2.34994e-249	5.28753e-249	35.163	0.160895	0.213182	0.754732	0.45041	0.99478	35.163	0.00255516	0.268548	0.00951473	0.992408	0.993215	35.163	0.0354661	0.232468	0.152563	0.878743	0.91208	35.163	-0.554457	0.378138	-1.46628	0.142571	0.334485	0.16345	-0.551902
WBGene00000118	alh-12	Y69F12A.2	70.9724	5.44287	0.128614	42.3193	0	0	70.9724	-0.0429815	0.180654	-0.237921	0.811942	0.99478	70.9724	1.52321	0.199995	7.61626	2.61129e-14	1.84413e-13	70.9724	0.0418769	0.198923	0.210519	0.833263	0.878327	70.9724	-0.685151	0.272017	-2.51878	0.0117762	0.0615201	1.48023	0.838063
WBGene00000120	aly-1	C01F6.5	28.1738	5.03451	0.155924	32.2883	1.02194e-228	2.13794e-228	28.1738	0.114989	0.217836	0.527872	0.597588	0.99478	28.1738	0.390755	0.282069	1.38532	0.165955	0.198979	28.1738	-0.278702	0.247449	-1.1263	0.260037	0.354998	28.1738	-1.75617	0.455909	-3.85201	0.000117154	0.00208881	0.505744	-1.36541
WBGene00000121	aly-2	F23B2.6	104.503	6.61351	0.135908	48.6618	0	0	104.503	0.349074	0.190523	1.83219	0.0669235	0.907978	104.503	-2.16765	0.231243	-9.37389	6.991e-21	8.43832e-20	104.503	0.905987	0.185556	4.88254	1.04728e-06	6.34639e-06	104.503	0.600809	0.318503	1.88635	0.0592477	0.188816	-1.81857	-1.56684
WBGene00000122	aly-3	M18.7	101.614	7.06498	0.119103	59.3184	0	0	101.614	0.135895	0.167535	0.811145	0.417282	0.99478	101.614	-1.39887	0.212389	-6.58634	4.50807e-11	2.23497e-10	101.614	-0.0510225	0.169698	-0.300666	0.763669	0.824499	101.614	0.389053	0.291751	1.33351	0.182365	0.390494	-1.26297	-1.00982
WBGene00000123	ama-1	F36A4.7	235.073	7.97247	0.143905	55.4008	0	0	235.073	-0.0827218	0.203378	-0.406739	0.6842	0.99478	235.073	-0.101802	0.192875	-0.527812	0.59763	0.633903	235.073	-0.0326234	0.19596	-0.166479	0.86778	0.904886	235.073	-0.0060107	0.285531	-0.0210509	0.983205	0.992051	-0.184524	-0.107813
WBGene00000133	amt-1	C05E11.4	17.3971	4.04754	0.299008	13.5366	9.51372e-42	1.05936e-41	17.3971	-0.256346	0.423588	-0.605177	0.545062	1	17.3971	0.552902	0.448556	1.23263	0.217714	0.256051	17.3971	-0.0534714	0.433913	-0.123231	0.901924	0.928444	17.3971	-0.329039	0.645869	-0.509452	0.610435	0.780724	0.296557	0.223863
WBGene00000138	amx-2	B0019.1	19.252	4.75233	0.275083	17.276	7.13867e-67	8.64907e-67	19.252	-0.384436	0.390461	-0.98457	0.324835	1	19.252	1.67421	0.49676	3.37025	0.000751002	0.00134717	19.252	-2.03091	0.471214	-4.30996	1.63282e-05	7.64848e-05	19.252	0.360529	0.602064	0.598823	0.549291	0.735763	1.28977	2.03473
WBGene00000140	anc-1	ZK973.6	287.197	6.81633	0.106492	64.008	0	0	287.197	0.00676631	0.149852	0.0451534	0.963985	0.997702	287.197	2.02781	0.14248	14.2322	5.77992e-46	3.00678e-44	287.197	0.43807	0.151004	2.90105	0.00371914	0.00956259	287.197	-0.840743	0.204851	-4.10417	4.05763e-05	0.000922513	2.03458	1.18707
WBGene00000142	aos-1	C08B6.9	49.2784	5.70333	0.13704	41.6181	0	0	49.2784	0.0357137	0.19236	0.18566	0.852711	0.99478	49.2784	-1.63807	0.277219	-5.90893	3.44334e-09	1.35803e-08	49.2784	0.433631	0.197927	2.19086	0.0284616	0.0561104	49.2784	1.11515	0.358478	3.11077	0.00186598	0.0161865	-1.60236	-0.522925
WBGene00000143	apc-2	K06H7.6	47.6463	6.17904	0.180199	34.2901	1.10222e-257	2.558e-257	47.6463	0.0466212	0.254022	0.183532	0.854381	0.99478	47.6463	-0.716948	0.314938	-2.27647	0.0228178	0.0319696	47.6463	-0.753705	0.264502	-2.84952	0.00437855	0.011009	47.6463	0.360075	0.42808	0.84114	0.400269	0.619229	-0.670327	-0.356873
WBGene00000144	apc-10	F15H10.3	46.8187	5.42233	0.195042	27.8009	4.23613e-170	7.35423e-170	46.8187	0.146208	0.27406	0.533487	0.593696	0.99478	46.8187	-2.1402	0.337472	-6.34187	2.26988e-10	1.03185e-09	46.8187	0.925271	0.266928	3.46636	0.000527547	0.00173046	46.8187	1.08484	0.456851	2.37462	0.0175672	0.0808837	-1.994	-1.05536
WBGene00000146	ape-1	F46F3.4	81.4467	6.61896	0.136363	48.5393	0	0	81.4467	0.0698439	0.191975	0.363817	0.715995	0.99478	81.4467	-1.78357	0.251728	-7.08529	1.38758e-12	8.22637e-12	81.4467	0.147668	0.192551	0.766903	0.443139	0.541431	81.4467	1.11191	0.333128	3.3378	0.00084444	0.00899659	-1.71372	-0.671652
WBGene00000147	aph-1	VF36H2L.1	35.6406	5.27444	0.190405	27.7011	6.76937e-169	1.16999e-168	35.6406	-0.284398	0.269961	-1.05348	0.292123	0.99478	35.6406	-1.42536	0.328786	-4.33521	1.45622e-05	3.4302e-05	35.6406	0.523283	0.26721	1.95832	0.0501925	0.0913232	35.6406	0.951169	0.453581	2.09702	0.0359918	0.134911	-1.70975	-0.474188
WBGene00000148	aph-2	ZC434.6	25.9837	5.42614	0.158458	34.2435	5.45133e-257	1.26195e-256	25.9837	-0.381653	0.225609	-1.69165	0.0907121	0.954102	25.9837	0.0153692	0.333148	0.0461332	0.963204	0.96779	25.9837	-1.07489	0.26662	-4.03155	5.54092e-05	0.000231378	25.9837	0.199283	0.44339	0.449453	0.653105	0.808335	-0.366283	0.214652
WBGene00000149	apl-1	C42D8.8	165.18	5.70533	0.126938	44.9456	0	0	165.18	0.0271779	0.178013	0.152673	0.878656	0.995022	165.18	1.78914	0.16638	10.7533	5.71616e-27	1.08548e-25	165.18	0.972054	0.17796	5.46219	4.70287e-08	3.7195e-07	165.18	-0.757693	0.242319	-3.12685	0.00176692	0.0155704	1.81632	1.03145
WBGene00000150	apm-1	F55A12.7	19.1212	3.81959	0.272193	14.0327	9.8374e-45	1.10355e-44	19.1212	-0.0874001	0.383693	-0.227787	0.819812	1	19.1212	1.34922	0.412779	3.26862	0.00108072	0.00189176	19.1212	-0.119309	0.410211	-0.290848	0.771168	0.830653	19.1212	-0.62305	0.572624	-1.08806	0.276569	0.502677	1.26182	0.72617
WBGene00000151	apn-1	T05H10.2	57.1953	6.41483	0.174531	36.7547	9.77871e-296	2.56517e-295	57.1953	-0.194551	0.246858	-0.788111	0.430632	0.99478	57.1953	-2.01522	0.314525	-6.40719	1.48226e-10	6.86487e-10	57.1953	-0.00602226	0.243694	-0.0247124	0.980284	0.986561	57.1953	0.854858	0.433853	1.97039	0.0487941	0.165268	-2.20977	-1.16036
WBGene00000155	app-1	W03G9.4	128.295	6.80067	0.100418	67.7237	0	0	128.295	0.184803	0.14055	1.31486	0.188557	0.981054	128.295	-0.62794	0.160327	-3.91661	8.98031e-05	0.000186237	128.295	0.602024	0.141991	4.23986	2.23658e-05	0.000102602	128.295	-0.0539903	0.227208	-0.237625	0.812172	0.89974	-0.443137	-0.68193
WBGene00000156	2022-04-01	K04G2.8	64.182	6.22837	0.189427	32.8801	4.22604e-237	9.12266e-237	64.182	0.0994807	0.266983	0.372611	0.709438	0.99478	64.182	-1.50725	0.299499	-5.03257	4.83937e-07	1.42936e-06	64.182	0.270784	0.26114	1.03693	0.29977	0.397987	64.182	0.586632	0.421054	1.39325	0.163545	0.366671	-1.40777	-0.920618
WBGene00000157	aps-2	F02E8.3	17.9949	4.4033	0.242734	18.1404	1.52905e-73	1.90025e-73	17.9949	-0.111515	0.342572	-0.325524	0.744784	1	17.9949	1.51556	0.417883	3.62677	0.000286992	0.000553671	17.9949	-1.10075	0.399737	-2.7537	0.00589262	0.0142952	17.9949	-0.978419	0.564296	-1.73388	0.08294	0.235132	1.40405	0.537145
WBGene00000158	apg-1	Y105E8A.9	70.9489	6.42884	0.153532	41.8729	0	0	70.9489	-0.240373	0.21734	-1.10598	0.268736	0.993234	70.9489	-0.257252	0.239047	-1.07616	0.281858	0.324363	70.9489	-0.200021	0.219731	-0.910298	0.362666	0.461978	70.9489	0.22634	0.339197	0.66728	0.504593	0.703216	-0.497625	-0.0309123
WBGene00000159	aps-1	F29G9.3	38.1622	5.39988	0.302264	17.8648	2.21775e-71	2.73909e-71	38.1622	0.00275607	0.42678	0.00645782	0.994847	0.998148	38.1622	-0.474893	0.418234	-1.13547	0.256177	0.297591	38.1622	0.161681	0.413053	0.39143	0.69548	0.769374	38.1622	-0.37855	0.623989	-0.606662	0.544076	0.732248	-0.472137	-0.853444
WBGene00000160	apb-1	Y71H2B.10	64.8896	6.21398	0.163893	37.9148	0	0	64.8896	-0.119213	0.231516	-0.514924	0.606606	0.99478	64.8896	-0.0161869	0.249331	-0.0649212	0.948237	0.955089	64.8896	-0.173328	0.234475	-0.739216	0.459776	0.557146	64.8896	-0.152219	0.358017	-0.425173	0.67071	0.818907	-0.1354	-0.168406
WBGene00000161	apa-2	T20B5.1	45.7359	6.29665	0.147048	42.8204	0	0	45.7359	-0.384425	0.208874	-1.84046	0.0657002	0.900769	45.7359	0.554599	0.281782	1.96819	0.0490466	0.0650696	45.7359	-1.58455	0.244895	-6.4703	9.78088e-11	1.15973e-09	45.7359	0.275512	0.364019	0.756861	0.449133	0.656708	0.170174	0.830111
WBGene00000162	apd-3	W09G10.4	64.4227	6.61997	0.104886	63.1159	0	0	64.4227	-0.100725	0.147928	-0.680903	0.495933	0.99478	64.4227	-0.837126	0.23478	-3.56557	0.000363063	0.000687195	64.4227	-0.737943	0.168594	-4.37704	1.203e-05	5.79687e-05	64.4227	0.887473	0.295354	3.00478	0.00265773	0.0211071	-0.937851	0.0503466
WBGene00000163	apb-3	R11A5.1	128.728	7.50094	0.119353	62.8467	0	0	128.728	0.0132116	0.168364	0.0784704	0.937454	0.995931	128.728	-1.41758	0.202843	-6.98858	2.7768e-12	1.5938e-11	128.728	-0.184336	0.16812	-1.09645	0.272881	0.368716	128.728	0.51588	0.281662	1.83155	0.0670179	0.205032	-1.40437	-0.901701
WBGene00000164	apm-3	F53H8.1	16.2298	4.29676	0.226147	18.9998	1.71059e-80	2.17564e-80	16.2298	0.275851	0.315358	0.874722	0.381725	1	16.2298	1.44394	0.436825	3.30555	0.000947919	0.00167199	16.2298	-1.35011	0.402675	-3.35285	0.000799834	0.0024872	16.2298	-1.13845	0.559645	-2.03424	0.0419271	0.149583	1.71979	0.30549
WBGene00000165	aps-3	Y48G8AL.14	31.1049	5.29806	0.179906	29.449	1.29632e-190	2.41573e-190	31.1049	0.049417	0.252893	0.195407	0.845074	0.99478	31.1049	-1.42162	0.344165	-4.13063	3.61766e-05	8.03478e-05	31.1049	0.155312	0.260141	0.597029	0.550488	0.640976	31.1049	0.232265	0.477027	0.486901	0.626329	0.791386	-1.3722	-1.18935
WBGene00000168	apx-1	K08D9.3	44.0328	5.7149	0.189426	30.1695	5.94719e-200	1.14198e-199	44.0328	-0.170898	0.267818	-0.638111	0.523402	0.99478	44.0328	-1.69435	0.329545	-5.1415	2.72553e-07	8.31619e-07	44.0328	0.329366	0.264542	1.24504	0.213116	0.302051	44.0328	1.08499	0.449103	2.4159	0.0156966	0.0752592	-1.86525	-0.609367
WBGene00000169	aqp-1	F32A5.5	23.1187	4.48514	0.212797	21.077	1.29193e-98	1.75077e-98	23.1187	-0.00875277	0.299186	-0.0292553	0.976661	0.998148	23.1187	2.17975	0.38226	5.70225	1.18233e-08	4.35822e-08	23.1187	-1.27362	0.373514	-3.40983	0.000650035	0.00207871	23.1187	-1.06673	0.478282	-2.23033	0.0257254	0.105154	2.17099	1.11302
WBGene00000170	aqp-2	C01G6.1	46.145	6.51531	0.178252	36.5512	1.70824e-292	4.4323e-292	46.145	-0.368618	0.252686	-1.4588	0.144621	0.968704	46.145	0.827837	0.316437	2.61612	0.00889352	0.0134047	46.145	-2.06381	0.28824	-7.16004	8.06532e-13	1.21095e-11	46.145	-0.203216	0.425168	-0.477967	0.632674	0.795414	0.459219	0.624621
WBGene00000172	aqp-4	F40F9.9	66.0891	4.86087	0.197367	24.6286	6.23452e-134	9.57274e-134	66.0891	-0.293618	0.280079	-1.04834	0.294482	0.99478	66.0891	2.41103	0.278965	8.64278	5.48596e-18	5.33221e-17	66.0891	-0.0421699	0.292951	-0.143949	0.885541	0.916304	66.0891	-0.598803	0.385358	-1.55389	0.120212	0.29808	2.11741	1.81223
WBGene00000175	aqp-7	M02F4.8	135.603	6.54701	0.0930683	70.3463	0	0	135.603	0.0349781	0.130434	0.268168	0.78857	0.99478	135.603	1.5959	0.14504	11.0032	3.68849e-28	7.65361e-27	135.603	-0.112431	0.144419	-0.778503	0.436273	0.535327	135.603	-1.12468	0.201228	-5.5891	2.28246e-08	2.56115e-06	1.63088	0.471219
WBGene00000176	aqp-8	K02G10.7	25.8373	5.02406	0.20067	25.0364	2.45498e-138	3.82836e-138	25.8373	0.121093	0.281673	0.429907	0.667263	0.99478	25.8373	0.377168	0.338817	1.11319	0.265627	0.307264	25.8373	-0.528916	0.307009	-1.7228	0.0849244	0.141425	25.8373	-1.15931	0.499282	-2.32196	0.0202351	0.0895518	0.498261	-0.782145
WBGene00000177	aqp-9	K07A1.16	15.0353	2.76636	0.337577	8.19475	2.51119e-16	2.59262e-16	15.0353	0.0570896	0.472502	0.120824	0.90383	1	15.0353	1.89624	0.500467	3.78894	0.00015129	0.000302785	15.0353	0.115654	0.513193	0.225362	0.821697	0.869237	15.0353	-0.378281	0.665424	-0.568481	0.569708	0.750656	1.95333	1.51796
WBGene00000178	aqp-10	ZK1321.3	44.1861	5.85133	0.186608	31.3562	8.00006e-216	1.61026e-215	44.1861	-0.300774	0.264461	-1.13731	0.255409	0.993234	44.1861	1.79457	0.313588	5.72272	1.04831e-08	3.88162e-08	44.1861	-1.66662	0.305256	-5.45976	4.76782e-08	3.76281e-07	44.1861	-0.429358	0.406401	-1.05649	0.290745	0.516658	1.4938	1.36522
WBGene00000179	aqp-11	ZK525.2	53.2851	4.57783	0.146377	31.2743	1.04372e-214	2.08942e-214	53.2851	-0.0493005	0.205086	-0.240389	0.810029	0.99478	53.2851	2.01427	0.222635	9.04741	1.46401e-19	1.63858e-18	53.2851	0.289763	0.22912	1.26468	0.205988	0.293751	53.2851	-1.00511	0.302267	-3.32525	0.000883403	0.00928374	1.96497	1.00916
WBGene00000180	arc-1	ZK1320.6	19.3429	4.49445	0.183828	24.4492	5.13081e-132	7.81631e-132	19.3429	-0.25995	0.260849	-0.996555	0.318981	1	19.3429	0.788972	0.356328	2.21418	0.0268166	0.0370964	19.3429	-0.734546	0.313435	-2.34353	0.0191021	0.0397598	19.3429	-0.0771581	0.462017	-0.167003	0.867368	0.934388	0.529022	0.711814
WBGene00000181	ard-1	F01G4.2	92.484	6.24954	0.111436	56.082	0	0	92.484	0.337779	0.154991	2.17934	0.0293061	0.792078	92.484	0.24543	0.17755	1.38232	0.166874	0.200015	92.484	0.238934	0.164061	1.45638	0.145289	0.220109	92.484	-0.600788	0.248815	-2.4146	0.0157525	0.0753355	0.583209	-0.355357
WBGene00000182	arf-1.2	B0336.2	201.006	7.5942	0.108348	70.0908	0	0	201.006	0.114915	0.152582	0.753138	0.451367	0.99478	201.006	0.987563	0.158096	6.24661	4.19463e-10	1.84232e-09	201.006	-0.548621	0.157259	-3.48864	0.000485477	0.00160673	201.006	-0.431836	0.2216	-1.94872	0.0513291	0.171007	1.10248	0.555727
WBGene00000183	arf-3	F57H12.1	215.29	7.50431	0.0873509	85.91	0	0	215.29	0.165653	0.122549	1.35172	0.176465	0.978652	215.29	-0.0549406	0.129731	-0.423495	0.671934	0.703555	215.29	0.439023	0.123268	3.56155	0.000368678	0.00125619	215.29	-0.410574	0.187665	-2.18781	0.0286837	0.114095	0.110712	-0.465514
WBGene00000184	arf-6	Y116A8C.12	10.5549	3.25636	0.303946	10.7136	8.78552e-27	9.33524e-27	10.5549	-0.218758	0.430381	-0.508289	0.611251	1	10.5549	-0.594012	0.514707	-1.15408	0.248468	0.289455	10.5549	0.542562	0.438537	1.23721	0.21601	0.304982	10.5549	0.463485	0.716515	0.64686	0.517722	1	-0.81277	-0.130527
WBGene00000186	ark-1	C01C7.1	51.8927	6.06302	0.130157	46.5825	0	0	51.8927	-0.306319	0.184781	-1.65774	0.0973693	0.954102	51.8927	-1.46577	0.268053	-5.46821	4.54602e-08	1.56048e-07	51.8927	0.0279825	0.192001	0.145742	0.884125	0.915309	51.8927	1.24712	0.348956	3.57385	0.000351775	0.00462627	-1.77209	-0.218657
WBGene00000187	arl-1	F54C9.10	34.2312	5.25806	0.193694	27.1463	2.80298e-162	4.749e-162	34.2312	-0.424413	0.27566	-1.53963	0.123652	0.965307	34.2312	-0.226479	0.308318	-0.734562	0.462606	0.507466	34.2312	0.060495	0.279437	0.216489	0.828607	0.874792	34.2312	0.336533	0.438399	0.767642	0.4427	0.652928	-0.650892	0.110054
WBGene00000189	arl-5	ZK632.8	19.3537	4.18743	0.231057	18.1229	2.10215e-73	2.6116e-73	19.3537	-0.157376	0.326415	-0.482134	0.629711	1	19.3537	-2.26807	0.499471	-4.54094	5.60031e-06	1.40521e-05	19.3537	0.718571	0.326948	2.19781	0.0279625	0.0553183	19.3537	2.13425	0.619176	3.44692	0.000567009	0.00669725	-2.42544	-0.133816
WBGene00000192	arl-8	Y57G11C.13	83.8597	6.4259	0.13026	49.3315	0	0	83.8597	0.0679601	0.183177	0.371007	0.710632	0.99478	83.8597	-0.699894	0.212351	-3.29593	0.000980979	0.00172741	83.8597	0.228502	0.185617	1.23104	0.218308	0.307404	83.8597	0.277992	0.295691	0.940145	0.347143	0.571887	-0.631934	-0.421902
WBGene00000196	aars-1	W02B12.6	28.3325	5.50981	0.155283	35.4824	9.17793e-276	2.26368e-275	28.3325	-0.0288107	0.218549	-0.131827	0.895121	0.995157	28.3325	-0.139834	0.345729	-0.404461	0.685874	0.716626	28.3325	-1.22684	0.26632	-4.60662	4.09265e-06	2.20997e-05	28.3325	0.362056	0.434424	0.833417	0.404609	0.622483	-0.168645	0.222222
WBGene00000197	aars-2	F28H1.3	157.05	7.13175	0.0853554	83.5536	0	0	157.05	0.0538738	0.119786	0.449751	0.65289	0.99478	157.05	0.172615	0.139103	1.24091	0.214638	0.252795	157.05	0.0719832	0.126641	0.568403	0.569761	0.657629	157.05	0.0338161	0.19013	0.177858	0.858835	0.929423	0.226489	0.206431
WBGene00000198	art-1	C15F1.6	139.324	7.00133	0.123392	56.7408	0	0	139.324	0.0399908	0.173844	0.230038	0.818062	0.99478	139.324	-0.142223	0.177498	-0.801268	0.422977	0.468164	139.324	0.359945	0.171791	2.09526	0.0361482	0.068839	139.324	-0.43915	0.261553	-1.67901	0.0931496	0.253438	-0.102232	-0.581373
WBGene00000199	arx-1	Y71F9AL.16	45.8981	5.49244	0.17162	32.0035	9.74185e-225	2.0203e-224	45.8981	-0.234738	0.243026	-0.965898	0.334095	0.99478	45.8981	0.158873	0.265298	0.598846	0.549275	0.588299	45.8981	0.0917823	0.248544	0.36928	0.711919	0.783753	45.8981	-0.0252792	0.377902	-0.0668935	0.946666	0.974186	-0.0758651	0.133594
WBGene00000200	arx-2	K07C5.1	74.6612	6.05382	0.160625	37.6891	0	0	74.6612	-0.0225212	0.226438	-0.0994585	0.920774	0.995166	74.6612	-0.966189	0.242229	-3.98875	6.64232e-05	0.00014124	74.6612	0.723204	0.221261	3.26855	0.00108099	0.00323815	74.6612	0.366747	0.347692	1.0548	0.291515	0.517429	-0.98871	-0.599443
WBGene00000201	arx-3	Y79H2A.6	83.7496	6.29866	0.139833	45.0441	0	0	83.7496	0.033042	0.196834	0.167867	0.866688	0.99478	83.7496	-0.231741	0.214981	-1.07796	0.281051	0.323535	83.7496	0.19938	0.198932	1.00225	0.316224	0.415278	83.7496	0.223246	0.301444	0.740591	0.458942	0.66495	-0.198699	-0.00849495
WBGene00000203	arx-5	Y37D8A.1	29.5431	4.2729	0.212437	20.1138	5.5926e-90	7.35492e-90	29.5431	0.190434	0.296378	0.642538	0.520524	0.99478	29.5431	-0.29756	0.314279	-0.946801	0.34374	0.387429	29.5431	1.09152	0.295041	3.69956	0.000215977	0.000780922	29.5431	-0.490258	0.463526	-1.05767	0.290206	0.516094	-0.107126	-0.787818
WBGene00000204	arx-6	C35D10.16	41.2072	5.42633	0.146872	36.9459	8.46715e-299	2.23941e-298	41.2072	0.0765787	0.205802	0.3721	0.709819	0.99478	41.2072	-0.668131	0.262222	-2.54796	0.0108354	0.0160629	41.2072	0.285309	0.215697	1.32273	0.185925	0.270254	41.2072	-0.0786952	0.367514	-0.214129	0.830447	0.911121	-0.591552	-0.746826
WBGene00000205	arx-7	M01B12.3	25.7825	4.67603	0.168223	27.7967	4.76091e-170	8.26335e-170	25.7825	-0.062792	0.236507	-0.265497	0.790627	0.99478	25.7825	-1.57989	0.348	-4.5399	5.62797e-06	1.41114e-05	25.7825	0.677008	0.243558	2.77966	0.00544166	0.0133458	25.7825	0.888635	0.4588	1.93687	0.0527614	0.174177	-1.64268	-0.691254
WBGene00000206	asb-1	F35G12.10	120.032	7.01145	0.0919848	76.224	0	0	120.032	0.268605	0.128439	2.09131	0.0365007	0.811344	120.032	-0.801802	0.165641	-4.84059	1.29455e-06	3.57892e-06	120.032	0.145056	0.134797	1.07611	0.281879	0.378383	120.032	0.108654	0.225097	0.4827	0.629309	0.793156	-0.533197	-0.693148
WBGene00000207	asb-2	F02E8.1	227.857	6.96936	0.112749	61.8129	0	0	227.857	0.0256596	0.158758	0.161627	0.871599	0.99478	227.857	1.83227	0.154513	11.8584	1.94724e-32	5.49019e-31	227.857	0.0707197	0.161338	0.438332	0.661146	0.739534	227.857	-1.04779	0.222217	-4.71515	2.41528e-06	0.000103723	1.85793	0.78448
WBGene00000208	trip-4	Y53F4B.15	61.2935	5.31789	0.134832	39.4409	0	0	61.2935	0.0763058	0.188434	0.404948	0.685516	0.99478	61.2935	-0.00502418	0.204541	-0.0245631	0.980403	0.983198	61.2935	0.928345	0.19115	4.85663	1.194e-06	7.15918e-06	61.2935	-0.388694	0.2975	-1.30654	0.191371	0.402468	0.0712816	-0.393718
WBGene00000209	asg-1	K07A12.3	132.916	6.71923	0.103783	64.743	0	0	132.916	0.26118	0.145009	1.80112	0.0716835	0.922535	132.916	-0.509665	0.161802	-3.14993	0.00163309	0.0027758	132.916	0.646269	0.14626	4.41863	9.93285e-06	4.90467e-05	132.916	0.0910493	0.226718	0.401597	0.687981	0.830663	-0.248485	-0.418615
WBGene00000210	asg-2	C53B7.4	91.5349	5.95568	0.154748	38.4864	0	0	91.5349	-0.0317465	0.218088	-0.145568	0.884263	0.995157	91.5349	2.24318	0.228619	9.81186	1.00108e-22	1.37966e-21	91.5349	-0.608017	0.235111	-2.58609	0.00970717	0.0219488	91.5349	-1.13777	0.313357	-3.6309	0.000282435	0.00396149	2.21144	1.10541
WBGene00000211	asm-1	B0252.2	18.3698	4.99883	0.263732	18.9542	4.07753e-80	5.18072e-80	18.3698	-0.359296	0.374068	-0.960509	0.336799	1	18.3698	0.836766	0.474615	1.76304	0.0778938	0.0994472	18.3698	-1.78036	0.430343	-4.13708	3.5176e-05	0.000154302	18.3698	0.209466	0.61423	0.341022	0.733087	0.857254	0.47747	1.04623
WBGene00000212	asm-2	ZK455.4	48.5606	5.08015	0.189716	26.7776	5.88848e-158	9.80351e-158	48.5606	-0.578378	0.271765	-2.12823	0.0333181	0.811344	48.5606	1.80656	0.274387	6.58397	4.58039e-11	2.26931e-10	48.5606	-0.116197	0.281451	-0.41285	0.679716	0.755729	48.5606	-1.17013	0.406782	-2.87655	0.00402049	0.0286385	1.22818	0.63643
WBGene00000213	asm-3	W03G1.7	64.0473	3.50299	0.291398	12.0214	2.74447e-33	2.97657e-33	64.0473	-0.927851	0.426378	-2.17612	0.0295463	0.792078	64.0473	4.01171	0.400366	10.0201	1.2438e-23	1.82301e-22	64.0473	0.0623434	0.435268	0.14323	0.886108	0.916506	64.0473	-0.453523	0.551932	-0.821702	0.411247	0.627649	3.08386	3.55818
WBGene00000214	asp-1	Y39B6A.20	3363.05	10.1094	0.109421	92.3899	0	0	3363.05	0.250008	0.15459	1.61723	0.105828	0.954102	3363.05	2.03275	0.134962	15.0617	2.89396e-51	1.90872e-49	3363.05	0.691141	0.145607	4.74663	2.0683e-06	1.1789e-05	3363.05	-1.03499	0.204992	-5.04893	4.44295e-07	2.78465e-05	2.28276	0.997761
WBGene00000215	asp-2	T18H9.2	915.73	8.75363	0.144793	60.4561	0	0	915.73	-0.00351304	0.204633	-0.0171675	0.986303	0.998148	915.73	1.92922	0.180512	10.6875	1.16476e-26	2.17825e-25	915.73	0.276756	0.194033	1.42634	0.153771	0.231111	915.73	-1.0539	0.27286	-3.8624	0.000112277	0.00202203	1.92571	0.875324
WBGene00000216	asp-3	H22K11.1	3232.99	9.85252	0.148465	66.3625	0	0	3232.99	0.22658	0.209832	1.07982	0.280223	0.99478	3232.99	2.78755	0.182916	15.2395	1.93414e-52	1.38713e-50	3232.99	0.330838	0.19749	1.67522	0.093892	0.153277	3232.99	-1.28593	0.277884	-4.62758	3.6997e-06	0.0001446	3.01413	1.50162
WBGene00000217	asp-4	R12H7.2	2127.85	8.18855	0.115192	71.0864	0	0	2127.85	0.0206446	0.162622	0.126948	0.898981	0.995157	2127.85	2.52549	0.140819	17.9343	6.36216e-72	9.21516e-70	2127.85	1.61601	0.153185	10.5494	5.11047e-26	1.88755e-24	2127.85	-0.756234	0.214273	-3.52931	0.000416649	0.00527023	2.54614	1.76926
WBGene00000218	asp-5	F21F8.3	1151.55	8.61163	0.0961237	89.589	0	0	1151.55	0.157807	0.135535	1.16433	0.244292	0.993234	1151.55	2.01851	0.120935	16.6909	1.52658e-62	1.54477e-60	1151.55	0.637965	0.12999	4.9078	9.21019e-07	5.64143e-06	1151.55	-0.89117	0.18088	-4.92686	8.35619e-07	4.53407e-05	2.17632	1.12734
WBGene00000219	asp-6	F21F8.7	2329.96	9.30024	0.0959933	96.8843	0	0	2329.96	0.0536143	0.135574	0.395461	0.692503	0.99478	2329.96	1.94425	0.118523	16.404	1.7897e-60	1.63216e-58	2329.96	1.10376	0.128027	8.62128	6.621e-18	1.51892e-16	2329.96	-0.875499	0.179847	-4.86801	1.12726e-06	5.74985e-05	1.99787	1.06875
WBGene00000221	atf-5	T04C10.4	110.781	5.62465	0.125061	44.9754	0	0	110.781	-0.03263	0.175671	-0.185745	0.852644	0.99478	110.781	1.51803	0.174094	8.71959	2.79205e-18	2.77589e-17	110.781	0.652508	0.180582	3.61335	0.000302264	0.00105124	110.781	-0.79423	0.250037	-3.17645	0.00149089	0.0138665	1.4854	0.723797
WBGene00000223	atf-7	C07G2.2	126.997	6.77856	0.104005	65.1756	0	0	126.997	-0.00218162	0.146329	-0.014909	0.988105	0.998148	126.997	0.388916	0.158263	2.4574	0.0139948	0.0203223	126.997	0.181512	0.150912	1.20277	0.229066	0.320051	126.997	-0.501689	0.227398	-2.20621	0.0273691	0.110317	0.386735	-0.112772
WBGene00000224	atgp-1	F26D10.9	36.8135	4.22813	0.235564	17.949	4.8891e-72	6.04954e-72	36.8135	-0.13632	0.332577	-0.40989	0.681887	0.99478	36.8135	1.17577	0.324876	3.61912	0.000295605	0.000568952	36.8135	0.62832	0.334048	1.88092	0.0599822	0.106053	36.8135	-0.408755	0.469793	-0.870075	0.384259	0.607428	1.03945	0.767011
WBGene00000226	atl-1	T06E4.3	71.7109	6.58482	0.111951	58.8186	0	0	71.7109	0.0783689	0.157199	0.498532	0.618109	0.99478	71.7109	-0.818261	0.216857	-3.77327	0.000161124	0.000321422	71.7109	-0.297016	0.169062	-1.75685	0.0789429	0.13317	71.7109	0.139183	0.294409	0.472753	0.63639	0.797315	-0.739892	-0.679078
WBGene00000227	atm-1	Y48G1BL.2	48.1516	6.49955	0.161376	40.2759	0	0	48.1516	-0.282544	0.228565	-1.23616	0.216399	0.993234	48.1516	-0.327322	0.313631	-1.04365	0.296646	0.339267	48.1516	-1.55379	0.254333	-6.10927	1.00087e-09	1.03116e-08	48.1516	0.873965	0.402863	2.16939	0.0300534	0.11766	-0.609865	0.546643
WBGene00000228	atn-1	W04D2.1	83.8884	5.9265	0.139269	42.5543	0	0	83.8884	-0.38326	0.19819	-1.9338	0.0531375	0.877661	83.8884	1.63769	0.206631	7.92566	2.26932e-15	1.76387e-14	83.8884	-0.208345	0.208997	-0.996877	0.318824	0.418025	83.8884	-0.620508	0.290766	-2.13405	0.0328388	0.125734	1.25443	1.01718
WBGene00000229	atp-2	C34E10.6	1143.87	9.98356	0.0607844	164.245	0	0	1143.87	0.135155	0.0857296	1.57652	0.114906	0.955072	1143.87	0.843313	0.0812801	10.3754	3.20898e-25	5.42443e-24	1143.87	-0.134736	0.083939	-1.60516	0.108458	0.172385	1143.87	-0.897506	0.120357	-7.45704	8.84876e-14	5.2391e-10	0.978467	-0.0541928
WBGene00000230	atp-3	F27C1.7	396.516	8.14893	0.0913652	89.1908	0	0	396.516	0.0942514	0.128721	0.732213	0.464039	0.99478	396.516	0.584455	0.122509	4.7707	1.83588e-06	4.96399e-06	396.516	0.439837	0.125764	3.49732	0.000469952	0.00156115	396.516	-0.690661	0.181779	-3.79946	0.000145011	0.00247266	0.678707	-0.106206
WBGene00000231	atx-2	D2045.1	162.023	7.09296	0.121355	58.4482	0	0	162.023	0.197548	0.170608	1.15791	0.2469	0.993234	162.023	-0.022346	0.172459	-0.129573	0.896905	0.910462	162.023	0.355434	0.168756	2.1062	0.0351867	0.0671639	162.023	-0.260566	0.249879	-1.04277	0.297056	0.522533	0.175202	-0.282912
WBGene00000233	avr-15	R11G10.1	20.2775	3.7816	0.259015	14.5999	2.81089e-48	3.19398e-48	20.2775	0.150372	0.362075	0.415306	0.677918	0.99478	20.2775	1.2538	0.397444	3.15466	0.00160686	0.00273437	20.2775	-0.0232904	0.391932	-0.0594247	0.952614	0.967147	20.2775	-0.529499	0.539007	-0.98236	0.325922	0.551689	1.40417	0.7243
WBGene00000235	baf-1	B0464.7	168.568	6.56602	0.145964	44.984	0	0	168.568	0.324785	0.20487	1.58532	0.112893	0.955072	168.568	0.226611	0.192468	1.17739	0.239039	0.278998	168.568	0.997475	0.198102	5.03515	4.77471e-07	3.12335e-06	168.568	-0.573805	0.286443	-2.00321	0.0451546	0.156992	0.551395	-0.347195
WBGene00000236	bag-1	F57B10.11	29.0439	5.16144	0.162989	31.6675	4.35919e-220	8.87822e-220	29.0439	0.334341	0.226738	1.47457	0.140329	0.968704	29.0439	-0.711238	0.321165	-2.21456	0.0267904	0.037067	29.0439	-0.14917	0.249037	-0.598989	0.54918	0.640075	29.0439	-0.391153	0.444463	-0.880059	0.378828	0.601988	-0.376897	-1.10239
WBGene00000237	bam-2	Y71F9AR.1	16.0238	3.85369	0.243038	15.8563	1.2712e-56	1.48959e-56	16.0238	-0.134308	0.342964	-0.39161	0.695346	1	16.0238	1.81608	0.40876	4.44291	8.87499e-06	2.16226e-05	16.0238	-0.643994	0.400671	-1.60729	0.107991	0.171813	16.0238	-1.42667	0.570118	-2.50242	0.0123347	0.0633772	1.68177	0.389409
WBGene00000238	bar-1	C54D1.6	12.0824	3.8161	0.250703	15.2216	2.54238e-52	2.92806e-52	12.0824	-0.0563289	0.352777	-0.159672	0.873139	1	12.0824	1.31865	0.484954	2.71913	0.00654531	0.0100374	12.0824	-1.14852	0.443458	-2.58993	0.0095995	0.0217523	12.0824	-0.432368	0.606536	-0.712848	0.47594	1	1.26233	0.886287
WBGene00000239	bas-1	C05D2.4	17.8021	3.50217	0.260203	13.4594	2.71131e-41	3.01587e-41	17.8021	0.094472	0.363631	0.259802	0.795017	1	17.8021	2.21572	0.44377	4.99295	5.94641e-07	1.72666e-06	17.8021	-0.712434	0.441556	-1.61346	0.106644	0.17011	17.8021	-0.499323	0.537613	-0.928779	0.353004	0.577439	2.31019	1.7164
WBGene00000240	pah-1	K08F8.4	129.696	5.85328	0.125745	46.5487	0	0	129.696	-0.164085	0.177672	-0.923528	0.355732	0.99478	129.696	0.89283	0.16813	5.31037	1.09405e-07	3.53997e-07	129.696	1.10493	0.174166	6.34413	2.23692e-10	2.50366e-09	129.696	-0.497505	0.250736	-1.98418	0.0472362	0.161803	0.728745	0.395325
WBGene00000245	bca-1	T13C5.5	24.6062	4.31518	0.301622	14.3066	1.9912e-46	2.24873e-46	24.6062	0.185578	0.423836	0.437853	0.661493	0.99478	24.6062	2.11602	0.448188	4.72127	2.34374e-06	6.24574e-06	24.6062	-0.83809	0.457797	-1.8307	0.0671453	0.116296	24.6062	-1.59272	0.623773	-2.55337	0.0106687	0.0571381	2.3016	0.523298
WBGene00000247	bec-1	T19E7.3	34.3212	4.75796	0.188318	25.2655	7.64385e-141	1.20343e-140	34.3212	0.0289675	0.264356	0.109578	0.912744	0.995157	34.3212	-0.68229	0.306283	-2.22765	0.0259041	0.0359349	34.3212	0.717905	0.266697	2.69184	0.0071059	0.016749	34.3212	0.551759	0.422027	1.3074	0.191076	0.402416	-0.653322	-0.130531
WBGene00000249	bir-1	T27F2.3	28.4063	4.94377	0.173398	28.5111	8.52728e-179	1.52595e-178	28.4063	0.252128	0.241666	1.04329	0.296814	0.99478	28.4063	-1.45765	0.355412	-4.10129	4.10852e-05	9.04339e-05	28.4063	0.302248	0.254328	1.18842	0.23467	0.325733	28.4063	0.559701	0.465795	1.2016	0.229518	0.449974	-1.20552	-0.897948
WBGene00000250	bir-2	C50B8.2	39.9262	5.99594	0.211225	28.3865	2.97201e-177	5.28381e-177	39.9262	-0.240719	0.29893	-0.805268	0.420665	0.99478	39.9262	-1.98556	0.410074	-4.84196	1.28566e-06	3.55832e-06	39.9262	-0.516718	0.300932	-1.71706	0.0859682	0.142964	39.9262	1.85202	0.527128	3.51342	0.00044238	0.00551549	-2.22628	-0.133543
WBGene00000253	bli-3	F56C11.1	28.7988	5.69932	0.240684	23.6796	5.84722e-124	8.67686e-124	28.7988	-0.862805	0.343814	-2.50951	0.0120898	0.747418	28.7988	0.394393	0.383193	1.02923	0.303373	0.345889	28.7988	-1.24432	0.358082	-3.47495	0.000510949	0.00168349	28.7988	0.18106	0.549794	0.329324	0.741911	0.862546	-0.468413	0.575453
WBGene00000254	bli-4	K04F10.4	141.262	7.06435	0.110989	63.6489	0	0	141.262	0.0389353	0.156264	0.249163	0.803235	0.99478	141.262	-1.02288	0.173771	-5.88639	3.94714e-09	1.54436e-08	141.262	0.563243	0.15423	3.65196	0.000260243	0.000924239	141.262	0.494996	0.244654	2.02325	0.0430473	0.152329	-0.983949	-0.527888
WBGene00000257	bmk-1	F23B12.8	73.0477	6.96753	0.136789	50.9365	0	0	73.0477	-0.101231	0.193212	-0.523939	0.600321	0.99478	73.0477	-2.21932	0.294076	-7.54676	4.46225e-14	3.07774e-13	73.0477	-0.48863	0.19727	-2.47696	0.0132507	0.0288314	73.0477	1.0566	0.385541	2.74056	0.00613345	0.0384508	-2.32055	-1.16272
WBGene00000259	bpl-1	F13H8.10	27.1184	4.93708	0.217024	22.749	1.46694e-114	2.10332e-114	27.1184	0.0626598	0.305204	0.205305	0.837334	0.99478	27.1184	-0.210906	0.349954	-0.602668	0.54673	0.586082	27.1184	-0.0320819	0.31506	-0.101828	0.918893	0.941713	27.1184	-0.411757	0.502896	-0.818772	0.412917	0.628663	-0.148246	-0.622663
WBGene00000263	F23H11.5	F23H11.5	142.328	6.70517	0.11652	57.5454	0	0	142.328	0.190001	0.163423	1.16263	0.244978	0.993234	142.328	0.392916	0.166158	2.3647	0.0180444	0.0257126	142.328	0.455539	0.164066	2.77656	0.0054937	0.0134645	142.328	-0.618885	0.241657	-2.56101	0.0104369	0.0563738	0.582917	-0.225969
WBGene00000264	brc-1	C36A4.8	22.6754	5.26868	0.152784	34.4846	1.36706e-260	3.20283e-260	22.6754	-0.148492	0.215743	-0.688281	0.491276	0.99478	22.6754	-2.62343	0.59457	-4.41232	1.0227e-05	2.46806e-05	22.6754	-0.867943	0.257787	-3.3669	0.000760173	0.00237739	22.6754	2.77581	0.653187	4.24964	2.14113e-05	0.00055375	-2.77192	0.152382
WBGene00000265	brd-1	K04C2.4	27.4469	5.49001	0.205944	26.6578	1.45378e-156	2.4084e-156	27.4469	0.105957	0.289826	0.365588	0.714673	0.99478	27.4469	-1.09975	0.412842	-2.66385	0.00772519	0.0117396	27.4469	-0.842691	0.31092	-2.71032	0.00672193	0.0159713	27.4469	0.421159	0.547376	0.769414	0.441648	0.652344	-0.993792	-0.67859
WBGene00000266	bre-1	C53B4.7	24.7697	4.74804	0.195314	24.3097	1.54613e-130	2.34187e-130	24.7697	-0.270688	0.27703	-0.977107	0.328516	0.99478	24.7697	1.77005	0.359846	4.91891	8.70267e-07	2.47161e-06	24.7697	-1.28026	0.342436	-3.73867	0.000184995	0.00067954	24.7697	-0.378864	0.447108	-0.847365	0.396792	0.617695	1.49936	1.39119
WBGene00000268	bre-3	B0464.4	49.91	5.51463	0.132666	41.5678	0	0	49.91	0.0798545	0.185604	0.43024	0.667021	0.99478	49.91	-1.11101	0.237151	-4.68483	2.80199e-06	7.36856e-06	49.91	0.780767	0.189043	4.1301	3.62612e-05	0.000158189	49.91	0.105115	0.333628	0.315066	0.752712	0.867852	-1.03116	-1.0059
WBGene00000271	brf-1	F45E12.2	42.5146	5.98169	0.171398	34.8994	7.58097e-267	1.81584e-266	42.5146	0.0738429	0.2413	0.306021	0.759589	0.99478	42.5146	-2.07017	0.363201	-5.69978	1.19964e-08	4.40561e-08	42.5146	-0.240341	0.247549	-0.970883	0.331607	0.430563	42.5146	1.13869	0.467446	2.43598	0.0148513	0.072404	-1.99632	-0.931475
WBGene00000273	brp-1	Y79H2A.1	841.821	6.45774	0.0905475	71.3187	0	0	841.821	0.00483136	0.126919	0.0380665	0.969635	0.998148	841.821	1.78559	0.103917	17.1829	3.56742e-66	4.11758e-64	841.821	2.49713	0.118184	21.1291	4.30014e-99	3.52946e-96	841.821	-0.240542	0.162506	-1.48021	0.138817	0.328487	1.79042	1.54505
WBGene00000274	btf-1	F15D4.1	44.6412	6.18525	0.148722	41.5893	0	0	44.6412	-0.151904	0.210172	-0.722763	0.469826	0.99478	44.6412	-0.483001	0.280942	-1.71922	0.0855742	0.108484	44.6412	-0.804561	0.228151	-3.52644	0.00042118	0.001411	44.6412	-0.206002	0.398601	-0.516813	0.605287	0.776074	-0.634905	-0.689003
WBGene00000275	bub-1	R06C7.8	89.6843	7.12548	0.131983	53.9878	0	0	89.6843	0.0601415	0.186042	0.323268	0.746492	0.99478	89.6843	-1.53367	0.246854	-6.21287	5.20263e-10	2.25804e-09	89.6843	-0.506554	0.190013	-2.6659	0.00767831	0.0179436	89.6843	0.746866	0.330309	2.26111	0.0237523	0.100088	-1.47353	-0.786808
WBGene00000276	byn-1	F57B9.5	104.722	6.21053	0.108505	57.2374	0	0	104.722	0.128913	0.151681	0.849895	0.395383	0.99478	104.722	0.437431	0.164744	2.65521	0.00792585	0.0120222	104.722	0.488184	0.157402	3.10152	0.00192531	0.00535476	104.722	-0.457079	0.233818	-1.95485	0.050601	0.169421	0.566344	-0.019648
WBGene00000277	cab-1	C23H4.1	142.225	5.71747	0.15058	37.9696	0	0	142.225	-0.142691	0.212682	-0.670911	0.502277	0.99478	142.225	1.92861	0.1977	9.75524	1.75183e-22	2.36577e-21	142.225	0.711047	0.210829	3.37262	0.00074456	0.00233647	142.225	-0.970521	0.291098	-3.334	0.000856055	0.0090648	1.78592	0.958091
WBGene00000281	cah-3	K05G3.3	67.7477	4.44399	0.159884	27.7951	4.97697e-170	8.63634e-170	67.7477	0.0711801	0.222677	0.319656	0.749229	0.99478	67.7477	2.02524	0.215163	9.41259	4.84041e-21	5.91989e-20	67.7477	0.905231	0.231068	3.91759	8.94374e-05	0.000352548	67.7477	-1.4315	0.314449	-4.55239	5.30404e-06	0.00018857	2.09642	0.593743
WBGene00000282	cah-4	R01E6.3	112.735	5.58486	0.114769	48.6618	0	0	112.735	-0.0536198	0.161136	-0.332762	0.739314	0.99478	112.735	1.67757	0.164926	10.1717	2.65302e-24	4.13457e-23	112.735	0.539433	0.170302	3.16751	0.00153749	0.0043953	112.735	-0.573446	0.228935	-2.50484	0.0122506	0.0631313	1.62395	1.10412
WBGene00000283	cah-5	R173.1	54.3545	4.16624	0.179636	23.1927	5.39886e-119	7.8553e-119	54.3545	0.307269	0.24749	1.24154	0.214405	0.992277	54.3545	2.84235	0.272205	10.442	1.59479e-25	2.77193e-24	54.3545	0.00704959	0.287366	0.0245318	0.980428	0.986572	54.3545	-1.28659	0.34526	-3.72644	0.000194204	0.00299299	3.14962	1.55576
WBGene00000286	cal-2	C18E9.1	12.1766	3.80949	0.350464	10.8698	1.60483e-27	1.70992e-27	12.1766	-0.669397	0.501421	-1.335	0.181876	1	12.1766	0.76724	0.597138	1.28486	0.19884	0.235202	12.1766	-1.12456	0.550934	-2.04119	0.0412317	0.076952	12.1766	1.42299	0.758011	1.87726	0.0604819	1	0.0978423	2.19023
WBGene00000289	cam-1	C01G6.8	52.6742	6.30913	0.216515	29.1394	1.13812e-186	2.09501e-186	52.6742	-0.137885	0.306067	-0.450507	0.652345	0.99478	52.6742	-0.867321	0.333866	-2.59781	0.00938201	0.0140835	52.6742	-0.477667	0.303106	-1.57591	0.115047	0.181205	52.6742	0.199879	0.480194	0.416245	0.677231	0.823028	-1.00521	-0.667442
WBGene00000292	cap-1	D2024.6	78.7354	6.16985	0.132315	46.63	0	0	78.7354	-0.0216447	0.186307	-0.116177	0.907512	0.995157	78.7354	-0.142192	0.204475	-0.695399	0.486805	0.530926	78.7354	0.336854	0.189033	1.78199	0.074751	0.126968	78.7354	-0.0734945	0.291473	-0.252149	0.800926	0.8942	-0.163837	-0.215686
WBGene00000293	cap-2	M106.5	80.5968	6.21876	0.127218	48.8826	0	0	80.5968	-0.0426999	0.179194	-0.238288	0.811658	0.99478	80.5968	0.139462	0.198792	0.701548	0.482961	0.527133	80.5968	0.144529	0.1849	0.781659	0.434415	0.533592	80.5968	-0.133932	0.280625	-0.477262	0.633176	0.795414	0.0967626	0.00553065
WBGene00000294	cas-1	F41G4.2	95.0641	6.07244	0.113945	53.2927	0	0	95.0641	-0.36197	0.162337	-2.22974	0.0257646	0.792078	95.0641	1.51358	0.179626	8.4263	3.56757e-17	3.23755e-16	95.0641	-0.223337	0.17738	-1.25909	0.207998	0.29599	95.0641	-0.221653	0.242067	-0.915669	0.359841	0.583274	1.15161	1.29193
WBGene00000298	cat-4	F32G8.6	64.6441	6.21484	0.232066	26.7805	5.45301e-158	9.08261e-158	64.6441	0.342451	0.326911	1.04753	0.294853	0.99478	64.6441	2.64661	0.363386	7.28318	3.2605e-13	2.06918e-12	64.6441	-2.34596	0.368915	-6.35908	2.02968e-10	2.28761e-09	64.6441	-1.00153	0.464959	-2.15402	0.0312386	0.120872	2.98906	1.64507
WBGene00000301	cav-1	T13F2.8	79.1034	7.65336	0.163847	46.7104	0	0	79.1034	-0.0750288	0.231556	-0.32402	0.745923	0.99478	79.1034	-2.43394	0.520968	-4.67195	2.98359e-06	7.81276e-06	79.1034	-2.92966	0.265352	-11.0407	2.43228e-28	1.05072e-26	79.1034	2.74587	0.582582	4.71327	2.43767e-06	0.000104042	-2.50896	0.311935
WBGene00000302	cav-2	C56A3.7	11.5786	2.72989	0.331099	8.24494	1.65249e-16	1.70702e-16	11.5786	-0.423299	0.47396	-0.89311	0.371798	1	11.5786	1.17901	0.485813	2.42689	0.0152289	0.0219934	11.5786	0.4967	0.487196	1.01951	0.307963	0.40689	11.5786	-0.259931	0.69534	-0.373818	0.70854	1	0.755715	0.919083
WBGene00000366	cbp-1	R10E11.1	163.714	7.88865	0.106733	73.9105	0	0	163.714	-0.0364988	0.150665	-0.242251	0.808586	0.99478	163.714	-0.358383	0.170908	-2.09694	0.0359988	0.0488201	163.714	-0.67673	0.154084	-4.39195	1.12338e-05	5.47389e-05	163.714	0.169255	0.238762	0.708885	0.478396	0.682707	-0.394882	-0.189128
WBGene00000367	cca-1	C54D2.5	21.961	5.2219	0.152776	34.1801	4.77276e-256	1.09936e-255	21.961	-0.543202	0.219537	-2.4743	0.0133496	0.750288	21.961	0.280898	0.345618	0.812741	0.416367	0.46147	21.961	-1.24268	0.275528	-4.5102	6.47671e-06	3.35508e-05	21.961	0.391645	0.444178	0.88173	0.377923	0.601237	-0.262304	0.672543
WBGene00000369	ccf-1	Y56A3A.20	80.5071	6.51322	0.156236	41.6883	0	0	80.5071	0.306793	0.219491	1.39775	0.162189	0.973531	80.5071	-0.817872	0.24311	-3.3642	0.000767647	0.00137569	80.5071	0.0793717	0.218979	0.362463	0.717006	0.787681	80.5071	-0.191949	0.347547	-0.552296	0.580746	0.75731	-0.511079	-1.00982
WBGene00000370	ccg-1	Y73F8A.6	219.305	5.66379	0.124716	45.4134	0	0	219.305	0.0198805	0.174847	0.113702	0.909474	0.995157	219.305	1.77147	0.157935	11.2165	3.38557e-29	7.44321e-28	219.305	1.32004	0.171498	7.69715	1.39135e-14	2.47065e-13	219.305	-0.300557	0.231904	-1.29604	0.194961	0.407925	1.79135	1.47091
WBGene00000371	cox-5B	F26E4.9	281.324	7.58589	0.111573	67.9905	0	0	281.324	0.17559	0.157044	1.11809	0.263529	0.993234	281.324	0.596351	0.14906	4.00074	6.31449e-05	0.000134891	281.324	0.470128	0.153357	3.06558	0.00217245	0.0059547	281.324	-0.648985	0.22044	-2.94405	0.00323951	0.0244439	0.771941	-0.0526343
WBGene00000373	cyp-14A5	F08F3.7	153.398	3.31135	0.221695	14.9365	1.9063e-50	2.18289e-50	153.398	-0.268304	0.315292	-0.85097	0.394786	0.99478	153.398	1.17378	0.226818	5.175	2.27913e-07	7.03256e-07	153.398	3.77533	0.275034	13.7268	7.01839e-43	6.73309e-41	153.398	-0.120562	0.38881	-0.31008	0.7565	0.870066	0.905479	1.05322
WBGene00000375	cyp-44A1	ZK177.5	41.9992	5.45506	0.186294	29.2819	1.76192e-188	3.25953e-188	41.9992	0.0526805	0.262118	0.20098	0.840714	0.99478	41.9992	-0.0207554	0.287886	-0.0720958	0.942526	0.950503	41.9992	0.0441181	0.267902	0.16468	0.869196	0.905479	41.9992	-0.567637	0.419103	-1.35441	0.175606	0.381888	0.0319251	-0.588392
WBGene00000376	ccr-4	ZC518.3	83.5186	6.85704	0.133954	51.1895	0	0	83.5186	0.0827119	0.188654	0.438433	0.661073	0.99478	83.5186	-1.51087	0.238495	-6.33501	2.37321e-10	1.07684e-09	83.5186	-0.0715816	0.18998	-0.376785	0.706333	0.77934	83.5186	0.183502	0.335011	0.547749	0.583864	0.760094	-1.42816	-1.32737
WBGene00000377	cct-1	T05C12.7	207.644	7.56628	0.0984939	76.8197	0	0	207.644	0.287445	0.138211	2.07975	0.0375486	0.811344	207.644	-1.27566	0.152086	-8.38774	4.95565e-17	4.45345e-16	207.644	0.718085	0.135362	5.30493	1.12714e-07	8.35963e-07	207.644	0.164286	0.216726	0.758038	0.448428	0.656175	-0.988214	-1.11137
WBGene00000378	cct-2	T21B10.7	170.934	7.4175	0.091107	81.4152	0	0	170.934	0.248461	0.12764	1.94658	0.0515853	0.87071	170.934	-0.9384	0.151712	-6.18539	6.19505e-10	2.66528e-09	170.934	0.319993	0.129311	2.47459	0.0133388	0.0289805	170.934	0.321096	0.208638	1.53901	0.123802	0.305206	-0.689939	-0.617304
WBGene00000379	cct-4	K01C8.10	219.657	7.57044	0.118809	63.7194	0	0	219.657	0.323545	0.167073	1.93655	0.0528001	0.877661	219.657	-0.782294	0.167652	-4.66618	3.06854e-06	8.00683e-06	219.657	0.605031	0.161981	3.73519	0.000187573	0.000687304	219.657	-0.0213812	0.244115	-0.0875866	0.930205	0.967619	-0.458749	-0.803675
WBGene00000380	cct-5	C07G2.3	227.107	7.80542	0.0969655	80.4968	0	0	227.107	0.22634	0.136305	1.66054	0.0968068	0.954102	227.107	0.0809275	0.1442	0.561218	0.574649	0.611975	227.107	-0.130631	0.137884	-0.947395	0.343437	0.442907	227.107	-0.0786061	0.203039	-0.387148	0.698647	0.83734	0.307267	0.00232149
WBGene00000381	cct-6	F01F1.8	116.616	6.87273	0.0931755	73.7611	0	0	116.616	0.303646	0.129862	2.33823	0.0193753	0.769638	116.616	-0.507637	0.162325	-3.12728	0.00176429	0.00298029	116.616	0.176969	0.137016	1.29159	0.196498	0.282399	116.616	-0.197632	0.224229	-0.881381	0.378112	0.6014	-0.203991	-0.705268
WBGene00000382	cdc-6	C43E11.10	48.7376	5.67019	0.201223	28.1787	1.06768e-174	1.88187e-174	48.7376	0.00499238	0.283705	0.017597	0.98596	0.998148	48.7376	-1.2914	0.313878	-4.11433	3.88309e-05	8.58043e-05	48.7376	0.523168	0.277534	1.88506	0.0594218	0.105238	48.7376	0.482336	0.445865	1.0818	0.279342	0.505143	-1.2864	-0.809061
WBGene00000383	cdc-14	C17G10.4	110.441	7.27611	0.122508	59.3931	0	0	110.441	0.00511188	0.172784	0.0295853	0.976398	0.998148	110.441	-0.810045	0.201177	-4.02654	5.66041e-05	0.00012219	110.441	-0.320353	0.174956	-1.83105	0.0670934	0.116233	110.441	-0.0318744	0.286913	-0.111094	0.911542	0.9578	-0.804933	-0.841919
WBGene00000386	cdc-25.1	K06A5.7	111.768	7.15382	0.101207	70.6847	0	0	111.768	-0.0718937	0.14275	-0.503633	0.614519	0.99478	111.768	-2.59456	0.225737	-11.4937	1.41831e-30	3.53956e-29	111.768	0.347509	0.143169	2.42726	0.0152131	0.0324984	111.768	1.58032	0.285915	5.52725	3.25287e-08	3.42882e-06	-2.66646	-1.01424
WBGene00000390	cdc-42	R07G3.1	150.244	6.81292	0.133402	51.0705	0	0	150.244	0.101631	0.187793	0.541183	0.588382	0.99478	150.244	-0.359624	0.187833	-1.91459	0.0555449	0.0729051	150.244	0.661007	0.183204	3.60803	0.000308529	0.00107101	150.244	0.321058	0.270878	1.18525	0.235919	0.457143	-0.257993	-0.0385659
WBGene00000392	cdd-2	F49E8.4	32.244	5.30383	0.158395	33.4848	8.02975e-246	1.78072e-245	32.244	0.0317791	0.222385	0.142901	0.886368	0.995157	32.244	0.479596	0.300692	1.59497	0.110719	0.137274	32.244	-0.806458	0.260515	-3.09563	0.00196396	0.00544706	32.244	-0.0450174	0.387796	-0.116085	0.907585	0.955519	0.511375	0.434578
WBGene00000393	cdf-1	C15B12.7	32.0459	5.16966	0.228887	22.5861	5.94217e-113	8.47226e-113	32.0459	-0.3787	0.324945	-1.16543	0.243846	0.993234	32.0459	1.16808	0.365581	3.19512	0.00139773	0.00239894	32.0459	-1.04731	0.352705	-2.96937	0.00298411	0.00787273	32.0459	0.395294	0.482729	0.818873	0.412859	0.628663	0.789375	1.56337
WBGene00000396	cdh-4	F25F2.2	149.506	8.34716	0.104972	79.5178	0	0	149.506	-0.35556	0.148719	-2.39082	0.0168107	0.759094	149.506	-0.488875	0.192746	-2.53637	0.0112008	0.0165546	149.506	-1.74427	0.159671	-10.9242	8.83138e-28	3.60428e-26	149.506	0.336561	0.264809	1.27096	0.203743	0.419518	-0.844435	-0.152314
WBGene00000403	casy-1	B0034.3	32.3027	4.5886	0.151545	30.2788	2.18232e-201	4.21019e-201	32.3027	-0.207625	0.214551	-0.967719	0.333185	0.99478	32.3027	1.0574	0.260922	4.05254	5.06654e-05	0.000109852	32.3027	0.00481004	0.244213	0.0196961	0.984286	0.989106	32.3027	-0.210186	0.346536	-0.606535	0.54416	0.732248	0.849773	0.847212
WBGene00000405	cdk-1	T05G5.3	137.637	7.35357	0.146587	50.1652	0	0	137.637	0.154512	0.206676	0.747601	0.454701	0.99478	137.637	-2.59018	0.243392	-10.642	1.90008e-26	3.47424e-25	137.637	0.545427	0.198789	2.74375	0.00607411	0.0147065	137.637	0.946703	0.336758	2.81122	0.00493535	0.0329829	-2.43566	-1.64347
WBGene00000407	cdk-5	T27E9.3	58.1846	5.51618	0.15677	35.1863	3.23563e-271	7.87273e-271	58.1846	0.179764	0.219452	0.81915	0.412701	0.99478	58.1846	-1.70308	0.264763	-6.43246	1.25553e-10	5.86628e-10	58.1846	1.13708	0.215141	5.28531	1.25495e-07	9.21505e-07	58.1846	0.669799	0.365127	1.83443	0.0665907	0.203995	-1.52331	-1.03328
WBGene00000408	cdk-7	Y39G10AL.3	58.6792	5.73888	0.141543	40.545	0	0	58.6792	0.130342	0.19829	0.657327	0.51097	0.99478	58.6792	-1.70169	0.251144	-6.77576	1.23753e-11	6.54845e-11	58.6792	0.952607	0.196473	4.84853	1.24377e-06	7.40142e-06	58.6792	0.475421	0.34759	1.36776	0.171386	0.376844	-1.57135	-1.22627
WBGene00000409	cdk-8	F39H11.3	45.843	5.84944	0.1574	37.1628	2.72163e-302	7.258e-302	45.843	0.150361	0.220946	0.680531	0.496168	0.99478	45.843	-0.585349	0.265431	-2.20528	0.0274347	0.037845	45.843	-0.0149493	0.228399	-0.0654525	0.947814	0.96373	45.843	-0.980199	0.404361	-2.42407	0.0153478	0.0739437	-0.434988	-1.56555
WBGene00000410	cdk-9	H25P06.2	24.899	4.91555	0.176362	27.8719	5.85255e-171	1.01916e-170	24.899	-0.0966736	0.248592	-0.388884	0.697362	0.99478	24.899	-0.518913	0.334843	-1.54972	0.121209	0.149278	24.899	-0.112121	0.268814	-0.417095	0.676609	0.753247	24.899	0.350737	0.449942	0.779516	0.435676	0.647649	-0.615586	-0.168176
WBGene00000411	cdl-1	R06F6.1	110.286	7.28389	0.13653	53.3502	0	0	110.286	0.149119	0.192383	0.775114	0.438272	0.99478	110.286	-2.19672	0.249456	-8.80602	1.2967e-18	1.31576e-17	110.286	-0.0684132	0.19013	-0.359824	0.718979	0.789019	110.286	0.897742	0.335805	2.6734	0.00750857	0.0446853	-2.0476	-1.29898
WBGene00000412	cdr-1	F35E8.11	22.3577	3.40373	0.204585	16.6372	3.74425e-62	4.45534e-62	22.3577	0.214849	0.281098	0.76432	0.444677	0.99478	22.3577	3.0753	0.397362	7.73931	9.99598e-15	7.31092e-14	22.3577	-0.851015	0.402261	-2.11558	0.0343807	0.0658637	22.3577	-1.00028	0.419144	-2.38649	0.0170102	0.0791571	3.29015	2.07502
WBGene00000413	cdt-1	Y54E10A.15	32.6528	5.90735	0.165127	35.7745	2.75632e-280	6.88801e-280	32.6528	-0.0230835	0.232753	-0.0991763	0.920998	0.995166	32.6528	-1.44778	0.391302	-3.69992	0.000215672	0.000423377	32.6528	-1.0379	0.258956	-4.008	6.12351e-05	0.000251862	32.6528	0.764136	0.501892	1.52251	0.127881	0.311794	-1.47087	-0.683649
WBGene00000414	cec-1	ZK1236.2	34.3634	6.12935	0.251276	24.3929	2.03304e-131	3.09077e-131	34.3634	-0.0420454	0.354974	-0.118446	0.905714	0.995157	34.3634	0.739484	0.419218	1.76396	0.0777383	0.099283	34.3634	-2.23697	0.389651	-5.74096	9.41415e-09	8.47044e-08	34.3634	-1.16861	0.608259	-1.92124	0.0547012	0.178497	0.697439	-0.429129
WBGene00000415	ced-1	Y47H9C.4	104.075	6.60898	0.149355	44.25	0	0	104.075	-0.207504	0.211299	-0.982039	0.326081	0.99478	104.075	-0.763797	0.219073	-3.4865	0.000489385	0.000906036	104.075	0.499003	0.205768	2.42507	0.0153053	0.0326668	104.075	0.675425	0.314076	2.15052	0.0315143	0.121735	-0.971301	-0.0883717
WBGene00000416	ced-2	Y41D4B.13	28.4003	4.95426	0.188742	26.2489	7.35139e-152	1.2001e-151	28.4003	0.080996	0.264836	0.305835	0.75973	0.99478	28.4003	-2.01808	0.369367	-5.46362	4.6653e-08	1.59993e-07	28.4003	0.740945	0.264832	2.79779	0.00514536	0.0126823	28.4003	0.116438	0.52444	0.222024	0.824295	0.907951	-1.93708	-1.90164
WBGene00000417	ced-3	C48D1.2	48.6178	5.7605	0.14474	39.7991	0	0	48.6178	0.061068	0.203245	0.300465	0.763822	0.99478	48.6178	-2.09705	0.300585	-6.97655	3.02513e-12	1.72694e-11	48.6178	0.525091	0.205569	2.55432	0.0106394	0.0238668	48.6178	1.10059	0.390675	2.81715	0.0048452	0.0326312	-2.03598	-0.996459
WBGene00000419	ced-5	C02F4.1	85.8338	6.80314	0.118482	57.4191	0	0	85.8338	-0.0487542	0.167067	-0.291824	0.770421	0.99478	85.8338	-1.06797	0.209332	-5.10177	3.36486e-07	1.01371e-06	85.8338	-0.0166046	0.17072	-0.0972623	0.922518	0.944641	85.8338	0.141153	0.295171	0.478207	0.632503	0.795414	-1.11672	-0.926813
WBGene00000420	ced-6	F56D2.7	33.9209	4.92356	0.191124	25.7611	2.42208e-146	3.88447e-146	33.9209	0.19576	0.267393	0.732103	0.464106	0.99478	33.9209	-1.29851	0.322859	-4.02192	5.77259e-05	0.000124357	33.9209	0.822229	0.266836	3.0814	0.00206031	0.0056768	33.9209	0.342048	0.448823	0.762101	0.445999	0.655018	-1.10275	-0.956466
WBGene00000421	ced-7	C48B4.4	97.4992	7.1361	0.08578	83.1907	0	0	97.4992	-0.0324771	0.120706	-0.269059	0.787884	0.99478	97.4992	-0.113182	0.174693	-0.647892	0.517055	0.558649	97.4992	-0.807743	0.140105	-5.76525	8.15365e-09	7.46357e-08	97.4992	0.0934566	0.229407	0.407383	0.683727	0.82725	-0.145659	-0.0197257
WBGene00000424	ced-10	C09G12.8	11.8305	3.46145	0.270509	12.7961	1.72485e-37	1.8952e-37	11.8305	0.150663	0.377491	0.399115	0.689808	1	11.8305	-0.864975	0.493003	-1.7545	0.0793445	0.101159	11.8305	0.504096	0.394328	1.27837	0.201121	0.288034	11.8305	0.271697	0.669599	0.405761	0.684918	1	-0.714312	-0.593278
WBGene00000426	ced-12	Y106G6E.5	51.429	6.14535	0.164485	37.3611	1.67415e-305	4.50362e-305	51.429	-0.0619605	0.232112	-0.266943	0.789513	0.99478	51.429	-0.594822	0.272651	-2.18163	0.0291371	0.0400364	51.429	-0.280913	0.237643	-1.18208	0.237174	0.328645	51.429	-0.269002	0.395018	-0.680986	0.495881	0.695621	-0.656783	-0.863824
WBGene00000441	ceh-18	ZC64.3	11.0533	3.30624	0.274546	12.0426	2.12262e-33	2.30315e-33	11.0533	-0.166712	0.387871	-0.429812	0.667333	1	11.0533	0.245442	0.456673	0.537456	0.590952	0.627388	11.0533	0.271235	0.412232	0.657967	0.51056	0.604117	11.0533	-0.430723	0.658134	-0.654462	0.512814	1	0.0787306	-0.185281
WBGene00000443	ceh-20	F31E3.1	14.2129	3.8045	0.314181	12.1093	9.43523e-34	1.02542e-33	14.2129	-0.395009	0.446861	-0.883963	0.376716	1	14.2129	0.334781	0.492629	0.679579	0.496771	0.539733	14.2129	-0.143804	0.461801	-0.311399	0.755498	0.818428	14.2129	0.379517	0.683842	0.554977	0.57891	1	-0.060228	0.714298
WBGene00000444	ceh-21	T26C11.6	25.8267	5.53481	0.158516	34.9164	4.19385e-267	1.0065e-266	25.8267	-0.0744905	0.223445	-0.333373	0.738853	0.99478	25.8267	-1.50381	0.415194	-3.62195	0.000292388	0.000563347	25.8267	-0.893067	0.256899	-3.47634	0.000508312	0.00167555	25.8267	0.702423	0.533084	1.31766	0.187617	0.397939	-1.5783	-0.80139
WBGene00000458	ceh-37	C37E2.5	19.79	3.89971	0.252885	15.4209	1.18513e-53	1.37111e-53	19.79	-0.500993	0.362213	-1.38315	0.16662	1	19.79	1.85895	0.408393	4.55186	5.31739e-06	1.33832e-05	19.79	-0.569566	0.405553	-1.40442	0.160194	0.239109	19.79	-0.220824	0.5383	-0.410224	0.681642	0.825876	1.35795	1.63812
WBGene00000459	ceh-38	F22D3.1	47.1871	5.60527	0.163299	34.3251	3.31216e-258	7.69885e-258	47.1871	0.230441	0.228663	1.00778	0.313562	0.99478	47.1871	-1.21692	0.292424	-4.16147	3.16201e-05	7.08123e-05	47.1871	0.273217	0.233839	1.1684	0.242646	0.335347	47.1871	0.787747	0.387569	2.03253	0.0420996	0.149891	-0.986475	-0.429169
WBGene00000464	ceh-44	Y54F10AM.4	57.0159	6.44018	0.284547	22.6331	2.0477e-113	2.92636e-113	57.0159	0.200365	0.401729	0.498758	0.61795	0.99478	57.0159	-0.596219	0.405667	-1.46973	0.141636	0.172168	57.0159	-0.844753	0.392333	-2.15316	0.0313064	0.0607889	57.0159	0.0329137	0.587021	0.056069	0.955287	0.97971	-0.395854	-0.563305
WBGene00000465	cpg-1	C07G2.1	1498.1	10.4331	0.201883	51.6787	0	0	1498.1	0.16637	0.28545	0.582834	0.560005	0.99478	1498.1	-2.94487	0.252637	-11.6565	2.12542e-31	5.6073e-30	1498.1	1.13293	0.267287	4.23864	2.24882e-05	0.00010301	1498.1	1.33905	0.382363	3.50205	0.000461689	0.00567486	-2.7785	-1.60582
WBGene00000466	cel-1	C03D6.3	43.7742	5.66161	0.192032	29.4825	4.81975e-191	8.99077e-191	43.7742	0.0881529	0.270296	0.326135	0.744322	0.99478	43.7742	0.0036257	0.300238	0.0120761	0.990365	0.991439	43.7742	-0.290296	0.278173	-1.04358	0.296678	0.394849	43.7742	-0.229857	0.423656	-0.542556	0.587436	0.762407	0.0917786	-0.226231
WBGene00000467	cep-1	F52B5.5	35.4229	5.64918	0.18806	30.0392	3.02009e-198	5.77664e-198	35.4229	0.0205419	0.264943	0.0775332	0.938199	0.995931	35.4229	-1.32149	0.346548	-3.81331	0.000137121	0.0002766	35.4229	-0.185803	0.27155	-0.684232	0.493829	0.588258	35.4229	0.342413	0.477699	0.716795	0.4735	0.677668	-1.30095	-0.97908
WBGene00000472	cey-1	F33A8.3	250.212	8.02152	0.077325	103.738	0	0	250.212	-0.0674302	0.109073	-0.618214	0.536434	0.99478	250.212	0.658256	0.118432	5.55811	2.72707e-08	9.56091e-08	250.212	-0.305765	0.113903	-2.68443	0.00726529	0.0170733	250.212	-0.635653	0.169537	-3.74934	0.000177303	0.00286194	0.590826	0.0226028
WBGene00000473	cey-2	F46F11.2	736.066	9.82425	0.185159	53.0583	0	0	736.066	0.237168	0.261746	0.906099	0.364884	0.99478	736.066	-1.91409	0.236425	-8.09598	5.68072e-16	4.66779e-15	736.066	0.0973307	0.246052	0.395569	0.692423	0.766741	736.066	1.00023	0.354623	2.82056	0.00479403	0.0324436	-1.67692	-0.913859
WBGene00000474	cey-3	M01E11.5	361.593	8.59831	0.115734	74.2934	0	0	361.593	0.28455	0.163228	1.74327	0.0812858	0.949683	361.593	-2.09172	0.168771	-12.3938	2.82223e-35	9.51955e-34	361.593	0.523845	0.155799	3.36232	0.00077291	0.00241212	361.593	0.896199	0.240947	3.71948	0.00019963	0.00303984	-1.80717	-1.19552
WBGene00000475	cey-4	Y39A1C.3	486.192	8.2402	0.101306	81.3398	0	0	486.192	0.189546	0.142731	1.32799	0.18418	0.981054	486.192	0.481298	0.131455	3.66131	0.000250925	0.000488042	486.192	0.710225	0.137216	5.17597	2.26735e-07	1.58757e-06	486.192	-0.603079	0.196629	-3.06709	0.00216153	0.0180349	0.670843	-0.121782
WBGene00000479	cgh-1	C07H6.5	1765.96	10.4694	0.168297	62.2077	0	0	1765.96	0.194665	0.237938	0.818131	0.413282	0.99478	1765.96	-1.75815	0.209063	-8.40964	4.11258e-17	3.71389e-16	1765.96	1.06722	0.222917	4.78753	1.68844e-06	9.76703e-06	1765.96	0.856907	0.317456	2.69929	0.00694866	0.0421463	-1.56348	-0.901242
WBGene00000480	cgp-1	Y38C9A.2	110.775	6.42277	0.112816	56.9313	0	0	110.775	0.249591	0.157599	1.58371	0.11326	0.955072	110.775	-1.19564	0.181014	-6.60522	3.9693e-11	1.98117e-10	110.775	1.03332	0.155791	6.63275	3.29488e-11	4.13231e-10	110.775	0.252062	0.254851	0.989056	0.322636	0.547591	-0.946047	-0.943576
WBGene00000482	chd-3	T14G8.1	52.6188	6.74914	0.17749	38.0255	0	0	52.6188	-0.309068	0.251349	-1.22964	0.218833	0.993234	52.6188	-0.00497539	0.313613	-0.0158648	0.987342	0.988815	52.6188	-1.78491	0.272832	-6.54215	6.06391e-11	7.35535e-10	52.6188	0.163382	0.428402	0.381376	0.702924	0.839349	-0.314044	0.158407
WBGene00000485	che-3	F18C12.1	39.0536	6.58002	0.238341	27.6076	9.01228e-168	1.55364e-167	39.0536	-0.707581	0.338444	-2.09069	0.0365559	0.811344	39.0536	0.899883	0.417211	2.1569	0.0310133	0.0424565	39.0536	-2.88031	0.383519	-7.51023	5.90257e-14	9.79827e-13	39.0536	0.557382	0.542818	1.02683	0.3045	0.530119	0.192302	1.45727
WBGene00000496	chs-1	T25G3.2	189.465	7.74318	0.211941	36.5345	3.141e-292	8.14696e-292	189.465	0.285031	0.29929	0.952357	0.340916	0.99478	189.465	-2.62718	0.296226	-8.86885	7.3908e-19	7.64648e-18	189.465	0.611178	0.282842	2.16085	0.0307072	0.0598192	189.465	0.836013	0.431221	1.93871	0.0525364	0.17388	-2.34215	-1.79117
WBGene00000497	chs-2	F48A11.1	13.8565	4.70392	0.265536	17.7148	3.22362e-70	3.95892e-70	13.8565	-0.579023	0.378768	-1.5287	0.126339	1	13.8565	-0.288862	0.513411	-0.562634	0.573684	0.61134	13.8565	-1.22045	0.418019	-2.9196	0.00350486	0.00907799	13.8565	0.624375	0.690219	0.904605	0.365675	1	-0.867885	0.335513
WBGene00000498	chk-1	Y39H10A.7	66.9489	6.45785	0.202942	31.8211	3.30642e-222	6.78648e-222	66.9489	0.0188415	0.286474	0.0657702	0.947561	0.996752	66.9489	-1.53096	0.314196	-4.87262	1.10126e-06	3.07627e-06	66.9489	0.0467315	0.278882	0.167567	0.866924	0.904132	66.9489	0.568146	0.446251	1.27315	0.202963	0.418733	-1.51212	-0.962814
WBGene00000499	chk-2	Y60A3A.12	13.3344	3.7969	0.314112	12.0877	1.22641e-33	1.33188e-33	13.3344	0.0677606	0.441561	0.153457	0.878038	1	13.3344	-1.03366	0.549732	-1.8803	0.060067	0.0782566	13.3344	0.174552	0.451101	0.386947	0.698795	0.772639	13.3344	0.859438	0.733717	1.17135	0.241459	1	-0.965901	-0.174223
WBGene00000500	chn-1	T09B4.10	55.9284	6.00364	0.156572	38.3442	0	0	55.9284	0.0470522	0.220359	0.213525	0.830917	0.99478	55.9284	-0.900404	0.265755	-3.38809	0.000703803	0.00126774	55.9284	0.0599628	0.2244	0.267214	0.789305	0.845136	55.9284	0.371488	0.366767	1.01287	0.31112	0.536955	-0.853352	-0.528916
WBGene00000502	chp-1	Y110A7A.13	42.5515	5.82518	0.15319	38.0259	0	0	42.5515	-0.0310981	0.2158	-0.144107	0.885416	0.995157	42.5515	-0.1152	0.281963	-0.408564	0.68286	0.713983	42.5515	-0.682684	0.237677	-2.87232	0.00407475	0.0103473	42.5515	0.40464	0.369322	1.09563	0.273242	0.499546	-0.146298	0.28944
WBGene00000506	cic-1	H14E04.5	33.0676	5.17248	0.177346	29.1661	5.22567e-187	9.63124e-187	33.0676	0.0513233	0.249093	0.20604	0.836759	0.99478	33.0676	-0.0562718	0.304196	-0.184985	0.853241	0.870565	33.0676	-0.177271	0.266459	-0.665285	0.505868	0.599527	33.0676	-0.212565	0.422003	-0.503704	0.614469	0.783085	-0.00494854	-0.268836
WBGene00000508	cit-1.2	F44B9.3	36.7251	5.73141	0.153758	37.2757	4.07122e-304	1.09122e-303	36.7251	-0.268515	0.217961	-1.23194	0.217971	0.993234	36.7251	-0.172432	0.281104	-0.61341	0.539605	0.579538	36.7251	-0.540555	0.236726	-2.28347	0.022403	0.0455979	36.7251	-0.310785	0.404829	-0.767695	0.442668	0.652928	-0.440947	-0.483217
WBGene00000509	cka-1	C28D4.2	40.2148	5.11805	0.143299	35.716	2.23259e-279	5.56603e-279	40.2148	-0.0682848	0.201499	-0.338885	0.734697	0.99478	40.2148	0.168633	0.246458	0.684228	0.493831	0.537171	40.2148	0.206267	0.217714	0.947421	0.343424	0.442907	40.2148	0.0957988	0.334039	0.28679	0.774273	0.879879	0.100348	0.264432
WBGene00000514	ckb-4	F22F7.5	14.7155	3.9236	0.257465	15.2394	1.93765e-52	2.23229e-52	14.7155	0.326153	0.35857	0.909593	0.363037	1	14.7155	0.644413	0.448826	1.43578	0.151066	0.182639	14.7155	-0.517493	0.407132	-1.27107	0.203704	0.291226	14.7155	-0.9453	0.617237	-1.5315	0.125646	1	0.970566	-0.300886
WBGene00000515	ckc-1	T27A10.3	22.8484	4.04272	0.222488	18.1705	8.83509e-74	1.0991e-73	22.8484	-0.300407	0.316223	-0.949985	0.34212	0.99478	22.8484	0.739819	0.342945	2.15726	0.0309857	0.0424266	22.8484	0.30822	0.329887	0.93432	0.350139	0.449666	22.8484	-0.120348	0.483158	-0.249085	0.803295	0.89574	0.439412	0.619472
WBGene00000517	cki-2	T05A6.2	31.1191	5.43944	0.161208	33.7418	1.41128e-249	3.1784e-249	31.1191	0.0780375	0.226256	0.344908	0.730164	0.99478	31.1191	-1.11787	0.355109	-3.14795	0.0016442	0.00279404	31.1191	-0.515201	0.250929	-2.05317	0.0400556	0.0750802	31.1191	0.992897	0.443848	2.23702	0.0252851	0.104127	-1.03983	-0.124968
WBGene00000519	cku-70	Y47D3A.4	45.4605	5.37118	0.133772	40.1518	0	0	45.4605	0.119311	0.186679	0.639122	0.522744	0.99478	45.4605	-0.572188	0.241651	-2.36783	0.017893	0.0255263	45.4605	0.428159	0.197825	2.16433	0.0304389	0.0594376	45.4605	0.120012	0.329804	0.363889	0.715941	0.846212	-0.452877	-0.452176
WBGene00000520	cku-80	R07E5.8	50.5952	6.00539	0.133634	44.939	0	0	50.5952	0.158445	0.1872	0.846392	0.397334	0.99478	50.5952	-1.73754	0.285738	-6.08087	1.1953e-09	4.98007e-09	50.5952	0.0850649	0.195961	0.434091	0.664223	0.742301	50.5952	0.737289	0.372275	1.98049	0.0476481	0.162659	-1.57909	-1.00025
WBGene00000522	clc-1	C09F12.1	139.568	3.77874	0.18434	20.4988	2.20862e-93	2.94284e-93	139.568	-0.055653	0.258141	-0.215592	0.829306	0.99478	139.568	1.60228	0.19721	8.12478	4.48172e-16	3.70319e-15	139.568	2.86391	0.234562	12.2096	2.76193e-34	1.71448e-32	139.568	-0.526776	0.323975	-1.62598	0.103954	0.272145	1.54663	1.07551
WBGene00000527	cle-1	C36B1.1	55.4418	5.51856	0.185923	29.682	1.30997e-193	2.46353e-193	55.4418	-0.470502	0.264767	-1.77704	0.0755619	0.923859	55.4418	0.689434	0.267193	2.58028	0.00987197	0.0147471	55.4418	0.120691	0.265297	0.454927	0.649162	0.728778	55.4418	0.0991183	0.384539	0.257759	0.796593	0.891999	0.218932	0.788552
WBGene00000528	clh-1	T27D12.2	59.1101	4.90175	0.19436	25.22	2.41968e-140	3.8014e-140	59.1101	-0.44798	0.277306	-1.61547	0.106209	0.954102	59.1101	1.75218	0.2772	6.32099	2.59886e-10	1.17274e-09	59.1101	0.0783202	0.285565	0.274264	0.783882	0.840792	59.1101	0.191458	0.383355	0.499427	0.617479	0.785338	1.3042	1.94364
WBGene00000530	clh-3	E04F6.11	20.1133	4.42332	0.225435	19.6213	1.01793e-85	1.3185e-85	20.1133	0.209855	0.315226	0.665729	0.505584	1	20.1133	1.13523	0.406246	2.79443	0.00519906	0.00808922	20.1133	-1.00891	0.375124	-2.68953	0.00715522	0.0168545	20.1133	-0.434338	0.515212	-0.843028	0.399213	0.619109	1.34508	0.70089
WBGene00000532	clh-5	C07H4.2	65.8109	6.48631	0.107743	60.2015	0	0	65.8109	0.119398	0.150945	0.791008	0.428939	0.99478	65.8109	-0.473895	0.224043	-2.1152	0.0344128	0.0467895	65.8109	-0.657809	0.172468	-3.81409	0.000136685	0.000515676	65.8109	0.318939	0.288746	1.10457	0.269347	0.49468	-0.354497	-0.154956
WBGene00000533	clh-6	R07B7.1	26.5991	4.75792	0.255213	18.6429	1.44087e-77	1.81633e-77	26.5991	-0.0822094	0.360207	-0.228228	0.819469	0.99478	26.5991	-0.669428	0.396615	-1.68785	0.0914399	0.11511	26.5991	0.269002	0.358751	0.74983	0.453357	0.550904	26.5991	0.355126	0.561806	0.632115	0.527312	0.721153	-0.751637	-0.314301
WBGene00000534	cpi-2	R01B10.1	388.694	7.13583	0.0886327	80.5102	0	0	388.694	-0.0106147	0.124682	-0.0851339	0.932155	0.995931	388.694	1.97906	0.118891	16.646	3.23601e-62	3.18726e-60	388.694	0.535804	0.126008	4.25215	2.1173e-05	9.76312e-05	388.694	-0.595557	0.169685	-3.50978	0.000448486	0.00555181	1.96845	1.3835
WBGene00000535	cpi-1	K08B4.6	586.451	7.06687	0.106883	66.1176	0	0	586.451	-0.231891	0.151319	-1.53246	0.125409	0.965307	586.451	1.30262	0.131383	9.91469	3.59369e-23	5.11494e-22	586.451	1.77966	0.142576	12.4822	9.33335e-36	6.15584e-34	586.451	-0.181045	0.200354	-0.903625	0.366194	0.590546	1.07073	1.12157
WBGene00000536	clk-1	ZC395.2	25.8249	4.78686	0.158012	30.2942	1.36583e-201	2.63774e-201	25.8249	-0.128184	0.222785	-0.575372	0.56504	0.99478	25.8249	-0.438153	0.300396	-1.45858	0.14468	0.175579	25.8249	0.199591	0.241177	0.827572	0.407913	0.507795	25.8249	0.0048254	0.418616	0.011527	0.990803	0.994146	-0.566337	-0.433327
WBGene00000537	clk-2	C07H6.6	38.7988	5.94831	0.173741	34.2366	6.89627e-257	1.59495e-256	38.7988	-0.239272	0.245963	-0.972797	0.330654	0.99478	38.7988	-0.982604	0.330694	-2.97134	0.00296508	0.00482127	38.7988	-0.668816	0.259019	-2.58211	0.00981982	0.0221493	38.7988	0.836869	0.439873	1.90252	0.0571029	0.183749	-1.22188	-0.145735
WBGene00000539	cln-3.1	F07B10.1	12.1599	3.20165	0.260536	12.2887	1.04207e-34	1.1362e-34	12.1599	-0.0538994	0.365765	-0.147361	0.882847	1	12.1599	1.59316	0.452735	3.51897	0.000433221	0.000809359	12.1599	-0.380479	0.435923	-0.872812	0.382766	0.482532	12.1599	-0.664888	0.585857	-1.1349	0.256418	1	1.53926	0.928274
WBGene00000540	cln-3.2	C01G8.2	13.6365	4.21317	0.226136	18.6311	1.79869e-77	2.26662e-77	13.6365	-0.202325	0.319984	-0.632297	0.527193	1	13.6365	0.25835	0.437796	0.590115	0.555114	0.594207	13.6365	-0.711795	0.369842	-1.92459	0.0542802	0.0976066	13.6365	-0.094675	0.58872	-0.160815	0.872239	1	0.0560248	0.163675
WBGene00000542	clp-1	C06G4.2	109.319	6.41071	0.115703	55.4068	0	0	109.319	0.0651949	0.162456	0.401307	0.688194	0.99478	109.319	0.761816	0.172266	4.42231	9.76512e-06	2.35967e-05	109.319	0.172295	0.168574	1.02207	0.306746	0.405572	109.319	-0.693743	0.246517	-2.81419	0.00489011	0.032775	0.827011	0.0680725
WBGene00000543	clp-2	T04A8.16	19.5618	4.44537	0.186534	23.8314	1.57832e-125	2.35679e-125	19.5618	0.457784	0.257352	1.77883	0.0752684	1	19.5618	-0.20479	0.364596	-0.56169	0.574327	0.61176	19.5618	-0.187256	0.294683	-0.635448	0.525136	0.617311	19.5618	-0.651693	0.498126	-1.30829	0.190775	0.40231	0.252994	-0.856483
WBGene00000545	clp-4	Y39A3CL.5	47.4819	5.23608	0.210097	24.9222	4.28063e-137	6.63889e-137	47.4819	-0.296872	0.29785	-0.996716	0.318902	0.99478	47.4819	0.719842	0.308054	2.33674	0.0194528	0.0275495	47.4819	-0.10451	0.303191	-0.3447	0.73032	0.799359	47.4819	0.560433	0.427265	1.31167	0.18963	0.401109	0.42297	1.28027
WBGene00000547	clp-7	Y77E11A.11	65.8589	5.97354	0.120654	49.5095	0	0	65.8589	-0.0409923	0.169716	-0.241535	0.80914	0.99478	65.8589	-0.673228	0.209422	-3.21469	0.00130584	0.00225169	65.8589	0.438541	0.175093	2.50461	0.0122586	0.0269747	65.8589	0.297409	0.289561	1.0271	0.304371	0.53004	-0.714221	-0.375819
WBGene00000548	clr-1	F56D1.4	95.3589	7.14953	0.152538	46.8705	0	0	95.3589	-0.0843159	0.215499	-0.391259	0.695606	0.99478	95.3589	-0.348265	0.233355	-1.49242	0.135588	0.165442	95.3589	-0.632493	0.216578	-2.92039	0.0034959	0.00906113	95.3589	-0.154777	0.336886	-0.459435	0.645922	0.803214	-0.432581	-0.503042
WBGene00000549	cls-2	R107.6	52.448	6.05804	0.191192	31.6856	2.45392e-220	5.00611e-220	52.448	-0.00973411	0.269741	-0.0360868	0.971213	0.998148	52.448	-0.88568	0.300353	-2.94879	0.00319019	0.00515667	52.448	-0.0453371	0.268337	-0.168956	0.865831	0.903248	52.448	0.0419952	0.431814	0.0972531	0.922525	0.963376	-0.895414	-0.843684
WBGene00000550	clu-1	F55H2.6	127.664	7.59188	0.138621	54.7671	0	0	127.664	0.0832988	0.195584	0.425898	0.670182	0.99478	127.664	-0.948215	0.216775	-4.37419	1.21881e-05	2.90619e-05	127.664	-0.513449	0.19439	-2.64133	0.00825815	0.0191172	127.664	0.0315996	0.310262	0.101848	0.918877	0.961997	-0.864917	-0.916616
WBGene00000552	cmd-1	T21H3.3	192.175	7.61337	0.0985653	77.2419	0	0	192.175	0.0828123	0.13876	0.596804	0.550638	0.99478	192.175	0.556973	0.151021	3.68806	0.000225974	0.000442778	192.175	-0.495097	0.144661	-3.42247	0.000620543	0.00199389	192.175	0.0349596	0.207	0.168887	0.865886	0.933763	0.639785	0.591932
WBGene00000554	cnb-1	F55C10.1	24.4983	4.1899	0.215193	19.4704	1.95707e-84	2.51994e-84	24.4983	-0.420947	0.307508	-1.3689	0.171031	0.977785	24.4983	1.71729	0.364863	4.70669	2.51776e-06	6.67098e-06	24.4983	-0.6395	0.355156	-1.80062	0.0717627	0.122597	24.4983	0.242754	0.457956	0.530082	0.596055	0.769142	1.29635	1.96005
WBGene00000556	cnc-2	R09B5.3	76.7626	1.16583	0.391723	2.97614	0.00291897	0.00292451	76.7626	0.702746	0.514979	1.36461	0.172376	0.977785	76.7626	3.57906	0.410407	8.72076	2.76337e-18	2.75108e-17	76.7626	2.12933	0.515369	4.13166	3.6016e-05	0.000157333	76.7626	0.160082	0.612071	0.261541	0.793676	0.890581	4.28181	3.73915
WBGene00000557	cnc-3	R09B5.8	43.1845	2.56739	0.297525	8.62916	6.18049e-18	6.41136e-18	43.1845	0.166989	0.411762	0.405547	0.685075	0.99478	43.1845	2.06717	0.35459	5.82976	5.55085e-09	2.12315e-08	43.1845	1.77809	0.401564	4.42792	9.51476e-06	4.72667e-05	43.1845	-0.296458	0.52827	-0.561188	0.57467	0.753557	2.23416	1.77071
WBGene00000558	cnc-4	R09B5.9	99.7007	2.29379	0.579359	3.95919	7.52059e-05	7.55331e-05	99.7007	0.32494	0.811763	0.40029	0.688943	0.99478	99.7007	1.74764	0.696244	2.51009	0.01207	0.0177047	99.7007	2.22375	0.765559	2.90474	0.00367563	0.00946059	99.7007	1.82061	1.05715	1.72218	0.0850365	0.238837	2.07258	3.56824
WBGene00000564	cnk-1	R01H10.8	37.99	5.72909	0.22129	25.8895	8.75037e-148	1.41041e-147	37.99	-0.0126924	0.312263	-0.0406465	0.967578	0.998148	37.99	-1.16759	0.368032	-3.17252	0.00151122	0.00258112	37.99	-0.2678	0.31291	-0.855837	0.392088	0.491825	37.99	0.46358	0.512784	0.904045	0.365972	0.590323	-1.18028	-0.70401
WBGene00000565	cnt-1	Y17G7B.15	23.6922	4.92799	0.245937	20.0376	2.5877e-89	3.39707e-89	23.6922	-0.307267	0.348654	-0.881296	0.378157	0.99478	23.6922	1.42804	0.408391	3.49674	0.000470982	0.000875198	23.6922	-1.35584	0.392973	-3.4502	0.000560177	0.00182372	23.6922	-0.3665	0.543029	-0.674918	0.499728	0.698394	1.12077	1.06154
WBGene00000566	cnt-2	Y39A1A.15	50.7707	6.09832	0.113872	53.5542	0	0	50.7707	-0.119179	0.160613	-0.742029	0.45807	0.99478	50.7707	-0.224147	0.237116	-0.945306	0.344503	0.388111	50.7707	-0.629848	0.186144	-3.38366	0.000715268	0.00225992	50.7707	0.363163	0.307211	1.18213	0.237155	0.458048	-0.343326	0.139016
WBGene00000567	cnx-1	ZK632.6	116.236	7.22832	0.169539	42.6351	0	0	116.236	0.0342192	0.239367	0.142957	0.886324	0.995157	116.236	-0.157618	0.242817	-0.649122	0.51626	0.557953	116.236	-0.546318	0.236271	-2.31225	0.0207638	0.0427367	116.236	0.115661	0.34888	0.33152	0.740251	0.861769	-0.123399	-0.0419572
WBGene00000585	cogc-2	C06G3.10	58.6426	6.25713	0.219494	28.507	9.58514e-179	1.71483e-178	58.6426	0.169882	0.309477	0.548932	0.583052	0.99478	58.6426	-1.27016	0.333203	-3.81196	0.000137868	0.000277923	58.6426	-0.0413529	0.30231	-0.13679	0.891197	0.92048	58.6426	0.0733642	0.480664	0.152631	0.878689	0.941866	-1.10027	-1.19679
WBGene00000597	col-8	F11H8.3	574.815	8.54902	0.151361	56.481	0	0	574.815	0.245381	0.21373	1.14809	0.250932	0.993234	574.815	2.25101	0.19241	11.699	1.2893e-31	3.45076e-30	574.815	-0.52478	0.205679	-2.55145	0.0107277	0.0240356	574.815	-1.64514	0.287638	-5.71947	1.06857e-08	1.3275e-06	2.49639	0.605875
WBGene00000608	col-19	ZK1193.1	594.737	8.34082	0.131509	63.4239	0	0	594.737	0.329653	0.185476	1.77734	0.0755124	0.923859	594.737	0.624869	0.164442	3.79994	0.000144729	0.000290125	594.737	1.05163	0.175547	5.99057	2.09102e-09	2.07334e-08	594.737	-1.63564	0.251755	-6.49695	8.19672e-11	4.16211e-08	0.954522	-1.01077
WBGene00000609	col-20	F11G11.11	1123.39	9.46351	0.190435	49.6943	0	0	1123.39	0.307898	0.269161	1.14392	0.252657	0.993234	1123.39	1.81366	0.235404	7.70443	1.31429e-14	9.55575e-14	1123.39	-0.0453847	0.253491	-0.179039	0.857907	0.897602	1123.39	-1.93077	0.358409	-5.38704	7.16264e-08	6.40042e-06	2.12155	-0.117109
WBGene00000611	col-34	F36A4.10	18.4637	3.2434	0.232392	13.9566	2.86825e-44	3.21368e-44	18.4637	-0.253322	0.330079	-0.767459	0.442809	1	18.4637	1.11652	0.365329	3.05621	0.00224156	0.00371774	18.4637	0.461347	0.355684	1.29707	0.194608	0.280297	18.4637	0.207794	0.488094	0.425725	0.670308	0.818704	0.863199	1.32432
WBGene00000620	col-43	ZC513.8	32.6463	3.0082	0.269567	11.1594	6.44493e-29	6.89382e-29	32.6463	-0.330575	0.38458	-0.859574	0.390024	0.99478	32.6463	-0.182871	0.324804	-0.563019	0.573422	0.611148	32.6463	2.74406	0.347346	7.90007	2.78737e-15	5.29314e-14	32.6463	-0.129533	0.525514	-0.246487	0.805305	0.896942	-0.513446	-0.312403
WBGene00000652	col-76	M110.1	21.9089	4.41322	0.280937	15.7089	1.31354e-55	1.53191e-55	21.9089	-0.655367	0.401896	-1.63069	0.102956	0.954102	21.9089	1.96817	0.428745	4.59052	4.42133e-06	1.12855e-05	21.9089	-0.900724	0.432779	-2.08125	0.0374106	0.0708232	21.9089	-0.892766	0.606618	-1.47171	0.141099	0.331854	1.3128	1.0754
WBGene00000656	col-80	C09G5.5	822.565	9.00123	0.159947	56.2765	0	0	822.565	0.285744	0.225954	1.26461	0.206012	0.988437	822.565	1.5904	0.199068	7.98922	1.35795e-15	1.06942e-14	822.565	0.133576	0.213768	0.624863	0.532061	0.623961	822.565	-1.79382	0.302584	-5.92834	3.0601e-09	5.59407e-07	1.87614	-0.203424
WBGene00000668	col-93	W05B2.5	149.315	7.40246	0.209009	35.417	9.34913e-275	2.29824e-274	149.315	0.266765	0.295036	0.904176	0.365902	0.99478	149.315	1.94508	0.281051	6.92073	4.49323e-12	2.52024e-11	149.315	-1.45185	0.293916	-4.93968	7.82502e-07	4.86561e-06	149.315	-1.60233	0.41019	-3.90632	9.37134e-05	0.00176684	2.21184	0.342747
WBGene00000670	col-95	Y41C4A.16	2428.34	6.17544	0.150005	41.1682	0	0	2428.34	0.322056	0.210164	1.53241	0.125422	0.965307	2428.34	0.762291	0.173121	4.40323	1.06649e-05	2.56368e-05	2428.34	5.35274	0.193645	27.642	3.48629e-168	1.28766e-164	2428.34	-1.1385	0.272665	-4.17545	2.97391e-05	0.000710979	1.08435	-0.376211
WBGene00000671	col-96	Y41C4A.19	24.5439	2.93425	0.284342	10.3195	5.75475e-25	6.07812e-25	24.5439	-0.101182	0.400157	-0.252856	0.800379	0.99478	24.5439	1.24446	0.366238	3.39795	0.000678918	0.00122667	24.5439	1.43861	0.391166	3.67775	0.000235303	0.000845831	24.5439	-0.531497	0.548808	-0.968458	0.332815	0.558889	1.14328	0.712962
WBGene00000673	col-98	F14F7.1	371.123	7.83774	0.128626	60.9342	0	0	371.123	0.277917	0.181233	1.53348	0.125158	0.965307	371.123	0.859514	0.165046	5.20773	1.91161e-07	5.95072e-07	371.123	0.552959	0.174107	3.17597	0.00149339	0.00428913	371.123	-1.09702	0.248279	-4.41851	9.93835e-06	0.00030325	1.13743	-0.237509
WBGene00000675	col-101	K02D7.3	2668.68	9.04752	0.121338	74.5646	0	0	2668.68	0.0603578	0.171423	0.352098	0.724765	0.99478	2668.68	1.19391	0.14821	8.05552	7.91436e-16	6.42454e-15	2668.68	2.24663	0.160473	14	1.55791e-44	1.74368e-42	2668.68	-1.02471	0.226942	-4.51529	6.32309e-06	0.000212511	1.25427	0.169202
WBGene00000677	col-103	F56B3.1	241.512	7.14848	0.120534	59.3068	0	0	241.512	0.106667	0.169689	0.628599	0.529612	0.99478	241.512	0.927753	0.158717	5.84534	5.05541e-09	1.95213e-08	241.512	0.636504	0.165516	3.84557	0.00012027	0.00045914	241.512	-1.00371	0.237452	-4.22699	2.3684e-05	0.000599161	1.03442	-0.0759523
WBGene00000680	col-106	Y77E11A.15	1184	8.11934	0.103125	78.7332	0	0	1184	0.162534	0.145303	1.11859	0.263316	0.993234	1184	1.67343	0.126923	13.1845	1.0773e-39	4.25561e-38	1184	1.54018	0.137506	11.2008	4.03961e-29	1.83071e-27	1184	-0.951295	0.192904	-4.93144	8.16259e-07	4.49937e-05	1.83596	0.72213
WBGene00000692	col-118	T11B7.3	22.5282	4.00854	0.226881	17.668	7.39404e-70	9.06251e-70	22.5282	-0.514893	0.325804	-1.58038	0.114021	0.955072	22.5282	1.40165	0.348985	4.01638	5.90997e-05	0.000127168	22.5282	0.0111167	0.346236	0.0321071	0.974387	0.982851	22.5282	-0.467398	0.494027	-0.946098	0.344099	0.569026	0.886761	0.934257
WBGene00000693	col-119	C53B4.5	2778.58	10.0885	0.161389	62.5102	0	0	2778.58	0.262154	0.228129	1.14915	0.250496	0.993234	2778.58	1.92429	0.198417	9.69819	3.06895e-22	4.07739e-21	2778.58	0.619712	0.214137	2.894	0.00380368	0.00974264	2778.58	-1.50355	0.302433	-4.9715	6.64373e-07	3.78856e-05	2.18644	0.420738
WBGene00000696	col-122	T05A1.2	3707.99	9.90052	0.0875913	113.031	0	0	3707.99	0.11234	0.123713	0.908068	0.363842	0.99478	3707.99	1.38082	0.10756	12.8377	1.00771e-37	3.64901e-36	3707.99	1.59223	0.116215	13.7006	1.00625e-42	9.40911e-41	3707.99	-0.75399	0.163997	-4.59758	4.27431e-06	0.000160473	1.49316	0.626833
WBGene00000698	col-124	C24F3.6	955.1	9.46631	0.147187	64.3146	0	0	955.1	0.397382	0.207925	1.91118	0.0559818	0.891282	955.1	0.873615	0.183163	4.76962	1.84577e-06	4.98891e-06	955.1	0.271188	0.196225	1.38203	0.166964	0.247156	955.1	-1.66538	0.279098	-5.96703	2.41607e-09	4.91528e-07	1.271	-0.791769
WBGene00000703	col-129	M18.1	23.9423	5.01275	0.179129	27.9841	2.53742e-172	4.44064e-172	23.9423	-0.0171348	0.251945	-0.0680101	0.945778	0.996519	23.9423	0.24268	0.336336	0.721539	0.470578	0.515336	23.9423	-0.678306	0.287676	-2.35788	0.0183795	0.0383964	23.9423	-0.621817	0.472108	-1.31711	0.187802	0.398092	0.225545	-0.379137
WBGene00000712	col-139	F41F3.4	19.8772	4.8301	0.246018	19.6331	8.05643e-86	1.04464e-85	19.8772	-0.110788	0.347404	-0.318904	0.7498	1	19.8772	1.17001	0.412992	2.83301	0.0046112	0.00723974	19.8772	-1.22796	0.391242	-3.13863	0.00169741	0.00480413	19.8772	-1.69579	0.625411	-2.71147	0.00669846	0.0410169	1.05922	-0.525778
WBGene00000713	col-140	F26F12.1	2893.32	10.0241	0.139587	71.8127	0	0	2893.32	0.289623	0.197267	1.46818	0.142055	0.968704	2893.32	1.81791	0.17163	10.5921	3.24365e-26	5.82989e-25	2893.32	0.863369	0.185246	4.66066	3.15201e-06	1.72601e-05	2893.32	-1.59047	0.261665	-6.07825	1.21503e-09	2.81765e-07	2.10754	0.227449
WBGene00000715	col-142	T15B7.4	57.9682	5.55208	0.165714	33.504	4.21272e-246	9.37048e-246	57.9682	-0.198864	0.234436	-0.848266	0.39629	0.99478	57.9682	1.24223	0.239253	5.19213	2.07897e-07	6.44726e-07	57.9682	0.0469492	0.241356	0.194523	0.845766	0.889096	57.9682	-1.67311	0.370172	-4.51981	6.18954e-06	0.000211082	1.04337	-0.430876
WBGene00000716	col-143	T15B7.3	3022.77	9.09766	0.125587	72.4409	0	0	3022.77	0.276413	0.177321	1.55882	0.119038	0.965307	3022.77	1.05859	0.153299	6.90543	5.00527e-12	2.7947e-11	3022.77	2.45241	0.165991	14.7743	2.14475e-49	3.30069e-47	3022.77	-1.13134	0.234683	-4.82072	1.43038e-06	6.86289e-05	1.33501	-0.072746
WBGene00000723	col-150	B0024.2	23.2194	2.65815	0.286825	9.26752	1.90533e-20	1.98486e-20	23.2194	0.251336	0.395067	0.636185	0.524656	0.99478	23.2194	1.57995	0.355979	4.43832	9.06628e-06	2.20595e-05	23.2194	1.61541	0.391597	4.12517	3.70463e-05	0.000161262	23.2194	-1.91892	0.561594	-3.41691	0.000633364	0.00727114	1.83129	-0.338965
WBGene00000728	col-155	F55C10.3	21.558	2.90164	0.291489	9.95454	2.4094e-23	2.53139e-23	21.558	-0.0498133	0.409186	-0.121738	0.903107	0.995157	21.558	1.96016	0.39521	4.95979	7.0568e-07	2.02677e-06	21.558	0.808949	0.421085	1.92111	0.0547182	0.0981791	21.558	-1.05533	0.570741	-1.84905	0.0644505	0.199888	1.91034	0.904828
WBGene00000731	col-158	D2023.7	24.9737	2.26328	0.269023	8.41295	3.99835e-17	4.13783e-17	24.9737	0.0470745	0.371833	0.126601	0.899256	0.995157	24.9737	1.70267	0.317786	5.35792	8.41869e-08	2.78001e-07	24.9737	1.82852	0.363358	5.03227	4.84697e-07	3.16016e-06	24.9737	-0.805785	0.488795	-1.64851	0.0992473	0.26404	1.74975	0.896889
WBGene00000732	col-159	F57B1.3	30.387	4.18128	0.212951	19.6349	7.77916e-86	1.00886e-85	30.387	0.290478	0.295875	0.981762	0.326217	0.99478	30.387	1.77578	0.326749	5.4347	5.48875e-08	1.8633e-07	30.387	-0.10246	0.329415	-0.311036	0.755773	0.818606	30.387	-1.16208	0.441464	-2.63234	0.00848	0.048676	2.06626	0.613703
WBGene00000733	col-160	F57B1.4	404.544	7.7726	0.144444	53.8103	0	0	404.544	0.291588	0.203634	1.43192	0.152166	0.973531	404.544	0.46934	0.181395	2.5874	0.00967033	0.0144722	404.544	1.14018	0.192969	5.90861	3.44999e-09	3.32703e-08	404.544	-1.41454	0.277474	-5.09791	3.43423e-07	2.27542e-05	0.760928	-0.945196
WBGene00000739	col-166	T07H6.3	27.5434	4.40064	0.167332	26.2989	1.97633e-152	3.23133e-152	27.5434	-0.32119	0.23856	-1.34637	0.178184	0.981054	27.5434	1.36152	0.282676	4.81655	1.46059e-06	4.00645e-06	27.5434	-0.108862	0.271282	-0.401289	0.688207	0.762815	27.5434	-0.578931	0.386317	-1.49859	0.13398	0.321993	1.04033	0.782593
WBGene00000751	col-178	C34F6.2	1085.55	8.67339	0.128831	67.324	0	0	1085.55	0.269661	0.181824	1.48309	0.138051	0.968704	1085.55	1.80247	0.159913	11.2716	1.81307e-29	4.05854e-28	1085.55	0.767927	0.172219	4.45901	8.23405e-06	4.16039e-05	1085.55	-1.42508	0.24247	-5.87735	4.16876e-09	7.15794e-07	2.07213	0.377384
WBGene00000752	col-179	C34F6.3	93.0789	6.85081	0.197702	34.6522	4.14452e-263	9.80325e-263	93.0789	0.406306	0.278532	1.45874	0.144636	0.968704	93.0789	0.794064	0.278227	2.85402	0.00431704	0.00681846	93.0789	-0.959778	0.27986	-3.4295	0.000604702	0.00195097	93.0789	-1.30793	0.407294	-3.21126	0.00132152	0.0125599	1.20037	-0.513863
WBGene00000754	col-181	W03G11.1	2630.82	9.0722	0.0848203	106.958	0	0	2630.82	0.13926	0.119637	1.16402	0.244416	0.993234	2630.82	1.43765	0.103706	13.8628	1.0648e-43	4.88549e-42	2630.82	1.91638	0.112451	17.0419	4.01189e-65	1.28852e-62	2630.82	-0.810738	0.158402	-5.11822	3.08436e-07	2.12455e-05	1.57691	0.626911
WBGene00000757	col-184	F15A2.1	2724.66	9.5949	0.107398	89.3395	0	0	2724.66	0.0669528	0.151746	0.441217	0.659056	0.99478	2724.66	1.33121	0.132024	10.083	6.56636e-24	9.9397e-23	2724.66	1.45508	0.142525	10.2093	1.80148e-24	6.07649e-23	2724.66	-0.625933	0.201191	-3.11114	0.00186364	0.0161865	1.39816	0.705272
WBGene00000761	coq-1	C24A11.9	54.5377	4.92739	0.153469	32.1067	3.55179e-226	7.38448e-226	54.5377	0.240734	0.213052	1.12993	0.258506	0.993234	54.5377	1.96372	0.242544	8.09632	5.66463e-16	4.65975e-15	54.5377	-0.18848	0.244421	-0.771126	0.440632	0.538832	54.5377	-1.02724	0.317242	-3.23803	0.0012036	0.0118604	2.20445	0.936478
WBGene00000762	coq-2	F57B9.4	31.67	5.01692	0.189811	26.4311	6.02542e-154	9.89766e-154	31.67	-0.0954339	0.267719	-0.356471	0.721488	0.99478	31.67	0.178055	0.310868	0.572768	0.566802	0.604966	31.67	-0.110611	0.282632	-0.391361	0.69553	0.769374	31.67	0.0371291	0.428636	0.0866215	0.930972	0.967838	0.0826214	0.215184
WBGene00000763	coq-3	Y57G11C.11	22.0529	4.84289	0.186233	26.0045	4.40879e-149	7.13891e-149	22.0529	-0.148214	0.263016	-0.563517	0.573083	0.99478	22.0529	0.573059	0.350307	1.63588	0.101866	0.127194	22.0529	-0.821541	0.306712	-2.67855	0.00739428	0.0173292	22.0529	-0.176793	0.463799	-0.381184	0.703066	0.839349	0.424845	0.396266
WBGene00000764	coq-4	T03F1.2	18.9259	4.14165	0.306207	13.5257	1.10351e-41	1.22858e-41	18.9259	0.0791487	0.430809	0.183721	0.854232	1	18.9259	-0.139777	0.451454	-0.309615	0.756853	0.781941	18.9259	0.348905	0.430059	0.811298	0.417195	0.516564	18.9259	-0.476187	0.661787	-0.719547	0.471804	0.676451	-0.0606285	-0.615964
WBGene00000766	coq-6	K07B1.2	37.7304	4.8286	0.156313	30.8906	1.59605e-209	3.15494e-209	37.7304	0.123819	0.217895	0.568248	0.569867	0.99478	37.7304	-0.190628	0.24789	-0.769004	0.441891	0.486765	37.7304	0.852456	0.223567	3.81297	0.000137304	0.000517747	37.7304	-0.725185	0.369611	-1.96202	0.0497598	0.167622	-0.0668096	-0.915813
WBGene00000767	coq-8	C35D10.4	57.5993	6.30206	0.135143	46.6325	0	0	57.5993	-0.0739823	0.190618	-0.388118	0.697929	0.99478	57.5993	-1.24305	0.258372	-4.81109	1.50107e-06	4.11255e-06	57.5993	-0.146272	0.197912	-0.73908	0.459858	0.557155	57.5993	0.609902	0.348398	1.75059	0.0800169	0.229463	-1.31704	-0.633152
WBGene00000768	cor-1	R01H10.3	14.651	4.07471	0.328946	12.3872	3.0664e-35	3.34982e-35	14.651	-0.542872	0.468831	-1.15793	0.246894	1	14.651	0.997205	0.504098	1.9782	0.0479065	0.0636713	14.651	-0.660991	0.49118	-1.34572	0.178393	0.260948	14.651	-0.255916	0.71537	-0.35774	0.720538	1	0.454333	0.741289
WBGene00000770	cpb-1	C40H1.1	35.8787	5.25357	0.176781	29.718	4.49672e-194	8.46947e-194	35.8787	-0.159493	0.249809	-0.638458	0.523175	0.99478	35.8787	-1.86318	0.342571	-5.43882	5.36352e-08	1.82498e-07	35.8787	0.551765	0.249914	2.20782	0.0272568	0.0541107	35.8787	1.46495	0.446877	3.27819	0.00104475	0.0106417	-2.02267	-0.398233
WBGene00000772	cpb-3	B0414.5	60.0006	6.57618	0.216871	30.3231	5.69403e-202	1.10109e-201	60.0006	-0.0368617	0.306364	-0.12032	0.90423	0.995157	60.0006	-1.1919	0.346529	-3.43954	0.000582696	0.00106465	60.0006	-0.72915	0.303891	-2.39938	0.0164228	0.0347609	60.0006	0.952693	0.477463	1.99532	0.0460075	0.159162	-1.22876	-0.239209
WBGene00000773	cpf-1	F28C6.3	73.2982	6.42126	0.155526	41.2874	0	0	73.2982	0.309111	0.218376	1.4155	0.156922	0.973531	73.2982	-1.28554	0.258426	-4.97451	6.54128e-07	1.88457e-06	73.2982	0.124051	0.218343	0.568147	0.569935	0.657727	73.2982	0.192121	0.360036	0.533617	0.593607	0.767396	-0.97643	-1.09342
WBGene00000774	cpf-2	F56A8.6	48.2484	5.50552	0.14528	37.8958	0	0	48.2484	0.159339	0.203123	0.784443	0.43278	0.99478	48.2484	-1.0371	0.252098	-4.1139	3.89035e-05	8.5939e-05	48.2484	0.656113	0.20665	3.175	0.00149837	0.00430177	48.2484	0.0260358	0.354783	0.0733851	0.9415	0.971234	-0.877766	-1.01107
WBGene00000775	cpin-1	F38E11.3	14.3166	3.44111	0.316454	10.874	1.53351e-27	1.63417e-27	14.3166	-0.196372	0.447672	-0.438652	0.660914	1	14.3166	1.58943	0.479789	3.31277	0.00092376	0.00163288	14.3166	-0.248992	0.481015	-0.517639	0.60471	0.690096	14.3166	-0.880215	0.67299	-1.30792	0.190901	1	1.39306	0.709217
WBGene00000776	cpl-1	T03E6.7	1676.51	9.09269	0.100303	90.6521	0	0	1676.51	0.0688096	0.141639	0.485811	0.627101	0.99478	1676.51	2.52485	0.126124	20.0189	3.77151e-89	9.28671e-87	1676.51	0.205275	0.135685	1.51288	0.13031	0.201212	1676.51	-0.632638	0.188137	-3.36265	0.000771986	0.00848797	2.59366	1.89222
WBGene00000777	cpn-1	F43G9.9	133.783	6.93848	0.103864	66.8037	0	0	133.783	0.18595	0.145598	1.27714	0.201552	0.986533	133.783	-0.644308	0.164893	-3.90743	9.32845e-05	0.000192699	133.783	0.458762	0.146785	3.1254	0.00177563	0.00499679	133.783	0.0482532	0.232373	0.207654	0.835499	0.914501	-0.458358	-0.596055
WBGene00000779	cpn-3	F28H1.2	980.927	7.96142	0.116198	68.5157	0	0	980.927	-0.191909	0.164343	-1.16773	0.242914	0.993234	980.927	1.68911	0.143291	11.7879	4.50485e-32	1.24169e-30	980.927	1.43304	0.155029	9.2437	2.3812e-20	6.23757e-19	980.927	-0.637706	0.21805	-2.92459	0.00344909	0.0255727	1.4972	1.0514
WBGene00000780	cpn-4	F49D11.8	30.1259	3.93484	0.242825	16.2044	4.69414e-59	5.54278e-59	30.1259	-0.13878	0.342765	-0.404885	0.685562	0.99478	30.1259	0.589285	0.339281	1.73687	0.0824109	0.104816	30.1259	0.919019	0.340429	2.69959	0.00694254	0.0164426	30.1259	0.0677761	0.489205	0.138543	0.889811	0.946692	0.450505	0.657061
WBGene00000781	cpr-1	C52E4.1	459.696	8.12531	0.191723	42.3806	0	0	459.696	0.152604	0.270857	0.563412	0.573154	0.99478	459.696	4.32119	0.320688	13.4748	2.20217e-41	9.19062e-40	459.696	-4.31595	0.329871	-13.0837	4.07928e-39	3.24017e-37	459.696	2.09804	0.363467	5.77229	7.82005e-09	1.14569e-06	4.47379	6.41922
WBGene00000783	cpr-3	T10H4.12	81.6688	4.09677	0.196751	20.8221	2.72974e-96	3.67364e-96	81.6688	0.357337	0.271456	1.31637	0.188049	0.981054	81.6688	1.07025	0.240468	4.4507	8.55928e-06	2.09078e-05	81.6688	1.94895	0.262417	7.42692	1.11156e-13	1.7773e-12	81.6688	-0.426886	0.361648	-1.18039	0.237845	0.458981	1.42759	0.643365
WBGene00000784	cpr-4	F44C4.3	963.84	7.51261	0.168305	44.6368	0	0	963.84	-0.0701592	0.237842	-0.294982	0.768007	0.99478	963.84	5.29969	0.233481	22.6986	4.62214e-114	2.00846e-111	963.84	-1.87163	0.248784	-7.52312	5.34825e-14	8.95863e-13	963.84	0.133935	0.313901	0.426681	0.669612	0.818284	5.22953	5.43363
WBGene00000785	cpr-5	W07B8.5	865.853	8.51514	0.127596	66.7351	0	0	865.853	0.397214	0.179936	2.20753	0.0272769	0.792078	865.853	5.96415	0.203532	29.3032	9.43046e-189	2.32209e-185	865.853	-3.32424	0.213189	-15.5929	8.12955e-55	1.7158e-52	865.853	-1.66982	0.240311	-6.94856	3.69042e-12	3.66775e-09	6.36137	4.29433
WBGene00000786	cpr-6	C25B8.3	2839.39	9.37951	0.121121	77.4389	0	0	2839.39	0.216101	0.171075	1.26319	0.20652	0.988437	2839.39	3.3328	0.150933	22.0813	4.77822e-108	1.85772e-105	2839.39	-0.055415	0.162831	-0.340322	0.733614	0.802251	2839.39	-0.705759	0.226385	-3.11751	0.00182383	0.0159424	3.5489	2.62705
WBGene00000787	cps-6	C41D11.8	56.5732	5.23386	0.147909	35.3857	2.83549e-274	6.95642e-274	56.5732	-0.153668	0.208872	-0.735704	0.461911	0.99478	56.5732	-0.0933716	0.222322	-0.419984	0.674497	0.705838	56.5732	0.917614	0.208367	4.40384	1.06351e-05	5.20277e-05	56.5732	0.0417105	0.321584	0.129703	0.896801	0.949193	-0.247039	-0.051661
WBGene00000788	cpz-1	F32B5.8	992.974	8.45977	0.105804	79.9569	0	0	992.974	-0.0149446	0.149416	-0.10002	0.920328	0.995166	992.974	2.34777	0.134952	17.397	8.69407e-68	1.07038e-65	992.974	0.13569	0.144597	0.938403	0.348037	0.447589	992.974	-0.29295	0.198925	-1.47266	0.140842	0.331452	2.33282	2.05482
WBGene00000789	cpz-2	M04G12.2	262.928	6.35796	0.131159	48.4751	0	0	262.928	-0.155936	0.18535	-0.841302	0.400179	0.99478	262.928	2.2527	0.170056	13.2468	4.71094e-40	1.88107e-38	262.928	0.65838	0.182685	3.60391	0.000313468	0.00108104	262.928	-0.79007	0.248998	-3.17299	0.00150876	0.0139421	2.09676	1.46263
WBGene00000792	crb-1	F11C7.4	29.7514	6.01063	0.18975	31.6765	3.276e-220	6.67766e-220	29.7514	-0.504291	0.269801	-1.86913	0.0616053	0.900769	29.7514	0.10765	0.3808	0.282695	0.777411	0.801051	29.7514	-1.95862	0.314358	-6.23056	4.64771e-10	4.99021e-09	29.7514	0.269269	0.508117	0.529936	0.596157	0.769142	-0.396641	0.37692
WBGene00000793	crh-1	Y41C4A.4	70.4186	5.35675	0.146547	36.5531	1.59144e-292	4.13071e-292	70.4186	0.126987	0.204896	0.619763	0.535414	0.99478	70.4186	0.0794349	0.211586	0.375426	0.707344	0.73604	70.4186	0.999587	0.204627	4.88492	1.03471e-06	6.28567e-06	70.4186	-0.114767	0.304341	-0.377101	0.706099	0.840599	0.206422	-0.0353326
WBGene00000794	crn-1	Y47G6A.8	72.0287	6.30107	0.111533	56.4953	0	0	72.0287	0.0677114	0.156405	0.432924	0.66507	0.99478	72.0287	-2.07859	0.243766	-8.52697	1.50228e-17	1.41169e-16	72.0287	0.498126	0.160258	3.10827	0.00188189	0.00524585	72.0287	1.2265	0.310717	3.94733	7.90289e-05	0.00153577	-2.01088	-0.852089
WBGene00000795	crn-2	CD4.2	19.8649	3.07555	0.261288	11.7707	5.52487e-32	5.97019e-32	19.8649	0.516611	0.356708	1.44827	0.14754	1	19.8649	-0.0772887	0.368458	-0.209763	0.833853	0.853022	19.8649	1.57261	0.356905	4.40625	1.05173e-05	5.15195e-05	19.8649	-0.521327	0.536578	-0.971577	0.331261	0.557336	0.439322	-0.598616
WBGene00000796	crn-3	C14A4.4	116.202	7.42373	0.132369	56.0835	0	0	116.202	-0.0826004	0.186983	-0.441754	0.658667	0.99478	116.202	-0.909519	0.214416	-4.24184	2.21692e-05	5.07637e-05	116.202	-0.499058	0.187743	-2.6582	0.00785591	0.018295	116.202	0.521257	0.298815	1.74441	0.0810875	0.231674	-0.992119	-0.388262
WBGene00000797	crn-4	AH9.2	17.0096	4.7874	0.277664	17.2417	1.29135e-66	1.56278e-66	17.0096	-0.0749319	0.391988	-0.191159	0.848401	1	17.0096	-0.169286	0.500465	-0.338256	0.73517	0.761456	17.0096	-1.15834	0.426077	-2.7186	0.00655579	0.0156622	17.0096	0.431358	0.661425	0.652164	0.514295	0.71104	-0.244217	0.262072
WBGene00000798	crn-5	C14A4.5	23.1125	4.65877	0.192653	24.1822	3.42275e-129	5.16841e-129	23.1125	0.11536	0.269648	0.427817	0.668784	0.99478	23.1125	-1.21982	0.373041	-3.26994	0.00107572	0.00188436	23.1125	0.330401	0.281569	1.17343	0.240624	0.332926	23.1125	0.395362	0.502993	0.786019	0.431856	0.64542	-1.10446	-0.824457
WBGene00000799	crn-6	K04H4.6	26.1983	3.97102	0.341743	11.6199	3.26535e-31	3.51928e-31	26.1983	-0.285848	0.484265	-0.590272	0.555008	0.99478	26.1983	1.02028	0.459839	2.21877	0.0265021	0.0366956	26.1983	0.43808	0.475439	0.921421	0.356831	0.455645	26.1983	-0.183284	0.673814	-0.272009	0.785615	0.886397	0.73443	0.836995
WBGene00000800	cars-1	Y23H5A.7	74.6986	6.23174	0.158043	39.4306	0	0	74.6986	0.0669926	0.222535	0.301044	0.763381	0.99478	74.6986	-0.741078	0.240932	-3.07587	0.00209886	0.00350063	74.6986	0.373668	0.220289	1.69626	0.0898359	0.148162	74.6986	0.0886338	0.345549	0.256502	0.797563	0.892353	-0.674086	-0.652444
WBGene00000802	crt-1	Y38A10A.5	572.06	9.71651	0.083726	116.051	0	0	572.06	0.0380806	0.118261	0.322005	0.747449	0.99478	572.06	0.888579	0.120083	7.39971	1.3648e-13	9.02578e-13	572.06	-1.54507	0.119965	-12.8793	5.88426e-38	4.48114e-36	572.06	-0.224138	0.169463	-1.32264	0.185956	0.395867	0.926659	0.66444
WBGene00000803	csb-1	F53H4.1	19.8505	4.99377	0.212895	23.4564	1.13685e-121	1.67156e-121	19.8505	-0.0878869	0.300384	-0.292582	0.769842	1	19.8505	-1.03257	0.460981	-2.23995	0.0250945	0.0348904	19.8505	-0.844304	0.332505	-2.53923	0.0111098	0.0247791	19.8505	1.13626	0.577488	1.96759	0.0491153	0.166194	-1.12046	0.103687
WBGene00000804	csc-1	Y48E1B.12	31.9766	5.15865	0.182674	28.2397	1.90718e-175	3.37042e-175	31.9766	0.264648	0.255368	1.03634	0.300045	0.99478	31.9766	-1.38198	0.351613	-3.9304	8.4804e-05	0.000177213	31.9766	0.181196	0.26499	0.683781	0.494113	0.588335	31.9766	0.638487	0.462677	1.37998	0.167592	0.371004	-1.11733	-0.743493
WBGene00000812	csk-1	Y48G1C.2	19.8725	4.59626	0.227384	20.2136	7.42813e-91	9.80375e-91	19.8725	-0.0254045	0.32019	-0.079342	0.936761	1	19.8725	-0.91797	0.41769	-2.19773	0.0279684	0.0385452	19.8725	-0.0316441	0.334101	-0.0947144	0.924542	0.946058	19.8725	0.48956	0.564769	0.866833	0.386034	0.608175	-0.943375	-0.42841
WBGene00000813	csn-1	Y59A8A.1	41.3865	5.77321	0.155336	37.166	2.414e-302	6.43996e-302	41.3865	0.0651075	0.218323	0.298217	0.765538	0.99478	41.3865	-0.521635	0.295845	-1.76321	0.0778655	0.0994283	41.3865	-0.555857	0.238095	-2.33461	0.019564	0.0405611	41.3865	0.50328	0.386227	1.30307	0.192552	0.404261	-0.456528	-0.0183554
WBGene00000814	csn-2	B0025.2	61.2665	5.89664	0.109626	53.7885	0	0	61.2665	0.245692	0.152156	1.61474	0.106368	0.954102	61.2665	-0.664753	0.210783	-3.15373	0.00161198	0.00274182	61.2665	0.268366	0.165355	1.62297	0.104596	0.167241	61.2665	0.198195	0.279466	0.70919	0.478207	0.682578	-0.41906	-0.466558
WBGene00000815	csn-3	Y38C1AA.2	53.1967	5.84145	0.179358	32.5687	1.13805e-232	2.40881e-232	53.1967	0.215661	0.251948	0.855974	0.392012	0.99478	53.1967	-1.34314	0.292194	-4.59674	4.29147e-06	1.0973e-05	53.1967	0.433376	0.2495	1.73698	0.0823907	0.137915	53.1967	0.1501	0.413444	0.363048	0.716569	0.846603	-1.12748	-1.19304
WBGene00000816	csn-4	Y55F3AM.15	29.0295	5.13413	0.217565	23.5981	4.03033e-123	5.95679e-123	29.0295	-0.0886985	0.307073	-0.288851	0.772695	0.99478	29.0295	-1.53544	0.388064	-3.95668	7.59993e-05	0.000160219	29.0295	0.23305	0.307448	0.758015	0.448442	0.546731	29.0295	0.939091	0.5252	1.78806	0.0737659	0.217638	-1.62414	-0.596353
WBGene00000817	csn-5	B0547.1	74.1637	6.48436	0.154679	41.9213	0	0	74.1637	0.0398097	0.218	0.182614	0.855101	0.99478	74.1637	-1.06329	0.254462	-4.17857	2.93347e-05	6.60054e-05	74.1637	-0.0338291	0.218534	-0.1548	0.876979	0.910889	74.1637	0.647888	0.350241	1.84983	0.0643375	0.199641	-1.02348	-0.415401
WBGene00000818	csn-6	Y67H2A.6	51.081	5.81431	0.211279	27.5196	1.0224e-166	1.75598e-166	51.081	-0.00356261	0.298079	-0.0119519	0.990464	0.998148	51.081	-1.30714	0.335009	-3.9018	9.54796e-05	0.000196794	51.081	0.179266	0.293129	0.611562	0.540827	0.632335	51.081	1.16344	0.460225	2.52798	0.0114722	0.0604178	-1.3107	-0.143698
WBGene00000822	csq-1	F40E10.3	182.772	6.20399	0.141794	43.7535	0	0	182.772	-0.126145	0.200249	-0.629942	0.528733	0.99478	182.772	1.97919	0.186347	10.621	2.38043e-26	4.33109e-25	182.772	0.535281	0.198304	2.69929	0.00694874	0.0164501	182.772	-1.04104	0.27416	-3.79719	0.000146343	0.00248351	1.85305	0.938151
WBGene00000829	ctb-1	MTCE.21	389.355	8.9034	0.0971167	91.6773	0	0	389.355	-0.134654	0.137292	-0.980786	0.326698	0.99478	389.355	1.57402	0.138834	11.3375	8.55731e-30	1.9941e-28	389.355	-1.44685	0.141226	-10.2449	1.24696e-24	4.26448e-23	389.355	-0.386283	0.19426	-1.98848	0.0467586	0.16088	1.43937	1.18774
WBGene00000831	ctl-2	Y54G11A.5	83.0297	4.9523	0.132668	37.3285	5.6597e-305	1.5214e-304	83.0297	0.305323	0.182485	1.67314	0.0942995	0.954102	83.0297	2.42218	0.210522	11.5056	1.23674e-30	3.11801e-29	83.0297	-0.0773509	0.216863	-0.356681	0.721331	0.790926	83.0297	-0.57815	0.25648	-2.25417	0.0241855	0.100814	2.7275	1.84403
WBGene00000832	ctn-1	Y23H5A.5	21.5564	4.86505	0.189232	25.7094	9.18156e-146	1.46965e-145	21.5564	-0.387531	0.269547	-1.43771	0.150516	0.973531	21.5564	1.14732	0.370905	3.0933	0.00197944	0.00331268	21.5564	-1.33916	0.333702	-4.01304	5.99423e-05	0.000247371	21.5564	0.121904	0.461149	0.264348	0.791512	0.890209	0.75979	1.26922
WBGene00000833	cts-1	T20G5.2	409.154	8.60872	0.0831304	103.557	0	0	409.154	0.165443	0.117086	1.41301	0.157653	0.973531	409.154	-0.255157	0.116807	-2.18443	0.0289309	0.0397827	409.154	0.275608	0.11457	2.40559	0.0161464	0.0342247	409.154	-0.343946	0.171522	-2.00526	0.0449357	0.15657	-0.0897142	-0.599103
WBGene00000834	cua-1	Y76A2A.2	91.9989	6.78245	0.0888995	76.2934	0	0	91.9989	-0.0938552	0.125261	-0.749278	0.453689	0.99478	91.9989	0.450657	0.167541	2.68984	0.00714862	0.0109105	91.9989	-0.598124	0.145186	-4.11971	3.79357e-05	0.000164648	91.9989	-0.211222	0.223499	-0.945072	0.344622	0.569302	0.356802	0.239435
WBGene00000835	cuc-1	ZK652.11	29.7063	5.4691	0.204841	26.6992	4.80244e-157	7.96846e-157	29.7063	0.117867	0.288184	0.408999	0.682541	0.99478	29.7063	0.941976	0.369989	2.54595	0.0108979	0.0161329	29.7063	-1.61199	0.337155	-4.78114	1.74303e-06	1.00592e-05	29.7063	-0.323029	0.475462	-0.679399	0.496885	0.69624	1.05984	0.618948
WBGene00000836	cul-1	D2045.6	67.0655	6.63617	0.134836	49.2166	0	0	67.0655	0.144133	0.18959	0.760238	0.447113	0.99478	67.0655	-0.351187	0.241622	-1.45346	0.146097	0.177154	67.0655	-0.793269	0.20385	-3.89144	9.96514e-05	0.000388867	67.0655	-0.206576	0.332958	-0.620426	0.534977	0.725646	-0.207053	-0.557762
WBGene00000837	cul-2	ZK520.4	92.2673	6.73096	0.134083	50.1998	0	0	92.2673	-0.0210395	0.189079	-0.111274	0.911399	0.995157	92.2673	-0.709331	0.211428	-3.35495	0.000793793	0.00141842	92.2673	0.105965	0.189281	0.559831	0.575595	0.662602	92.2673	-0.0219594	0.304022	-0.0722297	0.942419	0.971608	-0.73037	-0.73129
WBGene00000838	cul-3	Y108G3AL.1	61.3654	5.93499	0.105827	56.082	0	0	61.3654	0.113281	0.147557	0.767713	0.442658	0.99478	61.3654	-1.22823	0.21547	-5.70026	1.19624e-08	4.40071e-08	61.3654	0.520186	0.156187	3.33052	0.000866826	0.00266358	61.3654	0.532687	0.285045	1.86878	0.0616528	0.194081	-1.11495	-0.695546
WBGene00000839	cul-4	F45E12.3	38.6419	5.72004	0.145044	39.4367	0	0	38.6419	-0.0903215	0.204516	-0.441637	0.658752	0.99478	38.6419	-0.476917	0.278689	-1.71129	0.0870276	0.110092	38.6419	-0.403217	0.223512	-1.80401	0.0712302	0.121913	38.6419	0.116694	0.379949	0.307131	0.758744	0.871196	-0.567239	-0.360223
WBGene00000840	cul-5	ZK856.1	38.3388	5.64093	0.190377	29.6303	6.0814e-193	1.14134e-192	38.3388	0.0720893	0.267995	0.268995	0.787933	0.99478	38.3388	-0.402573	0.3203	-1.25686	0.208804	0.246396	38.3388	-0.42573	0.279208	-1.52477	0.127315	0.197497	38.3388	-0.0148273	0.44496	-0.0333227	0.973417	0.987613	-0.330483	-0.4174
WBGene00000843	cup-2	F25D7.1	74.3449	6.27321	0.160283	39.1383	0	0	74.3449	0.0111653	0.225936	0.0494178	0.960586	0.997385	74.3449	-0.615547	0.241629	-2.54748	0.0108503	0.0160785	74.3449	0.29432	0.223643	1.31602	0.188166	0.272867	74.3449	0.0333446	0.348416	0.0957034	0.923756	0.963648	-0.604381	-0.582202
WBGene00000846	cup-5	R13A5.1	58.3209	5.68476	0.11898	47.779	0	0	58.3209	0.0808536	0.166258	0.486315	0.626744	0.99478	58.3209	-1.16934	0.228664	-5.11379	3.15761e-07	9.54778e-07	58.3209	0.632181	0.172866	3.65705	0.000255136	0.000907848	58.3209	0.884463	0.298617	2.96186	0.00305785	0.0234806	-1.08849	-0.284878
WBGene00000854	cux-7	C07H6.8	45.4015	6.02122	0.105914	56.85	0	0	45.4015	0.163959	0.14751	1.11151	0.266348	0.993234	45.4015	-1.19301	0.255567	-4.66809	3.04013e-06	7.94545e-06	45.4015	-0.221255	0.169008	-1.30914	0.190486	0.275528	45.4015	-0.250396	0.356796	-0.701791	0.48281	0.684932	-1.02905	-1.4434
WBGene00000863	cya-1	ZK507.6	37.9379	5.83446	0.174299	33.4738	1.15997e-245	2.56856e-245	37.9379	-0.0391372	0.245799	-0.159224	0.873492	0.99478	37.9379	-1.97181	0.365044	-5.40157	6.60607e-08	2.21713e-07	37.9379	-0.183596	0.252098	-0.728271	0.466448	0.562483	37.9379	0.834873	0.484135	1.72447	0.0846239	0.238448	-2.01094	-1.13693
WBGene00000865	cyb-1	ZC168.4	218.469	8.13994	0.110673	73.5491	0	0	218.469	0.202437	0.155973	1.2979	0.194323	0.981054	218.469	-1.95528	0.183551	-10.6525	1.69712e-26	3.11856e-25	218.469	0.0158283	0.152505	0.103788	0.917337	0.940722	218.469	1.01629	0.250549	4.05625	4.98676e-05	0.00108078	-1.75284	-0.938992
WBGene00000866	cyb-2.1	Y43E12A.1	92.6304	6.28488	0.174039	36.1119	1.47654e-285	3.74946e-285	92.6304	0.240536	0.244772	0.982695	0.325758	0.99478	92.6304	-2.80819	0.285265	-9.84414	7.26579e-23	1.01845e-21	92.6304	1.34693	0.233413	5.77059	7.89955e-09	7.23995e-08	92.6304	0.90867	0.396508	2.29168	0.021924	0.0947364	-2.56765	-1.89952
WBGene00000867	cyb-2.2	H31G24.4	135.035	7.12505	0.130271	54.6938	0	0	135.035	0.216639	0.183268	1.18209	0.237171	0.993234	135.035	-2.60313	0.227621	-11.4362	2.75596e-30	6.74116e-29	135.035	0.798426	0.177172	4.50649	6.59088e-06	3.40467e-05	135.035	1.08668	0.308089	3.52717	0.000420022	0.00530325	-2.38649	-1.51645
WBGene00000868	cyb-3	T06E6.2	460.336	9.18282	0.23544	39.0028	0	0	460.336	0.230323	0.332831	0.692011	0.48893	0.99478	460.336	-2.52358	0.303575	-8.31287	9.34127e-17	8.10858e-16	460.336	0.282945	0.312605	0.905121	0.365401	0.464901	460.336	1.03733	0.454067	2.28454	0.02234	0.0960564	-2.29326	-1.48625
WBGene00000869	cyc-1	C54G4.8	103.639	6.34085	0.109552	57.8796	0	0	103.639	0.191286	0.153055	1.24978	0.211379	0.988437	103.639	0.102503	0.166131	0.617001	0.537234	0.577076	103.639	0.578799	0.156557	3.69705	0.000218122	0.000788293	103.639	-0.852088	0.245428	-3.47184	0.000516899	0.00622157	0.293788	-0.749585
WBGene00000871	cye-1	C37A2.4	41.9208	5.74266	0.180988	31.7295	6.08197e-221	1.24281e-220	41.9208	0.0884232	0.25467	0.347207	0.728436	0.99478	41.9208	-2.12423	0.353961	-6.0013	1.95745e-09	7.96678e-09	41.9208	0.22853	0.255035	0.896072	0.370214	0.469731	41.9208	0.884607	0.471274	1.87705	0.0605106	0.191727	-2.0358	-1.23962
WBGene00000872	cyk-1	F11H8.4	51.9981	5.44459	0.167041	32.5945	4.91508e-233	1.04302e-232	51.9981	-0.0386882	0.235269	-0.164442	0.869383	0.99478	51.9981	0.841634	0.263172	3.19804	0.00138364	0.00237641	51.9981	-0.292838	0.251879	-1.16262	0.244985	0.337641	51.9981	0.115468	0.352928	0.32717	0.743539	0.863537	0.802946	0.957101
WBGene00000874	cyk-3	ZK328.1	60.8752	5.95186	0.110716	53.7578	0	0	60.8752	-0.0178968	0.155407	-0.115161	0.908318	0.995157	60.8752	-0.49521	0.205622	-2.40835	0.0160248	0.0230706	60.8752	0.224775	0.166749	1.34798	0.177664	0.260139	60.8752	0.281278	0.277501	1.01361	0.31077	0.536749	-0.513107	-0.213932
WBGene00000875	cyk-4	K08E3.6	116.61	7.16347	0.1062	67.4527	0	0	116.61	-0.0220397	0.149683	-0.147243	0.88294	0.995157	116.61	-2.26606	0.21078	-10.7508	5.87361e-27	1.11252e-25	116.61	0.396962	0.148956	2.66496	0.00769985	0.0179825	116.61	1.08655	0.279195	3.89175	9.95247e-05	0.00183659	-2.2881	-1.1795
WBGene00000876	cyl-1	C52E4.6	49.2593	6.28304	0.126656	49.607	0	0	49.2593	-0.0885186	0.178642	-0.495509	0.620241	0.99478	49.2593	-0.968255	0.266838	-3.62862	0.00028494	0.00055	49.2593	-0.588538	0.196123	-3.00086	0.00269217	0.00717945	49.2593	0.189709	0.364217	0.520869	0.602458	0.773874	-1.05677	-0.778545
WBGene00000877	cyn-1	Y49A3A.5	52.96	5.6643	0.119346	47.4613	0	0	52.96	0.283444	0.165443	1.71324	0.0866682	0.954102	52.96	-0.512825	0.219346	-2.33798	0.0193884	0.0274688	52.96	0.339915	0.178495	1.90434	0.0568657	0.101564	52.96	-0.321032	0.304512	-1.05425	0.291768	0.517682	-0.229381	-0.833858
WBGene00000879	cyn-3	Y75B12B.5	144.274	7.02744	0.103016	68.2167	0	0	144.274	0.176017	0.144496	1.21814	0.223172	0.993234	144.274	-0.0711561	0.157863	-0.450747	0.652172	0.684512	144.274	0.239281	0.147204	1.6255	0.104055	0.166773	144.274	-0.21504	0.223636	-0.961563	0.336269	0.561417	0.10486	-0.286197
WBGene00000880	cyn-4	F59E10.2	42.0982	6.20493	0.132785	46.7293	0	0	42.0982	-0.150962	0.187609	-0.804659	0.421016	0.99478	42.0982	0.158766	0.28979	0.547865	0.583784	0.620308	42.0982	-1.56018	0.231784	-6.73118	1.68288e-11	2.18095e-10	42.0982	0.331887	0.363177	0.913845	0.360799	0.584418	0.00780445	0.490653
WBGene00000881	cyn-5	F31C3.1	337.872	7.7111	0.074484	103.527	0	0	337.872	-0.0702857	0.10498	-0.669516	0.503167	0.99478	337.872	1.53287	0.107612	14.2444	4.85733e-46	2.54476e-44	337.872	0.031135	0.109586	0.284114	0.776323	0.835353	337.872	-0.639599	0.15094	-4.23745	2.26073e-05	0.00057823	1.46259	0.893276
WBGene00000882	cyn-6	F42G9.2	31.4024	5.47643	0.167372	32.7202	8.07084e-235	1.72559e-234	31.4024	-0.125719	0.236303	-0.532022	0.594711	0.99478	31.4024	2.39175	0.380676	6.28291	3.32293e-10	1.47692e-09	31.4024	-2.6019	0.35848	-7.25813	3.92464e-13	6.03986e-12	31.4024	-0.250195	0.397797	-0.628952	0.529381	0.722279	2.26603	2.14156
WBGene00000883	cyn-7	Y75B12B.2	630.328	9.4177	0.0686927	137.099	0	0	630.328	0.0959603	0.0968754	0.990554	0.321903	0.99478	630.328	0.375195	0.0978012	3.8363	0.0001249	0.000254169	630.328	-0.445705	0.0967638	-4.60611	4.10266e-06	2.2111e-05	630.328	-0.16631	0.139987	-1.18803	0.23482	0.456489	0.471156	0.208885
WBGene00000884	cyn-8	D1009.2	32.5327	5.88044	0.151945	38.7012	0	0	32.5327	0.278414	0.212662	1.30918	0.190472	0.981054	32.5327	-0.250663	0.401202	-0.62478	0.532116	0.572243	32.5327	-2.07976	0.286496	-7.25928	3.89149e-13	6.0139e-12	32.5327	0.602517	0.465964	1.29305	0.195992	0.409219	0.0277509	0.351854
WBGene00000885	cyn-9	T27D1.1	26.4501	4.97408	0.233979	21.2586	2.74396e-100	3.74047e-100	26.4501	0.150217	0.328862	0.456778	0.647831	0.99478	26.4501	-1.29171	0.384961	-3.35543	0.000792403	0.00141662	26.4501	0.422272	0.326724	1.29244	0.196204	0.282031	26.4501	-0.874327	0.595909	-1.46722	0.142318	0.334485	-1.14149	-2.16604
WBGene00000886	cyn-10	B0252.4	30.3783	4.93782	0.177958	27.747	1.89245e-169	3.2762e-169	30.3783	-0.312232	0.252857	-1.23482	0.216899	0.993234	30.3783	-2.98779	0.421725	-7.08467	1.39375e-12	8.25634e-12	30.3783	1.02646	0.247003	4.15567	3.24335e-05	0.000143122	30.3783	1.9556	0.529031	3.69656	0.000218537	0.00323481	-3.30002	-1.03219
WBGene00000887	cyn-11	T01B7.4	28.4956	4.66502	0.185637	25.1297	2.35506e-139	3.6842e-139	28.4956	0.356885	0.257698	1.38489	0.166085	0.973531	28.4956	-0.920372	0.323286	-2.84693	0.0044143	0.00696167	28.4956	0.658325	0.265592	2.47871	0.0131858	0.0287156	28.4956	-0.169567	0.452062	-0.375096	0.707589	0.841172	-0.563487	-1.08994
WBGene00000888	cyn-12	C34D4.12	37.5217	4.71546	0.171377	27.5151	1.15878e-166	1.98975e-166	37.5217	0.225079	0.238366	0.944257	0.345038	0.99478	37.5217	-1.161	0.289282	-4.01337	5.98584e-05	0.000128689	37.5217	1.13364	0.238634	4.75055	2.02864e-06	1.15898e-05	37.5217	0.45456	0.397841	1.14257	0.253218	0.47582	-0.935917	-0.706435
WBGene00000889	cyn-13	Y116A8C.34	72.8379	6.05228	0.127683	47.4007	0	0	72.8379	-0.0624365	0.179871	-0.347118	0.728502	0.99478	72.8379	-0.884499	0.214071	-4.13181	3.59915e-05	7.99608e-05	72.8379	0.569606	0.181347	3.14096	0.00168393	0.00476963	72.8379	0.585274	0.295375	1.98146	0.04754	0.162444	-0.946936	-0.299225
WBGene00000890	sig-7	F39H2.2	43.6307	5.5845	0.142512	39.1862	0	0	43.6307	0.00634823	0.200221	0.0317061	0.974706	0.998148	43.6307	-1.50633	0.2822	-5.3378	9.40817e-08	3.0765e-07	43.6307	0.418279	0.206143	2.02907	0.0424509	0.0788694	43.6307	0.666138	0.37791	1.76269	0.0779533	0.225631	-1.49998	-0.84019
WBGene00000891	cyn-15	Y87G2A.6	40.5709	5.95514	0.16928	35.1792	4.1583e-271	1.01144e-270	40.5709	-0.088986	0.238956	-0.372395	0.709599	0.99478	40.5709	-0.509069	0.308274	-1.65135	0.0986669	0.123576	40.5709	-0.742221	0.255233	-2.90801	0.00363736	0.00937843	40.5709	0.350619	0.416056	0.842721	0.399385	0.619229	-0.598055	-0.15845
WBGene00000892	cyn-16	Y17G7B.9	20.0551	4.92051	0.194863	25.2511	1.10157e-140	1.73318e-140	20.0551	0.222784	0.272557	0.817385	0.413708	1	20.0551	-0.951257	0.422823	-2.24978	0.024463	0.034083	20.0551	-0.610464	0.305786	-1.99637	0.0458932	0.084563	20.0551	-0.301863	0.585803	-0.515297	0.606345	0.777145	-0.728473	-1.25312
WBGene00000894	dab-1	M110.5	143.627	7.17192	0.128379	55.8652	0	0	143.627	0.242497	0.180557	1.34305	0.179255	0.981054	143.627	-0.620517	0.192555	-3.22255	0.00127053	0.00219851	143.627	0.118211	0.179036	0.660267	0.509082	0.602659	143.627	0.335411	0.271011	1.23763	0.215855	0.435024	-0.378021	-0.285107
WBGene00000896	dad-1	F57B10.10	75.3186	6.16777	0.149831	41.1647	0	0	75.3186	0.164432	0.210452	0.781329	0.434609	0.99478	75.3186	0.0885403	0.223845	0.395543	0.692442	0.722774	75.3186	0.139139	0.213296	0.652331	0.514188	0.60738	75.3186	-0.57983	0.324376	-1.78752	0.0738534	0.217803	0.252972	-0.491289
WBGene00000897	daf-1	F29C4.1	20.7399	5.07925	0.246571	20.5995	2.77105e-94	3.70627e-94	20.7399	-0.17284	0.348632	-0.495764	0.620061	0.99478	20.7399	0.260928	0.416024	0.627195	0.530531	0.570789	20.7399	-1.02504	0.375236	-2.73171	0.00630061	0.0151506	20.7399	-0.907155	0.618423	-1.46688	0.142407	0.334485	0.0880887	-0.646227
WBGene00000898	daf-2	Y55D5A.5	46.867	6.07084	0.18344	33.0944	3.57933e-240	7.80415e-240	46.867	-0.192034	0.259453	-0.740149	0.459209	0.99478	46.867	-0.462959	0.295759	-1.56533	0.117506	0.145081	46.867	-0.420564	0.264097	-1.59246	0.111281	0.176364	46.867	-0.116384	0.42725	-0.272404	0.785311	0.886198	-0.654993	-0.579343
WBGene00000899	daf-3	F25E2.5	28.1488	5.29622	0.27628	19.1698	6.62175e-82	8.44962e-82	28.1488	-0.186896	0.390731	-0.478325	0.632419	0.99478	28.1488	0.509232	0.421082	1.20934	0.226531	0.265701	28.1488	-0.997664	0.403849	-2.47039	0.0134966	0.029289	28.1488	-0.227199	0.595219	-0.381706	0.702679	0.839349	0.322336	0.282033
WBGene00000900	daf-4	C05D2.1	26.9728	5.2542	0.243916	21.541	6.43178e-103	8.83607e-103	26.9728	0.0468437	0.343802	0.136252	0.891622	0.995157	26.9728	0.0263491	0.413081	0.0637866	0.94914	0.955632	26.9728	-1.03518	0.367394	-2.81762	0.0048381	0.0120295	26.9728	0.478354	0.546264	0.875684	0.381202	0.603968	0.0731928	0.504704
WBGene00000901	daf-5	W01G7.1	28.8018	5.01905	0.265035	18.9373	5.62106e-80	7.13818e-80	28.8018	-0.124683	0.374475	-0.332954	0.739169	0.99478	28.8018	0.718838	0.396042	1.81506	0.0695154	0.0895709	28.8018	-0.614313	0.386279	-1.59033	0.11176	0.176936	28.8018	-0.344035	0.560623	-0.613665	0.539437	0.728526	0.594155	0.374804
WBGene00000908	daf-12	F11A1.3	21.5237	4.5873	0.277246	16.5459	1.7132e-61	2.03561e-61	21.5237	-0.320117	0.393141	-0.814255	0.415499	0.99478	21.5237	0.552576	0.419377	1.31761	0.187634	0.222945	21.5237	-0.368393	0.404152	-0.911521	0.362021	0.461237	21.5237	-0.138668	0.596826	-0.232343	0.816272	0.902974	0.232459	0.413908
WBGene00000910	daf-14	F01G10.8	12.6867	4.04032	0.224963	17.9599	4.01328e-72	4.96835e-72	12.6867	-0.37554	0.32082	-1.17056	0.241774	1	12.6867	1.92823	0.48726	3.9573	7.58031e-05	0.000159896	12.6867	-1.75081	0.451623	-3.87671	0.00010588	0.000410356	12.6867	-0.218819	0.558942	-0.391488	0.695436	1	1.55269	1.70941
WBGene00000911	daf-15	C10C5.6	146.265	7.49165	0.10606	70.6361	0	0	146.265	0.141298	0.149227	0.94687	0.343705	0.99478	146.265	-0.69734	0.1733	-4.02389	5.72444e-05	0.000123428	146.265	-0.194528	0.151772	-1.28171	0.199943	0.286681	146.265	0.194698	0.24079	0.80858	0.418757	0.634704	-0.556042	-0.502642
WBGene00000912	daf-16	R13H8.1	102.979	6.16056	0.146849	41.9518	0	0	102.979	-0.753612	0.210944	-3.57256	0.000353507	0.147083	102.979	0.666987	0.200282	3.33025	0.00086769	0.00153856	102.979	0.621857	0.204087	3.04702	0.00231124	0.00628846	102.979	-0.198961	0.30335	-0.65588	0.511901	0.709279	-0.0866247	0.468026
WBGene00000913	daf-18	T07A9.6	200.761	7.94256	0.138364	57.4033	0	0	200.761	0.145151	0.195245	0.743433	0.45722	0.99478	200.761	-2.16506	0.210331	-10.2936	7.53157e-25	1.23361e-23	200.761	0.370596	0.187151	1.98019	0.047682	0.0874881	200.761	0.694908	0.299737	2.31839	0.0204281	0.0898915	-2.01991	-1.47015
WBGene00000915	hsp-90	C47E8.5	1315.54	10.3022	0.0701372	146.886	0	0	1315.54	0.269287	0.0989696	2.72091	0.00651024	0.747418	1315.54	-0.618593	0.0925588	-6.68325	2.33701e-11	1.19802e-10	1315.54	0.346786	0.0944134	3.67306	0.000239666	0.000858173	1315.54	-0.0862422	0.137763	-0.626019	0.531303	0.7232	-0.349306	-0.704835
WBGene00000917	daf-25	Y48G1A.3	21.1409	4.9525	0.173097	28.6112	4.87907e-180	8.79495e-180	21.1409	-0.188949	0.24481	-0.771819	0.440222	0.99478	21.1409	-0.548876	0.368423	-1.4898	0.136277	0.166228	21.1409	-0.549519	0.278074	-1.97616	0.0481366	0.0882565	21.1409	0.373842	0.488065	0.765967	0.443696	0.653705	-0.737825	-0.175034
WBGene00000923	daf-31	K07H8.3	66.7551	5.80459	0.151823	38.2326	0	0	66.7551	0.117814	0.213097	0.552864	0.580357	0.99478	66.7551	-0.866822	0.236948	-3.65828	0.000253915	0.000493079	66.7551	0.754559	0.211284	3.5713	0.000355211	0.00121326	66.7551	0.301544	0.334708	0.900915	0.367633	0.59218	-0.749009	-0.565278
WBGene00000929	dao-3	K07E3.3	39.6139	5.49891	0.196672	27.9597	5.02337e-172	8.77456e-172	39.6139	-0.275371	0.278657	-0.988209	0.32305	0.99478	39.6139	1.2262	0.310683	3.9468	7.9204e-05	0.000166547	39.6139	-0.91018	0.30179	-3.01594	0.00256185	0.00687408	39.6139	-0.307953	0.423806	-0.726637	0.467448	0.673021	0.950832	0.91825
WBGene00000931	dao-5	C25A1.10	155.188	7.52526	0.111039	67.7712	0	0	155.188	0.178289	0.156249	1.14106	0.253846	0.993234	155.188	0.246874	0.17393	1.41938	0.155787	0.187855	155.188	-0.691374	0.162761	-4.24778	2.15898e-05	9.93667e-05	155.188	-0.0125891	0.238597	-0.0527629	0.957921	0.980554	0.425163	0.234285
WBGene00000933	dap-3	C14A4.2	42.8344	5.76341	0.119996	48.0299	0	0	42.8344	-0.0933133	0.168999	-0.552153	0.580843	0.99478	42.8344	-0.62144	0.257349	-2.41477	0.0157451	0.0226913	42.8344	-0.308423	0.191674	-1.6091	0.107594	0.171292	42.8344	0.584059	0.331907	1.7597	0.0784579	0.22658	-0.714753	-0.0373809
WBGene00000935	daz-1	F56D1.7	125.628	6.98509	0.178704	39.0874	0	0	125.628	0.17944	0.252017	0.712015	0.476455	0.99478	125.628	-2.27216	0.265931	-8.54418	1.29453e-17	1.22285e-16	125.628	0.833816	0.240223	3.471	0.000518515	0.00170462	125.628	0.815265	0.379957	2.14568	0.0318988	0.123015	-2.09272	-1.4569
WBGene00000937	dbr-1	C55B7.8	36.2493	5.71782	0.158052	36.1768	1.41028e-286	3.59355e-286	36.2493	-0.264906	0.224003	-1.1826	0.236969	0.993234	36.2493	-1.38035	0.310214	-4.44967	8.60004e-06	2.09873e-05	36.2493	-0.0328	0.231238	-0.141845	0.887203	0.917266	36.2493	0.139145	0.446567	0.311588	0.755354	0.869313	-1.64526	-1.24121
WBGene00000938	dcp-66	C26C6.5	42.5834	5.47967	0.136722	40.0789	0	0	42.5834	0.18007	0.190691	0.944302	0.345015	0.99478	42.5834	-0.916959	0.257265	-3.56426	0.000364883	0.000690241	42.5834	0.362658	0.201276	1.8018	0.0715771	0.122337	42.5834	-0.201093	0.362064	-0.555406	0.578617	0.756377	-0.736889	-1.11805
WBGene00000939	dcr-1	K12H4.8	75.9682	6.80448	0.122927	55.3538	0	0	75.9682	0.0427222	0.173078	0.246837	0.805034	0.99478	75.9682	-0.843184	0.229621	-3.67207	0.000240592	0.000468808	75.9682	-0.555402	0.183344	-3.02929	0.0024513	0.00660385	75.9682	0.310266	0.310299	0.999893	0.317362	0.543601	-0.800462	-0.532918
WBGene00000940	dcs-1	Y113G7A.9	18.8427	4.65506	0.264634	17.5905	2.91207e-69	3.56268e-69	18.8427	0.191462	0.371763	0.515012	0.606545	1	18.8427	-1.2547	0.495802	-2.53065	0.011385	0.0167833	18.8427	-0.310079	0.385634	-0.804077	0.421353	0.520577	18.8427	0.838432	0.648985	1.29191	0.196387	0.409798	-1.06324	-0.41627
WBGene00000941	ddp-1	Y39A3CR.4	27.5817	4.43683	0.175889	25.2252	2.11942e-140	3.3318e-140	27.5817	0.26125	0.243651	1.07223	0.283617	0.99478	27.5817	-0.00947348	0.304759	-0.0310852	0.975202	0.978707	27.5817	0.349591	0.264819	1.32011	0.186797	0.271118	27.5817	0.0411336	0.405809	0.101362	0.919263	0.961998	0.251777	0.0316601
WBGene00000942	deb-1	ZC477.9	56.9794	4.92762	0.203477	24.2171	1.46983e-129	2.22265e-129	56.9794	-0.316249	0.28885	-1.09485	0.273581	0.993234	56.9794	1.34449	0.278924	4.82026	1.43371e-06	3.93711e-06	56.9794	0.45124	0.288536	1.5639	0.117842	0.184819	56.9794	-0.338596	0.40451	-0.837053	0.402563	0.621113	1.02824	1.00589
WBGene00000959	dgk-2	F46H6.2	31.4647	5.46623	0.168593	32.4227	1.31402e-230	2.76228e-230	31.4647	-0.422479	0.240132	-1.75936	0.0785165	0.942349	31.4647	1.15554	0.315753	3.65963	0.000252579	0.000490742	31.4647	-1.376	0.288159	-4.77513	1.79587e-06	1.0348e-05	31.4647	-0.0421236	0.405165	-0.103966	0.917196	0.961295	0.73306	1.11341
WBGene00000961	dgn-1	T21B6.1	57.8018	6.23228	0.102662	60.707	0	0	57.8018	-0.378063	0.146484	-2.58092	0.00985379	0.747418	57.8018	1.0242	0.203181	5.04083	4.63508e-07	1.37012e-06	57.8018	-0.981112	0.180727	-5.42871	5.67641e-08	4.45607e-07	57.8018	-0.331386	0.267569	-1.2385	0.215529	0.434962	0.646138	0.692815
WBGene00000962	dhc-1	T21E12.4	253.883	7.93933	0.0748163	106.118	0	0	253.883	0.0598348	0.105192	0.568816	0.569481	0.99478	253.883	0.450244	0.115053	3.91336	9.10223e-05	0.000188501	253.883	-0.0814105	0.109463	-0.743724	0.457044	0.554381	253.883	-0.63978	0.164856	-3.88085	0.000104093	0.00189964	0.510079	-0.189535
WBGene00000963	dhp-1	R06C7.3	15.4383	3.45408	0.310539	11.1229	9.71172e-29	1.03836e-28	15.4383	-0.547437	0.445106	-1.2299	0.218734	1	15.4383	1.33556	0.471327	2.83361	0.00460253	0.00722919	15.4383	-0.129774	0.467964	-0.277316	0.781537	0.839374	15.4383	0.113659	0.648767	0.175192	0.860929	0.930597	0.788121	1.44922
WBGene00000965	dhs-1	C01G8.3	38.6365	5.35613	0.149492	35.8289	3.91581e-281	9.82209e-281	38.6365	-0.296355	0.212328	-1.39574	0.162793	0.973531	38.6365	-1.58535	0.306516	-5.17215	2.31415e-07	7.13167e-07	38.6365	0.420062	0.217264	1.93342	0.0531849	0.0959519	38.6365	1.47203	0.395314	3.72369	0.000196332	0.00300856	-1.8817	-0.11332
WBGene00000966	dhs-2	F55A12.4	38.5669	4.84439	0.145931	33.1964	1.2118e-241	2.65389e-241	38.5669	-0.47596	0.210083	-2.26558	0.0234774	0.769638	38.5669	5.20744	0.511871	10.1734	2.60754e-24	4.07228e-23	38.5669	-3.47843	0.511615	-6.79892	1.05404e-11	1.40292e-10	38.5669	-0.842631	0.32808	-2.56837	0.0102178	0.0556223	4.73148	4.36481
WBGene00000967	dhs-3	T02E1.5	121.684	5.30989	0.1329	39.9539	0	0	121.684	-0.264227	0.188675	-1.40043	0.161384	0.973531	121.684	3.14936	0.201693	15.6146	5.78989e-55	4.36427e-53	121.684	-0.21955	0.213247	-1.02956	0.303217	0.401842	121.684	-0.684623	0.256225	-2.67196	0.00754095	0.0448331	2.88513	2.46474
WBGene00000969	dhs-5	F56D1.5	21.6923	4.90392	0.196619	24.9412	2.6605e-137	4.13228e-137	21.6923	-0.642314	0.282549	-2.27329	0.023009	0.769638	21.6923	0.715404	0.401801	1.78049	0.0749955	0.0960124	21.6923	-1.44609	0.345253	-4.1885	2.808e-05	0.000126019	21.6923	1.49057	0.470904	3.16533	0.00154909	0.0141617	0.0730902	2.20597
WBGene00000970	dhs-6	C17G10.8	49.5155	5.79995	0.127827	45.3735	0	0	49.5155	0.107469	0.178903	0.600711	0.548032	0.99478	49.5155	-0.334279	0.242963	-1.37584	0.16887	0.202244	49.5155	-0.206594	0.197574	-1.04565	0.295721	0.3941	49.5155	0.260255	0.319489	0.814599	0.415302	0.630842	-0.22681	-0.0740238
WBGene00000973	dhs-9	Y32H12A.3	25.6212	5.4623	0.201418	27.1192	5.84728e-162	9.89551e-162	25.6212	-0.237958	0.28515	-0.834502	0.403998	0.99478	25.6212	0.676556	0.418676	1.61594	0.106106	0.132021	25.6212	-2.07738	0.356752	-5.82304	5.77874e-09	5.40348e-08	25.6212	1.03776	0.488205	2.12566	0.0335312	0.127969	0.438599	1.71432
WBGene00000974	dhs-11	Y39A1A.11	26.1964	4.36894	0.176092	24.8106	6.88739e-136	1.06282e-135	26.1964	0.225609	0.244063	0.924387	0.355285	0.99478	26.1964	-1.00144	0.332274	-3.01391	0.00257902	0.00423548	26.1964	0.728253	0.256131	2.84328	0.0044652	0.0112192	26.1964	0.726125	0.433004	1.67695	0.0935529	0.254237	-0.775835	-0.275319
WBGene00000975	dhs-12	K08F4.9	52.893	5.5494	0.17366	31.9555	4.52953e-224	9.35672e-224	52.893	0.126617	0.243866	0.519207	0.603616	0.99478	52.893	0.78553	0.260476	3.01575	0.00256344	0.0042127	52.893	-0.119637	0.254236	-0.470576	0.637944	0.719574	52.893	-0.809055	0.371888	-2.17554	0.02959	0.116369	0.912147	-0.023525
WBGene00000976	dhs-13	F36H9.3	40.2887	4.85219	0.173552	27.9582	5.24142e-172	9.15329e-172	40.2887	-0.0862242	0.244466	-0.352704	0.72431	0.99478	40.2887	-0.81698	0.271317	-3.01116	0.00260248	0.00427307	40.2887	1.13663	0.240405	4.72799	2.26754e-06	1.27865e-05	40.2887	0.111059	0.394689	0.281383	0.778417	0.882361	-0.903204	-0.705922
WBGene00000977	dhs-14	R05D8.8	84.2713	5.24381	0.203053	25.8249	4.65981e-147	7.48794e-147	84.2713	0.24623	0.284734	0.864775	0.387162	0.99478	84.2713	3.60639	0.31834	11.3287	9.4569e-30	2.18991e-28	84.2713	-1.32437	0.331619	-3.99366	6.50625e-05	0.000265241	84.2713	-0.933471	0.389021	-2.39954	0.0164158	0.0774824	3.85262	2.67292
WBGene00000980	dhs-17	F29G9.6	22.8504	5.25446	0.151485	34.6864	1.26207e-263	2.9881e-263	22.8504	-0.211462	0.214437	-0.986127	0.324071	0.99478	22.8504	-1.35123	0.404541	-3.34016	0.000837314	0.00148934	22.8504	-0.697784	0.250559	-2.78491	0.00535427	0.0131533	22.8504	1.12247	0.501438	2.2385	0.0251886	0.103937	-1.56269	-0.228762
WBGene00000981	dhs-18	C45B11.3	54.9653	5.02751	0.160052	31.4117	1.40206e-216	2.83055e-216	54.9653	-0.0682016	0.225253	-0.302778	0.762059	0.99478	54.9653	2.92771	0.286964	10.2024	1.93465e-24	3.04717e-23	54.9653	-1.20477	0.2894	-4.16298	3.14117e-05	0.000139149	54.9653	-0.43239	0.324687	-1.33172	0.182953	0.391265	2.85951	2.49532
WBGene00000982	dhs-19	T11F9.11	135.082	5.19367	0.188671	27.5277	8.17574e-167	1.40484e-166	135.082	-0.127433	0.266406	-0.478343	0.632406	0.99478	135.082	4.73548	0.291681	16.2351	2.84798e-59	2.44628e-57	135.082	-1.12663	0.309493	-3.64025	0.00027237	0.000960381	135.082	-2.11453	0.362457	-5.83388	5.41544e-09	8.97029e-07	4.60804	2.62095
WBGene00000983	dhs-20	F35B12.2	33.0216	3.97274	0.222936	17.8201	4.93079e-71	6.08483e-71	33.0216	-0.796011	0.325801	-2.44324	0.0145559	0.750288	33.0216	4.43675	0.457741	9.69272	3.23782e-22	4.28634e-21	33.0216	-1.88846	0.46933	-4.02374	5.72814e-05	0.000237985	33.0216	-0.594812	0.455202	-1.3067	0.191315	0.402468	3.64074	3.84194
WBGene00000984	dhs-21	R11D1.11	71.238	4.46843	0.149352	29.9187	1.12331e-196	2.13479e-196	71.238	0.0224244	0.208219	0.107696	0.914237	0.995157	71.238	2.47239	0.222162	11.1288	9.08796e-29	1.98032e-27	71.238	0.304094	0.234409	1.29728	0.194536	0.280288	71.238	-0.517671	0.284919	-1.8169	0.0692318	0.209593	2.49481	1.95472
WBGene00000985	dhs-22	C15H11.4	156.226	6.63995	0.110537	60.0701	0	0	156.226	0.233523	0.154669	1.50983	0.131088	0.965307	156.226	0.4118	0.156136	2.63745	0.00835319	0.0126315	156.226	0.668084	0.154983	4.31069	1.62748e-05	7.63316e-05	156.226	-0.542596	0.226448	-2.39611	0.0165699	0.0780479	0.645324	-0.130796
WBGene00000988	dhs-25	F09E10.3	194.828	8.17918	0.192493	42.4907	0	0	194.828	0.188934	0.271933	0.694782	0.487192	0.99478	194.828	3.11848	0.284079	10.9775	4.90297e-28	1.00328e-26	194.828	-3.29644	0.293901	-11.2161	3.39786e-29	1.54938e-27	194.828	-1.22906	0.377486	-3.25592	0.00113028	0.0112979	3.30741	1.88942
WBGene00000989	dhs-26	ZK816.5	309.35	4.11526	0.218219	18.8584	2.50835e-79	3.17553e-79	309.35	-0.589709	0.314624	-1.87433	0.0608848	0.900431	309.35	8.8875	0.592043	15.0116	6.16659e-51	3.96109e-49	309.35	-3.10104	0.608374	-5.09726	3.44597e-07	2.33321e-06	309.35	-0.624218	0.39616	-1.57567	0.115101	0.289961	8.29779	8.26328
WBGene00000991	dhs-28	M03A8.1	208.207	6.5012	0.137511	47.2777	0	0	208.207	-0.0243425	0.19386	-0.125568	0.900074	0.995157	208.207	2.30716	0.186602	12.3641	4.08939e-35	1.35463e-33	208.207	-0.0312705	0.197065	-0.158681	0.87392	0.908351	208.207	-0.654051	0.263584	-2.48138	0.0130875	0.0663834	2.28282	1.65311
WBGene00000993	dhs-30	T25G12.7	23.8682	4.81589	0.185755	25.9261	3.38505e-148	5.46088e-148	23.8682	-0.0590748	0.26153	-0.225882	0.821293	0.99478	23.8682	1.34172	0.338272	3.9664	7.29656e-05	0.000154352	23.8682	-1.00395	0.31533	-3.18379	0.0014536	0.00418625	23.8682	-1.15455	0.464679	-2.48463	0.0129686	0.0660005	1.28265	0.187167
WBGene00000995	die-1	C18D1.1	32.03	6.04326	0.169752	35.6006	1.37157e-277	3.4022e-277	32.03	0.143245	0.238754	0.599969	0.548527	0.99478	32.03	-0.413549	0.38329	-1.07895	0.280612	0.32313	32.03	-1.8406	0.286902	-6.41542	1.40434e-10	1.61335e-09	32.03	-0.966451	0.566663	-1.70551	0.0880985	0.244474	-0.270304	-1.38
WBGene00000996	dif-1	F49E8.5	57.9589	5.78513	0.179215	32.2804	1.31587e-228	2.75051e-228	57.9589	0.120775	0.252054	0.479163	0.631823	0.99478	57.9589	-0.0177452	0.263534	-0.0673355	0.946315	0.953543	57.9589	0.215289	0.25258	0.852359	0.394015	0.494158	57.9589	-0.456845	0.383165	-1.19229	0.233147	0.455302	0.10303	-0.47459
WBGene00000998	dig-1	K07E12.1	105.563	7.01043	0.133798	52.3957	0	0	105.563	-0.429034	0.189986	-2.25824	0.0239307	0.769638	105.563	1.32599	0.203575	6.51354	7.33998e-11	3.55078e-10	105.563	-1.0362	0.201192	-5.15029	2.60083e-07	1.79722e-06	105.563	-0.409769	0.284533	-1.44015	0.149826	0.345718	0.896959	0.916224
WBGene00001000	dim-1	C18A11.7	136.709	6.41451	0.144898	44.2691	0	0	136.709	0.0986282	0.203876	0.483767	0.628551	0.99478	136.709	1.25162	0.195371	6.40638	1.49015e-10	6.89707e-10	136.709	0.338128	0.202783	1.66744	0.0954279	0.155236	136.709	-1.26162	0.290187	-4.3476	1.37633e-05	0.00039082	1.35025	-0.00999607
WBGene00001001	dis-3	C04G2.6	69.5527	6.38116	0.119783	53.2726	0	0	69.5527	-0.0559488	0.168776	-0.331497	0.740269	0.99478	69.5527	-0.460577	0.210981	-2.18303	0.0290334	0.0399088	69.5527	-0.106023	0.177852	-0.596134	0.551086	0.641385	69.5527	0.0957546	0.292154	0.327754	0.743098	0.863369	-0.516526	-0.364823
WBGene00001002	div-1	R01H10.1	55.1446	5.92463	0.144733	40.9349	0	0	55.1446	0.0736505	0.203333	0.362217	0.71719	0.99478	55.1446	-2.50922	0.302447	-8.2964	1.07315e-16	9.22861e-16	55.1446	0.715275	0.201959	3.54169	0.000397576	0.00134063	55.1446	1.00934	0.398045	2.53574	0.011221	0.0594024	-2.43557	-1.49988
WBGene00001005	dlc-1	T26A5.9	202.926	7.69721	0.0972252	79.1689	0	0	202.926	0.222712	0.136617	1.63019	0.103061	0.954102	202.926	-0.287975	0.147643	-1.95049	0.0511177	0.0674417	202.926	0.033157	0.13758	0.241002	0.809554	0.859962	202.926	-0.0883162	0.209052	-0.42246	0.672689	0.820612	-0.0652634	-0.376292
WBGene00001006	dlg-1	C25F6.2	26.4066	5.41019	0.22009	24.5817	1.98375e-133	3.03898e-133	26.4066	-0.253623	0.311629	-0.813863	0.415724	0.99478	26.4066	1.69978	0.400427	4.24492	2.18671e-05	5.01341e-05	26.4066	-2.09057	0.379533	-5.50826	3.62391e-08	2.93208e-07	26.4066	-0.558009	0.509487	-1.09524	0.273413	0.499642	1.44616	1.14177
WBGene00001007	dli-1	C39E9.14	92.1081	5.80711	0.141493	41.0417	0	0	92.1081	0.145163	0.198231	0.73229	0.463991	0.99478	92.1081	-0.198663	0.200802	-0.989349	0.322492	0.36532	92.1081	1.07546	0.194783	5.52131	3.36475e-08	2.73738e-07	92.1081	-0.135976	0.292803	-0.464394	0.642365	0.80065	-0.0535005	-0.334639
WBGene00001008	dlk-1	F33E2.2	38.2019	4.99847	0.295585	16.9104	3.76831e-64	4.52038e-64	38.2019	-0.345179	0.418916	-0.823982	0.40995	0.99478	38.2019	0.730066	0.397386	1.83717	0.0661848	0.0856553	38.2019	0.164843	0.408506	0.403525	0.686562	0.761506	38.2019	-0.462638	0.592231	-0.781177	0.434698	0.647219	0.384887	0.267429
WBGene00001016	dna-2	F43G6.1	60.7399	6.04022	0.128993	46.826	0	0	60.7399	-0.192678	0.182458	-1.05601	0.290963	0.99478	60.7399	-2.13745	0.264376	-8.08487	6.22299e-16	5.10202e-15	60.7399	0.662089	0.181969	3.63847	0.000274266	0.000965684	60.7399	1.20981	0.34909	3.4656	0.000529049	0.00632404	-2.33012	-0.927641
WBGene00001017	dnc-1	ZK593.5	106.166	7.0962	0.0905967	78.3274	0	0	106.166	-0.106682	0.127811	-0.834685	0.403895	0.99478	106.166	0.357387	0.164812	2.16845	0.0301242	0.0413082	106.166	-0.699971	0.144148	-4.85593	1.19823e-06	7.16707e-06	106.166	-0.218965	0.223271	-0.980714	0.326734	0.552503	0.250705	0.138422
WBGene00001018	dnc-2	C28H8.12	59.1624	5.66401	0.17173	32.9822	1.46391e-238	3.17589e-238	59.1624	0.0685172	0.241526	0.283685	0.776652	0.99478	59.1624	-0.886486	0.259008	-3.42261	0.00062022	0.00112708	59.1624	0.819519	0.236771	3.46123	0.000537717	0.00175913	59.1624	0.00641379	0.376421	0.0170389	0.986406	0.992755	-0.817969	-0.880072
WBGene00001019	dnj-1	B0035.14	46.0246	5.05948	0.147717	34.2511	4.2047e-257	9.73976e-257	46.0246	0.233206	0.205184	1.13657	0.255716	0.993234	46.0246	-0.599111	0.237995	-2.51733	0.0118249	0.0173797	46.0246	1.00403	0.208172	4.82309	1.41355e-06	8.29377e-06	46.0246	-0.283418	0.342207	-0.828208	0.407552	0.625076	-0.365904	-0.882529
WBGene00001020	dnj-2	B0035.2	23.7075	4.56937	0.171874	26.5855	9.97964e-156	1.64921e-155	23.7075	0.180373	0.239071	0.754474	0.450565	0.99478	23.7075	-0.344905	0.31799	-1.08464	0.27808	0.320315	23.7075	0.229538	0.260937	0.87967	0.379038	0.478952	23.7075	-0.368564	0.44421	-0.829706	0.406705	0.624326	-0.164532	-0.713469
WBGene00001023	dnj-5	C04A2.7	206.29	7.66906	0.0973247	78.7987	0	0	206.29	0.219673	0.136747	1.60642	0.108182	0.954102	206.29	-1.9308	0.163215	-11.8298	2.73777e-32	7.66057e-31	206.29	0.698597	0.133637	5.22756	1.71762e-07	1.23065e-06	206.29	0.870828	0.223351	3.89891	9.66251e-05	0.0018022	-1.71113	-1.05997
WBGene00001025	dnj-7	C55B6.2	28.1485	5.23703	0.150268	34.8514	4.06051e-266	9.71026e-266	28.1485	-0.0238729	0.211148	-0.113062	0.909981	0.995157	28.1485	1.80818	0.333872	5.41579	6.1018e-08	2.05536e-07	28.1485	-1.83969	0.30539	-6.02406	1.701e-09	1.71189e-08	28.1485	-0.557016	0.382791	-1.45514	0.14563	0.339133	1.78431	1.25116
WBGene00001026	dnj-8	C56C10.13	52.7379	5.96917	0.126402	47.2238	0	0	52.7379	0.0367113	0.177453	0.206879	0.836104	0.99478	52.7379	-1.02551	0.242126	-4.23544	2.28102e-05	5.21186e-05	52.7379	0.143001	0.186708	0.765908	0.443731	0.541971	52.7379	0.220206	0.331923	0.663424	0.507059	0.704817	-0.9888	-0.805305
WBGene00001027	dnj-9	F11G11.7	33.7175	5.57663	0.127482	43.7446	0	0	33.7175	0.0135271	0.178743	0.0756792	0.939674	0.995931	33.7175	-0.636977	0.283509	-2.24676	0.0246552	0.0343184	33.7175	-0.425015	0.20709	-2.05232	0.0401383	0.075197	33.7175	-0.294681	0.39701	-0.74225	0.457936	0.664484	-0.62345	-0.931657
WBGene00001028	dnj-10	F22B7.5	37.0064	5.78329	0.159092	36.3518	2.45807e-289	6.30917e-289	37.0064	-0.0882833	0.224453	-0.393326	0.694079	0.99478	37.0064	-0.180446	0.303967	-0.593636	0.552756	0.591855	37.0064	-0.873101	0.250469	-3.48587	0.000490544	0.00162247	37.0064	0.042607	0.409919	0.10394	0.917217	0.961295	-0.268729	-0.137839
WBGene00001029	dnj-11	F38A5.13	163.369	8.04902	0.103078	78.0866	0	0	163.369	-0.0587735	0.145554	-0.40379	0.686367	0.99478	163.369	-0.893783	0.175495	-5.09292	3.5259e-07	1.0592e-06	163.369	-0.718063	0.14872	-4.82827	1.37721e-06	8.10635e-06	163.369	0.231835	0.245378	0.944809	0.344756	0.569302	-0.952556	-0.661948
WBGene00001030	dnj-12	F39B2.10	154.633	7.31984	0.129983	56.3139	0	0	154.633	0.163637	0.183079	0.893807	0.371425	0.99478	154.633	-0.653759	0.190466	-3.43241	0.000598233	0.00109088	154.633	0.169522	0.179858	0.942531	0.345921	0.445154	154.633	0.20897	0.272619	0.766527	0.443363	0.653395	-0.490122	-0.444789
WBGene00001031	dnj-13	F54D5.8	97.9077	6.98535	0.120383	58.0258	0	0	97.9077	0.115516	0.169359	0.68208	0.495189	0.99478	97.9077	-0.795068	0.208007	-3.82231	0.000132206	0.000267563	97.9077	-0.311002	0.174864	-1.77854	0.075315	0.127721	97.9077	0.358176	0.28334	1.26412	0.206186	0.422914	-0.679551	-0.436892
WBGene00001032	dnj-14	K02G10.8	24.3175	5.02103	0.257245	19.5185	7.64892e-85	9.86256e-85	24.3175	-0.180223	0.363772	-0.495428	0.620298	0.99478	24.3175	1.26313	0.434434	2.90752	0.00364305	0.00581612	24.3175	-1.58434	0.41232	-3.8425	0.000121787	0.00046421	24.3175	0.262002	0.553473	0.473377	0.635944	0.797315	1.0829	1.52513
WBGene00001033	dnj-15	K08D10.2	21.2591	4.55629	0.184562	24.687	1.47621e-134	2.26993e-134	21.2591	0.244819	0.256696	0.953731	0.34022	0.99478	21.2591	-1.14867	0.375038	-3.06282	0.00219262	0.0036422	21.2591	0.271119	0.275118	0.985467	0.324395	0.4236	21.2591	-0.204992	0.523652	-0.391465	0.695453	0.835914	-0.903855	-1.35367
WBGene00001034	dnj-16	R74.4	54.4355	5.87055	0.156193	37.5852	0	0	54.4355	-0.0899918	0.220385	-0.408339	0.683025	0.99478	54.4355	-0.423847	0.254819	-1.66332	0.0962477	0.120751	54.4355	0.0562167	0.225503	0.249295	0.803133	0.855355	54.4355	0.263203	0.355423	0.740535	0.458975	0.66495	-0.513838	-0.160643
WBGene00001035	dnj-17	T03F6.2	51.5757	6.47097	0.144087	44.9101	0	0	51.5757	0.0175592	0.203032	0.0864849	0.931081	0.995931	51.5757	-0.955734	0.29577	-3.23134	0.00123212	0.00213705	51.5757	-1.00987	0.221864	-4.55177	5.31973e-06	2.80491e-05	51.5757	0.469186	0.389427	1.20481	0.228276	0.449383	-0.938175	-0.486548
WBGene00001036	dnj-18	T04A8.9	21.5688	4.75995	0.187949	25.3257	1.66478e-141	2.62772e-141	21.5688	0.00962171	0.263998	0.0364461	0.970927	0.998148	21.5688	-1.62832	0.395216	-4.12008	3.78733e-05	8.39143e-05	21.5688	0.297194	0.274995	1.08073	0.279819	0.376096	21.5688	0.191523	0.549931	0.348266	0.72764	0.853658	-1.6187	-1.4368
WBGene00001037	dnj-19	T05C3.5	132.114	6.88865	0.136942	50.3033	0	0	132.114	0.34049	0.192308	1.77055	0.076636	0.926909	132.114	-1.13966	0.202458	-5.62911	1.81146e-08	6.52425e-08	132.114	0.695262	0.187197	3.71406	0.000203957	0.000741818	132.114	0.0404397	0.291894	0.138542	0.889812	0.946692	-0.799166	-1.09922
WBGene00001038	dnj-20	T15H9.7	133.947	6.55314	0.112559	58.2194	0	0	133.947	-0.237521	0.159427	-1.48984	0.136267	0.968704	133.947	1.1224	0.166916	6.72434	1.76384e-11	9.16925e-11	133.947	-0.0125005	0.165867	-0.0753649	0.939924	0.956419	133.947	-0.00662908	0.231134	-0.0286807	0.977119	0.989349	0.884877	1.11577
WBGene00001039	dnj-21	T19B4.4	14.7541	3.69058	0.281442	13.1131	2.76865e-39	3.05984e-39	14.7541	0.373613	0.391607	0.954049	0.340059	1	14.7541	-0.600928	0.448685	-1.33931	0.180469	0.215125	14.7541	0.697297	0.397659	1.7535	0.0795155	0.134013	14.7541	-0.825893	0.664812	-1.2423	0.214128	1	-0.227316	-1.42682
WBGene00001040	dnj-22	T23B12.7	53.3197	5.83142	0.158735	36.7367	1.8938e-295	4.96256e-295	53.3197	0.0548141	0.223261	0.245515	0.806057	0.99478	53.3197	-2.31604	0.319401	-7.2512	4.13091e-13	2.59482e-12	53.3197	0.541116	0.222291	2.43427	0.014922	0.0319874	53.3197	1.64457	0.407697	4.0338	5.48824e-05	0.00115702	-2.26122	-0.67147
WBGene00001041	dnj-23	T24H10.3	59.5484	6.08177	0.109658	55.4614	0	0	59.5484	0.0851221	0.153406	0.55488	0.578976	0.99478	59.5484	-1.73912	0.239032	-7.27569	3.4466e-13	2.18353e-12	59.5484	0.458282	0.160366	2.85772	0.00426694	0.010776	59.5484	0.466615	0.320687	1.45505	0.145656	0.339133	-1.654	-1.27251
WBGene00001043	dnj-25	W07A8.3	31.588	4.98224	0.223059	22.336	1.6517e-110	2.33469e-110	31.588	-0.104901	0.314898	-0.333127	0.739038	0.99478	31.588	-0.203291	0.342077	-0.594284	0.552322	0.591477	31.588	0.17223	0.317425	0.542585	0.587416	0.674004	31.588	0.188739	0.48438	0.38965	0.696795	0.83652	-0.308192	-0.0145518
WBGene00001045	dnj-27	Y47H9C.5	29.547	5.74088	0.162991	35.2221	9.17682e-272	2.23505e-271	29.547	-0.37565	0.231659	-1.62156	0.104897	0.954102	29.547	0.384632	0.336058	1.14454	0.252399	0.293618	29.547	-1.57603	0.280249	-5.62368	1.86936e-08	1.57817e-07	29.547	0.180649	0.435854	0.414471	0.678529	0.823871	0.00898265	0.565281
WBGene00001047	dnj-29	Y63D3A.6	80.2186	6.63263	0.130563	50.8003	0	0	80.2186	0.0980818	0.183652	0.534065	0.593297	0.99478	80.2186	-0.477049	0.217201	-2.19635	0.028067	0.0386739	80.2186	-0.226855	0.189784	-1.19533	0.231957	0.323112	80.2186	-0.0841179	0.304539	-0.276214	0.782384	0.884904	-0.378967	-0.561167
WBGene00001048	dnj-30	Y71F9B.16	27.156	5.21202	0.227977	22.862	1.10962e-115	1.59595e-115	27.156	-0.0220839	0.321499	-0.0686907	0.945236	0.996435	27.156	-1.29676	0.405344	-3.19917	0.00137823	0.00236767	27.156	-0.136615	0.326199	-0.418809	0.675356	0.752126	27.156	0.737492	0.549185	1.34289	0.179309	0.386448	-1.31885	-0.559271
WBGene00001049	dog-1	F33H2.1	35.2531	5.73382	0.14661	39.1093	0	0	35.2531	-0.152984	0.207127	-0.738601	0.460149	0.99478	35.2531	-1.29708	0.3102	-4.18144	2.8967e-05	6.52774e-05	35.2531	-0.231762	0.221229	-1.04761	0.294817	0.393178	35.2531	0.408777	0.42303	0.966309	0.33389	0.559458	-1.45007	-0.888306
WBGene00001051	cks-1	C09G4.3	75.3669	6.71931	0.111648	60.1829	0	0	75.3669	-0.129967	0.157661	-0.824342	0.409745	0.99478	75.3669	-2.29238	0.255294	-8.97938	2.72309e-19	2.95815e-18	75.3669	0.121979	0.161452	0.755513	0.449941	0.548106	75.3669	1.26136	0.328053	3.845	0.000120552	0.00213405	-2.42234	-1.03101
WBGene00001055	dpf-2	C27C12.7	52.7767	5.05603	0.159166	31.7658	1.9244e-221	3.94001e-221	52.7767	-0.455806	0.227836	-2.00059	0.0454371	0.84626	52.7767	1.02645	0.233635	4.39339	1.11596e-05	2.67476e-05	52.7767	0.431833	0.232651	1.85614	0.0634331	0.110802	52.7767	-0.197761	0.335989	-0.588593	0.556134	0.741334	0.570643	0.828689
WBGene00001056	dpf-3	K02F2.1	106.635	6.66229	0.119503	55.7498	0	0	106.635	0.0904767	0.167966	0.538661	0.59012	0.99478	106.635	-0.714237	0.1883	-3.79309	0.000148785	0.000297933	106.635	0.449773	0.168129	2.67516	0.00746936	0.0174885	106.635	0.152148	0.266466	0.570986	0.568009	0.749704	-0.623761	-0.562089
WBGene00001057	dpf-4	F01F1.5	78.9299	6.51566	0.131904	49.3969	0	0	78.9299	-0.109486	0.186235	-0.58789	0.556606	0.99478	78.9299	-0.526138	0.215345	-2.44323	0.0145565	0.0210882	78.9299	-0.0102048	0.189762	-0.0537765	0.957113	0.970187	78.9299	0.264282	0.301661	0.87609	0.380981	0.603756	-0.635623	-0.261855
WBGene00001058	dpf-5	R11E3.8	143.346	6.95649	0.112545	61.8105	0	0	143.346	0.0887817	0.158271	0.560949	0.574832	0.99478	143.346	-0.26844	0.166417	-1.61305	0.106733	0.132733	143.346	0.467477	0.157492	2.96826	0.00299489	0.00789834	143.346	-0.121551	0.239969	-0.506529	0.612485	0.781846	-0.179658	-0.389991
WBGene00001060	dpf-7	R11E3.7	28.7225	5.28379	0.224314	23.5554	1.10579e-122	1.63109e-122	28.7225	-0.323428	0.318054	-1.01689	0.309204	0.99478	28.7225	-1.01654	0.380769	-2.66971	0.00759171	0.0115438	28.7225	-0.133308	0.320511	-0.415925	0.677465	0.753907	28.7225	0.71636	0.52901	1.35415	0.175687	0.381888	-1.33997	-0.300182
WBGene00001061	dpl-1	T23G7.1	59.8603	6.60579	0.210281	31.4142	1.29648e-216	2.61812e-216	59.8603	-0.032345	0.297031	-0.108894	0.913286	0.995157	59.8603	-1.57213	0.348206	-4.51494	6.33341e-06	1.57578e-05	59.8603	-0.595273	0.293637	-2.02724	0.0426374	0.0791961	59.8603	0.90814	0.47918	1.8952	0.0580664	0.186246	-1.60447	-0.663988
WBGene00001068	dpy-6	F16F9.2	14.1171	4.59998	0.280514	16.3984	1.96386e-60	2.32821e-60	14.1171	-0.526996	0.399521	-1.31907	0.187145	1	14.1171	1.52385	0.545156	2.79526	0.00518576	0.00807317	14.1171	-2.24238	0.50297	-4.45828	8.26198e-06	4.17165e-05	14.1171	0.234799	0.659615	0.355964	0.721867	1	0.996858	1.75865
WBGene00001073	dpy-11	F46E10.9	87.688	5.94218	0.128955	46.0794	0	0	87.688	0.222949	0.180118	1.2378	0.215792	0.993234	87.688	0.124461	0.190609	0.652966	0.513778	0.555597	87.688	0.67729	0.18245	3.71219	0.000205476	0.000745874	87.688	-0.470239	0.274753	-1.7115	0.0869898	0.24295	0.34741	-0.345778
WBGene00001077	dpy-18	Y47D3B.10	26.4251	4.86984	0.174035	27.9819	2.69581e-172	4.71672e-172	26.4251	-0.316251	0.247432	-1.27814	0.201201	0.986533	26.4251	1.5776	0.328453	4.80313	1.56206e-06	4.27052e-06	26.4251	-1.14195	0.307485	-3.71384	0.000204137	0.000742107	26.4251	-0.258544	0.409148	-0.631908	0.527447	0.721196	1.26135	1.31906
WBGene00001080	dpy-21	Y59A8B.1	41.6472	6.29339	0.171645	36.6652	2.62445e-294	6.85287e-294	41.6472	-0.203065	0.242811	-0.836308	0.402982	0.99478	41.6472	0.258833	0.323175	0.800908	0.423185	0.468325	41.6472	-1.74714	0.277261	-6.30143	2.94915e-10	3.25155e-09	41.6472	0.0819369	0.427493	0.191668	0.848002	0.923151	0.0557684	0.34077
WBGene00001081	dpy-22	F47A4.2	156.039	7.99552	0.0936713	85.3572	0	0	156.039	-0.0900067	0.13228	-0.680426	0.496235	0.99478	156.039	1.13376	0.163889	6.91783	4.58613e-12	2.57039e-11	156.039	-1.77849	0.152642	-11.6514	2.25748e-31	1.18269e-29	156.039	-0.791988	0.222141	-3.56524	0.000363518	0.00474483	1.04375	0.34177
WBGene00001082	dpy-23	R160.1	16.3374	4.22938	0.256947	16.4602	7.09175e-61	8.41554e-61	16.3374	-0.221226	0.363742	-0.608194	0.543059	1	16.3374	1.03344	0.433197	2.38561	0.0170508	0.0244381	16.3374	-0.784884	0.407188	-1.92757	0.0539084	0.0970798	16.3374	-0.413605	0.587555	-0.703943	0.481468	0.683854	0.812213	0.619834
WBGene00001085	dpy-26	C25G4.5	64.325	6.77318	0.134578	50.3291	0	0	64.325	-0.0916935	0.190016	-0.482558	0.62941	0.99478	64.325	-1.47233	0.281802	-5.22468	1.74453e-07	5.46283e-07	64.325	-0.784993	0.201334	-3.89896	9.66083e-05	0.00037779	64.325	1.08423	0.362808	2.98844	0.00280405	0.0220676	-1.56402	-0.388095
WBGene00001086	dpy-27	R13G10.1	44.0109	6.60562	0.246998	26.7436	1.46512e-157	2.43538e-157	44.0109	-0.310632	0.349584	-0.888578	0.37423	0.99478	44.0109	0.95645	0.424845	2.25129	0.0243671	0.033975	44.0109	-2.9305	0.394249	-7.4331	1.06079e-13	1.70349e-12	44.0109	0.477977	0.54416	0.878376	0.37974	0.602637	0.645818	1.43443
WBGene00001087	dpy-28	Y39A1B.3	47.6133	6.46596	0.1282	50.4364	0	0	47.6133	-0.271496	0.18169	-1.49428	0.135102	0.968704	47.6133	-1.51195	0.311505	-4.85369	1.21184e-06	3.36662e-06	47.6133	-0.915986	0.201643	-4.5426	5.55646e-06	2.91724e-05	47.6133	1.18837	0.393481	3.02015	0.00252653	0.0202968	-1.78344	-0.323577
WBGene00001088	dpy-30	ZK863.6	83.5902	6.21005	0.22605	27.4721	3.78612e-166	6.48761e-166	83.5902	0.385709	0.318275	1.21187	0.225562	0.993234	83.5902	-0.479397	0.307457	-1.55923	0.118941	0.14673	83.5902	0.392377	0.307164	1.27742	0.201454	0.288456	83.5902	-0.176641	0.451807	-0.390965	0.695823	0.836093	-0.0936884	-0.656038
WBGene00001089	dre-1	K04A8.6	27.2846	5.14078	0.224065	22.9433	1.71884e-116	2.47941e-116	27.2846	-0.133898	0.316557	-0.422981	0.672309	0.99478	27.2846	1.27542	0.3627	3.51645	0.000437359	0.000816677	27.2846	-1.09654	0.349834	-3.13446	0.0017217	0.00486169	27.2846	-1.20958	0.518703	-2.33194	0.0197038	0.0876669	1.14152	0.0658306
WBGene00001090	drh-1	F15B10.2	25.5163	4.8654	0.230361	21.1207	5.12888e-99	6.96581e-99	25.5163	0.177197	0.323392	0.547932	0.583738	0.99478	25.5163	0.296455	0.375774	0.788919	0.430159	0.475189	25.5163	-0.494788	0.344882	-1.43466	0.151385	0.228221	25.5163	-0.259727	0.514562	-0.504754	0.613732	0.782575	0.473652	0.0367279
WBGene00001091	drh-2	C01B10.1	17.7988	3.91999	0.18015	21.7595	5.61128e-105	7.77538e-105	17.7988	-0.128485	0.25365	-0.506543	0.612476	1	17.7988	1.62036	0.350675	4.62068	3.8249e-06	9.84823e-06	17.7988	-0.597732	0.328177	-1.82137	0.06855	0.118255	17.7988	-0.678258	0.44035	-1.54027	0.123494	0.304554	1.49187	0.942097
WBGene00001093	drp-1	T12E12.4	84.5108	6.62825	0.130111	50.9431	0	0	84.5108	0.0525294	0.183154	0.286805	0.774262	0.99478	84.5108	-1.07216	0.217992	-4.91834	8.72821e-07	2.47791e-06	84.5108	0.18233	0.184318	0.989209	0.322561	0.421883	84.5108	0.206175	0.306633	0.672384	0.50134	0.700084	-1.01963	-0.865984
WBGene00001094	dars-1	B0464.1	148.703	6.54289	0.117146	55.8524	0	0	148.703	0.334689	0.163665	2.04497	0.0408582	0.822797	148.703	0.030918	0.163512	0.189087	0.850025	0.867643	148.703	0.939657	0.161559	5.8162	6.02001e-09	5.59369e-08	148.703	-0.594362	0.240353	-2.47288	0.0134031	0.0672765	0.365607	-0.563444
WBGene00001099	dsc-4	K02D7.4	92.6395	5.95974	0.13622	43.7509	0	0	92.6395	-0.10034	0.192153	-0.52219	0.601538	0.99478	92.6395	2.26412	0.212223	10.6686	1.42797e-26	2.65035e-25	92.6395	-0.690154	0.215616	-3.20084	0.00137028	0.00397888	92.6395	-0.723561	0.277655	-2.60597	0.00916139	0.0513999	2.16378	1.54056
WBGene00001101	dsh-1	C34F11.9	31.9811	5.4782	0.214494	25.5402	7.06004e-144	1.12228e-143	31.9811	0.0402185	0.302251	0.133063	0.894143	0.995157	31.9811	1.47823	0.357213	4.13823	3.49996e-05	7.79075e-05	31.9811	-1.52897	0.34403	-4.44429	8.81808e-06	4.42522e-05	31.9811	-1.47386	0.502839	-2.93107	0.003378	0.0251884	1.51845	0.0043753
WBGene00001102	dsh-2	C27A2.6	97.7281	7.3812	0.11739	62.8778	0	0	97.7281	-0.0213268	0.16562	-0.128769	0.89754	0.995157	97.7281	-1.59462	0.234814	-6.79102	1.11346e-11	5.91737e-11	97.7281	-0.68873	0.171865	-4.00739	6.13922e-05	0.000252367	97.7281	0.732483	0.312421	2.34454	0.0190507	0.0856728	-1.61595	-0.862141
WBGene00001112	duo-3	Y106G6H.12	46.8988	6.10049	0.103366	59.0184	0	0	46.8988	-0.106693	0.145623	-0.732664	0.463763	0.99478	46.8988	-1.41912	0.25512	-5.56254	2.65871e-08	9.33899e-08	46.8988	-0.127828	0.162826	-0.785055	0.432421	0.531762	46.8988	0.0885294	0.356687	0.248199	0.80398	0.896175	-1.52581	-1.33059
WBGene00001118	dyf-2	ZK520.3	22.7893	5.51543	0.618927	8.91128	5.04448e-19	5.24248e-19	22.7893	-0.603022	0.876154	-0.68826	0.491289	0.99478	22.7893	0.912428	0.826316	1.10421	0.269501	0.311307	22.7893	-2.08674	0.854373	-2.44242	0.0145892	0.0313925	22.7893	0.0636278	1.215	0.0523685	0.958235	0.980647	0.309406	0.976055
WBGene00001119	dyf-3	C04C3.5	19.7363	3.43726	0.619396	5.54937	2.86698e-08	2.90155e-08	19.7363	-0.292049	0.876792	-0.333088	0.739068	1	19.7363	0.217939	0.793481	0.274662	0.783576	0.807066	19.7363	0.833196	0.832291	1.00109	0.316785	0.415794	19.7363	0.837098	1.18365	0.707218	0.479431	0.683344	-0.0741101	1.05504
WBGene00001130	dyn-1	C02C6.1	36.2999	5.28127	0.152576	34.6141	1.55224e-262	3.66808e-262	36.2999	0.0119948	0.214209	0.0559957	0.955345	0.997103	36.2999	0.772666	0.273216	2.82804	0.0046834	0.00733438	36.2999	-0.585103	0.247176	-2.36715	0.0179255	0.0375647	36.2999	-0.451251	0.364493	-1.23803	0.215707	0.434962	0.784661	0.321415
WBGene00001131	dys-1	F15D3.1	62.528	6.66568	0.197135	33.8129	1.2767e-250	2.88852e-250	62.528	-0.42507	0.279444	-1.52113	0.128228	0.965307	62.528	1.00084	0.301979	3.31429	0.000918773	0.00162562	62.528	-1.63319	0.294073	-5.55371	2.79668e-08	2.30057e-07	62.528	0.0345888	0.416736	0.0829993	0.933852	0.968427	0.575775	1.03543
WBGene00001132	alp-1	T11B7.4	64.8269	4.71131	0.168516	27.9576	5.32691e-172	9.30037e-172	64.8269	-0.0711221	0.237047	-0.300034	0.764151	0.99478	64.8269	2.23358	0.237264	9.4139	4.78062e-21	5.85645e-20	64.8269	0.377419	0.250354	1.50754	0.131672	0.202944	64.8269	-1.27575	0.336027	-3.79656	0.000146719	0.00248351	2.16246	0.957834
WBGene00001134	eat-3	D2013.5	55.037	5.97906	0.169625	35.2488	3.58092e-272	8.733e-272	55.037	0.318574	0.237897	1.33913	0.180529	0.981054	55.037	-0.251229	0.271262	-0.926149	0.354369	0.397951	55.037	-0.235684	0.245338	-0.960651	0.336728	0.435928	55.037	-0.397769	0.382411	-1.04016	0.298265	0.523205	0.0673452	-0.648998
WBGene00001137	eat-6	B0365.3	619.41	8.42446	0.089465	94.1649	0	0	619.41	0.0975644	0.126106	0.773668	0.439127	0.99478	619.41	0.607184	0.115267	5.26761	1.38208e-07	4.38173e-07	619.41	0.877976	0.120988	7.25673	3.96574e-13	6.09042e-12	619.41	-0.643164	0.173173	-3.714	0.000204012	0.00307714	0.704748	-0.0359805
WBGene00001145	eat-16	C16C2.2	16.9752	4.37016	0.227734	19.1898	4.50579e-82	5.75355e-82	16.9752	0.0862759	0.319426	0.270097	0.787086	1	16.9752	1.44294	0.430714	3.35012	0.000807779	0.00144202	16.9752	-1.33785	0.399256	-3.35086	0.000805603	0.00250252	16.9752	-0.661071	0.540046	-1.2241	0.220914	0.441382	1.52922	0.78187
WBGene00001149	bcat-1	K02A4.1	136.041	6.1227	0.131902	46.4185	0	0	136.041	0.0227294	0.185481	0.122543	0.902469	0.995157	136.041	1.61959	0.182398	8.87941	6.72154e-19	6.99324e-18	136.041	0.306356	0.189347	1.61796	0.105671	0.168782	136.041	-0.815041	0.260889	-3.1241	0.00178351	0.0156665	1.64232	0.804548
WBGene00001150	ech-1.1	C29F3.1	25.202	4.65523	0.222716	20.9021	5.12888e-97	6.91117e-97	25.202	-0.192181	0.315021	-0.610058	0.541823	0.99478	25.202	5.32611	0.792812	6.718	1.84231e-11	9.55697e-11	25.202	-4.52578	0.789492	-5.73253	9.89459e-09	8.87031e-08	25.202	-0.261979	0.472262	-0.554733	0.579078	0.756553	5.13393	5.06413
WBGene00001151	ech-2	F38H4.8	30.2928	5.37382	0.226366	23.7395	1.4093e-124	2.09594e-124	30.2928	-0.0241884	0.319321	-0.0757496	0.939618	0.995931	30.2928	-0.388747	0.382026	-1.01759	0.308871	0.35167	30.2928	-0.659622	0.333019	-1.98073	0.0476214	0.0873985	30.2928	0.492024	0.516364	0.952863	0.34066	0.565647	-0.412936	0.103277
WBGene00001152	ech-3	F43H9.1	27.5642	5.15247	0.175783	29.3115	7.39624e-189	1.3707e-188	27.5642	-0.416995	0.250571	-1.66418	0.0960772	0.954102	27.5642	1.33536	0.326797	4.0862	4.38497e-05	9.61465e-05	27.5642	-1.248	0.302428	-4.12659	3.68186e-05	0.000160365	27.5642	-0.316214	0.424826	-0.744339	0.456671	0.663686	0.918361	1.01914
WBGene00001153	ech-4	R06F6.9	73.6337	6.22901	0.107185	58.1145	0	0	73.6337	-0.0258063	0.150633	-0.171319	0.863973	0.99478	73.6337	-0.344922	0.190066	-1.81475	0.0695622	0.0896157	73.6337	0.177658	0.160098	1.10968	0.267137	0.362547	73.6337	0.0273701	0.262931	0.104096	0.917093	0.961295	-0.370728	-0.317551
WBGene00001155	ech-6	T05G5.6	198.724	8.47445	0.0907548	93.3775	0	0	198.724	0.0315976	0.128036	0.246786	0.805074	0.99478	198.724	0.547974	0.158507	3.45709	0.00054605	0.00100215	198.724	-1.84435	0.143056	-12.8925	4.9633e-38	3.81915e-36	198.724	-0.428935	0.214398	-2.00065	0.0454302	0.157631	0.579571	0.119039
WBGene00001156	ech-7	Y105E8A.4	30.8648	5.58604	0.290035	19.2599	1.16583e-82	1.49176e-82	30.8648	0.232559	0.408873	0.568781	0.569505	0.99478	30.8648	0.935856	0.444358	2.10609	0.0351969	0.0478028	30.8648	-1.63622	0.431708	-3.79011	0.000150579	0.00056235	30.8648	-1.25656	0.636693	-1.97357	0.0484312	0.164428	1.16841	-0.3207
WBGene00001160	efk-1	F42A10.4	60.0651	6.06059	0.140803	43.0429	0	0	60.0651	-0.205952	0.199232	-1.03373	0.301262	0.99478	60.0651	-0.329989	0.234837	-1.40519	0.159966	0.192329	60.0651	-0.0381564	0.205975	-0.185247	0.853035	0.894292	60.0651	0.435749	0.323571	1.34669	0.178082	0.385234	-0.535942	0.10576
WBGene00001161	efl-1	Y102A5C.18	21.3705	5.08346	0.169635	29.967	2.6425e-197	5.03746e-197	21.3705	-0.0128074	0.238477	-0.0537049	0.95717	0.997385	21.3705	-1.61814	0.428401	-3.77716	0.000158629	0.000316701	21.3705	-0.42635	0.266481	-1.59993	0.109615	0.174071	21.3705	0.666663	0.554064	1.20322	0.22889	0.449396	-1.63094	-0.951475
WBGene00001166	eftu-2	ZK328.2	213.23	7.46488	0.0861445	86.6554	0	0	213.23	0.232391	0.120633	1.92644	0.0540495	0.882837	213.23	-1.01144	0.134197	-7.53701	4.80868e-14	3.30127e-13	213.23	0.85478	0.119182	7.17205	7.38827e-13	1.11155e-11	213.23	0.0503991	0.191697	0.26291	0.79262	0.890268	-0.779051	-0.961044
WBGene00001167	eef-2	F25H5.4	5368.73	10.6705	0.0834278	127.901	0	0	5368.73	0.255152	0.117846	2.16514	0.0303773	0.792078	5368.73	1.05517	0.102464	10.298	7.19181e-25	1.18585e-23	5368.73	1.5824	0.110581	14.3098	1.90136e-46	2.46409e-44	5368.73	-0.906312	0.15633	-5.79744	6.73347e-09	1.04099e-06	1.31033	0.148862
WBGene00001168	eef-1A.1	F31E3.5	9339.43	12.3296	0.0718673	171.561	0	0	9339.43	0.251822	0.101585	2.47893	0.0131778	0.750288	9339.43	0.637957	0.0885272	7.20634	5.74738e-13	3.55875e-12	9339.43	0.838994	0.0953105	8.80275	1.33506e-18	3.14079e-17	9339.43	-0.765657	0.134931	-5.67442	1.39156e-08	1.64086e-06	0.889779	-0.1277
WBGene00001169	eef-1A.2	R03G5.1	792.949	7.79638	0.0996179	78.2629	0	0	792.949	-0.0560668	0.140603	-0.398759	0.690071	0.99478	792.949	1.57534	0.124026	12.7016	5.79038e-37	2.04658e-35	792.949	1.3139	0.133827	9.8179	9.42833e-23	2.85439e-21	792.949	-0.610263	0.187405	-3.25639	0.00112839	0.0112979	1.51927	0.965073
WBGene00001172	egl-3	C51E3.7	64.1888	5.48694	0.219368	25.0125	4.47293e-138	6.97078e-138	64.1888	-0.335349	0.311036	-1.07817	0.280959	0.99478	64.1888	1.1562	0.302552	3.82149	0.000132648	0.000268385	64.1888	-0.0486502	0.310036	-0.156918	0.87531	0.909667	64.1888	0.203885	0.432352	0.471572	0.637232	0.797916	0.820849	1.36008
WBGene00001173	egl-4	F55A8.2	129.928	6.59398	0.115472	57.1048	0	0	129.928	0.0309587	0.1624	0.190632	0.848814	0.99478	129.928	0.1174	0.167236	0.701999	0.48268	0.526981	129.928	0.591437	0.162153	3.64739	0.000264914	0.000938571	129.928	-0.262569	0.242535	-1.0826	0.278985	0.504967	0.148359	-0.145169
WBGene00001177	egl-8	B0348.4	67.7639	6.15666	0.151408	40.6627	0	0	67.7639	-0.338948	0.214868	-1.57747	0.114688	0.955072	67.7639	1.01805	0.240403	4.23476	2.28797e-05	5.22287e-05	67.7639	-0.770469	0.23106	-3.33449	0.000854545	0.00262912	67.7639	0.27878	0.321721	0.866527	0.386201	0.608175	0.679102	1.29683
WBGene00001178	egl-9	F22E12.4	19.8809	4.67943	0.276501	16.9238	3.00614e-64	3.60727e-64	19.8809	-0.108614	0.390508	-0.278135	0.780909	1	19.8809	1.34277	0.463659	2.89603	0.00377915	0.006023	19.8809	-1.45731	0.44288	-3.29054	0.000999961	0.00302734	19.8809	-0.12286	0.599377	-0.204979	0.837588	0.915779	1.23416	1.21991
WBGene00001182	egl-13	T22B7.1	19.8859	3.74618	0.186855	20.0486	2.07726e-89	2.72844e-89	19.8859	-0.0618263	0.261787	-0.23617	0.813301	1	19.8859	1.16202	0.327012	3.55345	0.000380211	0.000716851	19.8859	0.0548664	0.306628	0.178935	0.857989	0.897602	19.8859	-0.325304	0.425661	-0.764233	0.444728	0.654256	1.1002	0.836719
WBGene00001184	egl-15	F58A3.2	25.1127	5.72782	0.211535	27.0774	1.81877e-161	3.07162e-161	25.1127	-0.739946	0.30215	-2.44893	0.0143279	0.750288	25.1127	1.13712	0.396117	2.87068	0.00409592	0.00649143	25.1127	-2.20287	0.360722	-6.10683	1.0163e-09	1.0456e-08	25.1127	-0.13551	0.529238	-0.256048	0.797914	0.89255	0.397178	1.00161
WBGene00001187	egl-19	C48A7.1	24.1943	5.38196	0.186403	28.8728	2.62287e-183	4.7722e-183	24.1943	-0.471747	0.265629	-1.77596	0.0757394	0.923859	24.1943	1.11862	0.386642	2.89316	0.00381393	0.00607187	24.1943	-1.99643	0.341246	-5.85041	4.90349e-09	4.63791e-08	24.1943	0.397522	0.465058	0.854778	0.392674	0.612656	0.646868	1.51614
WBGene00001189	egl-21	F01D4.4	105.173	5.67029	0.127157	44.5928	0	0	105.173	-0.223609	0.180104	-1.24156	0.214399	0.992277	105.173	1.22068	0.182743	6.67975	2.39354e-11	1.22445e-10	105.173	0.50378	0.185048	2.72243	0.00648034	0.0155121	105.173	0.141296	0.254075	0.556118	0.57813	0.756037	0.99707	1.36198
WBGene00001194	egl-27	C04A2.3	103.682	7.26195	0.0928879	78.1797	0	0	103.682	-0.0564429	0.13093	-0.431092	0.666401	0.99478	103.682	-0.760155	0.182352	-4.1686	3.0647e-05	6.87278e-05	103.682	-0.52334	0.141853	-3.68931	0.000224867	0.000811872	103.682	0.241994	0.247033	0.979605	0.327281	0.552779	-0.816598	-0.51816
WBGene00001196	egl-30	M01D7.7	91.2449	6.16944	0.130911	47.1269	0	0	91.2449	-0.0994813	0.184691	-0.538636	0.590138	0.99478	91.2449	0.543564	0.195259	2.78381	0.00537244	0.0083427	91.2449	0.188341	0.189296	0.994956	0.319758	0.418935	91.2449	-0.0274369	0.274524	-0.0999436	0.920389	0.9623	0.444083	0.516127
WBGene00001208	egl-44	F28B12.2	31.4846	4.46342	0.161773	27.5907	1.43823e-167	2.47651e-167	31.4846	-0.346949	0.231068	-1.50151	0.133225	0.965307	31.4846	1.69029	0.276403	6.11533	9.63574e-10	4.05984e-09	31.4846	-0.257806	0.269227	-0.957577	0.338276	0.437243	31.4846	-0.470083	0.362708	-1.29604	0.194962	0.407925	1.34334	1.22021
WBGene00001209	egl-45	C27D11.1	198.856	7.84152	0.0944465	83.0261	0	0	198.856	0.152009	0.132874	1.14401	0.252621	0.993234	198.856	0.0714811	0.145991	0.489626	0.624398	0.659215	198.856	-0.368573	0.136553	-2.69912	0.00695237	0.0164501	198.856	-0.304474	0.206097	-1.47733	0.139587	0.329637	0.22349	-0.232993
WBGene00001214	ego-1	F26A3.3	52.9035	6.68635	0.135248	49.4376	0	0	52.9035	-0.192209	0.191296	-1.00478	0.315004	0.99478	52.9035	-0.733401	0.291921	-2.51233	0.0119937	0.0175999	52.9035	-1.418	0.216925	-6.53683	6.28372e-11	7.58461e-10	52.9035	0.596202	0.379709	1.57015	0.116379	0.291661	-0.925611	-0.1372
WBGene00001215	ego-2	Y53H1C.2	36.3702	5.7051	0.174474	32.6989	1.62044e-234	3.4606e-234	36.3702	-0.0243013	0.245907	-0.098823	0.921279	0.995275	36.3702	0.318413	0.322135	0.988445	0.322935	0.365765	36.3702	-1.18955	0.279563	-4.25504	2.09008e-05	9.64361e-05	36.3702	0.283865	0.414327	0.685124	0.493266	0.693823	0.294112	0.602278
WBGene00001224	ehs-1	ZK1248.3	75.6029	6.28198	0.109533	57.3525	0	0	75.6029	0.12955	0.153234	0.845437	0.397867	0.99478	75.6029	-1.123	0.20302	-5.53145	3.1759e-08	1.10714e-07	75.6029	0.449739	0.158558	2.83643	0.00456211	0.0114454	75.6029	0.255484	0.278131	0.918572	0.358319	0.581757	-0.993447	-0.867513
WBGene00001225	eif-3.B	Y54E2A.11	134.885	6.80219	0.102331	66.4723	0	0	134.885	0.235382	0.143115	1.6447	0.100031	0.954102	134.885	-0.680215	0.159746	-4.2581	2.06168e-05	4.75184e-05	134.885	0.726679	0.143294	5.07125	3.95208e-07	2.63888e-06	134.885	-0.121302	0.228247	-0.531452	0.595106	0.768545	-0.444832	-0.801517
WBGene00001226	eif-3.C	T23D8.4	142.252	7.49113	0.10675	70.1747	0	0	142.252	-0.00296029	0.150523	-0.0196667	0.984309	0.998148	142.252	-0.284361	0.170251	-1.67025	0.0948702	0.119164	142.252	-0.348918	0.154118	-2.26397	0.0235759	0.0476484	142.252	-0.0730938	0.24074	-0.303621	0.761416	0.872927	-0.287321	-0.357455
WBGene00001227	eif-3.D	R08D7.3	178.689	6.94954	0.119203	58.3001	0	0	178.689	0.107924	0.167679	0.643634	0.519813	0.99478	178.689	-0.793722	0.165726	-4.78937	1.67308e-06	4.54711e-06	178.689	1.21968	0.161177	7.56734	3.80957e-14	6.46927e-13	178.689	-0.155971	0.246627	-0.632418	0.527114	0.721024	-0.685799	-0.949694
WBGene00001228	eif-3.E	B0511.10	40.7163	5.38125	0.180272	29.8508	8.57189e-196	1.6261e-195	40.7163	-0.167103	0.254818	-0.655773	0.51197	0.99478	40.7163	0.147502	0.289281	0.509892	0.610127	0.646074	40.7163	-0.152525	0.265595	-0.574278	0.56578	0.65467	40.7163	0.172467	0.400316	0.430827	0.666594	0.81646	-0.0196009	0.319969
WBGene00001229	eif-3.F	D2013.7	89.6651	6.37246	0.160263	39.7626	0	0	89.6651	-0.0449488	0.226144	-0.198761	0.842449	0.99478	89.6651	-0.0536416	0.23118	-0.232034	0.816511	0.837369	89.6651	0.181844	0.224054	0.811606	0.417018	0.516518	89.6651	0.137109	0.331876	0.413133	0.679509	0.82401	-0.0985903	0.0834676
WBGene00001230	eif-3.G	F22B5.2	71.1406	5.98937	0.14606	41.0062	0	0	71.1406	0.126782	0.205046	0.618309	0.536371	0.99478	71.1406	-0.251039	0.223171	-1.12487	0.260642	0.302302	71.1406	0.397995	0.206893	1.92368	0.054395	0.0977416	71.1406	-0.153995	0.318582	-0.483376	0.628829	0.79296	-0.124257	-0.405034
WBGene00001231	eif-3.H	C41D11.2	27.3839	4.65868	0.209884	22.1965	3.7126e-109	5.2248e-109	27.3839	0.322476	0.292766	1.10148	0.270687	0.993234	27.3839	0.673971	0.356325	1.89145	0.058564	0.076555	27.3839	-0.520059	0.327451	-1.5882	0.11224	0.177541	27.3839	0.00141653	0.459227	0.0030846	0.997539	0.998256	0.996447	0.675388
WBGene00001232	eif-3.I	Y74C10AR.1	45.5536	4.8333	0.129637	37.2832	3.07264e-304	8.23869e-304	45.5536	0.430065	0.176433	2.43755	0.014787	0.750288	45.5536	-0.955256	0.244786	-3.90241	9.52409e-05	0.000196411	45.5536	1.01634	0.187245	5.42784	5.70392e-08	4.47291e-07	45.5536	0.785128	0.31209	2.51571	0.0118792	0.0617732	-0.525191	-0.170128
WBGene00001233	eif-3.K	T16G1.11	73.2135	6.00619	0.138288	43.4325	0	0	73.2135	0.0952926	0.194131	0.490868	0.62352	0.99478	73.2135	0.558235	0.215401	2.59161	0.00955279	0.0143166	73.2135	-0.0938864	0.204575	-0.458933	0.646282	0.726539	73.2135	-0.200547	0.296658	-0.676021	0.499027	0.697771	0.653528	0.357688
WBGene00001234	eif-6	C47B2.5	102.455	5.83977	0.100278	58.2361	0	0	102.455	0.117045	0.139405	0.839608	0.401128	0.99478	102.455	-0.522452	0.152517	-3.42554	0.000613589	0.0011164	102.455	1.46192	0.138036	10.5908	3.28767e-26	1.2204e-24	102.455	-0.243106	0.224661	-1.0821	0.279209	0.505058	-0.405406	-0.765558
WBGene00001235	elb-1	Y41C4A.10	22.4697	4.40794	0.225816	19.5201	7.40961e-85	9.55566e-85	22.4697	0.265917	0.315293	0.843396	0.399007	0.99478	22.4697	-0.272788	0.388795	-0.701624	0.482914	0.527133	22.4697	0.000418579	0.335346	0.0012482	0.999004	0.999545	22.4697	0.244863	0.51798	0.472727	0.636408	0.797315	-0.00687045	-0.0279245
WBGene00001239	elo-1	F56H11.4	242.425	7.72822	0.110622	69.8612	0	0	242.425	0.166381	0.15578	1.06805	0.285498	0.99478	242.425	0.218855	0.153554	1.42526	0.154081	0.18601	242.425	0.151447	0.153436	0.987037	0.323624	0.422893	242.425	-0.323632	0.223573	-1.44755	0.147744	0.342364	0.385236	-0.104777
WBGene00001240	elo-2	F11E6.5	84.351	6.97154	0.135755	51.354	0	0	84.351	0.18519	0.191029	0.969438	0.332327	0.99478	84.351	1.91821	0.245052	7.82778	4.96559e-15	3.74677e-14	84.351	-2.27618	0.235074	-9.68281	3.56764e-22	1.0335e-20	84.351	-1.06195	0.308014	-3.44773	0.000565312	0.00668856	2.1034	0.856261
WBGene00001241	elo-3	D2024.3	21.7682	4.10197	0.178865	22.9333	2.16482e-116	3.11969e-116	21.7682	-0.207686	0.253232	-0.820141	0.412135	0.99478	21.7682	0.119855	0.306728	0.390756	0.695978	0.725644	21.7682	0.524583	0.269551	1.94614	0.0516381	0.0934012	21.7682	-0.0090932	0.42927	-0.0211829	0.9831	0.992051	-0.0878305	0.110762
WBGene00001243	elo-5	F41H10.7	343.284	8.13123	0.146079	55.6633	0	0	343.284	0.172825	0.206201	0.838135	0.401955	0.99478	343.284	2.87182	0.200241	14.3419	1.19784e-46	6.41189e-45	343.284	-1.67228	0.210564	-7.94193	1.99057e-15	3.81932e-14	343.284	-0.98376	0.280108	-3.51208	0.000444621	0.00551551	3.04465	1.88806
WBGene00001244	elo-6	F41H10.8	140.302	7.82899	0.145474	53.8172	0	0	140.302	-0.12133	0.205639	-0.590015	0.555181	0.99478	140.302	2.76861	0.242985	11.3941	4.4718e-30	1.076e-28	140.302	-3.04758	0.243748	-12.503	7.18833e-36	4.87158e-34	140.302	-0.986309	0.303754	-3.24707	0.00116599	0.0115883	2.64728	1.7823
WBGene00001248	elp-1	F38A6.2	14.6574	4.73726	0.262417	18.0524	7.55327e-73	9.36489e-73	14.6574	-0.731179	0.375803	-1.94565	0.0516971	1	14.6574	1.35046	0.476927	2.83159	0.00463173	0.00726519	14.6574	-1.80429	0.444076	-4.06303	4.84405e-05	0.000204943	14.6574	-0.635704	0.666432	-0.953893	0.340138	1	0.619281	0.714756
WBGene00001250	elt-2	C33D3.1	31.6563	5.18196	0.192287	26.9491	5.84665e-160	9.82019e-160	31.6563	-0.634223	0.275653	-2.3008	0.0214027	0.769638	31.6563	1.1799	0.317381	3.71763	0.000201098	0.000396136	31.6563	-0.830712	0.302873	-2.74277	0.00609228	0.0147408	31.6563	-0.0629877	0.433192	-0.145404	0.884392	0.94455	0.545682	1.11692
WBGene00001251	elt-3	K02B9.4	32.8842	4.44713	0.224219	19.8338	1.51991e-87	1.98121e-87	32.8842	0.0806174	0.314603	0.256251	0.797757	0.99478	32.8842	0.715833	0.327941	2.18281	0.0290497	0.0399238	32.8842	0.354038	0.323081	1.09582	0.273159	0.368957	32.8842	-0.29012	0.462378	-0.627452	0.530363	0.722507	0.79645	0.425713
WBGene00001258	emb-4	Y80D3A.2	66.0469	6.39917	0.157949	40.5142	0	0	66.0469	0.036374	0.222605	0.163402	0.870202	0.99478	66.0469	0.199088	0.246333	0.808207	0.418971	0.464009	66.0469	-0.539885	0.23053	-2.34193	0.0191843	0.0398971	66.0469	-0.486323	0.351673	-1.38289	0.1667	0.3702	0.235462	-0.287235
WBGene00001259	emb-5	T04A8.14	141.898	7.46133	0.115169	64.7857	0	0	141.898	0.166151	0.162107	1.02494	0.30539	0.99478	141.898	-1.00712	0.184409	-5.46136	4.725e-08	1.61966e-07	141.898	-0.0244196	0.161833	-0.150894	0.880059	0.913062	141.898	0.0602541	0.261585	0.230342	0.817826	0.903974	-0.840974	-0.94687
WBGene00001262	emb-8	K10D2.6	122.266	6.94703	0.119807	57.9852	0	0	122.266	-0.0656197	0.169045	-0.388178	0.697884	0.99478	122.266	-1.27397	0.190883	-6.67408	2.48794e-11	1.26923e-10	122.266	0.562631	0.165974	3.38988	0.000699243	0.00221402	122.266	0.642272	0.268573	2.39143	0.016783	0.0785728	-1.33959	-0.631697
WBGene00001263	emb-9	K04H4.1	434.402	7.03938	0.151758	46.3855	0	0	434.402	0.0100158	0.214164	0.0467672	0.962699	0.997702	434.402	2.47209	0.191772	12.8908	5.07322e-38	1.8738e-36	434.402	0.535138	0.206631	2.58982	0.00960256	0.0217523	434.402	-1.0596	0.285529	-3.711	0.000206443	0.00309531	2.4821	1.41249
WBGene00001281	emb-27	F10B5.6	56.9444	6.36239	0.106304	59.8507	0	0	56.9444	0.0445839	0.149114	0.298991	0.764947	0.99478	56.9444	-1.7052	0.270127	-6.31256	2.74453e-10	1.23546e-09	56.9444	-0.310177	0.165811	-1.87067	0.0613905	0.107923	56.9444	1.06919	0.335624	3.18567	0.0014442	0.0135408	-1.66061	-0.63601
WBGene00001284	emb-30	F54C8.3	48.6636	6.08376	0.175152	34.7342	2.40088e-264	5.70083e-264	48.6636	-0.0111037	0.247014	-0.0449518	0.964146	0.997702	48.6636	-0.359195	0.297999	-1.20536	0.228066	0.267247	48.6636	-0.697631	0.258926	-2.69433	0.00705314	0.0166405	48.6636	0.402458	0.403071	0.998478	0.318047	0.543867	-0.370298	0.0432634
WBGene00001303	emo-1	F32D8.6	96.6973	6.72225	0.107812	62.3516	0	0	96.6973	0.250778	0.150811	1.66286	0.0963409	0.954102	96.6973	-0.139113	0.180591	-0.770318	0.441111	0.486052	96.6973	-0.0960532	0.159544	-0.602048	0.547142	0.638304	96.6973	-0.555299	0.255537	-2.17307	0.0297751	0.116965	0.111665	-0.694412
WBGene00001309	emr-1	M01D7.6	54.5584	5.5656	0.144429	38.5353	0	0	54.5584	-0.142568	0.203934	-0.699089	0.484496	0.99478	54.5584	-2.0423	0.268141	-7.61651	2.60618e-14	1.84228e-13	54.5584	1.13295	0.199137	5.6893	1.27559e-08	1.11512e-07	54.5584	1.11239	0.362542	3.0683	0.00215277	0.018001	-2.18487	-0.929912
WBGene00001320	ent-1	ZK809.4	116.354	6.78471	0.0964849	70.3189	0	0	116.354	0.0845247	0.135288	0.624774	0.53212	0.99478	116.354	-1.73981	0.177251	-9.81556	9.65017e-23	1.33494e-21	116.354	0.874317	0.134788	6.48662	8.77835e-11	1.0459e-09	116.354	0.535401	0.243608	2.1978	0.0279635	0.111806	-1.65529	-1.20441
WBGene00001324	eor-1	R11E3.6	42.1508	5.93189	0.126735	46.8053	0	0	42.1508	0.0301281	0.17793	0.169325	0.865541	0.99478	42.1508	-0.584638	0.274837	-2.12722	0.033402	0.0454989	42.1508	-0.669654	0.20503	-3.26612	0.00109031	0.00326076	42.1508	0.301313	0.357393	0.843085	0.399181	0.619109	-0.55451	-0.283326
WBGene00001325	eor-2	C44H4.7	32.2654	6.10608	0.179745	33.9709	5.99746e-253	1.36865e-252	32.2654	-0.307148	0.254711	-1.20587	0.227868	0.993234	32.2654	0.21446	0.364085	0.589038	0.555836	0.594894	32.2654	-2.00637	0.301897	-6.64587	3.01427e-11	3.79973e-10	32.2654	-0.0256216	0.48588	-0.0527324	0.957945	0.980554	-0.0926879	0.188838
WBGene00001328	epi-1	K08C7.3	176.504	7.72532	0.204153	37.8408	0	0	176.504	-0.316903	0.288878	-1.09701	0.272636	0.993234	176.504	2.05739	0.273001	7.5362	4.83853e-14	3.31868e-13	176.504	-1.62201	0.28633	-5.66483	1.47169e-08	1.27151e-07	176.504	-0.577925	0.395304	-1.46198	0.143748	0.336648	1.74049	1.47947
WBGene00001329	epn-1	T04C10.2	81.0672	6.33725	0.112803	56.1799	0	0	81.0672	0.0401112	0.158377	0.253264	0.800065	0.99478	81.0672	0.746608	0.19362	3.85604	0.000115238	0.000235286	81.0672	-0.519663	0.177861	-2.92175	0.00348076	0.00902822	81.0672	-0.0781366	0.25373	-0.307952	0.758119	0.87091	0.786719	0.668471
WBGene00001330	eps-8	Y57G11C.24	36.8542	4.59833	0.169932	27.0597	2.9346e-161	4.95268e-161	36.8542	-0.284786	0.241512	-1.17918	0.238326	0.993234	36.8542	0.906449	0.267044	3.39438	0.000687831	0.00124087	36.8542	0.273099	0.256825	1.06337	0.287615	0.385522	36.8542	0.0661308	0.365323	0.18102	0.856352	0.927981	0.621663	0.97258
WBGene00001331	erd-2	F09B9.3	100.318	6.35082	0.108714	58.4179	0	0	100.318	-0.0826073	0.153178	-0.53929	0.589687	0.99478	100.318	2.04201	0.188381	10.8398	2.23038e-27	4.40531e-26	100.318	-1.00122	0.18473	-5.41989	5.96361e-08	4.6712e-07	100.318	-0.381419	0.231424	-1.64814	0.0993243	0.264144	1.9594	1.66059
WBGene00001332	eri-1	T07A9.5	33.9924	5.84269	0.184928	31.5944	4.40749e-219	8.95437e-219	33.9924	-0.0101121	0.260753	-0.0387806	0.969065	0.998148	33.9924	-1.40503	0.410614	-3.42177	0.000622143	0.00113029	33.9924	-1.06838	0.284145	-3.76	0.000169913	0.000628517	33.9924	1.53402	0.50352	3.0466	0.00231446	0.0189833	-1.41514	0.128994
WBGene00001333	erm-1	C01G8.5	125.888	6.73816	0.120892	55.7368	0	0	125.888	0.0352461	0.170176	0.207116	0.835919	0.99478	125.888	0.116867	0.175804	0.66476	0.506204	0.548611	125.888	0.359302	0.17024	2.11056	0.0348098	0.0665476	125.888	-0.374855	0.255669	-1.46617	0.142602	0.334485	0.152113	-0.257987
WBGene00001334	ero-1	Y105E8B.8	56.5443	5.80098	0.139889	41.4686	0	0	56.5443	0.0726629	0.196312	0.370139	0.711279	0.99478	56.5443	0.0622993	0.237404	0.262419	0.792998	0.815633	56.5443	-0.150363	0.210507	-0.714291	0.475047	0.570319	56.5443	0.205712	0.317866	0.647166	0.517525	0.713378	0.134962	0.268011
WBGene00001335	F35A5.8	F35A5.8	13.7323	3.555	0.236801	15.0126	6.07063e-51	6.9644e-51	13.7323	0.0192048	0.331409	0.0579489	0.953789	1	13.7323	0.86412	0.418918	2.06274	0.0391369	0.0527274	13.7323	-0.210977	0.383048	-0.550784	0.581781	0.668786	13.7323	-0.239649	0.546956	-0.438151	0.661277	1	0.883325	0.624471
WBGene00001336	qars-1	Y41E3.4	122.837	6.63081	0.115562	57.3791	0	0	122.837	0.164335	0.162071	1.01397	0.310596	0.99478	122.837	-0.445881	0.174047	-2.56184	0.0104119	0.0154972	122.837	0.64996	0.161523	4.02394	5.72328e-05	0.000237917	122.837	-0.0461671	0.249155	-0.185295	0.852998	0.926801	-0.281546	-0.492048
WBGene00001337	ears-1	ZC434.5	160.668	7.23194	0.117192	61.7101	0	0	160.668	0.00696261	0.165226	0.04214	0.966387	0.998148	160.668	0.354702	0.168868	2.10047	0.0356877	0.0484248	160.668	-0.0155633	0.165771	-0.0938847	0.925201	0.94647	160.668	-0.274547	0.24304	-1.12964	0.25863	0.482383	0.361665	0.0801553
WBGene00001338	ears-2	T07A9.2	20.1752	4.46135	0.333605	13.3732	8.67686e-41	9.63559e-41	20.1752	0.0941441	0.470065	0.200279	0.841263	0.99478	20.1752	-0.316982	0.495866	-0.63925	0.52266	0.563963	20.1752	-0.0592738	0.468362	-0.126556	0.899292	0.92631	20.1752	0.0964393	0.705856	0.136627	0.891325	0.947555	-0.222838	-0.220543
WBGene00001340	etr-1	T01D1.2	64.7594	5.84393	0.111125	52.5887	0	0	64.7594	0.185106	0.154572	1.19754	0.231094	0.993234	64.7594	-0.0679865	0.193952	-0.350532	0.72594	0.752845	64.7594	0.290961	0.167375	1.73838	0.0821433	0.137688	64.7594	-0.284276	0.267465	-1.06285	0.287848	0.514268	0.11712	-0.352262
WBGene00001345	fos-1	F29G9.4	24.6333	3.72742	0.238503	15.6284	4.66227e-55	5.42451e-55	24.6333	0.00124324	0.334489	0.00371685	0.997034	0.998476	24.6333	1.23097	0.343197	3.58677	0.000334794	0.000637897	24.6333	0.564869	0.347685	1.62466	0.104236	0.166947	24.6333	-0.849853	0.494	-1.72035	0.085369	0.239482	1.23221	0.381116
WBGene00001352	evl-14	H38K22.1	56.8139	6.77845	0.101959	66.4821	0	0	56.8139	-0.240379	0.144435	-1.66427	0.0960579	0.954102	56.8139	-1.32376	0.275762	-4.80039	1.58356e-06	4.32609e-06	56.8139	-1.12538	0.17108	-6.57808	4.76571e-11	5.83819e-10	56.8139	0.888081	0.349399	2.54174	0.0110303	0.058668	-1.56414	-0.435682
WBGene00001366	exc-5	C33D9.1	13.1224	3.8455	0.244132	15.7517	6.68547e-56	7.80677e-56	13.1224	-0.618434	0.352275	-1.75554	0.0791667	1	13.1224	2.84252	0.554507	5.12621	2.95626e-07	8.9905e-07	13.1224	-2.1989	0.535667	-4.10497	4.04365e-05	0.000174375	13.1224	0.0153353	0.565097	0.0271375	0.97835	1	2.22409	2.85786
WBGene00001371	exl-1	F26H11.5	42.9399	5.17229	0.184948	27.9662	4.18483e-172	7.31676e-172	42.9399	-0.0983823	0.260918	-0.377062	0.706128	0.99478	42.9399	0.45387	0.277983	1.63273	0.102527	0.127911	42.9399	0.185143	0.267496	0.692132	0.488854	0.583859	42.9399	-0.303283	0.397318	-0.763326	0.445269	0.654497	0.355488	0.150587
WBGene00001372	exo-3	R09B3.1	64.7613	6.14515	0.223691	27.4716	3.83205e-166	6.56326e-166	64.7613	-0.15811	0.316265	-0.499927	0.617126	0.99478	64.7613	-1.92136	0.33509	-5.73385	9.81756e-09	3.65352e-08	64.7613	0.648945	0.302555	2.14488	0.0319624	0.0619052	64.7613	0.994466	0.479125	2.07559	0.037932	0.140072	-2.07946	-0.926889
WBGene00001385	far-1	F02A9.2	1218.79	7.49299	0.129339	57.933	0	0	1218.79	0.249322	0.182109	1.36908	0.170974	0.977785	1218.79	2.1075	0.157411	13.3885	7.05759e-41	2.9289e-39	1218.79	1.90493	0.171595	11.1013	1.23612e-28	5.50075e-27	1218.79	-1.10421	0.240214	-4.5968	4.29035e-06	0.000160473	2.35682	1.00328
WBGene00001386	far-2	F02A9.3	7654.76	10.4632	0.0975349	107.277	0	0	7654.76	0.143815	0.137829	1.04343	0.296748	0.99478	7654.76	2.0527	0.119499	17.1776	3.90592e-66	4.43892e-64	7654.76	1.56401	0.129249	12.1008	1.04636e-33	6.08617e-32	7654.76	-0.834753	0.182286	-4.57937	4.66383e-06	0.000172728	2.19652	1.21795
WBGene00001387	far-3	F15B9.1	534.766	7.55422	0.177975	42.4454	0	0	534.766	0.0980236	0.251312	0.390047	0.696502	0.99478	534.766	3.294	0.234134	14.0689	5.89893e-45	2.92452e-43	534.766	-1.10854	0.249628	-4.44079	8.96279e-06	4.47958e-05	534.766	0.361653	0.333687	1.08381	0.278449	0.504815	3.39203	3.65566
WBGene00001389	far-5	F15B9.3	27.983	3.01698	0.212205	14.2173	7.15853e-46	8.06591e-46	27.983	-0.0721894	0.296714	-0.243296	0.807776	0.99478	27.983	2.01399	0.299158	6.73219	1.67128e-11	8.71261e-11	27.983	0.860322	0.319522	2.69253	0.00709128	0.0167199	27.983	-0.442172	0.405419	-1.09065	0.275425	0.501868	1.9418	1.57182
WBGene00001390	far-6	W02A2.2	145.066	5.01262	0.16037	31.2565	1.82228e-214	3.64702e-214	145.066	0.164096	0.22378	0.733292	0.463381	0.99478	145.066	1.82648	0.200423	9.1131	8.00575e-20	9.12631e-19	145.066	1.4259	0.21888	6.51454	7.29133e-11	8.7295e-10	145.066	-0.736386	0.297619	-2.47426	0.0133512	0.0672101	1.99058	1.09009
WBGene00001392	far-8	K02F3.3	120.723	5.60869	0.20928	26.8	3.23527e-158	5.3948e-158	120.723	-0.257207	0.296328	-0.867982	0.385404	0.99478	120.723	1.99537	0.27293	7.31089	2.65374e-13	1.70314e-12	120.723	0.345805	0.290359	1.19096	0.23367	0.32506	120.723	-0.319706	0.398736	-0.801798	0.42267	0.638223	1.73816	1.67566
WBGene00001393	fat-1	Y67H2A.8	1023.03	7.70047	0.0800735	96.1675	0	0	1023.03	0.101244	0.11246	0.900268	0.367978	0.99478	1023.03	2.50356	0.10094	24.8026	8.41436e-136	6.90632e-133	1023.03	1.00922	0.109916	9.18172	4.24247e-20	1.09577e-18	1023.03	-0.779671	0.148589	-5.24717	1.54456e-07	1.23511e-05	2.6048	1.72389
WBGene00001394	fat-2	W02A2.1	1809.08	8.04073	0.108162	74.3394	0	0	1809.08	0.144008	0.15245	0.944624	0.344851	0.99478	1809.08	3.33274	0.134627	24.7553	2.71862e-135	2.00824e-132	1809.08	0.779551	0.146278	5.32923	9.86319e-08	7.39689e-07	1809.08	-0.889247	0.200804	-4.42843	9.49205e-06	0.000293494	3.47675	2.4435
WBGene00001395	fat-3	W08D2.4	578.348	5.7848	0.138358	41.8104	0	0	578.348	0.047338	0.194253	0.243693	0.807469	0.99478	578.348	3.31413	0.168495	19.669	3.97492e-86	9.17585e-84	578.348	1.42934	0.187696	7.61519	2.63299e-14	4.54436e-13	578.348	-0.765489	0.251031	-3.04938	0.00229314	0.0188574	3.36147	2.54864
WBGene00001396	fat-4	T13F2.1	372.027	6.82681	0.13137	51.9664	0	0	372.027	0.00781226	0.185181	0.0421872	0.966349	0.998148	372.027	1.98215	0.16681	11.8827	1.45631e-32	4.15358e-31	372.027	0.839667	0.179363	4.68137	2.84962e-06	1.57485e-05	372.027	-0.702393	0.247602	-2.83679	0.00455702	0.0311732	1.98996	1.27975
WBGene00001397	fat-5	W06D12.3	108.411	5.72073	0.119268	47.9655	0	0	108.411	0.221816	0.165826	1.33764	0.181012	0.981054	108.411	2.22634	0.18996	11.72	1.00618e-31	2.74267e-30	108.411	-0.349468	0.192759	-1.81298	0.0698347	0.119914	108.411	-0.450711	0.236188	-1.90827	0.0563557	0.182272	2.44816	1.77563
WBGene00001398	fat-6	VZK822L.1	526.349	7.40701	0.113082	65.5012	0	0	526.349	0.144589	0.159155	0.908481	0.363624	0.99478	526.349	2.43491	0.145598	16.7235	8.83811e-63	9.06766e-61	526.349	0.417951	0.156317	2.67373	0.00750119	0.0175519	526.349	-1.07241	0.213305	-5.02759	4.9667e-07	3.0135e-05	2.5795	1.3625
WBGene00001399	fat-7	F10D2.9	59.7577	6.33968	0.277984	22.8059	4.00412e-115	5.7512e-115	59.7577	0.577069	0.391815	1.47281	0.140802	0.968704	59.7577	1.49914	0.42289	3.545	0.000392617	0.000738921	59.7577	-2.40106	0.419403	-5.72493	1.03475e-08	9.22035e-08	59.7577	-0.180996	0.558057	-0.324332	0.745686	0.864171	2.07621	1.31815
WBGene00001401	fbf-1	H12I13.4	26.1935	4.86496	0.185846	26.1774	4.80642e-151	7.83084e-151	26.1935	0.0450656	0.26085	0.172765	0.862836	0.99478	26.1935	-0.690452	0.353581	-1.95274	0.0508503	0.067149	26.1935	-0.0852185	0.280306	-0.304019	0.761113	0.822461	26.1935	0.737442	0.459034	1.60651	0.108162	0.278801	-0.645386	0.0469899
WBGene00001402	fbf-2	F21H12.5	18.4392	4.53563	0.25492	17.7924	8.09986e-71	9.97726e-71	18.4392	0.0777926	0.358477	0.217009	0.828202	1	18.4392	-0.569599	0.474988	-1.19918	0.230456	0.269834	18.4392	-0.593573	0.386163	-1.5371	0.124268	0.193338	18.4392	0.986945	0.606577	1.62707	0.103722	0.271889	-0.491806	0.417346
WBGene00001403	fbl-1	F56H11.1	22.6018	5.47551	0.18907	28.9603	2.0842e-184	3.80805e-184	22.6018	-0.770212	0.271613	-2.83569	0.00457262	0.695564	22.6018	0.0412709	0.401308	0.102841	0.918089	0.929795	22.6018	-1.64527	0.321378	-5.11941	3.06486e-07	2.09437e-06	22.6018	1.14531	0.503636	2.27408	0.0229611	0.0978803	-0.728941	1.18658
WBGene00001404	fbp-1	K07A3.1	100.931	6.27488	0.121037	51.8426	0	0	100.931	-0.00893958	0.170283	-0.0524984	0.958132	0.997385	100.931	0.971783	0.180815	5.37446	7.68126e-08	2.55247e-07	100.931	0.0543968	0.178121	0.305392	0.760068	0.821832	100.931	-0.563016	0.255015	-2.20777	0.02726	0.110005	0.962844	0.408767
WBGene00001405	fce-1	C04F12.10	81.4099	6.04619	0.190112	31.8033	5.82564e-222	1.19506e-221	81.4099	-0.0388483	0.268308	-0.14479	0.884877	0.995157	81.4099	-0.0954334	0.261883	-0.364413	0.71555	0.743019	81.4099	0.512459	0.260924	1.96401	0.0495284	0.0902037	81.4099	0.00368192	0.384276	0.00958145	0.992355	0.995073	-0.134282	-0.0917515
WBGene00001411	fem-1	F35D6.1	51.5195	5.72937	0.118825	48.2167	0	0	51.5195	0.0536341	0.16628	0.322553	0.747034	0.99478	51.5195	-0.51138	0.222606	-2.29724	0.0216052	0.030359	51.5195	0.214125	0.179409	1.1935	0.232673	0.323927	51.5195	0.04329	0.304418	0.142206	0.886917	0.945357	-0.457746	-0.46809
WBGene00001412	fem-2	T19C3.8	64.2254	5.87661	0.136189	43.1503	0	0	64.2254	0.160382	0.190673	0.841135	0.400272	0.99478	64.2254	-1.44211	0.235832	-6.11499	9.65605e-10	4.06434e-09	64.2254	0.833837	0.190167	4.38477	1.16109e-05	5.60954e-05	64.2254	0.250293	0.330296	0.757785	0.44858	0.656175	-1.28173	-1.19182
WBGene00001413	fem-3	C01F6.4	38.4033	5.17975	0.156251	33.1501	5.63591e-241	1.23136e-240	38.4033	-0.255666	0.221582	-1.15382	0.248573	0.993234	38.4033	-2.57145	0.333545	-7.70945	1.26364e-14	9.19654e-14	38.4033	1.16228	0.215969	5.38168	7.37953e-08	5.69025e-07	38.4033	1.22592	0.443674	2.76311	0.00572542	0.0365315	-2.82711	-1.34553
WBGene00001414	fer-1	F43G9.6	25.9707	5.95457	0.235707	25.2626	8.2403e-141	1.29706e-140	25.9707	-0.494468	0.33452	-1.47814	0.13937	0.968704	25.9707	0.718036	0.473311	1.51705	0.129254	0.158368	25.9707	-2.84682	0.409478	-6.95231	3.59347e-12	5.12451e-11	25.9707	0.480689	0.590256	0.814375	0.41543	0.630899	0.223568	1.19873
WBGene00001423	fib-1	T01C3.7	390.342	8.37922	0.0811791	103.219	0	0	390.342	0.269842	0.114083	2.36531	0.0180151	0.759094	390.342	-0.561041	0.116653	-4.8095	1.51306e-06	4.13961e-06	390.342	0.515049	0.11174	4.60935	4.03934e-06	2.18598e-05	390.342	0.0806304	0.167885	0.480271	0.631035	0.794392	-0.291199	-0.480411
WBGene00001425	fis-2	F13B9.8	14.2997	4.1835	0.207423	20.1689	1.83601e-90	2.41973e-90	14.2997	0.0368367	0.290582	0.126769	0.899123	1	14.2997	0.80204	0.432093	1.85617	0.0634289	0.0823316	14.2997	-1.06586	0.371479	-2.86923	0.0041147	0.0104415	14.2997	-0.366237	0.546624	-0.669997	0.50286	1	0.838876	0.435803
WBGene00001426	fkb-1	F36H1.1	108.749	6.49157	0.154259	42.0823	0	0	108.749	-0.0972109	0.21785	-0.44623	0.655431	0.99478	108.749	1.59457	0.220415	7.23437	4.6771e-13	2.92052e-12	108.749	-0.546681	0.224933	-2.43041	0.0150816	0.0322547	108.749	-0.674673	0.310821	-2.17061	0.0299604	0.117428	1.49735	0.919893
WBGene00001427	fkb-2	Y18D10A.19	115.377	7.03965	0.11706	60.1373	0	0	115.377	0.252491	0.164321	1.53657	0.124398	0.965307	115.377	0.796665	0.187165	4.25648	2.07672e-05	4.77905e-05	115.377	-0.828604	0.177607	-4.66537	3.08063e-06	1.68943e-05	115.377	-0.569106	0.254975	-2.23201	0.0256145	0.104956	1.04916	0.22756
WBGene00001428	fkb-3	C05C8.3	16.8175	3.10477	0.364258	8.52355	1.54736e-17	1.60246e-17	16.8175	-0.177716	0.514998	-0.34508	0.730034	1	16.8175	1.9762	0.516401	3.82687	0.000129783	0.000263164	16.8175	0.0436517	0.53624	0.0814032	0.935121	0.95316	16.8175	-0.632531	0.721211	-0.877041	0.380465	0.603349	1.79848	1.34367
WBGene00001430	fkb-5	C50F2.6	21.3873	4.52954	0.228869	19.791	3.55842e-87	4.63517e-87	21.3873	-0.1375	0.323217	-0.425412	0.670536	0.99478	21.3873	1.63456	0.394317	4.14529	3.39386e-05	7.56958e-05	21.3873	-1.11121	0.379369	-2.9291	0.0033995	0.0088454	21.3873	-0.727755	0.516699	-1.40847	0.158992	0.360062	1.49706	0.906804
WBGene00001431	fkb-6	F31D4.3	122.632	7.16672	0.143638	49.8944	0	0	122.632	0.14785	0.202416	0.730424	0.465131	0.99478	122.632	-0.836779	0.215969	-3.87453	0.000106833	0.000219215	122.632	-0.0195346	0.199442	-0.0979462	0.921975	0.944216	122.632	0.244085	0.30755	0.793643	0.427403	0.642645	-0.688929	-0.592695
WBGene00001439	fkh-7	F26D12.1	36.1963	6.03652	0.22976	26.2731	3.89314e-152	6.3583e-152	36.1963	-0.507249	0.326126	-1.55538	0.119856	0.965307	36.1963	0.709759	0.376155	1.88688	0.0591769	0.0772878	36.1963	-1.77651	0.351946	-5.04769	4.47179e-07	2.94413e-06	36.1963	0.273957	0.509363	0.537841	0.590687	0.7649	0.202509	0.983715
WBGene00001441	fkh-9	K03C7.2	57.6578	5.11234	0.172741	29.5954	1.71221e-192	3.20692e-192	57.6578	-0.15917	0.244063	-0.652167	0.514293	0.99478	57.6578	0.885358	0.240849	3.67598	0.000236937	0.000462663	57.6578	0.677196	0.244267	2.77235	0.00556523	0.0136172	57.6578	-0.791398	0.358602	-2.2069	0.0273211	0.110187	0.726188	0.0939596
WBGene00001443	fli-1	B0523.5	58.4624	6.54712	0.112617	58.1359	0	0	58.4624	-0.119643	0.158957	-0.752677	0.451644	0.99478	58.4624	-0.350336	0.226855	-1.54432	0.122512	0.150782	58.4624	-0.781049	0.179506	-4.3511	1.35454e-05	6.45131e-05	58.4624	-0.355776	0.322092	-1.10458	0.269341	0.49468	-0.469979	-0.706113
WBGene00001444	flp-1	F23B2.5	71.8093	4.49787	0.206847	21.7449	7.72406e-105	1.0691e-104	71.8093	0.0986692	0.289754	0.340527	0.73346	0.99478	71.8093	0.884825	0.261338	3.38574	0.000709859	0.00127771	71.8093	1.63444	0.278659	5.86535	4.48177e-09	4.25538e-08	71.8093	-0.651911	0.395758	-1.64725	0.0995077	0.264391	0.983494	0.232914
WBGene00001446	flp-3	W07E11.2	17.7686	2.86202	0.333621	8.57866	9.59813e-18	9.94967e-18	17.7686	0.544229	0.459891	1.18339	0.236655	1	17.7686	0.794074	0.454631	1.74663	0.0807008	0.102676	17.7686	1.08085	0.465188	2.32346	0.0201543	0.0416564	17.7686	-0.732698	0.653953	-1.12041	0.262538	0.48693	1.3383	0.0613763
WBGene00001448	flp-5	C03G5.7	29.6474	3.49994	0.270125	12.9568	2.15133e-38	2.37086e-38	29.6474	0.253709	0.375777	0.675159	0.499575	0.99478	29.6474	1.4423	0.367869	3.92068	8.83012e-05	0.000183741	29.6474	0.792546	0.383959	2.06414	0.0390043	0.0734264	29.6474	-0.685417	0.523676	-1.30886	0.190583	0.402206	1.696	0.756879
WBGene00001449	flp-6	F07D3.2	14.0363	3.80996	0.240851	15.8187	2.31084e-56	2.70312e-56	14.0363	-0.636272	0.348245	-1.82708	0.0676871	1	14.0363	1.38404	0.435783	3.17597	0.00149335	0.00255298	14.0363	-0.779254	0.408467	-1.90775	0.0564232	0.100822	14.0363	0.324728	0.552061	0.58821	0.556392	1	0.747763	1.70876
WBGene00001451	flp-8	F31F6.4	13.9656	3.27752	0.40489	8.09484	5.73415e-16	5.91677e-16	13.9656	-1.06332	0.587697	-1.8093	0.0704051	1	13.9656	0.544328	0.536329	1.01492	0.310146	0.352795	13.9656	0.968458	0.553628	1.74929	0.0802401	0.13505	13.9656	-1.38247	0.913102	-1.51404	0.130017	1	-0.518989	-0.83814
WBGene00001452	flp-9	C36H8.3	60.4518	4.67154	0.207252	22.5404	1.66939e-112	2.37378e-112	60.4518	0.178242	0.290046	0.614531	0.538865	0.99478	60.4518	1.36392	0.28048	4.86281	1.15731e-06	3.2212e-06	60.4518	0.672023	0.29219	2.29995	0.0214509	0.0439185	60.4518	-0.486309	0.401412	-1.21149	0.225706	0.446745	1.54216	0.877613
WBGene00001454	flp-11	K02G10.4	34.4875	3.94208	0.245701	16.0442	6.27246e-58	7.37931e-58	34.4875	-0.0867435	0.346191	-0.250565	0.80215	0.99478	34.4875	1.18547	0.332484	3.56549	0.00036318	0.000687195	34.4875	0.865105	0.345174	2.50629	0.0122006	0.0268713	34.4875	-0.506487	0.485639	-1.04293	0.296981	0.522533	1.09872	0.67898
WBGene00001455	flp-12	C05E11.8	30.5434	4.47893	0.266044	16.8353	1.34598e-63	1.61198e-63	30.5434	-0.534966	0.379545	-1.40949	0.158689	0.973531	30.5434	1.62591	0.388712	4.18281	2.87926e-05	6.49041e-05	30.5434	-0.402456	0.394394	-1.02044	0.307519	0.406449	30.5434	0.141941	0.536158	0.264737	0.791212	0.890209	1.09094	1.76785
WBGene00001457	flp-14	Y37D8A.15	95.7356	5.42822	0.162754	33.3523	6.75738e-244	1.48916e-243	95.7356	-0.307144	0.231059	-1.32929	0.183753	0.981054	95.7356	1.30125	0.219852	5.91875	3.24393e-09	1.28281e-08	95.7356	0.681996	0.2288	2.98075	0.00287539	0.00760763	95.7356	-0.0308381	0.318263	-0.096895	0.92281	0.963384	0.994106	1.27041
WBGene00001458	flp-15	ZK525.1	13.7423	3.32272	0.232496	14.2915	2.47193e-46	2.79036e-46	13.7423	-0.369924	0.332836	-1.11143	0.266383	1	13.7423	1.43433	0.401237	3.57477	0.00035053	0.000666504	13.7423	-0.141375	0.384239	-0.367935	0.712922	0.784501	13.7423	-0.377003	0.533994	-0.706006	0.480185	1	1.06441	1.05733
WBGene00001460	flp-17	C52D10.11	12.905	3.4238	0.304186	11.2556	2.17335e-29	2.32978e-29	12.905	-0.597848	0.437349	-1.36698	0.171631	1	12.905	1.92226	0.489813	3.92447	8.69207e-05	0.000181124	12.905	-0.617047	0.48786	-1.26481	0.205941	0.293751	12.905	-0.513901	0.662509	-0.775689	0.437932	1	1.32441	1.40835
WBGene00001461	flp-18	Y48D7A.2	22.0486	3.34249	0.235475	14.1947	9.88298e-46	1.11306e-45	22.0486	0.00865328	0.329132	0.0262912	0.979025	0.998148	22.0486	1.9068	0.360263	5.2928	1.2046e-07	3.87561e-07	22.0486	0.216609	0.367657	0.589161	0.555754	0.646003	22.0486	-0.649251	0.476928	-1.36132	0.173413	0.379402	1.91545	1.25755
WBGene00001462	flp-19	M79.4	18.0628	3.47992	0.250955	13.8667	1.00832e-43	1.12873e-43	18.0628	-0.529142	0.361632	-1.46321	0.143411	1	18.0628	1.04236	0.389454	2.67647	0.00744031	0.0113276	18.0628	0.272127	0.379133	0.717762	0.472904	0.568671	18.0628	0.327748	0.534081	0.613667	0.539436	0.728526	0.513219	1.37011
WBGene00001465	flr-1	F02D10.5	16.3709	4.0883	0.280322	14.5843	3.53431e-48	4.01352e-48	16.3709	-1.11071	0.409707	-2.711	0.00670808	1	16.3709	2.93745	0.53071	5.53494	3.11336e-08	1.08601e-07	16.3709	-2.03723	0.526734	-3.86766	0.000109886	0.00042388	16.3709	0.343194	0.604521	0.567711	0.570231	0.75117	1.82674	3.28064
WBGene00001470	baz-2	ZK783.4	34.57	6.31256	0.158546	39.8153	0	0	34.57	-0.178672	0.224193	-0.796959	0.425475	0.99478	34.57	-0.619147	0.397739	-1.55667	0.11955	0.147407	34.57	-2.16987	0.278352	-7.7954	6.42026e-15	1.16814e-13	34.57	0.496114	0.505874	0.980708	0.326737	0.552503	-0.79782	-0.123033
WBGene00001475	fmi-1	F15B9.7	26.6192	6.10166	0.241784	25.2361	1.61138e-140	2.53368e-140	26.6192	-0.734773	0.343943	-2.13633	0.0326529	0.81039	26.6192	0.164494	0.44099	0.373011	0.70914	0.737702	26.6192	-2.28807	0.381819	-5.99256	2.06567e-09	2.05096e-08	26.6192	-0.619203	0.678065	-0.913192	0.361142	0.584702	-0.570279	-0.454709
WBGene00001478	fmo-3	Y39A1A.19	33.3385	4.50581	0.18471	24.394	1.98063e-131	3.01172e-131	33.3385	-0.350294	0.263238	-1.33071	0.183283	0.981054	33.3385	1.41848	0.3104	4.56985	4.88077e-06	1.236e-05	33.3385	-0.391225	0.298707	-1.30973	0.190288	0.275403	33.3385	0.675468	0.387698	1.74225	0.0814644	0.232369	1.06819	2.09395
WBGene00001479	fmo-4	F53F4.5	22.5273	3.70391	0.203672	18.1857	6.7047e-74	8.34641e-74	22.5273	-0.0821816	0.286079	-0.287269	0.773906	0.99478	22.5273	2.11204	0.341373	6.1869	6.13597e-10	2.64294e-09	22.5273	-0.239667	0.341878	-0.701032	0.483283	0.578262	22.5273	-1.005	0.442295	-2.27224	0.0230718	0.0981714	2.02986	1.10704
WBGene00001480	fmo-5	H24K24.5	31.3687	4.73586	0.339137	13.9644	2.56951e-44	2.87939e-44	31.3687	-0.107972	0.479202	-0.225316	0.821734	0.99478	31.3687	2.86245	0.498768	5.73903	9.52176e-09	3.55059e-08	31.3687	-1.55944	0.516964	-3.01653	0.00255687	0.00686573	31.3687	-1.18543	0.672615	-1.76241	0.0779994	0.225631	2.75448	1.67702
WBGene00001481	fog-1	Y54E10A.4	27.4943	4.47618	0.220421	20.3074	1.10566e-91	1.46293e-91	27.4943	0.163919	0.30855	0.531255	0.595242	0.99478	27.4943	-1.49193	0.382284	-3.90267	9.51357e-05	0.000196249	27.4943	0.876153	0.307141	2.85261	0.00433615	0.0109247	27.4943	1.00712	0.512027	1.96692	0.0491921	0.166348	-1.32801	-0.484812
WBGene00001482	fog-2	Y113G7B.5	19.8583	4.41316	0.253587	17.4029	7.84397e-68	9.5333e-68	19.8583	0.371087	0.354342	1.04726	0.294981	1	19.8583	-1.74641	0.456303	-3.82731	0.000129552	0.000262884	19.8583	0.613983	0.354537	1.73179	0.0833114	0.139257	19.8583	-0.136224	0.646582	-0.210683	0.833135	0.91335	-1.37533	-1.88264
WBGene00001485	fre-1	Y113G7A.8	27.8633	5.12433	0.174991	29.2834	1.68829e-188	3.12488e-188	27.8633	-0.0449018	0.246371	-0.182252	0.855385	0.99478	27.8633	-0.0206708	0.32421	-0.0637575	0.949163	0.955632	27.8633	-0.49595	0.273754	-1.81167	0.0700378	0.120235	27.8633	0.192202	0.42946	0.447544	0.654482	0.808818	-0.0655726	0.171531
WBGene00001488	frm-1	ZK270.2	215.858	7.16483	0.0953057	75.1773	0	0	215.858	-0.243827	0.134997	-1.80617	0.0708915	0.922535	215.858	1.41055	0.136957	10.2992	7.10636e-25	1.17701e-23	215.858	0.00404749	0.139138	0.0290898	0.976793	0.983902	215.858	-0.39516	0.193419	-2.04302	0.0410504	0.147514	1.16672	1.01539
WBGene00001489	frm-2	T04C9.6	31.63	3.43472	0.217277	15.808	2.73841e-56	3.20225e-56	31.63	0.295968	0.298429	0.991752	0.321319	0.99478	31.63	1.76251	0.307779	5.72654	1.02499e-08	3.80482e-08	31.63	0.736064	0.32187	2.28683	0.0222055	0.0452752	31.63	-0.727211	0.418822	-1.73633	0.0825063	0.234331	2.05847	1.0353
WBGene00001490	frm-3	H05G16.1	18.8355	5.15145	0.245185	21.0105	5.26213e-98	7.11669e-98	18.8355	-0.547861	0.349095	-1.56938	0.11656	1	18.8355	0.178871	0.443394	0.403414	0.686644	0.717329	18.8355	-1.39653	0.385214	-3.62532	0.000288604	0.00100848	18.8355	-0.145007	0.630254	-0.230078	0.818031	0.904058	-0.36899	0.033864
WBGene00001491	frm-4	C24A11.8	53.8263	5.83167	0.124344	46.8995	0	0	53.8263	-0.0898017	0.175184	-0.512613	0.608222	0.99478	53.8263	-0.0930775	0.218242	-0.426487	0.669753	0.70147	53.8263	0.0343538	0.188	0.182733	0.855007	0.895497	53.8263	-0.0927525	0.303576	-0.305533	0.75996	0.872017	-0.182879	-0.18583
WBGene00001493	frm-7	C51F7.1	54.365	5.79613	0.17554	33.0189	4.35623e-239	9.46454e-239	54.365	-0.454992	0.249759	-1.82172	0.0684972	0.914441	54.365	1.09377	0.281448	3.88623	0.000101811	0.000209202	54.365	-0.919868	0.270328	-3.40279	0.000667025	0.00212659	54.365	0.776782	0.367787	2.11204	0.0346828	0.131349	0.638781	1.87056
WBGene00001494	frm-8	H09G03.2	18.0659	5.04205	0.32549	15.4906	4.01289e-54	4.65065e-54	18.0659	-0.438137	0.461603	-0.949165	0.342537	1	18.0659	-0.900505	0.533486	-1.68796	0.091418	0.115102	18.0659	-0.776892	0.464021	-1.67426	0.0940795	0.153477	18.0659	-0.0286095	0.789976	-0.0362156	0.97111	0.986568	-1.33864	-0.929114
WBGene00001495	frm-9	F31B12.3	21.641	5.47698	0.184797	29.6377	4.87935e-193	9.15978e-193	21.641	-0.550326	0.263839	-2.08584	0.0369928	0.811344	21.641	0.562074	0.377616	1.48848	0.136624	0.166515	21.641	-1.72625	0.320622	-5.38406	7.2823e-08	5.62703e-07	21.641	-0.607213	0.546608	-1.11087	0.266622	0.492144	0.0117476	-0.0451394
WBGene00001496	frm-10	F25H9.5	69.0131	5.47136	0.162228	33.7264	2.37132e-249	5.33402e-249	69.0131	-0.118991	0.228969	-0.519681	0.603286	0.99478	69.0131	-0.311462	0.231099	-1.34774	0.177742	0.212113	69.0131	1.08263	0.222933	4.85628	1.19614e-06	7.16617e-06	69.0131	0.0966749	0.339178	0.285027	0.775624	0.880694	-0.430452	-0.214787
WBGene00001497	fars-1	T08B2.9	81.975	6.12945	0.152409	40.2171	0	0	81.975	0.133181	0.2142	0.62176	0.5341	0.99478	81.975	0.0755772	0.221805	0.340737	0.733302	0.759915	81.975	0.333078	0.214441	1.55324	0.120367	0.188135	81.975	-0.363454	0.32077	-1.13307	0.257186	0.480674	0.208758	-0.287876
WBGene00001498	fars-3	F22B5.9	75.6004	6.01744	0.132246	45.502	0	0	75.6004	0.316826	0.184538	1.71686	0.0860047	0.954102	75.6004	0.147734	0.208156	0.709723	0.477876	0.522277	75.6004	0.165873	0.19286	0.86007	0.389751	0.489225	75.6004	-0.373935	0.289888	-1.28993	0.197075	0.410864	0.46456	-0.226202
WBGene00001499	fsn-1	C26E6.5	99.1225	6.59009	0.100628	65.4897	0	0	99.1225	0.0574948	0.141151	0.40733	0.683766	0.99478	99.1225	-2.12728	0.205709	-10.3412	4.58625e-25	7.68222e-24	99.1225	0.81335	0.141472	5.74917	8.9681e-09	8.10861e-08	99.1225	1.17223	0.267499	4.38219	1.17491e-05	0.000340578	-2.06978	-0.955047
WBGene00001500	ftn-1	C54F6.14	25.0875	1.88726	0.285794	6.60358	4.01336e-11	4.08469e-11	25.0875	-0.0424734	0.397282	-0.10691	0.914861	0.995157	25.0875	5.48557	0.633702	8.65639	4.8695e-18	4.75178e-17	25.0875	-1.11529	0.670415	-1.66358	0.0961974	0.156282	25.0875	-1.29591	0.501512	-2.58401	0.00976592	0.0537087	5.4431	4.18966
WBGene00001501	ftn-2	D1037.3	1232.32	7.28367	0.0914244	79.6688	0	0	1232.32	0.210071	0.128077	1.64019	0.100965	0.954102	1232.32	2.52015	0.110697	22.7662	9.92826e-115	4.58375e-112	1232.32	1.71912	0.122329	14.0532	7.35803e-45	8.62758e-43	1232.32	-0.889643	0.16739	-5.3148	1.06776e-07	8.84334e-06	2.73022	1.6305
WBGene00001502	ftt-2	F52D10.3	230.548	6.98274	0.107791	64.7802	0	0	230.548	0.0337025	0.151695	0.222174	0.824179	0.99478	230.548	1.3945	0.146936	9.49048	2.29973e-21	2.89899e-20	230.548	0.349035	0.152402	2.29023	0.0220081	0.0449189	230.548	-0.727842	0.212553	-3.42428	0.00061643	0.00713561	1.4282	0.666655
WBGene00001503	fum-1	H14A12.2	341.262	7.99201	0.116701	68.4831	0	0	341.262	0.162595	0.164521	0.988291	0.32301	0.99478	341.262	0.56022	0.15393	3.63944	0.000273232	0.000528505	341.262	0.289854	0.159402	1.81839	0.0690046	0.11882	341.262	-0.502453	0.228017	-2.20358	0.0275542	0.110633	0.722815	0.0577668
WBGene00001505	fut-1	K08F8.3	15.2283	4.11524	0.229252	17.9507	4.7362e-72	5.86133e-72	15.2283	-0.160677	0.323878	-0.496104	0.619821	1	15.2283	1.15553	0.449782	2.5691	0.0101964	0.015198	15.2283	-1.17562	0.404923	-2.90332	0.00369235	0.00949699	15.2283	0.307403	0.538365	0.570994	0.568003	0.749704	0.994854	1.46294
WBGene00001508	fut-8	C10F3.6	16.9569	3.1623	0.257264	12.2921	9.99209e-35	1.08979e-34	16.9569	-0.569515	0.373039	-1.52669	0.126838	1	16.9569	2.29195	0.422119	5.42963	5.64704e-08	1.91057e-07	16.9569	-0.280644	0.427753	-0.656088	0.511767	0.605159	16.9569	-0.251096	0.540389	-0.464659	0.642176	0.80065	1.72244	2.04086
WBGene00001509	fzo-1	ZK1248.14	58.4601	5.90244	0.140734	41.9402	0	0	58.4601	0.229421	0.196881	1.16528	0.243906	0.993234	58.4601	-1.13229	0.247893	-4.56766	4.93189e-06	1.2481e-05	58.4601	0.401217	0.201013	1.99597	0.0459368	0.0846223	58.4601	0.214814	0.341185	0.629611	0.528949	0.722088	-0.902869	-0.917477
WBGene00001510	fzr-1	ZK1307.6	40.7424	5.76702	0.132941	43.3804	0	0	40.7424	-0.0156322	0.186892	-0.0836425	0.933341	0.995931	40.7424	-0.135661	0.273339	-0.49631	0.619676	0.654777	40.7424	-0.739058	0.217707	-3.39474	0.000686926	0.00218251	40.7424	0.492075	0.345396	1.42467	0.154253	0.353556	-0.151293	0.356414
WBGene00001511	fzy-1	ZK177.6	82.9363	6.632	0.138355	47.9345	0	0	82.9363	0.235904	0.194333	1.21391	0.224782	0.993234	82.9363	-2.46222	0.276404	-8.90806	5.19342e-19	5.52793e-18	82.9363	0.327022	0.193172	1.6929	0.0904744	0.148982	82.9363	1.32852	0.356219	3.72949	0.000191866	0.00296624	-2.22632	-1.13371
WBGene00001513	gad-1	T05H4.14	79.5668	6.47383	0.126797	51.0567	0	0	79.5668	0.235323	0.177696	1.3243	0.185405	0.981054	79.5668	-0.583678	0.219067	-2.66438	0.00771297	0.0117234	79.5668	-0.144108	0.185794	-0.775635	0.437965	0.536881	79.5668	0.308671	0.294757	1.0472	0.295006	0.521197	-0.348356	-0.275007
WBGene00001514	xnd-1	C05D2.5	88.4981	6.83348	0.178976	38.181	0	0	88.4981	0.0583819	0.252564	0.231157	0.817193	0.99478	88.4981	-2.37627	0.303346	-7.83352	4.74379e-15	3.59409e-14	88.4981	0.180731	0.244854	0.73812	0.460441	0.557678	88.4981	1.49129	0.409052	3.64571	0.000266654	0.00380927	-2.31789	-0.884984
WBGene00001516	gap-2	ZK899.8	36.186	6.00529	0.164494	36.5077	8.36932e-292	2.16699e-291	36.186	-0.0651843	0.232085	-0.280863	0.778815	0.99478	36.186	0.292807	0.318744	0.918629	0.35829	0.401683	36.186	-1.51958	0.270594	-5.61572	1.95747e-08	1.64878e-07	36.186	-0.342053	0.429946	-0.795573	0.42628	0.641634	0.227623	-0.0492458
WBGene00001520	gas-1	K09A9.5	89.4511	6.31443	0.187092	33.7504	1.05352e-249	2.37412e-249	89.4511	-0.102868	0.264322	-0.389176	0.697146	0.99478	89.4511	1.63814	0.262288	6.24558	4.22226e-10	1.85323e-09	89.4511	-0.682943	0.269556	-2.53358	0.0112903	0.0251286	89.4511	-0.762691	0.373908	-2.03978	0.0413719	0.148134	1.53527	0.87545
WBGene00001522	gbh-1	D2089.5	41.9499	5.20785	0.186005	27.9985	1.69583e-172	2.96921e-172	41.9499	-0.0901153	0.262377	-0.343457	0.731255	0.99478	41.9499	2.29456	0.325865	7.04142	1.90289e-12	1.11035e-11	41.9499	-1.46559	0.321111	-4.56411	5.01618e-06	2.66196e-05	41.9499	-0.214997	0.388809	-0.552963	0.580289	0.757037	2.20444	2.07956
WBGene00001526	gck-1	T19A5.2	47.5574	5.88761	0.147685	39.8659	0	0	47.5574	-0.142641	0.208615	-0.683754	0.494131	0.99478	47.5574	0.0366329	0.260535	0.140606	0.888181	0.90322	47.5574	-0.53534	0.226489	-2.36365	0.0180961	0.0378579	47.5574	0.243274	0.349901	0.695263	0.48689	0.688022	-0.106008	0.279906
WBGene00001527	gcs-1	F37B12.2	70.7115	5.26188	0.180908	29.0859	5.41053e-186	9.93478e-186	70.7115	0.0669618	0.254173	0.26345	0.792204	0.99478	70.7115	0.639511	0.244531	2.61525	0.00891614	0.0134361	70.7115	0.899956	0.25016	3.59752	0.000321264	0.00110432	70.7115	-0.652691	0.362659	-1.79973	0.0719025	0.214046	0.706472	-0.0131801
WBGene00001535	gcy-8	C49H3.1	29.7992	5.35457	0.182763	29.298	1.1006e-188	2.03866e-188	29.7992	-0.586567	0.261517	-2.24294	0.0249007	0.780931	29.7992	2.90567	0.411767	7.05658	1.70653e-12	1.00208e-11	29.7992	-2.79943	0.39762	-7.04048	1.91579e-12	2.78581e-11	29.7992	0.18017	0.41327	0.435961	0.662865	0.813468	2.3191	3.08584
WBGene00001558	gdi-1	Y57G11C.10	182.655	7.14786	0.0839216	85.1731	0	0	182.655	0.177705	0.117329	1.51459	0.129875	0.965307	182.655	0.582816	0.130682	4.4598	8.20349e-06	2.01192e-05	182.655	0.122196	0.124217	0.983731	0.325248	0.424338	182.655	-0.301432	0.179883	-1.67571	0.0937941	0.254495	0.760522	0.281384
WBGene00001559	gei-1	F45H7.2	25.7183	5.20513	0.213969	24.3266	1.02674e-130	1.55612e-130	25.7183	-0.38872	0.303972	-1.2788	0.200966	0.986533	25.7183	1.32143	0.388959	3.39734	0.00068044	0.00122895	25.7183	-1.68403	0.361637	-4.6567	3.21316e-06	1.75689e-05	25.7183	0.225257	0.485743	0.463737	0.642836	0.800853	0.932708	1.54669
WBGene00001560	gei-3	T22H6.6	116	6.15487	0.144278	42.6598	0	0	116	-0.215421	0.204185	-1.05503	0.291413	0.99478	116	1.5945	0.202482	7.87479	3.41321e-15	2.61549e-14	116	0.000448074	0.208513	0.00214891	0.998285	0.999097	116	-0.447914	0.287224	-1.55946	0.118887	0.296032	1.37908	1.14659
WBGene00001561	gei-4	W07B3.2	65.0369	6.72104	0.130455	51.52	0	0	65.0369	-0.107898	0.184218	-0.585709	0.558071	0.99478	65.0369	-0.964034	0.258626	-3.72752	0.000193373	0.000381631	65.0369	-0.817489	0.197822	-4.13244	3.58931e-05	0.000157036	65.0369	0.822513	0.337419	2.43766	0.0147826	0.0721704	-1.07193	-0.141521
WBGene00001562	lin-66	B0513.1	71.1892	6.82657	0.133278	51.2205	0	0	71.1892	-0.279231	0.188804	-1.47895	0.139155	0.968704	71.1892	0.996745	0.238442	4.18025	2.91194e-05	6.55608e-05	71.1892	-1.69576	0.218711	-7.7534	8.94612e-15	1.60401e-13	71.1892	0.0602526	0.307331	0.196051	0.84457	0.920808	0.717515	1.057
WBGene00001563	gei-6	C05C8.4	78.967	6.88574	0.120786	57.0079	0	0	78.967	0.0620147	0.170022	0.364745	0.715302	0.99478	78.967	-0.880663	0.225282	-3.90916	9.2618e-05	0.000191483	78.967	-0.54819	0.17966	-3.05126	0.00227885	0.00621405	78.967	0.0799865	0.310336	0.257741	0.796607	0.891999	-0.818649	-0.800677
WBGene00001564	icl-1	C05E4.9	234.241	7.81603	0.151583	51.5626	0	0	234.241	0.0611107	0.214042	0.285509	0.775254	0.99478	234.241	1.74247	0.208337	8.36371	6.07786e-17	5.40278e-16	234.241	-1.24203	0.215698	-5.7582	8.50133e-09	7.74344e-08	234.241	-0.183195	0.294038	-0.623032	0.533263	0.724538	1.80358	1.55928
WBGene00001565	gei-8	C14B9.6	27.2135	5.4135	0.149365	36.2434	1.26468e-287	3.23035e-287	27.2135	-0.08947	0.210495	-0.425046	0.670803	0.99478	27.2135	0.421279	0.33857	1.24429	0.213394	0.25145	27.2135	-1.44541	0.273652	-5.28194	1.27822e-07	9.33945e-07	27.2135	0.251621	0.412644	0.609777	0.54201	0.730484	0.331809	0.672899
WBGene00001566	acdh-13	C28C12.9	31.3003	5.88746	0.160377	36.7102	5.03008e-295	1.31716e-294	31.3003	-0.259782	0.227206	-1.14338	0.252881	0.993234	31.3003	1.08998	0.347021	3.14096	0.00168395	0.00285764	31.3003	-2.22596	0.302052	-7.36944	1.71345e-13	2.73375e-12	31.3003	-0.141327	0.42622	-0.331584	0.740204	0.861769	0.830196	0.94865
WBGene00001568	snpc-4	F32H2.1	49.7495	6.14103	0.196316	31.2813	8.37574e-215	1.67856e-214	49.7495	0.0845392	0.276748	0.305473	0.760006	0.99478	49.7495	-1.22381	0.328498	-3.72545	0.000194964	0.000384566	49.7495	-0.320133	0.277581	-1.15329	0.248789	0.341918	49.7495	0.510317	0.453694	1.12481	0.260671	0.484292	-1.13927	-0.713488
WBGene00001571	gei-14	K01C8.5	50.635	6.4098	0.142048	45.1243	0	0	50.635	0.176663	0.199561	0.885259	0.376017	0.99478	50.635	-1.44155	0.348105	-4.14112	3.45611e-05	7.70144e-05	50.635	-1.23501	0.226197	-5.45986	4.76504e-08	3.76281e-07	50.635	1.35826	0.41766	3.25207	0.00114567	0.0114026	-1.26488	-0.0832874
WBGene00001572	gei-15	M03A8.4	16.1338	4.62592	0.266178	17.379	1.18995e-67	1.44527e-67	16.1338	-0.488832	0.378983	-1.28985	0.197102	1	16.1338	1.603	0.489909	3.27203	0.00106779	0.0018709	16.1338	-1.89842	0.460858	-4.11932	3.8e-05	0.00016483	16.1338	-0.0562355	0.613381	-0.0916812	0.926951	0.966022	1.11416	1.54676
WBGene00001574	gei-17	W10D5.3	112.352	6.9003	0.108125	63.8178	0	0	112.352	0.0180002	0.152177	0.118285	0.905842	0.995157	112.352	-0.829688	0.181434	-4.57294	4.80934e-06	1.21875e-05	112.352	0.21679	0.154642	1.40188	0.160952	0.240096	112.352	0.491614	0.249394	1.97123	0.0486972	0.16502	-0.811688	-0.338075
WBGene00001577	gem-4	T12A7.1	19.2991	5.0907	0.264557	19.2424	1.63536e-82	2.09221e-82	19.2991	-0.487271	0.375996	-1.29595	0.194994	1	19.2991	0.458234	0.467765	0.979624	0.327272	0.370167	19.2991	-1.58627	0.41769	-3.79771	0.000146036	0.000548155	19.2991	0.474895	0.617777	0.768716	0.442062	0.652582	-0.0290371	0.933129
WBGene00001578	ges-1	R12A1.4	24.3102	4.84046	0.207102	23.3724	8.16617e-121	1.19666e-120	24.3102	-0.356272	0.294394	-1.21019	0.226207	0.993234	24.3102	2.43773	0.389287	6.26203	3.79991e-10	1.67682e-09	24.3102	-1.79061	0.380045	-4.71158	2.45799e-06	1.37554e-05	24.3102	-0.875517	0.475625	-1.84077	0.0656549	0.202651	2.08145	1.56221
WBGene00001579	gex-2	F56A11.1	37.823	5.8921	0.204128	28.8647	3.31455e-183	6.0292e-183	37.823	-0.162843	0.288592	-0.564268	0.572572	0.99478	37.823	0.36128	0.332327	1.08712	0.276982	0.319199	37.823	-1.11271	0.306638	-3.62874	0.00028481	0.000998052	37.823	-0.433967	0.470756	-0.921852	0.356606	0.580418	0.198437	-0.0726868
WBGene00001580	gex-3	F28D1.10	76.716	6.54313	0.124443	52.5792	0	0	76.716	-0.0215736	0.175322	-0.123051	0.902066	0.995157	76.716	-0.514388	0.211318	-2.4342	0.0149249	0.0215839	76.716	-0.115592	0.181778	-0.635895	0.524845	0.617067	76.716	0.0324915	0.295959	0.109784	0.912581	0.958168	-0.535962	-0.481897
WBGene00001581	gfi-1	F57F4.3	350.562	7.33425	0.131027	55.9753	0	0	350.562	-0.00113344	0.184893	-0.00613024	0.995109	0.998148	350.562	2.35254	0.172991	13.5992	4.04725e-42	1.7382e-40	350.562	-0.163043	0.183662	-0.887734	0.374684	0.474586	350.562	-0.711289	0.249479	-2.8511	0.00435689	0.0303716	2.35141	1.64125
WBGene00001582	gfi-2	K02A11.1	76.0798	5.74757	0.138983	41.3544	0	0	76.0798	0.337753	0.1936	1.7446	0.0810551	0.949683	76.0798	-0.429837	0.212885	-2.0191	0.043477	0.0581609	76.0798	0.794021	0.195005	4.0718	4.66517e-05	0.000197942	76.0798	-0.0199636	0.299639	-0.0666255	0.94688	0.974186	-0.0920834	-0.4498
WBGene00001583	gfi-3	M163.4	29.6539	6.04525	0.199032	30.3733	1.23874e-202	2.4011e-202	29.6539	-0.457553	0.282611	-1.61902	0.105443	0.954102	29.6539	0.227448	0.374673	0.607056	0.543814	0.583295	29.6539	-1.89604	0.32087	-5.90907	3.44042e-09	3.32214e-08	29.6539	-0.764907	0.563641	-1.35708	0.174755	0.381226	-0.230105	-0.537459
WBGene00001584	nrde-4	F45E4.10	55.7457	6.11285	0.246355	24.8132	6.45532e-136	9.96353e-136	55.7457	0.0467501	0.347774	0.134427	0.893065	0.995157	55.7457	-0.314916	0.353995	-0.889606	0.373677	0.417161	55.7457	-0.44261	0.342354	-1.29284	0.196066	0.281979	55.7457	0.293206	0.506691	0.578667	0.562814	0.746377	-0.268166	-0.0217104
WBGene00001589	gip-1	H04J21.3	41.4961	5.76092	0.181878	31.6747	3.4689e-220	7.0689e-220	41.4961	0.101368	0.255897	0.396127	0.692011	0.99478	41.4961	-0.569744	0.315009	-1.80866	0.070504	0.0907498	41.4961	-0.456119	0.267557	-1.70476	0.0882399	0.146032	41.4961	0.347534	0.425889	0.816019	0.414489	0.629916	-0.468376	-0.222211
WBGene00001590	C45G3.3	C45G3.3	21.8298	4.08746	0.21425	19.078	3.85026e-81	4.90461e-81	21.8298	0.266511	0.297628	0.895451	0.370546	0.99478	21.8298	-1.62143	0.419641	-3.86385	0.000111614	0.000228265	21.8298	0.836744	0.304564	2.74735	0.00600782	0.0145603	21.8298	1.33891	0.532372	2.51498	0.0119038	0.061848	-1.35492	-0.282523
WBGene00001591	glc-1	F11A5.10	28.6109	3.34586	0.302193	11.0719	1.71636e-28	1.83404e-28	28.6109	0.0341423	0.42403	0.0805185	0.935825	0.995931	28.6109	0.607905	0.388051	1.56656	0.117218	0.144749	28.6109	1.61019	0.407796	3.94853	7.86331e-05	0.00031415	28.6109	-0.392964	0.58488	-0.671871	0.501666	0.700259	0.642047	0.214941
WBGene00001595	gld-1	T23G11.3	247.475	7.93133	0.17716	44.7694	0	0	247.475	0.0920211	0.250252	0.367714	0.713086	0.99478	247.475	-1.82359	0.239392	-7.61757	2.58501e-14	1.83082e-13	247.475	0.64801	0.236846	2.736	0.00621913	0.0149986	247.475	1.1109	0.350899	3.16586	0.00154626	0.0141544	-1.73157	-0.71269
WBGene00001596	gld-2	ZC308.1	89.5831	6.8694	0.100762	68.1747	0	0	89.5831	0.00709819	0.141732	0.0500818	0.960057	0.997385	89.5831	-0.161286	0.186231	-0.866053	0.386461	0.430521	89.5831	-0.527345	0.156015	-3.3801	0.000724602	0.0022819	89.5831	-0.0484184	0.25269	-0.191612	0.848046	0.923151	-0.154188	-0.209705
WBGene00001597	gld-3	T07F8.3	125.134	7.2341	0.166754	43.382	0	0	125.134	0.057838	0.235382	0.24572	0.805899	0.99478	125.134	-2.49756	0.264819	-9.4312	4.05417e-21	4.99417e-20	125.134	0.508514	0.225453	2.25552	0.0241007	0.0485497	125.134	1.02974	0.370802	2.77706	0.00548528	0.0353671	-2.43973	-1.46782
WBGene00001598	glh-1	T21G5.3	249.653	7.6251	0.0999564	76.2842	0	0	249.653	0.101061	0.140703	0.718255	0.4726	0.99478	249.653	-0.732416	0.142499	-5.13981	2.75014e-07	8.38782e-07	249.653	0.825931	0.136512	6.05024	1.44627e-09	1.46552e-08	249.653	0.186362	0.2072	0.899432	0.368423	0.592765	-0.631356	-0.546054
WBGene00001599	glh-2	C55B7.1	59.7366	6.52255	0.109263	59.6961	0	0	59.7366	0.168796	0.152952	1.10359	0.269772	0.993234	59.7366	-1.33092	0.262719	-5.06594	4.06383e-07	1.21046e-06	59.7366	-0.642795	0.173231	-3.71062	0.000206748	0.000749754	59.7366	0.556853	0.335205	1.66123	0.0966669	0.259157	-1.16212	-0.774065
WBGene00001601	glh-4	T12F5.3	52.7473	6.12401	0.200125	30.601	1.18772e-205	2.31863e-205	52.7473	-0.289573	0.283408	-1.02175	0.306898	0.99478	52.7473	-1.10382	0.313451	-3.52151	0.000429095	0.000802666	52.7473	-0.0355588	0.278818	-0.127534	0.898518	0.925841	52.7473	0.615488	0.446416	1.37873	0.167978	0.371344	-1.39339	-0.488333
WBGene00001602	gln-1	C45B2.5	15.8344	4.14918	0.225024	18.4388	6.41529e-76	8.03761e-76	15.8344	-0.317585	0.31992	-0.992701	0.320856	1	15.8344	0.946404	0.394013	2.40196	0.0163074	0.0234545	15.8344	-0.55443	0.363504	-1.52524	0.1272	0.197359	15.8344	-0.594855	0.549442	-1.08265	0.278963	0.504967	0.62882	0.351549
WBGene00001604	gln-3	Y105C5B.28	242.764	6.32892	0.12697	49.8457	0	0	242.764	0.0796053	0.178376	0.446279	0.655396	0.99478	242.764	2.29356	0.169554	13.527	1.08297e-41	4.57135e-40	242.764	0.37525	0.18061	2.07768	0.0377386	0.0713345	242.764	-0.631182	0.240419	-2.62535	0.00865606	0.0493204	2.37316	1.66238
WBGene00001606	gln-5	F26D10.10	175.572	7.52563	0.0978037	76.9463	0	0	175.572	0.268711	0.137234	1.95805	0.0502242	0.863497	175.572	-3.03914	0.201025	-15.1182	1.22794e-51	8.39889e-50	175.572	0.831688	0.134008	6.20624	5.42672e-10	5.79294e-09	175.572	1.26704	0.260019	4.87289	1.09978e-06	5.70985e-05	-2.77043	-1.7721
WBGene00001607	gln-6	C28D4.3	442.555	8.79343	0.209558	41.9618	0	0	442.555	0.255535	0.296157	0.862838	0.388227	0.99478	442.555	-2.63312	0.272313	-9.66947	4.06462e-22	5.35211e-21	442.555	0.857376	0.278148	3.08244	0.00205312	0.00566334	442.555	1.09956	0.405918	2.70882	0.00675236	0.0412319	-2.37759	-1.53357
WBGene00001609	glp-1	F02A9.6	175.706	8.06788	0.198695	40.6044	0	0	175.706	-0.118882	0.280938	-0.423163	0.672177	0.99478	175.706	-2.39365	0.28632	-8.36005	6.26914e-17	5.55944e-16	175.706	-0.0587068	0.266805	-0.220037	0.825843	0.87277	175.706	1.12649	0.413201	2.72626	0.00640568	0.0397187	-2.51253	-1.26716
WBGene00001620	glt-1	C12D12.2	107.331	5.14467	0.146263	35.1741	4.97378e-271	1.20899e-270	107.331	-0.0255404	0.205364	-0.124367	0.901025	0.995157	107.331	1.60868	0.192562	8.3541	6.5936e-17	5.83316e-16	107.331	1.04783	0.205052	5.11008	3.22015e-07	2.19036e-06	107.331	-0.652191	0.281227	-2.31909	0.0203904	0.0898516	1.58314	0.956493
WBGene00001628	gly-3	ZK688.8	54.8825	5.73664	0.147549	38.8794	0	0	54.8825	0.069998	0.207175	0.337869	0.735462	0.99478	54.8825	-0.842077	0.249423	-3.3761	0.000735203	0.00132043	54.8825	0.4116	0.210883	1.95179	0.0509631	0.0923839	54.8825	0.392637	0.343496	1.14306	0.253014	0.47582	-0.772079	-0.44944
WBGene00001629	gly-4	Y116F11B.12	27.2449	4.80692	0.247799	19.3985	7.95266e-84	1.02114e-83	27.2449	0.0287509	0.349009	0.0823785	0.934346	0.995931	27.2449	0.738007	0.385084	1.91649	0.0553034	0.0726268	27.2449	-0.560796	0.369109	-1.51933	0.128681	0.199198	27.2449	-0.0844022	0.525126	-0.160727	0.872308	0.937677	0.766758	0.653605
WBGene00001630	gly-5	Y39E4B.12	63.6019	5.63568	0.16121	34.9586	9.5723e-268	2.30178e-267	63.6019	-0.0944519	0.227433	-0.415295	0.677926	0.99478	63.6019	0.499436	0.236	2.11625	0.0343233	0.0466764	63.6019	0.293338	0.230605	1.27203	0.203361	0.290792	63.6019	-0.327009	0.339845	-0.962229	0.335935	0.561128	0.404984	0.172427
WBGene00001631	gly-6	H38K22.5	23.2822	5.18143	0.233777	22.164	7.6414e-109	1.07436e-108	23.2822	-0.773862	0.334849	-2.31107	0.0208287	0.769638	23.2822	0.261133	0.395932	0.659539	0.50955	0.551751	23.2822	-1.00019	0.356431	-2.80612	0.00501422	0.0124295	23.2822	0.750923	0.538172	1.39532	0.162918	0.366205	-0.512729	1.01206
WBGene00001632	gly-7	Y46H3A.6	48.0458	5.74174	0.148355	38.7028	0	0	48.0458	-0.00718928	0.208746	-0.0344403	0.972526	0.998148	48.0458	-0.420388	0.255967	-1.64235	0.100517	0.125616	48.0458	-0.0121852	0.218812	-0.0556878	0.95559	0.968837	48.0458	0.101592	0.353879	0.287081	0.77405	0.879769	-0.427577	-0.318796
WBGene00001633	gly-8	Y66A7A.6	43.424	3.53692	0.257128	13.7555	4.71923e-43	5.27158e-43	43.424	0.182902	0.358145	0.510692	0.609566	0.99478	43.424	2.31915	0.33645	6.89299	5.46298e-12	3.0365e-11	43.424	0.878842	0.364706	2.40973	0.0159644	0.0338876	43.424	-1.28315	0.485414	-2.64342	0.00820743	0.0478217	2.50205	1.036
WBGene00001635	gly-10	Y45F10D.3	49.973	5.88993	0.149909	39.29	0	0	49.973	0.0276343	0.210889	0.131037	0.895746	0.995157	49.973	-0.504412	0.262443	-1.92198	0.0546078	0.0718087	49.973	-0.179788	0.221696	-0.810969	0.417384	0.516711	49.973	0.248353	0.357563	0.694573	0.487323	0.688022	-0.476778	-0.256059
WBGene00001638	gly-13	B0416.6	34.2592	4.7334	0.157957	29.9663	2.6951e-197	5.13641e-197	34.2592	-0.250121	0.224118	-1.11602	0.264412	0.993234	34.2592	1.85798	0.305165	6.08845	1.14007e-09	4.76072e-09	34.2592	-0.992098	0.28949	-3.42706	0.000610163	0.00196552	34.2592	0.423927	0.345681	1.22635	0.220066	0.440796	1.60786	2.28191
WBGene00001645	gly-20	C03E10.4	58.5108	5.66697	0.163699	34.6181	1.34873e-262	3.18919e-262	58.5108	0.120094	0.229849	0.522492	0.601328	0.99478	58.5108	-1.7995	0.27735	-6.48821	8.68624e-11	4.15309e-10	58.5108	0.969531	0.224948	4.31003	1.63234e-05	7.64848e-05	58.5108	0.830484	0.380709	2.18142	0.0291526	0.115301	-1.67941	-0.96902
WBGene00001647	gna-2	T23G11.2	169.78	7.60735	0.188333	40.393	0	0	169.78	0.315231	0.265769	1.18611	0.23558	0.993234	169.78	-2.97465	0.286353	-10.3881	2.81013e-25	4.78305e-24	169.78	0.577596	0.252283	2.28947	0.022052	0.044987	169.78	1.21758	0.402199	3.02731	0.00246741	0.0199139	-2.65942	-1.75707
WBGene00001648	goa-1	C26C6.2	84.4274	6.36498	0.130895	48.6268	0	0	84.4274	-0.0305745	0.184432	-0.165776	0.868333	0.99478	84.4274	0.0499494	0.202876	0.246206	0.805522	0.827363	84.4274	0.068734	0.188964	0.363742	0.71605	0.78724	84.4274	-0.110012	0.287198	-0.383054	0.70168	0.839136	0.0193749	-0.0600629
WBGene00001649	gob-1	H13N06.3	48.6607	5.81734	0.190103	30.601	1.18595e-205	2.31579e-205	48.6607	-0.527502	0.270636	-1.94912	0.0512814	0.869694	48.6607	1.41172	0.295626	4.77536	1.79383e-06	4.8592e-06	48.6607	-1.06885	0.290779	-3.67581	0.0002371	0.000850634	48.6607	-0.0451342	0.402325	-0.112183	0.910678	0.957182	0.884219	1.36659
WBGene00001650	gon-1	F25H8.3	25.4347	5.42259	0.191739	28.2812	5.89353e-176	1.04452e-175	25.4347	-0.434478	0.272798	-1.59267	0.111234	0.955072	25.4347	1.06576	0.375449	2.83862	0.00453092	0.00712429	25.4347	-1.83465	0.335743	-5.46445	4.64347e-08	3.67645e-07	25.4347	0.205942	0.468191	0.439867	0.660033	0.811568	0.631278	1.2717
WBGene00001651	gon-2	T01H8.5	58.0978	5.69856	0.152571	37.3502	2.51611e-305	6.7661e-305	58.0978	-0.352811	0.216872	-1.62681	0.103777	0.954102	58.0978	1.46984	0.247804	5.93144	3.00281e-09	1.19065e-08	58.0978	-0.733077	0.24115	-3.03993	0.00236636	0.00641479	58.0978	0.132362	0.323116	0.409641	0.682069	0.82625	1.11703	1.6022
WBGene00001653	gon-4	K04D7.5	60.2624	6.58362	0.131391	50.1071	0	0	60.2624	-0.0625824	0.185349	-0.337647	0.735629	0.99478	60.2624	-1.19707	0.275723	-4.34156	1.41476e-05	3.33892e-05	60.2624	-0.771795	0.200248	-3.8542	0.00011611	0.000444683	60.2624	1.04763	0.351605	2.97956	0.00288661	0.0225642	-1.25965	-0.149441
WBGene00001660	gop-1	C34E10.3	30.3025	5.09532	0.217366	23.4412	1.62432e-121	2.38594e-121	30.3025	-0.25149	0.307854	-0.816912	0.413979	0.99478	30.3025	-0.255977	0.35165	-0.72793	0.466656	0.511453	30.3025	-0.158532	0.315592	-0.502331	0.615435	0.700064	30.3025	0.661065	0.482305	1.37064	0.170488	0.375952	-0.507466	0.405088
WBGene00001661	gop-2	C34E10.2	53.5245	6.01575	0.160463	37.4898	1.34951e-307	3.65292e-307	53.5245	0.100443	0.225682	0.445062	0.656275	0.99478	53.5245	-1.08391	0.28444	-3.81067	0.000138593	0.000279265	53.5245	-0.0992136	0.231456	-0.428649	0.668178	0.745482	53.5245	0.731999	0.380482	1.92388	0.0543702	0.177685	-0.983464	-0.351907
WBGene00001662	gop-3	C34E10.1	59.1432	5.79748	0.171426	33.8192	1.02959e-250	2.33086e-250	59.1432	-0.0254661	0.24164	-0.105389	0.916068	0.995157	59.1432	-0.197837	0.25755	-0.76815	0.442398	0.487251	59.1432	0.264108	0.242058	1.09109	0.275232	0.371214	59.1432	0.0649918	0.367544	0.176827	0.859644	0.929955	-0.223303	-0.132845
WBGene00001679	gpb-1	F13D12.7	111.637	6.70597	0.141106	47.5243	0	0	111.637	-0.277092	0.199876	-1.38632	0.16565	0.973531	111.637	0.024921	0.203852	0.122251	0.9027	0.915842	111.637	0.147668	0.197837	0.746411	0.455419	0.553043	111.637	0.394319	0.292097	1.34996	0.177029	0.383912	-0.252171	0.41924
WBGene00001680	gpb-2	F52A8.2	14.1134	3.77733	0.29669	12.7316	3.948e-37	4.33341e-37	14.1134	-0.452712	0.423142	-1.06988	0.284673	1	14.1134	2.07931	0.518465	4.01052	6.05851e-05	0.000129986	14.1134	-1.3229	0.507008	-2.60922	0.00907482	0.0207798	14.1134	-0.0540928	0.63862	-0.0847025	0.932498	1	1.6266	2.02522
WBGene00001682	gpc-2	F08B6.2	37.2329	4.93023	0.173948	28.3431	1.01713e-176	1.80441e-176	37.2329	0.148787	0.243172	0.611857	0.540632	0.99478	37.2329	0.180577	0.273784	0.659561	0.509536	0.551751	37.2329	0.370405	0.253705	1.45998	0.144295	0.218825	37.2329	-0.412562	0.387285	-1.06527	0.286755	0.512843	0.329364	-0.231985
WBGene00001683	gpd-1	T09F3.3	153.372	7.47663	0.12702	58.862	0	0	153.372	0.215923	0.17886	1.20722	0.227349	0.993234	153.372	-2.44532	0.222443	-10.993	4.12887e-28	8.49581e-27	153.372	0.385825	0.174006	2.21731	0.0266016	0.0529096	153.372	1.33799	0.297115	4.50326	6.69178e-06	0.000219598	-2.2294	-1.10733
WBGene00001684	gpd-2	K10B3.8	192.7	7.69018	0.126221	60.9264	0	0	192.7	-0.0571613	0.17827	-0.320644	0.74848	0.99478	192.7	1.64102	0.180812	9.07585	1.12798e-19	1.27602e-18	192.7	-1.09336	0.184228	-5.93484	2.94137e-09	2.8627e-08	192.7	-0.840495	0.255385	-3.2911	0.00099798	0.0102858	1.58386	0.800523
WBGene00001685	gpd-3	K10B3.7	274.777	7.55296	0.149257	50.6039	0	0	274.777	-0.0367791	0.210832	-0.174448	0.861513	0.99478	274.777	1.91653	0.197266	9.71547	2.59049e-22	3.46666e-21	274.777	-0.492346	0.207857	-2.36867	0.0178521	0.037441	274.777	-0.62014	0.286728	-2.16282	0.0305552	0.119253	1.87976	1.2964
WBGene00001686	gpd-4	F33H1.2	67.8794	6.66911	0.135749	49.1281	0	0	67.8794	0.248015	0.190624	1.30107	0.193235	0.981054	67.8794	-2.64606	0.318858	-8.29856	1.0538e-16	9.07271e-16	67.8794	-0.151567	0.194785	-0.778129	0.436493	0.535433	67.8794	1.00874	0.406187	2.48344	0.0130119	0.0661724	-2.39805	-1.63732
WBGene00001687	gpn-1	F59D12.4	16.2724	5.02142	0.216358	23.2088	3.70709e-119	5.39698e-119	16.2724	-0.597277	0.30933	-1.93087	0.0534988	1	16.2724	0.290157	0.483874	0.599655	0.548736	0.587806	16.2724	-1.94621	0.388586	-5.00843	5.48764e-07	3.5342e-06	16.2724	0.938143	0.589497	1.59143	0.111513	0.284174	-0.307119	1.2283
WBGene00001692	grd-3	W05E7.1	69.0137	5.22377	0.194778	26.8191	1.93614e-158	3.23069e-158	69.0137	0.381233	0.27223	1.40041	0.161392	0.973531	69.0137	-0.099648	0.261207	-0.381491	0.702839	0.732011	69.0137	1.29893	0.26386	4.92279	8.53193e-07	5.27409e-06	69.0137	-0.707431	0.390978	-1.80939	0.0703912	0.21163	0.281585	-0.807079
WBGene00001694	grd-5	F41E6.2	104.329	5.745	0.121855	47.146	0	0	104.329	0.160943	0.169957	0.946963	0.343658	0.99478	104.329	0.361873	0.170714	2.11976	0.0340261	0.0463149	104.329	1.12026	0.169593	6.60555	3.96045e-11	4.87597e-10	104.329	-0.456299	0.249651	-1.82774	0.0675879	0.206051	0.522816	-0.0944258
WBGene00001708	grk-1	F19C6.1	21.6843	5.02524	0.237189	21.1867	1.26751e-99	1.72496e-99	21.6843	0.118697	0.333663	0.355737	0.722037	0.99478	21.6843	1.43043	0.476398	3.00261	0.00267679	0.00438602	21.6843	-2.30073	0.433281	-5.31002	1.09611e-07	8.15401e-07	21.6843	0.271113	0.544124	0.498256	0.618304	0.785956	1.54913	1.70155
WBGene00001713	grl-4	F42C5.7	34.0147	4.11104	0.208389	19.7277	1.24643e-86	1.6213e-86	34.0147	-0.560928	0.300499	-1.86666	0.0619494	0.900769	34.0147	2.04829	0.318674	6.42755	1.29673e-10	6.0435e-10	34.0147	-0.079895	0.325306	-0.245599	0.805992	0.857535	34.0147	0.014367	0.423542	0.0339211	0.97294	0.987273	1.48737	2.06266
WBGene00001743	grp-1	K06H7.4	37.9444	5.29838	0.141293	37.4993	9.45576e-308	2.56235e-307	37.9444	0.0153494	0.198115	0.0774769	0.938244	0.995931	37.9444	0.173818	0.251778	0.690362	0.489967	0.533754	37.9444	-0.0683725	0.218968	-0.312248	0.754852	0.818208	37.9444	-0.380582	0.349343	-1.08942	0.275969	0.502438	0.189167	-0.206764
WBGene00001744	gars-1	T10F2.1	86.6332	6.47399	0.119174	54.3238	0	0	86.6332	0.0385747	0.167557	0.230218	0.817922	0.99478	86.6332	0.644684	0.19472	3.31082	0.000930234	0.00164275	86.6332	-0.449259	0.181673	-2.4729	0.0134022	0.0290926	86.6332	-0.275791	0.264732	-1.04178	0.297516	0.522945	0.683258	0.368893
WBGene00001745	gsa-1	R06A10.2	50.9185	4.88322	0.253891	19.2335	1.941e-82	2.4828e-82	50.9185	-0.0515691	0.358208	-0.143964	0.885529	0.995157	50.9185	1.65625	0.350169	4.72987	2.2466e-06	5.99769e-06	50.9185	-0.108363	0.362962	-0.298552	0.765282	0.825758	50.9185	-0.221603	0.494051	-0.448542	0.653762	0.808573	1.60468	1.43465
WBGene00001746	gsk-3	Y18D10A.5	62.2719	6.34287	0.158439	40.0336	0	0	62.2719	-0.160492	0.223972	-0.716571	0.473639	0.99478	62.2719	0.437935	0.25814	1.6965	0.089791	0.113354	62.2719	-0.910568	0.238883	-3.81178	0.000137971	0.000519994	62.2719	0.323284	0.346849	0.932059	0.351306	0.575926	0.277443	0.761219
WBGene00001747	gsp-1	F29F11.6	100.508	6.21956	0.100995	61.5827	0	0	100.508	0.239147	0.140366	1.70374	0.0884298	0.954102	100.508	0.0642699	0.1615	0.397955	0.690663	0.721121	100.508	0.557332	0.147225	3.78559	0.000153342	0.000572091	100.508	-0.361469	0.226516	-1.59577	0.11054	0.282626	0.303417	-0.297199
WBGene00001748	gsp-2	F56C9.1	87.2855	6.42009	0.124955	51.3794	0	0	87.2855	0.156648	0.175288	0.89366	0.371504	0.99478	87.2855	-1.06532	0.201993	-5.27407	1.33434e-07	4.2541e-07	87.2855	0.654325	0.174524	3.7492	0.000177401	0.000652944	87.2855	-0.252985	0.294177	-0.859977	0.389802	0.611145	-0.908676	-1.31831
WBGene00001749	gst-1	R107.7	145.038	6.7569	0.115266	58.62	0	0	145.038	0.320458	0.161296	1.98677	0.0469483	0.853593	145.038	-0.0658765	0.166975	-0.394529	0.69319	0.72335	145.038	0.588649	0.160995	3.65632	0.000255865	0.000909565	145.038	-0.371203	0.240669	-1.54238	0.122981	0.303612	0.254581	-0.43708
WBGene00001752	gst-4	K08F4.7	133.061	6.14755	0.149914	41.0072	0	0	133.061	-0.205636	0.212105	-0.9695	0.332296	0.99478	133.061	1.87419	0.204111	9.18218	4.22457e-20	4.91448e-19	133.061	0.122003	0.21382	0.570585	0.568281	0.656372	133.061	-0.83556	0.294992	-2.83248	0.00461882	0.0315031	1.66855	1.03863
WBGene00001753	gst-5	R03D7.6	87.778	5.08055	0.178151	28.5183	6.95006e-179	1.24431e-178	87.778	-0.109261	0.25132	-0.43475	0.663744	0.99478	87.778	1.7858	0.236303	7.55726	4.11645e-14	2.84988e-13	87.778	0.720972	0.25065	2.87641	0.00402227	0.0102351	87.778	-0.838354	0.34566	-2.42537	0.0152926	0.0737907	1.67654	0.947448
WBGene00001754	gst-6	F11G11.3	39.5416	4.07683	0.1871	21.7896	2.91219e-105	4.04292e-105	39.5416	-0.0259927	0.262154	-0.0991504	0.921019	0.995166	39.5416	1.64708	0.268004	6.14574	7.95933e-10	3.38489e-09	39.5416	0.617538	0.277084	2.2287	0.0258339	0.0515491	39.5416	-0.871834	0.379064	-2.29997	0.0214501	0.0933262	1.62109	0.775246
WBGene00001755	gst-7	F11G11.2	223.413	8.00134	0.0872468	91.7092	0	0	223.413	0.31993	0.122432	2.61312	0.00897189	0.747418	223.413	-0.66797	0.137914	-4.84338	1.27646e-06	3.53684e-06	223.413	0.0343674	0.123495	0.27829	0.780789	0.838693	223.413	-0.52655	0.199749	-2.63606	0.00838742	0.0485166	-0.348041	-1.19452
WBGene00001758	gst-10	Y45G12C.2	101.029	4.96137	0.154051	32.2059	1.45693e-227	3.03935e-227	101.029	-0.0451192	0.216445	-0.208456	0.834873	0.99478	101.029	2.18994	0.206758	10.5918	3.2522e-26	5.83106e-25	101.029	0.73047	0.22166	3.29546	0.000982609	0.00297847	101.029	-0.916992	0.295254	-3.10578	0.0018978	0.0162799	2.14482	1.27295
WBGene00001761	gst-13	T26C5.1	117.707	6.12074	0.212391	28.8182	1.268e-182	2.30196e-182	117.707	0.0208648	0.299721	0.069614	0.944501	0.996435	117.707	1.24649	0.274997	4.53275	5.82219e-06	1.45545e-05	117.707	0.383052	0.290177	1.32006	0.186813	0.271118	117.707	-0.908542	0.410634	-2.21254	0.0269296	0.109009	1.26736	0.337949
WBGene00001768	gst-20	Y48E1B.10	48.7582	3.8416	0.176939	21.7114	1.60017e-104	2.21233e-104	48.7582	0.187386	0.243629	0.769146	0.441807	0.99478	48.7582	0.0861997	0.219573	0.392579	0.694631	0.724487	48.7582	2.33873	0.230631	10.1406	3.64967e-24	1.21442e-22	48.7582	-0.849751	0.35106	-2.42053	0.015498	0.0746125	0.273585	-0.763551
WBGene00001770	gst-22	F21H7.1	73.0368	3.21174	0.231584	13.8686	9.82215e-44	1.09967e-43	73.0368	0.684891	0.311962	2.19543	0.0281326	0.792078	73.0368	2.16406	0.26687	8.10907	5.10103e-16	4.2055e-15	73.0368	2.01798	0.307936	6.55325	5.6298e-11	6.84002e-10	73.0368	-1.41195	0.404002	-3.4949	0.000474236	0.00578966	2.84895	0.752115
WBGene00001772	gst-24	F37B1.1	716.001	2.66341	0.226377	11.7654	5.8862e-32	6.35971e-32	716.001	0.515912	0.300152	1.71884	0.0856441	0.954102	716.001	0.806673	0.174277	4.62869	3.67994e-06	9.49814e-06	716.001	7.09302	0.25784	27.5093	1.35754e-166	3.34271e-163	716.001	-1.37622	0.348089	-3.95363	7.69737e-05	0.00150002	1.32259	-0.569543
WBGene00001774	gst-26	Y53F4B.29	45.4474	4.8518	0.1841	26.3542	4.59475e-153	7.53083e-153	45.4474	0.0515226	0.258291	0.199475	0.841891	0.99478	45.4474	1.89717	0.278061	6.82286	8.92429e-12	4.82251e-11	45.4474	-0.219708	0.282447	-0.777873	0.436644	0.535528	45.4474	-1.17622	0.383131	-3.07003	0.00214041	0.017934	1.9487	0.720954
WBGene00001775	gst-27	Y53F4B.30	102.298	5.94715	0.120033	49.5457	0	0	102.298	-0.0013769	0.168577	-0.00816779	0.993483	0.998148	102.298	2.27859	0.193672	11.7652	5.90063e-32	1.62037e-30	102.298	-0.608784	0.195637	-3.11181	0.00185947	0.00519906	102.298	-0.600607	0.244472	-2.45675	0.0140199	0.0697688	2.27721	1.67798
WBGene00001784	gst-36	R07B1.4	40.6799	4.52891	0.163388	27.7187	4.15614e-169	7.18665e-169	40.6799	-0.166969	0.230769	-0.723533	0.469353	0.99478	40.6799	2.26701	0.269476	8.41264	4.00875e-17	3.62456e-16	40.6799	-0.337062	0.272184	-1.23836	0.215583	0.304717	40.6799	-0.848927	0.345678	-2.45583	0.014056	0.0697984	2.10004	1.41808
WBGene00001786	gst-38	F35E8.8	83.0382	3.99189	0.25443	15.6895	1.78334e-55	2.07784e-55	83.0382	-0.0618895	0.358344	-0.17271	0.86288	0.99478	83.0382	1.60348	0.303395	5.28513	1.25617e-07	4.02575e-07	83.0382	2.18606	0.336203	6.50218	7.91622e-11	9.44703e-10	83.0382	-1.9229	0.482889	-3.98207	6.83178e-05	0.00137366	1.54159	-0.319413
WBGene00001787	gst-39	Y53F4B.33	12.5174	3.34618	0.295297	11.3316	9.15585e-30	9.82771e-30	12.5174	0.354755	0.410061	0.865128	0.386969	1	12.5174	2.31685	0.548859	4.2212	2.43e-05	5.52321e-05	12.5174	-1.3044	0.536171	-2.4328	0.0149826	0.0320802	12.5174	-1.01681	0.642065	-1.58365	0.113273	1	2.6716	1.30004
WBGene00001789	gst-41	R13D7.7	12.4004	3.40364	0.342918	9.92555	3.22332e-23	3.38364e-23	12.4004	-0.737646	0.494066	-1.49301	0.135435	1	12.4004	1.07629	0.519833	2.07045	0.0384098	0.0517856	12.4004	-0.187047	0.510818	-0.366172	0.714237	0.78548	12.4004	0.238757	0.729429	0.32732	0.743426	1	0.338644	1.31505
WBGene00001790	gst-42	D1053.1	41.6117	4.28598	0.216178	19.8262	1.76991e-87	2.30629e-87	41.6117	-0.16048	0.305406	-0.525464	0.599261	0.99478	41.6117	1.47803	0.300119	4.92482	8.4438e-07	2.40271e-06	41.6117	0.561527	0.310714	1.80722	0.0707286	0.121223	41.6117	-0.520599	0.430222	-1.21007	0.226253	0.447343	1.31755	0.957432
WBGene00001791	gst-43	Y71F9AL.5	15.4576	4.4003	0.24704	17.8121	5.69357e-71	7.02378e-71	15.4576	-0.492008	0.352599	-1.39537	0.162903	1	15.4576	-0.498087	0.466036	-1.06877	0.285172	0.327718	15.4576	-0.498552	0.377543	-1.32052	0.186663	0.271006	15.4576	1.03193	0.613657	1.6816	0.0926462	0.252759	-0.990094	0.533839
WBGene00001793	gsy-1	Y46G5A.31	45.4634	5.70018	0.126803	44.9529	0	0	45.4634	0.278593	0.176297	1.58025	0.114049	0.955072	45.4634	0.254205	0.238786	1.06457	0.287071	0.329745	45.4634	-0.434407	0.203874	-2.13076	0.0331088	0.063841	45.4634	-0.664703	0.325046	-2.04495	0.0408599	0.147058	0.532798	-0.410498
WBGene00001794	gta-1	K04D7.3	251.162	7.13291	0.132451	53.8531	0	0	251.162	0.0965388	0.186628	0.517279	0.604961	0.99478	251.162	2.18276	0.1786	12.2215	2.38578e-34	7.49948e-33	251.162	-0.282092	0.188048	-1.5001	0.133588	0.205201	251.162	-1.05418	0.256028	-4.11745	3.83085e-05	0.000876685	2.2793	1.12857
WBGene00001795	gtl-1	C05C12.3	48.2255	5.41424	0.164643	32.8846	3.64337e-237	7.86946e-237	48.2255	-0.356097	0.234111	-1.52106	0.128245	0.965307	48.2255	1.36901	0.258505	5.29586	1.18457e-07	3.8161e-07	48.2255	-0.446772	0.253588	-1.7618	0.0781026	0.131873	48.2255	-0.415534	0.355897	-1.16757	0.242981	0.464425	1.01291	0.953475
WBGene00001808	gut-2	T10G3.6	47.0191	5.48665	0.158512	34.6135	1.58218e-262	3.73763e-262	47.0191	0.402263	0.220758	1.82219	0.068426	0.914441	47.0191	-0.954099	0.272189	-3.50528	0.000456124	0.000849998	47.0191	0.45177	0.226372	1.9957	0.0459663	0.0846555	47.0191	-0.00913937	0.375577	-0.0243342	0.980586	0.991128	-0.551836	-0.963238
WBGene00001812	haf-2	F43E2.4	119.143	6.69388	0.125547	53.3175	0	0	119.143	0.0288487	0.176786	0.163184	0.870373	0.99478	119.143	-0.956279	0.192003	-4.98054	6.34073e-07	1.83251e-06	119.143	0.677386	0.173616	3.90164	9.55413e-05	0.00037441	119.143	0.529219	0.271596	1.94855	0.0513489	0.171007	-0.92743	-0.42706
WBGene00001813	haf-3	F57A10.3	38.1219	5.53726	0.227062	24.3866	2.37527e-131	3.61031e-131	38.1219	0.0700822	0.320008	0.219001	0.826649	0.99478	38.1219	-0.413381	0.352751	-1.17188	0.241246	0.281396	38.1219	-0.286	0.323019	-0.885397	0.375942	0.475773	38.1219	0.202297	0.494572	0.409034	0.682515	0.826358	-0.343299	-0.211084
WBGene00001814	haf-4	W04C9.1	64.9892	4.40932	0.205386	21.4684	3.07174e-102	4.20749e-102	64.9892	0.0561012	0.287896	0.194866	0.845498	0.99478	64.9892	1.76377	0.273438	6.45033	1.11608e-10	5.25794e-10	64.9892	0.809106	0.290178	2.78831	0.00529833	0.0130245	64.9892	-0.486004	0.391367	-1.24181	0.214306	0.433907	1.81987	1.27776
WBGene00001815	hmt-1	W09D6.6	48.7448	5.57825	0.144617	38.5726	0	0	48.7448	-0.150973	0.204262	-0.739113	0.459839	0.99478	48.7448	0.185738	0.234805	0.79103	0.428926	0.473897	48.7448	0.109377	0.214294	0.510408	0.609766	0.695007	48.7448	-0.348	0.336489	-1.03421	0.301037	0.526087	0.0347651	-0.162262
WBGene00001816	haf-6	Y48G8AL.11	30.6255	5.22913	0.150091	34.8398	6.07233e-266	1.45072e-265	30.6255	0.0883875	0.21003	0.420833	0.673877	0.99478	30.6255	0.574639	0.295469	1.94484	0.0517947	0.0682375	30.6255	-0.815778	0.254182	-3.20943	0.00133	0.00387868	30.6255	-0.332207	0.382925	-0.867553	0.385639	0.608175	0.663027	0.242432
WBGene00001817	haf-7	Y50E8A.16	24.8626	3.1948	0.218879	14.5962	2.9706e-48	3.37494e-48	24.8626	0.252211	0.299941	0.840869	0.400421	0.99478	24.8626	1.55745	0.319084	4.88099	1.05555e-06	2.95914e-06	24.8626	0.755827	0.328119	2.30352	0.0212499	0.0435914	24.8626	-0.700296	0.432854	-1.61786	0.105693	0.274573	1.80966	0.857151
WBGene00001819	haf-9	ZK484.2	49.2592	5.1152	0.158917	32.1878	2.61558e-227	5.4503e-227	49.2592	-0.346764	0.226253	-1.53263	0.125366	0.965307	49.2592	1.90184	0.242603	7.83931	4.53011e-15	3.43572e-14	49.2592	-0.174392	0.245943	-0.709078	0.478276	0.57337	49.2592	-1.64624	0.361647	-4.55205	5.3126e-06	0.00018857	1.55507	0.255602
WBGene00001823	hap-1	ZC395.7	14.3699	3.83759	0.279346	13.7377	6.03267e-43	6.73671e-43	14.3699	0.0913363	0.391893	0.233064	0.815712	1	14.3699	-0.0433203	0.472294	-0.0917232	0.926918	0.937451	14.3699	-0.0918282	0.417094	-0.220162	0.825745	0.87277	14.3699	0.131285	0.638625	0.205574	0.837123	1	0.048016	0.0879645
WBGene00001824	hbl-1	F13D11.2	15.4459	4.73598	0.333707	14.192	1.02658e-45	1.15582e-45	15.4459	-0.772867	0.475988	-1.62371	0.104438	1	15.4459	0.647461	0.522298	1.23964	0.215109	0.25331	15.4459	-1.24578	0.497243	-2.50537	0.0122323	0.026933	15.4459	-0.0296372	0.748827	-0.0395782	0.968429	0.985391	-0.125406	0.617824
WBGene00001827	hcf-1	C46A5.9	85.3313	6.52283	0.156042	41.8017	0	0	85.3313	0.149322	0.219638	0.679854	0.496597	0.99478	85.3313	-1.40214	0.244196	-5.74188	9.36295e-09	3.49667e-08	85.3313	0.487321	0.214855	2.26814	0.0233205	0.0472225	85.3313	0.259756	0.348392	0.745586	0.455918	0.663195	-1.25282	-1.14239
WBGene00001829	hcp-1	ZK1055.1	134.797	7.48428	0.0898961	83.2548	0	0	134.797	0.169772	0.126154	1.34576	0.17838	0.981054	134.797	-2.32014	0.199356	-11.6382	2.63603e-31	6.90509e-30	134.797	0.134661	0.128958	1.04422	0.296384	0.394626	134.797	0.930148	0.257848	3.60735	0.00030934	0.00422212	-2.15037	-1.38999
WBGene00001830	hcp-2	T06E4.1	78.7784	6.84934	0.125567	54.5475	0	0	78.7784	-0.0119755	0.177015	-0.0676523	0.946062	0.996519	78.7784	-2.27365	0.270055	-8.41921	3.79029e-17	3.43545e-16	78.7784	-0.0941669	0.179915	-0.523397	0.600698	0.68634	78.7784	1.33405	0.345909	3.85665	0.000114953	0.00205586	-2.28562	-0.939598
WBGene00001831	hcp-3	F58A4.3	55.9327	6.08961	0.151084	40.3062	0	0	55.9327	0.125576	0.212305	0.591486	0.554195	0.99478	55.9327	-2.42526	0.309931	-7.82516	5.07018e-15	3.81788e-14	55.9327	0.449443	0.211751	2.1225	0.0337956	0.0649619	55.9327	0.886838	0.41025	2.1617	0.030641	0.119422	-2.29969	-1.53842
WBGene00001832	hcp-4	T03F1.9	108.44	7.29379	0.0939315	77.6501	0	0	108.44	0.0707428	0.132043	0.535757	0.592126	0.99478	108.44	-2.04611	0.217049	-9.42694	4.22243e-21	5.18986e-20	108.44	-0.206334	0.138723	-1.48738	0.136915	0.209354	108.44	1.10638	0.275343	4.0182	5.86439e-05	0.00122857	-1.97536	-0.939723
WBGene00001833	hcp-6	Y110A7A.1	86.9596	7.48047	0.209706	35.6711	1.10783e-278	2.7554e-278	86.9596	0.0924988	0.296235	0.312248	0.754852	0.99478	86.9596	-0.658674	0.349078	-1.8869	0.059174	0.0772878	86.9596	-2.16385	0.304486	-7.10656	1.18974e-12	1.76478e-11	86.9596	0.836918	0.4673	1.79096	0.073299	0.216628	-0.566175	0.178244
WBGene00001834	hda-1	C53A5.3	91.5744	6.54562	0.111203	58.8619	0	0	91.5744	0.191602	0.155663	1.23088	0.218369	0.993234	91.5744	-2.45446	0.23294	-10.5369	5.84073e-26	1.02972e-24	91.5744	0.784082	0.15529	5.04913	4.43819e-07	2.92461e-06	91.5744	1.09333	0.301912	3.62135	0.000293075	0.00406159	-2.26286	-1.36113
WBGene00001835	hda-2	C08B11.2	35.0172	5.81988	0.252419	23.0564	1.26747e-117	1.83441e-117	35.0172	-0.23166	0.357143	-0.648647	0.516566	0.99478	35.0172	-0.582669	0.398046	-1.46382	0.143242	0.174006	35.0172	-0.798407	0.359532	-2.22069	0.0263721	0.0524955	35.0172	0.307652	0.564369	0.545125	0.585667	0.761017	-0.814329	-0.275017
WBGene00001836	hda-3	R06C1.1	44.3944	5.40612	0.164284	32.9072	1.73256e-237	3.74881e-237	44.3944	0.039023	0.230836	0.169051	0.865757	0.99478	44.3944	-1.97021	0.304993	-6.45987	1.04792e-10	4.95582e-10	44.3944	0.886713	0.228205	3.8856	0.000102078	0.000396662	44.3944	0.877298	0.41192	2.12978	0.0331901	0.12694	-1.93119	-1.09292
WBGene00001837	hda-4	C10E2.3	27.5928	5.68568	0.197628	28.7696	5.1462e-182	9.32654e-182	27.5928	-0.503053	0.281225	-1.78879	0.073648	0.923859	27.5928	0.842384	0.380734	2.21253	0.0269304	0.0372189	27.5928	-1.97991	0.337018	-5.87478	4.23395e-09	4.04085e-08	27.5928	0.347231	0.482656	0.719418	0.471883	0.676451	0.339331	1.18962
WBGene00001838	hda-10	Y51H1A.5	38.4603	5.35595	0.234359	22.8536	1.34448e-115	1.93336e-115	38.4603	-0.151336	0.331261	-0.456848	0.64778	0.99478	38.4603	-1.59378	0.377933	-4.21709	2.47475e-05	5.61628e-05	38.4603	0.446576	0.323139	1.38199	0.166973	0.247156	38.4603	1.29024	0.520078	2.48085	0.013107	0.0663834	-1.74511	-0.30354
WBGene00001840	hel-1	C26D10.2	257.673	8.04134	0.113401	70.9109	0	0	257.673	0.28678	0.1597	1.79574	0.0725359	0.922535	257.673	-1.05126	0.163201	-6.44152	1.18286e-10	5.54782e-10	257.673	0.33957	0.154778	2.19392	0.0282414	0.0557805	257.673	0.228006	0.235457	0.968356	0.332867	0.558889	-0.764483	-0.823257
WBGene00001843	hgo-1	W06D4.1	115.078	5.77493	0.117592	49.1097	0	0	115.078	-0.0539908	0.165308	-0.326608	0.743965	0.99478	115.078	1.84569	0.171181	10.782	4.18498e-27	8.05063e-26	115.078	0.263244	0.176433	1.49204	0.135689	0.207824	115.078	-0.758647	0.236474	-3.20816	0.00133589	0.0126791	1.79169	1.08704
WBGene00001844	hid-1	K02E10.2	33.4615	6.11479	0.199245	30.6898	7.78414e-207	1.52443e-206	33.4615	-0.680756	0.283905	-2.39783	0.0164924	0.759094	33.4615	1.96815	0.387147	5.08374	3.70082e-07	1.10949e-06	33.4615	-2.88776	0.365649	-7.89764	2.84241e-15	5.38382e-14	33.4615	-0.345317	0.480226	-0.719072	0.472097	0.676494	1.2874	1.62284
WBGene00001851	hif-1	F38A6.3	127.237	5.88652	0.135435	43.4637	0	0	127.237	0.100871	0.189909	0.531155	0.595312	0.99478	127.237	1.59088	0.185646	8.5694	1.04024e-17	9.88967e-17	127.237	0.483943	0.193461	2.5015	0.012367	0.0271889	127.237	-0.83653	0.266048	-3.14429	0.00166492	0.0149264	1.69175	0.754347
WBGene00001853	hil-2	Y73B6BL.9	69.9363	7.03733	0.147328	47.7665	0	0	69.9363	0.252514	0.207379	1.21765	0.223358	0.993234	69.9363	0.828858	0.30258	2.7393	0.00615705	0.00947545	69.9363	-2.74032	0.261981	-10.46	1.3182e-25	4.75001e-24	69.9363	0.12634	0.359514	0.351419	0.725274	0.852464	1.08137	0.955198
WBGene00001855	hil-4	C18G1.5	326.456	8.0562	0.191605	42.0459	0	0	326.456	0.404604	0.270497	1.49578	0.134711	0.968704	326.456	-2.35067	0.252463	-9.31094	1.26701e-20	1.51692e-19	326.456	1.20905	0.254548	4.74979	2.03628e-06	1.16244e-05	326.456	0.757848	0.374693	2.02259	0.0431157	0.152417	-1.94606	-1.59282
WBGene00001856	hil-5	B0414.3	228.078	8.24471	0.181658	45.386	0	0	228.078	0.330734	0.25651	1.28936	0.197273	0.981054	228.078	-0.998588	0.248978	-4.01075	6.05265e-05	0.000129898	228.078	-0.561381	0.246108	-2.28104	0.0225463	0.0458309	228.078	0.663462	0.361271	1.83647	0.0662886	0.203787	-0.667854	-0.335126
WBGene00001860	him-1	F28B3.7	114.204	7.566	0.136294	55.5124	0	0	114.204	-0.0424987	0.192488	-0.220786	0.825259	0.99478	114.204	-1.3379	0.229606	-5.82693	5.64572e-09	2.15529e-08	114.204	-0.614154	0.192583	-3.18903	0.00142751	0.00412075	114.204	0.379452	0.322317	1.17726	0.239091	0.460126	-1.3804	-0.958445
WBGene00001862	him-3	ZK381.1	60.2855	5.74477	0.12836	44.7551	0	0	60.2855	0.0923382	0.179682	0.513898	0.607323	0.99478	60.2855	-1.63002	0.237451	-6.86464	6.66615e-12	3.67758e-11	60.2855	0.935228	0.179948	5.19721	2.02299e-07	1.43415e-06	60.2855	0.609637	0.323273	1.88583	0.0593185	0.188956	-1.53768	-1.02038
WBGene00001863	him-4	F15G9.4	137.71	6.81534	0.180464	37.7657	0	0	137.71	-0.0488367	0.254897	-0.191594	0.84806	0.99478	137.71	1.89913	0.245036	7.75042	9.15925e-15	6.7457e-14	137.71	-0.723391	0.25574	-2.82862	0.00467485	0.0116943	137.71	-0.916946	0.353143	-2.59653	0.00941707	0.0522861	1.8503	0.982187
WBGene00001864	him-5	D1086.4	20.2537	4.72566	0.304854	15.5014	3.39439e-54	3.93755e-54	20.2537	0.157538	0.429241	0.367015	0.713608	0.99478	20.2537	-1.34192	0.527699	-2.54297	0.0109915	0.0162648	20.2537	-0.282346	0.432861	-0.652278	0.514222	0.60738	20.2537	0.904913	0.707043	1.27986	0.200596	0.415492	-1.18438	-0.43701
WBGene00001865	him-6	T04A11.6	28.3301	5.57747	0.280799	19.8628	8.53696e-88	1.11497e-87	28.3301	0.016836	0.396412	0.0424709	0.966123	0.998148	28.3301	-0.579317	0.472088	-1.22714	0.219771	0.258264	28.3301	-1.26623	0.409832	-3.08963	0.00200408	0.0055463	28.3301	0.759053	0.632667	1.19977	0.23023	0.450789	-0.562481	0.179736
WBGene00001867	him-8	T07G12.12	33.6244	5.35966	0.173339	30.9201	6.41183e-210	1.26846e-209	33.6244	0.0762198	0.243454	0.313076	0.754223	0.99478	33.6244	-2.27457	0.429054	-5.30135	1.14951e-07	3.70642e-07	33.6244	-0.105635	0.256597	-0.411677	0.680576	0.756151	33.6244	2.25653	0.50666	4.45375	8.4385e-06	0.000270538	-2.19835	-0.0180326
WBGene00001869	him-10	R12B2.4	55.6719	6.4841	0.12296	52.7334	0	0	55.6719	0.0688308	0.172832	0.398252	0.690445	0.99478	55.6719	-2.17435	0.337496	-6.44262	1.17432e-10	5.51474e-10	55.6719	-0.691663	0.190538	-3.63004	0.000283373	0.000993488	55.6719	1.83186	0.397868	4.60418	4.14096e-06	0.000158289	-2.10552	-0.342498
WBGene00001874	him-17	T09E8.2	81.7071	6.68407	0.129929	51.4441	0	0	81.7071	0.0435129	0.182956	0.237832	0.812011	0.99478	81.7071	-0.970293	0.221741	-4.3758	1.2099e-05	2.88773e-05	81.7071	-0.0416436	0.186149	-0.223711	0.822982	0.870471	81.7071	0.236016	0.309018	0.763762	0.445009	0.654392	-0.92678	-0.734277
WBGene00001898	his-24	M163.3	59.4784	7.1255	0.293039	24.3159	1.33039e-130	2.01551e-130	59.4784	-0.00362691	0.414213	-0.00875615	0.993014	0.998148	59.4784	0.337521	0.466144	0.724069	0.469024	0.513818	59.4784	-3.09657	0.435233	-7.11475	1.12113e-12	1.66636e-11	59.4784	-0.0958425	0.641649	-0.149369	0.881262	0.943512	0.333894	0.241678
WBGene00001909	his-35	C50F4.13	80.8518	4.55371	0.144976	31.4101	1.47167e-216	2.97028e-216	80.8518	-0.240613	0.205753	-1.16943	0.242232	0.993234	80.8518	1.05071	0.184519	5.69429	1.23884e-08	4.53933e-08	80.8518	1.65936	0.197521	8.40097	4.42801e-17	9.64887e-16	80.8518	-0.327016	0.281657	-1.16104	0.245624	0.466996	0.810092	0.72369
WBGene00001910	C50F4.6	C50F4.6	60.9724	6.92923	0.155089	44.679	0	0	60.9724	0.173817	0.21849	0.795538	0.426301	0.99478	60.9724	-0.747312	0.34387	-2.17324	0.0297621	0.0408572	60.9724	-2.13016	0.252412	-8.43921	3.19497e-17	7.08746e-16	60.9724	0.996894	0.418681	2.38103	0.0172642	0.0797522	-0.573494	0.249582
WBGene00001911	his-37	C50F4.7	177.11	6.5645	0.0807001	81.3445	0	0	177.11	0.109757	0.112358	0.976856	0.32864	0.99478	177.11	1.53101	0.123399	12.407	2.39579e-35	8.15563e-34	177.11	0.269331	0.123765	2.17616	0.0295435	0.0579286	177.11	-0.800004	0.16795	-4.76335	1.90402e-06	8.77237e-05	1.64077	0.731006
WBGene00001912	his-38	K03A1.6	12.2834	3.32501	0.297936	11.1601	6.38841e-29	6.83435e-29	12.2834	-0.695433	0.431338	-1.61227	0.106903	1	12.2834	1.03338	0.497947	2.07529	0.0379597	0.051263	12.2834	-0.354427	0.469956	-0.754171	0.450747	0.548816	12.2834	1.05564	0.641951	1.64443	0.100087	1	0.337952	2.08903
WBGene00001915	his-41	C50F4.5	215.637	5.42068	0.141599	38.2818	0	0	215.637	0.104495	0.198073	0.527559	0.597805	0.99478	215.637	1.83518	0.174389	10.5235	6.73577e-26	1.17908e-24	215.637	1.58658	0.191557	8.28255	1.20565e-16	2.5666e-15	215.637	-0.63468	0.261464	-2.42741	0.0152071	0.0735202	1.93967	1.2005
WBGene00001935	his-61	F55G1.10	17.7905	4.60296	0.221748	20.7576	1.04627e-95	1.40447e-95	17.7905	0.487254	0.308586	1.57899	0.114339	1	17.7905	-0.613016	0.443594	-1.38193	0.166993	0.200126	17.7905	-0.577556	0.344929	-1.67442	0.0940477	0.153464	17.7905	-0.80147	0.625749	-1.28082	0.200257	0.415134	-0.125763	-1.41449
WBGene00001936	his-62	F55G1.3	23.7573	4.75179	0.258971	18.3487	3.37972e-75	4.22794e-75	23.7573	0.0982277	0.364398	0.269562	0.787497	0.99478	23.7573	-2.00015	0.445873	-4.48593	7.25981e-06	1.79359e-05	23.7573	0.698492	0.356409	1.95981	0.0500185	0.0910289	23.7573	0.0561929	0.644071	0.0872465	0.930476	0.967714	-1.90193	-1.94396
WBGene00001942	his-68	T23D8.6	38.8675	5.35159	0.153709	34.8163	1.37966e-265	3.29185e-265	38.8675	0.344048	0.213827	1.609	0.107616	0.954102	38.8675	-2.31715	0.357592	-6.47986	9.18077e-11	4.3782e-10	38.8675	0.493152	0.221208	2.22936	0.0257897	0.0514749	38.8675	1.30932	0.441916	2.96283	0.00304826	0.0234328	-1.9731	-1.00783
WBGene00001945	his-71	F45E1.6	15.7813	3.52006	0.273127	12.888	5.2595e-38	5.79188e-38	15.7813	-0.0435523	0.384078	-0.113394	0.909718	1	15.7813	1.73701	0.442157	3.92848	8.54831e-05	0.00017843	15.7813	-0.424254	0.437018	-0.970794	0.331651	0.430563	15.7813	-0.704343	0.583305	-1.2075	0.227238	0.448608	1.69345	1.03266
WBGene00001946	his-72	Y49E10.6	162.631	7.56904	0.133073	56.8788	0	0	162.631	0.112612	0.187664	0.600076	0.548456	0.99478	162.631	-1.26855	0.201064	-6.30919	2.80506e-10	1.2604e-09	162.631	0.111903	0.182959	0.611631	0.540782	0.632335	162.631	0.715639	0.283632	2.52313	0.0116317	0.0610269	-1.15594	-0.55291
WBGene00001955	hlh-11	F58A4.7	84.3171	4.90713	0.176823	27.7517	1.66312e-169	2.87986e-169	84.3171	-0.0829979	0.24912	-0.333164	0.73901	0.99478	84.3171	1.77345	0.234295	7.56931	3.75216e-14	2.60991e-13	84.3171	0.820051	0.249006	3.2933	0.000990202	0.00299902	84.3171	-0.777608	0.341824	-2.27488	0.0229133	0.0977963	1.69045	0.99584
WBGene00001971	hmg-1.1	Y48B6A.14	300.99	8.53827	0.115067	74.2029	0	0	300.99	0.245308	0.162295	1.5115	0.130662	0.965307	300.99	-0.698901	0.162618	-4.29781	1.72494e-05	4.02596e-05	300.99	-0.215105	0.157717	-1.36387	0.172609	0.254149	300.99	-0.0463161	0.23682	-0.195575	0.844943	0.92107	-0.453593	-0.745217
WBGene00001972	hmg-1.2	F47D12.4	65.6274	6.27837	0.155652	40.336	0	0	65.6274	-0.0981302	0.219777	-0.4465	0.655236	0.99478	65.6274	0.284194	0.249297	1.13998	0.254294	0.295585	65.6274	-0.619287	0.230909	-2.68195	0.00731946	0.0171811	65.6274	0.250226	0.339558	0.736917	0.461173	0.66687	0.186064	0.534421
WBGene00001973	hmg-3	C32F10.5	137.299	7.85796	0.129893	60.4955	0	0	137.299	0.116275	0.183247	0.634522	0.52574	0.99478	137.299	-1.30003	0.222839	-5.83394	5.41333e-09	2.07515e-08	137.299	-0.893199	0.184914	-4.83033	1.36304e-06	8.02931e-06	137.299	0.538584	0.305056	1.76553	0.077475	0.224726	-1.18376	-0.761447
WBGene00001974	hmg-4	T20B12.8	166.148	8.39899	0.150227	55.9086	0	0	166.148	-0.0806993	0.212356	-0.38002	0.703931	0.99478	166.148	-1.69736	0.249407	-6.80556	1.0066e-11	5.37266e-11	166.148	-1.2953	0.209605	-6.17969	6.42281e-10	6.74897e-09	166.148	0.901232	0.344425	2.61663	0.00888025	0.0502034	-1.77805	-0.796123
WBGene00001975	hmg-5	F45E4.9	50.2096	5.86263	0.139438	42.0448	0	0	50.2096	0.0604278	0.195798	0.308624	0.757608	0.99478	50.2096	-1.48731	0.278182	-5.34655	8.96448e-08	2.94413e-07	50.2096	0.179789	0.203146	0.885023	0.376144	0.475865	50.2096	1.00809	0.360837	2.79376	0.0052099	0.0340331	-1.42689	-0.479222
WBGene00001976	hmg-11	T05A7.4	25.8742	5.78325	0.214961	26.9037	1.98919e-159	3.33428e-159	25.8742	-0.0511979	0.303464	-0.168711	0.866024	0.99478	25.8742	0.33926	0.457235	0.741982	0.458098	0.502744	25.8742	-2.475	0.375993	-6.58256	4.62403e-11	5.68348e-10	25.8742	0.037976	0.577944	0.0657087	0.94761	0.974504	0.288062	0.377236
WBGene00001977	hmg-12	Y17G7A.1	301.124	7.71667	0.132859	58.0815	0	0	301.124	0.0187221	0.187553	0.0998227	0.920485	0.995166	301.124	-2.42665	0.187928	-12.9127	3.81915e-38	1.41769e-36	301.124	1.53717	0.176886	8.69019	3.61831e-18	8.43168e-17	301.124	1.46586	0.270669	5.41569	6.10524e-08	5.5887e-06	-2.40793	-0.960789
WBGene00001978	hmp-1	R13H4.4	100.42	6.98921	0.107905	64.7716	0	0	100.42	-0.120004	0.152368	-0.787592	0.430935	0.99478	100.42	-1.37639	0.207427	-6.63553	3.23348e-11	1.62709e-10	100.42	-0.0983871	0.157101	-0.626268	0.531139	0.623178	100.42	1.31289	0.268841	4.88353	1.04202e-06	5.45062e-05	-1.49639	-0.0634945
WBGene00001979	hmp-2	K05C4.6	67.1148	6.21831	0.116019	53.5974	0	0	67.1148	0.0266776	0.162928	0.163738	0.869937	0.99478	67.1148	-1.42283	0.222171	-6.4042	1.51157e-10	6.99185e-10	67.1148	0.457427	0.166965	2.73967	0.00615018	0.0148566	67.1148	0.280762	0.30793	0.911773	0.361888	0.585094	-1.39615	-1.14207
WBGene00001980	hmr-1	W02B9.1	69.629	6.73141	0.150622	44.6908	0	0	69.629	-0.0496666	0.212609	-0.233605	0.815292	0.99478	69.629	-1.14531	0.266885	-4.29141	1.77541e-05	4.13459e-05	69.629	-0.535306	0.217385	-2.46247	0.0137982	0.0298645	69.629	0.602383	0.363627	1.6566	0.097601	0.260957	-1.19498	-0.542928
WBGene00001983	hoe-1	E04A4.4	103.396	6.23038	0.127952	48.6933	0	0	103.396	0.0938953	0.179627	0.522724	0.601166	0.99478	103.396	-0.0414981	0.187498	-0.221326	0.824839	0.844619	103.396	0.651688	0.179491	3.63076	0.000282589	0.000991207	103.396	-0.0536159	0.268564	-0.199639	0.841763	0.918611	0.0523972	-0.095114
WBGene00001985	hop-1	C18E3.8	26.9326	4.58575	0.177428	25.8458	2.71473e-147	4.36424e-147	26.9326	0.324551	0.245836	1.32019	0.18677	0.981054	26.9326	-3.43408	0.506692	-6.77746	1.22311e-11	6.48142e-11	26.9326	1.12856	0.247368	4.56227	5.06038e-06	2.68157e-05	26.9326	1.86211	0.5989	3.10922	0.00187583	0.0161871	-3.10953	-1.57197
WBGene00001993	hpd-1	T21C12.2	158.27	7.0659	0.105928	66.7049	0	0	158.27	-0.0977965	0.149505	-0.654135	0.513025	0.99478	158.27	2.31557	0.168186	13.7679	3.97481e-43	1.72717e-41	158.27	-1.12163	0.169765	-6.60697	3.92277e-11	4.83764e-10	158.27	-0.925185	0.219894	-4.20742	2.58306e-05	0.000637247	2.21777	1.39038
WBGene00001994	hpk-1	F20B6.8	136.191	7.10533	0.117047	60.7052	0	0	136.191	-0.126503	0.165351	-0.765056	0.444238	0.99478	136.191	1.24893	0.177694	7.02851	2.08751e-12	1.21421e-11	136.191	-0.744889	0.175403	-4.24672	2.16921e-05	9.97756e-05	136.191	-0.389129	0.244771	-1.58977	0.111887	0.284815	1.12242	0.859798
WBGene00001996	hpl-2	K01G5.2	48.9755	5.83211	0.14917	39.0971	0	0	48.9755	0.0295715	0.209781	0.140963	0.887899	0.995157	48.9755	-1.41524	0.281334	-5.03047	4.89276e-07	1.44225e-06	48.9755	0.219921	0.214763	1.02402	0.305827	0.404648	48.9755	0.687168	0.37768	1.81944	0.0688439	0.20851	-1.38567	-0.728072
WBGene00001999	hrp-1	F42A6.7	217.489	7.88521	0.139969	56.3355	0	0	217.489	0.304008	0.19732	1.54068	0.123394	0.965307	217.489	-0.928173	0.19492	-4.76182	1.91858e-06	5.17057e-06	217.489	0.188841	0.190164	0.99304	0.320691	0.419951	217.489	-0.0198139	0.285533	-0.0693927	0.944677	0.973071	-0.624165	-0.947987
WBGene00002000	hrp-2	F58D5.1	75.6477	6.84502	0.120813	56.6581	0	0	75.6477	0.269427	0.16945	1.59001	0.111832	0.955072	75.6477	0.157857	0.231489	0.681919	0.49529	0.538362	75.6477	-1.34188	0.195487	-6.8643	6.68161e-12	9.20841e-11	75.6477	-0.170053	0.300676	-0.56557	0.571686	0.751788	0.427284	-0.0121963
WBGene00002001	hars-1	T11G6.1	56.0596	5.74108	0.115614	49.6574	0	0	56.0596	0.267742	0.160329	1.66995	0.094929	0.954102	56.0596	0.233713	0.206499	1.13179	0.257724	0.29917	56.0596	-0.00650691	0.180005	-0.0361486	0.971164	0.980764	56.0596	-0.635362	0.284693	-2.23175	0.0256318	0.104956	0.501455	-0.401649
WBGene00002002	hsb-1	K08E7.2	29.8195	4.8048	0.187715	25.5963	1.67834e-144	2.67369e-144	29.8195	0.0634229	0.26328	0.240895	0.809637	0.99478	29.8195	-0.506704	0.310973	-1.62941	0.103225	0.128675	29.8195	0.467072	0.270284	1.72808	0.0839747	0.140154	29.8195	-0.156865	0.442948	-0.354138	0.723235	0.851074	-0.443281	-0.663569
WBGene00002003	hse-5	B0285.5	43.8258	6.03341	0.153075	39.4149	0	0	43.8258	0.0473583	0.215409	0.219853	0.825986	0.99478	43.8258	-1.26911	0.299661	-4.23514	2.28407e-05	5.21707e-05	43.8258	-0.314355	0.225895	-1.3916	0.164045	0.243725	43.8258	-0.0105856	0.420711	-0.0251611	0.979926	0.990643	-1.22175	-1.27969
WBGene00002004	hsf-1	Y53C10A.12	33.6685	5.5687	0.168173	33.1129	1.94095e-240	4.23319e-240	33.6685	0.129924	0.236057	0.550393	0.58205	0.99478	33.6685	-0.457839	0.315493	-1.45118	0.146729	0.177832	33.6685	-0.553581	0.257188	-2.15243	0.0313632	0.0608564	33.6685	-0.223478	0.435313	-0.513373	0.607691	0.778583	-0.327915	-0.681316
WBGene00002005	hsp-1	F26D10.3	1268.4	10.3523	0.0880916	117.517	0	0	1268.4	0.243257	0.12442	1.95513	0.0505682	0.864646	1268.4	-0.112108	0.113613	-0.986758	0.323761	0.366476	1268.4	-0.105222	0.118439	-0.888406	0.374323	0.474332	1268.4	-0.1113	0.169805	-0.655456	0.512174	0.709279	0.131149	-0.223408
WBGene00002007	hsp-3	C15H9.6	349.268	8.7085	0.088454	98.4523	0	0	349.268	0.0164354	0.12484	0.131652	0.89526	0.995157	349.268	1.95911	0.135603	14.4474	2.60266e-47	1.44555e-45	349.268	-1.75341	0.136157	-12.8778	6.00006e-38	4.5227e-36	349.268	-0.547598	0.18007	-3.04102	0.00235775	0.0192296	1.97555	1.41151
WBGene00002008	hsp-4	F43E2.8	135.524	7.44915	0.124359	59.9006	0	0	135.524	0.180392	0.175128	1.03005	0.302985	0.99478	135.524	-0.830461	0.201956	-4.1121	3.92085e-05	8.6561e-05	135.524	-0.432919	0.176963	-2.44638	0.01443	0.0311043	135.524	0.628928	0.275447	2.2833	0.0224126	0.0961902	-0.650069	-0.201533
WBGene00002010	hsp-6	C37H5.8	127.69	7.34139	0.123714	59.3416	0	0	127.69	0.0967156	0.174322	0.554811	0.579024	0.99478	127.69	-0.594459	0.193241	-3.07626	0.00209612	0.00349685	127.69	-0.242734	0.175185	-1.38558	0.165874	0.24585	127.69	0.0371681	0.273948	0.135676	0.892078	0.947654	-0.497743	-0.557291
WBGene00002021	hsp-17	F52E1.7	47.7741	4.49022	0.246391	18.224	3.33161e-74	4.15299e-74	47.7741	-0.118497	0.347857	-0.34065	0.733367	0.99478	47.7741	0.73337	0.32925	2.22739	0.0259211	0.0359518	47.7741	0.89948	0.339634	2.64838	0.00808778	0.0187699	47.7741	0.13621	0.480569	0.283435	0.776843	0.881647	0.614872	0.86958
WBGene00002023	hsp-25	C09B8.6	72.4909	5.00322	0.174561	28.6617	1.1449e-180	2.06681e-180	72.4909	0.119379	0.244402	0.488455	0.625228	0.99478	72.4909	1.41046	0.235067	6.00024	1.97024e-09	8.0144e-09	72.4909	0.779951	0.245927	3.17147	0.00151667	0.00434419	72.4909	-1.07012	0.345176	-3.10021	0.00193381	0.0164872	1.52984	0.340342
WBGene00002024	hsp-43	C14F11.5	104.74	4.24077	0.156063	27.1734	1.33824e-162	2.27047e-162	104.74	0.0416502	0.217058	0.191886	0.847832	0.99478	104.74	1.39868	0.186884	7.48423	7.19694e-14	4.86848e-13	104.74	1.92968	0.208738	9.24454	2.36256e-20	6.21075e-19	104.74	-0.0915638	0.28232	-0.324326	0.745691	0.864171	1.44033	1.30712
WBGene00002025	hsp-60	Y22D7AL.5	126.78	7.56967	0.146908	51.5265	0	0	126.78	0.164928	0.207205	0.795963	0.426054	0.99478	126.78	0.30604	0.222487	1.37554	0.168965	0.202292	126.78	-1.24311	0.212606	-5.84705	5.0038e-09	4.72674e-08	126.78	-0.315294	0.312751	-1.00813	0.313392	0.539004	0.470967	-0.00925427
WBGene00002027	hsr-9	T05F1.6	174.07	7.84472	0.156436	50.1465	0	0	174.07	0.210731	0.220754	0.954594	0.339783	0.99478	174.07	-1.83069	0.231503	-7.90782	2.61933e-15	2.02608e-14	174.07	0.0642203	0.212126	0.302746	0.762083	0.823268	174.07	0.440515	0.333199	1.32208	0.186142	0.396143	-1.61996	-1.39017
WBGene00002028	hst-1	F08B4.6	26.6186	5.1294	0.2231	22.9915	5.67299e-117	8.19445e-117	26.6186	0.0394558	0.31418	0.125583	0.900062	0.995157	26.6186	-0.497673	0.384908	-1.29297	0.196023	0.232092	26.6186	-0.44866	0.328885	-1.36419	0.172508	0.254051	26.6186	0.233526	0.525649	0.444262	0.656853	0.809948	-0.458217	-0.264147
WBGene00002029	hst-2	C34F6.4	18.2943	4.78466	0.2618	18.276	1.28443e-74	1.6038e-74	18.2943	-0.17372	0.370163	-0.469308	0.638849	1	18.2943	-0.616387	0.468558	-1.3155	0.188343	0.223608	18.2943	-0.659689	0.389482	-1.69376	0.0903107	0.148779	18.2943	0.608869	0.630478	0.965727	0.334181	0.559676	-0.790107	-0.0075172
WBGene00002032	htp-1	F41H10.10	48.8147	5.62724	0.181539	30.9974	5.84858e-211	1.16076e-210	48.8147	0.244346	0.254663	0.959488	0.337313	0.99478	48.8147	-1.20517	0.3006	-4.00921	6.09217e-05	0.000130547	48.8147	0.386073	0.254675	1.51594	0.129534	0.200265	48.8147	0.500506	0.413198	1.2113	0.22578	0.446745	-0.960821	-0.704661
WBGene00002033	htp-2	Y73B6BL.2	30.6004	4.72487	0.173517	27.23	2.86678e-163	4.87049e-163	30.6004	0.360862	0.240394	1.50113	0.133322	0.965307	30.6004	-1.18053	0.314978	-3.74798	0.000178266	0.000353422	30.6004	0.778892	0.247456	3.1476	0.00164617	0.00467522	30.6004	0.0590806	0.432826	0.1365	0.891426	0.947555	-0.819669	-1.12145
WBGene00002034	htp-3	F57C9.5	55.9759	6.24009	0.130074	47.9733	0	0	55.9759	0.109298	0.182595	0.598584	0.549451	0.99478	55.9759	-2.10239	0.302902	-6.94083	3.89802e-12	2.2048e-11	55.9759	-0.0790175	0.191482	-0.412663	0.679854	0.755768	55.9759	1.33376	0.377403	3.53404	0.000409263	0.00521473	-1.99309	-0.768635
WBGene00002035	hum-1	F29D10.4	82.2897	6.51513	0.15465	42.1283	0	0	82.2897	-0.110562	0.218453	-0.506116	0.612775	0.99478	82.2897	-0.758125	0.236071	-3.21143	0.00132077	0.00227531	82.2897	0.191057	0.215821	0.885256	0.376019	0.475788	82.2897	0.329641	0.337563	0.976532	0.328801	0.554537	-0.868688	-0.428484
WBGene00002036	hum-2	F36D4.3	129.43	7.34404	0.102517	71.6371	0	0	129.43	-0.334959	0.145452	-2.30289	0.0212853	0.769638	129.43	-1.11117	0.174911	-6.35279	2.11444e-10	9.62971e-10	129.43	0.0889406	0.145855	0.609786	0.542003	0.633509	129.43	0.794156	0.242669	3.27259	0.00106568	0.0107604	-1.44613	-0.317017
WBGene00002037	hum-4	F46C3.3	37.5508	5.61128	0.242418	23.1471	1.55589e-118	2.26069e-118	37.5508	-0.543473	0.344542	-1.57738	0.114709	0.955072	37.5508	0.396911	0.357258	1.11099	0.266572	0.308164	37.5508	-0.620318	0.34719	-1.78668	0.0739893	0.12579	37.5508	0.124187	0.514148	0.24154	0.809137	0.897936	-0.146562	0.521098
WBGene00002038	hum-5	T02C12.1	102.176	6.04238	0.163047	37.0591	1.28214e-300	3.40689e-300	102.176	-0.32413	0.231258	-1.4016	0.161036	0.973531	102.176	1.78436	0.228025	7.82529	5.06478e-15	3.81771e-14	102.176	-0.200253	0.235898	-0.848897	0.395939	0.495897	102.176	-0.459598	0.323582	-1.42034	0.155508	0.354873	1.46023	1.32476
WBGene00002039	hum-6	T10H10.1	36.8274	6.13512	0.19898	30.8328	9.51291e-209	1.87542e-208	36.8274	-0.60966	0.283157	-2.15308	0.0313125	0.804202	36.8274	1.07119	0.35251	3.03874	0.00237569	0.00392512	36.8274	-2.10736	0.325716	-6.46993	9.80486e-11	1.16071e-09	36.8274	0.264974	0.458372	0.578077	0.563212	0.746479	0.461526	1.33616
WBGene00002040	hum-7	F56A6.2	16.2168	4.57801	0.294093	15.5665	1.22892e-54	1.42804e-54	16.2168	-0.786492	0.421167	-1.86741	0.0618443	1	16.2168	1.05946	0.47418	2.23429	0.0254639	0.0353841	16.2168	-1.17282	0.453613	-2.5855	0.00972369	0.0219727	16.2168	-0.18425	0.66945	-0.275226	0.783142	0.885202	0.272965	0.875206
WBGene00002041	hum-8	Y66H1A.6	43.2966	4.73268	0.172341	27.4612	5.11066e-166	8.74911e-166	43.2966	0.0807274	0.241053	0.334895	0.737704	0.99478	43.2966	1.88514	0.272853	6.90901	4.88049e-12	2.7271e-11	43.2966	-0.270302	0.273561	-0.988086	0.323111	0.422371	43.2966	-0.852964	0.359516	-2.37254	0.0176664	0.0811789	1.96587	1.03218
WBGene00002043	hyl-1	C09G4.1	44.8295	5.66712	0.12593	45.0021	0	0	44.8295	-0.339619	0.179326	-1.89386	0.0582433	0.894412	44.8295	-0.67964	0.242497	-2.80267	0.00506817	0.00790296	44.8295	0.130094	0.190335	0.683498	0.494292	0.588451	44.8295	0.673613	0.326743	2.0616	0.0392458	0.143099	-1.01926	-0.00602703
WBGene00002044	hyl-2	K02G10.6	27.1237	4.5606	0.274007	16.6441	3.33957e-62	3.97637e-62	27.1237	-0.140379	0.387164	-0.362582	0.716917	0.99478	27.1237	2.23262	0.41948	5.32236	1.02431e-07	3.32888e-07	27.1237	-1.05821	0.426081	-2.48358	0.0130069	0.0283595	27.1237	-1.1268	0.569239	-1.97948	0.0477615	0.162811	2.09224	1.10582
WBGene00002045	icd-1	C56C10.8	489.535	8.94141	0.082958	107.782	0	0	489.535	0.222264	0.116886	1.90154	0.0572307	0.894412	489.535	-0.262083	0.115984	-2.25964	0.0238436	0.033308	489.535	0.0638929	0.114216	0.559405	0.575885	0.662833	489.535	-0.101451	0.16863	-0.601619	0.547428	0.734514	-0.0398187	-0.363534
WBGene00002046	icln-1	C01F6.8	39.3924	5.48571	0.163407	33.5709	4.46451e-247	9.97259e-247	39.3924	0.389166	0.227842	1.70805	0.0876271	0.954102	39.3924	-0.434748	0.291933	-1.48921	0.136433	0.166336	39.3924	-0.193519	0.244526	-0.791407	0.428706	0.527897	39.3924	-0.214881	0.396635	-0.541759	0.587984	0.762746	-0.0455817	-0.649629
WBGene00002047	icp-1	Y39G10AR.13	67.2683	6.63482	0.125062	53.0522	0	0	67.2683	0.0497371	0.175992	0.28261	0.777476	0.99478	67.2683	-1.97976	0.272603	-7.26242	3.80216e-13	2.40056e-12	67.2683	-0.19231	0.182606	-1.05314	0.292277	0.390566	67.2683	0.884044	0.355172	2.48906	0.0128083	0.0653738	-1.93002	-1.09572
WBGene00002048	ida-1	B0244.2	18.7167	3.4543	0.340313	10.1504	3.30175e-24	3.47932e-24	18.7167	0.127003	0.477504	0.265973	0.79026	1	18.7167	0.806925	0.479283	1.68361	0.092257	0.11606	18.7167	0.449409	0.482413	0.931585	0.351551	0.450695	18.7167	-0.125302	0.678551	-0.184661	0.853495	0.927051	0.933929	0.681623
WBGene00002050	ifa-1	F38B2.1	34.8862	3.85603	0.184365	20.9152	3.89569e-97	5.25232e-97	34.8862	-0.020277	0.257721	-0.0786779	0.937289	0.995931	34.8862	1.59182	0.2648	6.0114	1.83931e-09	7.51493e-09	34.8862	0.744631	0.273755	2.72006	0.00652701	0.0156086	34.8862	-0.896177	0.376211	-2.38211	0.0172137	0.0796247	1.57154	0.695641
WBGene00002052	ifa-4	K05B2.3	19.888	4.5857	0.268885	17.0545	3.23707e-65	3.89831e-65	19.888	-0.129807	0.379841	-0.341741	0.732546	1	19.888	1.18105	0.421671	2.80089	0.00509626	0.00794389	19.888	-0.835619	0.410014	-2.03803	0.0415471	0.0774631	19.888	-0.947377	0.597799	-1.58477	0.113017	0.286528	1.05124	0.233675
WBGene00002053	ifb-1	F10C1.2	82.9321	5.76329	0.152817	37.7137	0	0	82.9321	-0.283875	0.21672	-1.30987	0.190241	0.981054	82.9321	1.81679	0.222339	8.17126	3.05176e-16	2.56466e-15	82.9321	-0.204434	0.227559	-0.898379	0.368983	0.468571	82.9321	-0.596514	0.310098	-1.92363	0.054401	0.177685	1.53292	1.22028
WBGene00002054	ifb-2	F10C1.7	105.364	5.52071	0.142255	38.8086	0	0	105.364	-0.0407377	0.200115	-0.203572	0.838688	0.99478	105.364	1.62777	0.194109	8.38588	5.03481e-17	4.51361e-16	105.364	0.627151	0.203184	3.08662	0.00202446	0.0055989	105.364	-0.910472	0.281542	-3.23387	0.00122125	0.0119665	1.58703	0.7173
WBGene00002056	ifc-2	M6.1	360.665	6.46487	0.117595	54.9759	0	0	360.665	-0.142029	0.166095	-0.85511	0.39249	0.99478	360.665	1.45937	0.144816	10.0774	6.95711e-24	1.04033e-22	360.665	1.69951	0.15755	10.7872	3.95835e-27	1.56366e-25	360.665	-0.772326	0.221722	-3.48332	0.000495243	0.00598161	1.31734	0.687041
WBGene00002057	ifd-1	R04E5.10	17.7593	4.195	0.302957	13.8469	1.32905e-43	1.48685e-43	17.7593	-0.298861	0.429504	-0.695829	0.486536	1	17.7593	1.7655	0.475241	3.71495	0.000203241	0.000399824	17.7593	-1.0187	0.472416	-2.15636	0.0310558	0.0603391	17.7593	-0.770697	0.649568	-1.18648	0.235434	0.45688	1.46664	0.994801
WBGene00002058	ifd-2	F25E2.4	26.0785	4.76463	0.197955	24.0692	5.25454e-128	7.91019e-128	26.0785	-0.307433	0.28111	-1.09364	0.274114	0.993234	26.0785	1.42653	0.351759	4.05541	5.00459e-05	0.000108796	26.0785	-1.03307	0.331887	-3.11272	0.00185373	0.00518692	26.0785	0.100725	0.441023	0.22839	0.819343	0.905134	1.11909	1.52725
WBGene00002059	ife-1	F53A2.6	195.414	7.16026	0.0970062	73.8123	0	0	195.414	0.281753	0.135746	2.07558	0.0379324	0.811344	195.414	-0.407998	0.141726	-2.87878	0.00399215	0.00633513	195.414	0.81748	0.134312	6.08642	1.15465e-09	1.183e-08	195.414	-0.166766	0.204399	-0.815881	0.414568	0.629916	-0.126245	-0.574764
WBGene00002060	ife-2	R04A9.4	34.4013	4.79481	0.221656	21.6318	9.02436e-104	1.24441e-103	34.4013	0.0657209	0.311595	0.210918	0.832951	0.99478	34.4013	0.746316	0.325021	2.29621	0.0216639	0.03043	34.4013	0.0977708	0.320174	0.305368	0.760086	0.821832	34.4013	-0.737511	0.468392	-1.57456	0.115358	0.290356	0.812037	0.0088043
WBGene00002061	ife-3	B0348.6	124.633	6.96246	0.123325	56.4561	0	0	124.633	0.238884	0.173213	1.37913	0.167855	0.97598	124.633	-2.00523	0.210478	-9.52705	1.61819e-21	2.06452e-20	124.633	0.687116	0.16951	4.05355	5.04463e-05	0.000212335	124.633	0.888535	0.286463	3.10174	0.00192386	0.0164426	-1.76635	-1.1167
WBGene00002064	iff-1	T05G5.10	255.655	7.40483	0.103806	71.3333	0	0	255.655	0.21274	0.145815	1.45897	0.144573	0.968704	255.655	-1.40917	0.149907	-9.4003	5.44061e-21	6.62105e-20	255.655	1.32169	0.13984	9.45145	3.34174e-21	9.14276e-20	255.655	0.687258	0.21507	3.19552	0.00139581	0.0131402	-1.19643	-0.721913
WBGene00002065	iff-2	F54C9.1	341.481	6.50438	0.117151	55.5214	0	0	341.481	0.0335848	0.16472	0.203891	0.838439	0.99478	341.481	2.0767	0.148217	14.0112	1.33196e-44	6.47316e-43	341.481	1.08999	0.160589	6.78748	1.14106e-11	1.50518e-10	341.481	-1.11099	0.221004	-5.02703	4.98134e-07	3.0135e-05	2.11028	0.965706
WBGene00002066	ifg-1	M110.4	233.316	8.21394	0.0842092	97.5421	0	0	233.316	0.0825838	0.118602	0.69631	0.486235	0.99478	233.316	0.129926	0.134512	0.965908	0.33409	0.377243	233.316	-0.653674	0.123932	-5.27446	1.3315e-07	9.69998e-07	233.316	-0.154492	0.186686	-0.827551	0.407925	0.625371	0.21251	-0.0245661
WBGene00002068	ify-1	C27A2.3	206.635	7.97134	0.166209	47.9597	0	0	206.635	0.343878	0.234525	1.46627	0.142574	0.968704	206.635	-2.46101	0.246531	-9.98257	1.81699e-23	2.65259e-22	206.635	0.311791	0.223462	1.39528	0.162933	0.242413	206.635	0.922812	0.350174	2.63529	0.00840645	0.0485208	-2.11713	-1.5382
WBGene00002069	ikb-1	C04F12.3	14.8727	4.11932	0.317542	12.9725	1.75161e-38	1.9315e-38	14.8727	-0.569109	0.45302	-1.25625	0.209024	1	14.8727	1.58571	0.509415	3.1128	0.00185324	0.00311913	14.8727	-1.14782	0.499237	-2.29914	0.0214968	0.0440003	14.8727	-0.428533	0.696735	-0.615059	0.538516	0.728316	1.0166	1.15717
WBGene00002070	ile-1	K07A1.8	87.085	6.26147	0.121766	51.4223	0	0	87.085	0.279122	0.170069	1.64123	0.10075	0.954102	87.085	-1.12837	0.201517	-5.59936	2.15144e-08	7.64072e-08	87.085	0.764937	0.170357	4.4902	7.11549e-06	3.65116e-05	87.085	0.104477	0.282743	0.369513	0.711745	0.844028	-0.849246	-1.02389
WBGene00002071	ile-2	T04G9.3	29.6001	5.24309	0.194092	27.0134	1.02759e-160	1.72951e-160	29.6001	-0.220513	0.274725	-0.80267	0.422166	0.99478	29.6001	0.901948	0.324592	2.77871	0.00545752	0.00845527	29.6001	-0.852649	0.303907	-2.80562	0.00502197	0.0124362	29.6001	-0.853214	0.463249	-1.84181	0.0655036	0.202357	0.681435	0.048734
WBGene00002072	ima-1	T19B10.7	66.451	6.16721	0.14653	42.0884	0	0	66.451	0.0252591	0.206295	0.122442	0.902549	0.995157	66.451	-1.87456	0.26518	-7.06903	1.56017e-12	9.19788e-12	66.451	0.54229	0.204452	2.65241	0.00799186	0.0185764	66.451	1.0445	0.355915	2.93469	0.00333878	0.0249564	-1.8493	-0.830062
WBGene00002073	ima-2	F26B1.3	310.431	8.07363	0.193877	41.6431	0	0	310.431	0.268349	0.273812	0.980048	0.327062	0.99478	310.431	-2.68967	0.25981	-10.3525	4.07853e-25	6.84729e-24	310.431	1.17348	0.257582	4.55577	5.21952e-06	2.75601e-05	310.431	1.16118	0.382418	3.0364	0.00239419	0.0194357	-2.42132	-1.5285
WBGene00002074	ima-3	F32E10.4	133.635	6.88187	0.0932678	73.7862	0	0	133.635	0.256869	0.130161	1.97346	0.0484428	0.859024	133.635	-0.40098	0.153599	-2.61057	0.00903928	0.0136133	133.635	0.37828	0.134811	2.80601	0.00501589	0.0124295	133.635	0.0386244	0.211531	0.182595	0.855116	0.927516	-0.144111	-0.362355
WBGene00002075	imb-1	F28B3.8	59.3534	5.82405	0.150149	38.7886	0	0	59.3534	0.23145	0.210209	1.10104	0.270878	0.993234	59.3534	-1.29375	0.258166	-5.0113	5.40626e-07	1.58163e-06	59.3534	0.556295	0.21138	2.63172	0.00849529	0.019617	59.3534	0.540058	0.351737	1.5354	0.124685	0.306622	-1.0623	-0.753691
WBGene00002076	imb-2	R06A4.4	58.2944	6.29808	0.130772	48.1608	0	0	58.2944	0.19785	0.183301	1.07937	0.280424	0.99478	58.2944	-1.01225	0.254406	-3.9789	6.92356e-05	0.000147009	58.2944	-0.314704	0.195477	-1.60993	0.107413	0.171079	58.2944	0.31938	0.338772	0.942757	0.345805	0.570493	-0.814405	-0.692875
WBGene00002077	imb-3	C53D5.6	432.326	8.32594	0.087206	95.4744	0	0	432.326	0.0983875	0.122869	0.800751	0.423276	0.99478	432.326	-0.799582	0.119211	-6.70729	1.98278e-11	1.02577e-10	432.326	1.05092	0.117703	8.92861	4.31405e-19	1.05523e-17	432.326	-0.0285826	0.177043	-0.161445	0.871743	0.937368	-0.701194	-0.828165
WBGene00002078	xpo-1	ZK742.1	161.575	7.20533	0.0987763	72.9459	0	0	161.575	0.328667	0.138204	2.37812	0.017401	0.759094	161.575	-0.771975	0.156648	-4.92807	8.30447e-07	2.3658e-06	161.575	0.4581	0.138938	3.29716	0.000976668	0.00296335	161.575	0.0743238	0.219284	0.338938	0.734656	0.857983	-0.443308	-0.697651
WBGene00002079	xpo-2	Y48G1A.5	143.757	6.91089	0.163314	42.3166	0	0	143.757	0.100873	0.230303	0.438	0.661386	0.99478	143.757	-1.72705	0.22961	-7.52167	5.40819e-14	3.68886e-13	143.757	1.17077	0.218924	5.34786	8.89998e-08	6.72231e-07	143.757	0.310641	0.338371	0.918047	0.358594	0.581796	-1.62618	-1.41641
WBGene00002080	xpo-3	C49H3.10	59.3411	6.11769	0.192638	31.7575	2.50136e-221	5.11844e-221	59.3411	-0.032629	0.271893	-0.120007	0.904478	0.995157	59.3411	-0.870404	0.29282	-2.97249	0.00295394	0.00480527	59.3411	0.10043	0.267843	0.37496	0.70769	0.780604	59.3411	0.317528	0.418537	0.758662	0.448055	0.656097	-0.903033	-0.552876
WBGene00002081	ina-1	F54G8.3	36.9333	5.25228	0.161836	32.4544	4.70048e-231	9.90372e-231	36.9333	-0.374061	0.230472	-1.62302	0.104584	0.954102	36.9333	0.961943	0.271754	3.53975	0.000400503	0.00075242	36.9333	-0.476867	0.254948	-1.87045	0.0614212	0.107951	36.9333	-0.218235	0.37107	-0.588123	0.55645	0.741471	0.587881	0.743708
WBGene00002083	inf-1	F57B9.6	255.841	7.98515	0.0968803	82.4229	0	0	255.841	0.288751	0.136187	2.12025	0.0339848	0.811344	255.841	0.558255	0.139941	3.98922	6.62913e-05	0.000141	255.841	-0.309964	0.13807	-2.24498	0.0247696	0.0497075	255.841	-0.725381	0.200916	-3.61038	0.000305753	0.00418725	0.847006	-0.167126
WBGene00002089	ins-6	ZK84.6	11.9585	2.07392	0.433066	4.78891	1.67686e-06	1.69036e-06	11.9585	-0.141081	0.611184	-0.230832	0.817445	1	11.9585	0.361513	0.563087	0.64202	0.52086	0.562267	11.9585	1.6962	0.583652	2.90619	0.00365862	0.00942667	11.9585	-0.0766983	0.850221	-0.0902098	0.928121	1	0.220432	0.284815
WBGene00002113	ins-30	ZC334.2	15.8317	4.15575	0.414223	10.0326	1.09552e-23	1.15181e-23	15.8317	-0.567423	0.588756	-0.963767	0.335163	1	15.8317	-0.154559	0.582149	-0.265497	0.790626	0.81376	15.8317	0.0615727	0.572589	0.107534	0.914365	0.938226	15.8317	0.231635	0.861117	0.268993	0.787935	0.888006	-0.721983	0.0770756
WBGene00002125	inx-3	F22F4.2	47.8895	6.80824	0.197167	34.5304	2.80721e-261	6.59989e-261	47.8895	0.0317662	0.278383	0.11411	0.909151	0.995157	47.8895	-2.07359	0.525481	-3.94608	7.94404e-05	0.000166949	47.8895	-2.3221	0.308895	-7.51746	5.58523e-14	9.29237e-13	47.8895	1.48306	0.635149	2.33497	0.0195448	0.0872182	-2.04182	-0.590534
WBGene00002127	inx-5	R09F10.4	27.0089	5.26124	0.15681	33.5517	8.49209e-247	1.89348e-246	27.0089	-0.594691	0.225613	-2.63589	0.00839163	0.747418	27.0089	1.10863	0.326615	3.3943	0.000688047	0.00124087	27.0089	-1.44697	0.287913	-5.02572	5.01551e-07	3.25078e-06	27.0089	0.595209	0.39132	1.52103	0.128253	0.312196	0.513939	1.70384
WBGene00002129	inx-7	K02B2.4	36.5836	5.81657	0.181047	32.1275	1.82302e-226	3.79342e-226	36.5836	-0.413204	0.257241	-1.60629	0.10821	0.954102	36.5836	-1.44683	0.351269	-4.11886	3.80756e-05	8.4312e-05	36.5836	-0.378144	0.264109	-1.43177	0.152209	0.229415	36.5836	1.35799	0.462323	2.93731	0.00331074	0.0248442	-1.86003	-0.0888404
WBGene00002130	inx-8	ZK792.2	151.165	6.31382	0.152093	41.513	0	0	151.165	0.192519	0.213719	0.900806	0.367692	0.99478	151.165	1.5814	0.20388	7.75652	8.72918e-15	6.44824e-14	151.165	0.254025	0.213467	1.19	0.234048	0.325411	151.165	-0.884293	0.29536	-2.99395	0.00275395	0.0217966	1.77392	0.69711
WBGene00002131	inx-9	ZK792.3	29.0225	3.91416	0.172878	22.6411	1.70685e-113	2.43973e-113	29.0225	-0.399013	0.24867	-1.60459	0.108584	0.954102	29.0225	1.33086	0.270993	4.91105	9.05878e-07	2.56683e-06	29.0225	0.489006	0.267599	1.82738	0.0676421	0.116992	29.0225	-0.241867	0.375324	-0.644421	0.519302	0.715261	0.931848	1.08899
WBGene00002132	inx-10	T18H9.5	13.9719	3.82378	0.242888	15.743	7.67383e-56	8.95664e-56	13.9719	0.124388	0.339415	0.366476	0.71401	1	13.9719	0.207914	0.423642	0.490779	0.623583	0.658528	13.9719	-0.0603901	0.373235	-0.161802	0.871462	0.907126	13.9719	-0.718692	0.602137	-1.19357	0.232647	1	0.332302	-0.510778
WBGene00002134	inx-12	ZK770.3	50.5948	4.88987	0.138382	35.336	1.64256e-273	4.02175e-273	50.5948	-0.00696229	0.193611	-0.0359602	0.971314	0.998148	50.5948	1.64031	0.223249	7.34746	2.02016e-13	1.3148e-12	50.5948	0.0387627	0.221042	0.175364	0.860794	0.899899	50.5948	-0.69899	0.295693	-2.36391	0.0180833	0.082281	1.63335	0.941323
WBGene00002135	inx-13	Y8G1A.2	45.2482	5.1049	0.159292	32.0474	2.38271e-225	4.9469e-225	45.2482	-0.281511	0.226149	-1.2448	0.213203	0.992277	45.2482	1.22336	0.250838	4.8771	1.07659e-06	3.0124e-06	45.2482	-0.102003	0.244604	-0.417014	0.676668	0.753247	45.2482	-0.379729	0.345864	-1.09791	0.272242	0.498549	0.941851	0.843633
WBGene00002136	inx-14	F07A5.1	91.1673	6.16369	0.150337	40.999	0	0	91.1673	0.464934	0.210175	2.21213	0.0269574	0.792078	91.1673	-2.51373	0.260369	-9.65447	4.70569e-22	6.16328e-21	91.1673	1.26	0.203352	6.19616	5.78565e-10	6.14735e-09	91.1673	0.948506	0.350995	2.70233	0.00688546	0.0418359	-2.04879	-1.56522
WBGene00002137	inx-15	R12E2.9	35.3719	4.37741	0.182345	24.0063	2.39223e-127	3.59248e-127	35.3719	-0.303791	0.259433	-1.17098	0.241607	0.993234	35.3719	2.62036	0.320097	8.18613	2.69754e-16	2.27215e-15	35.3719	-0.830679	0.321937	-2.58025	0.00987276	0.0222619	35.3719	-0.359027	0.378876	-0.947609	0.343328	0.568538	2.31657	2.26133
WBGene00002139	inx-17	R12E2.4	18.4454	3.9867	0.234792	16.9797	1.16022e-64	1.39404e-64	18.4454	-0.0518297	0.330311	-0.156912	0.875314	1	18.4454	2.14909	0.429682	5.00158	5.68635e-07	1.657e-06	18.4454	-1.17218	0.418089	-2.80365	0.00505279	0.0124958	18.4454	-0.479254	0.511372	-0.937192	0.34866	0.57357	2.09726	1.66983
WBGene00002143	inx-21	Y47G6A.1	37.1954	5.61899	0.254215	22.1033	2.93991e-108	4.12638e-108	37.1954	-0.00268939	0.358833	-0.00749483	0.99402	0.998148	37.1954	-2.11843	0.421552	-5.0253	5.02647e-07	1.4793e-06	37.1954	0.270588	0.348399	0.776662	0.437358	0.536227	37.1954	0.571541	0.595623	0.959568	0.337273	0.562418	-2.12112	-1.54689
WBGene00002144	inx-22	Y47G6A.2	60.7845	6.05887	0.145112	41.7529	0	0	60.7845	0.0346274	0.204165	0.169605	0.865321	0.99478	60.7845	-2.58407	0.304537	-8.48524	2.15281e-17	1.97306e-16	60.7845	0.634253	0.202422	3.13332	0.00172839	0.00487616	60.7845	1.58922	0.38814	4.09446	4.23162e-05	0.000955824	-2.54944	-0.994849
WBGene00002146	ipp-5	C09B8.1	17.5502	4.28534	0.359634	11.9159	9.78505e-33	1.05939e-32	17.5502	-0.599019	0.511999	-1.16996	0.242016	1	17.5502	1.72082	0.522398	3.29407	0.000987466	0.00173842	17.5502	-0.923607	0.53116	-1.73885	0.0820616	0.137605	17.5502	-1.06027	0.764322	-1.38721	0.165378	0.369224	1.1218	0.660544
WBGene00002147	ire-1	C41C4.4	84.2716	6.64446	0.14501	45.8206	0	0	84.2716	-0.0281215	0.204565	-0.13747	0.890659	0.995157	84.2716	-0.4576	0.226244	-2.0226	0.0431145	0.0577178	84.2716	-0.122502	0.206105	-0.594368	0.552266	0.642556	84.2716	0.12513	0.32054	0.390371	0.696262	0.836308	-0.485722	-0.33247
WBGene00002148	gon-14	F44C4.4	60.7994	6.3303	0.138201	45.8049	0	0	60.7994	0.20378	0.193911	1.05089	0.293309	0.99478	60.7994	-1.45915	0.264099	-5.52501	3.29466e-08	1.14746e-07	60.7994	-0.0546622	0.19996	-0.273365	0.784573	0.841167	60.7994	0.328863	0.358159	0.918204	0.358512	0.581796	-1.25537	-1.13029
WBGene00002152	iars-1	R11A8.6	131.869	6.85785	0.116611	58.8098	0	0	131.869	0.169486	0.163749	1.03503	0.300654	0.99478	131.869	0.509904	0.173013	2.9472	0.00320666	0.00517762	131.869	-0.0246713	0.16804	-0.146819	0.883275	0.915098	131.869	-0.509319	0.245862	-2.07157	0.038306	0.141063	0.679389	0.000584982
WBGene00002153	iars-2	C25A1.7	39.8103	5.70056	0.233182	24.4468	5.44183e-132	8.28841e-132	39.8103	-0.0797245	0.329354	-0.242063	0.808731	0.99478	39.8103	-0.540615	0.352148	-1.53519	0.124737	0.153291	39.8103	-0.205749	0.327149	-0.628915	0.529405	0.62134	39.8103	-0.103019	0.511884	-0.201255	0.840499	0.917993	-0.620339	-0.643634
WBGene00002162	isp-1	F42G8.12	247.385	7.51417	0.0861056	87.267	0	0	247.385	0.183714	0.120736	1.52162	0.128104	0.965307	247.385	0.87338	0.123392	7.0781	1.46148e-12	8.6506e-12	247.385	0.215706	0.123413	1.74784	0.0804922	0.135412	247.385	-0.984747	0.179277	-5.49287	3.95447e-08	3.98714e-06	1.05709	-0.111367
WBGene00002169	isw-1	F37A4.8	102.965	7.11661	0.100592	70.747	0	0	102.965	0.179636	0.141103	1.27309	0.202986	0.9868	102.965	-2.09779	0.221839	-9.45638	3.18777e-21	3.95766e-20	102.965	0.00125669	0.145992	0.00860796	0.993132	0.995693	102.965	0.96829	0.284703	3.40105	0.000671271	0.00759355	-1.91816	-1.1295
WBGene00002173	itr-1	F33D4.2	87.1113	5.75892	0.13419	42.916	0	0	87.1113	-0.204982	0.189896	-1.07944	0.280389	0.99478	87.1113	1.6628	0.202465	8.2128	2.16093e-16	1.8327e-15	87.1113	-0.132293	0.204076	-0.648254	0.516821	0.60967	87.1113	-0.331335	0.2745	-1.20705	0.227413	0.448711	1.45782	1.33147
WBGene00002174	itx-1	W03D8.6	52.3918	5.72323	0.177118	32.313	4.58876e-229	9.60804e-229	52.3918	-0.343086	0.251368	-1.36488	0.172291	0.977785	52.3918	1.89415	0.280316	6.7572	1.40687e-11	7.40737e-11	52.3918	-1.09917	0.279144	-3.93764	8.2287e-05	0.000327155	52.3918	-0.598599	0.375784	-1.59294	0.111175	0.283804	1.55107	1.29555
WBGene00002175	jac-1	Y105C5B.21	17.2953	4.73681	0.223668	21.1778	1.52908e-99	2.07978e-99	17.2953	-0.161593	0.316112	-0.511188	0.609219	1	17.2953	1.10648	0.405431	2.72914	0.00635003	0.00975617	17.2953	-1.27609	0.37281	-3.4229	0.000619559	0.00199159	17.2953	-1.89079	0.643725	-2.93726	0.00331126	0.0248442	0.944883	-0.784311
WBGene00002179	jph-1	T22C1.7	23.7001	5.16517	0.272753	18.9372	5.63233e-80	7.15126e-80	23.7001	-0.634925	0.388413	-1.63466	0.10212	0.954102	23.7001	2.1094	0.446861	4.72047	2.35296e-06	6.26354e-06	23.7001	-1.97959	0.442643	-4.47222	7.74129e-06	3.94646e-05	23.7001	-0.97415	0.611552	-1.59291	0.111179	0.283804	1.47447	1.13525
WBGene00002180	jtr-1	Y77E11A.4	14.4322	4.21035	0.194824	21.611	1.41589e-103	1.95062e-103	14.4322	-0.416426	0.27889	-1.49315	0.135397	1	14.4322	-1.12599	0.454219	-2.47895	0.013177	0.0192141	14.4322	-0.102981	0.307725	-0.334654	0.737886	0.805341	14.4322	1.32066	0.572794	2.30565	0.0211304	1	-1.54241	0.194674
WBGene00002183	kat-1	T02G5.8	108.692	6.9255	0.123747	55.9651	0	0	108.692	0.164319	0.173973	0.944509	0.34491	0.99478	108.692	1.17537	0.195756	6.00425	1.92216e-09	7.83608e-09	108.692	-0.973783	0.189626	-5.13528	2.81722e-07	1.9395e-06	108.692	-0.705494	0.266027	-2.65197	0.00800238	0.047027	1.33969	0.469876
WBGene00002185	kel-3	T27E9.4	51.7284	6.02628	0.139975	43.0525	0	0	51.7284	-0.248885	0.198304	-1.25507	0.209453	0.988437	51.7284	-0.889521	0.250685	-3.54836	0.000387631	0.000729908	51.7284	0.0410912	0.204111	0.201318	0.84045	0.884388	51.7284	0.370462	0.3505	1.05695	0.290532	0.516411	-1.13841	-0.519059
WBGene00002187	kgb-1	T07A9.3	20.6251	4.13709	0.242306	17.0738	2.32436e-65	2.8019e-65	20.6251	-0.402915	0.345375	-1.1666	0.243371	0.993234	20.6251	1.48258	0.391536	3.78656	0.000152746	0.000305451	20.6251	-0.529648	0.382287	-1.38547	0.165908	0.24585	20.6251	-0.245718	0.525351	-0.467721	0.639984	0.80021	1.07966	1.23686
WBGene00002189	kin-1	ZK909.2	36.2299	4.81235	0.189217	25.433	1.08908e-142	1.7253e-142	36.2299	-0.644931	0.272578	-2.36604	0.0179793	0.759094	36.2299	1.36557	0.299075	4.56598	4.97163e-06	1.25686e-05	36.2299	-0.331355	0.292858	-1.13145	0.257864	0.352423	36.2299	0.41621	0.399846	1.04092	0.297911	0.523188	0.720642	1.78178
WBGene00002190	kin-2	R07E4.6	76.8117	5.91154	0.101088	58.4793	0	0	76.8117	-0.257772	0.143526	-1.796	0.0724944	0.922535	76.8117	1.51101	0.17501	8.63389	5.92998e-18	5.74112e-17	76.8117	-0.317602	0.167955	-1.89099	0.0586256	0.104103	76.8117	-0.62805	0.233211	-2.69305	0.00708012	0.0426093	1.25324	0.882963
WBGene00002191	kin-3	B0205.7	117.647	7.06227	0.127658	55.322	0	0	117.647	0.0910341	0.1798	0.506308	0.612641	0.99478	117.647	0.116694	0.193861	0.601948	0.547209	0.586511	117.647	-0.348792	0.183472	-1.90106	0.0572935	0.102229	117.647	-0.204781	0.274165	-0.746926	0.455108	0.662898	0.207728	-0.0880871
WBGene00002192	kin-4	C10C6.1	105.146	6.32643	0.146254	43.2565	0	0	105.146	-0.0328083	0.206219	-0.159095	0.873594	0.99478	105.146	-0.921268	0.209321	-4.40123	1.0764e-05	2.58412e-05	105.146	1.08393	0.198723	5.45446	4.91231e-08	3.8727e-07	105.146	0.12157	0.308413	0.39418	0.693448	0.834657	-0.954077	-0.799698
WBGene00002196	kin-10	T01G9.6	185.217	7.12938	0.0888523	80.2385	0	0	185.217	0.252854	0.124132	2.03698	0.0416518	0.825235	185.217	-0.482979	0.134396	-3.59371	0.000326001	0.000622266	185.217	0.841768	0.123928	6.79239	1.10288e-11	1.46003e-10	185.217	-0.265453	0.193967	-1.36854	0.171142	0.376544	-0.230125	-0.748432
WBGene00002201	kin-18	T17E9.1	127.598	7.58518	0.141039	53.7808	0	0	127.598	0.0879592	0.199002	0.442002	0.658488	0.99478	127.598	-0.908941	0.222364	-4.08764	4.3579e-05	9.56381e-05	127.598	-0.638996	0.19858	-3.21783	0.00129166	0.00378181	127.598	0.338214	0.31209	1.08371	0.278494	0.504815	-0.820982	-0.570727
WBGene00002202	kin-19	C03C10.1	161.925	7.40436	0.081061	91.3431	0	0	161.925	0.121802	0.113627	1.07194	0.283747	0.99478	161.925	0.185623	0.138047	1.34463	0.178744	0.213206	161.925	-0.266478	0.123107	-2.16461	0.0304172	0.0594265	161.925	-0.0760101	0.186239	-0.408133	0.683176	0.827015	0.307425	0.109613
WBGene00002207	sid-3	B0302.1	69.9411	6.31674	0.15863	39.8205	0	0	69.9411	-0.317594	0.224883	-1.41226	0.157874	0.973531	69.9411	1.45188	0.254731	5.69965	1.20056e-08	4.40561e-08	69.9411	-1.27216	0.248106	-5.12748	2.93645e-07	2.01595e-06	69.9411	0.20512	0.332575	0.616764	0.53739	0.727642	1.13428	1.657
WBGene00002210	kin-29	F58H12.1	32.3209	5.14198	0.193019	26.6397	2.35526e-156	3.90009e-156	32.3209	-0.404927	0.274689	-1.47413	0.140447	0.968704	32.3209	1.76525	0.336396	5.24754	1.54148e-07	4.86204e-07	32.3209	-1.31785	0.324393	-4.0625	4.85496e-05	0.000205287	32.3209	0.00596232	0.421111	0.0141586	0.988703	0.993312	1.36032	1.77121
WBGene00002214	klc-1	M7.2	70.6885	6.64979	0.174693	38.0655	0	0	70.6885	0.268448	0.245946	1.09149	0.275057	0.993234	70.6885	-2.24997	0.319574	-7.04052	1.91517e-12	1.1166e-11	70.6885	-0.100628	0.242996	-0.414111	0.678792	0.755043	70.6885	0.682088	0.432627	1.57662	0.114883	0.28958	-1.98152	-1.56788
WBGene00002215	klc-2	C18C4.10	38.2185	5.16244	0.165291	31.2325	3.86295e-214	7.72276e-214	38.2185	-0.0909433	0.232973	-0.390359	0.696271	0.99478	38.2185	1.16823	0.279563	4.17876	2.93108e-05	6.59715e-05	38.2185	-0.582631	0.264533	-2.20249	0.0276306	0.0547351	38.2185	-0.225277	0.365909	-0.615665	0.538116	0.728284	1.07728	0.94295
WBGene00002216	klp-3	T09A5.2	13.7878	4.33581	0.232955	18.6122	2.55944e-77	3.22418e-77	13.7878	-0.349686	0.331266	-1.05561	0.291148	1	13.7878	1.83045	0.488883	3.74414	0.000181012	0.000358386	13.7878	-1.94853	0.452404	-4.30706	1.65438e-05	7.74457e-05	13.7878	-0.647904	0.599352	-1.08101	0.279693	1	1.48076	1.18254
WBGene00002217	klp-4	F56E3.3	58.1369	5.52115	0.13006	42.4507	0	0	58.1369	-0.500794	0.186807	-2.68081	0.00734444	0.747418	58.1369	2.00165	0.226214	8.8485	8.8703e-19	9.13876e-18	58.1369	-0.758479	0.221768	-3.42014	0.000625887	0.00200844	58.1369	-0.169706	0.284195	-0.597147	0.550409	0.736526	1.50086	1.83195
WBGene00002219	klp-7	K11D9.1	91.9003	6.25331	0.17178	36.4029	3.82465e-290	9.83729e-290	91.9003	0.0153926	0.242222	0.0635475	0.949331	0.996752	91.9003	-1.33939	0.249691	-5.36418	8.13197e-08	2.69135e-07	91.9003	0.972602	0.232726	4.17918	2.92568e-05	0.000130586	91.9003	0.655777	0.359839	1.82242	0.0683918	0.207622	-1.32399	-0.68361
WBGene00002220	gcc-1	C15C7.2	19.7444	4.82075	0.244905	19.6841	2.94952e-86	3.83323e-86	19.7444	-0.113097	0.345841	-0.327021	0.743652	1	19.7444	0.524173	0.428645	1.22286	0.221382	0.259951	19.7444	-1.12171	0.385721	-2.90809	0.00363649	0.00937843	19.7444	-0.221493	0.578933	-0.382587	0.702026	0.839136	0.411076	0.302681
WBGene00002221	klp-10	C33H5.4	30.6443	5.14731	0.180644	28.4943	1.38026e-178	2.46816e-178	30.6443	-0.0255607	0.254283	-0.100521	0.919931	0.995166	30.6443	-1.73415	0.354974	-4.88529	1.03276e-06	2.89744e-06	30.6443	0.421196	0.258076	1.63206	0.102667	0.164834	30.6443	0.666056	0.480248	1.3869	0.165472	0.369224	-1.75971	-1.06809
WBGene00002223	klp-12	T01G1.1	141.181	7.46692	0.104354	71.5536	0	0	141.181	0.0821635	0.146919	0.559243	0.575996	0.99478	141.181	-0.0713501	0.169877	-0.42001	0.674478	0.705838	141.181	-0.533906	0.153431	-3.47977	0.00050185	0.0016572	141.181	-0.0179097	0.234591	-0.0763441	0.939145	0.970187	0.0108135	-0.0892597
WBGene00002225	klp-15	M01E11.6	135.018	6.59883	0.1908	34.585	4.24531e-262	1.00128e-261	135.018	0.327963	0.268667	1.22071	0.222197	0.993234	135.018	-2.61669	0.273592	-9.56422	1.13048e-21	1.45233e-20	135.018	1.63911	0.253784	6.45866	1.05634e-10	1.2386e-09	135.018	0.604295	0.397289	1.52104	0.128249	0.312196	-2.28873	-2.0124
WBGene00002226	klp-16	C41G7.2	122.222	6.51647	0.415947	15.6666	2.55971e-55	2.98148e-55	122.222	0.287355	0.587711	0.48894	0.624884	0.99478	122.222	-2.62754	0.532756	-4.93197	8.14029e-07	2.32197e-06	122.222	1.50748	0.551144	2.73517	0.00623472	0.0150313	122.222	0.905175	0.799722	1.13186	0.257693	0.481151	-2.34018	-1.72236
WBGene00002228	klp-18	C06G3.2	73.2479	6.21097	0.174576	35.5774	3.13573e-277	7.77044e-277	73.2479	0.0872394	0.245931	0.354731	0.722791	0.99478	73.2479	-1.99321	0.285989	-6.96954	3.1797e-12	1.81098e-11	73.2479	0.683715	0.23862	2.86529	0.00416631	0.0105544	73.2479	1.05061	0.393841	2.66759	0.00763975	0.0452338	-1.90597	-0.942604
WBGene00002229	klp-19	Y43F4B.6	234.416	7.96083	0.176481	45.1087	0	0	234.416	0.104629	0.249285	0.419715	0.674694	0.99478	234.416	-2.6612	0.249479	-10.667	1.45187e-26	2.68292e-25	234.416	0.802927	0.235531	3.40901	0.000651989	0.00208405	234.416	1.18172	0.3608	3.27527	0.00105561	0.0106902	-2.55657	-1.47948
WBGene00002231	knl-1	C02F5.1	70.667	6.7781	0.1843	36.7776	4.21734e-296	1.10788e-295	70.667	0.0401863	0.260126	0.154488	0.877225	0.995022	70.667	-1.49904	0.304614	-4.92111	8.60552e-07	2.44496e-06	70.667	-0.447979	0.257641	-1.73877	0.0820751	0.137605	70.667	0.496666	0.425958	1.166	0.243615	0.465251	-1.45885	-1.00237
WBGene00002232	kpc-1	F11A6.1	26.0859	5.70498	0.183773	31.0436	1.3901e-211	2.76188e-211	26.0859	-0.709523	0.263155	-2.69622	0.00701311	0.747418	26.0859	1.40362	0.362328	3.87388	0.000107115	0.000219733	26.0859	-2.15494	0.330622	-6.51783	7.13338e-11	8.55426e-10	26.0859	-0.895075	0.513671	-1.7425	0.0814203	0.232338	0.694093	0.508542
WBGene00002234	kqt-2	M60.5	26.0208	4.09133	0.202609	20.1933	1.12224e-90	1.48036e-90	26.0208	-0.178619	0.286385	-0.623702	0.532824	0.99478	26.0208	1.62811	0.33952	4.79533	1.62404e-06	4.42523e-06	26.0208	-0.34592	0.330896	-1.0454	0.295837	0.394182	26.0208	0.0594635	0.426979	0.139266	0.88924	0.94665	1.44949	1.68758
WBGene00002235	kqt-3	Y54G9A.3	16.2832	4.65846	0.376481	12.3737	3.62693e-35	3.96158e-35	16.2832	-0.740673	0.535975	-1.38192	0.166997	1	16.2832	1.07292	0.590392	1.81731	0.0691701	0.0892194	16.2832	-1.70675	0.570961	-2.98926	0.00279658	0.00742304	16.2832	0.830518	0.788909	1.05274	0.292459	0.51834	0.332251	1.90344
WBGene00002238	kars-1	T02G5.9	280.866	7.72156	0.106152	72.7406	0	0	280.866	0.202633	0.149364	1.35664	0.174895	0.977785	280.866	-0.202549	0.144105	-1.40556	0.159853	0.192225	280.866	0.745621	0.144587	5.15691	2.51065e-07	1.74142e-06	280.866	-0.419701	0.214003	-1.9612	0.0498559	0.167802	8.36361e-05	-0.622251
WBGene00002239	ksr-1	F13B9.5	16.7153	4.10398	0.220928	18.5761	5.01401e-77	6.3098e-77	16.7153	0.0181537	0.309918	0.0585758	0.95329	1	16.7153	1.37478	0.398405	3.4507	0.00055914	0.00102363	16.7153	-0.796972	0.373545	-2.13354	0.0328808	0.0635008	16.7153	-0.848919	0.523954	-1.62022	0.105186	0.273869	1.39293	0.525857
WBGene00002240	ksr-2	F58D5.4	34.9952	4.99934	0.146808	34.0536	3.59519e-254	8.22218e-254	34.9952	0.339939	0.202882	1.67555	0.0938262	0.954102	34.9952	-0.872984	0.279395	-3.12455	0.00178079	0.00300679	34.9952	0.509676	0.216778	2.35115	0.0187155	0.0390211	34.9952	0.171192	0.372664	0.459374	0.645966	0.803214	-0.533045	-0.701792
WBGene00002241	kup-1	F10C2.2	71.1851	6.75052	0.131336	51.3989	0	0	71.1851	0.215649	0.1845	1.16883	0.24247	0.993234	71.1851	-1.62216	0.267643	-6.06093	1.3534e-09	5.60222e-09	71.1851	-0.457713	0.192627	-2.37616	0.017494	0.0367647	71.1851	0.522502	0.354284	1.47481	0.140263	0.330783	-1.40652	-1.09966
WBGene00002244	laf-1	Y71H2AM.19	95.3666	6.66873	0.167372	39.8438	0	0	95.3666	0.184143	0.235745	0.781112	0.434737	0.99478	95.3666	0.384868	0.239578	1.60644	0.108177	0.134326	95.3666	-0.351162	0.236372	-1.48563	0.137376	0.209972	95.3666	-0.544538	0.345925	-1.57415	0.115453	0.290459	0.569011	-0.15967
WBGene00002245	lag-1	K08B4.1	51.7069	6.0231	0.137313	43.864	0	0	51.7069	0.124093	0.192627	0.644213	0.519437	0.99478	51.7069	-1.72256	0.290005	-5.93976	2.85436e-09	1.13494e-08	51.7069	0.0339019	0.201033	0.168638	0.866081	0.903381	51.7069	1.09312	0.370151	2.95317	0.00314524	0.0239838	-1.59847	-0.62944
WBGene00002247	lam-1	W03F8.5	69.2473	7.09983	0.123601	57.4413	0	0	69.2473	-0.546799	0.176003	-3.10676	0.00189151	0.428564	69.2473	1.2496	0.237124	5.2698	1.36573e-07	4.3392e-07	69.2473	-2.19986	0.215866	-10.1909	2.17844e-24	7.31461e-23	69.2473	-0.322312	0.31137	-1.03514	0.300604	0.525849	0.702798	0.927285
WBGene00002248	lam-3	T22A3.8	37.892	6.59704	0.183096	36.0306	2.78076e-284	7.03716e-284	37.892	-0.620898	0.260367	-2.3847	0.0170929	0.759094	37.892	-0.25886	0.373955	-0.692223	0.488797	0.532637	37.892	-2.26526	0.297878	-7.60464	2.85697e-14	4.91945e-13	37.892	0.391867	0.508897	0.770033	0.441281	0.652218	-0.879758	0.133007
WBGene00002249	lap-1	ZK353.6	119.944	6.62254	0.114363	57.9082	0	0	119.944	0.0704244	0.160692	0.438257	0.6612	0.99478	119.944	-0.219075	0.170748	-1.28303	0.19948	0.235883	119.944	0.585783	0.160645	3.64645	0.000265888	0.000941117	119.944	-0.261409	0.247732	-1.05521	0.29133	0.517429	-0.148651	-0.480484
WBGene00002250	lap-2	W07G4.4	245.494	7.4144	0.0893084	83.0203	0	0	245.494	0.0782027	0.12551	0.62308	0.533232	0.99478	245.494	-0.29604	0.126894	-2.33297	0.0196497	0.0278021	245.494	0.943399	0.12287	7.678	1.61588e-14	2.86247e-13	245.494	-0.213991	0.186593	-1.14684	0.251449	0.473816	-0.217838	-0.510032
WBGene00002251	lat-1	B0457.1	96.4291	6.42261	0.114284	56.1988	0	0	96.4291	0.0192172	0.160646	0.119625	0.90478	0.995157	96.4291	-1.14734	0.193231	-5.93765	2.89138e-09	1.14831e-08	96.4291	0.685678	0.160778	4.26475	2.00125e-05	9.2511e-05	96.4291	0.736544	0.264292	2.78686	0.00532219	0.0346042	-1.12812	-0.410793
WBGene00002252	lat-2	B0286.2	15.1875	4.59194	0.287895	15.9501	2.84535e-57	3.34159e-57	15.1875	-0.227541	0.407454	-0.558445	0.57654	1	15.1875	1.44629	0.508122	2.84635	0.00442236	0.00697289	15.1875	-1.80309	0.47973	-3.75856	0.000170897	0.000631838	15.1875	-0.794134	0.679671	-1.16841	0.242641	0.464389	1.21875	0.652159
WBGene00002253	lbp-1	F40F4.3	197.117	8.43304	0.188324	44.7794	0	0	197.117	-0.0677435	0.266245	-0.25444	0.799156	0.99478	197.117	1.28785	0.257655	4.99838	5.78153e-07	1.68341e-06	197.117	-2.14162	0.26494	-8.08341	6.29795e-16	1.25738e-14	197.117	-0.684304	0.373571	-1.83179	0.0669822	0.205013	1.22011	0.60355
WBGene00002254	lbp-2	F40F4.2	2340.53	8.84435	0.128089	69.0486	0	0	2340.53	0.00390446	0.180996	0.0215721	0.982789	0.998148	2340.53	2.00425	0.157038	12.7629	2.64296e-37	9.47745e-36	2340.53	1.53594	0.169992	9.0354	1.63404e-19	4.13377e-18	2340.53	-0.760873	0.239372	-3.17862	0.00147976	0.0138184	2.00816	1.24338
WBGene00002255	lbp-3	F40F4.4	281.435	6.75815	0.141998	47.5933	0	0	281.435	-0.0106703	0.200283	-0.0532761	0.957512	0.997385	281.435	2.02245	0.183015	11.0508	2.1737e-28	4.57467e-27	281.435	0.50272	0.195586	2.57033	0.0101603	0.0228753	281.435	-0.903154	0.270138	-3.34331	0.000827858	0.00887915	2.01178	1.1193
WBGene00002256	lbp-4	ZK742.5	17.3797	4.46311	0.238402	18.721	3.33988e-78	4.21882e-78	17.3797	-0.173167	0.337027	-0.513808	0.607386	1	17.3797	-0.976199	0.457015	-2.13603	0.0326767	0.044585	17.3797	-0.18495	0.354806	-0.521272	0.602177	0.687524	17.3797	0.976279	0.599086	1.62961	0.103183	0.271062	-1.14937	8.08159e-05
WBGene00002257	lbp-5	W02D3.7	36.4124	3.73806	0.369346	10.1208	4.46913e-24	4.70747e-24	36.4124	0.105949	0.519661	0.203881	0.838447	0.99478	36.4124	2.56776	0.482766	5.31885	1.04427e-07	3.39079e-07	36.4124	0.299559	0.517476	0.578885	0.562667	0.652192	36.4124	-1.86542	0.7109	-2.62402	0.00868981	0.0494318	2.67371	0.70234
WBGene00002258	lbp-6	W02D3.5	119.648	6.99341	0.137567	50.8363	0	0	119.648	0.125267	0.193754	0.646524	0.51794	0.99478	119.648	1.96936	0.215436	9.1413	6.17081e-20	7.10027e-19	119.648	-1.51677	0.21528	-7.04559	1.84679e-12	2.69078e-11	119.648	-0.664412	0.282299	-2.35358	0.0185938	0.0840527	2.09463	1.30495
WBGene00002259	lbp-7	T22G5.2	15.7635	2.60988	0.335837	7.77127	7.77061e-15	7.99129e-15	15.7635	0.290484	0.464962	0.624747	0.532137	1	15.7635	2.09027	0.474096	4.40897	1.03866e-05	2.50165e-05	15.7635	0.456102	0.498637	0.914698	0.36035	0.459742	15.7635	-1.39416	0.661557	-2.10739	0.0350837	0.132148	2.38076	0.696113
WBGene00002261	ldb-1	F58A3.1	18.4549	4.72321	0.219063	21.561	4.17937e-103	5.74702e-103	18.4549	0.120528	0.307416	0.392066	0.695009	1	18.4549	0.901206	0.40782	2.20981	0.0271182	0.0374504	18.4549	-1.24379	0.366802	-3.3909	0.000696634	0.00220955	18.4549	-1.40645	0.586138	-2.39953	0.0164164	0.0774824	1.02173	-0.505248
WBGene00002262	ldh-1	F13D12.2	79.7987	6.26695	0.148351	42.2441	0	0	79.7987	-0.107426	0.209469	-0.512848	0.608058	0.99478	79.7987	0.988142	0.22187	4.4537	8.44048e-06	2.0632e-05	79.7987	-0.39997	0.218414	-1.83125	0.0670632	0.116208	79.7987	-0.592189	0.314521	-1.88283	0.0597235	0.189724	0.880716	0.395952
WBGene00002263	lea-1	K08H10.1	221.393	7.87172	0.119371	65.9432	0	0	221.393	-0.818889	0.170232	-4.81043	1.50609e-06	0.00469976	221.393	0.575798	0.164661	3.49688	0.000470742	0.000875031	221.393	-0.264369	0.1665	-1.58781	0.11233	0.177645	221.393	0.52727	0.240472	2.19265	0.0283329	0.112893	-0.243091	1.10307
WBGene00002264	lec-1	W09H1.6	187.431	6.48137	0.0884352	73.2895	0	0	187.431	0.167427	0.123067	1.36045	0.173687	0.977785	187.431	0.298469	0.123602	2.41475	0.015746	0.0226913	187.431	1.26797	0.122542	10.3472	4.30712e-25	1.52965e-23	187.431	-0.447602	0.181473	-2.46649	0.0136444	0.0682908	0.465896	-0.149133
WBGene00002265	lec-2	F52H3.7	368.724	7.27072	0.118341	61.4389	0	0	368.724	-0.0601692	0.167033	-0.360223	0.71868	0.99478	368.724	1.3053	0.151593	8.61051	7.27391e-18	6.97823e-17	368.724	0.852074	0.161064	5.29028	1.22132e-07	8.99489e-07	368.724	-0.510114	0.226113	-2.25601	0.0240701	0.100814	1.24513	0.795181
WBGene00002266	lec-3	ZK892.1	35.3515	4.65923	0.152261	30.6003	1.21453e-205	2.37034e-205	35.3515	-0.339305	0.217344	-1.56114	0.118491	0.965307	35.3515	1.76343	0.258444	6.82325	8.9002e-12	4.81301e-11	35.3515	-0.268093	0.25317	-1.05894	0.289626	0.387795	35.3515	-0.79564	0.348204	-2.28498	0.022314	0.0960039	1.42412	0.967787
WBGene00002267	lec-4	C44F1.3	102.128	5.11796	0.163923	31.2218	5.3916e-214	1.07672e-213	102.128	0.0556079	0.229861	0.24192	0.808842	0.99478	102.128	1.35289	0.211737	6.38949	1.66441e-10	7.67001e-10	102.128	1.21341	0.225489	5.38124	7.39737e-08	5.69805e-07	102.128	-0.818434	0.315514	-2.59397	0.00948742	0.0525928	1.4085	0.534456
WBGene00002268	lec-5	ZK1248.16	199.782	6.31109	0.164124	38.4532	0	0	199.782	-0.0110557	0.231479	-0.0477611	0.961907	0.997385	199.782	1.87944	0.211486	8.88684	6.28702e-19	6.58755e-18	199.782	0.563442	0.225704	2.49638	0.0125468	0.0274942	199.782	-0.907552	0.313052	-2.89905	0.003743	0.0272956	1.86838	0.971887
WBGene00002269	lec-6	Y55B1AR.1	387.159	6.71737	0.150241	44.7108	0	0	387.159	-0.29907	0.212847	-1.40509	0.159994	0.973531	387.159	1.64617	0.186833	8.81093	1.24111e-18	1.26108e-17	387.159	1.29181	0.201723	6.40391	1.51447e-10	1.73179e-09	387.159	-0.300083	0.282682	-1.06156	0.288437	0.514791	1.3471	1.34609
WBGene00002271	lec-8	R07B1.10	2065.7	7.45386	0.115594	64.4831	0	0	2065.7	0.330092	0.162406	2.03252	0.0421015	0.828301	2065.7	2.21702	0.13862	15.9935	1.41744e-57	1.15062e-55	2065.7	2.51154	0.152315	16.4891	4.39168e-61	1.20153e-58	2065.7	-0.802983	0.212785	-3.77368	0.000160858	0.00265816	2.54711	1.41404
WBGene00002272	lec-9	C16H3.2	1333.61	7.2544	0.105802	68.5657	0	0	1333.61	0.00680479	0.149071	0.0456479	0.963591	0.997702	1333.61	2.33056	0.126942	18.3593	2.7826e-75	4.4685e-73	1333.61	2.14376	0.140006	15.3119	6.36508e-53	1.23734e-50	1333.61	-1.0041	0.195087	-5.14694	2.64763e-07	1.9389e-05	2.33737	1.32646
WBGene00002273	lec-10	W01A11.4	608.113	7.22897	0.11625	62.1847	0	0	608.113	0.481644	0.162869	2.95725	0.00310398	0.605373	608.113	1.41765	0.143193	9.90022	4.15345e-23	5.87769e-22	608.113	1.66104	0.155139	10.7068	9.46216e-27	3.69825e-25	608.113	-1.29071	0.217516	-5.93388	2.95863e-09	5.56302e-07	1.89929	0.126934
WBGene00002274	lec-11	F38A5.3	138.485	4.23622	0.193303	21.9149	1.87196e-106	2.61204e-106	138.485	-0.109045	0.272312	-0.400443	0.68883	0.99478	138.485	1.80935	0.22483	8.04762	8.44177e-16	6.81523e-15	138.485	2.26724	0.254304	8.91548	4.85704e-19	1.17636e-17	138.485	-0.660952	0.352077	-1.8773	0.0604774	0.191727	1.7003	1.1484
WBGene00002275	lem-2	W01G7.5	28.8327	4.92765	0.165388	29.7944	4.6127e-195	8.7235e-195	28.8327	-0.0193255	0.232319	-0.0831851	0.933704	0.995931	28.8327	-1.50788	0.319596	-4.71807	2.38088e-06	6.33101e-06	28.8327	0.719225	0.236277	3.04399	0.00233463	0.00634275	28.8327	-0.148769	0.467834	-0.317996	0.750488	0.866868	-1.5272	-1.65665
WBGene00002276	lem-3	F42H11.2	44.2831	5.89018	0.119083	49.4629	0	0	44.2831	-0.0719767	0.167623	-0.429395	0.667636	0.99478	44.2831	-0.708323	0.262065	-2.70286	0.00687465	0.0105119	44.2831	-0.437536	0.191364	-2.28641	0.0222304	0.0453009	44.2831	0.626888	0.335618	1.86786	0.0617812	0.194309	-0.7803	-0.0814358
WBGene00002278	lep-2	Y55F3AM.6	23.528	5.02296	0.228326	21.9991	2.93892e-107	4.11326e-107	23.528	0.15415	0.320865	0.48042	0.630929	0.99478	23.528	-1.25011	0.425263	-2.93961	0.00328627	0.0052969	23.528	-0.232925	0.331978	-0.701626	0.482912	0.577977	23.528	0.416015	0.574154	0.724571	0.468716	0.674009	-1.09596	-0.834092
WBGene00002280	let-2	F01G12.5	638.938	7.59253	0.118576	64.0307	0	0	638.938	-0.0545774	0.167422	-0.325988	0.744433	0.99478	638.938	1.94111	0.148747	13.0497	6.37632e-39	2.44051e-37	638.938	0.917449	0.160243	5.72537	1.0321e-08	9.20792e-08	638.938	-0.703793	0.223153	-3.15385	0.00161129	0.0145781	1.88653	1.23731
WBGene00002295	let-19	K08F8.6	162.412	7.93107	0.10594	74.864	0	0	162.412	-0.168999	0.149792	-1.12822	0.259226	0.993234	162.412	0.745848	0.172215	4.33093	1.48483e-05	3.49314e-05	162.412	-1.43906	0.161885	-8.88942	6.14296e-19	1.48294e-17	162.412	0.102317	0.230912	0.443102	0.657692	0.810552	0.57685	0.848166
WBGene00002297	ect-2	T19E10.1	81.8298	6.58505	0.141034	46.6913	0	0	81.8298	0.131497	0.198403	0.662776	0.507474	0.99478	81.8298	-1.77852	0.246961	-7.20165	5.94898e-13	3.67127e-12	81.8298	0.348981	0.19665	1.77463	0.0759594	0.128636	81.8298	0.613705	0.339246	1.80903	0.070447	0.211706	-1.64703	-1.16482
WBGene00002299	let-23	ZK1067.1	22.8512	4.87889	0.30694	15.8953	6.83425e-57	8.0198e-57	22.8512	-0.556827	0.436417	-1.2759	0.201989	0.9868	22.8512	2.37986	0.521954	4.55952	5.12716e-06	1.29397e-05	22.8512	-2.32228	0.516787	-4.49368	7.00023e-06	3.59601e-05	22.8512	0.429582	0.63177	0.679966	0.496526	0.695954	1.82303	2.80944
WBGene00002324	let-49	Y54E5B.3	21.2017	5.15892	0.216983	23.7757	5.95848e-125	8.87405e-125	21.2017	-0.0253387	0.305885	-0.0828373	0.933981	0.995931	21.2017	-0.904687	0.451322	-2.00453	0.0450136	0.0601316	21.2017	-0.982064	0.337031	-2.91387	0.00356977	0.00922991	21.2017	0.611604	0.586714	1.04242	0.297215	0.522549	-0.930026	-0.293083
WBGene00002335	let-60	ZK792.6	42.0213	5.35824	0.147397	36.3525	2.39583e-289	6.15156e-289	42.0213	0.0542847	0.206612	0.262738	0.792753	0.99478	42.0213	-0.312745	0.25943	-1.20551	0.228008	0.267221	42.0213	0.151254	0.219989	0.687552	0.491735	0.586262	42.0213	0.193	0.351344	0.54932	0.582786	0.75894	-0.25846	-0.119744
WBGene00002344	let-70	M7.1	317.319	8.00944	0.0835043	95.9165	0	0	317.319	0.0910251	0.117509	0.774621	0.438564	0.99478	317.319	-0.262034	0.119867	-2.18603	0.0288132	0.0396283	317.319	0.546209	0.115697	4.72103	2.34654e-06	1.31917e-05	317.319	0.0226464	0.173189	0.130761	0.895964	0.948872	-0.171009	-0.239387
WBGene00002348	myo-1	R06C7.10	80.9422	6.08651	0.174286	34.9226	3.37163e-267	8.09696e-267	80.9422	-0.148416	0.246325	-0.602518	0.546829	0.99478	80.9422	1.12043	0.24621	4.5507	5.34672e-06	1.34524e-05	80.9422	-0.21844	0.249431	-0.875751	0.381166	0.481065	80.9422	-0.503026	0.353686	-1.42224	0.154957	0.354052	0.972014	0.617404
WBGene00002363	let-92	F38H4.9	160.596	7.41492	0.11902	62.2998	0	0	160.596	0.0808047	0.167723	0.481774	0.629967	0.99478	160.596	-0.123495	0.172975	-0.713948	0.475259	0.519724	160.596	0.0136895	0.166641	0.0821496	0.934528	0.953054	160.596	-0.375734	0.252201	-1.48982	0.136272	0.324672	-0.0426903	-0.499229
WBGene00002368	let-99	K08E7.3	86.4152	6.25801	0.232899	26.8701	4.91178e-159	8.21448e-159	86.4152	-0.0920103	0.329119	-0.279565	0.779811	0.99478	86.4152	-2.054	0.329142	-6.24047	4.36253e-10	1.90799e-09	86.4152	1.08019	0.311706	3.46542	0.000529409	0.00173579	86.4152	1.10738	0.477566	2.3188	0.0204062	0.0898516	-2.14601	-0.946624
WBGene00002583	let-363	B0261.2	109.802	7.02083	0.106033	66.2135	0	0	109.802	-0.046651	0.149473	-0.312103	0.754963	0.99478	109.802	-0.282624	0.1746	-1.6187	0.105512	0.131348	109.802	-0.119075	0.154784	-0.769298	0.441717	0.539957	109.802	-0.223183	0.249185	-0.895653	0.370438	0.594085	-0.329275	-0.505807
WBGene00002632	let-413	F26D11.11	38.8737	5.18201	0.209888	24.6894	1.39079e-134	2.13904e-134	38.8737	-0.0816569	0.296171	-0.275709	0.782772	0.99478	38.8737	1.35258	0.316044	4.27972	1.87129e-05	4.34693e-05	38.8737	-0.536345	0.314287	-1.70654	0.0879068	0.145533	38.8737	-0.888013	0.44583	-1.99182	0.0463908	0.159857	1.27092	0.464568
WBGene00002637	let-418	F26F12.7	169.797	8.039	0.104708	76.7755	0	0	169.797	0.222265	0.147436	1.50753	0.131674	0.965307	169.797	-0.170228	0.175441	-0.970288	0.331903	0.374945	169.797	-1.16481	0.155488	-7.4913	6.81947e-14	1.12195e-12	169.797	-0.081748	0.239704	-0.341037	0.733076	0.857254	0.052037	-0.251976
WBGene00002694	let-502	C10H11.9	115.122	7.36247	0.0965499	76.2557	0	0	115.122	0.00528516	0.135981	0.038867	0.968996	0.998148	115.122	-0.351336	0.175827	-1.99819	0.0456965	0.0609095	115.122	-0.658772	0.146867	-4.4855	7.27432e-06	3.71871e-05	115.122	0.0812769	0.23882	0.340327	0.733611	0.857481	-0.34605	-0.270059
WBGene00002696	let-504	E01A2.4	209.738	8.06081	0.110154	73.1777	0	0	209.738	0.135835	0.155294	0.874701	0.381737	0.99478	209.738	-1.18958	0.171683	-6.92893	4.24033e-12	2.38927e-11	209.738	-0.12784	0.153003	-0.835538	0.403415	0.503298	209.738	0.545461	0.240699	2.26615	0.0234421	0.0990805	-1.05375	-0.644122
WBGene00002717	let-526	C01G8.9	157.066	7.27682	0.0882005	82.5032	0	0	157.066	-0.0422571	0.124235	-0.34014	0.733751	0.99478	157.066	-0.726917	0.148345	-4.90019	9.57453e-07	2.69745e-06	157.066	0.306987	0.126651	2.42388	0.0153558	0.0327651	157.066	0.566486	0.203141	2.78864	0.00529303	0.034479	-0.769174	-0.160431
WBGene00002783	let-607	F57B10.1	200.055	7.27355	0.094721	76.7893	0	0	200.055	0.0257132	0.133285	0.192919	0.847023	0.99478	200.055	-0.223527	0.137764	-1.62253	0.10469	0.13039	200.055	0.695515	0.131778	5.27792	1.3066e-07	9.52799e-07	200.055	-0.141177	0.200543	-0.703976	0.481448	0.683854	-0.197814	-0.364705
WBGene00002804	let-630	Y110A7A.19	37.7028	5.66437	0.152998	37.0226	4.95079e-300	1.31269e-299	37.7028	-0.0434592	0.215497	-0.20167	0.840175	0.99478	37.7028	-0.976488	0.299983	-3.25515	0.00113332	0.00197776	37.7028	-0.213425	0.229556	-0.929731	0.35251	0.45169	37.7028	0.419511	0.403855	1.03877	0.298914	0.523709	-1.01995	-0.556977
WBGene00002845	let-711	F57B9.2	159.008	7.98103	0.0858668	92.9466	0	0	159.008	-0.0616527	0.121162	-0.508845	0.610861	0.99478	159.008	-0.147341	0.157966	-0.932735	0.350957	0.39472	159.008	-1.09715	0.133186	-8.23767	1.75601e-16	3.6747e-15	159.008	0.214147	0.210524	1.01721	0.309052	0.535009	-0.208993	0.0668066
WBGene00002850	let-716	C16A3.3	120.56	7.39776	0.0993034	74.4966	0	0	120.56	-0.0233824	0.13998	-0.167042	0.867337	0.99478	120.56	0.100523	0.172577	0.582482	0.560242	0.598829	120.56	-0.817801	0.151938	-5.38248	7.34685e-08	5.67097e-07	120.56	-0.130849	0.235946	-0.554572	0.579187	0.756554	0.0771406	-0.030326
WBGene00002855	let-721	C05D11.12	99.6269	6.64928	0.149189	44.5695	0	0	99.6269	0.112798	0.210088	0.53691	0.59133	0.99478	99.6269	-0.637484	0.221146	-2.88264	0.00394356	0.00626205	99.6269	0.294996	0.207039	1.42484	0.154205	0.231715	99.6269	0.08316	0.317851	0.261632	0.793605	0.890581	-0.524685	-0.554324
WBGene00002879	let-754	C29E4.8	54.7935	5.57864	0.151279	36.8764	1.1045e-297	2.91286e-297	54.7935	0.461675	0.210315	2.19515	0.0281526	0.792078	54.7935	0.469093	0.240462	1.9508	0.0510808	0.0674051	54.7935	-0.0349566	0.22515	-0.155259	0.876617	0.910675	54.7935	-0.759341	0.333387	-2.27766	0.0227471	0.0972659	0.930768	-0.290248
WBGene00002889	let-765	F20H11.2	90.306	7.24975	0.171475	42.2786	0	0	90.306	0.0225882	0.242135	0.0932879	0.925675	0.995931	90.306	-0.477159	0.272599	-1.75041	0.0800479	0.101968	90.306	-1.21831	0.246162	-4.94921	7.45159e-07	4.66482e-06	90.306	0.411535	0.376776	1.09225	0.274722	0.501221	-0.454571	-0.065624
WBGene00002891	let-767	C56G2.6	200.581	7.63994	0.120649	63.3237	0	0	200.581	0.225876	0.169882	1.32961	0.183648	0.981054	200.581	0.86476	0.169926	5.08903	3.59892e-07	1.07938e-06	200.581	-0.463681	0.171183	-2.70868	0.00675511	0.0160347	200.581	-0.872103	0.24576	-3.5486	0.000387288	0.00498034	1.09064	-0.00734343
WBGene00002915	let-805	H19M22.2	70.7018	6.37703	0.171774	37.1246	1.12732e-301	2.99875e-301	70.7018	-0.368113	0.243607	-1.51109	0.130765	0.965307	70.7018	1.09614	0.253872	4.3177	1.57667e-05	3.69772e-05	70.7018	-0.793789	0.251934	-3.15078	0.00162834	0.00462814	70.7018	-0.54572	0.363888	-1.49969	0.133695	0.321616	0.72803	0.550423
WBGene00002957	let-858	F33A8.1	73.3976	6.41828	0.132713	48.3622	0	0	73.3976	0.105623	0.186523	0.56627	0.57121	0.99478	73.3976	-0.763027	0.221343	-3.44726	0.0005663	0.00103572	73.3976	0.107364	0.190189	0.564512	0.572406	0.659857	73.3976	-0.299023	0.31922	-0.936729	0.348898	0.573691	-0.657404	-1.06205
WBGene00002976	lev-9	T07H6.5	18.1256	5.08905	0.217996	23.3447	1.55959e-120	2.28178e-120	18.1256	-0.439649	0.310151	-1.41753	0.156328	1	18.1256	1.00131	0.427169	2.34406	0.0190752	0.0270509	18.1256	-1.8424	0.380196	-4.84593	1.26021e-06	7.48925e-06	18.1256	-0.644576	0.587778	-1.09663	0.272802	0.49893	0.561659	0.356733
WBGene00002977	NA	NA	26.392	5.60028	0.327063	17.1229	1.00133e-65	1.20804e-65	26.392	-0.697219	0.464473	-1.5011	0.13333	0.965307	26.392	0.584428	0.487762	1.19818	0.230846	0.270119	26.392	-1.58164	0.474184	-3.33549	0.000851491	0.00262191	26.392	0.275599	0.692786	0.397812	0.690769	0.832296	-0.112791	0.860027
WBGene00002978	lev-11	Y105E8B.1	711.619	8.19067	0.130554	62.7378	0	0	711.619	-0.0187301	0.184427	-0.101558	0.919107	0.995166	711.619	1.53354	0.162935	9.41194	4.87066e-21	5.94704e-20	711.619	0.826452	0.175007	4.7224	2.33073e-06	1.31128e-05	711.619	-0.984511	0.24679	-3.98926	6.62788e-05	0.00134041	1.51481	0.549025
WBGene00002979	lfe-2	C46H11.4	38.3074	4.8876	0.187978	26.0009	4.83179e-149	7.82215e-149	38.3074	-0.144616	0.265468	-0.54476	0.585918	0.99478	38.3074	1.54431	0.285803	5.40342	6.53838e-08	2.19741e-07	38.3074	-0.209566	0.285859	-0.733109	0.463492	0.560454	38.3074	-1.11009	0.406891	-2.72822	0.00636776	0.039554	1.39969	0.434223
WBGene00002980	lgg-1	C32D5.9	224.727	7.34821	0.0988777	74.3161	0	0	224.727	0.0621842	0.139129	0.446954	0.654908	0.99478	224.727	0.774363	0.140978	5.49279	3.9564e-08	1.36506e-07	224.727	0.137706	0.140891	0.977395	0.328374	0.427511	224.727	-0.218412	0.199989	-1.09212	0.274782	0.501221	0.836547	0.555951
WBGene00002981	lgg-2	ZK593.6	119.604	6.37704	0.136302	46.786	0	0	119.604	0.259615	0.191069	1.35875	0.174226	0.977785	119.604	0.605706	0.194395	3.11586	0.00183411	0.00308975	119.604	0.252393	0.193247	1.30606	0.191531	0.276816	119.604	-0.284894	0.275473	-1.0342	0.301043	0.526087	0.865321	0.320812
WBGene00002982	lgg-3	B0336.8	30.9512	4.55166	0.213337	21.3355	5.31171e-101	7.25413e-101	30.9512	-0.118816	0.301043	-0.394681	0.693078	0.99478	30.9512	-2.7679	0.412688	-6.70699	1.98683e-11	1.02706e-10	30.9512	1.50306	0.288452	5.21078	1.88051e-07	1.33957e-06	30.9512	1.68246	0.540999	3.10992	0.0018714	0.0161871	-2.88671	-1.08543
WBGene00002985	lig-1	C29A12.3	97.3465	7.15027	0.141675	50.4697	0	0	97.3465	-0.0459704	0.200031	-0.229817	0.818234	0.99478	97.3465	-1.73399	0.248097	-6.98916	2.76533e-12	1.58845e-11	97.3465	-0.221016	0.198819	-1.11164	0.266293	0.361799	97.3465	0.938974	0.337438	2.78265	0.00539165	0.0348928	-1.77996	-0.795017
WBGene00002986	lig-4	C07H6.1	30.8057	5.21006	0.262174	19.8725	7.03423e-88	9.1919e-88	30.8057	-0.06767	0.370193	-0.182797	0.854958	0.99478	30.8057	0.391264	0.385514	1.01491	0.310146	0.352795	30.8057	-0.450052	0.374951	-1.20029	0.230025	0.321148	30.8057	-0.545624	0.559852	-0.974585	0.329766	0.555627	0.323594	-0.15436
WBGene00002990	lin-1	C37F5.1	12.4208	2.80681	0.403575	6.95486	3.52911e-12	3.60275e-12	12.4208	-0.537827	0.577695	-0.930988	0.35186	1	12.4208	1.8776	0.578967	3.24302	0.00118269	0.0020576	12.4208	-0.0144062	0.597175	-0.024124	0.980754	0.986765	12.4208	-0.210762	0.809937	-0.26022	0.794694	1	1.33978	1.66684
WBGene00002994	lin-5	T09A5.10	96.7499	6.72805	0.086038	78.1986	0	0	96.7499	0.0361776	0.120539	0.300131	0.764077	0.99478	96.7499	-1.40055	0.181565	-7.7138	1.2213e-14	8.906e-14	96.7499	0.349754	0.127524	2.74264	0.00609465	0.0147417	96.7499	0.773392	0.236745	3.26678	0.0010878	0.0109678	-1.36437	-0.627159
WBGene00002997	lin-8	B0454.1	18.5908	4.9606	0.239083	20.7484	1.26695e-95	1.7004e-95	18.5908	-0.119665	0.337685	-0.354369	0.723062	1	18.5908	0.0821205	0.42616	0.192699	0.847195	0.865233	18.5908	-1.02478	0.37028	-2.76759	0.00564721	0.0137858	18.5908	-1.12348	0.653668	-1.71873	0.085663	0.239851	-0.0375448	-1.04136
WBGene00002998	lin-9	ZK637.7	41.8312	5.87772	0.188448	31.1901	1.45015e-213	2.89286e-213	41.8312	0.104328	0.265324	0.39321	0.694164	0.99478	41.8312	-1.41658	0.356844	-3.96974	7.19503e-05	0.000152335	41.8312	-0.455028	0.273613	-1.66304	0.0963048	0.156387	41.8312	1.09449	0.463873	2.35947	0.0183012	0.0831078	-1.31225	-0.322086
WBGene00002999	lin-10	C09H6.2	29.7847	4.8127	0.202365	23.7823	5.09553e-125	7.59038e-125	29.7847	-0.0286939	0.284876	-0.100724	0.91977	0.995166	29.7847	0.649384	0.326703	1.98769	0.0468463	0.0623407	29.7847	-0.276447	0.306484	-0.901994	0.36706	0.46653	29.7847	-0.144309	0.444486	-0.324664	0.745435	0.864171	0.62069	0.505076
WBGene00003002	lin-13	C03B8.4	142.688	7.49333	0.11275	66.4596	0	0	142.688	-0.0263964	0.159085	-0.165927	0.868214	0.99478	142.688	-0.970191	0.180378	-5.37865	7.50481e-08	2.50172e-07	142.688	-0.0210414	0.158583	-0.132684	0.894443	0.922538	142.688	0.300486	0.255209	1.17741	0.23903	0.460126	-0.996587	-0.669704
WBGene00003006	lin-17	Y71F9B.5	16.6848	4.95141	0.219714	22.5357	1.85616e-112	2.63732e-112	16.6848	-0.474795	0.313057	-1.51664	0.129357	1	16.6848	0.82406	0.461393	1.78603	0.0740951	0.0949914	16.6848	-1.95185	0.396521	-4.92244	8.54713e-07	5.27906e-06	16.6848	0.319208	0.571953	0.558101	0.576775	0.754962	0.349265	1.14327
WBGene00003007	lin-18	C16B8.1	17.4489	3.83357	0.210841	18.1823	7.12401e-74	8.8669e-74	17.4489	-0.217627	0.298641	-0.728725	0.46617	1	17.4489	1.46677	0.374835	3.9131	9.11193e-05	0.000188649	17.4489	-0.450126	0.355684	-1.26552	0.205684	0.293602	17.4489	-0.281921	0.478446	-0.589243	0.555698	0.741037	1.24914	1.18485
WBGene00003009	lin-23	K10B2.1	89.2226	6.75399	0.10261	65.8222	0	0	89.2226	-0.149532	0.144948	-1.03163	0.302247	0.99478	89.2226	-1.29183	0.203817	-6.33819	2.32486e-10	1.05555e-09	89.2226	0.0341166	0.151239	0.22558	0.821528	0.869182	89.2226	1.19435	0.263788	4.52769	5.96317e-06	0.000204364	-1.44136	-0.0974789
WBGene00003010	lin-24	B0001.1	49.5683	4.99688	0.166691	29.9769	1.96324e-197	3.74354e-197	49.5683	0.141949	0.232969	0.609305	0.542323	0.99478	49.5683	-1.37109	0.268672	-5.1032	3.33951e-07	1.0069e-06	49.5683	1.37911	0.227653	6.05794	1.37877e-09	1.40289e-08	49.5683	0.659729	0.374262	1.76275	0.0779434	0.225631	-1.22914	-0.71136
WBGene00003011	lin-25	F56H9.5	18.1858	5.11585	0.226164	22.6201	2.74803e-113	3.92417e-113	18.1858	-0.0540173	0.319046	-0.169309	0.865554	1	18.1858	0.728964	0.50969	1.43021	0.152657	0.184381	18.1858	-2.42607	0.425371	-5.70341	1.17431e-08	1.03516e-07	18.1858	0.37132	0.596234	0.622776	0.533432	0.724538	0.674947	1.10028
WBGene00003012	lin-26	F18A1.2	61.6739	5.99958	0.126639	47.3753	0	0	61.6739	0.0999066	0.177491	0.562882	0.573515	0.99478	61.6739	-1.37259	0.231965	-5.91724	3.27398e-09	1.29331e-08	61.6739	0.584971	0.180271	3.24496	0.00117467	0.0034751	61.6739	0.188451	0.323886	0.581843	0.560673	0.7451	-1.27269	-1.18414
WBGene00003020	lin-35	C32F10.2	54.4127	6.23847	0.127017	49.115	0	0	54.4127	0.1423	0.178098	0.798997	0.424292	0.99478	54.4127	-1.53914	0.280286	-5.49131	3.98974e-08	1.37528e-07	54.4127	-0.285531	0.191345	-1.49223	0.135639	0.20779	54.4127	0.935117	0.355622	2.62953	0.0085504	0.0488384	-1.39684	-0.604021
WBGene00003021	lin-36	F44B9.6	50.8379	6.07676	0.137034	44.345	0	0	50.8379	0.0748512	0.192506	0.388826	0.697405	0.99478	50.8379	-2.20216	0.316565	-6.95642	3.49026e-12	1.98363e-11	50.8379	0.0512223	0.199789	0.256382	0.797656	0.851228	50.8379	1.26362	0.398842	3.16821	0.00153379	0.0141145	-2.12731	-0.93854
WBGene00003022	lin-37	ZK418.4	43.6964	5.65495	0.133766	42.2748	0	0	43.6964	0.0637666	0.187466	0.34015	0.733743	0.99478	43.6964	-2.69659	0.352468	-7.6506	2.00039e-14	1.4291e-13	43.6964	0.4781	0.193708	2.46815	0.0135814	0.0294643	43.6964	1.68036	0.427829	3.92765	8.578e-05	0.00163877	-2.63282	-1.01623
WBGene00003025	lin-40	T27C4.4	91.5162	6.84581	0.13529	50.601	0	0	91.5162	-0.0937416	0.191046	-0.490676	0.623655	0.99478	91.5162	-0.629358	0.217408	-2.89483	0.00379368	0.00604354	91.5162	-0.192153	0.193057	-0.995316	0.319583	0.418808	91.5162	0.397274	0.303755	1.30788	0.190916	0.402416	-0.723099	-0.232084
WBGene00003026	lin-41	C12C8.3	138.034	7.80742	0.100291	77.848	0	0	138.034	-0.0721249	0.141592	-0.509387	0.610481	0.99478	138.034	-1.49981	0.194812	-7.69878	1.37376e-14	9.96852e-14	138.034	-0.608209	0.146241	-4.15895	3.19714e-05	0.000141336	138.034	0.94378	0.257252	3.6687	0.00024379	0.00353343	-1.57194	-0.556031
WBGene00003030	lin-45	Y73B6A.5	131.11	6.92951	0.141463	48.9846	0	0	131.11	-0.132993	0.199912	-0.665257	0.505886	0.99478	131.11	-0.95281	0.202675	-4.70116	2.58687e-06	6.84672e-06	131.11	0.702273	0.192808	3.64235	0.000270161	0.000954412	131.11	0.320142	0.29681	1.07861	0.280763	0.506295	-1.0858	-0.632668
WBGene00003034	lin-49	F42A9.2	56.8757	6.10012	0.154151	39.5723	0	0	56.8757	-0.0151148	0.217245	-0.069575	0.944532	0.996435	56.8757	-1.12056	0.261746	-4.28109	1.85976e-05	4.32286e-05	56.8757	0.180986	0.218754	0.827351	0.408038	0.507865	56.8757	0.143898	0.371382	0.387467	0.698411	0.83734	-1.13567	-0.976661
WBGene00003035	lin-52	ZK632.13	33.227	4.86985	0.244168	19.9447	1.66629e-88	2.18049e-88	33.227	0.301454	0.342409	0.880389	0.378649	0.99478	33.227	-2.17235	0.404271	-5.37351	7.72172e-08	2.56476e-07	33.227	1.10754	0.331378	3.34222	0.000831125	0.00256669	33.227	0.60909	0.562212	1.08338	0.278639	0.504815	-1.8709	-1.56326
WBGene00003036	lin-53	K07A1.12	141.628	7.39172	0.159581	46.3197	0	0	141.628	0.16291	0.225106	0.723702	0.469248	0.99478	141.628	-1.87246	0.239897	-7.80529	5.93655e-15	4.44309e-14	141.628	0.333551	0.216497	1.54067	0.123396	0.192265	141.628	0.681369	0.341763	1.99369	0.0461859	0.159541	-1.70955	-1.19109
WBGene00003037	lin-54	JC8.6	48.6816	5.95251	0.153941	38.6676	0	0	48.6816	-0.0794337	0.217169	-0.365769	0.714538	0.99478	48.6816	-2.15409	0.320603	-6.71888	1.83123e-11	9.51288e-11	48.6816	0.223092	0.219353	1.01705	0.30913	0.407994	48.6816	1.37985	0.41336	3.33812	0.000843472	0.00899659	-2.23353	-0.774246
WBGene00003038	lin-56	ZK673.3	22.8609	5.28631	0.171341	30.8526	5.16751e-209	1.02011e-208	22.8609	-0.0325245	0.241223	-0.134831	0.892745	0.995157	22.8609	-0.551451	0.389346	-1.41635	0.156673	0.188707	22.8609	-1.08106	0.285517	-3.78631	0.000152903	0.000570738	22.8609	0.350998	0.501494	0.699904	0.483987	0.685826	-0.583976	-0.200454
WBGene00003040	lin-59	T12F5.4	62.1423	6.11393	0.120618	50.6881	0	0	62.1423	-0.0571022	0.169839	-0.336214	0.73671	0.99478	62.1423	0.996512	0.223217	4.46432	8.03229e-06	1.9719e-05	62.1423	-0.973239	0.202499	-4.80614	1.5387e-06	8.94989e-06	62.1423	0.11672	0.278041	0.419795	0.674635	0.821925	0.93941	1.11323
WBGene00003041	lin-61	R06C7.7	54.9648	6.03511	0.112357	53.7138	0	0	54.9648	0.0368831	0.157487	0.234198	0.814831	0.99478	54.9648	-0.935638	0.230301	-4.06268	4.85128e-05	0.0001058	54.9648	0.0308353	0.171113	0.180204	0.856992	0.897189	54.9648	0.356966	0.306938	1.16299	0.244833	0.466643	-0.898755	-0.578672
WBGene00003043	lip-1	C05B10.1	59.1391	5.92627	0.146611	40.4217	0	0	59.1391	0.0360264	0.206187	0.174727	0.861294	0.99478	59.1391	-1.50462	0.265144	-5.67474	1.389e-08	5.06692e-08	59.1391	0.448647	0.207474	2.16242	0.0305859	0.0596482	59.1391	0.990407	0.353728	2.79991	0.00511168	0.033713	-1.4686	-0.514216
WBGene00003044	lir-1	F18A1.3	55.3857	5.58409	0.120632	46.2904	0	0	55.3857	-0.0718328	0.169632	-0.423461	0.671959	0.99478	55.3857	-1.41713	0.233842	-6.06019	1.35963e-09	5.62035e-09	55.3857	0.845942	0.172567	4.9021	9.48167e-07	5.78852e-06	55.3857	0.913977	0.310843	2.94031	0.0032788	0.0246868	-1.48896	-0.503151
WBGene00003045	lir-2	F18A1.4	19.5119	5.05543	0.196593	25.7151	7.9139e-146	1.26729e-145	19.5119	-0.263019	0.278625	-0.943991	0.345174	1	19.5119	0.0370019	0.420572	0.0879799	0.929893	0.939816	19.5119	-1.38906	0.335226	-4.14366	3.41803e-05	0.000150292	19.5119	0.532517	0.530266	1.00425	0.31526	0.541147	-0.226018	0.569519
WBGene00003047	lis-1	T03F6.5	44.9351	5.74713	0.126557	45.4115	0	0	44.9351	-0.202046	0.179083	-1.12823	0.259224	0.993234	44.9351	-0.00499937	0.240909	-0.0207521	0.983443	0.985712	44.9351	-0.358616	0.200672	-1.78708	0.0739249	0.125739	44.9351	0.225017	0.321198	0.700557	0.48358	0.685605	-0.207046	0.220018
WBGene00003048	lit-1	W06F12.1	49.4607	6.0751	0.120336	50.4845	0	0	49.4607	-0.129479	0.169834	-0.762389	0.445828	0.99478	49.4607	-0.795178	0.240875	-3.3012	0.000962713	0.00169687	49.4607	-0.186819	0.184028	-1.01517	0.310026	0.408711	49.4607	0.0693066	0.33526	0.206725	0.836225	0.915015	-0.924658	-0.725872
WBGene00003052	lmn-1	DY3.2	153.503	7.27151	0.085803	84.7466	0	0	153.503	0.138266	0.120247	1.14984	0.250208	0.993234	153.503	-0.571671	0.145745	-3.92241	8.76666e-05	0.000182472	153.503	0.21485	0.124606	1.72424	0.0846654	0.141084	153.503	0.129311	0.200872	0.643752	0.519736	0.715483	-0.433405	-0.442359
WBGene00003053	lmp-1	C03B1.12	256.464	7.87125	0.135824	57.9519	0	0	256.464	0.18316	0.191575	0.956075	0.339034	0.99478	256.464	1.71842	0.184278	9.32514	1.10841e-20	1.3292e-19	256.464	-0.847508	0.191741	-4.42007	9.86712e-06	4.88201e-05	256.464	-1.14789	0.266722	-4.30369	1.6798e-05	0.000454813	1.90158	0.570532
WBGene00003055	lon-1	F48E8.1	170.806	4.8499	0.143593	33.7752	4.56003e-250	1.02886e-249	170.806	0.231963	0.198642	1.16774	0.24291	0.993234	170.806	2.60746	0.18162	14.3567	9.67413e-47	5.29354e-45	170.806	1.16754	0.201906	5.7826	7.35531e-09	6.76634e-08	170.806	-0.812211	0.259106	-3.13467	0.00172045	0.0153254	2.83943	1.79525
WBGene00003056	lon-2	C39E6.1	33.9967	4.81972	0.23705	20.3321	6.68498e-92	8.85458e-92	33.9967	-0.187359	0.335252	-0.55886	0.576257	0.99478	33.9967	2.15026	0.36999	5.81168	6.18501e-09	2.3563e-08	33.9967	-1.03436	0.373182	-2.77174	0.00557579	0.0136385	33.9967	-0.556371	0.486044	-1.14469	0.252337	0.475232	1.96291	1.59389
WBGene00003058	lov-1	ZK945.9	23.8171	5.84188	0.221883	26.3287	9.00823e-153	1.47384e-152	23.8171	-0.465221	0.315002	-1.47688	0.139707	0.968704	23.8171	0.220369	0.487928	0.451643	0.651526	0.684087	23.8171	-2.68971	0.392305	-6.85616	7.07365e-12	9.69444e-11	23.8171	0.789126	0.599264	1.31683	0.187897	0.398173	-0.244852	1.0095
WBGene00003059	lpd-2	C48E7.3	36.9185	6.04356	0.128695	46.9603	0	0	36.9185	-0.0160593	0.181057	-0.0886977	0.929322	0.995931	36.9185	-1.26193	0.342296	-3.68667	0.000227205	0.00044507	36.9185	-1.0564	0.215511	-4.90183	9.49487e-07	5.79179e-06	36.9185	0.78782	0.427469	1.84299	0.0653312	0.202004	-1.27799	-0.474115
WBGene00003060	lpd-3	Y47G6A.23	126.949	7.67323	0.120083	63.8993	0	0	126.949	-0.309789	0.17009	-1.82133	0.0685571	0.914441	126.949	0.070658	0.194699	0.362909	0.716673	0.743966	126.949	-1.14396	0.177684	-6.43816	1.20928e-10	1.40456e-09	126.949	0.378615	0.267689	1.41438	0.157249	0.35765	-0.239131	0.449273
WBGene00003061	lpd-5	ZK973.10	75.9928	6.1704	0.125696	49.0899	0	0	75.9928	-0.112242	0.177362	-0.632838	0.52684	0.99478	75.9928	0.286724	0.199216	1.43926	0.150075	0.18162	75.9928	0.0393251	0.185162	0.212383	0.831808	0.877252	75.9928	-0.20979	0.281167	-0.74614	0.455583	0.663195	0.174483	0.076934
WBGene00003062	lpd-6	K09H9.6	67.8367	6.08681	0.115846	52.542	0	0	67.8367	0.154569	0.161898	0.954731	0.339714	0.99478	67.8367	-0.621924	0.212927	-2.92083	0.00349097	0.00559753	67.8367	0.139705	0.172694	0.808977	0.418528	0.517781	67.8367	0.384493	0.282718	1.35999	0.173834	0.380064	-0.467355	-0.237431
WBGene00003063	lpd-7	R13A5.12	203.478	7.28212	0.088806	82.0003	0	0	203.478	-0.253389	0.125837	-2.01362	0.044049	0.83814	203.478	-0.369576	0.131487	-2.81075	0.00494266	0.00771912	203.478	0.794308	0.123594	6.42674	1.30371e-10	1.51185e-09	203.478	0.33913	0.190098	1.78397	0.0744279	0.218941	-0.622965	-0.0304454
WBGene00003064	lpd-8	R10H10.1	56.7338	5.90162	0.121177	48.7024	0	0	56.7338	0.0681292	0.169755	0.401339	0.688171	0.99478	56.7338	-0.80288	0.225177	-3.56555	0.00036309	0.000687195	56.7338	0.26975	0.179098	1.50616	0.132025	0.203393	56.7338	0.213323	0.307226	0.694352	0.487461	0.688022	-0.734751	-0.589557
WBGene00003065	lpd-9	T21C9.5	68.919	6.04431	0.113	53.4897	0	0	68.919	0.124633	0.157923	0.789201	0.429994	0.99478	68.919	-0.0870456	0.195066	-0.446238	0.655426	0.687438	68.919	0.160009	0.169463	0.94421	0.345062	0.444537	68.919	-0.212655	0.269498	-0.789077	0.430067	0.644335	0.037587	-0.299701
WBGene00003066	lpl-1	ZC410.7	23.5737	4.76976	0.218074	21.8722	4.77656e-106	6.65117e-106	23.5737	0.00198097	0.306924	0.00645425	0.99485	0.998148	23.5737	-0.230892	0.370275	-0.623569	0.532911	0.572848	23.5737	-0.175256	0.3232	-0.542252	0.587645	0.674163	23.5737	0.153449	0.506909	0.302715	0.762107	0.873185	-0.228911	-0.077443
WBGene00003067	lrg-1	F55H2.4	14.1088	3.62985	0.282555	12.8465	8.99902e-38	9.90402e-38	14.1088	-0.22938	0.400202	-0.57316	0.566537	1	14.1088	-2.23652	0.549261	-4.07186	4.6639e-05	0.000101839	14.1088	1.1022	0.39023	2.82448	0.00473568	0.0118264	14.1088	1.51942	0.723982	2.09869	0.035844	1	-2.4659	-0.717101
WBGene00003068	lrk-1	T27C10.6	34.7814	5.80787	0.15191	38.2323	0	0	34.7814	-0.254378	0.215241	-1.18183	0.237274	0.993234	34.7814	0.998374	0.327086	3.05233	0.00227073	0.00376433	34.7814	-1.94481	0.283027	-6.87147	6.35437e-12	8.79021e-11	34.7814	0.502755	0.381515	1.31779	0.187575	0.397939	0.743996	1.50113
WBGene00003071	lrp-1	F29D11.1	132.36	6.98293	0.101262	68.9587	0	0	132.36	-0.207491	0.14329	-1.44805	0.147604	0.971166	132.36	1.73094	0.167566	10.3299	5.16203e-25	8.62714e-24	132.36	-1.01391	0.163846	-6.18821	6.08498e-10	6.44903e-09	132.36	-0.27444	0.215939	-1.27091	0.203759	0.419518	1.52345	1.4565
WBGene00003072	lrp-2	T21E3.3	133.878	7.77498	0.108568	71.6137	0	0	133.878	-0.361159	0.153932	-2.34622	0.0189649	0.763614	133.878	1.3691	0.18376	7.45049	9.29957e-14	6.21683e-13	133.878	-1.88015	0.175066	-10.7397	6.62772e-27	2.6042e-25	133.878	-0.362943	0.244331	-1.48546	0.137422	0.326853	1.00794	1.00616
WBGene00003073	lars-1	R74.1	136.64	6.87593	0.0890805	77.1878	0	0	136.64	0.0400589	0.124975	0.320535	0.748563	0.99478	136.64	0.634839	0.143448	4.42557	9.61869e-06	2.32809e-05	136.64	-0.0184394	0.134578	-0.137017	0.891018	0.920423	136.64	-0.415208	0.198321	-2.09361	0.0362943	0.135534	0.674898	0.21963
WBGene00003074	lars-2	ZK524.3	37.6842	5.73298	0.164107	34.9343	2.24189e-267	5.38564e-267	37.6842	-0.105095	0.231635	-0.45371	0.650037	0.99478	37.6842	-0.637666	0.3134	-2.03467	0.0418843	0.0561727	37.6842	-0.592135	0.250012	-2.36843	0.0178637	0.0374458	37.6842	0.770177	0.408705	1.88443	0.0595064	0.18927	-0.742761	0.132511
WBGene00003076	lsm-1	F40F8.9	44.6699	5.37672	0.219059	24.5447	4.929e-133	7.53372e-133	44.6699	-0.0798949	0.30924	-0.258359	0.79613	0.99478	44.6699	-0.626423	0.318144	-1.96899	0.0489541	0.0649585	44.6699	0.582483	0.301799	1.93004	0.0536023	0.0966228	44.6699	0.0650709	0.465343	0.139834	0.888791	0.94633	-0.706318	-0.561352
WBGene00003077	lsm-3	Y62E10A.12	36.6916	5.42238	0.155	34.9832	4.05435e-268	9.75235e-268	36.6916	-0.00755685	0.217937	-0.0346745	0.972339	0.998148	36.6916	-0.907665	0.303012	-2.99547	0.00274018	0.00448123	36.6916	-0.0712299	0.232882	-0.305863	0.759709	0.821665	36.6916	0.788213	0.39451	1.99795	0.0457217	0.158384	-0.915222	-0.119452
WBGene00003079	lsm-5	F28F8.3	51.547	5.49098	0.148201	37.051	1.73015e-300	4.59089e-300	51.547	0.180928	0.20715	0.873418	0.382435	0.99478	51.547	-0.748691	0.240817	-3.10896	0.00187748	0.00315634	51.547	0.738519	0.209239	3.52955	0.000416271	0.00139709	51.547	-0.269206	0.347438	-0.774831	0.438439	0.649398	-0.567763	-1.0179
WBGene00003080	lsm-6	Y71G12B.14	14.0327	3.46144	0.227086	15.2428	1.8369e-52	2.11654e-52	14.0327	0.306345	0.312707	0.979654	0.327257	1	14.0327	-0.368114	0.394858	-0.932271	0.351196	0.394929	14.0327	0.745266	0.332968	2.23826	0.0252044	0.0504156	14.0327	-0.631053	0.568639	-1.10976	0.267102	1	-0.0617692	-0.999167
WBGene00003081	lsm-7	ZK593.7	31.4162	5.06844	0.141434	35.836	3.0403e-281	7.62864e-281	31.4162	0.035567	0.197831	0.179784	0.857322	0.99478	31.4162	-1.47918	0.311054	-4.75539	1.98067e-06	5.33208e-06	31.4162	0.45428	0.210545	2.15764	0.0309556	0.060176	31.4162	0.816938	0.4025	2.02966	0.0423912	0.150621	-1.44361	-0.662244
WBGene00003082	lsm-8	Y73B6BL.32	28.3538	5.02788	0.197177	25.4993	2.00493e-143	3.18161e-143	28.3538	0.00725118	0.277446	0.0261354	0.979149	0.998148	28.3538	-0.858884	0.343437	-2.50085	0.0123896	0.0181376	28.3538	0.163608	0.285027	0.574011	0.565961	0.654674	28.3538	0.0821705	0.482646	0.17025	0.864814	0.932937	-0.851633	-0.776714
WBGene00003083	lst-1	T22A3.3	76.9147	6.55582	0.123378	53.1358	0	0	76.9147	0.261613	0.172825	1.51375	0.13009	0.965307	76.9147	-2.44936	0.268177	-9.13336	6.64049e-20	7.61697e-19	76.9147	0.343748	0.174763	1.96694	0.0491905	0.0898097	76.9147	0.914056	0.347134	2.63315	0.00845975	0.0486401	-2.18775	-1.53531
WBGene00003084	lst-2	R160.7	29.0726	5.18146	0.167075	31.0127	3.63668e-211	7.22155e-211	29.0726	-0.293028	0.23718	-1.23547	0.216656	0.993234	29.0726	0.890397	0.311063	2.86244	0.00420396	0.00664556	29.0726	-0.957428	0.279594	-3.42435	0.000616261	0.00198185	29.0726	-0.0539788	0.404229	-0.133535	0.89377	0.948328	0.597369	0.836418
WBGene00003085	ccar-1	Y37A1B.1	331.326	8.89341	0.0923566	96.2942	0	0	331.326	0.042468	0.130374	0.325741	0.74462	0.99478	331.326	-0.977206	0.141263	-6.91763	4.5927e-12	2.57212e-11	331.326	-0.450693	0.128594	-3.50478	0.000456979	0.00152127	331.326	0.405259	0.200192	2.02435	0.0429346	0.152008	-0.934738	-0.571947
WBGene00003086	lst-4	Y37A1B.2	74.7559	6.02527	0.129422	46.5552	0	0	74.7559	0.0167148	0.181908	0.0918862	0.926788	0.995931	74.7559	-1.98524	0.240371	-8.25909	1.46785e-16	1.25208e-15	74.7559	0.958116	0.179447	5.33928	9.33181e-08	7.00549e-07	74.7559	1.36139	0.316498	4.30143	1.69702e-05	0.000455838	-1.96853	-0.623852
WBGene00003087	lsy-2	F49H12.1	20.7084	5.10077	0.227091	22.4613	9.91668e-112	1.40658e-111	20.7084	-0.18525	0.321155	-0.576823	0.564059	0.99478	20.7084	1.06702	0.452094	2.36017	0.0182664	0.0259938	20.7084	-2.06296	0.402221	-5.12892	2.91403e-07	2.00253e-06	20.7084	0.270646	0.54531	0.496316	0.619671	0.78703	0.88177	1.33767
WBGene00003090	lys-1	Y22F5A.4	1616.95	7.19047	0.144641	49.7126	0	0	1616.95	0.32665	0.203534	1.60489	0.108518	0.954102	1616.95	3.0231	0.17549	17.2267	1.67564e-66	1.96476e-64	1616.95	1.89141	0.191919	9.85522	6.50765e-23	1.98645e-21	1616.95	-1.4085	0.267503	-5.26538	1.39901e-07	1.13173e-05	3.34975	1.6146
WBGene00003091	lys-2	Y22F5A.5	2531.92	6.64364	0.190793	34.8211	1.16538e-265	2.78147e-265	2531.92	0.22472	0.26889	0.835734	0.403305	0.99478	2531.92	2.63404	0.228651	11.5199	1.04707e-30	2.65797e-29	2531.92	3.55131	0.25053	14.1752	1.30466e-45	1.60625e-43	2531.92	-1.61149	0.352766	-4.56814	4.92065e-06	0.000177373	2.85876	1.02256
WBGene00003093	lys-4	F58B3.1	133.916	7.84723	0.158346	49.5576	0	0	133.916	0.0445625	0.223646	0.199255	0.842064	0.99478	133.916	2.82945	0.310426	9.11473	7.88636e-20	9.0041e-19	133.916	-4.17448	0.302977	-13.7782	3.44598e-43	3.48704e-41	133.916	0.681334	0.325593	2.0926	0.0363852	0.135728	2.87401	3.51078
WBGene00003095	lys-6	F58B3.3	27.4357	4.36588	0.249046	17.5304	8.39971e-69	1.02424e-68	27.4357	-0.627482	0.357166	-1.75684	0.0789455	0.94474	27.4357	3.15611	0.431172	7.31984	2.48263e-13	1.60028e-12	27.4357	-1.58449	0.437891	-3.61846	0.000296364	0.00103266	27.4357	-0.439814	0.514154	-0.855413	0.392323	0.612477	2.52863	2.71629
WBGene00003096	lys-7	C02A12.4	1036.69	4.56352	0.189958	24.0239	1.56639e-127	2.3542e-127	1036.69	-0.458333	0.271908	-1.68562	0.091869	0.954102	1036.69	1.84916	0.207352	8.91799	4.74816e-19	5.06127e-18	1036.69	4.54829	0.240705	18.8957	1.23627e-79	7.02489e-77	1036.69	0.524426	0.341005	1.53788	0.124077	0.305383	1.39083	2.37359
WBGene00003097	lys-8	C17G10.5	618.722	6.52397	0.139829	46.6567	0	0	618.722	-0.147786	0.197605	-0.747886	0.454529	0.99478	618.722	1.84777	0.168506	10.9656	5.59106e-28	1.13777e-26	618.722	2.15439	0.185001	11.6453	2.4256e-31	1.26182e-29	618.722	-0.796145	0.259617	-3.06661	0.00216499	0.0180381	1.69999	1.05163
WBGene00003107	mab-10	R166.1	13.7544	4.50743	0.338204	13.3275	1.60085e-40	1.77613e-40	13.7544	-0.340827	0.479361	-0.711002	0.477083	1	13.7544	0.49498	0.548603	0.902255	0.366921	0.410425	13.7544	-1.22863	0.510282	-2.40775	0.0160512	0.0340426	13.7544	-0.751986	0.8066	-0.932292	0.351186	1	0.154153	-0.257007
WBGene00003112	mab-21	F35G12.6	10.6392	2.74374	0.427597	6.41665	1.39306e-10	1.41646e-10	10.6392	-0.562025	0.612115	-0.91817	0.35853	1	10.6392	1.38171	0.60683	2.27693	0.0227901	0.0319391	10.6392	0.172877	0.619356	0.279123	0.78015	0.83825	10.6392	-0.0543057	0.866858	-0.0626466	0.950048	1	0.819686	1.32741
WBGene00003119	mac-1	Y48C3A.7	32.0076	4.82459	0.154089	31.3105	3.35575e-215	6.74161e-215	32.0076	-0.0979739	0.216908	-0.451684	0.651497	0.99478	32.0076	-0.216897	0.273767	-0.792271	0.428203	0.47324	32.0076	0.366698	0.231467	1.58423	0.11314	0.178632	32.0076	0.168488	0.375194	0.449068	0.653383	0.808535	-0.314871	-0.0484095
WBGene00003123	mag-1	R09B3.5	58.9291	5.61931	0.172422	32.5905	5.59528e-233	1.18669e-232	58.9291	0.314283	0.241345	1.30221	0.192844	0.981054	58.9291	-0.850251	0.261895	-3.24653	0.00116819	0.00203477	58.9291	0.771131	0.238466	3.23371	0.00122193	0.00359905	58.9291	-0.188934	0.377799	-0.500092	0.61701	0.785029	-0.535969	-1.03919
WBGene00003124	mai-1	K10B3.9	21.9373	4.35605	0.27528	15.8241	2.12364e-56	2.48531e-56	21.9373	-0.207279	0.389498	-0.532169	0.594609	0.99478	21.9373	1.85595	0.418067	4.43935	9.02329e-06	2.19766e-05	21.9373	-0.739766	0.421466	-1.75522	0.0792213	0.133579	21.9373	-1.43101	0.598685	-2.39026	0.0168367	0.0787669	1.64867	0.424936
WBGene00003129	map-1	Y37E11AL.7	35.5114	4.79026	0.17381	27.5603	3.33206e-167	5.7335e-167	35.5114	0.460305	0.240347	1.91516	0.0554715	0.887687	35.5114	0.0247096	0.278164	0.088831	0.929216	0.93939	35.5114	0.478467	0.25319	1.88976	0.0587907	0.104321	35.5114	-0.670796	0.392175	-1.71045	0.0871822	0.243292	0.485014	-0.646086
WBGene00003130	map-2	Y116A8A.9	63.4018	6.28677	0.138587	45.3634	0	0	63.4018	-0.0274138	0.195301	-0.140367	0.88837	0.995157	63.4018	0.164129	0.233382	0.703263	0.481892	0.526199	63.4018	-0.557643	0.209355	-2.66362	0.0077305	0.0180427	63.4018	-0.0347363	0.318718	-0.108987	0.913213	0.958448	0.136715	0.129393
WBGene00003132	mat-1	Y110A7A.17	88.4793	6.3182	0.150804	41.8967	0	0	88.4793	0.193796	0.211885	0.914628	0.360387	0.99478	88.4793	-1.27678	0.231392	-5.51783	3.43216e-08	1.19366e-07	88.4793	0.777058	0.206867	3.75631	0.000172435	0.000637207	88.4793	0.200595	0.331484	0.605144	0.545083	0.73264	-1.08298	-1.07619
WBGene00003133	mat-2	W10C6.1	80.0203	7.16682	0.123672	57.9503	0	0	80.0203	-0.0430838	0.174519	-0.246871	0.805008	0.99478	80.0203	-0.623085	0.241914	-2.57564	0.0100054	0.0149403	80.0203	-1.28271	0.191326	-6.70431	2.02356e-11	2.59515e-10	80.0203	0.391687	0.320327	1.22277	0.221415	0.441485	-0.666169	-0.231398
WBGene00003134	mat-3	F10C5.1	38.9925	5.69964	0.152965	37.2612	6.98826e-304	1.87241e-303	38.9925	0.232181	0.214038	1.08477	0.278025	0.993575	38.9925	-0.992485	0.319464	-3.10672	0.00189176	0.00317795	38.9925	-0.498615	0.235414	-2.11804	0.0341719	0.0654977	38.9925	0.739607	0.404368	1.82904	0.0673931	0.205818	-0.760303	-0.252878
WBGene00003136	mau-2	C09H6.3	30.0109	5.2978	0.165627	31.9864	1.68706e-224	3.49281e-224	30.0109	-0.142143	0.233896	-0.60772	0.543373	0.99478	30.0109	-1.4226	0.354742	-4.01024	6.06575e-05	0.000130104	30.0109	-0.102407	0.248388	-0.412288	0.680129	0.755846	30.0109	1.23041	0.451852	2.72304	0.00646839	0.0400549	-1.56474	-0.192191
WBGene00003142	mau-8	Y62E10A.8	19.988	4.90762	0.189803	25.8564	2.0618e-147	3.31676e-147	19.988	-0.0336669	0.267151	-0.126022	0.899714	1	19.988	-1.48355	0.418757	-3.54274	0.000395991	0.00074508	19.988	-0.171932	0.286492	-0.600129	0.54842	0.639467	19.988	0.372515	0.566771	0.657258	0.511015	0.708758	-1.51721	-1.11103
WBGene00003143	max-1	C34B4.1	23.3556	4.21758	0.353336	11.9365	7.63863e-33	8.27126e-33	23.3556	-0.10708	0.499119	-0.214538	0.830128	0.99478	23.3556	-0.00433672	0.492924	-0.00879795	0.99298	0.993595	23.3556	0.35719	0.488292	0.73151	0.464468	0.561154	23.3556	0.436261	0.710721	0.613829	0.539328	0.728526	-0.111416	0.431924
WBGene00003144	max-2	Y38F1A.10	127.473	6.76453	0.134207	50.4038	0	0	127.473	-0.161197	0.189716	-0.849675	0.395506	0.99478	127.473	-1.25519	0.201059	-6.2429	4.29539e-10	1.88085e-09	127.473	0.83657	0.183259	4.56496	4.99585e-06	2.65499e-05	127.473	0.968424	0.285539	3.39156	0.000694955	0.00779807	-1.41639	-0.286766
WBGene00003148	mbf-1	H21P03.1	119.029	5.67775	0.130237	43.5954	0	0	119.029	0.258826	0.181298	1.42763	0.153398	0.973531	119.029	0.918555	0.175654	5.22933	1.70124e-07	5.33632e-07	119.029	1.05478	0.18133	5.81694	5.99342e-09	5.57599e-08	119.029	-0.758401	0.257114	-2.94967	0.00318114	0.0241607	1.17738	0.160154
WBGene00003149	mbk-1	T04C10.1	30.024	5.26983	0.281882	18.6951	5.42544e-78	6.84738e-78	30.024	-0.177002	0.398609	-0.44405	0.657007	0.99478	30.024	1.51585	0.436947	3.4692	0.000522018	0.000961633	30.024	-1.60129	0.431299	-3.71273	0.000205038	0.000744648	30.024	-0.000425298	0.580437	-0.000732719	0.999415	0.999415	1.33885	1.51543
WBGene00003150	mbk-2	F49E11.1	215.49	7.84675	0.0830512	94.4809	0	0	215.49	0.192335	0.116583	1.64977	0.0989891	0.954102	215.49	-1.2773	0.137755	-9.27225	1.82267e-20	2.1577e-19	215.49	0.465321	0.116178	4.00525	6.19518e-05	0.000254243	215.49	-0.0199858	0.196513	-0.101702	0.918993	0.961997	-1.08497	-1.29729
WBGene00003151	mca-1	W09C2.3	91.3822	6.44139	0.115669	55.6884	0	0	91.3822	0.00366898	0.162696	0.0225512	0.982008	0.998148	91.3822	0.877639	0.190241	4.61331	3.96311e-06	1.01828e-05	91.3822	-0.504444	0.179126	-2.81615	0.00486035	0.0120765	91.3822	-0.0400036	0.251485	-0.15907	0.873614	0.938067	0.881308	0.837636
WBGene00003153	mca-3	Y67D8C.10	149.488	6.89242	0.172163	40.0343	0	0	149.488	0.102987	0.242839	0.424096	0.671496	0.99478	149.488	0.518259	0.228959	2.26355	0.023602	0.0330204	149.488	0.171775	0.235875	0.728244	0.466464	0.562483	149.488	-0.316982	0.337361	-0.939591	0.347427	0.572083	0.621246	0.201277
WBGene00003154	mcm-2	Y17G7B.5	139.416	7.25104	0.095204	76.1632	0	0	139.416	0.211976	0.133439	1.58856	0.112161	0.955072	139.416	-2.91837	0.210688	-13.8517	1.24317e-43	5.63394e-42	139.416	0.748902	0.132125	5.66815	1.44345e-08	1.2515e-07	139.416	1.24636	0.269225	4.62942	3.66693e-06	0.000144129	-2.7064	-1.67202
WBGene00003155	mcm-3	C25D7.6	149.878	7.30854	0.173221	42.192	0	0	149.878	0.281947	0.244246	1.15436	0.248354	0.993234	149.878	-2.57829	0.263618	-9.78039	1.36684e-22	1.86288e-21	149.878	0.715226	0.232755	3.07288	0.00212006	0.00582407	149.878	0.976313	0.37188	2.62535	0.00865605	0.0493204	-2.29634	-1.60198
WBGene00003156	mcm-4	Y39G10AR.14	147.495	7.36908	0.172002	42.843	0	0	147.495	0.213169	0.242638	0.878546	0.379647	0.99478	147.495	-2.14853	0.252916	-8.49506	1.97829e-17	1.82671e-16	147.495	0.577996	0.231558	2.49612	0.0125562	0.0275067	147.495	0.548339	0.364762	1.50328	0.132767	0.320429	-1.93537	-1.6002
WBGene00003157	mcm-5	R10E4.4	140.484	7.41906	0.129905	57.1113	0	0	140.484	0.302846	0.182784	1.65685	0.097549	0.954102	140.484	-2.25303	0.226098	-9.9648	2.17316e-23	3.15385e-22	140.484	0.241539	0.178798	1.3509	0.176727	0.259076	140.484	0.905742	0.305896	2.96095	0.00306689	0.0235241	-1.95018	-1.34728
WBGene00003158	mcm-6	ZK632.1	176.275	7.76855	0.157869	49.2089	0	0	176.275	0.157926	0.222819	0.708764	0.478471	0.99478	176.275	-2.37721	0.241565	-9.84091	7.50312e-23	1.04973e-21	176.275	0.314854	0.213147	1.47717	0.13963	0.212714	176.275	1.0763	0.339812	3.16734	0.00153843	0.0141198	-2.21929	-1.30092
WBGene00003159	mcm-7	F32D1.10	210.37	7.9848	0.120713	66.1468	0	0	210.37	0.316229	0.170023	1.85992	0.0628965	0.900769	210.37	-2.20145	0.19274	-11.4219	3.25213e-30	7.92854e-29	210.37	0.378867	0.16419	2.3075	0.0210272	0.0431705	210.37	0.43698	0.272144	1.60569	0.108342	0.278954	-1.88522	-1.76447
WBGene00003160	mdf-1	C50F4.11	58.3847	6.10867	0.146011	41.8371	0	0	58.3847	0.159043	0.204969	0.775935	0.437788	0.99478	58.3847	-0.238592	0.248327	-0.960798	0.336654	0.38008	58.3847	-0.334276	0.216694	-1.54262	0.122924	0.191771	58.3847	0.0545234	0.337954	0.161334	0.871831	0.937368	-0.0795493	-0.184069
WBGene00003161	mdf-2	Y69A2AR.30	43.6707	6.00658	0.144976	41.4315	0	0	43.6707	0.289723	0.202851	1.42825	0.153219	0.973531	43.6707	-1.88089	0.339823	-5.53491	3.11381e-08	1.08601e-07	43.6707	-0.370697	0.217712	-1.7027	0.0886251	0.146492	43.6707	0.75536	0.431808	1.7493	0.08024	0.229723	-1.59117	-1.12553
WBGene00003162	mdh-2	F20H11.3	216.617	7.76967	0.0961926	80.772	0	0	216.617	0.0767402	0.135467	0.566485	0.571064	0.99478	216.617	0.800829	0.142541	5.61822	1.92934e-08	6.91175e-08	216.617	-0.44686	0.139969	-3.19257	0.00141012	0.00408012	216.617	-0.579544	0.20185	-2.87116	0.00408962	0.028973	0.877569	0.221285
WBGene00003163	mdl-1	R03E9.1	189.829	5.33166	0.160819	33.1531	5.11023e-241	1.11684e-240	189.829	-0.35551	0.2288	-1.5538	0.120232	0.965307	189.829	1.98054	0.200105	9.89748	4.26905e-23	6.02973e-22	189.829	1.39352	0.218576	6.37545	1.82428e-10	2.07323e-09	189.829	-0.241726	0.300952	-0.803203	0.421857	0.637875	1.62503	1.73881
WBGene00003164	mdt-6	Y57E12AL.5	48.6256	5.97082	0.170087	35.1045	5.74966e-270	1.39118e-269	48.6256	0.0913264	0.239361	0.381543	0.702801	0.99478	48.6256	-2.22314	0.341464	-6.51061	7.48471e-11	3.61843e-10	48.6256	0.154328	0.240185	0.642537	0.520524	0.613306	48.6256	1.24858	0.442969	2.81867	0.00482237	0.0325089	-2.13181	-0.974559
WBGene00003169	mec-5	E03G2.3	13.2301	3.59053	0.253036	14.1898	1.05997e-45	1.19323e-45	13.2301	0.100406	0.353559	0.283986	0.776421	1	13.2301	1.87096	0.485978	3.84989	0.000118169	0.000240871	13.2301	-1.15028	0.461296	-2.49359	0.0126458	0.0276671	13.2301	-0.431377	0.569008	-0.75812	0.448379	1	1.97137	1.43959
WBGene00003172	mec-8	F46A9.6	27.6724	5.85452	0.229484	25.5117	1.4624e-143	2.32318e-143	27.6724	-0.383605	0.325341	-1.17908	0.238364	0.993234	27.6724	0.226682	0.437233	0.518447	0.604147	0.640175	27.6724	-2.16224	0.372586	-5.80334	6.50065e-09	6.01758e-08	27.6724	0.835135	0.553161	1.50975	0.131107	0.317147	-0.156923	1.06182
WBGene00003175	mec-12	C44B11.3	14.5978	3.61399	0.235337	15.3567	3.19477e-53	3.69266e-53	14.5978	-0.30819	0.334945	-0.920119	0.357511	1	14.5978	0.833309	0.387864	2.14846	0.0316774	0.0433094	14.5978	0.100539	0.36411	0.276121	0.782455	0.839993	14.5978	-0.684222	0.562033	-1.2174	0.223451	1	0.52512	0.149087
WBGene00003177	mec-15	T01E8.4	55.7584	6.17478	0.163659	37.7297	0	0	55.7584	0.0632688	0.230485	0.274503	0.783698	0.99478	55.7584	-1.4187	0.288509	-4.91734	8.77271e-07	2.48959e-06	55.7584	-0.000678138	0.232223	-0.0029202	0.99767	0.999014	55.7584	0.56512	0.395032	1.43057	0.152554	0.350965	-1.35543	-0.853577
WBGene00003178	mec-17	F57H12.7	14.9843	3.77057	0.220553	17.096	1.59017e-65	1.91718e-65	14.9843	-0.48045	0.317176	-1.51478	0.129829	1	14.9843	1.4138	0.41868	3.3768	0.000733351	0.00131775	14.9843	-0.761615	0.388035	-1.96275	0.0496756	0.0904272	14.9843	0.418223	0.507549	0.824005	0.409937	0.627401	0.933347	1.83202
WBGene00003183	mei-1	T01G9.5	91.9418	6.7789	0.153577	44.1402	0	0	91.9418	0.0153937	0.216637	0.0710573	0.943352	0.996018	91.9418	-2.26776	0.265547	-8.53994	1.34287e-17	1.26528e-16	91.9418	0.436185	0.210761	2.06957	0.0384923	0.0726475	91.9418	1.136	0.3614	3.14334	0.0016703	0.0149361	-2.25237	-1.13176
WBGene00003184	mei-2	F57B10.12	99.8531	6.86457	0.113526	60.4672	0	0	99.8531	0.0352095	0.159777	0.220367	0.825585	0.99478	99.8531	-2.07612	0.217823	-9.5312	1.55478e-21	1.98705e-20	99.8531	0.478272	0.159149	3.00519	0.00265417	0.00709092	99.8531	0.848502	0.292903	2.89687	0.00376911	0.0274573	-2.04091	-1.22761
WBGene00003185	mek-1	K08A8.1	49.9076	6.06326	0.194314	31.2034	9.5778e-214	1.91116e-213	49.9076	0.291181	0.273242	1.06565	0.28658	0.99478	49.9076	-0.240284	0.30862	-0.778576	0.436229	0.481246	49.9076	-0.616101	0.280893	-2.19337	0.0282808	0.0558285	49.9076	-0.444073	0.437212	-1.01569	0.309777	0.535642	0.0508969	-0.684357
WBGene00003196	mel-11	C06C3.1	83.7825	6.57277	0.151882	43.2756	0	0	83.7825	-0.0875202	0.214468	-0.40808	0.683215	0.99478	83.7825	-0.821028	0.236207	-3.47588	0.000509181	0.00094033	83.7825	0.104363	0.212787	0.490458	0.62381	0.706761	83.7825	0.557971	0.332296	1.67914	0.0931254	0.253438	-0.908548	-0.263057
WBGene00003209	mel-26	ZK858.4	104.915	6.71479	0.163691	41.0211	0	0	104.915	0.0632134	0.230833	0.273849	0.784201	0.99478	104.915	-1.49458	0.242841	-6.15458	7.52775e-10	3.20689e-09	104.915	0.661376	0.22252	2.9722	0.00295669	0.00781155	104.915	0.478188	0.349856	1.36681	0.171684	0.37714	-1.43137	-1.01639
WBGene00003210	mel-28	C38D4.3	122.485	7.5194	0.0924261	81.3557	0	0	122.485	0.0690243	0.130023	0.530862	0.595514	0.99478	122.485	-1.42673	0.186478	-7.65095	1.99493e-14	1.42657e-13	122.485	-0.347074	0.136489	-2.54288	0.0109944	0.024544	122.485	0.420635	0.251052	1.67549	0.0938385	0.254516	-1.35771	-1.0061
WBGene00003214	mel-32	C05D11.11	336.725	8.38701	0.0745404	112.516	0	0	336.725	0.0243357	0.105026	0.231711	0.816762	0.99478	336.725	0.332351	0.109962	3.02241	0.0025077	0.00412845	336.725	-0.0719599	0.106488	-0.675754	0.499197	0.593334	336.725	-0.46301	0.158582	-2.91968	0.00350387	0.0258773	0.356687	-0.130658
WBGene00003216	memi-1	Y17G9B.9	46.7865	5.94348	0.17377	34.2031	2.17116e-256	5.00886e-256	46.7865	-0.194841	0.245793	-0.792703	0.427951	0.99478	46.7865	-2.83476	0.37086	-7.64376	2.10974e-14	1.50431e-13	46.7865	0.413946	0.241864	1.71149	0.0869916	0.144212	46.7865	1.69495	0.476236	3.55906	0.000372181	0.00482172	-3.0296	-1.13981
WBGene00003218	mep-1	M04B2.1	91.5636	6.90271	0.14065	49.0773	0	0	91.5636	-0.0779335	0.198604	-0.392407	0.694758	0.99478	91.5636	-1.4284	0.239623	-5.96101	2.50683e-09	1.0056e-08	91.5636	-0.0751968	0.198001	-0.379781	0.704108	0.777118	91.5636	1.04783	0.32508	3.22328	0.0012673	0.0122809	-1.50633	-0.380572
WBGene00003220	mes-2	R06A4.7	39.9899	5.74838	0.15708	36.5953	3.40354e-293	8.85279e-293	39.9899	0.0157981	0.221032	0.0714745	0.94302	0.995995	39.9899	-2.16016	0.362664	-5.95636	2.57914e-09	1.03207e-08	39.9899	-0.0451622	0.229865	-0.196472	0.84424	0.887837	39.9899	1.66046	0.447325	3.71199	0.00020564	0.00308993	-2.14436	-0.499692
WBGene00003221	mes-3	F54C1.3	33.3215	5.78956	0.134143	43.1596	0	0	33.3215	-0.420483	0.191395	-2.19694	0.0280247	0.792078	33.3215	-0.258667	0.295069	-0.87663	0.380687	0.424666	33.3215	-0.970777	0.225622	-4.30268	1.68747e-05	7.87946e-05	33.3215	0.523985	0.385262	1.36007	0.173806	0.380064	-0.679149	0.265318
WBGene00003222	mes-4	Y2H9A.1	66.845	6.57795	0.144753	45.4425	0	0	66.845	0.113313	0.203739	0.556166	0.578097	0.99478	66.845	-2.11681	0.308032	-6.87206	6.32825e-12	3.49639e-11	66.845	-0.320209	0.208971	-1.53231	0.125446	0.194882	66.845	1.48477	0.387758	3.82912	0.000128602	0.00225253	-2.0035	-0.632038
WBGene00003224	mes-6	C09G4.5	19.6966	4.48286	0.229956	19.4944	1.2239e-84	1.57646e-84	19.6966	0.444902	0.320218	1.38937	0.164719	1	19.6966	-1.26269	0.4242	-2.97664	0.00291429	0.00474705	19.6966	0.287237	0.331152	0.867388	0.38573	0.485249	19.6966	-0.494261	0.605845	-0.815822	0.414602	0.629916	-0.817787	-1.75695
WBGene00003225	mev-1	T07C4.7	78.5556	5.61609	0.107638	52.1757	0	0	78.5556	0.427695	0.147425	2.90111	0.00371838	0.66304	78.5556	0.601397	0.171509	3.5065	0.00045404	0.000846754	78.5556	0.552577	0.161137	3.42923	0.000605296	0.00195169	78.5556	-0.810143	0.237996	-3.40402	0.00066402	0.00752376	1.02909	-0.208747
WBGene00003228	mex-1	W03C9.7	141.408	7.35823	0.158713	46.3618	0	0	141.408	0.215051	0.223785	0.96097	0.336567	0.99478	141.408	-2.90877	0.267722	-10.8649	1.69397e-27	3.37288e-26	141.408	0.522188	0.214576	2.43358	0.0149504	0.0320389	141.408	1.55391	0.360984	4.30466	1.6724e-05	0.000454813	-2.69372	-1.35486
WBGene00003229	mex-3	F53G12.5	190.763	7.61699	0.193998	39.2633	0	0	190.763	0.275321	0.273838	1.00541	0.314698	0.99478	190.763	-2.88423	0.280813	-10.271	9.52194e-25	1.5459e-23	190.763	0.830895	0.258947	3.20875	0.00133314	0.00388323	190.763	1.28881	0.400893	3.21484	0.00130517	0.0124384	-2.60891	-1.59543
WBGene00003230	mex-5	W02A2.7	301.847	8.04333	0.10673	75.3614	0	0	301.847	0.341051	0.150157	2.2713	0.023129	0.769638	301.847	-2.80743	0.172198	-16.3035	9.32609e-60	8.40144e-58	301.847	1.12772	0.143315	7.86882	3.57996e-15	6.74622e-14	301.847	1.28404	0.236303	5.43387	5.51452e-08	5.11527e-06	-2.46638	-1.52339
WBGene00003231	mex-6	AH6.5	204.227	7.74296	0.172702	44.8342	0	0	204.227	0.0984507	0.243892	0.403666	0.686458	0.99478	204.227	-3.09834	0.26232	-11.8113	3.41121e-32	9.5089e-31	204.227	0.808177	0.230898	3.50015	0.000464991	0.00154586	204.227	1.85759	0.365699	5.07957	3.78298e-07	2.46818e-05	-2.99989	-1.24075
WBGene00003234	mif-1	Y56A3A.3	17.7068	3.9617	0.2415	16.4046	1.77341e-60	2.10276e-60	17.7068	-0.148094	0.341018	-0.43427	0.664092	1	17.7068	0.796871	0.370659	2.14988	0.0315647	0.0431634	17.7068	0.196637	0.358206	0.548948	0.583041	0.670088	17.7068	-1.4255	0.57622	-2.47389	0.0133653	0.0672322	0.648777	-0.62863
WBGene00003235	mif-2	C52E4.2	32.8847	4.57227	0.198547	23.0287	2.40487e-117	3.47715e-117	32.8847	-0.412457	0.283336	-1.45572	0.145471	0.969	32.8847	0.739694	0.300546	2.46117	0.0138485	0.0201257	32.8847	0.27559	0.291557	0.945236	0.344538	0.444094	32.8847	0.0888427	0.423816	0.209626	0.83396	0.913784	0.327237	0.828537
WBGene00003236	mif-3	F13G3.9	15.7442	4.24999	0.222902	19.0667	4.77905e-81	6.0846e-81	15.7442	-0.226218	0.315692	-0.716579	0.473634	1	15.7442	-0.247449	0.422652	-0.585468	0.558233	0.597027	15.7442	-0.301047	0.346559	-0.868674	0.385026	0.484611	15.7442	0.31044	0.568951	0.545636	0.585316	0.760846	-0.473668	0.0629908
WBGene00003239	mig-2	C35C5.4	20.564	4.90329	0.19088	25.6878	1.59835e-145	2.55619e-145	20.564	-0.254492	0.270548	-0.940654	0.346882	0.99478	20.564	0.911571	0.42111	2.16468	0.0304119	0.0416795	20.564	-1.77521	0.359294	-4.94081	7.77991e-07	4.84572e-06	20.564	0.852244	0.477792	1.78371	0.0744704	0.218973	0.657079	1.76382
WBGene00003241	mig-5	T05C12.6	78.8456	6.49248	0.134962	48.1059	0	0	78.8456	0.21573	0.189424	1.13887	0.254757	0.993234	78.8456	-2.42865	0.270508	-8.97809	2.75518e-19	2.98863e-18	78.8456	0.47981	0.188355	2.54737	0.0108539	0.0242815	78.8456	1.14219	0.351994	3.24491	0.00117488	0.01166	-2.21292	-1.28646
WBGene00003242	mig-6	C37C3.6	297.042	7.30876	0.113636	64.3171	0	0	297.042	-0.280516	0.160979	-1.74256	0.0814101	0.949683	297.042	1.48881	0.15001	9.92475	3.2491e-23	4.64867e-22	297.042	0.379513	0.157726	2.40616	0.0161212	0.0341812	297.042	-0.515583	0.221065	-2.33227	0.0196865	0.0876669	1.20829	0.973226
WBGene00003243	mig-10	F10E9.6	28.5071	4.34395	0.180511	24.0647	5.86044e-128	8.81871e-128	28.5071	-0.219078	0.255689	-0.856817	0.391546	0.99478	28.5071	1.10976	0.307404	3.61009	0.000306093	0.000586997	28.5071	-0.15654	0.289631	-0.54048	0.588866	0.675249	28.5071	0.28341	0.393415	0.720384	0.471288	0.676151	0.890678	1.39317
WBGene00003245	mig-13	F43C9.4	22.6396	5.24942	0.241942	21.6971	2.18695e-104	3.02132e-104	22.6396	-0.653379	0.34514	-1.89308	0.0583467	0.894412	22.6396	1.49485	0.422088	3.54156	0.00039777	0.000747667	22.6396	-1.9016	0.400763	-4.74496	2.08552e-06	1.18688e-05	22.6396	0.0102605	0.548314	0.0187129	0.98507	0.992411	0.841471	1.50511
WBGene00003246	mig-14	R06B9.6	40.4528	5.53388	0.14202	38.9655	0	0	40.4528	0.0318365	0.199304	0.159738	0.873088	0.99478	40.4528	-2.22749	0.332802	-6.69314	2.18431e-11	1.12678e-10	40.4528	0.429023	0.205918	2.08347	0.0372086	0.0705131	40.4528	1.41608	0.415898	3.40488	0.000661928	0.00751229	-2.19565	-0.811406
WBGene00003247	mig-15	ZC504.4	25.172	5.27403	0.260035	20.282	1.85431e-91	2.45173e-91	25.172	-0.232505	0.367987	-0.631831	0.527497	0.99478	25.172	1.16408	0.418469	2.78177	0.00540636	0.00838831	25.172	-1.50874	0.40225	-3.75074	0.000176311	0.000650011	25.172	-0.831137	0.587911	-1.41371	0.157447	0.357842	0.931578	0.332947
WBGene00003248	mig-17	F57B7.4	19.5286	3.95594	0.263641	15.0051	6.80383e-51	7.80312e-51	19.5286	-0.318732	0.374518	-0.851047	0.394743	1	19.5286	1.26771	0.402266	3.15143	0.00162473	0.00276287	19.5286	-0.156757	0.397461	-0.394396	0.693289	0.76724	19.5286	-0.504893	0.565329	-0.893095	0.371806	0.595181	0.948982	0.762821
WBGene00003249	mig-18	F11F1.6	27.2035	2.42925	0.338991	7.16612	7.71533e-13	7.88941e-13	27.2035	0.254626	0.4689	0.543028	0.58711	0.99478	27.2035	2.50489	0.439817	5.69531	1.2315e-08	4.51469e-08	27.2035	0.986444	0.482854	2.04294	0.041058	0.0766866	27.2035	-0.705187	0.617004	-1.14292	0.253071	0.47582	2.75952	1.79971
WBGene00003253	mig-22	PAR2.4	80.6474	6.47978	0.122567	52.8671	0	0	80.6474	0.198762	0.171793	1.15699	0.247278	0.993234	80.6474	-1.23048	0.2174	-5.65998	1.51391e-08	5.49544e-08	80.6474	0.289695	0.174936	1.656	0.0977209	0.158165	80.6474	0.225098	0.300003	0.750321	0.453061	0.660786	-1.03172	-1.00538
WBGene00003254	mig-23	R07E4.4	15.0476	4.05599	0.187923	21.5832	2.58154e-103	3.5525e-103	15.0476	0.218202	0.260061	0.839042	0.401446	1	15.0476	1.74095	0.429309	4.05523	5.00846e-05	0.000108848	15.0476	-1.44854	0.389737	-3.71671	0.000201831	0.000734809	15.0476	-0.594471	0.47794	-1.24382	0.213566	0.433374	1.95915	1.14648
WBGene00003258	cogc-1	Y54E10A.2	40.5699	5.48216	0.290264	18.8868	1.46351e-79	1.855e-79	40.5699	-0.0516281	0.410008	-0.12592	0.899795	0.995157	40.5699	-1.45578	0.430262	-3.38348	0.00071574	0.00128798	40.5699	0.267211	0.395766	0.675175	0.499564	0.593484	40.5699	1.25168	0.606577	2.0635	0.0390647	0.142714	-1.50741	-0.204106
WBGene00003367	mix-1	M106.1	106.696	7.64094	0.183582	41.6215	0	0	106.696	0.0382427	0.259343	0.14746	0.882769	0.995157	106.696	-0.638599	0.282546	-2.26016	0.0238114	0.0332693	106.696	-1.42741	0.259286	-5.50518	3.68796e-08	2.97738e-07	106.696	0.104351	0.401477	0.259917	0.794928	0.891065	-0.600357	-0.534249
WBGene00003369	mlc-1	C36E6.3	249.161	7.00351	0.109796	63.7867	0	0	249.161	-0.244098	0.155485	-1.56991	0.116436	0.956153	249.161	1.34037	0.145488	9.21289	3.17467e-20	3.71065e-19	249.161	0.624142	0.152556	4.09122	4.29104e-05	0.000183969	249.161	-0.795829	0.216797	-3.67085	0.000241741	0.0035184	1.09627	0.544539
WBGene00003370	mlc-2	C36E6.5	261.284	6.96019	0.136104	51.1388	0	0	261.284	0.111338	0.191691	0.580818	0.561363	0.99478	261.284	1.57307	0.176015	8.93717	3.99279e-19	4.28081e-18	261.284	0.546625	0.186794	2.92636	0.00342957	0.00891423	261.284	-1.18531	0.262346	-4.51813	6.23872e-06	0.000211721	1.68441	0.387759
WBGene00003371	mlc-3	F09F7.2	915.888	7.99411	0.118847	67.2641	0	0	915.888	-0.0125791	0.167808	-0.0749611	0.940246	0.995931	915.888	1.58445	0.146727	10.7987	3.49206e-27	6.7813e-26	915.888	1.40222	0.158544	8.84439	9.20284e-19	2.20719e-17	915.888	-0.934133	0.223296	-4.18338	2.87212e-05	0.000689012	1.57188	0.650322
WBGene00003372	mlc-4	C56G7.1	104.971	6.19761	0.117555	52.721	0	0	104.971	0.104263	0.16472	0.632971	0.526753	0.99478	104.971	-0.165272	0.173317	-0.953577	0.340298	0.383725	104.971	0.881959	0.16424	5.36994	7.87626e-08	6.03547e-07	104.971	-0.317397	0.252799	-1.25553	0.209286	0.427607	-0.0610085	-0.482669
WBGene00003373	mlh-1	T28A8.7	48.8641	5.52801	0.166082	33.2849	6.3936e-243	1.4036e-242	48.8641	0.0970227	0.233199	0.416051	0.677373	0.99478	48.8641	-1.91855	0.302528	-6.34174	2.27182e-10	1.0321e-09	48.8641	0.795612	0.230754	3.44788	0.000565001	0.00183619	48.8641	1.08437	0.40341	2.688	0.00718815	0.0430892	-1.82153	-0.834186
WBGene00003374	mlk-1	K11D12.10	29.2674	4.59764	0.20377	22.5629	1.00363e-112	1.42821e-112	29.2674	-0.269468	0.289027	-0.932328	0.351167	0.99478	29.2674	1.00517	0.313776	3.20346	0.00135785	0.00233537	29.2674	-0.0252579	0.305585	-0.082654	0.934127	0.953054	29.2674	-0.508845	0.445186	-1.14299	0.253041	0.47582	0.735702	0.496325
WBGene00003375	mlp-1	T04C9.4	21.2322	4.12673	0.269826	15.2941	8.37559e-53	9.66877e-53	21.2322	-0.298396	0.38282	-0.779467	0.435705	0.99478	21.2322	1.17901	0.401694	2.93508	0.00333459	0.00536775	21.2322	-0.133527	0.399231	-0.334462	0.738031	0.805341	21.2322	-0.533502	0.571741	-0.933119	0.350759	0.575661	0.88061	0.645503
WBGene00003378	mml-1	T20B12.6	23.5005	5.04096	0.198902	25.3439	1.04798e-141	1.65557e-141	23.5005	-0.206417	0.281445	-0.733417	0.463304	0.99478	23.5005	1.24519	0.365811	3.40391	0.000664284	0.00120124	23.5005	-1.37478	0.337615	-4.07202	4.66067e-05	0.000197864	23.5005	-0.691765	0.48744	-1.41918	0.155846	0.35525	1.03877	0.553422
WBGene00003384	moc-1	T06H11.4	13.8257	4.41238	0.274333	16.084	3.30112e-58	3.8855e-58	13.8257	-0.0660324	0.386987	-0.170632	0.864513	1	13.8257	0.391475	0.512425	0.763964	0.444889	0.489484	13.8257	-1.29816	0.444744	-2.9189	0.0035127	0.00909509	13.8257	0.154822	0.662167	0.233811	0.815131	1	0.325442	0.546297
WBGene00003385	moc-2	W01A11.6	12.3157	2.76003	0.341414	8.08412	6.26125e-16	6.45885e-16	12.3157	0.166797	0.476026	0.350394	0.726043	1	12.3157	1.25757	0.492611	2.55287	0.0106839	0.0158605	12.3157	0.49807	0.498797	0.998542	0.318016	0.417188	12.3157	-1.16912	0.712344	-1.64123	0.10075	1	1.42437	0.0884505
WBGene00003389	mog-1	K03H1.2	92.6321	7.16566	0.170771	41.9606	0	0	92.6321	0.052851	0.241062	0.219243	0.826461	0.99478	92.6321	-0.458833	0.264441	-1.73511	0.0827221	0.105121	92.6321	-0.957737	0.242852	-3.94371	8.02297e-05	0.000319491	92.6321	0.235912	0.37089	0.63607	0.524731	0.719036	-0.405982	-0.222922
WBGene00003391	mog-3	F52C9.7	70.4635	6.87213	0.122592	56.0568	0	0	70.4635	-0.0163729	0.172818	-0.0947406	0.924521	0.995931	70.4635	-0.376905	0.228589	-1.64883	0.0991818	0.124158	70.4635	-0.934787	0.18842	-4.96118	7.00652e-07	4.42747e-06	70.4635	-0.403236	0.324658	-1.24203	0.214224	0.433874	-0.393278	-0.780141
WBGene00003392	mog-4	C04H5.6	58.942	6.54165	0.146141	44.7627	0	0	58.942	0.0278459	0.205949	0.135208	0.892447	0.995157	58.942	-0.411662	0.270755	-1.52042	0.128405	0.157372	58.942	-1.04242	0.223617	-4.66165	3.13677e-06	1.71894e-05	58.942	0.310537	0.359719	0.863277	0.387985	0.609441	-0.383816	-0.101125
WBGene00003393	mog-5	EEED8.5	79.2877	6.93425	0.14833	46.7489	0	0	79.2877	-0.168275	0.209726	-0.802359	0.422345	0.99478	79.2877	-0.478893	0.241518	-1.98285	0.0473841	0.0630225	79.2877	-0.695059	0.214439	-3.24129	0.00118988	0.00351306	79.2877	0.0704838	0.342617	0.205722	0.837008	0.915308	-0.647168	-0.408409
WBGene00003395	mom-2	F38E1.7	140.973	7.35724	0.0893013	82.3867	0	0	140.973	0.311804	0.124851	2.49741	0.0125105	0.747418	140.973	-2.23238	0.186275	-11.9843	4.29491e-33	1.264e-31	140.973	0.439599	0.126442	3.4767	0.000507631	0.00167405	140.973	0.568304	0.247081	2.30007	0.0214442	0.0933262	-1.92057	-1.66407
WBGene00003396	mom-4	F52F12.3	37.9928	5.28391	0.165111	32.0022	1.01633e-224	2.10651e-224	37.9928	0.144956	0.231199	0.626974	0.530676	0.99478	37.9928	-1.26719	0.292855	-4.32702	1.51143e-05	3.55344e-05	37.9928	0.608125	0.234161	2.59703	0.00940325	0.0214058	37.9928	-0.00550902	0.414942	-0.0132766	0.989407	0.993692	-1.12223	-1.2727
WBGene00003397	mom-5	T23D8.1	55.312	6.37663	0.129948	49.0708	0	0	55.312	-0.134107	0.183539	-0.730674	0.464978	0.99478	55.312	-0.234502	0.244591	-0.958752	0.337684	0.381068	55.312	-0.777533	0.202269	-3.84405	0.000121022	0.000461535	55.312	0.0758289	0.332436	0.228101	0.819568	0.905134	-0.368609	-0.158673
WBGene00003401	mpk-1	F43C1.2	45.7538	5.71705	0.179539	31.8429	1.64901e-222	3.38744e-222	45.7538	0.133595	0.252393	0.529313	0.596588	0.99478	45.7538	-1.13052	0.323395	-3.49579	0.000472665	0.000877281	45.7538	-0.165855	0.259806	-0.638382	0.523225	0.615599	45.7538	1.16061	0.421173	2.75566	0.0058573	0.0371122	-0.996924	0.0300939
WBGene00003402	mpk-2	C04G6.1	20.3235	3.71613	0.2196	16.9223	3.08151e-64	3.69711e-64	20.3235	-0.693575	0.320742	-2.16241	0.0305867	0.792081	20.3235	2.75225	0.399406	6.89086	5.54574e-12	3.08018e-11	20.3235	-0.918932	0.401254	-2.29015	0.0220125	0.0449189	20.3235	-0.342724	0.476151	-0.719779	0.471661	0.676427	2.05868	2.40953
WBGene00003404	mpz-1	C52A11.4	30.852	5.91875	0.245367	24.122	1.46862e-128	2.21538e-128	30.852	-0.564499	0.348461	-1.61998	0.105237	0.954102	30.852	1.24634	0.405708	3.07201	0.00212622	0.00354385	30.852	-2.15045	0.387277	-5.55275	2.81211e-08	2.30812e-07	30.852	-0.431381	0.559566	-0.77092	0.440755	0.651912	0.68184	0.814958
WBGene00003405	mre-11	ZC302.1	60.939	5.93366	0.140329	42.284	0	0	60.939	0.25374	0.196241	1.293	0.196012	0.981054	60.939	-1.85026	0.266333	-6.94716	3.72712e-12	2.11299e-11	60.939	0.620291	0.19744	3.14167	0.00167987	0.00475996	60.939	0.854734	0.351912	2.42883	0.0151476	0.0733348	-1.59652	-0.995527
WBGene00003406	mrg-1	Y37D8A.9	98.5385	6.66448	0.108698	61.3117	0	0	98.5385	0.127832	0.152443	0.838556	0.401718	0.99478	98.5385	-2.14402	0.21603	-9.92462	3.2535e-23	4.64867e-22	98.5385	0.678858	0.15244	4.45329	8.45652e-06	4.25534e-05	98.5385	1.13176	0.281971	4.01375	5.97618e-05	0.00123007	-2.01619	-1.01226
WBGene00003407	mrp-1	F57C12.5	72.102	6.08717	0.168636	36.0965	2.57113e-285	6.52454e-285	72.102	-0.521404	0.240126	-2.17137	0.0299031	0.792078	72.102	1.37649	0.249103	5.52577	3.28047e-08	1.14306e-07	72.102	-0.62292	0.249576	-2.49591	0.0125635	0.0275146	72.102	-0.0820275	0.347983	-0.235723	0.813648	0.900931	0.855083	1.29446
WBGene00003408	mrp-2	F57C12.4	37.2832	5.75807	0.149182	38.5977	0	0	37.2832	-0.599539	0.213899	-2.80291	0.00506431	0.701756	37.2832	0.865352	0.275719	3.13853	0.001698	0.00287694	37.2832	-1.12809	0.248042	-4.54799	5.41607e-06	2.85164e-05	37.2832	-0.129205	0.374444	-0.345059	0.73005	0.85562	0.265812	0.736146
WBGene00003409	mrp-3	E03G2.2	30.897	5.39747	0.1822	29.6239	7.36413e-193	1.38103e-192	30.897	-0.366427	0.258912	-1.41526	0.156994	0.973531	30.897	1.20994	0.326333	3.70768	0.000209166	0.000410934	30.897	-1.32279	0.303083	-4.36446	1.27436e-05	6.10091e-05	30.897	-0.100798	0.422763	-0.238428	0.811549	0.899466	0.843511	1.10914
WBGene00003410	mrp-4	F21G4.2	200.967	7.84752	0.100818	77.8388	0	0	200.967	0.179314	0.141885	1.26379	0.206304	0.988437	200.967	-1.38541	0.161603	-8.57291	1.009e-17	9.605e-17	200.967	0.263092	0.139815	1.88171	0.0598749	0.105914	200.967	0.388194	0.227059	1.70966	0.0873284	0.243575	-1.20609	-0.997215
WBGene00003411	mrp-5	F14F4.3	119.123	6.06598	0.116834	51.9196	0	0	119.123	-0.285995	0.165874	-1.72417	0.0846765	0.954102	119.123	2.3533	0.181535	12.9633	1.97523e-38	7.40661e-37	119.123	-0.448092	0.185696	-2.41304	0.0158202	0.0336106	119.123	-0.528651	0.236855	-2.23196	0.0256173	0.104956	2.0673	1.82465
WBGene00003412	mrp-6	F20B6.3	31.7544	5.40978	0.255699	21.1568	2.38698e-99	3.24487e-99	31.7544	-0.688035	0.364366	-1.88831	0.0589847	0.894412	31.7544	1.39871	0.387794	3.60683	0.000309957	0.000593636	31.7544	-1.27246	0.384448	-3.30984	0.000933499	0.00284949	31.7544	-0.0599712	0.538667	-0.111333	0.911353	0.957746	0.710673	1.33874
WBGene00003413	mrp-7	Y43F8C.12	111.212	6.64797	0.118967	55.8807	0	0	111.212	0.128853	0.167061	0.771297	0.440531	0.99478	111.212	-1.41842	0.199009	-7.1274	1.02283e-12	6.14778e-12	111.212	0.670697	0.165554	4.05123	5.0949e-05	0.000214328	111.212	0.90494	0.270684	3.34316	0.000828312	0.00887915	-1.28957	-0.513479
WBGene00003415	mars-1	F58B3.5	103.571	6.71693	0.0798803	84.0874	0	0	103.571	0.217642	0.110855	1.96331	0.0496103	0.859796	103.571	-0.376523	0.152692	-2.46589	0.0136673	0.019874	103.571	0.165627	0.122785	1.34892	0.177363	0.259802	103.571	-0.26197	0.209148	-1.25256	0.210366	0.428343	-0.158881	-0.638493
WBGene00003418	msh-2	H26D21.2	68.6368	6.32517	0.149996	42.1689	0	0	68.6368	0.0489567	0.211229	0.23177	0.816716	0.99478	68.6368	-1.65437	0.259704	-6.37021	1.88765e-10	8.6341e-10	68.6368	0.377813	0.209429	1.80401	0.0712294	0.121913	68.6368	0.47388	0.361925	1.30933	0.190422	0.402176	-1.60542	-1.18049
WBGene00003421	msh-5	F09E8.3	37.3298	6.18675	0.11604	53.3157	0	0	37.3298	-0.0360161	0.163259	-0.220606	0.825399	0.99478	37.3298	-0.289413	0.310271	-0.932774	0.350937	0.39472	37.3298	-1.64997	0.218993	-7.53436	4.90728e-14	8.23865e-13	37.3298	0.12362	0.393792	0.313923	0.75358	0.86795	-0.325429	-0.165793
WBGene00003422	msh-6	Y47G6A.11	99.9374	7.18591	0.10108	71.0911	0	0	99.9374	0.00275763	0.14235	0.0193721	0.984544	0.998148	99.9374	-1.48489	0.211802	-7.01074	2.37059e-12	1.37023e-11	99.9374	-0.389453	0.150552	-2.58684	0.00968613	0.021908	99.9374	1.01772	0.272338	3.73695	0.000186263	0.00291197	-1.48213	-0.467176
WBGene00003423	msi-1	R10E9.1	43.3757	4.9681	0.178199	27.8796	4.72204e-171	8.22489e-171	43.3757	-0.192415	0.252058	-0.763374	0.44524	0.99478	43.3757	0.49916	0.262837	1.89912	0.0575483	0.0753147	43.3757	0.50612	0.255658	1.97968	0.0477397	0.0875505	43.3757	-0.306401	0.380921	-0.804368	0.421184	0.637377	0.306746	0.19276
WBGene00003472	mtk-1	B0414.7	77.0181	6.64109	0.122116	54.3834	0	0	77.0181	-0.0323418	0.172103	-0.187921	0.850938	0.99478	77.0181	-0.584546	0.215759	-2.70925	0.00674348	0.0103261	77.0181	-0.308989	0.180649	-1.71043	0.0871862	0.144502	77.0181	0.268635	0.295097	0.910328	0.36265	0.586188	-0.616888	-0.315911
WBGene00003473	mtl-1	K11G9.6	20.5487	1.27128	0.35484	3.58268	0.000340084	0.000341286	20.5487	-0.929548	0.554128	-1.6775	0.0934454	0.954102	20.5487	2.65913	0.410981	6.4702	9.78711e-11	4.64636e-10	20.5487	1.61724	0.490994	3.29382	0.000988366	0.00299469	20.5487	0.503777	0.65353	0.770855	0.440793	0.651912	1.72958	3.16291
WBGene00003474	mtl-2	T08G5.10	398.662	6.6377	0.120561	55.0568	0	0	398.662	0.173704	0.169174	1.02678	0.304526	0.99478	398.662	3.35014	0.166146	20.1638	2.03806e-90	5.19143e-88	398.662	-0.228173	0.177639	-1.28448	0.198976	0.285571	398.662	-0.520551	0.224489	-2.31882	0.0204046	0.0898516	3.52384	2.82958
WBGene00003475	mtm-1	Y110A7A.5	28.7577	5.38548	0.195575	27.5366	6.40658e-167	1.10136e-166	28.7577	-0.192415	0.276627	-0.695573	0.486696	0.99478	28.7577	0.368884	0.338997	1.08816	0.276523	0.318769	28.7577	-0.910959	0.303533	-3.00119	0.00268931	0.00717522	28.7577	-0.230084	0.467502	-0.492156	0.622609	0.788978	0.176469	0.1388
WBGene00003476	mtm-3	T24A11.1	147.23	7.48782	0.0942746	79.4257	0	0	147.23	0.0911341	0.132581	0.687383	0.491842	0.99478	147.23	-0.95917	0.16264	-5.89751	3.69017e-09	1.45073e-08	147.23	0.00020063	0.135512	0.00148054	0.998819	0.999495	147.23	0.146588	0.22673	0.64653	0.517936	0.713662	-0.868036	-0.812582
WBGene00003477	mtm-5	H28G03.6	33.6689	5.6453	0.150142	37.5997	0	0	33.6689	-0.255353	0.212798	-1.19997	0.230149	0.993234	33.6689	1.65839	0.312389	5.30873	1.10391e-07	3.57032e-07	33.6689	-1.89279	0.286403	-6.60883	3.87371e-11	4.80119e-10	33.6689	-0.319257	0.372873	-0.856209	0.391882	0.612477	1.40304	1.33913
WBGene00003478	mtm-6	F53A2.8	44.1532	5.28939	0.184615	28.6509	1.56115e-180	2.81754e-180	44.1532	0.284668	0.2583	1.10208	0.270426	0.993234	44.1532	-1.1871	0.299303	-3.96621	7.30232e-05	0.000154429	44.1532	0.736065	0.256774	2.86659	0.0041492	0.0105182	44.1532	0.302669	0.417422	0.725091	0.468396	0.673828	-0.902431	-0.88443
WBGene00003479	mtm-9	Y39H10A.3	54.112	5.73029	0.261589	21.9057	2.29364e-106	3.19803e-106	54.112	0.217829	0.36868	0.590834	0.554632	0.99478	54.112	-2.04562	0.389731	-5.24881	1.53088e-07	4.83066e-07	54.112	0.766254	0.352737	2.17231	0.0298325	0.0584233	54.112	0.783885	0.555212	1.41187	0.157989	0.358724	-1.82779	-1.26174
WBGene00003480	klf-3	F54H5.4	28.2106	3.37872	0.204084	16.5555	1.46063e-61	1.73579e-61	28.2106	0.042697	0.283513	0.1506	0.880291	0.995157	28.2106	1.32567	0.27633	4.79744	1.60706e-06	4.38382e-06	28.2106	1.22142	0.290424	4.20564	2.60348e-05	0.000117987	28.2106	-1.16868	0.416641	-2.805	0.00503163	0.0334017	1.36837	0.156995
WBGene00003482	mua-3	K08E5.3	122.656	6.96946	0.149967	46.4733	0	0	122.656	-0.298128	0.212399	-1.40362	0.160432	0.973531	122.656	1.25824	0.215403	5.8413	5.17954e-09	1.99381e-08	122.656	-0.786675	0.217285	-3.62048	0.000294055	0.00102655	122.656	-0.0876659	0.302744	-0.289571	0.772144	0.878666	0.960108	1.17057
WBGene00003485	mua-6	W10G6.3	46.1385	3.64182	0.181752	20.0373	2.60673e-89	3.42145e-89	46.1385	-0.00858712	0.253234	-0.0339099	0.972949	0.998148	46.1385	1.66969	0.238819	6.99143	2.72096e-12	1.5654e-11	46.1385	1.26773	0.258109	4.9116	9.03347e-07	5.56085e-06	46.1385	-0.56286	0.344827	-1.6323	0.102617	0.270009	1.6611	1.10683
WBGene00003495	mup-2	T22E5.5	141.841	6.03395	0.209981	28.7357	1.36537e-181	2.47205e-181	141.841	0.26497	0.295554	0.89652	0.369975	0.99478	141.841	2.10193	0.271377	7.74543	9.52619e-15	7.00199e-14	141.841	0.204828	0.289387	0.707801	0.479069	0.574028	141.841	-1.59134	0.402058	-3.95798	7.55864e-05	0.00148128	2.3669	0.51059
WBGene00003497	mup-4	K07D8.1	133.164	6.52365	0.189202	34.4799	1.60697e-260	3.76368e-260	133.164	-0.214349	0.267659	-0.800828	0.423231	0.99478	133.164	1.63262	0.251578	6.48952	8.61109e-11	4.11983e-10	133.164	-0.234472	0.263739	-0.88903	0.373987	0.474111	133.164	-0.465595	0.36678	-1.26941	0.204294	0.420246	1.41827	1.16702
WBGene00003499	mut-2	K04F10.6	32.9719	5.75006	0.157696	36.463	4.28063e-291	1.1064e-290	32.9719	-0.0757549	0.222392	-0.340637	0.733377	0.99478	32.9719	-1.81714	0.38688	-4.69692	2.64113e-06	6.97285e-06	32.9719	-0.58286	0.241962	-2.40889	0.0160012	0.0339462	32.9719	1.25417	0.482648	2.59852	0.00936255	0.0521573	-1.8929	-0.562971
WBGene00003504	mut-7	ZK1098.8	39.5206	5.82623	0.140742	41.3964	0	0	39.5206	0.0892358	0.197469	0.451897	0.651343	0.99478	39.5206	-1.97119	0.345357	-5.7077	1.1451e-08	4.2252e-08	39.5206	-0.212954	0.212395	-1.00263	0.31604	0.415256	39.5206	1.09324	0.432654	2.52683	0.0115097	0.0605698	-1.88196	-0.877952
WBGene00003507	mut-14	C14C11.6	24.297	5.21471	0.175724	29.6756	1.58685e-193	2.98272e-193	24.297	-0.197741	0.248597	-0.795429	0.426364	0.99478	24.297	0.192729	0.351069	0.548977	0.583021	0.619637	24.297	-1.04935	0.291497	-3.59987	0.000318371	0.0010959	24.297	0.230666	0.45488	0.507092	0.61209	0.781569	-0.00501231	0.423395
WBGene00003508	mut-16	B0379.3	75.6713	6.35842	0.124505	51.0697	0	0	75.6713	0.468999	0.173491	2.70331	0.00686521	0.747418	75.6713	-0.510752	0.20937	-2.43947	0.0147088	0.0212828	75.6713	0.0897214	0.180934	0.495879	0.61998	0.703609	75.6713	-0.906513	0.304771	-2.97441	0.00293552	0.0227421	-0.0417523	-1.41726
WBGene00003509	mxl-1	T19B10.11	46.4159	5.33572	0.167518	31.8517	1.24837e-222	2.56658e-222	46.4159	0.120746	0.234862	0.514114	0.607173	0.99478	46.4159	-1.63512	0.288921	-5.65941	1.51897e-08	5.51095e-08	46.4159	0.965022	0.231821	4.16279	3.14383e-05	0.000139149	46.4159	0.625235	0.398149	1.57036	0.116332	0.291661	-1.51438	-1.00989
WBGene00003510	mxl-2	F40G9.11	43.1894	5.16444	0.17452	29.5923	1.87632e-192	3.51341e-192	43.1894	-0.0461559	0.245742	-0.187823	0.851015	0.99478	43.1894	-2.43313	0.334054	-7.28364	3.24929e-13	2.06384e-12	43.1894	1.21654	0.238816	5.09407	3.50451e-07	2.36851e-06	43.1894	1.62264	0.436151	3.72036	0.000198941	0.00303984	-2.47928	-0.810489
WBGene00003511	mxl-3	F46G10.6	43.8392	3.81833	0.22823	16.7302	7.89418e-63	9.42683e-63	43.8392	0.0979239	0.318733	0.307228	0.75867	0.99478	43.8392	2.82813	0.325944	8.67673	4.07298e-18	3.9951e-17	43.8392	0.158772	0.347416	0.45701	0.647664	0.727871	43.8392	-1.39341	0.440638	-3.16226	0.00156549	0.014253	2.92605	1.43472
WBGene00003514	myo-2	T18D3.4	93.2808	6.18932	0.151754	40.7852	0	0	93.2808	0.0348308	0.213692	0.162996	0.870522	0.99478	93.2808	1.09096	0.219134	4.97848	6.40844e-07	1.84919e-06	93.2808	-0.168999	0.2198	-0.768874	0.441968	0.540175	93.2808	-0.4558	0.308858	-1.47576	0.140008	0.330405	1.12579	0.635155
WBGene00003515	myo-3	K12F2.1	79.916	6.41012	0.115816	55.3477	0	0	79.916	-0.276259	0.164254	-1.6819	0.0925883	0.954102	79.916	0.993558	0.192755	5.15451	2.54292e-07	7.79443e-07	79.916	-0.600216	0.181729	-3.30281	0.000957221	0.00291467	79.916	-0.307215	0.262491	-1.17038	0.241847	0.463251	0.717299	0.686343
WBGene00003516	nab-1	C43E11.6	22.3701	3.89879	0.230094	16.9443	2.12043e-64	2.5461e-64	22.3701	-0.168649	0.325121	-0.518725	0.603952	0.99478	22.3701	1.66399	0.416163	3.99842	6.3768e-05	0.000136143	22.3701	-0.847127	0.396597	-2.13599	0.0326804	0.0631468	22.3701	0.973379	0.480148	2.02725	0.0426369	0.151262	1.49534	2.63737
WBGene00003518	nac-2	R107.1	15.8137	3.77204	0.298228	12.6482	1.14519e-36	1.2553e-36	15.8137	-0.353391	0.423914	-0.833639	0.404484	1	15.8137	2.67719	0.554228	4.83048	1.36207e-06	3.75237e-06	15.8137	-1.77786	0.547475	-3.24738	0.00116473	0.00344875	15.8137	0.186586	0.620611	0.30065	0.763682	0.874413	2.3238	2.86377
WBGene00003519	nac-3	K08E5.2	19.436	3.92795	0.253215	15.5123	2.86318e-54	3.32343e-54	19.436	0.163916	0.354057	0.462965	0.643389	1	19.436	1.6604	0.397196	4.1803	2.9113e-05	6.55608e-05	19.436	-0.364654	0.394922	-0.923356	0.355822	0.454593	19.436	-1.51295	0.557771	-2.7125	0.00667778	0.0409315	1.82431	0.147443
WBGene00003522	nas-3	K06A4.1	48.5884	3.66228	0.234241	15.6346	4.22967e-55	4.92273e-55	48.5884	-1.31497	0.358583	-3.66715	0.000245274	0.109339	48.5884	3.30293	0.344411	9.59009	8.8011e-22	1.13462e-20	48.5884	-0.0552815	0.368314	-0.150093	0.880691	0.913288	48.5884	0.609662	0.460593	1.32365	0.185621	0.395517	1.98796	3.91259
WBGene00003528	nas-9	C37H5.9	25.513	3.8229	0.250056	15.2881	9.17322e-53	1.05829e-52	25.513	-0.188057	0.353639	-0.531777	0.594881	0.99478	25.513	1.01442	0.356803	2.84309	0.00446784	0.00703408	25.513	0.580037	0.359645	1.61281	0.106787	0.170264	25.513	-0.248451	0.50999	-0.487167	0.62614	0.791291	0.826367	0.765973
WBGene00003530	nas-11	K11G12.1	138.339	5.68852	0.163021	34.8945	9.01226e-267	2.15798e-266	138.339	-0.312509	0.231327	-1.35094	0.176714	0.978652	138.339	2.46587	0.228259	10.8029	3.33424e-27	6.4987e-26	138.339	-0.156197	0.239993	-0.650842	0.515148	0.608025	138.339	0.270198	0.310725	0.869572	0.384534	0.607449	2.15336	2.73606
WBGene00003539	nas-20	T11F9.3	60.5733	3.7915	0.267373	14.1806	1.20844e-45	1.35995e-45	60.5733	-0.204715	0.378359	-0.541059	0.588467	0.99478	60.5733	4.48877	0.427162	10.5084	7.906e-26	1.38065e-24	60.5733	-1.00319	0.452294	-2.218	0.0265551	0.0528454	60.5733	-0.519783	0.498311	-1.04309	0.296906	0.522533	4.28405	3.96898
WBGene00003555	nas-39	F38E9.2	14.553	4.49539	0.293941	15.2935	8.44362e-53	9.74578e-53	14.553	-0.769445	0.421069	-1.82736	0.0676453	1	14.553	0.875406	0.511242	1.71231	0.0868394	0.109918	14.553	-1.44708	0.470629	-3.07478	0.00210661	0.00579141	14.553	0.831677	0.661745	1.25679	0.208829	1	0.105961	1.70708
WBGene00003559	ncl-1	ZK112.2	251.975	7.25277	0.0971204	74.6781	0	0	251.975	0.0222699	0.136696	0.162916	0.870585	0.99478	251.975	0.958005	0.133917	7.15372	8.44547e-13	5.13049e-12	251.975	0.44322	0.136731	3.24155	0.00118882	0.00351131	251.975	-0.44414	0.193641	-2.29362	0.0218123	0.094371	0.980275	0.513865
WBGene00003561	ncr-1	F02E8.6	25.2019	5.05762	0.209944	24.0904	3.15425e-128	4.75132e-128	25.2019	-0.510952	0.299489	-1.70608	0.0879929	0.954102	25.2019	1.49685	0.367773	4.07005	4.70037e-05	0.000102605	25.2019	-1.3861	0.349304	-3.96818	7.24249e-05	0.000291873	25.2019	-0.0941978	0.47578	-0.197986	0.843056	0.919498	0.9859	1.40265
WBGene00003564	ncs-2	F10G8.5	94.9174	5.70518	0.122377	46.6195	0	0	94.9174	-0.0993574	0.172396	-0.576332	0.564391	0.99478	94.9174	1.06664	0.182286	5.85144	4.87341e-09	1.88481e-08	94.9174	0.39296	0.180706	2.17457	0.0296621	0.0581204	94.9174	0.0329642	0.249865	0.131928	0.895041	0.948774	0.967279	1.0996
WBGene00003566	ncx-1	Y113G7A.4	18.9242	4.70827	0.276002	17.0588	3.00526e-65	3.62152e-65	18.9242	-0.138731	0.390011	-0.355709	0.722058	1	18.9242	0.364526	0.4659	0.782413	0.433972	0.479042	18.9242	-1.046	0.422423	-2.4762	0.0132789	0.0288675	18.9242	0.163706	0.625301	0.261804	0.793472	0.890581	0.225796	0.528233
WBGene00003567	ncx-2	C10G8.5	29.6433	4.9987	0.229476	21.7831	3.35716e-105	4.6589e-105	29.6433	-0.312508	0.325429	-0.960294	0.336907	0.99478	29.6433	1.24433	0.353507	3.51995	0.000431635	0.000806803	29.6433	-0.708508	0.347019	-2.0417	0.0411812	0.0768778	29.6433	-0.641569	0.49827	-1.28759	0.197888	0.411422	0.931818	0.602756
WBGene00003576	ndc-80	W01B6.9	94.5872	7.0727	0.117433	60.2277	0	0	94.5872	0.0140135	0.165488	0.0846799	0.932516	0.995931	94.5872	-1.62955	0.220418	-7.393	1.43553e-13	9.45124e-13	94.5872	-0.0812279	0.167882	-0.483839	0.6285	0.711203	94.5872	0.361276	0.305336	1.18321	0.236727	0.45766	-1.61554	-1.26827
WBGene00003577	ndg-4	F56F3.2	129.337	5.36511	0.141868	37.8175	0	0	129.337	-0.187438	0.200628	-0.934258	0.350171	0.99478	129.337	2.43021	0.195887	12.4062	2.41995e-35	8.20009e-34	129.337	0.384404	0.208537	1.84334	0.0652793	0.113624	129.337	-0.495354	0.270997	-1.8279	0.0675651	0.206051	2.24277	1.93485
WBGene00003581	ndx-4	Y37H9A.6	18.326	3.57314	0.220854	16.1787	7.12449e-59	8.40713e-59	18.326	0.169279	0.306275	0.552703	0.580467	1	18.326	0.556161	0.348848	1.59428	0.110874	0.137443	18.326	0.598898	0.328257	1.82448	0.0680797	0.117556	18.326	-0.732211	0.496893	-1.47358	0.140595	0.331342	0.72544	-0.17605
WBGene00003582	dcap-2	F52G2.1	56.8283	5.97117	0.108498	55.0346	0	0	56.8283	0.0978906	0.151533	0.646001	0.518279	0.99478	56.8283	-1.49098	0.231548	-6.43921	1.20099e-10	5.62925e-10	56.8283	0.457165	0.160041	2.85655	0.00428274	0.0108048	56.8283	0.367307	0.311826	1.17792	0.238827	0.459872	-1.39309	-1.12368
WBGene00003583	ndx-6	EEED8.8	17.4447	4.63635	0.216691	21.3962	1.44992e-101	1.98344e-101	17.4447	-0.0670384	0.305387	-0.21952	0.826245	1	17.4447	-0.77574	0.412135	-1.88225	0.0598022	0.0779803	17.4447	-0.209342	0.325559	-0.643024	0.520208	0.613177	17.4447	-0.294771	0.595648	-0.494874	0.620689	0.787584	-0.842779	-1.07051
WBGene00003584	ndx-7	C43E11.7	22.4714	4.40875	0.179382	24.5775	2.2007e-133	3.37063e-133	22.4714	0.213249	0.249069	0.856183	0.391896	0.99478	22.4714	-1.64212	0.384033	-4.276	1.90285e-05	4.40914e-05	22.4714	0.667924	0.26107	2.55841	0.0105151	0.0236239	22.4714	0.670764	0.50021	1.34097	0.179931	0.387189	-1.42888	-0.971361
WBGene00003586	ndx-9	F13H10.2	36.8161	5.14728	0.12817	40.1597	0	0	36.8161	-0.0875425	0.180177	-0.48587	0.627059	0.99478	36.8161	0.422919	0.241677	1.74993	0.0801297	0.10202	36.8161	-0.113097	0.208429	-0.542618	0.587393	0.674004	36.8161	-0.139084	0.321829	-0.432167	0.66562	0.815554	0.335376	0.283835
WBGene00003587	ned-8	F45H11.2	30.0313	5.14031	0.158456	32.44	7.50592e-231	1.57922e-230	30.0313	0.0304179	0.222285	0.136842	0.891155	0.995157	30.0313	-0.0192952	0.298464	-0.0646481	0.948454	0.955178	30.0313	-0.339242	0.24964	-1.35892	0.174172	0.255939	30.0313	-0.0587326	0.400048	-0.146814	0.883279	0.94455	0.0111227	-0.0780277
WBGene00003588	nex-1	ZC155.1	222.557	6.40971	0.113571	56.4378	0	0	222.557	0.103159	0.159256	0.647761	0.51714	0.99478	222.557	1.01846	0.149591	6.80832	9.87428e-12	5.27795e-11	222.557	1.06916	0.156519	6.83088	8.43964e-12	1.14183e-10	222.557	-0.241146	0.218547	-1.10341	0.269851	0.495213	1.12162	0.777317
WBGene00003589	nex-2	T07C4.9	35.7777	4.93365	0.163106	30.2481	5.53022e-201	1.06496e-200	35.7777	-0.396807	0.232892	-1.70383	0.0884134	0.954102	35.7777	0.775261	0.279517	2.77358	0.00554438	0.00858443	35.7777	-0.254556	0.257335	-0.989198	0.322566	0.421883	35.7777	0.62467	0.362197	1.72467	0.0845872	0.238441	0.378454	1.39993
WBGene00003590	nex-3	C28A5.3	20.9326	2.24179	0.316926	7.07355	1.51018e-12	1.54233e-12	20.9326	0.212835	0.43639	0.487717	0.625751	0.99478	20.9326	2.05547	0.405824	5.06492	4.08566e-07	1.21599e-06	20.9326	1.26126	0.447035	2.82138	0.00478173	0.0119213	20.9326	-0.921702	0.583956	-1.57838	0.114479	0.288981	2.2683	1.13376
WBGene00003592	nfi-1	ZK1290.4	31.1583	5.27285	0.161151	32.7199	8.13311e-235	1.7384e-234	31.1583	0.120892	0.225678	0.535684	0.592177	0.99478	31.1583	-0.094282	0.310794	-0.303359	0.761617	0.786202	31.1583	-0.550232	0.255908	-2.15012	0.031546	0.0611468	31.1583	0.0348854	0.408543	0.0853898	0.931951	0.967977	0.0266101	-0.0593966
WBGene00003593	nfm-1	F42A10.2	15.4555	3.69647	0.21079	17.5362	7.57692e-69	9.24677e-69	15.4555	-0.104682	0.296593	-0.35295	0.724126	1	15.4555	0.412613	0.368125	1.12085	0.262352	0.304046	15.4555	0.225646	0.327728	0.688516	0.491128	0.585817	15.4555	-0.247309	0.5074	-0.487404	0.625972	0.791222	0.30793	0.165304
WBGene00003594	nft-1	Y56A3A.13	34.4818	4.89057	0.147632	33.1268	1.22079e-240	2.66332e-240	34.4818	-0.00813484	0.206844	-0.0393283	0.968629	0.998148	34.4818	-0.284422	0.255559	-1.11294	0.265734	0.307339	34.4818	0.570892	0.217912	2.61983	0.0087973	0.020207	34.4818	-0.294032	0.366344	-0.802611	0.4222	0.638037	-0.292557	-0.578454
WBGene00003596	ngp-1	T19A6.2	91.5861	6.3173	0.129225	48.8862	0	0	91.5861	0.0110938	0.181859	0.0610024	0.951357	0.996752	91.5861	0.477884	0.195556	2.44373	0.0145365	0.0210634	91.5861	0.0435317	0.187755	0.231854	0.816651	0.86551	91.5861	-0.317594	0.276493	-1.14865	0.2507	0.473711	0.488978	0.160291
WBGene00003597	nhl-1	F54G8.4	30.9269	5.13458	0.305747	16.7935	2.72091e-63	3.25285e-63	30.9269	-0.552325	0.434335	-1.27166	0.203495	0.9868	30.9269	1.25239	0.436327	2.8703	0.0041008	0.00649778	30.9269	-0.909285	0.441114	-2.06134	0.0392706	0.0738523	30.9269	0.0345467	0.618919	0.0558179	0.955487	0.97971	0.700066	1.28694
WBGene00003598	nhl-2	F26F4.7	72.0949	6.52411	0.132354	49.2928	0	0	72.0949	0.116885	0.186058	0.628216	0.529862	0.99478	72.0949	-0.111721	0.224882	-0.4968	0.61933	0.654598	72.0949	-0.526291	0.19785	-2.66005	0.00781279	0.018214	72.0949	-0.0695785	0.307794	-0.226055	0.821159	0.9055	0.0051634	-0.1813
WBGene00003600	nhr-1	R09G11.2	29.3329	5.07939	0.178268	28.4929	1.43375e-178	2.56319e-178	29.3329	-0.15321	0.251836	-0.608374	0.54294	0.99478	29.3329	0.925469	0.313871	2.94856	0.00319253	0.00515819	29.3329	-0.784084	0.288545	-2.71737	0.00658025	0.0156953	29.3329	-0.32733	0.417859	-0.783352	0.433421	0.646784	0.772259	0.598139
WBGene00003602	nhr-3	H01A20.1	14.764	3.69254	0.287762	12.8319	1.08663e-37	1.19555e-37	14.764	-0.0267726	0.404928	-0.066117	0.947285	1	14.764	1.67244	0.477092	3.50548	0.000455782	0.000849575	14.764	-0.778427	0.465695	-1.67154	0.0946153	0.154118	14.764	-0.655387	0.623131	-1.05176	0.292908	1	1.64566	1.01705
WBGene00003607	nhr-8	F33D4.1	36.3871	4.6045	0.168107	27.3903	3.58325e-165	6.11586e-165	36.3871	0.0474983	0.235078	0.202054	0.839875	0.99478	36.3871	2.08611	0.292581	7.13003	1.00345e-12	6.03621e-12	36.3871	-0.650997	0.288399	-2.25728	0.0239909	0.0483417	36.3871	-0.661187	0.358939	-1.84206	0.0654666	0.202333	2.13361	1.42493
WBGene00003610	nhr-11	ZC410.1	12.0077	3.00072	0.291427	10.2967	7.29441e-25	7.70209e-25	12.0077	-0.591335	0.421876	-1.40168	0.161011	1	12.0077	2.94108	0.557542	5.27509	1.32691e-07	4.23592e-07	12.0077	-1.24926	0.557645	-2.24025	0.025075	0.0502366	12.0077	-0.309111	0.627821	-0.492356	0.622468	1	2.34975	2.63197
WBGene00003612	nhr-13	Y5H2B.2	13.0101	4.06613	0.257745	15.7758	4.56711e-56	5.33648e-56	13.0101	-0.065231	0.363162	-0.179619	0.857451	1	13.0101	0.527368	0.446467	1.1812	0.237523	0.27736	13.0101	-0.545295	0.403262	-1.35221	0.176309	0.258616	13.0101	-1.23537	0.672871	-1.83597	0.0663624	1	0.462137	-0.708002
WBGene00003613	nhr-14	T01B10.4	30.3437	3.13651	0.243971	12.8561	7.95207e-38	8.75309e-38	30.3437	0.00457131	0.34078	0.0134143	0.989297	0.998148	30.3437	2.09111	0.324848	6.43718	1.21711e-10	5.69398e-10	30.3437	0.979078	0.351555	2.785	0.00535284	0.0131533	30.3437	-1.24492	0.472787	-2.63316	0.00845947	0.0486401	2.09568	0.846181
WBGene00003619	nhr-20	F43C1.4	16.7473	4.78836	0.255709	18.7258	3.04946e-78	3.85329e-78	16.7473	-0.0757739	0.360883	-0.209968	0.833693	1	16.7473	0.112743	0.478078	0.235825	0.813568	0.834814	16.7473	-1.29767	0.407007	-3.18833	0.00143096	0.0041275	16.7473	-0.15632	0.646221	-0.241899	0.808858	0.897898	0.0369692	-0.0435774
WBGene00003621	nhr-22	K06A1.4	14.9107	4.42867	0.207973	21.2945	1.27775e-100	1.74372e-100	14.9107	0.0247555	0.291921	0.0848021	0.932419	1	14.9107	0.77495	0.442554	1.75109	0.0799307	0.101854	14.9107	-1.35987	0.377122	-3.60592	0.000311045	0.0010757	14.9107	-0.315193	0.555709	-0.567191	0.570584	0.751241	0.799706	0.459757
WBGene00003622	nhr-23	C01H6.5	34.8753	5.6255	0.165884	33.9123	4.39095e-252	9.98951e-252	34.8753	-0.0659704	0.233894	-0.282052	0.777904	0.99478	34.8753	-1.11427	0.332975	-3.34641	0.000818643	0.00145894	34.8753	-0.384317	0.249279	-1.54171	0.123143	0.192032	34.8753	0.915713	0.431962	2.11989	0.0340152	0.129264	-1.18024	-0.19856
WBGene00003624	nhr-28	C11G6.4	12.2933	4.2172	0.237737	17.7389	2.09907e-70	2.58259e-70	12.2933	-0.571971	0.341131	-1.67669	0.093603	1	12.2933	1.78416	0.499181	3.57418	0.000351327	0.000667675	12.2933	-1.88128	0.460644	-4.08403	4.42609e-05	0.000189101	12.2933	-0.23081	0.603003	-0.382767	0.701892	1	1.21219	1.55335
WBGene00003625	nhr-31	C26B2.3	26.1838	4.12665	0.195658	21.0912	9.58444e-99	1.2998e-98	26.1838	-0.0362749	0.274588	-0.132106	0.8949	0.995157	26.1838	1.25741	0.304073	4.13523	3.546e-05	7.88272e-05	26.1838	0.218307	0.299031	0.730048	0.465361	0.561795	26.1838	-0.891236	0.428488	-2.07996	0.0375296	0.138954	1.22114	0.366178
WBGene00003627	nhr-34	F58G6.5	16.6205	4.61805	0.16906	27.3161	2.73198e-164	4.65646e-164	16.6205	-0.136941	0.238476	-0.574232	0.565811	1	16.6205	0.923842	0.364677	2.53331	0.011299	0.0166764	16.6205	-1.12552	0.313514	-3.59003	0.000330637	0.00113601	16.6205	-1.50875	0.555275	-2.71713	0.00658516	0.0405066	0.786901	-0.584909
WBGene00003628	nhr-35	C07A12.3	17.4797	4.62289	0.274104	16.8655	8.0777e-64	9.67882e-64	17.4797	-0.509823	0.390316	-1.30618	0.191492	1	17.4797	0.49953	0.451421	1.10657	0.268478	0.310222	17.4797	-0.886383	0.416842	-2.12642	0.0334681	0.0644486	17.4797	0.0845821	0.62724	0.134848	0.892732	0.94777	-0.0102924	0.584112
WBGene00003635	nhr-45	F16H11.5	10.5149	2.87114	0.36973	7.7655	8.13211e-15	8.36074e-15	10.5149	0.210914	0.516444	0.408397	0.682982	1	10.5149	1.54105	0.604421	2.54964	0.0107835	0.0159923	10.5149	-0.578411	0.589497	-0.981195	0.326497	0.425517	10.5149	0.0474287	0.757814	0.0625861	0.950096	1	1.75197	1.58848
WBGene00003636	nhr-46	C45E5.6	43.2007	5.27013	0.185092	28.473	2.52671e-178	4.51276e-178	43.2007	-0.122328	0.261325	-0.468107	0.639708	0.99478	43.2007	0.985109	0.281411	3.50061	0.000464196	0.000863949	43.2007	-0.231863	0.275156	-0.84266	0.399419	0.499493	43.2007	-0.450107	0.394237	-1.14172	0.253572	0.475883	0.862781	0.535002
WBGene00003638	nhr-48	ZK662.3	22.1113	5.16838	0.186354	27.7343	2.69845e-169	4.66934e-169	22.1113	-0.31843	0.264569	-1.20358	0.228752	0.993234	22.1113	0.651883	0.376188	1.73287	0.0831192	0.105571	22.1113	-1.46091	0.322985	-4.52315	6.09261e-06	3.1784e-05	22.1113	-0.00272176	0.486106	-0.0055991	0.995533	0.997198	0.333453	0.649161
WBGene00003639	nhr-49	K10C3.6	71.5289	6.05877	0.143474	42.229	0	0	71.5289	-0.0250265	0.202109	-0.123826	0.901453	0.995157	71.5289	-0.191374	0.219439	-0.872105	0.383151	0.427091	71.5289	0.338614	0.203828	1.66128	0.096658	0.156818	71.5289	-0.19772	0.316651	-0.624409	0.532359	0.723956	-0.2164	-0.389093
WBGene00003645	nhr-55	T01G6.7	17.7979	3.31537	0.242052	13.697	1.05868e-42	1.18169e-42	17.7979	-0.540736	0.350371	-1.54332	0.122753	1	17.7979	2.45587	0.418206	5.87239	4.29545e-09	1.67003e-08	17.7979	-0.540503	0.420968	-1.28395	0.199158	0.285722	17.7979	-0.0932639	0.507342	-0.183829	0.854148	0.927329	1.91513	2.3626
WBGene00003648	nhr-58	R11G11.2	25.9351	3.982	0.362484	10.9853	4.49588e-28	4.79651e-28	25.9351	-0.820746	0.519526	-1.5798	0.114154	0.955072	25.9351	2.10326	0.493657	4.26058	2.03901e-05	4.70798e-05	25.9351	-0.20221	0.518057	-0.390324	0.696297	0.769992	25.9351	-0.378956	0.716425	-0.528954	0.596837	0.769211	1.28252	1.72431
WBGene00003651	nhr-61	W01D2.2	15.6799	4.431	0.24848	17.8324	3.95711e-71	4.88571e-71	15.6799	-0.267145	0.352176	-0.758554	0.44812	1	15.6799	1.21903	0.447041	2.72689	0.00639344	0.00982082	15.6799	-1.28614	0.414852	-3.10024	0.00193366	0.00537393	15.6799	-0.747758	0.608214	-1.22943	0.21891	0.438915	0.951886	0.471272
WBGene00003653	nhr-63	C06C6.4	10.8206	3.72464	0.300241	12.4055	2.43988e-35	2.66657e-35	10.8206	-0.840837	0.434841	-1.93367	0.0531542	1	10.8206	2.27532	0.587536	3.87264	0.000107662	0.000220733	10.8206	-1.89146	0.564959	-3.34795	0.000814108	0.00252152	10.8206	0.20379	0.685292	0.297377	0.766179	1	1.43448	2.47911
WBGene00003654	nhr-64	C45E1.1	14.2812	4.09445	0.303412	13.4947	1.68059e-41	1.8705e-41	14.2812	-0.361098	0.430878	-0.838051	0.402002	1	14.2812	0.501643	0.495592	1.01221	0.311438	0.3541	14.2812	-0.636721	0.459283	-1.38634	0.165644	0.245705	14.2812	0.14295	0.680217	0.210153	0.833548	1	0.140545	0.644593
WBGene00003656	nhr-66	T09A12.4	49.9299	5.79259	0.12491	46.3739	0	0	49.9299	0.0855136	0.174855	0.489056	0.624802	0.99478	49.9299	-1.14422	0.250281	-4.57175	4.83658e-06	1.22523e-05	49.9299	0.229143	0.185582	1.23473	0.21693	0.305931	49.9299	0.503995	0.33214	1.51742	0.129161	0.313568	-1.05871	-0.640227
WBGene00003658	nhr-68	H12C20.3	37.0732	4.8992	0.231342	21.1773	1.54632e-99	2.10285e-99	37.0732	0.00214998	0.325895	0.00659715	0.994736	0.998148	37.0732	1.8121	0.351079	5.16151	2.44968e-07	7.51798e-07	37.0732	-0.753586	0.353462	-2.13202	0.0330054	0.0636747	37.0732	-0.50409	0.469954	-1.07264	0.283434	0.508996	1.81425	1.30801
WBGene00003659	nhr-69	T23H4.2	25.1718	4.45096	0.243108	18.3086	7.07065e-75	8.83473e-75	25.1718	-0.487878	0.346931	-1.40627	0.159644	0.973531	25.1718	1.75019	0.369246	4.7399	2.13819e-06	5.72482e-06	25.1718	-0.501178	0.371499	-1.34907	0.177315	0.259783	25.1718	-1.09235	0.533191	-2.0487	0.040491	0.146336	1.26231	0.65784
WBGene00003661	nhr-71	K11E4.5	17.8479	4.74716	0.200733	23.6491	1.2064e-123	1.7877e-123	17.8479	-0.0445666	0.282628	-0.157686	0.874704	1	17.8479	-0.419116	0.416171	-1.00708	0.313898	0.356568	17.8479	-0.734458	0.322515	-2.27729	0.0227692	0.0462585	17.8479	0.160051	0.552223	0.289831	0.771946	0.878666	-0.463682	-0.259064
WBGene00003670	nhr-80	H10E21.3	27.5826	3.82686	0.237574	16.108	2.24033e-58	2.63776e-58	27.5826	-0.177709	0.335828	-0.529168	0.596689	0.99478	27.5826	1.20578	0.342305	3.52253	0.000427457	0.000800209	27.5826	0.516621	0.346114	1.49263	0.135534	0.207672	27.5826	-0.109246	0.479403	-0.227878	0.819741	0.905134	1.02807	1.09653
WBGene00003676	nhr-86	Y40B10A.8	27.696	5.23988	0.239901	21.8419	9.29035e-106	1.29194e-105	27.696	-0.425493	0.340708	-1.24885	0.211719	0.988437	27.696	0.753616	0.391541	1.92474	0.0542613	0.071398	27.696	-1.16893	0.36755	-3.18033	0.00147108	0.0042333	27.696	0.595656	0.518731	1.14829	0.250847	0.473711	0.328123	1.34927
WBGene00003680	nhr-90	ZK488.2	14.1359	3.92696	0.224565	17.4869	1.80157e-68	2.19354e-68	14.1359	-0.404412	0.320949	-1.26005	0.207651	1	14.1359	1.55627	0.422581	3.68276	0.00023072	0.000451477	14.1359	-0.948435	0.395818	-2.39614	0.0165688	0.0350497	14.1359	-0.431689	0.543117	-0.794836	0.426709	1	1.15185	1.12458
WBGene00003687	nhr-97	H27C11.1	24.0616	4.39997	0.204221	21.5451	5.88493e-103	8.08781e-103	24.0616	-0.464655	0.292306	-1.58962	0.111921	0.955072	24.0616	0.900006	0.327474	2.74833	0.00598998	0.00923565	24.0616	-0.0655778	0.312045	-0.210155	0.833547	0.878375	24.0616	-0.159329	0.458487	-0.347511	0.728207	0.854162	0.435351	0.740677
WBGene00003690	nhr-100	C28D4.1	18.406	4.57891	0.261131	17.5349	7.75917e-69	9.46605e-69	18.406	-0.334392	0.370544	-0.902433	0.366827	1	18.406	0.766561	0.447083	1.71458	0.0864217	0.109446	18.406	-1.08037	0.411662	-2.62441	0.00867981	0.0199868	18.406	0.343841	0.58572	0.58704	0.557177	0.741857	0.432169	1.1104
WBGene00003691	nhr-101	H12C20.6	12.2053	3.67519	0.288853	12.7234	4.3833e-37	4.81049e-37	12.2053	-0.44412	0.412273	-1.07725	0.28137	1	12.2053	1.35196	0.485797	2.78297	0.00538643	0.00836091	12.2053	-0.729089	0.464852	-1.56843	0.11678	0.183505	12.2053	-0.347463	0.655391	-0.530162	0.596	1	0.907838	1.00449
WBGene00003694	nhr-104	R11E3.5	18.7765	4.05639	0.181451	22.3553	1.07242e-110	1.51733e-110	18.7765	0.128915	0.251862	0.511848	0.608757	1	18.7765	1.64723	0.350105	4.70496	2.53911e-06	6.72513e-06	18.7765	-0.694634	0.328603	-2.1139	0.0345237	0.0661033	18.7765	-1.152	0.448819	-2.56673	0.0102662	0.0558243	1.77614	0.495231
WBGene00003711	nhr-121	E02H9.8	11.1302	2.56997	0.315467	8.14656	3.74438e-16	3.86417e-16	11.1302	0.0113256	0.441136	0.0256736	0.979518	1	11.1302	1.03554	0.459294	2.25464	0.0241557	0.033693	11.1302	0.769986	0.459921	1.67417	0.0940971	0.153477	11.1302	-1.1155	0.682972	-1.6333	0.102406	1	1.04687	-0.0799524
WBGene00003721	nhr-131	T01G6.2	12.853	2.25684	0.33794	6.67825	2.41818e-11	2.46251e-11	12.853	0.400126	0.462798	0.86458	0.387269	1	12.853	1.98322	0.512106	3.87268	0.000107646	0.000220733	12.853	0.265963	0.526258	0.505385	0.613288	0.69816	12.853	-0.521886	0.652337	-0.800026	0.423696	1	2.38335	1.46133
WBGene00003729	nhx-1	B0395.1	8.60871	2.23953	0.358697	6.24351	4.27868e-10	4.34575e-10	8.60871	-0.312011	0.51099	-0.6106	0.541465	1	8.60871	0.849403	0.573073	1.48219	0.13829	0.168433	8.60871	0.352037	0.545636	0.645186	0.518807	0.611622	8.60871	0.843873	0.749533	1.12586	0.260223	1	0.537393	1.69328
WBGene00003730	nhx-2	B0495.4	35.1138	4.88053	0.189953	25.6933	1.38928e-145	2.22279e-145	35.1138	0.0408376	0.266756	0.15309	0.878328	0.995022	35.1138	1.82176	0.315624	5.77194	7.83652e-09	2.95198e-08	35.1138	-0.831913	0.309913	-2.68434	0.0072673	0.0170733	35.1138	-0.74445	0.407753	-1.82574	0.0678901	0.206611	1.8626	1.07731
WBGene00003733	nhx-5	F57C7.2	20.0563	3.95648	0.281812	14.0395	8.93965e-45	1.0033e-44	20.0563	-0.281782	0.399662	-0.705052	0.480778	1	20.0563	1.23673	0.436911	2.83062	0.00464583	0.00728326	20.0563	-0.388353	0.42819	-0.906963	0.364426	0.463741	20.0563	0.33812	0.581667	0.581296	0.561041	0.745305	0.954946	1.57485
WBGene00003738	nid-1	F54F3.1	143.508	5.72689	0.132635	43.1777	0	0	143.508	-0.0494165	0.186641	-0.264767	0.791189	0.99478	143.508	2.774	0.18834	14.7287	4.21562e-49	2.55252e-47	143.508	0.0151948	0.199708	0.0760851	0.939351	0.956179	143.508	-1.25567	0.25799	-4.86713	1.13228e-06	5.74985e-05	2.72459	1.51833
WBGene00003744	nlp-6	T23E7.4	19.2033	3.73385	0.286577	13.0291	8.35363e-39	9.21982e-39	19.2033	-0.430923	0.408733	-1.05429	0.291751	1	19.2033	1.07003	0.413325	2.58882	0.00963042	0.0144212	19.2033	0.289442	0.415082	0.697312	0.485608	0.580327	19.2033	-0.456814	0.602816	-0.7578	0.44857	0.656175	0.639103	0.613212
WBGene00003749	nlp-11	ZK1320.10	14.887	3.18037	0.248392	12.8038	1.56027e-37	1.71462e-37	14.887	-0.670779	0.363586	-1.8449	0.0650524	1	14.887	1.60561	0.405791	3.95675	7.59769e-05	0.000160217	14.887	0.00659714	0.39945	0.0165156	0.986823	0.991117	14.887	0.155901	0.538817	0.28934	0.772321	0.878666	0.934831	1.76151
WBGene00003750	nlp-12	M01D7.5	21.6829	3.02234	0.267826	11.2847	1.56156e-29	1.67469e-29	21.6829	-0.127595	0.377368	-0.33812	0.735273	0.99478	21.6829	1.31757	0.358005	3.68032	0.000232944	0.000455588	21.6829	1.17153	0.376846	3.10877	0.00187865	0.00524125	21.6829	-0.942768	0.539271	-1.74823	0.0804248	0.230064	1.18998	0.374803
WBGene00003751	nlp-13	E03D2.1	13.6996	3.42462	0.3194	10.722	8.02122e-27	8.5268e-27	13.6996	-0.18134	0.451622	-0.40153	0.68803	1	13.6996	0.81491	0.496772	1.64041	0.10092	0.126099	13.6996	-0.0876141	0.477595	-0.183448	0.854446	0.895036	13.6996	0.242585	0.672602	0.360666	0.718349	1	0.63357	1.05749
WBGene00003752	nlp-14	D1009.4	15.6775	3.78322	0.299114	12.6481	1.14636e-36	1.25641e-36	15.6775	-0.0795088	0.421766	-0.188514	0.850474	1	15.6775	1.05432	0.455449	2.31491	0.020618	0.0290881	15.6775	-0.195026	0.446341	-0.436944	0.662152	0.740547	15.6775	-0.781316	0.647482	-1.2067	0.227548	0.448711	0.974814	0.273007
WBGene00003753	nlp-15	CC4.2	19.0979	3.84309	0.230679	16.6599	2.56629e-62	3.05761e-62	19.0979	-0.124897	0.325297	-0.383948	0.701017	1	19.0979	1.59395	0.365926	4.35593	1.32501e-05	3.14419e-05	19.0979	-0.148532	0.362299	-0.409971	0.681827	0.757392	19.0979	-1.53595	0.536128	-2.8649	0.00417145	0.0293788	1.46905	0.0579964
WBGene00003755	nlp-17	Y45F10A.5	27.5084	4.30107	0.303241	14.1837	1.15611e-45	1.30127e-45	27.5084	-0.260387	0.429489	-0.606271	0.544335	0.99478	27.5084	1.54039	0.42612	3.61493	0.000300424	0.000577023	27.5084	-0.195887	0.437461	-0.447782	0.654311	0.733332	27.5084	-0.508699	0.607837	-0.836902	0.402648	0.621113	1.28001	1.0317
WBGene00003758	nlp-20	F45E4.8	42.7992	4.24774	0.221947	19.1385	1.20727e-81	1.53946e-81	42.7992	-0.284678	0.315064	-0.903556	0.366231	0.99478	42.7992	1.84221	0.305891	6.02245	1.71801e-09	7.03491e-09	42.7992	0.471498	0.320668	1.47036	0.141464	0.215286	42.7992	-0.776864	0.441651	-1.759	0.0785779	0.226833	1.55754	1.06535
WBGene00003759	nlp-21	Y47D3B.2	27.3024	4.08266	0.234593	17.4032	7.80778e-68	9.49088e-68	27.3024	0.0348577	0.329179	0.105893	0.915667	0.995157	27.3024	0.517643	0.345587	1.49787	0.134168	0.163845	27.3024	0.565624	0.336543	1.68069	0.0928239	0.151869	27.3024	-0.0694417	0.486254	-0.142809	0.886441	0.945274	0.552501	0.448201
[truncated: 6,123 more rows]
