# Supplementary material for: Neuronal temperature perception induces specific defenses that enable C. elegans to cope with the enhanced reactivity of hydrogen peroxide at high temperature
Source: eLife. 2022 Oct 13;11:e78941. doi: 10.7554/eLife.78941 (PMC9635881; doi:10.7554/eLife.78941)
Supplement: Supplementary file 1. [file elife-78941-supp1.xlsx]

## Sheet: Supplementary file 1
Supplementary file 1. Statistical analysis for Figure 2 and Figure 2—figure supplement 1.
		Temperature
Set	Genotype	egg → day 2 adult	survival assay	Mean survival ± SEM (days)	Mean survival in each petri plate				Median survival (days)	75th percentile (days)	N dead / initial N	Group	% Mean survival change vs. group a	P value (log-rank) vs. group a	Figure
Survival in 6 mM tBuOOH, E. coli OP50
	wild type	20°C	20°C	1.60 ± 0.02	1.66573	1.61211	1.492	1.62071	1.58	1.8	131 / 145	a			2A
	wild type	25°C	25°C	1.12 ± 0.02	1.1319	1.13999	1.04183	1.16892	1.15	1.27	86 / 86	b	-0.3	< 0.0001
	wild type	20°C	25°C	0.68 ± 0.01	0.76594	0.66501	0.59473	0.67635	0.69	0.74	140 / 140	a			2C
	wild type	25°C	25°C	1.05 ± 0.03	1.01523	1.0995	1.02926		1.05	1.15	65 / 65	b	0.54	< 0.0001
	wild type	20°C	20°C	1.58 ± 0.03	1.67359	1.66374	1.46526	1.50164	1.52	1.76	146 / 146	a			2D
	wild type	25°C	20°C	2.48 ± 0.08	2.49904	2.55201	2.38587	2.41872	2.25	3.09	131 / 131	b	0.57	< 0.0001
		Temperature
Set	Genotype	egg → day 0 adult	day 0 → day 1 adult	day 1 → day 2 adult	survival assay	Mean survival ± SEM (days)	Mean survival in each petri plate				Median survival (days)	75th percentile (days)	N dead / initial N	Group	% Mean survival change vs. group a	P value (log-rank) vs. group a	P value (log-rank) vs. group b	P value (log-rank) vs. group c	Figure
Survival in 6 mM tBuOOH, E. coli OP50
	wild type	25°C	25°C	25°C	25°C	1.03 ± 0.03	1.11461	1.01921	0.94514	1.05414	0.99	1.18	78 / 78	a					2S1A
	wild type	20°C	25°C	25°C	25°C	0.94 ± 0.02	0.92518	0.93622	0.92199	0.96354	0.93	1.06	133 / 133	b	-0.09	0.0034
	wild type	20°C	20°C	25°C	25°C	0.64 ± 0.02	0.70671	0.79931	0.47338	0.54352	0.63	0.76	127 / 127	c	-0.38	< 0.0001	< 0.0001
	wild type	20°C	20°C	20°C	25°C	0.64 ± 0.01	0.55307	0.56999	0.77874	0.64124	0.61	0.73	127 / 127	d	-0.38	< 0.0001	< 0.0001	> 0.05
	wild type	20°C	20°C	20°C	20°C	2.14 ± 0.04	2.20988	2.138	2.16987	2.01553	2.1	2.4	130 / 155	a					2S1B
	wild type	25°C	20°C	20°C	20°C	2.82 ± 0.07	2.70151	3.11808	2.63472	2.73377	2.72	3.26	119 / 129	b	0.32	< 0.0001
	wild type	25°C	25°C	20°C	20°C	3.29 ± 0.09	3.50545	3.00481	3.55509	3.04137	3.24	4.03	140 / 157	c	0.54	< 0.0001	< 0.0001
	wild type	25°C	25°C	25°C	20°C	3.26 ± 0.09	3.34871	3.57042	3.38931	2.80362	3.16	3.91	134 / 152	d	0.53	< 0.0001	< 0.0001	> 0.05
