# Supplementary material for: Neuronal temperature perception induces specific defenses that enable C. elegans to cope with the enhanced reactivity of hydrogen peroxide at high temperature
Source: eLife. 2022 Oct 13;11:e78941. doi: 10.7554/eLife.78941 (PMC9635881; doi:10.7554/eLife.78941)
Supplement: Supplementary file 2. [file elife-78941-supp2.xlsx]

## Sheet: Supplementary file 2
Supplementary file 2. Statistical analysis for Figure 3 and Figure 3—figure supplement 1.
		Temperature
Set	Genotype	egg → day 2 adult	survival assay	Mean survival ± SEM (days)	Median survival (days)	Mean survival in each petri plate				75th percentile (days)	N dead / initial N	Group	% Mean survival change vs. group a	P value (log-rank) vs. group a	P value (log-rank) vs. group b	P value (log-rank) vs. group c	Figure
Survival in 6 mM tBuOOH, E. coli OP50
	wild type	20°C	20°C	1.85 ± 0.03	1.91	1.98875	1.70144	1.88923	1.83353	2.09	134 / 134	a					3B
	tax-4(p678) III	20°C	20°C	4.80 ± 0.08	4.76	4.84744	4.64865	4.96624	4.81337	5.4	100 / 100	b	1.59	< 0.0001
	wild type	25°C	25°C	1.16 ± 0.02	1.17	1.25406	1.1011	1.1444	1.13613	1.29	138 / 151	a					3C
	tax-4(p678) III	25°C	25°C	1.72 ± 0.03	1.74	1.74069	1.83412	1.63081	1.61894	1.97	131 / 147	b	0.49	< 0.0001
	wild type	20°C	20°C	1.98 ± 0.04	2	2.18447	2.13674	1.68123	1.85978	2.28	134 / 134	a					3D
	AFD ablated	20°C	20°C	4.75 ± 0.12	4.69	4.80606	4.96569	4.47795		5.43	109 / 109	b	1.4	< 0.0001
	wild type	25°C	25°C	0.92 ± 0.02	0.89	0.87278	0.8544	0.97695	0.98306	1.06	137 / 137	a					3E
	AFD ablated	25°C	25°C	1.29 ± 0.03	1.27	1.33472	1.09398	1.40264	1.31022	1.47	138 / 138	b	0.39	< 0.0001
	wild type	20°C	20°C	1.68 ± 0.03	1.61	1.83593	1.54773	1.65828	1.69692	1.8	122 / 122	a					3H
	AFD ablated	20°C	20°C	3.13 ± 0.10	3.07	3.47331	3.46046	2.93382	2.74258	3.71	110 / 112	b	0.86	< 0.0001
	wild type	25°C	20°C	2.62 ± 0.06	2.53	2.33494	2.64484	2.77802	2.72449	2.97	120 / 120	c	0.55	< 0.0001	< 0.0001
	AFD ablated	25°C	20°C	2.58 ± 0.07	2.4	2.56225	2.75914	2.34692		3.06	90 / 90	d	0.54	< 0.0001	< 0.0001	> 0.05
	wild type	20°C	20°C	1.87 ± 0.03	1.84	1.74145	1.74201	1.96697	2.03972	2.13	145 / 153	a					3J
	gcy-23(oy150) gcy-8(oy44) gcy-18(nj38) IV	20°C	20°C	2.68 ± 0.06	2.69	3.11757	2.21979	2.72322	2.68712	3.08	137 / 145	b	0.43	< 0.0001
	wild type	25°C	25°C	1.18 ± 0.02	1.17	1.33441	1.19123	1.08927	1.16913	1.3	109 / 109	a					3K
	gcy-23(oy150) gcy-8(oy44) gcy-18(nj38) IV	25°C	25°C	1.04 ± 0.02	1.06	0.90524	1.08992	1.03634		1.14	66 / 66	b	-0.12	< 0.0001
	wild type	20°C	20°C	2.00 ± 0.04	2.01	2.0879	1.93868			2.14	62 / 62	a					3L
	gcy-8(oy44) IV	20°C	20°C	2.21 ± 0.07	2.21	2.47891	1.97216			2.48	51 / 51	b	0.1	< 0.0001
	gcy-18(nj38) IV	20°C	20°C	3.03 ± 0.05	3	3.08588	3.06485	2.93835		3.33	96 / 96	c	0.51	< 0.0001	< 0.0001
	gcy-23(oy150) IV	20°C	20°C	2.46 ± 0.05	2.42	2.52599	2.395			2.67	70 / 70	d	0.23	< 0.0001	> 0.05	< 0.0001
Survival in 1 mM H2O2, E. coli JI377
	wild type	20°C	20°C	0.78 ± 0.03	0.73	0.74557	0.9191	0.70724	0.78644	0.9	118 / 130	a					3S1
	AFD ablated	20°C	20°C	2.24 ± 0.09	2.02	2.06128	2.52816	2.08273		2.76	91 / 114	b	1.85	< 0.0001
