# Supplementary material for: Neuronal temperature perception induces specific defenses that enable C. elegans to cope with the enhanced reactivity of hydrogen peroxide at high temperature
Source: eLife. 2022 Oct 13;11:e78941. doi: 10.7554/eLife.78941 (PMC9635881; doi:10.7554/eLife.78941)
Supplement: Supplementary file 3. [file elife-78941-supp3.xlsx]

## Sheet: Supplementary file 3
Supplementary file 3. Statistical analysis of gene-set expression for Figures 6, 7, and 8; Figure 4—figure supplements 2, 4, and 5; Figure 6—figure supplement 1; and Figure 7—figure supplement 1.
		wild type 25°C vs. wild type 20°C				AFD(-) 20°C vs. wild type 20°C
Gene set	Gene set reference	Number of genes in set with expression	Fold change in gene expression log2(wild type 25°C / wild type 20°C) Mean ± SEM	P value vs. all genes (ANOVA)	Figure	Number of genes in set with expression	Fold change in gene expression log2(AFD(-) 20°C / wild type 20°C]) Mean ± SEM	P value vs. all genes (ANOVA)	Figure
All genes		18039	0.04 ± 0.01			7912	0.10 ± 0.02
Genes up at 25°C vs. 20°C	Gomez-Orte et al., 2018	173	0.54 ± 0.08	< 0.0001	4S2A	123	1.29 ± 0.15	< 0.0001	4S2A
Genes up at 15°C vs. 20°C	Gomez-Orte et al., 2018	30	-0.61 ± 0.17	< 0.0001	4S2B	30	2.23 ± 0.23	< 0.0001	4S2B
Genes up at 30°C vs. 25°C	McCarroll et al., 2004	47	-0.02 ± 0.10	> 0.05	4S2C	47	0.77 ± 0.18	0.0033	4S2C
Genes down after shift from 23°C to 17°C	Sugi et al., 2011	27	0.60 ± 0.25	0.016	4S2D	14	2.56 ± 0.55	< 0.0001	4S2D
Genes up after shift from 23°C to 17°C	Sugi et al., 2011	44	-0.21 ± 0.15	< 0.0001	4S2E	26	1.59 ± 0.22	< 0.0001	4S2E
Genes induced by 12 mM tBuOOH	Oliveira et al., 2009	129	0.51 ± 0.07	< 0.0001	4S4	129	1.59 ± 0.09	< 0.0001	4S4
Genes induced by 1 g/L acrylamide	Lewis et al., 2009	268	0.08 ± 0.05	> 0.05	4S5A	167	0.69 ± 0.11	< 0.0001	4S5A
Genes induced by formaldehyde	Yang et al., 2016	528	0.06 ± 0.04	> 0.05	4S5B	294	2.18 ± 0.09	< 0.0001	4S5B
Genes induced by 1 mg/L benzene	Eom et al., 2014	64	-0.08 ± 0.13	> 0.05	4S5C	49	2.89 ± 0.28	< 0.0001	4S5C
Genes induced by 0.35 mg/L silver nanoparticles	Starnes et al., 2016	33	-0.12 ± 0.13	> 0.05	4S5D	23	1.42 ± 0.23	< 0.0001	4S5D
Genes induced by 1 mM cadmium chloride	Huffman et al., 2004	421	0.00 ± 0.05	> 0.05	4S5E	344	0.97 ± 0.07	< 0.0001	4S5E
Genes induced by 2.3 mM sodium arsenite	Sahu et al., 2013	597	-0.04 ± 0.03	0.0063	4S5F	338	1.64 ± 0.06	< 0.0001	4S5F
Genes induced by 60 mJ/cm2 310nm UVB light	Mueller et al., 2014	518	0.03 ± 0.04	> 0.05	4S5G	342	1.29 ± 0.07	< 0.0001	4S5G
Genes induced by 120 Gy X-rays	Greiss et al., 2008	161	-0.09 ± 0.08	0.015	4S5H	133	1.73 ± 0.10	< 0.0001	4S5H
Genes induced by 120 Gy gamma-rays	Greiss et al., 2008	134	0.01 ± 0.09	> 0.05	4S5I	101	1.75 ± 0.11	< 0.0001	4S5I
Genes upregulated by daf-16(+) in wildtype	Kumar et al., 2015	37	0.55 ± 0.11	< 0.0001	6A	29	1.62 ± 0.22	< 0.0001	6B
Genes upregulated by daf-16(+) in daf-2(-)	Murphy et al., 2003	216	0.27 ± 0.07	< 0.0001	6S1A	146	1.53 ± 0.10	< 0.0001	6S1B
Genes upregulated by skn-1(+) in wildtype	Oliveira et al., 2009	285	-0.11 ± 0.05	0.0002	7S1A	196	1.68 ± 0.08	< 0.0001	7A
Genes upregulated by skn-1(+) in daf-2(-)	Ewald et al., 2015	341	0.06 ± 0.04	> 0.05	7S1B	109	1.78 ± 0.10	< 0.0001	7S1C
Gene set	Gene set reference	Number of genes in set with expression	fold change in gene expression induced by daf-16(mu86) in AFD(+) nematodes at 20°C log2([daf-16(-) effect]) Mean ± SEM	P value vs. all genes (ANOVA)	Figure
All genes		7387	-0.04 ± 0.00
Genes upregulated by daf-16(+) in wildtype	Kumar et al., 2015	27	-0.21 ± 0.06	0.0017	8D
Genes upregulated by daf-16(+) in daf-2(-)	Murphy et al., 2003	132	-0.16 ± 0.02	< 0.0001	8E
Gene set	Gene set reference	Number of genes in set with expression	additional fold change in gene expression induced by daf-16(mu86) in AFD(-) nematodes at 20°C log2([AFD(-) daf-16(-) interaction effect]) Mean ± SEM	P value vs. all genes (ANOVA)	Figure
All genes		7387	0.02 ± 0.01
Genes upregulated by daf-16(+) in daf-2(-)	Murphy et al., 2003	132	-0.24 ± 0.06	< 0.0001	8F
