# Supplementary material for: Neuronal temperature perception induces specific defenses that enable C. elegans to cope with the enhanced reactivity of hydrogen peroxide at high temperature
Source: eLife. 2022 Oct 13;11:e78941. doi: 10.7554/eLife.78941 (PMC9635881; doi:10.7554/eLife.78941)
Supplement: Supplementary file 4. [file elife-78941-supp4.xlsx]

## Sheet: A. Gene Ontology
Supplementary file 4A. Gene Ontology Analysis.
Dataset	Gene-set	Analysis	Term	Description	Expected	Observed	Enrichment Fold Change	P value	Q value
wildtype 25°C vs wildtype 20°C	508 genes upregulated >2x (q=0.01)	Gene Ontology Enrichment Analysis	GO:0044419	biological process involved in interspecies interaction between organisms	6.1	28	4.6	7.9e-12	2.4e-09
wildtype 25°C vs wildtype 20°C	508 genes upregulated >2x (q=0.01)	Gene Ontology Enrichment Analysis	GO:0009607	response to biotic stimulus	6.1	28	4.6	7.9e-12	2.4e-09
wildtype 25°C vs wildtype 20°C	508 genes upregulated >2x (q=0.01)	Gene Ontology Enrichment Analysis	GO:0002376	immune system process	6.2	28	4.5	1.2e-11	2.4e-09
wildtype 25°C vs wildtype 20°C	508 genes upregulated >2x (q=0.01)	Gene Ontology Enrichment Analysis	GO:0006952	defense response	6.1	27	4.4	4.8e-11	3.6e-09
wildtype 25°C vs wildtype 20°C	508 genes upregulated >2x (q=0.01)	Gene Ontology Enrichment Analysis	GO:0050830	defense response to Gram-positive bacterium	1.1	12	11	5e-11	3.6e-09
wildtype 25°C vs wildtype 20°C	508 genes upregulated >2x (q=0.01)	Gene Ontology Enrichment Analysis	GO:0005576	extracellular region	8.6	29	3.4	5.7e-09	2.8e-07
wildtype 25°C vs wildtype 20°C	629 genes downregulated >2x (q=0.01)	Gene Ontology Enrichment Analysis	GO:0003735	structural constituent of ribosome	5	78	16	6e-76	1.8e-73
wildtype 25°C vs wildtype 20°C	629 genes downregulated >2x (q=0.01)	Gene Ontology Enrichment Analysis	GO:0022625	cytosolic large ribosomal subunit	1.7	43	25	3.5e-60	5.3e-58
wildtype 25°C vs wildtype 20°C	629 genes downregulated >2x (q=0.01)	Gene Ontology Enrichment Analysis	GO:0043043	peptide biosynthetic process	13	91	7.1	2.1e-51	2.1e-49
wildtype 25°C vs wildtype 20°C	629 genes downregulated >2x (q=0.01)	Gene Ontology Enrichment Analysis	GO:0016072	rRNA metabolic process	5.3	40	7.5	5.7e-25	4.3e-23
wildtype 25°C vs wildtype 20°C	629 genes downregulated >2x (q=0.01)	Gene Ontology Enrichment Analysis	GO:0032040	small-subunit processome	1.2	14	11	2.1e-13	1.3e-11
wildtype 25°C vs wildtype 20°C	629 genes downregulated >2x (q=0.01)	Gene Ontology Enrichment Analysis	GO:0071826	ribonucleoprotein complex subunit organization	3.8	20	5.3	1.6e-10	8.1e-09
wildtype 25°C vs wildtype 20°C	629 genes downregulated >2x (q=0.01)	Gene Ontology Enrichment Analysis	GO:0031974	membrane-enclosed lumen	27	58	2.2	1.6e-08	7e-07
wildtype 25°C vs wildtype 20°C	629 genes downregulated >2x (q=0.01)	Gene Ontology Enrichment Analysis	GO:0030490	maturation of SSU-rRNA	1.4	10	7.3	6.4e-08	2.4e-06
wildtype 25°C vs wildtype 20°C	629 genes downregulated >2x (q=0.01)	Gene Ontology Enrichment Analysis	GO:0000375	RNA splicing via transesterification reactions	5.4	20	3.7	1.2e-07	4e-06
wildtype 25°C vs wildtype 20°C	629 genes downregulated >2x (q=0.01)	Gene Ontology Enrichment Analysis	GO:0003724	RNA helicase activity	1.8	11	6.2	1.3e-07	4e-06
wildtype 25°C vs wildtype 20°C	629 genes downregulated >2x (q=0.01)	Gene Ontology Enrichment Analysis	GO:0009059	macromolecule biosynthetic process	66	110	1.7	1.5e-07	4.2e-06
wildtype 25°C vs wildtype 20°C	629 genes downregulated >2x (q=0.01)	Gene Ontology Enrichment Analysis	GO:0006725	cellular aromatic compound metabolic process	83	131	1.6	1.6e-07	4.2e-06
wildtype 25°C vs wildtype 20°C	629 genes downregulated >2x (q=0.01)	Gene Ontology Enrichment Analysis	GO:0043226	organelle	200	271	1.4	2.3e-07	5.2e-06
wildtype 25°C vs wildtype 20°C	629 genes downregulated >2x (q=0.01)	Gene Ontology Enrichment Analysis	GO:0008152	metabolic process	200	274	1.3	2.4e-07	5.2e-06
wildtype 25°C vs wildtype 20°C	629 genes downregulated >2x (q=0.01)	Gene Ontology Enrichment Analysis	GO:0046483	heterocycle metabolic process	83	130	1.6	2.4e-07	5.2e-06
wildtype 25°C vs wildtype 20°C	629 genes downregulated >2x (q=0.01)	Gene Ontology Enrichment Analysis	GO:1901360	organic cyclic compound metabolic process	85	131	1.5	4.6e-07	8.7e-06
wildtype 25°C vs wildtype 20°C	629 genes downregulated >2x (q=0.01)	Gene Ontology Enrichment Analysis	GO:0030016	myofibril	3.6	14	3.9	3.1e-06	5.5e-05
wildtype 25°C vs wildtype 20°C	629 genes downregulated >2x (q=0.01)	Gene Ontology Enrichment Analysis	GO:0042302	structural constituent of cuticle	6.2	19	3.1	4.2e-06	7e-05
AFD-ablated 20°C vs wildtype 20°C	2001 genes upregulated >2x (q=0.01)	Gene Ontology Enrichment Analysis	GO:0002376	immune system process	48	149	3.1	3e-39	9e-37
AFD-ablated 20°C vs wildtype 20°C	2001 genes upregulated >2x (q=0.01)	Gene Ontology Enrichment Analysis	GO:0009607	response to biotic stimulus	47	146	3.1	2.7e-38	4.1e-36
AFD-ablated 20°C vs wildtype 20°C	2001 genes upregulated >2x (q=0.01)	Gene Ontology Enrichment Analysis	GO:0044419	biological process involved in interspecies interaction between organisms	47	146	3.1	2.7e-38	4.1e-36
AFD-ablated 20°C vs wildtype 20°C	2001 genes upregulated >2x (q=0.01)	Gene Ontology Enrichment Analysis	GO:0006952	defense response	47	146	3.1	7e-38	5.3e-36
AFD-ablated 20°C vs wildtype 20°C	2001 genes upregulated >2x (q=0.01)	Gene Ontology Enrichment Analysis	GO:0005576	extracellular region	66	174	2.6	2.1e-34	1.3e-32
AFD-ablated 20°C vs wildtype 20°C	2001 genes upregulated >2x (q=0.01)	Gene Ontology Enrichment Analysis	GO:0006082	organic acid metabolic process	50	134	2.7	4.2e-28	2.1e-26
AFD-ablated 20°C vs wildtype 20°C	2001 genes upregulated >2x (q=0.01)	Gene Ontology Enrichment Analysis	GO:0030016	myofibril	11	49	4.4	9e-22	3.9e-20
AFD-ablated 20°C vs wildtype 20°C	2001 genes upregulated >2x (q=0.01)	Gene Ontology Enrichment Analysis	GO:0098857	membrane microdomain	5.6	30	5.3	1.2e-17	4.5e-16
AFD-ablated 20°C vs wildtype 20°C	2001 genes upregulated >2x (q=0.01)	Gene Ontology Enrichment Analysis	GO:0031672	A band	4.3	24	5.6	2.2e-15	7.2e-14
AFD-ablated 20°C vs wildtype 20°C	2001 genes upregulated >2x (q=0.01)	Gene Ontology Enrichment Analysis	GO:0099081	supramolecular polymer	35	84	2.4	7.7e-15	2.3e-13
AFD-ablated 20°C vs wildtype 20°C	2001 genes upregulated >2x (q=0.01)	Gene Ontology Enrichment Analysis	GO:0000323	lytic vacuole	18	52	2.9	6.3e-14	1.7e-12
AFD-ablated 20°C vs wildtype 20°C	2001 genes upregulated >2x (q=0.01)	Gene Ontology Enrichment Analysis	GO:0016042	lipid catabolic process	17	49	2.8	1.7e-12	4.3e-11
AFD-ablated 20°C vs wildtype 20°C	2001 genes upregulated >2x (q=0.01)	Gene Ontology Enrichment Analysis	GO:0017171	serine hydrolase activity	15	43	2.9	2.3e-11	5.4e-10
AFD-ablated 20°C vs wildtype 20°C	2001 genes upregulated >2x (q=0.01)	Gene Ontology Enrichment Analysis	GO:0042579	microbody	8.2	29	3.5	6.3e-11	1.4e-09
AFD-ablated 20°C vs wildtype 20°C	2001 genes upregulated >2x (q=0.01)	Gene Ontology Enrichment Analysis	GO:0072329	monocarboxylic acid catabolic process	7.7	28	3.6	6.8e-11	1.4e-09
AFD-ablated 20°C vs wildtype 20°C	2001 genes upregulated >2x (q=0.01)	Gene Ontology Enrichment Analysis	GO:0003012	muscle system process	7.9	28	3.6	1e-10	1.9e-09
AFD-ablated 20°C vs wildtype 20°C	2001 genes upregulated >2x (q=0.01)	Gene Ontology Enrichment Analysis	GO:0005215	transporter activity	110	179	1.6	1.2e-10	2.2e-09
AFD-ablated 20°C vs wildtype 20°C	2001 genes upregulated >2x (q=0.01)	Gene Ontology Enrichment Analysis	GO:0003779	actin binding	14	39	2.8	2.6e-10	4.3e-09
AFD-ablated 20°C vs wildtype 20°C	2001 genes upregulated >2x (q=0.01)	Gene Ontology Enrichment Analysis	GO:0045177	apical part of cell	11	33	3.1	3.1e-10	4.9e-09
AFD-ablated 20°C vs wildtype 20°C	2001 genes upregulated >2x (q=0.01)	Gene Ontology Enrichment Analysis	GO:0055120	striated muscle dense body	11	32	3	1.8e-09	2.8e-08
AFD-ablated 20°C vs wildtype 20°C	2001 genes upregulated >2x (q=0.01)	Gene Ontology Enrichment Analysis	GO:0005506	iron ion binding	14	37	2.7	2.2e-09	3.1e-08
AFD-ablated 20°C vs wildtype 20°C	2001 genes upregulated >2x (q=0.01)	Gene Ontology Enrichment Analysis	GO:0055085	transmembrane transport	110	173	1.5	2.5e-09	3.4e-08
AFD-ablated 20°C vs wildtype 20°C	2001 genes upregulated >2x (q=0.01)	Gene Ontology Enrichment Analysis	GO:0050830	defense response to Gram-positive bacterium	8.2	26	3.2	8.8e-09	1.1e-07
AFD-ablated 20°C vs wildtype 20°C	2001 genes upregulated >2x (q=0.01)	Gene Ontology Enrichment Analysis	GO:0034440	lipid oxidation	5.3	19	3.6	4.7e-08	5.9e-07
AFD-ablated 20°C vs wildtype 20°C	2001 genes upregulated >2x (q=0.01)	Gene Ontology Enrichment Analysis	GO:0030312	external encapsulating structure	11	30	2.7	8.7e-08	1e-06
AFD-ablated 20°C vs wildtype 20°C	2001 genes upregulated >2x (q=0.01)	Gene Ontology Enrichment Analysis	GO:0140359	ABC-type transporter activity	6	20	3.4	9.7e-08	1.1e-06
AFD-ablated 20°C vs wildtype 20°C	2001 genes upregulated >2x (q=0.01)	Gene Ontology Enrichment Analysis	GO:0050801	ion homeostasis	17	39	2.3	1.4e-07	1.5e-06
AFD-ablated 20°C vs wildtype 20°C	2001 genes upregulated >2x (q=0.01)	Gene Ontology Enrichment Analysis	GO:0030414	peptidase inhibitor activity	9.9	27	2.7	2e-07	2.1e-06
AFD-ablated 20°C vs wildtype 20°C	2001 genes upregulated >2x (q=0.01)	Gene Ontology Enrichment Analysis	GO:0072330	monocarboxylic acid biosynthetic process	6.2	20	3.2	2e-07	2.1e-06
AFD-ablated 20°C vs wildtype 20°C	2001 genes upregulated >2x (q=0.01)	Gene Ontology Enrichment Analysis	GO:0009925	basal plasma membrane	5.3	18	3.4	2.7e-07	2.7e-06
AFD-ablated 20°C vs wildtype 20°C	2001 genes upregulated >2x (q=0.01)	Gene Ontology Enrichment Analysis	GO:0045861	negative regulation of proteolysis	10	27	2.7	3.3e-07	3.2e-06
AFD-ablated 20°C vs wildtype 20°C	2001 genes upregulated >2x (q=0.01)	Gene Ontology Enrichment Analysis	GO:0061135	endopeptidase regulator activity	9.5	26	2.7	3.3e-07	3.2e-06
AFD-ablated 20°C vs wildtype 20°C	2001 genes upregulated >2x (q=0.01)	Gene Ontology Enrichment Analysis	GO:0009986	cell surface	12	29	2.5	6.3e-07	5.7e-06
AFD-ablated 20°C vs wildtype 20°C	2001 genes upregulated >2x (q=0.01)	Gene Ontology Enrichment Analysis	GO:0030029	actin filament-based process	21	44	2.1	1.1e-06	9.6e-06
AFD-ablated 20°C vs wildtype 20°C	2001 genes upregulated >2x (q=0.01)	Gene Ontology Enrichment Analysis	GO:0070279	vitamin B6 binding	4.7	16	3.4	1.1e-06	9.6e-06
AFD-ablated 20°C vs wildtype 20°C	2001 genes upregulated >2x (q=0.01)	Gene Ontology Enrichment Analysis	GO:0016614	oxidoreductase activity acting on CH-OH group of donors	8.6	23	2.7	2.1e-06	1.8e-05
AFD-ablated 20°C vs wildtype 20°C	2001 genes upregulated >2x (q=0.01)	Gene Ontology Enrichment Analysis	GO:0022610	biological adhesion	12	29	2.3	2.8e-06	2.3e-05
AFD-ablated 20°C vs wildtype 20°C	2001 genes upregulated >2x (q=0.01)	Gene Ontology Enrichment Analysis	GO:0010927	cellular component assembly involved in morphogenesis	4	14	3.5	3.1e-06	2.4e-05
AFD-ablated 20°C vs wildtype 20°C	1832 genes downregulated >2x (q=0.01)	Gene Ontology Enrichment Analysis	GO:0051321	meiotic cell cycle	34	129	3.8	2.2e-49	6.5e-47
AFD-ablated 20°C vs wildtype 20°C	1832 genes downregulated >2x (q=0.01)	Gene Ontology Enrichment Analysis	GO:0048285	organelle fission	32	126	3.9	4.2e-49	6.5e-47
AFD-ablated 20°C vs wildtype 20°C	1832 genes downregulated >2x (q=0.01)	Gene Ontology Enrichment Analysis	GO:0031974	membrane-enclosed lumen	110	244	2.3	3.6e-37	3.6e-35
AFD-ablated 20°C vs wildtype 20°C	1832 genes downregulated >2x (q=0.01)	Gene Ontology Enrichment Analysis	GO:0000003	reproduction	130	269	2.1	1.8e-35	1.3e-33
AFD-ablated 20°C vs wildtype 20°C	1832 genes downregulated >2x (q=0.01)	Gene Ontology Enrichment Analysis	GO:0006260	DNA replication	15	64	4.3	1.4e-29	8.2e-28
AFD-ablated 20°C vs wildtype 20°C	1832 genes downregulated >2x (q=0.01)	Gene Ontology Enrichment Analysis	GO:0006725	cellular aromatic compound metabolic process	340	524	1.6	2.1e-26	1.1e-24
AFD-ablated 20°C vs wildtype 20°C	1832 genes downregulated >2x (q=0.01)	Gene Ontology Enrichment Analysis	GO:0043226	organelle	810	1093	1.3	2.6e-26	1.1e-24
AFD-ablated 20°C vs wildtype 20°C	1832 genes downregulated >2x (q=0.01)	Gene Ontology Enrichment Analysis	GO:0046483	heterocycle metabolic process	340	523	1.6	2.8e-26	1.1e-24
AFD-ablated 20°C vs wildtype 20°C	1832 genes downregulated >2x (q=0.01)	Gene Ontology Enrichment Analysis	GO:1901360	organic cyclic compound metabolic process	340	525	1.5	1.5e-24	4.8e-23
AFD-ablated 20°C vs wildtype 20°C	1832 genes downregulated >2x (q=0.01)	Gene Ontology Enrichment Analysis	GO:0051704	multi-organism process	49	120	2.4	2.8e-22	8.3e-21
AFD-ablated 20°C vs wildtype 20°C	1832 genes downregulated >2x (q=0.01)	Gene Ontology Enrichment Analysis	GO:0000775	chromosome centromeric region	10	44	4.4	6.1e-22	1.7e-20
AFD-ablated 20°C vs wildtype 20°C	1832 genes downregulated >2x (q=0.01)	Gene Ontology Enrichment Analysis	GO:0009792	embryo development ending in birth or egg hatching	51	119	2.3	1.9e-20	4.7e-19
AFD-ablated 20°C vs wildtype 20°C	1832 genes downregulated >2x (q=0.01)	Gene Ontology Enrichment Analysis	GO:0000375	RNA splicing via transesterification reactions	22	66	3	1.1e-18	2.6e-17
AFD-ablated 20°C vs wildtype 20°C	1832 genes downregulated >2x (q=0.01)	Gene Ontology Enrichment Analysis	GO:0051306	mitotic sister chromatid separation	5	25	5	1.1e-15	2.3e-14
AFD-ablated 20°C vs wildtype 20°C	1832 genes downregulated >2x (q=0.01)	Gene Ontology Enrichment Analysis	GO:0000428	DNA-directed RNA polymerase complex	11	38	3.3	1.9e-13	3.8e-12
AFD-ablated 20°C vs wildtype 20°C	1832 genes downregulated >2x (q=0.01)	Gene Ontology Enrichment Analysis	GO:0045495	pole plasm	10	35	3.4	5.3e-13	9.8e-12
AFD-ablated 20°C vs wildtype 20°C	1832 genes downregulated >2x (q=0.01)	Gene Ontology Enrichment Analysis	GO:0035770	ribonucleoprotein granule	17	45	2.7	3e-11	5.2e-10
AFD-ablated 20°C vs wildtype 20°C	1832 genes downregulated >2x (q=0.01)	Gene Ontology Enrichment Analysis	GO:0003697	single-stranded DNA binding	5.6	22	4	1e-10	1.7e-09
AFD-ablated 20°C vs wildtype 20°C	1832 genes downregulated >2x (q=0.01)	Gene Ontology Enrichment Analysis	GO:0009994	oocyte differentiation	8.1	27	3.4	2.7e-10	4.2e-09
AFD-ablated 20°C vs wildtype 20°C	1832 genes downregulated >2x (q=0.01)	Gene Ontology Enrichment Analysis	GO:0043632	modification-dependent macromolecule catabolic process	38	76	2	4.1e-10	6.1e-09
AFD-ablated 20°C vs wildtype 20°C	1832 genes downregulated >2x (q=0.01)	Gene Ontology Enrichment Analysis	GO:0016569	covalent chromatin modification	23	53	2.3	5.2e-10	7.4e-09
AFD-ablated 20°C vs wildtype 20°C	1832 genes downregulated >2x (q=0.01)	Gene Ontology Enrichment Analysis	GO:0000725	recombinational repair	7.8	26	3.4	5.5e-10	7.5e-09
AFD-ablated 20°C vs wildtype 20°C	1832 genes downregulated >2x (q=0.01)	Gene Ontology Enrichment Analysis	GO:0016887	ATP hydrolysis activity	24	54	2.2	1e-09	1.4e-08
AFD-ablated 20°C vs wildtype 20°C	1832 genes downregulated >2x (q=0.01)	Gene Ontology Enrichment Analysis	GO:0070727	cellular macromolecule localization	72	122	1.7	1.4e-09	1.7e-08
AFD-ablated 20°C vs wildtype 20°C	1832 genes downregulated >2x (q=0.01)	Gene Ontology Enrichment Analysis	GO:0071695	anatomical structure maturation	6.7	23	3.4	2.6e-09	3.2e-08
AFD-ablated 20°C vs wildtype 20°C	1832 genes downregulated >2x (q=0.01)	Gene Ontology Enrichment Analysis	GO:0050684	regulation of mRNA processing	6.7	23	3.4	2.6e-09	3.2e-08
AFD-ablated 20°C vs wildtype 20°C	1832 genes downregulated >2x (q=0.01)	Gene Ontology Enrichment Analysis	GO:0000132	establishment of mitotic spindle orientation	7	23	3.3	8e-09	8.9e-08
AFD-ablated 20°C vs wildtype 20°C	1832 genes downregulated >2x (q=0.01)	Gene Ontology Enrichment Analysis	GO:0051653	spindle localization	11	31	2.7	9.4e-09	1e-07
AFD-ablated 20°C vs wildtype 20°C	1832 genes downregulated >2x (q=0.01)	Gene Ontology Enrichment Analysis	GO:0045137	development of primary sexual characteristics	17	40	2.4	1.8e-08	1.9e-07
AFD-ablated 20°C vs wildtype 20°C	1832 genes downregulated >2x (q=0.01)	Gene Ontology Enrichment Analysis	GO:0035825	homologous recombination	6.3	21	3.3	1.9e-08	1.9e-07
AFD-ablated 20°C vs wildtype 20°C	1832 genes downregulated >2x (q=0.01)	Gene Ontology Enrichment Analysis	GO:0051028	mRNA transport	6	20	3.3	4e-08	3.8e-07
AFD-ablated 20°C vs wildtype 20°C	1832 genes downregulated >2x (q=0.01)	Gene Ontology Enrichment Analysis	GO:0051169	nuclear transport	13	32	2.5	7.9e-08	7.4e-07
AFD-ablated 20°C vs wildtype 20°C	1832 genes downregulated >2x (q=0.01)	Gene Ontology Enrichment Analysis	GO:0050657	nucleic acid transport	8.8	25	2.8	8.1e-08	7.4e-07
AFD-ablated 20°C vs wildtype 20°C	1832 genes downregulated >2x (q=0.01)	Gene Ontology Enrichment Analysis	GO:0003730	mRNA 3'-UTR binding	6.9	21	3.1	1.5e-07	1.3e-06
AFD-ablated 20°C vs wildtype 20°C	1832 genes downregulated >2x (q=0.01)	Gene Ontology Enrichment Analysis	GO:0031023	microtubule organizing center organization	7.5	22	2.9	1.8e-07	1.6e-06
AFD-ablated 20°C vs wildtype 20°C	1832 genes downregulated >2x (q=0.01)	Gene Ontology Enrichment Analysis	GO:0018394	peptidyl-lysine acetylation	6.6	20	3	3.1e-07	2.6e-06
AFD-ablated 20°C vs wildtype 20°C	1832 genes downregulated >2x (q=0.01)	Gene Ontology Enrichment Analysis	GO:0006475	internal protein amino acid acetylation	6.6	20	3	3.1e-07	2.6e-06
AFD-ablated 20°C vs wildtype 20°C	1832 genes downregulated >2x (q=0.01)	Gene Ontology Enrichment Analysis	GO:0044257	cellular protein catabolic process	47	81	1.7	3.3e-07	2.6e-06
AFD-ablated 20°C vs wildtype 20°C	1832 genes downregulated >2x (q=0.01)	Gene Ontology Enrichment Analysis	GO:0048566	embryonic digestive tract development	4.8	16	3.3	7.1e-07	5.4e-06
AFD-ablated 20°C vs wildtype 20°C	1832 genes downregulated >2x (q=0.01)	Gene Ontology Enrichment Analysis	GO:0009059	macromolecule biosynthetic process	270	344	1.3	7.3e-07	5.5e-06
AFD-ablated 20°C vs wildtype 20°C	1832 genes downregulated >2x (q=0.01)	Gene Ontology Enrichment Analysis	GO:0009952	anterior/posterior pattern specification	9.7	25	2.6	7.8e-07	5.7e-06
AFD-ablated 20°C vs wildtype 20°C	1832 genes downregulated >2x (q=0.01)	Gene Ontology Enrichment Analysis	GO:0051247	positive regulation of protein metabolic process	28	52	1.9	2.1e-06	1.5e-05
AFD-ablated 20°C vs wildtype 20°C	1832 genes downregulated >2x (q=0.01)	Gene Ontology Enrichment Analysis	GO:0051170	import into nucleus	6.4	18	2.8	4.7e-06	3.3e-05
AFD-ablated 20°C vs wildtype 20°C	1832 genes downregulated >2x (q=0.01)	Gene Ontology Enrichment Analysis	GO:0061458	reproductive system development	23	43	1.9	7.7e-06	5.2e-05
AFD-ablated 20°C vs wildtype 20°C	1832 genes downregulated >2x (q=0.01)	Gene Ontology Enrichment Analysis	GO:0048569	post-embryonic animal organ development	26	48	1.8	8.7e-06	5.8e-05

## Sheet: B. Tissue
Supplementary file 4B. Tissue Enrichment Analysis.
Dataset	Gene-set	Analysis	Term	Description	Expected	Observed	Enrichment Fold Change	P value	Q value
wildtype 25°C vs wildtype 20°C	508 genes upregulated >2x (q=0.01)	Tissue Enrichment Analysis	WBbt:0005730	epithelial system	110	158	1.5	1.1e-06	0.00034
wildtype 25°C vs wildtype 20°C	508 genes upregulated >2x (q=0.01)	Tissue Enrichment Analysis	WBbt:0005772	intestine	150	190	1.3	0.00011	0.017
wildtype 25°C vs wildtype 20°C	508 genes upregulated >2x (q=0.01)	Tissue Enrichment Analysis	WBbt:0004697	head mesodermal cell	66	97	1.5	0.00012	0.017
wildtype 25°C vs wildtype 20°C	629 genes downregulated >2x (q=0.01)	Tissue Enrichment Analysis	WBbt:0005784	germ line	230	395	1.7	2.3e-25	7.2e-23
wildtype 25°C vs wildtype 20°C	629 genes downregulated >2x (q=0.01)	Tissue Enrichment Analysis	WBbt:0005747	reproductive system	280	421	1.5	3e-17	4.7e-15
wildtype 25°C vs wildtype 20°C	629 genes downregulated >2x (q=0.01)	Tissue Enrichment Analysis	WBbt:0005779	striated muscle	48	111	2.3	4.6e-16	4.8e-14
wildtype 25°C vs wildtype 20°C	629 genes downregulated >2x (q=0.01)	Tissue Enrichment Analysis	WBbt:0006874	Psub1	8	30	3.7	1.6e-10	1.3e-08
wildtype 25°C vs wildtype 20°C	629 genes downregulated >2x (q=0.01)	Tissue Enrichment Analysis	WBbt:0008366	gonadal primordium	98	162	1.7	2.7e-10	1.7e-08
wildtype 25°C vs wildtype 20°C	629 genes downregulated >2x (q=0.01)	Tissue Enrichment Analysis	WBbt:0005772	intestine	230	322	1.4	2.2e-09	1.1e-07
wildtype 25°C vs wildtype 20°C	629 genes downregulated >2x (q=0.01)	Tissue Enrichment Analysis	WBbt:0004292	anal depressor muscle	16	35	2.2	6.4e-06	0.00028
wildtype 25°C vs wildtype 20°C	629 genes downregulated >2x (q=0.01)	Tissue Enrichment Analysis	WBbt:0005842	AVA	28	51	1.8	1.9e-05	0.00075
wildtype 25°C vs wildtype 20°C	629 genes downregulated >2x (q=0.01)	Tissue Enrichment Analysis	WBbt:0005737	muscular system	230	292	1.3	3.9e-05	0.0013
wildtype 25°C vs wildtype 20°C	629 genes downregulated >2x (q=0.01)	Tissue Enrichment Analysis	WBbt:0008406	cephalic sheath cell	24	45	1.8	4.6e-05	0.0014
wildtype 25°C vs wildtype 20°C	629 genes downregulated >2x (q=0.01)	Tissue Enrichment Analysis	WBbt:0007849	hermaphrodite	77	105	1.4	0.00062	0.018
AFD-ablated 20°C vs wildtype 20°C	2001 genes upregulated >2x (q=0.01)	Tissue Enrichment Analysis	WBbt:0005772	intestine	870	1394	1.6	3.1e-74	9.9e-72
AFD-ablated 20°C vs wildtype 20°C	2001 genes upregulated >2x (q=0.01)	Tissue Enrichment Analysis	WBbt:0004697	head mesodermal cell	400	712	1.8	8.1e-56	1.3e-53
AFD-ablated 20°C vs wildtype 20°C	2001 genes upregulated >2x (q=0.01)	Tissue Enrichment Analysis	WBbt:0005737	muscular system	870	1213	1.4	7.5e-34	7.8e-32
AFD-ablated 20°C vs wildtype 20°C	2001 genes upregulated >2x (q=0.01)	Tissue Enrichment Analysis	WBbt:0006831	PVD	360	537	1.5	1.1e-21	8.9e-20
AFD-ablated 20°C vs wildtype 20°C	2001 genes upregulated >2x (q=0.01)	Tissue Enrichment Analysis	WBbt:0005501	outer labial sensillum	370	543	1.5	3.9e-21	2.4e-19
AFD-ablated 20°C vs wildtype 20°C	2001 genes upregulated >2x (q=0.01)	Tissue Enrichment Analysis	WBbt:0008422	sex organ	220	311	1.4	1e-11	5.2e-10
AFD-ablated 20°C vs wildtype 20°C	2001 genes upregulated >2x (q=0.01)	Tissue Enrichment Analysis	WBbt:0007849	hermaphrodite	290	381	1.3	4.5e-09	2e-07
AFD-ablated 20°C vs wildtype 20°C	2001 genes upregulated >2x (q=0.01)	Tissue Enrichment Analysis	WBbt:0005736	excretory system	120	183	1.5	5.8e-09	2.3e-07
AFD-ablated 20°C vs wildtype 20°C	2001 genes upregulated >2x (q=0.01)	Tissue Enrichment Analysis	WBbt:0006850	excretory secretory system	120	183	1.5	6.3e-09	2.3e-07
AFD-ablated 20°C vs wildtype 20°C	2001 genes upregulated >2x (q=0.01)	Tissue Enrichment Analysis	WBbt:0005812	excretory cell	110	165	1.5	1.7e-08	5.2e-07
AFD-ablated 20°C vs wildtype 20°C	2001 genes upregulated >2x (q=0.01)	Tissue Enrichment Analysis	WBbt:0008406	cephalic sheath cell	92	136	1.5	1.2e-06	3.5e-05
AFD-ablated 20°C vs wildtype 20°C	2001 genes upregulated >2x (q=0.01)	Tissue Enrichment Analysis	WBbt:0005798	anal sphincter muscle	16	36	2.2	1.3e-06	3.5e-05
AFD-ablated 20°C vs wildtype 20°C	2001 genes upregulated >2x (q=0.01)	Tissue Enrichment Analysis	WBbt:0004292	anal depressor muscle	60	93	1.6	5.4e-06	0.00013
AFD-ablated 20°C vs wildtype 20°C	2001 genes upregulated >2x (q=0.01)	Tissue Enrichment Analysis	WBbt:0005237	touch receptor neuron	250	305	1.2	4.5e-05	0.001
AFD-ablated 20°C vs wildtype 20°C	2001 genes upregulated >2x (q=0.01)	Tissue Enrichment Analysis	WBbt:0005749	coelomic system	110	152	1.3	0.00013	0.0027
AFD-ablated 20°C vs wildtype 20°C	2001 genes upregulated >2x (q=0.01)	Tissue Enrichment Analysis	WBbt:0005785	somatic gonad	72	102	1.4	0.00014	0.0027
AFD-ablated 20°C vs wildtype 20°C	2001 genes upregulated >2x (q=0.01)	Tissue Enrichment Analysis	WBbt:0003681	pharynx	650	740	1.1	0.00014	0.0027
AFD-ablated 20°C vs wildtype 20°C	2001 genes upregulated >2x (q=0.01)	Tissue Enrichment Analysis	WBbt:0006791	uv1	6	15	2.5	0.00014	0.0027
AFD-ablated 20°C vs wildtype 20°C	2001 genes upregulated >2x (q=0.01)	Tissue Enrichment Analysis	WBbt:0006769	lateral nerve cord	52	76	1.5	0.00021	0.0035
AFD-ablated 20°C vs wildtype 20°C	2001 genes upregulated >2x (q=0.01)	Tissue Enrichment Analysis	WBbt:0005342	uterine muscle	17	31	1.8	0.00026	0.0041
AFD-ablated 20°C vs wildtype 20°C	2001 genes upregulated >2x (q=0.01)	Tissue Enrichment Analysis	WBbt:0005730	epithelial system	650	723	1.1	0.00045	0.0067
AFD-ablated 20°C vs wildtype 20°C	2001 genes upregulated >2x (q=0.01)	Tissue Enrichment Analysis	WBbt:0006789	uterine seam cell	5.5	13	2.4	0.00063	0.009
AFD-ablated 20°C vs wildtype 20°C	2001 genes upregulated >2x (q=0.01)	Tissue Enrichment Analysis	WBbt:0006104	Eala	5	12	2.4	0.00078	0.011
AFD-ablated 20°C vs wildtype 20°C	2001 genes upregulated >2x (q=0.01)	Tissue Enrichment Analysis	WBbt:0005319	spermatheca	74	100	1.3	0.00095	0.012
AFD-ablated 20°C vs wildtype 20°C	2001 genes upregulated >2x (q=0.01)	Tissue Enrichment Analysis	WBbt:0006749	nerve ring	110	143	1.3	0.0013	0.016
AFD-ablated 20°C vs wildtype 20°C	2001 genes upregulated >2x (q=0.01)	Tissue Enrichment Analysis	WBbt:0006546	Ealp	5.2	12	2.3	0.0013	0.016
AFD-ablated 20°C vs wildtype 20°C	2001 genes upregulated >2x (q=0.01)	Tissue Enrichment Analysis	WBbt:0006750	dorsal nerve cord	76	100	1.3	0.0016	0.018
AFD-ablated 20°C vs wildtype 20°C	2001 genes upregulated >2x (q=0.01)	Tissue Enrichment Analysis	WBbt:0006161	Eara	5.4	12	2.2	0.0017	0.019
AFD-ablated 20°C vs wildtype 20°C	2001 genes upregulated >2x (q=0.01)	Tissue Enrichment Analysis	WBbt:0006646	Earp	5.4	12	2.2	0.0017	0.019
AFD-ablated 20°C vs wildtype 20°C	1832 genes downregulated >2x (q=0.01)	Tissue Enrichment Analysis	WBbt:0005784	germ line	860	1809	2.1	1.8e-224	5.5e-222
AFD-ablated 20°C vs wildtype 20°C	1832 genes downregulated >2x (q=0.01)	Tissue Enrichment Analysis	WBbt:0005747	reproductive system	1000	1813	1.7	1.2e-133	2e-131
AFD-ablated 20°C vs wildtype 20°C	1832 genes downregulated >2x (q=0.01)	Tissue Enrichment Analysis	WBbt:0004015	AB	15	59	4	1.1e-23	1.1e-21
AFD-ablated 20°C vs wildtype 20°C	1832 genes downregulated >2x (q=0.01)	Tissue Enrichment Analysis	WBbt:0006876	EMS	8.9	43	4.8	1.9e-22	1.5e-20
AFD-ablated 20°C vs wildtype 20°C	1832 genes downregulated >2x (q=0.01)	Tissue Enrichment Analysis	WBbt:0006875	Psub3	8.4	41	4.9	9.7e-22	6.1e-20
AFD-ablated 20°C vs wildtype 20°C	1832 genes downregulated >2x (q=0.01)	Tissue Enrichment Analysis	WBbt:0006874	Psub1	30	85	2.9	8.9e-21	4.6e-19
AFD-ablated 20°C vs wildtype 20°C	1832 genes downregulated >2x (q=0.01)	Tissue Enrichment Analysis	WBbt:0004575	Z3	6.8	34	5	5.7e-19	2.6e-17
AFD-ablated 20°C vs wildtype 20°C	1832 genes downregulated >2x (q=0.01)	Tissue Enrichment Analysis	WBbt:0004576	Z2	6.8	34	5	5.7e-19	2.6e-17
AFD-ablated 20°C vs wildtype 20°C	1832 genes downregulated >2x (q=0.01)	Tissue Enrichment Analysis	WBbt:0006797	oocyte	21	65	3.1	2.4e-18	8.5e-17
AFD-ablated 20°C vs wildtype 20°C	1832 genes downregulated >2x (q=0.01)	Tissue Enrichment Analysis	WBbt:0006873	Psub2	6	29	4.8	8.7e-16	2.7e-14
AFD-ablated 20°C vs wildtype 20°C	1832 genes downregulated >2x (q=0.01)	Tissue Enrichment Analysis	WBbt:0003810	C	5.4	22	4.1	1.7e-10	5e-09
AFD-ablated 20°C vs wildtype 20°C	1832 genes downregulated >2x (q=0.01)	Tissue Enrichment Analysis	WBbt:0005744	reproductive tract	240	308	1.3	3.5e-07	9.2e-06
AFD-ablated 20°C vs wildtype 20°C	1832 genes downregulated >2x (q=0.01)	Tissue Enrichment Analysis	WBbt:0006892	P4.p	7.8	20	2.6	1.2e-05	0.00029
AFD-ablated 20°C vs wildtype 20°C	1832 genes downregulated >2x (q=0.01)	Tissue Enrichment Analysis	WBbt:0006891	P3.p	7.8	20	2.6	1.2e-05	0.00029
AFD-ablated 20°C vs wildtype 20°C	1832 genes downregulated >2x (q=0.01)	Tissue Enrichment Analysis	WBbt:0006896	P8.p	7.9	20	2.5	1.6e-05	0.00033
AFD-ablated 20°C vs wildtype 20°C	1832 genes downregulated >2x (q=0.01)	Tissue Enrichment Analysis	WBbt:0006894	P6.p	8.9	21	2.4	3.5e-05	0.00068
AFD-ablated 20°C vs wildtype 20°C	1832 genes downregulated >2x (q=0.01)	Tissue Enrichment Analysis	WBbt:0006893	P5.p	8.9	20	2.3	0.00011	0.002
AFD-ablated 20°C vs wildtype 20°C	1832 genes downregulated >2x (q=0.01)	Tissue Enrichment Analysis	WBbt:0006895	P7.p	9	20	2.2	0.00014	0.0024
AFD-ablated 20°C vs wildtype 20°C	1832 genes downregulated >2x (q=0.01)	Tissue Enrichment Analysis	WBbt:0008378	somatic cell	8.4	18	2.1	0.00042	0.0069
AFD-ablated 20°C vs wildtype 20°C	1832 genes downregulated >2x (q=0.01)	Tissue Enrichment Analysis	WBbt:0008406	cephalic sheath cell	91	120	1.3	0.00069	0.011
AFD-ablated 20°C vs wildtype 20°C	1832 genes downregulated >2x (q=0.01)	Tissue Enrichment Analysis	WBbt:0006201	MSpapp	4.4	11	2.5	0.00087	0.013

## Sheet: C. Phenotype
Supplementary file 4C. Phenotype Enrichment Analysis.
Dataset	Gene-set	Analysis	Term	Description	Expected	Observed	Enrichment Fold Change	P value	Q value
wildtype 25°C vs wildtype 20°C	508 genes upregulated >2x (q=0.01)	Phenotype Enrichment Analysis	WBPhenotype:0000886	nematode phenotype	95	149	1.6	1.4e-08	3.4e-06
wildtype 25°C vs wildtype 20°C	508 genes upregulated >2x (q=0.01)	Phenotype Enrichment Analysis	WBPhenotype:0001655	cadmium hypersensitive	0.88	7	7.9	3.2e-06	0.00039
wildtype 25°C vs wildtype 20°C	508 genes upregulated >2x (q=0.01)	Phenotype Enrichment Analysis	WBPhenotype:0002539	antimicrobial gene expression increased	0.49	4	8.2	0.00013	0.01
wildtype 25°C vs wildtype 20°C	629 genes downregulated >2x (q=0.01)	Phenotype Enrichment Analysis	WBPhenotype:0000270	pleiotropic defects severe early emb	8.4	65	7.8	6.8e-43	1.6e-40
wildtype 25°C vs wildtype 20°C	629 genes downregulated >2x (q=0.01)	Phenotype Enrichment Analysis	WBPhenotype:0001941	rachis narrow	18	66	3.7	3.4e-21	4e-19
wildtype 25°C vs wildtype 20°C	629 genes downregulated >2x (q=0.01)	Phenotype Enrichment Analysis	WBPhenotype:0001946	pachytene progression during oogenesis variant	18	65	3.6	4.9e-20	3.9e-18
wildtype 25°C vs wildtype 20°C	629 genes downregulated >2x (q=0.01)	Phenotype Enrichment Analysis	WBPhenotype:0001979	gonad vesiculated	13	53	4	5.7e-19	3.4e-17
wildtype 25°C vs wildtype 20°C	629 genes downregulated >2x (q=0.01)	Phenotype Enrichment Analysis	WBPhenotype:0001944	oocyte number decreased	22	67	3.1	7.1e-17	3.4e-15
wildtype 25°C vs wildtype 20°C	629 genes downregulated >2x (q=0.01)	Phenotype Enrichment Analysis	WBPhenotype:0001792	nuclei small	11	43	4	4.2e-16	1.7e-14
wildtype 25°C vs wildtype 20°C	629 genes downregulated >2x (q=0.01)	Phenotype Enrichment Analysis	WBPhenotype:0001954	diplotene absent during oogenesis	7.1	34	4.8	1.6e-15	5.4e-14
wildtype 25°C vs wildtype 20°C	629 genes downregulated >2x (q=0.01)	Phenotype Enrichment Analysis	WBPhenotype:0001980	germ cell compartment expansion variant	27	73	2.7	2.3e-15	6.7e-14
wildtype 25°C vs wildtype 20°C	629 genes downregulated >2x (q=0.01)	Phenotype Enrichment Analysis	WBPhenotype:0001950	diplotene region organization variant	13	43	3.4	2.3e-13	6.1e-12
wildtype 25°C vs wildtype 20°C	629 genes downregulated >2x (q=0.01)	Phenotype Enrichment Analysis	WBPhenotype:0001827	RNA metabolism variant	10	37	3.6	1.7e-12	4.2e-11
wildtype 25°C vs wildtype 20°C	629 genes downregulated >2x (q=0.01)	Phenotype Enrichment Analysis	WBPhenotype:0001957	gonad small	5.6	26	4.6	4.2e-12	9.2e-11
wildtype 25°C vs wildtype 20°C	629 genes downregulated >2x (q=0.01)	Phenotype Enrichment Analysis	WBPhenotype:0001538	mRNA surveillance defective	7.1	29	4.1	1e-11	2e-10
wildtype 25°C vs wildtype 20°C	629 genes downregulated >2x (q=0.01)	Phenotype Enrichment Analysis	WBPhenotype:0000508	nonsense mRNA accumulation	6.9	28	4.1	2.7e-11	5e-10
wildtype 25°C vs wildtype 20°C	629 genes downregulated >2x (q=0.01)	Phenotype Enrichment Analysis	WBPhenotype:0000402	avoids bacterial lawn	28	66	2.3	7.5e-11	1.3e-09
wildtype 25°C vs wildtype 20°C	629 genes downregulated >2x (q=0.01)	Phenotype Enrichment Analysis	WBPhenotype:0001794	cytoplasmic processing body variant	16	45	2.8	1.5e-10	2.5e-09
wildtype 25°C vs wildtype 20°C	629 genes downregulated >2x (q=0.01)	Phenotype Enrichment Analysis	WBPhenotype:0001259	hermaphrodite fertility reduced	65	117	1.8	3.9e-10	5.9e-09
wildtype 25°C vs wildtype 20°C	629 genes downregulated >2x (q=0.01)	Phenotype Enrichment Analysis	WBPhenotype:0001942	rachis absent	5.4	22	4.1	2.5e-09	3.6e-08
wildtype 25°C vs wildtype 20°C	629 genes downregulated >2x (q=0.01)	Phenotype Enrichment Analysis	WBPhenotype:0000184	apoptosis fails to occur	5.9	23	3.9	3e-09	3.9e-08
wildtype 25°C vs wildtype 20°C	629 genes downregulated >2x (q=0.01)	Phenotype Enrichment Analysis	WBPhenotype:0000676	growth rate variant	120	168	1.4	2.2e-06	2.7e-05
wildtype 25°C vs wildtype 20°C	629 genes downregulated >2x (q=0.01)	Phenotype Enrichment Analysis	WBPhenotype:0000774	gametogenesis variant	81	120	1.5	8.8e-06	0.0001
wildtype 25°C vs wildtype 20°C	629 genes downregulated >2x (q=0.01)	Phenotype Enrichment Analysis	WBPhenotype:0001015	developmental growth variant	120	161	1.4	1e-05	0.00012
wildtype 25°C vs wildtype 20°C	629 genes downregulated >2x (q=0.01)	Phenotype Enrichment Analysis	WBPhenotype:0000033	developmental timing variant	130	176	1.3	7.3e-05	0.00079
wildtype 25°C vs wildtype 20°C	629 genes downregulated >2x (q=0.01)	Phenotype Enrichment Analysis	WBPhenotype:0001945	oocytes small	8	19	2.4	0.00014	0.0014
wildtype 25°C vs wildtype 20°C	629 genes downregulated >2x (q=0.01)	Phenotype Enrichment Analysis	WBPhenotype:0000032	sick	41	64	1.5	0.00025	0.0025
wildtype 25°C vs wildtype 20°C	629 genes downregulated >2x (q=0.01)	Phenotype Enrichment Analysis	WBPhenotype:0001982	cell membrane organization biogenesis variant	20	35	1.7	0.00058	0.0056
wildtype 25°C vs wildtype 20°C	629 genes downregulated >2x (q=0.01)	Phenotype Enrichment Analysis	WBPhenotype:0002041	molt variant	17	31	1.8	0.00066	0.0061
wildtype 25°C vs wildtype 20°C	629 genes downregulated >2x (q=0.01)	Phenotype Enrichment Analysis	WBPhenotype:0001029	patchy coloration	6.5	15	2.3	0.0007	0.0062
wildtype 25°C vs wildtype 20°C	629 genes downregulated >2x (q=0.01)	Phenotype Enrichment Analysis	WBPhenotype:0001925	oocytes disorganized	4.5	11	2.5	0.0015	0.013
wildtype 25°C vs wildtype 20°C	629 genes downregulated >2x (q=0.01)	Phenotype Enrichment Analysis	WBPhenotype:0000679	transgene subcellular localization variant	76	101	1.3	0.0016	0.013
wildtype 25°C vs wildtype 20°C	629 genes downregulated >2x (q=0.01)	Phenotype Enrichment Analysis	WBPhenotype:0000049	postembryonic development variant	140	173	1.2	0.0017	0.014
AFD-ablated 20°C vs wildtype 20°C	2001 genes upregulated >2x (q=0.01)	Phenotype Enrichment Analysis	WBPhenotype:0000603	muscle system morphology variant	27	59	2.2	1.9e-09	4.4e-07
AFD-ablated 20°C vs wildtype 20°C	2001 genes upregulated >2x (q=0.01)	Phenotype Enrichment Analysis	WBPhenotype:0001763	uptake by intestinal cell defective	4.6	18	4	3.3e-08	4e-06
AFD-ablated 20°C vs wildtype 20°C	2001 genes upregulated >2x (q=0.01)	Phenotype Enrichment Analysis	WBPhenotype:0001401	mitochondria morphology variant	22	49	2.2	4.8e-08	4e-06
AFD-ablated 20°C vs wildtype 20°C	2001 genes upregulated >2x (q=0.01)	Phenotype Enrichment Analysis	WBPhenotype:0000012	dauer constitutive	12	32	2.7	7.6e-08	4.6e-06
AFD-ablated 20°C vs wildtype 20°C	2001 genes upregulated >2x (q=0.01)	Phenotype Enrichment Analysis	WBPhenotype:0000644	paralyzed	16	39	2.4	1.1e-07	5.3e-06
AFD-ablated 20°C vs wildtype 20°C	2001 genes upregulated >2x (q=0.01)	Phenotype Enrichment Analysis	WBPhenotype:0001184	fat content increased	25	51	2.1	2.5e-07	1e-05
AFD-ablated 20°C vs wildtype 20°C	2001 genes upregulated >2x (q=0.01)	Phenotype Enrichment Analysis	WBPhenotype:0001645	protein degradation variant	17	36	2.1	4.6e-06	0.00016
AFD-ablated 20°C vs wildtype 20°C	2001 genes upregulated >2x (q=0.01)	Phenotype Enrichment Analysis	WBPhenotype:0001010	clear	22	43	2	7.3e-06	0.00022
AFD-ablated 20°C vs wildtype 20°C	2001 genes upregulated >2x (q=0.01)	Phenotype Enrichment Analysis	WBPhenotype:0000782	body wall muscle thick filament variant	14	31	2.2	8.2e-06	0.00022
AFD-ablated 20°C vs wildtype 20°C	2001 genes upregulated >2x (q=0.01)	Phenotype Enrichment Analysis	WBPhenotype:0000061	extended life span	65	98	1.5	2.7e-05	0.00064
AFD-ablated 20°C vs wildtype 20°C	2001 genes upregulated >2x (q=0.01)	Phenotype Enrichment Analysis	WBPhenotype:0000229	small	57	87	1.5	2.8e-05	0.00064
AFD-ablated 20°C vs wildtype 20°C	2001 genes upregulated >2x (q=0.01)	Phenotype Enrichment Analysis	WBPhenotype:0000646	sluggish	21	39	1.9	4.4e-05	0.00088
AFD-ablated 20°C vs wildtype 20°C	2001 genes upregulated >2x (q=0.01)	Phenotype Enrichment Analysis	WBPhenotype:0002056	eating variant	15	30	2	8.4e-05	0.0015
AFD-ablated 20°C vs wildtype 20°C	2001 genes upregulated >2x (q=0.01)	Phenotype Enrichment Analysis	WBPhenotype:0002059	pore forming toxin hypersensitive	12	25	2.1	8.8e-05	0.0015
AFD-ablated 20°C vs wildtype 20°C	1832 genes downregulated >2x (q=0.01)	Phenotype Enrichment Analysis	WBPhenotype:0000763	embryonic cell physiology variant	82	196	2.4	1.1e-36	2.7e-34
AFD-ablated 20°C vs wildtype 20°C	1832 genes downregulated >2x (q=0.01)	Phenotype Enrichment Analysis	WBPhenotype:0000770	embryonic cell morphology variant	34	102	3	7.1e-31	8.5e-29
AFD-ablated 20°C vs wildtype 20°C	1832 genes downregulated >2x (q=0.01)	Phenotype Enrichment Analysis	WBPhenotype:0001114	cell cycle defective early emb	19	67	3.6	1.8e-27	1.5e-25
AFD-ablated 20°C vs wildtype 20°C	1832 genes downregulated >2x (q=0.01)	Phenotype Enrichment Analysis	WBPhenotype:0001143	multiple nuclei early emb	21	72	3.4	2.5e-27	1.5e-25
AFD-ablated 20°C vs wildtype 20°C	1832 genes downregulated >2x (q=0.01)	Phenotype Enrichment Analysis	WBPhenotype:0001427	cytoplasmic appearance variant	27	83	3.1	1e-26	4.8e-25
AFD-ablated 20°C vs wildtype 20°C	1832 genes downregulated >2x (q=0.01)	Phenotype Enrichment Analysis	WBPhenotype:0001079	cytoplasmic dynamics defective early emb	13	52	4	3.2e-26	1.3e-24
AFD-ablated 20°C vs wildtype 20°C	1832 genes downregulated >2x (q=0.01)	Phenotype Enrichment Analysis	WBPhenotype:0000759	spindle defective early emb	47	119	2.5	6e-26	2.1e-24
AFD-ablated 20°C vs wildtype 20°C	1832 genes downregulated >2x (q=0.01)	Phenotype Enrichment Analysis	WBPhenotype:0002408	cytokinesis variant	58	137	2.4	1.3e-25	3.8e-24
AFD-ablated 20°C vs wildtype 20°C	1832 genes downregulated >2x (q=0.01)	Phenotype Enrichment Analysis	WBPhenotype:0002501	ectopic cleavage furrow early emb	11	45	4.3	4.4e-25	1.2e-23
AFD-ablated 20°C vs wildtype 20°C	1832 genes downregulated >2x (q=0.01)	Phenotype Enrichment Analysis	WBPhenotype:0002612	cytoplasmic streaming phenotype	15	57	3.7	5.9e-25	1.4e-23
AFD-ablated 20°C vs wildtype 20°C	1832 genes downregulated >2x (q=0.01)	Phenotype Enrichment Analysis	WBPhenotype:0000504	nuclear division variant	44	111	2.5	2.6e-24	5.7e-23
AFD-ablated 20°C vs wildtype 20°C	1832 genes downregulated >2x (q=0.01)	Phenotype Enrichment Analysis	WBPhenotype:0001588	microtubule organization biogenesis variant	55	130	2.3	3.3e-24	6.5e-23
AFD-ablated 20°C vs wildtype 20°C	1832 genes downregulated >2x (q=0.01)	Phenotype Enrichment Analysis	WBPhenotype:0000774	gametogenesis variant	260	402	1.6	1.7e-21	3.1e-20
AFD-ablated 20°C vs wildtype 20°C	1832 genes downregulated >2x (q=0.01)	Phenotype Enrichment Analysis	WBPhenotype:0001499	meiotic chromosome segregation variant	41	98	2.4	6.9e-20	1.2e-18
AFD-ablated 20°C vs wildtype 20°C	1832 genes downregulated >2x (q=0.01)	Phenotype Enrichment Analysis	WBPhenotype:0001026	nuclear morphology variation early emb	12	44	3.6	2.4e-19	3.8e-18
AFD-ablated 20°C vs wildtype 20°C	1832 genes downregulated >2x (q=0.01)	Phenotype Enrichment Analysis	WBPhenotype:0001882	aneuploidy	37	88	2.4	7.5e-18	1.1e-16
AFD-ablated 20°C vs wildtype 20°C	1832 genes downregulated >2x (q=0.01)	Phenotype Enrichment Analysis	WBPhenotype:0000069	progeny variant	160	259	1.6	1.1e-17	1.5e-16
AFD-ablated 20°C vs wildtype 20°C	1832 genes downregulated >2x (q=0.01)	Phenotype Enrichment Analysis	WBPhenotype:0001374	pronuclear nuclear appearance variant emb	35	83	2.4	5.1e-17	6.8e-16
AFD-ablated 20°C vs wildtype 20°C	1832 genes downregulated >2x (q=0.01)	Phenotype Enrichment Analysis	WBPhenotype:0001116	absolute cell cycle timing defective early emb	9.8	35	3.6	1.4e-15	1.8e-14
AFD-ablated 20°C vs wildtype 20°C	1832 genes downregulated >2x (q=0.01)	Phenotype Enrichment Analysis	WBPhenotype:0000762	spindle position defective early emb	12	40	3.3	1.8e-15	2.1e-14
AFD-ablated 20°C vs wildtype 20°C	1832 genes downregulated >2x (q=0.01)	Phenotype Enrichment Analysis	WBPhenotype:0000697	protruding vulva	160	244	1.5	2.8e-13	3.2e-12
AFD-ablated 20°C vs wildtype 20°C	1832 genes downregulated >2x (q=0.01)	Phenotype Enrichment Analysis	WBPhenotype:0001335	hermaphrodite reproductive system morphology variant	180	264	1.5	1.6e-12	1.7e-11
AFD-ablated 20°C vs wildtype 20°C	1832 genes downregulated >2x (q=0.01)	Phenotype Enrichment Analysis	WBPhenotype:0001681	spindle orientation variant	20	50	2.5	5.3e-12	5.5e-11
AFD-ablated 20°C vs wildtype 20°C	1832 genes downregulated >2x (q=0.01)	Phenotype Enrichment Analysis	WBPhenotype:0001082	large cytoplasmic granules early emb	10	31	3.1	1.8e-11	1.8e-10
AFD-ablated 20°C vs wildtype 20°C	1832 genes downregulated >2x (q=0.01)	Phenotype Enrichment Analysis	WBPhenotype:0000749	embryonic development variant	700	857	1.2	3e-11	2.9e-10
AFD-ablated 20°C vs wildtype 20°C	1832 genes downregulated >2x (q=0.01)	Phenotype Enrichment Analysis	WBPhenotype:0001408	pattern protein expression variant	64	113	1.8	1.1e-10	1e-09
AFD-ablated 20°C vs wildtype 20°C	1832 genes downregulated >2x (q=0.01)	Phenotype Enrichment Analysis	WBPhenotype:0000040	one cell arrest early emb	12	32	2.8	6.7e-10	5.9e-09
AFD-ablated 20°C vs wildtype 20°C	1832 genes downregulated >2x (q=0.01)	Phenotype Enrichment Analysis	WBPhenotype:0001403	antibody subcellular localization variant	13	34	2.6	2.4e-09	2.1e-08
AFD-ablated 20°C vs wildtype 20°C	1832 genes downregulated >2x (q=0.01)	Phenotype Enrichment Analysis	WBPhenotype:0000218	vulval cell induction increased	46	82	1.8	8.6e-09	7.1e-08
AFD-ablated 20°C vs wildtype 20°C	1832 genes downregulated >2x (q=0.01)	Phenotype Enrichment Analysis	WBPhenotype:0000777	polar body extrusion defective early emb	9.8	27	2.8	1.3e-08	1e-07
AFD-ablated 20°C vs wildtype 20°C	1832 genes downregulated >2x (q=0.01)	Phenotype Enrichment Analysis	WBPhenotype:0001276	ectopic expression transgene	28	55	1.9	8.2e-08	6.3e-07
AFD-ablated 20°C vs wildtype 20°C	1832 genes downregulated >2x (q=0.01)	Phenotype Enrichment Analysis	WBPhenotype:0000220	vulva cell fate specification variant	59	97	1.6	8.8e-08	6.6e-07
AFD-ablated 20°C vs wildtype 20°C	1832 genes downregulated >2x (q=0.01)	Phenotype Enrichment Analysis	WBPhenotype:0001378	mitotic chromosome segregation variant	13	31	2.4	1.2e-07	8.3e-07
AFD-ablated 20°C vs wildtype 20°C	1832 genes downregulated >2x (q=0.01)	Phenotype Enrichment Analysis	WBPhenotype:0001301	P granule abnormal	11	28	2.5	1.2e-07	8.3e-07
AFD-ablated 20°C vs wildtype 20°C	1832 genes downregulated >2x (q=0.01)	Phenotype Enrichment Analysis	WBPhenotype:0001041	meiosis defective early emb	16	36	2.2	2.8e-07	1.9e-06
AFD-ablated 20°C vs wildtype 20°C	1832 genes downregulated >2x (q=0.01)	Phenotype Enrichment Analysis	WBPhenotype:0000425	antibody staining reduced	18	39	2.1	2.9e-07	1.9e-06
AFD-ablated 20°C vs wildtype 20°C	1832 genes downregulated >2x (q=0.01)	Phenotype Enrichment Analysis	WBPhenotype:0001020	embryonic lethal late emb	15	33	2.3	3.6e-07	2.3e-06
AFD-ablated 20°C vs wildtype 20°C	1832 genes downregulated >2x (q=0.01)	Phenotype Enrichment Analysis	WBPhenotype:0000038	exploded through vulva	81	120	1.5	1.2e-06	7.7e-06
AFD-ablated 20°C vs wildtype 20°C	1832 genes downregulated >2x (q=0.01)	Phenotype Enrichment Analysis	WBPhenotype:0001208	RNAi resistant	28	51	1.9	1.2e-06	7.7e-06
AFD-ablated 20°C vs wildtype 20°C	1832 genes downregulated >2x (q=0.01)	Phenotype Enrichment Analysis	WBPhenotype:0001595	somatic transgene silencing variant	20	40	2	1.7e-06	1e-05
AFD-ablated 20°C vs wildtype 20°C	1832 genes downregulated >2x (q=0.01)	Phenotype Enrichment Analysis	WBPhenotype:0001036	sterile F1	14	30	2.2	2.2e-06	1.3e-05
AFD-ablated 20°C vs wildtype 20°C	1832 genes downregulated >2x (q=0.01)	Phenotype Enrichment Analysis	WBPhenotype:0001752	vesicle trafficking variant	160	207	1.3	3.6e-06	2.1e-05
AFD-ablated 20°C vs wildtype 20°C	1832 genes downregulated >2x (q=0.01)	Phenotype Enrichment Analysis	WBPhenotype:0000889	sexually dimorphic physiology variant	150	198	1.3	4.2e-06	2.3e-05
AFD-ablated 20°C vs wildtype 20°C	1832 genes downregulated >2x (q=0.01)	Phenotype Enrichment Analysis	WBPhenotype:0000772	sister chromatid segregation defective early emb	18	35	2	6.2e-06	3.4e-05
AFD-ablated 20°C vs wildtype 20°C	1832 genes downregulated >2x (q=0.01)	Phenotype Enrichment Analysis	WBPhenotype:0000691	gonad development variant	99	138	1.4	1.3e-05	6.9e-05
AFD-ablated 20°C vs wildtype 20°C	1832 genes downregulated >2x (q=0.01)	Phenotype Enrichment Analysis	WBPhenotype:0000351	failure to hatch	12	25	2.1	2.2e-05	0.00012
AFD-ablated 20°C vs wildtype 20°C	1832 genes downregulated >2x (q=0.01)	Phenotype Enrichment Analysis	WBPhenotype:0000701	epithelial development variant	17	33	1.9	3.5e-05	0.00018
AFD-ablated 20°C vs wildtype 20°C	1832 genes downregulated >2x (q=0.01)	Phenotype Enrichment Analysis	WBPhenotype:0002075	eggshell formation variant	30	50	1.7	5.8e-05	0.00029
AFD-ablated 20°C vs wildtype 20°C	1832 genes downregulated >2x (q=0.01)	Phenotype Enrichment Analysis	WBPhenotype:0000111	pattern of gene expression variant	370	435	1.2	6.3e-05	0.00031
AFD-ablated 20°C vs wildtype 20°C	1832 genes downregulated >2x (q=0.01)	Phenotype Enrichment Analysis	WBPhenotype:0000172	cell proliferation increased	20	36	1.8	7.6e-05	0.00036
AFD-ablated 20°C vs wildtype 20°C	1832 genes downregulated >2x (q=0.01)	Phenotype Enrichment Analysis	WBPhenotype:0001038	tumorous germline	17	32	1.8	8.9e-05	0.00042
AFD-ablated 20°C vs wildtype 20°C	1832 genes downregulated >2x (q=0.01)	Phenotype Enrichment Analysis	WBPhenotype:0000673	brood size variant	250	308	1.2	0.0001	0.00048
AFD-ablated 20°C vs wildtype 20°C	1832 genes downregulated >2x (q=0.01)	Phenotype Enrichment Analysis	WBPhenotype:0002369	sister cell division timing asynchrony reduced	15	29	1.9	0.00011	0.0005
AFD-ablated 20°C vs wildtype 20°C	1832 genes downregulated >2x (q=0.01)	Phenotype Enrichment Analysis	WBPhenotype:0000228	spontaneous mutation rate increased	18	31	1.8	0.00028	0.0012
AFD-ablated 20°C vs wildtype 20°C	1832 genes downregulated >2x (q=0.01)	Phenotype Enrichment Analysis	WBPhenotype:0001022	hermaphrodite sexual development variant	14	26	1.8	0.0003	0.0013
AFD-ablated 20°C vs wildtype 20°C	1832 genes downregulated >2x (q=0.01)	Phenotype Enrichment Analysis	WBPhenotype:0001180	accumulated germline cell corpses	48	69	1.4	0.00037	0.0016
AFD-ablated 20°C vs wildtype 20°C	1832 genes downregulated >2x (q=0.01)	Phenotype Enrichment Analysis	WBPhenotype:0000683	masculinization of germline	10	20	2	0.00043	0.0018
AFD-ablated 20°C vs wildtype 20°C	1832 genes downregulated >2x (q=0.01)	Phenotype Enrichment Analysis	WBPhenotype:0000729	cell death variant	160	198	1.2	0.00048	0.002
AFD-ablated 20°C vs wildtype 20°C	1832 genes downregulated >2x (q=0.01)	Phenotype Enrichment Analysis	WBPhenotype:0000274	dead eggs laid	18	30	1.7	0.00079	0.0032
AFD-ablated 20°C vs wildtype 20°C	1832 genes downregulated >2x (q=0.01)	Phenotype Enrichment Analysis	WBPhenotype:0001977	germ cell partition morphology variant	16	28	1.7	0.0009	0.0036
AFD-ablated 20°C vs wildtype 20°C	1832 genes downregulated >2x (q=0.01)	Phenotype Enrichment Analysis	WBPhenotype:0002188	male somatic gonad development variant	26	40	1.6	0.00092	0.0036
AFD-ablated 20°C vs wildtype 20°C	1832 genes downregulated >2x (q=0.01)	Phenotype Enrichment Analysis	WBPhenotype:0001925	oocytes disorganized	14	25	1.8	0.00096	0.0037
AFD-ablated 20°C vs wildtype 20°C	1832 genes downregulated >2x (q=0.01)	Phenotype Enrichment Analysis	WBPhenotype:0001384	fertility reduced	710	777	1.1	0.0013	0.005
AFD-ablated 20°C vs wildtype 20°C	1832 genes downregulated >2x (q=0.01)	Phenotype Enrichment Analysis	WBPhenotype:0001235	cell division polarity variant	15	24	1.6	0.0034	0.013
AFD-ablated 20°C vs wildtype 20°C	1832 genes downregulated >2x (q=0.01)	Phenotype Enrichment Analysis	WBPhenotype:0001361	chromosome condensation variant	42	58	1.4	0.0039	0.014
AFD-ablated 20°C vs wildtype 20°C	1832 genes downregulated >2x (q=0.01)	Phenotype Enrichment Analysis	WBPhenotype:0001897	light response variant	17	27	1.6	0.0042	0.015
AFD-ablated 20°C vs wildtype 20°C	1832 genes downregulated >2x (q=0.01)	Phenotype Enrichment Analysis	WBPhenotype:0000365	embryo osmotic integrity defective early emb	26	38	1.5	0.005	0.018
