# Supplementary material for: Neuronal temperature perception induces specific defenses that enable C. elegans to cope with the enhanced reactivity of hydrogen peroxide at high temperature
Source: eLife. 2022 Oct 13;11:e78941. doi: 10.7554/eLife.78941 (PMC9635881; doi:10.7554/eLife.78941)
Supplement: Supplementary file 5. [file elife-78941-supp5.xlsx]

## Sheet: Supplementary file 5
Supplementary file 5. Statistical analysis for Figures 5 and Figure 5—figure supplements 1.
		Temperature
Set	Genotype	egg → day 2 adult	survival assay	Mean survival ± SEM (days)	Mean survival in each petri plate				Median survival (days)	75th percentile (days)	N dead / initial N	Group	% Mean survival change vs. group a	P value (log-rank) vs. group a	P value (log-rank) vs. group b	P value (log-rank) vs. group c	Figure
Survival in 6 mM tBuOOH, E. coli OP50
	wild type	20°C	20°C	1.86 ± 0.02	1.91732	1.77077	1.9417	1.81138	1.88	2.03	130 / 130	a					5F
	ins-39(tm6467) X	20°C	20°C	2.34 ± 0.04	2.26679	2.39224	2.38303	2.32748	2.38	2.52	94 / 94	b	0.26	< 0.0001
	ins-39(tm6467) X; witEx9[Pgcy-8::ins-39 + Punc-122::GFP]	20°C	20°C	1.33 ± 0.03	1.35649	1.20388	1.28312	1.34338	1.3	1.49	130 / 153	c	-0.28	< 0.0001	< 0.0001
	ins-39(tm6467) X; witEx10[Pgcy-8::ins-39 + Punc-122::GFP]	20°C	20°C	1.30 ± 0.05	1.2806	1.41567	1.26051	1.22562	1.31	1.57	56 / 59	d	-0.3	< 0.0001	< 0.0001	> 0.05
	wild type	20°C	20°C	1.94 ± 0.03	1.86397	1.98312	1.84941	2.00002	1.94444	2.11	102 / 102	a					5G
	ins-39(tm6467) X	20°C	20°C	2.51 ± 0.05	2.18411	2.76686	2.59091	2.2662	2.51114	2.86	133 / 158	b	0.29	< 0.0001
	wild type	25°C	20°C	3.29 ± 0.08	3.18012	3.09405	3.45478	3.39711	3.29331	3.89	129 / 129	c	0.69	< 0.0001	< 0.0001
	ins-39(tm6467) X	25°C	20°C	3.44 ± 0.08	3.24591	3.24383	4.18428	3.28966	3.43929	4.05	124 / 124	d	0.77	< 0.0001	< 0.0001	> 0.05
	AFD ablated	20°C	20°C	4.86 ± 0.11	4.94012	4.45806	5.34388	4.76794	4.81	5.62	133 / 133	a					5S1B
	AFD ablated; tph-1(n4622) II	20°C	20°C	4.69 ± 0.14	5.38987	4.16447	5.07209	4.12027	4.62	5.62	133 / 133	b	-0.04	> 0.05
