# Supplementary material for: Neuronal temperature perception induces specific defenses that enable C. elegans to cope with the enhanced reactivity of hydrogen peroxide at high temperature
Source: eLife. 2022 Oct 13;11:e78941. doi: 10.7554/eLife.78941 (PMC9635881; doi:10.7554/eLife.78941)
Supplement: Supplementary file 6. [file elife-78941-supp6.xlsx]

## Sheet: Supplementary file 6
Supplementary file 6. Regulation of DAF-16 target genes among genes up- and down-regulated significantly (q value < 0.01) by growth at 25°C and by AFD ablation at 20°C.
		DAF-16 targets (Kumar et al., 2015)		Not DAF-16 targets (Kumar et al., 2015)
gene expression effect [wild type 25°C / wild type 20°C]	gene expression effect [AFD(-) 20°C / wild type 20°C]	genes (% total)	P value (cell chi-square test)	genes (% total)	P value (cell chi-square test)
up at 25°C	up in AFD(-)	8 (3.0%)	< 0.0001	257 (97.0%)	> 0.05
up at 25°C	no effect	2 (1.4%)	0.037	137 (98.6%)	> 0.05
up at 25°C	down in AFD(-)	0 (0.0%)	> 0.05	10 (100.0%)	> 0.05
no effect	up in AFD(-)	11 (0.7%)	0.016	1464 (99.3%)	> 0.05
no effect	no effect	6 (0.2%)	> 0.05	2539 (99.8%)	> 0.05
no effect	down in AFD(-)	1 (0.1%)	> 0.05	1194 (99.9%)	> 0.05
down at 25°C	up in AFD(-)	0 (0.0%)	> 0.05	475 (100.0%)	> 0.05
down at 25°C	no effect	1 (0.1%)	> 0.05	925 (99.9%)	> 0.05
down at 25°C	down in AFD(-)	0 (0.0%)	> 0.05	872 (100.0%)	> 0.05
