# Supplementary material for: Neuronal temperature perception induces specific defenses that enable C. elegans to cope with the enhanced reactivity of hydrogen peroxide at high temperature
Source: eLife. 2022 Oct 13;11:e78941. doi: 10.7554/eLife.78941 (PMC9635881; doi:10.7554/eLife.78941)
Supplement: Supplementary file 7. [file elife-78941-supp7.xlsx]

## Sheet: Supplementary file 7
Supplementary file 7. Statistical analysis for Figure 6 and Figure 6—figure supplement 1.
		Temperature
Set	Genotype	egg → day 2 adult	survival assay	Mean survival ± SEM (days)	Mean survival in each petri plate				Median survival (days)	75th percentile (days)	N dead / initial N	Group	% Mean survival change vs. group a	P value (log-rank) vs. group a	P value (log-rank) vs. group b	P value (log-rank) vs. group c	Figure
Survival in 6 mM tBuOOH, E. coli OP50
	wild type	20°C	20°C	1.94 ± 0.04	2.03238	1.81602	2.10819	1.82931	1.82	2.21	150 / 152	a					6C
	daf-16(mu86) I	20°C	20°C	1.54 ± 0.04	1.49631	1.53444	1.57418		1.55	1.69	84 / 87	b	-0.21	< 0.0001
	wild type	25°C	20°C	3.04 ± 0.07	3.15584	3.02636	3.19317	2.79997	2.95	3.54	140 / 149	c	0.57	< 0.0001	< 0.0001
	daf-16(mu86) I	25°C	20°C	1.97 ± 0.04	2.09423	2.08146	1.91501	1.78955	1.95	2.31	136 / 150	d	0.02	> 0.05	< 0.0001	< 0.0001
	wild type	20°C	20°C	2.14 ± 0.04	2.12901	2.07466	2.23458		2.08	2.42	110 / 110	a					6D
	AFD ablated	20°C	20°C	5.52 ± 0.11	5.32228	5.65581	5.58748		5.51	6.51	127 / 138	b	1.58	< 0.0001
	daf-16(mu86) I	20°C	20°C	1.76 ± 0.04	1.84387	1.70295	1.71277	1.6497	1.75	2.03	156 / 192	c	-0.18	< 0.0001	< 0.0001
	AFD ablated; daf-16(mu86) I	20°C	20°C	2.30 ± 0.09	2.33793	2.40135	2.37543	2.02195	2.34	2.75	68 / 68	d	0.07	0.033	< 0.0001	< 0.0001
	AFD ablated; daf-16(mu86) I	20°C	20°C	2.24 ± 0.04	4.02185	3.81962	4.25667	3.50857	2.25	2.55	161 / 176	a					6E
	AFD ablated; daf-16(mu86) I; qyIs292[Pges-1::GFP::daf-16]	20°C	20°C	3.24 ± 0.14	3.30072	2.87563	3.56412		3.52	4.1	52 / 70	b	0.44	< 0.0001
	AFD ablated	20°C	20°C	3.93 ± 0.08	4.02185	3.81962	4.25667	3.50857	3.98	4.57	108 / 123	c	0.75	< 0.0001	0.0003
	daf-16(mu86) I	20°C	20°C	1.77 ± 0.03	1.77453	1.60844	1.77929	1.8685	1.75	2	142 / 155	a					6F
	daf-16(mu86) I; qyIs292[Pges-1::GFP::daf-16]	20°C	20°C	2.03 ± 0.05	2.18071	1.86224	2.06028		2.05	2.36	101 / 116	b	0.15	< 0.0001
	daf-16(mu86) I	25°C	20°C	1.99 ± 0.04	2.12543	1.97372	2.00303	1.83543	1.94	2.29	155 / 155	c	0.12	< 0.0001	> 0.05
	daf-16(mu86) I; qyIs292[Pges-1::GFP::daf-16]	25°C	20°C	2.77 ± 0.06	2.7506	2.65278	2.87434	2.80525	2.7	3.27	136 / 136	d	0.57	< 0.0001	< 0.0001	< 0.0001
	AFD ablated	20°C	20°C	5.15 ± 0.23	5.83431	4.66615	4.90558	5.18847	5.09	6.32	65 / 65	a					6S1C
	AFD ablated; daf-3(mgDf90) X	20°C	20°C	5.45 ± 0.23	6.43616	5.51734	5.35812	5.03601	5.54	6.68	66 / 66	b	0.06	> 0.05
