# Supplementary material for: Neuronal temperature perception induces specific defenses that enable C. elegans to cope with the enhanced reactivity of hydrogen peroxide at high temperature
Source: eLife. 2022 Oct 13;11:e78941. doi: 10.7554/eLife.78941 (PMC9635881; doi:10.7554/eLife.78941)
Supplement: Supplementary file 8. [file elife-78941-supp8.xlsx]

## Sheet: Supplementary file 8
Supplementary file 8. Statistical analysis for Figure 7.
		Temperature
Set	Genotype	egg → day 2 adult	survival assay	Mean survival ± SEM (days)	Mean survival in each petri plate				Median survival (days)	75th percentile (days)	N dead / initial N	Group	% Mean survival change vs. group a	P value (log-rank) vs. group a	P value (log-rank) vs. group b	P value (log-rank) vs. group c	Figure
Survival in 6 mM tBuOOH, E. coli OP50
	wild type + empty vector	20°C	20°C	2.77 ± 0.05	2.97751	2.70176	2.66919	2.6946	2.72	2.98	129 / 141	a					7B
	AFD ablation + empty vector	20°C	20°C	6.70 ± 0.19	6.91449	6.61125	6.80871	6.44091	6.46	8.12	109 / 115	b	1.42	< 0.0001
	wild type + skn-1(RNAi)	20°C	20°C	2.02 ± 0.06	2.97751	2.70176	2.66919	2.6946	1.95	2.27	132 / 132	c	-0.27	< 0.0001	< 0.0001
	AFD ablation + skn-1(RNAi)	20°C	20°C	2.80 ± 0.10	2.62711	3.07485	2.66376	2.73688	2.78	3.24	77 / 77	d	0.01	> 0.05	< 0.0001	< 0.0001
	daf-16(mu86) I + empty vector	20°C	20°C	1.44 ± 0.04	1.44677	1.2149	1.45835	1.6141	1.35	1.61	142 / 161	a					7C
	AFD ablation; daf-16(mu86) I + empty vector	20°C	20°C	2.92 ± 0.06	3.18934	3.06794	2.68064	2.70596	3.06	3.31	151 / 166	b	1.03	< 0.0001
	daf-16(mu86) I + skn-1(RNAi)	20°C	20°C	0.67 ± 0.03	0.63929	0.74767	0.66718	0.61712	0.64	0.74	69 / 77	c	-0.54	< 0.0001	< 0.0001
	AFD ablation; daf-16(mu86) I + skn-1(RNAi)	20°C	20°C	1.04 ± 0.02	0.99523	1.03673	1.06054	1.07704	1.02	1.15	155 / 172	d	-0.28	< 0.0001	< 0.0001	< 0.0001
