# Supplementary material for: Neuronal temperature perception induces specific defenses that enable C. elegans to cope with the enhanced reactivity of hydrogen peroxide at high temperature
Source: eLife. 2022 Oct 13;11:e78941. doi: 10.7554/eLife.78941 (PMC9635881; doi:10.7554/eLife.78941)
Supplement: Supplementary file 9. [file elife-78941-supp9.xlsx]

## Sheet: Supplementary file 9
Supplementary file 9. Bacterial strains.
Strain	Genotype	Source	Reference
OP50	E. coli B, uracil auxotroph	CGC	Brenner, 1974
HT115	E. coli F- mcrA, mcrB, IN(rrnD-rrnE)1, rnc14::Tn10(DE3 lysogen: lavUV5 promoter -T7 polymerase). Tetracycline resistant	CGC	Kamath et al., 2001
JI377	E. coli K12 F- ahpCF katG katE	James Imlay	Seaver and Imlay, 2001
E007	Enterococcus faecium wild type	Danielle Garsin	Chavez et al, 2007
