# Supplementary material for: Neuronal temperature perception induces specific defenses that enable C. elegans to cope with the enhanced reactivity of hydrogen peroxide at high temperature
Source: eLife. 2022 Oct 13;11:e78941. doi: 10.7554/eLife.78941 (PMC9635881; doi:10.7554/eLife.78941)
Supplement: Supplementary file 10. [file elife-78941-supp10.xlsx]

## Sheet: Supplementary file 10
Supplementary file 10. Nematode strains.
Strain	Species	Genotype	Source	Reference
QZ0	Caenorhabditis elegans	N2 wild type	Joy Alcedo	Schiffer et. al, 2020
PR678	Caenorhabditis elegans	tax-4(p678) III	CGC
SAY141	Caenorhabditis elegans	pgIs2[gcy-8p::TU#813 + gcy-8p::TU#814 + unc-122p::GFP + gcy-8p::mCherry + gcy-8p::GFP + ttx-3p::GFP] 6x outcrossed	CGC	Glauser et al., 2011; Schiffer et. al, 2020
PY9248	Caenorhabditis elegans	gcy-23(oy150) gcy-8(oy44) gcy-18(nj38) IV	Piali Sengupta	Takeishi et al., 2016
IK800	Caenorhabditis elegans	gcy-8(oy44) IV	CGC
IK429	Caenorhabditis elegans	gcy-18(nj38) IV	CGC
PY9250	Caenorhabditis elegans	gcy-23(oy150) IV	Piali Sengupta	Takeishi et al., 2016
SAY182	Caenorhabditis elegans	tph-1(n4622) II; pgIs2[gcy-8p::TU#813 + gcy-8p::TU#814 + unc-122p::GFP + gcy-8p::mCherry + gcy-8p::GFP + ttx-3p::GFP]	This work
PY12304	Caenorhabditis elegans	ins-39(oy167[ins-39::SL2::GFP]) X	This work
PY12305	Caenorhabditis elegans	tax-4(p678) III; ins-39(oy167[ins-39::SL2::GFP]) X	This work
ZC2751	Caenorhabditis elegans	ins-39(tm6467) X	Yun Zhang	Wu et. al, 2019
SAY357	Caenorhabditis elegans	ins-39(tm6467) X; witEx9[gcy-8p::ins-39(+); unc-122p::GFP]	This work
SAY358	Caenorhabditis elegans	ins-39(tm6467) X; witEx10[gcy-8p::ins-39(+); unc-122p::GFP]	This work
QZ60	Caenorhabditis elegans	daf-16(mu86) I	This work
SAY144	Caenorhabditis elegans	daf-16(mu86); pgIs2[gcy-8p::TU#813 + gcy-8p::TU#814 + unc-122p::GFP + gcy-8p::mCherry + gcy-8p::GFP + ttx-3p::GFP]	This work
SAY203	Caenorhabditis elegans	daf-16(mu86) I; pgIs2[gcy-8p::TU#813 + gcy-8p::TU#814 + unc-122p::GFP + gcy-8p::mCherry + gcy-8p::GFP + ttx-3p::GFP]; qyIs292[Pges-1::GFP::daf-16]	This work
NK1232	Caenorhabditis elegans	daf-16(mu86); qyIs292[Pges-1::GFP::daf-16]	Ryan Baugh	Kaplan et al., 2015
SAY190	Caenorhabditis elegans	pgIs2[gcy-8p::TU#813 + gcy-8p::TU#814 + unc-122p::GFP + gcy-8p::mCherry + gcy-8p::GFP + ttx-3p::GFP]; daf-3(mgDf90)	This work
