# Supplementary material for: Neuronal temperature perception induces specific defenses that enable C. elegans to cope with the enhanced reactivity of hydrogen peroxide at high temperature
Source: eLife. 2022 Oct 13;11:e78941. doi: 10.7554/eLife.78941 (PMC9635881; doi:10.7554/eLife.78941)
Supplement: Supplementary file 11. [file elife-78941-supp11.xlsx]

## Sheet: Supplementary file 11
Supplementary file 11. PCR genotyping primers and phenotypes used for strain construction.
Allele	Phenotype	Primers
tax-4(p678)	sequencing	GAGACGATCATCCACTTGGTAAG
		AAATCTTCCGGATCCAACTCTAC
pgIs2[gcy-8p::TU#813 + gcy-8p::TU#814 + unc-122p::GFP + gcy-8p::mCherry + gcy-8p::GFP + ttx-3p::GFP]	fluorescent marker	-
tph-1(n4622)	-	AGATTGTGTGGCAGGCGGC
		TGATGTCTGAGCGGAGAGAGTT
ins-39(oy167[ins-39::SL2::GFP]	fluorescent marker	-
daf-16(mu86)	-	AGAACACCATGGGGGCACTGGAT
		GGCGGGAATGAAGCAAGAGCCAA
		TGACGCTCACCTTGAAAAGGTCAAT
		GGAACCGATTCGCCAACCCATGA
qyIs292[Pges-1::GFP::daf-16]	fluorescent marker	-
daf-3(mgDf90)	-	AAACGCGTCATGTGGACCAC
		ACCCTCATGCCTACTGTCAG
