# Supplementary figures and images for: Neuronal temperature perception induces specific defenses that enable C. elegans to cope with the enhanced reactivity of hydrogen peroxide at high temperature
Source: eLife journal article supplement (doi:10.7554/elife.78941), 2022-10-13

Figure 8—figure supplement 2

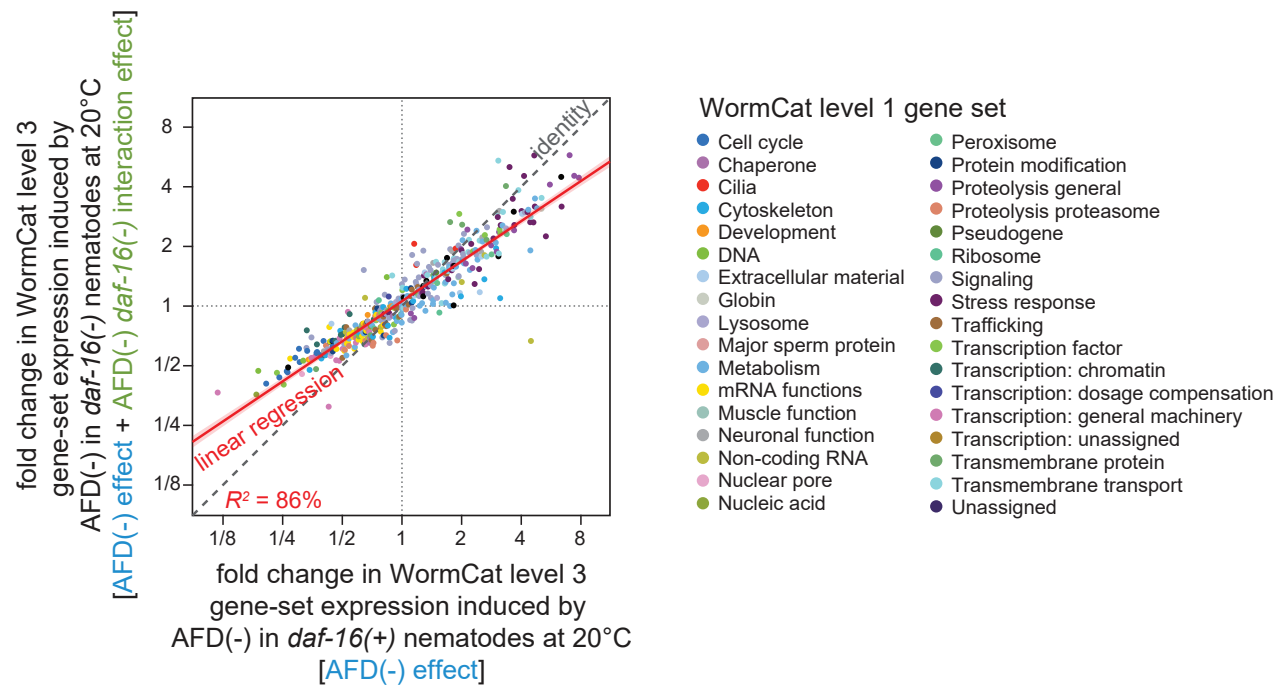

Supplement: supp [file elife-78941-supp-v1.zip]

Figure 4—figure supplement 4

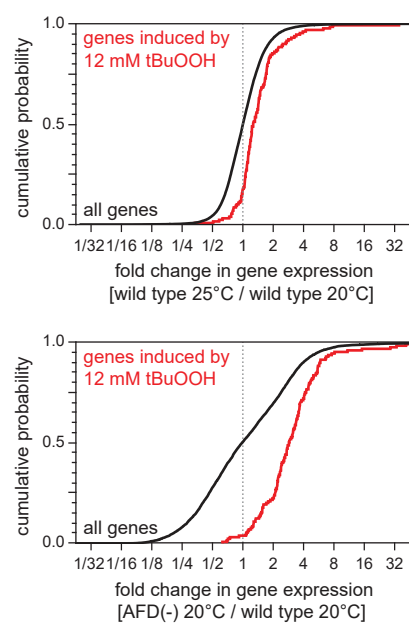

Supplement: supp [file elife-78941-supp-v1.zip]

Figure 6—figure supplement 1

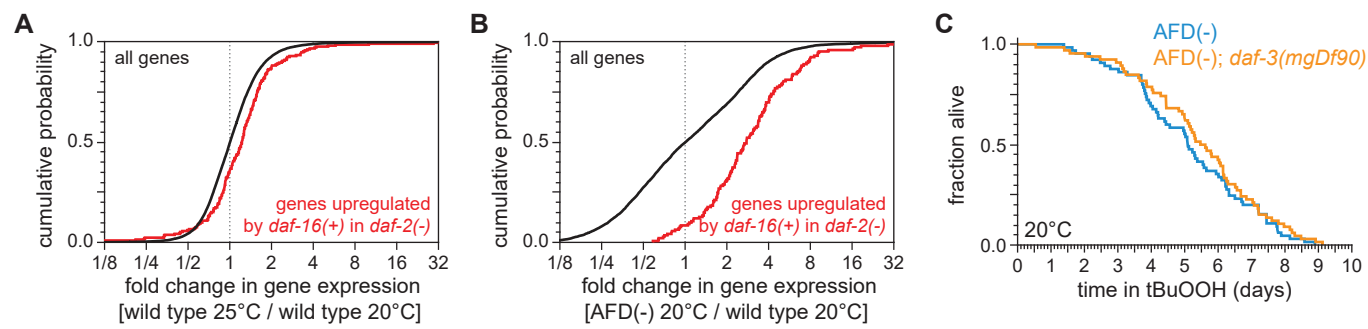

Supplement: supp [file elife-78941-supp-v1.zip]

Figure 3—figure supplement 1

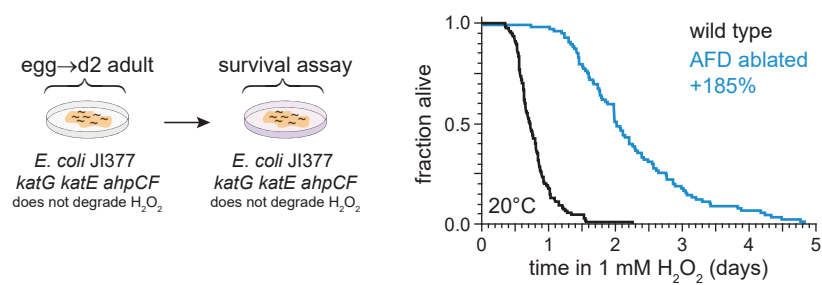

Supplement: supp [file elife-78941-supp-v1.zip]

Figure 5—figure supplement 1

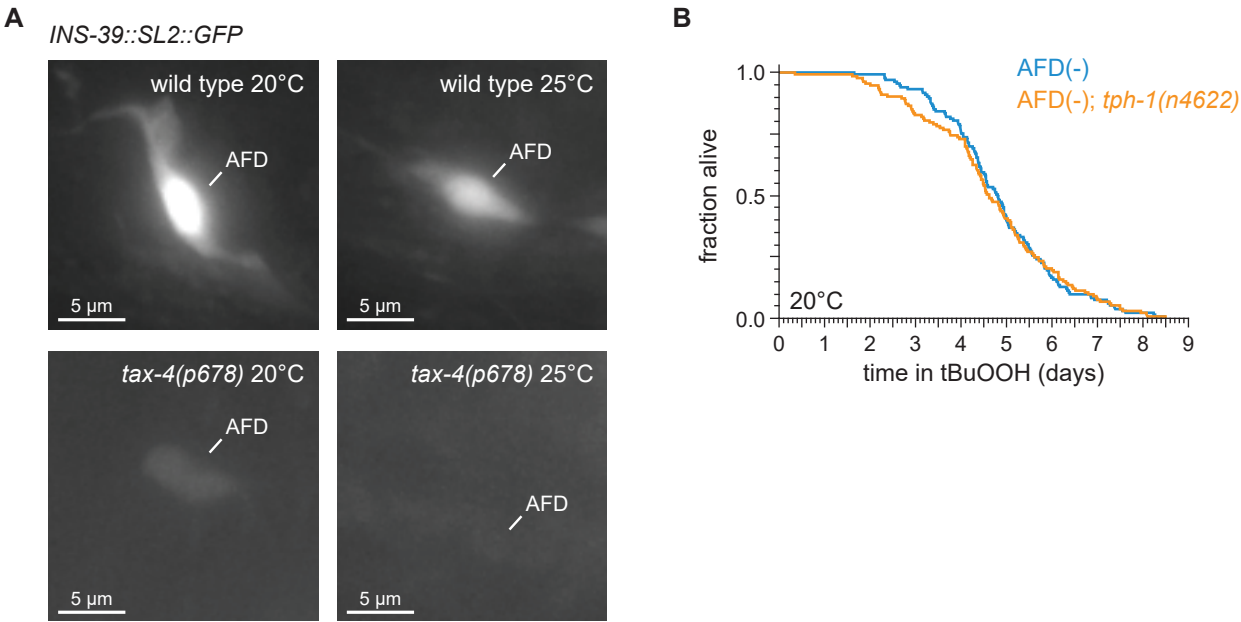

Supplement: supp [file elife-78941-supp-v1.zip]

Figure 7—figure supplement 1

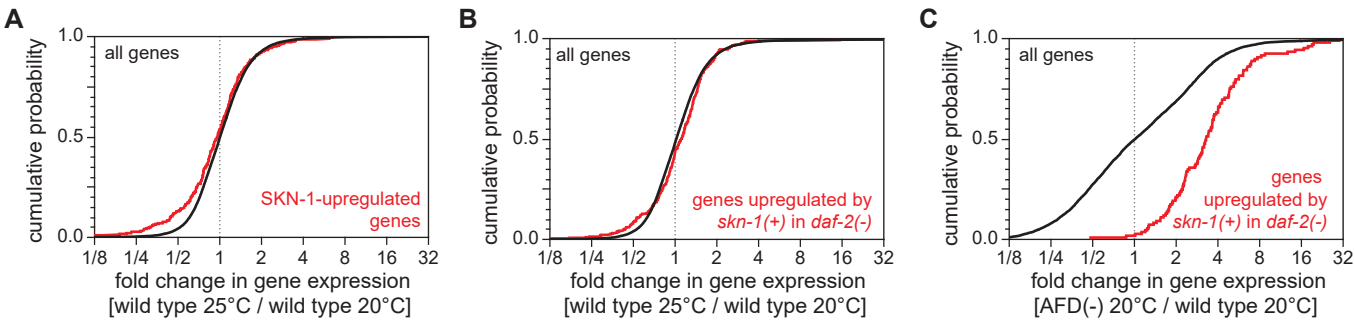

Supplement: supp [file elife-78941-supp-v1.zip]

Figure 8—figure supplement 1

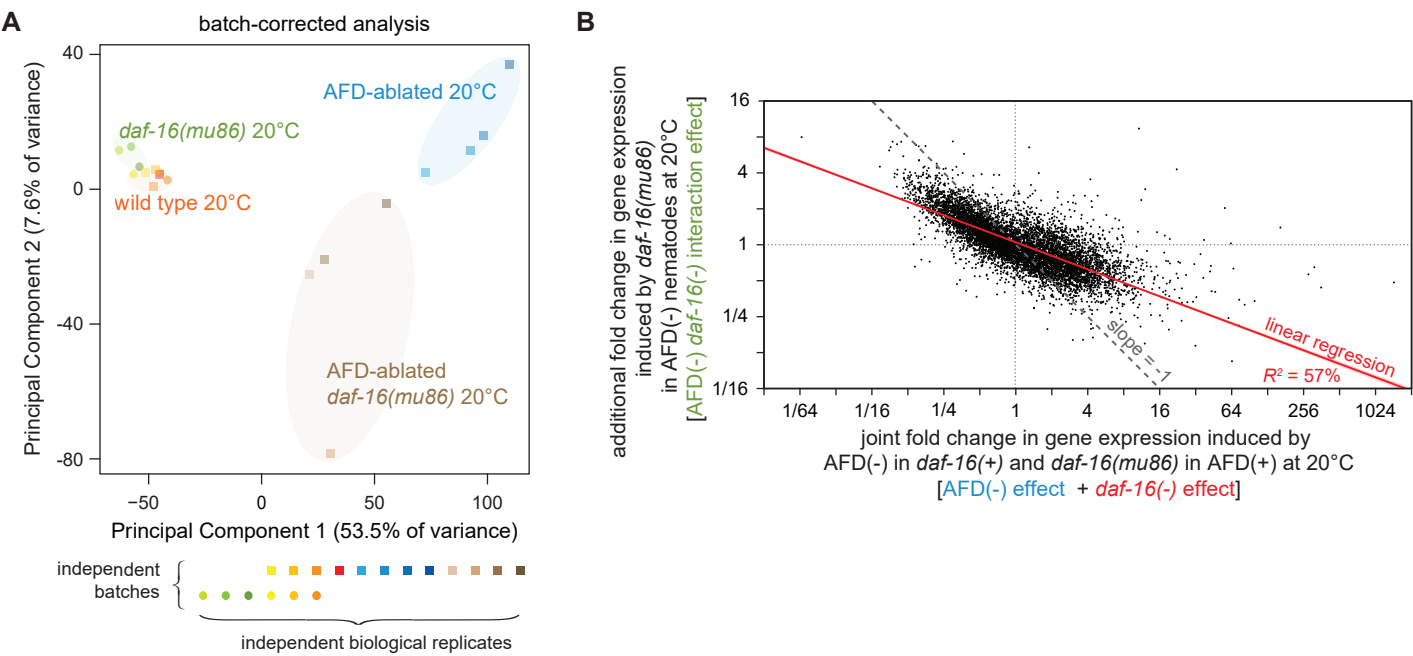

Supplement: supp [file elife-78941-supp-v1.zip]

Figure 4—figure supplement 2

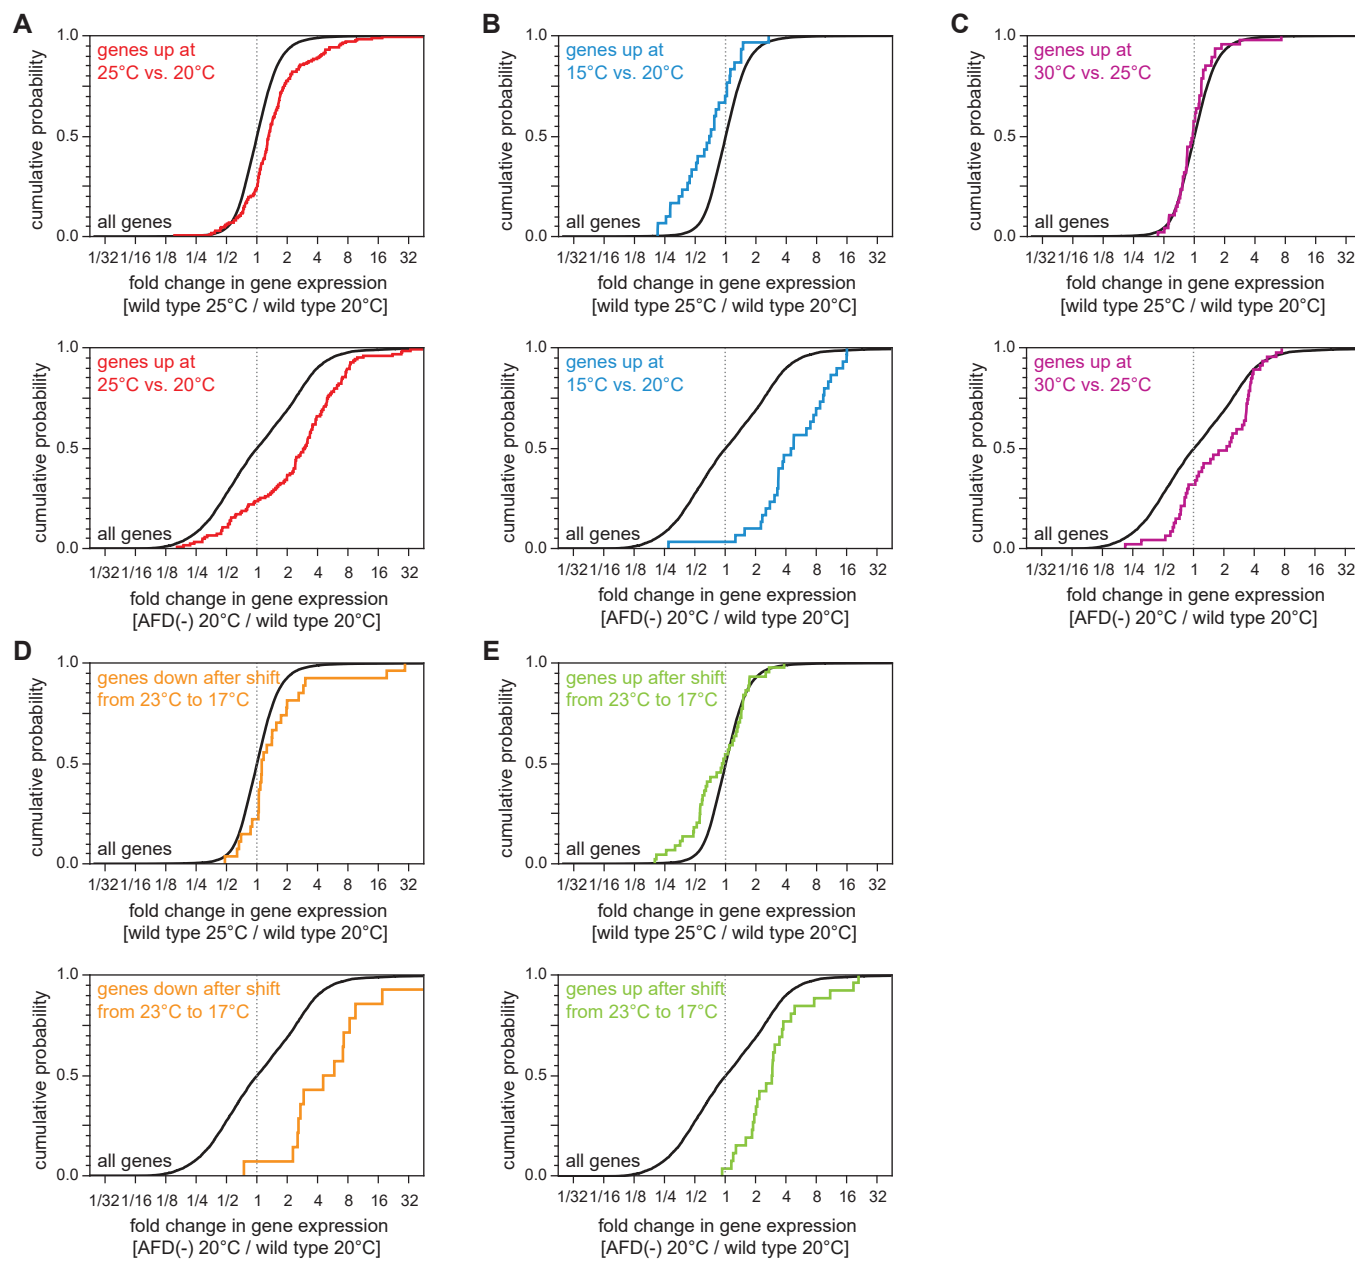

Supplement: supp [file elife-78941-supp-v1.zip]

Figure 2—figure supplement 1

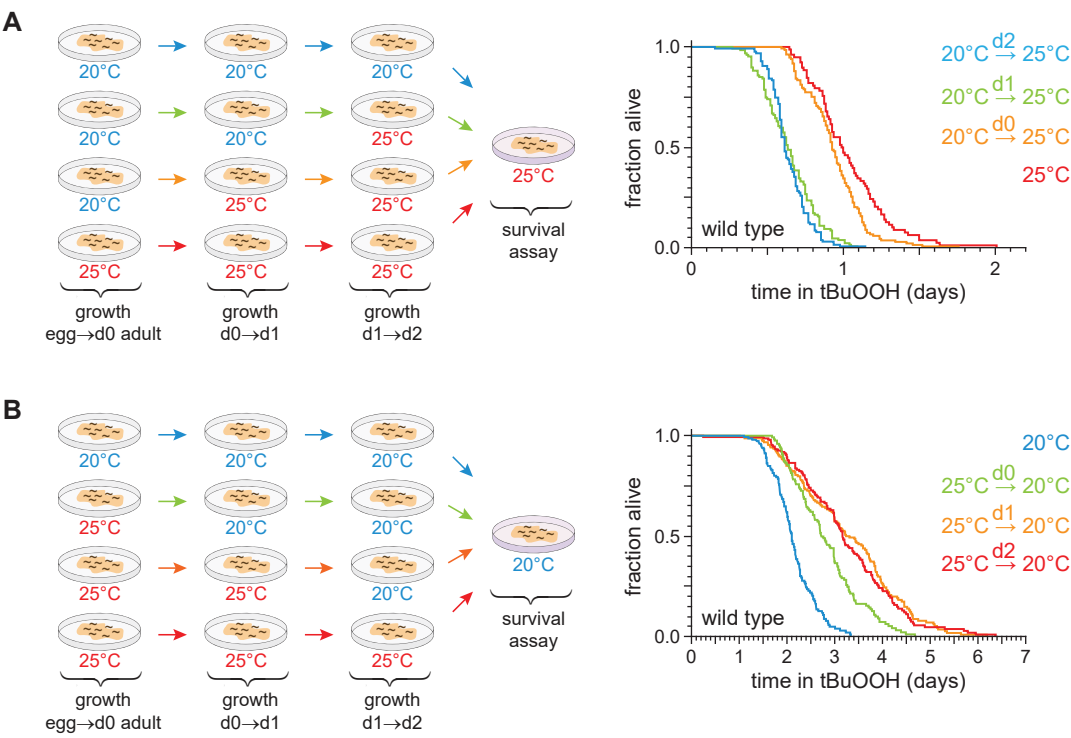

Supplement: supp [file elife-78941-supp-v1.zip]

Figure 4—figure supplement 5

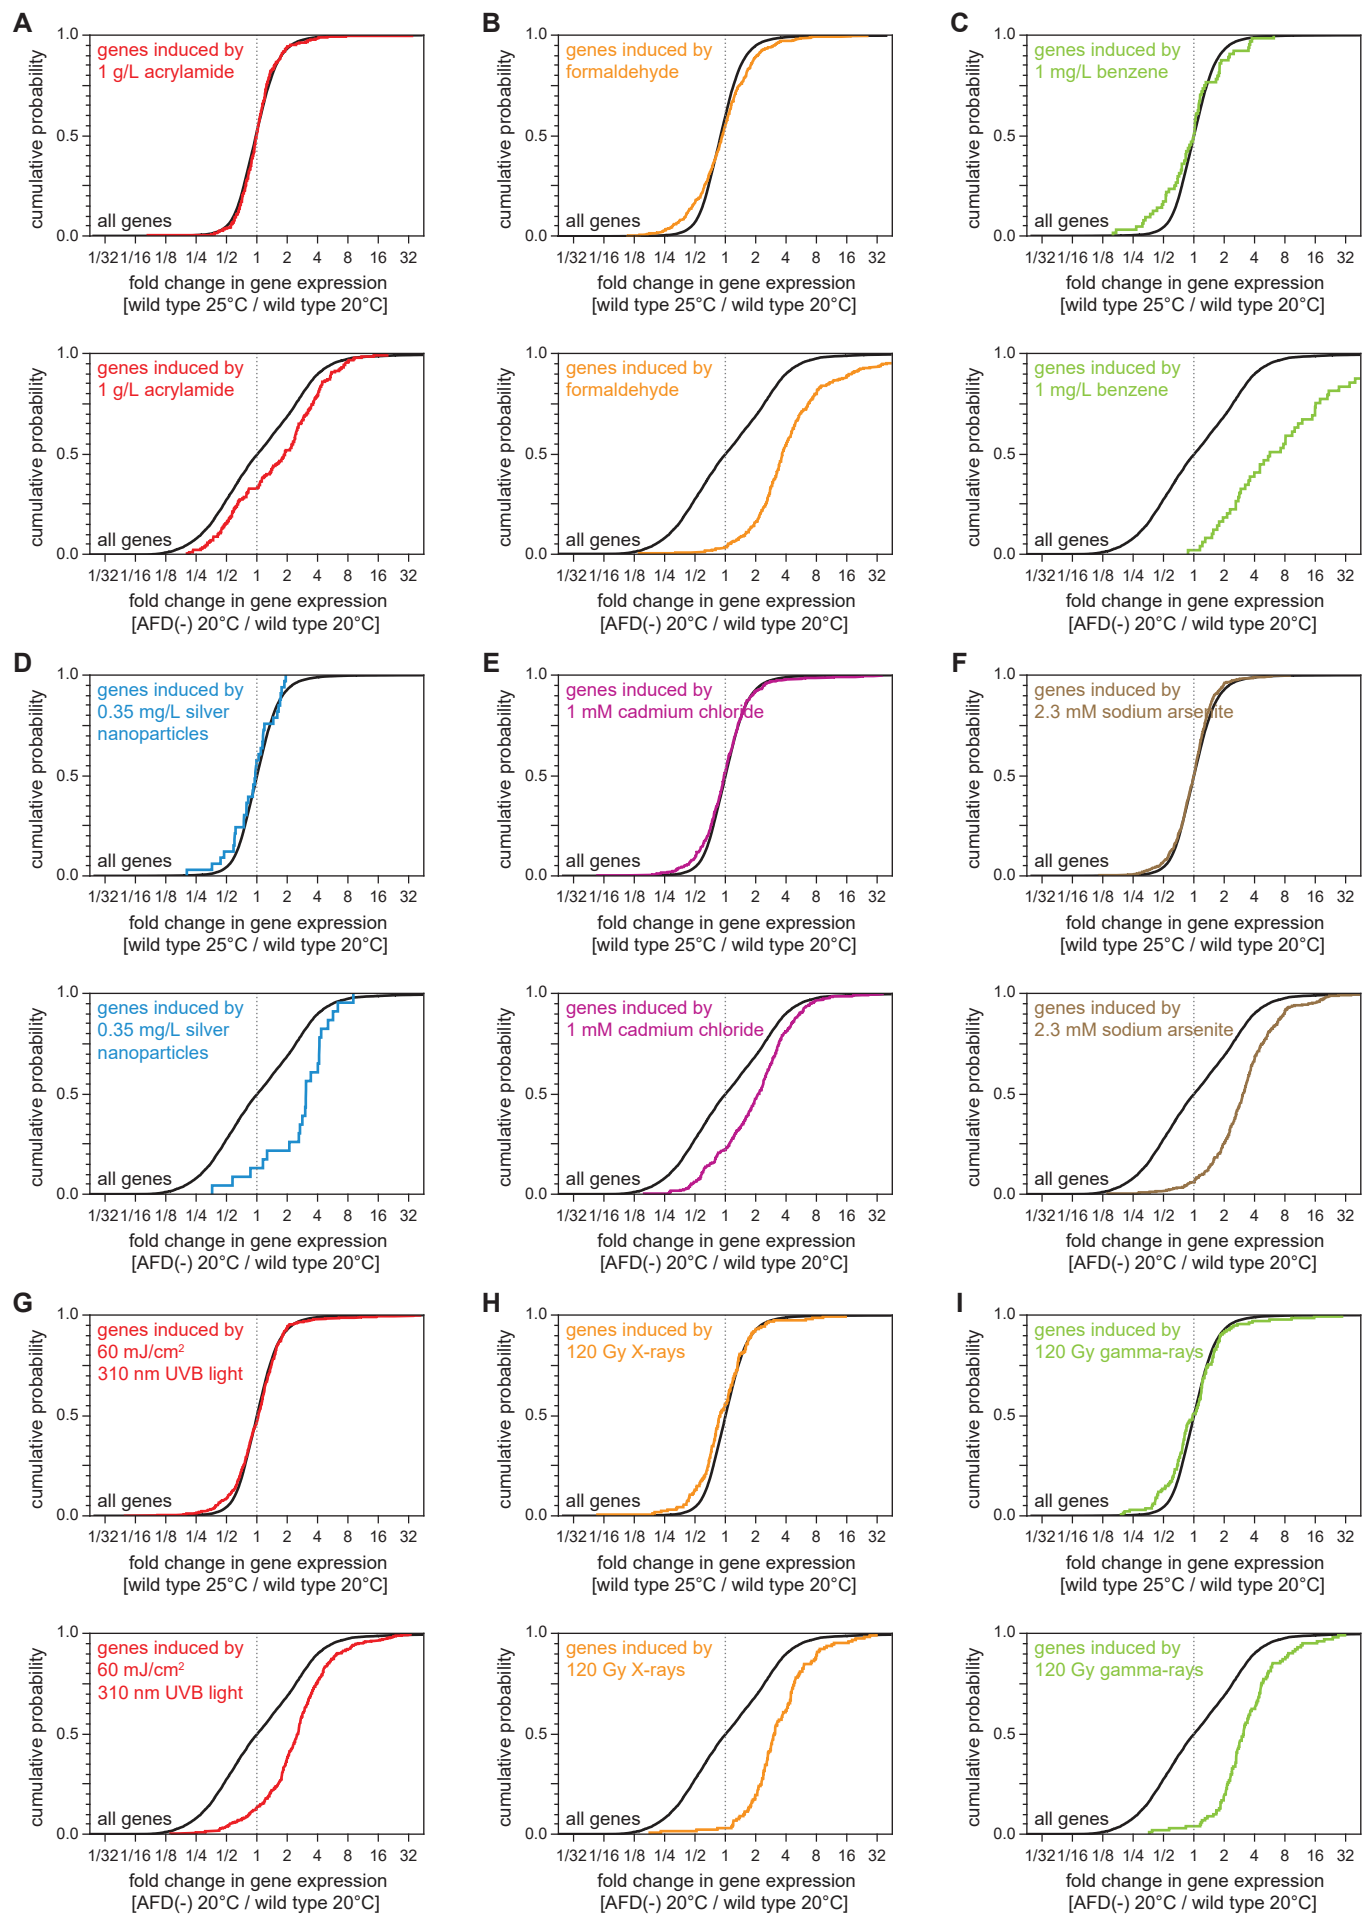

Supplement: supp [file elife-78941-supp-v1.zip]

Figure 4—figure supplement 1

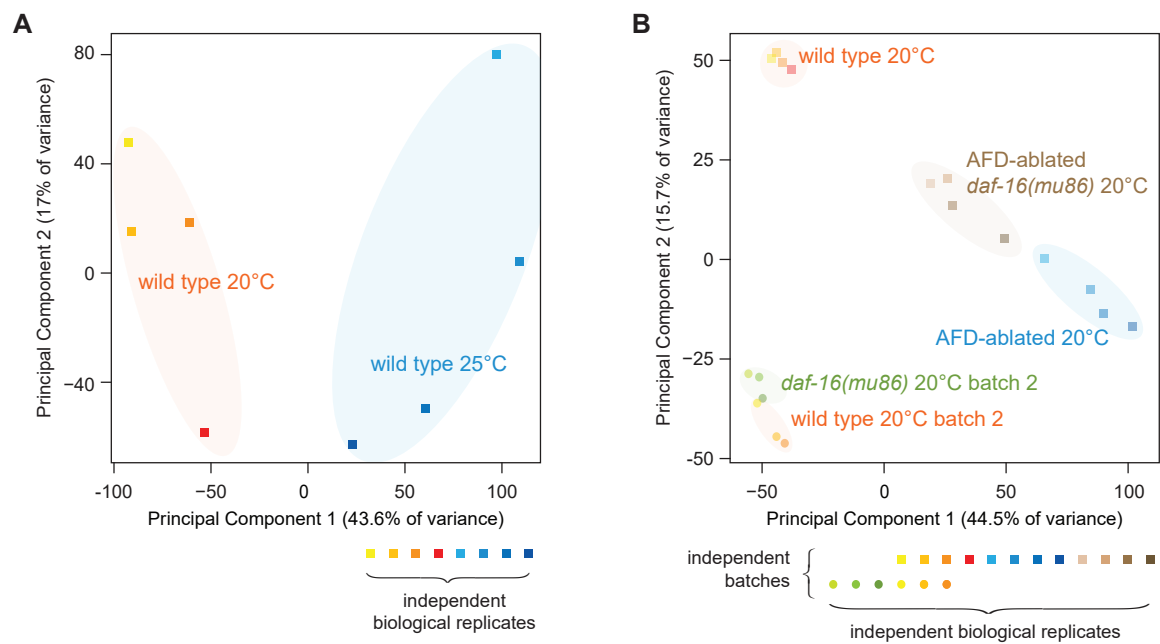

Supplement: supp [file elife-78941-supp-v1.zip]

Figure 4—figure supplement 3

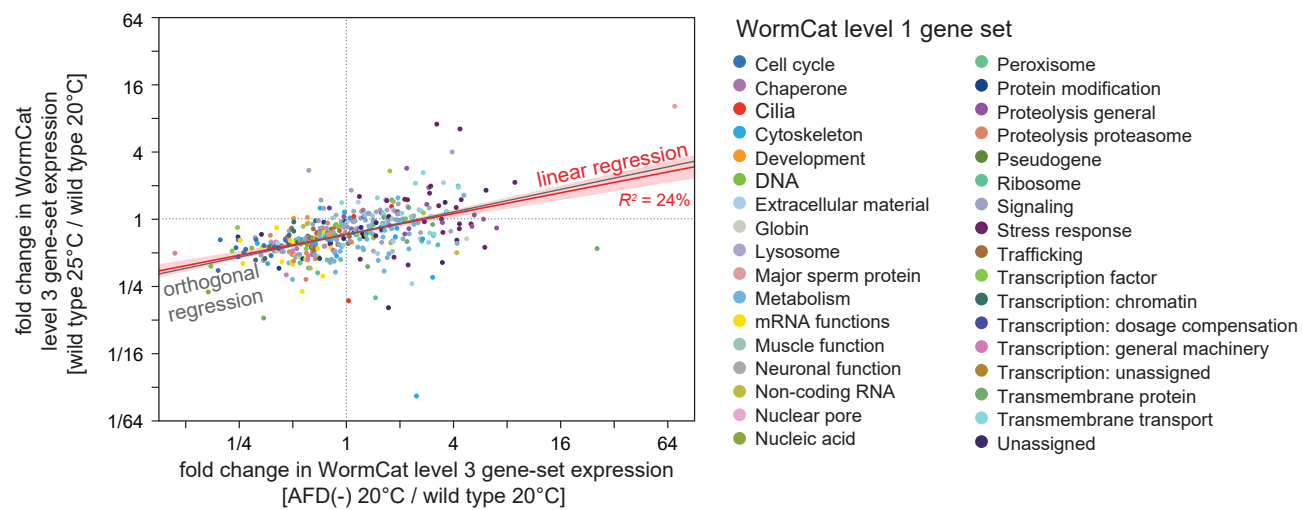

Supplement: supp [file elife-78941-supp-v1.zip]
